# Supplementary material
Source: PubMed Central journal article supplement (PMC357071)
Supplement: pnas_0308512100_4.pdf [file pnas_0308512100_4.pdf]

**Upregulated**

| Probe set   | Name      | Description                                           | NFT <sub>0</sub> | MMSE <sub>0</sub> | NFT <sub>1</sub> | MMSE <sub>1</sub> | ANOVA         | Cntrl      | Incipient  | Moderate   | Severe     |
|-------------|-----------|-------------------------------------------------------|------------------|-------------------|------------------|-------------------|---------------|------------|------------|------------|------------|
| 204177_s_at | ABO26190  | Kelch motif containing protein                        | <b>0.0017</b>    | <b>-0.0012</b>    | 0.0959           | <b>-0.0389</b>    | <b>0.0023</b> | 344 ± 23   | 396 ± 11   | 498 ± 32   | 504 ± 50   |
| 203505_at   | ABCA1     | ATP-binding cassette, sub-family A (ABC1), member 1   | <b>0.0009</b>    | <b>-0.0024</b>    | <b>0.0432</b>    | -0.2938           | <b>0.0084</b> | 802 ± 124  | 1093 ± 209 | 1153 ± 127 | 2307 ± 574 |
| 203741_s_at | ADCY7     | adenylate cyclase 7                                   | <b>0.0464</b>    | <b>-0.0129</b>    | 0.1193           | <b>-0.0061</b>    | 0.1919        | 228 ± 33   | 311 ± 39   | 292 ± 20   | 340 ± 56   |
| 201753_s_at | ADD3      | adducin 3 (gamma)                                     | <b>0.0071</b>    | <b>-0.0032</b>    | <b>0.0287</b>    | -0.0699           | <b>0.0009</b> | 4514 ± 321 | 5928 ± 566 | 8335 ± 749 | 7237 ± 742 |
| 218735_s_at | AF020591  | zinc finger protein                                   | <b>0.0143</b>    | -0.2315           | <b>0.0427</b>    | -0.0670           | 0.3397        | 496 ± 25   | 506 ± 21   | 596 ± 66   | 564 ± 46   |
| 221788_at   | AGM1      | N-acetylglucosamine-phosphate mutase                  | 0.8955           | <b>-0.0164</b>    | -0.1862          | <b>-0.0265</b>    | 0.3263        | 259 ± 27   | 313 ± 56   | 322 ± 39   | 400 ± 80   |
| 205357_s_at | AGTR1     | angiotensin II receptor, type 1                       | <b>0.0017</b>    | <b>-0.0003</b>    | 0.1517           | <b>-0.0147</b>    | <b>0.0075</b> | 79 ± 6     | 105 ± 14   | 122 ± 10   | 138 ± 14   |
| 213592_at   | AGTRL1    | angiotensin II receptor-like 1                        | <b>0.0444</b>    | <b>-0.0459</b>    | <b>0.0168</b>    | <b>-0.0327</b>    | <b>0.0253</b> | 897 ± 172  | 1599 ± 422 | 3549 ± 921 | 2433 ± 622 |
| 212543_at   | AIM1      | absent in melanoma 1                                  | 0.1970           | <b>-0.0054</b>    | <b>0.0184</b>    | -0.1655           | <b>0.0408</b> | 177 ± 19   | 215 ± 22   | 218 ± 13   | 289 ± 44   |
| 222024_s_at | AKAP13    | A kinase (PRKA) anchor protein 13                     | <b>0.0059</b>    | <b>-0.0026</b>    | <b>0.0412</b>    | <b>-0.0187</b>    | <b>0.0097</b> | 441 ± 42   | 513 ± 52   | 641 ± 79   | 869 ± 138  |
| 215483_at   | AKAP9     | A kinase (PRKA) anchor protein (yotiao) 9             | 0.1518           | <b>-0.0230</b>    | 0.4615           | <b>-0.0231</b>    | 0.0890        | 205 ± 45   | 275 ± 27   | 408 ± 75   | 354 ± 77   |
| 214220_s_at | ALMS1     | Alstrom syndrome 1                                    | 0.0641           | <b>-0.0127</b>    | <b>0.0028</b>    | <b>-0.0399</b>    | 0.1605        | 160 ± 17   | 203 ± 18   | 228 ± 23   | 252 ± 52   |
| 205609_at   | ANGPT1    | angiopoietin 1                                        | 0.0907           | <b>-0.0043</b>    | 0.1258           | <b>-0.0190</b>    | 0.1030        | 346 ± 42   | 388 ± 76   | 523 ± 89   | 556 ± 62   |
| 213004_at   | ANGPTL2   | angiopoietin-like 2                                   | <b>0.0000</b>    | <b>-0.0393</b>    | <b>0.0122</b>    | -0.1088           | <b>0.0460</b> | 98 ± 8     | 133 ± 15   | 161 ± 8    | 173 ± 35   |
| 201305_x_at | ANP32B    | acidic (leucine-rich) nuclear phosphoprotein 32 B     | <b>0.0029</b>    | <b>-0.0014</b>    | 0.2229           | <b>-0.0488</b>    | <b>0.0179</b> | 720 ± 86   | 850 ± 111  | 1215 ± 197 | 1253 ± 114 |
| 200845_s_at | AOP2      | anti-oxidant protein 2                                | 0.0819           | <b>-0.0387</b>    | <b>0.0292</b>    | -0.4848           | <b>0.0547</b> | 2495 ± 180 | 2674 ± 239 | 4147 ± 588 | 3524 ± 606 |
| 220237_at   | APG3      | autophagy Apg3p/Aut1p-like                            | 0.0750           | <b>-0.0209</b>    | <b>0.0384</b>    | -0.1811           | <b>0.0440</b> | 60 ± 7     | 50 ± 9     | 91 ± 10    | 127 ± 38   |
| 213553_x_at | APOC1     | apolipoprotein C-I                                    | 0.2519           | <b>-0.0489</b>    | <b>0.0396</b>    | -0.3988           | 0.1150        | 1261 ± 161 | 1713 ± 237 | 1606 ± 135 | 1865 ± 143 |
| 206738_at   | APOC4     | apolipoprotein C-IV                                   | <b>0.0014</b>    | <b>-0.0267</b>    | <b>0.0024</b>    | -0.2108           | <b>0.0482</b> | 179 ± 11   | 235 ± 25   | 281 ± 13   | 305 ± 60   |
| 221013_s_at | APOL2     | apolipoprotein L, 2                                   | 0.1087           | <b>-0.0013</b>    | 0.0910           | <b>-0.0378</b>    | <b>0.0066</b> | 162 ± 20   | 180 ± 13   | 256 ± 17   | 250 ± 30   |
| 211277_x_at | APP       | amyloid beta (A4) precursor protein                   | <b>0.0065</b>    | <b>-0.0024</b>    | <b>0.0521</b>    | <b>-0.0046</b>    | <b>0.0319</b> | 345 ± 18   | 385 ± 28   | 458 ± 24   | 573 ± 108  |
| 214182_at   | ARF6      | ADP-ribosylation factor 6                             | 0.1885           | <b>-0.0027</b>    | 0.3874           | <b>-0.0262</b>    | 0.0753        | 143 ± 10   | 128 ± 26   | 181 ± 23   | 190 ± 11   |
| 217888_s_at | ARFGAP1   | ADP-ribosylation factor GTPase activating protein 1   | 0.2345           | <b>-0.0486</b>    | 0.1206           | <b>-0.0101</b>    | 0.3263        | 602 ± 43   | 658 ± 36   | 744 ± 76   | 735 ± 84   |
| 217348_x_at | ARHGEF15  | Rho guanine nucleotide exchange factor (GEF) 15       | 0.5720           | <b>-0.0164</b>    | <b>0.0480</b>    | <b>-0.0151</b>    | 0.0821        | 199 ± 18   | 235 ± 31   | 226 ± 24   | 295 ± 30   |
| 201954_at   | ARPC1B    | actin related protein 2/3 complex, subunit 1B, 41kDa  | <b>0.0177</b>    | <b>-0.0194</b>    | <b>0.0218</b>    | -0.2238           | 0.1227        | 394 ± 26   | 492 ± 59   | 536 ± 56   | 553 ± 53   |
| 210385_s_at | ARTS-1    | type 1 TNF receptor shedding aminopeptidase regulator | 0.1149           | <b>-0.0082</b>    | 0.3852           | <b>-0.0417</b>    | 0.1942        | 187 ± 26   | 199 ± 29   | 215 ± 10   | 267 ± 36   |
| 209987_s_at | ASCL1     | achaete-scute complex-like 1 (Drosophila)             | <b>0.0416</b>    | <b>-0.0042</b>    | <b>0.0197</b>    | -0.1938           | <b>0.0184</b> | 353 ± 37   | 537 ± 111  | 502 ± 78   | 832 ± 153  |
| 204244_s_at | ASK       | activator of S phase kinase                           | 0.8717           | <b>-0.0304</b>    | <b>0.0294</b>    | -0.2094           | 0.3078        | 107 ± 7    | 97 ± 10    | 110 ± 7    | 126 ± 14   |
| 213238_at   | ATP10D    | ATPase, Class V, type 10D                             | 0.1324           | <b>-0.0307</b>    | <b>0.0384</b>    | -0.2089           | 0.2592        | 289 ± 19   | 297 ± 28   | 317 ± 35   | 370 ± 39   |
| 214594_x_at | ATP8B1    | ATPase, Class I, type 8B, member 1                    | <b>0.0051</b>    | <b>-0.0400</b>    | 0.2453           | <b>-0.0306</b>    | 0.0561        | 1259 ± 205 | 1462 ± 119 | 2399 ± 338 | 2176 ± 557 |
| 213105_s_at | BAIAP3    | BAI1-associated protein 3                             | 0.1084           | <b>-0.0263</b>    | <b>0.0289</b>    | -0.4828           | 0.1003        | 312 ± 19   | 353 ± 48   | 382 ± 25   | 433 ± 42   |
| 210679_x_at | BCL7A     | B-cell CLL/lymphoma 7A                                | <b>0.0250</b>    | <b>-0.0016</b>    | <b>0.0430</b>    | -0.0731           | <b>0.0023</b> | 744 ± 103  | 784 ± 87   | 1431 ± 127 | 1264 ± 199 |
| 201261_x_at | BGN       | biglycan                                              | <b>0.0134</b>    | <b>-0.0022</b>    | <b>0.0318</b>    | <b>-0.0015</b>    | <b>0.0133</b> | 424 ± 33   | 557 ± 32   | 544 ± 47   | 717 ± 94   |
| 213473_at   | BRAP      | BRCA1 associated protein                              | <b>0.0364</b>    | <b>-0.0024</b>    | <b>0.0192</b>    | <b>-0.0153</b>    | <b>0.0087</b> | 177 ± 16   | 231 ± 19   | 241 ± 11   | 253 ± 17   |
| 204520_x_at | BRD1      | bromodomain containing 1                              | 0.1618           | <b>-0.0103</b>    | 0.2763           | <b>-0.0170</b>    | <b>0.0053</b> | 556 ± 49   | 617 ± 46   | 776 ± 16   | 675 ± 36   |
| 207369_at   | BRS3      | bombesin-like receptor 3                              | 0.0584           | <b>-0.0210</b>    | <b>0.0075</b>    | -0.0861           | 0.0734        | 119 ± 14   | 145 ± 15   | 163 ± 26   | 210 ± 32   |
| 220992_s_at | C1orf25   | chromosome 1 open reading frame 25                    | 0.7491           | <b>-0.0408</b>    | 0.3573           | <b>-0.0354</b>    | 0.1346        | 177 ± 12   | 194 ± 27   | 175 ± 8    | 234 ± 24   |
| 209422_at   | C20orf104 | chromosome 20 open reading frame 104                  | 0.1491           | <b>-0.0113</b>    | <b>0.0243</b>    | <b>-0.0391</b>    | 0.1277        | 882 ± 55   | 1015 ± 77  | 1019 ± 38  | 1102 ± 76  |

| Probe set   | Name     | Description                                            | NFT <sub>0</sub> | MMSE <sub>0</sub> | NFT <sub>1</sub> | MMSE <sub>1</sub> | ANOVA         | Cntrl      | Incipient  | Moderate    | Severe     |
|-------------|----------|--------------------------------------------------------|------------------|-------------------|------------------|-------------------|---------------|------------|------------|-------------|------------|
| 221827_at   | C20orf18 | chromosome 20 open reading frame 18                    | <b>0.0144</b>    | <b>-0.0221</b>    | <b>0.0456</b>    | 0.2796            | <b>0.0226</b> | 430 ± 28   | 456 ± 22   | 456 ± 64    | 622 ± 19   |
| 217622_at   | C22orf3  | chromosome 22 open reading frame 3                     | <b>0.0401</b>    | <b>-0.0221</b>    | 0.0616           | <b>-0.0150</b>    | 0.0752        | 120 ± 10   | 142 ± 29   | 204 ± 35    | 241 ± 52   |
| 205500_at   | C5       | complement component 5                                 | <b>0.0406</b>    | -0.1233           | 0.2302           | <b>-0.0336</b>    | 0.2194        | 183 ± 14   | 212 ± 19   | 240 ± 21    | 243 ± 38   |
| 48031_r_at  | C5orf4   | chromosome 5 open reading frame 4                      | <b>0.0116</b>    | <b>-0.0182</b>    | <b>0.0422</b>    | -0.3703           | <b>0.0303</b> | 543 ± 35   | 755 ± 125  | 768 ± 54    | 975 ± 157  |
| 221766_s_at | C6orf37  | chromosome 6 open reading frame 37                     | 0.0579           | <b>-0.0121</b>    | 0.1136           | <b>-0.0463</b>    | 0.1911        | 184 ± 31   | 240 ± 41   | 285 ± 32    | 304 ± 57   |
| 204265_s_at | C6orf9   | chromosome 6 open reading frame 9                      | <b>0.0431</b>    | <b>-0.0024</b>    | 0.0892           | <b>-0.0045</b>    | <b>0.0429</b> | 408 ± 44   | 471 ± 31   | 547 ± 41    | 622 ± 83   |
| 221543_s_at | C8orf2   | chromosome 8 open reading frame 2                      | 0.1488           | <b>-0.0194</b>    | <b>0.0309</b>    | -0.1725           | 0.2136        | 763 ± 76   | 839 ± 29   | 884 ± 30    | 938 ± 58   |
| 214880_x_at | CALD1    | caldesmon 1                                            | 0.1284           | <b>-0.0197</b>    | <b>0.0449</b>    | <b>-0.0125</b>    | 0.1927        | 103 ± 8    | 146 ± 15   | 162 ± 10    | 160 ± 42   |
| 213956_at   | CAP350   | centrosome-associated protein 350                      | 0.0676           | <b>-0.0213</b>    | 0.0893           | <b>-0.0111</b>    | <b>0.0257</b> | 326 ± 44   | 357 ± 29   | 624 ± 83    | 501 ± 116  |
| 211464_x_at | CASP6    | caspase 6, apoptosis-related cysteine protease         | <b>0.0005</b>    | <b>-0.0328</b>    | 0.2753           | <b>-0.0058</b>    | 0.1579        | 104 ± 17   | 143 ± 17   | 189 ± 36    | 206 ± 58   |
| 212586_at   | CAST     | calpastatin                                            | 0.2290           | <b>-0.0017</b>    | 0.0618           | <b>-0.0001</b>    | <b>0.0236</b> | 947 ± 34   | 1222 ± 104 | 1143 ± 61   | 1316 ± 113 |
| 212014_x_at | CD44     | CD44 antigen                                           | 0.1574           | <b>-0.0011</b>    | -0.3565          | <b>-0.0400</b>    | <b>0.0245</b> | 202 ± 43   | 251 ± 20   | 345 ± 58    | 450 ± 76   |
| 205173_x_at | CD58     | CD58 antigen                                           | -0.6922          | <b>-0.0360</b>    | 0.4973           | <b>-0.0105</b>    | 0.6313        | 204 ± 23   | 219 ± 42   | 205 ± 38    | 270 ± 58   |
| 205288_at   | CDC14A   | CDC14 cell division cycle 14 homolog A (S. cerevisiae) | 0.0944           | <b>-0.0002</b>    | <b>0.0000</b>    | <b>-0.0166</b>    | <b>0.0313</b> | 51 ± 5     | 68 ± 8     | 72 ± 8      | 99 ± 17    |
| 210473_s_at | CDC2L2   | cell division cycle 2-like 2                           | <b>0.0022</b>    | <b>-0.0040</b>    | 0.0912           | <b>-0.0263</b>    | 0.0661        | 718 ± 34   | 845 ± 83   | 1021 ± 146  | 1119 ± 136 |
| 214721_x_at | CDC42EP4 | CDC42 effector protein (Rho GTPase binding) 4          | <b>0.0425</b>    | <b>-0.0042</b>    | <b>0.0381</b>    | <b>-0.0265</b>    | 0.1068        | 845 ± 77   | 1065 ± 139 | 1164 ± 62   | 1311 ± 225 |
| 209057_x_at | CDC5L    | CDC5 cell division cycle 5-like (S. pombe)             | 0.3540           | <b>-0.0401</b>    | <b>0.0015</b>    | -0.0797           | 0.1905        | 325 ± 20   | 385 ± 31   | 375 ± 41    | 437 ± 43   |
| 201938_at   | CDK2AP1  | CDK2-associated protein 1                              | 0.4430           | <b>-0.0078</b>    | 0.3673           | <b>-0.0038</b>    | 0.2039        | 6126 ± 401 | 6628 ± 886 | 8130 ± 1006 | 8106 ± 951 |
| 204039_at   | CEBPA    | CCAAT/enhancer binding protein (C/EBP), alpha          | <b>0.0472</b>    | -0.1038           | <b>0.0184</b>    | 0.4440            | 0.1807        | 597 ± 48   | 774 ± 100  | 786 ± 93    | 830 ± 61   |
| 214102_at   | CENTD1   | centaurin, delta 1                                     | <b>0.0056</b>    | <b>-0.0098</b>    | <b>0.0096</b>    | -0.1393           | <b>0.0116</b> | 395 ± 32   | 628 ± 62   | 696 ± 60    | 790 ± 141  |
| 219746_at   | CERD4    | cer-d4 (mouse) homolog                                 | <b>0.0156</b>    | <b>-0.0006</b>    | <b>0.0173</b>    | 0.4469            | <b>0.0000</b> | 294 ± 13   | 424 ± 62   | 382 ± 25    | 599 ± 35   |
| 211862_x_at | CFLAR    | CASP8 and FADD-like apoptosis regulator                | 0.0629           | <b>-0.0129</b>    | <b>0.0302</b>    | -0.0682           | 0.2689        | 270 ± 13   | 291 ± 33   | 329 ± 41    | 345 ± 18   |
| 203461_at   | CHD2     | chromodomain helicase DNA binding protein 2            | <b>0.0015</b>    | <b>-0.0001</b>    | 0.1545           | <b>-0.0180</b>    | <b>0.0000</b> | 143 ± 11   | 178 ± 33   | 184 ± 21    | 352 ± 35   |
| 221059_s_at | CHST6    | carbohydrate sulfotransferase 6                        | <b>0.0221</b>    | <b>-0.0014</b>    | <b>0.0043</b>    | -0.4750           | <b>0.0085</b> | 650 ± 50   | 658 ± 70   | 926 ± 115   | 1061 ± 113 |
| 214135_at   | CLDN18   | claudin 18                                             | <b>0.0325</b>    | -0.1671           | <b>0.0338</b>    | 0.4801            | 0.0680        | 123 ± 15   | 187 ± 22   | 172 ± 17    | 192 ± 27   |
| 204482_at   | CLDN5    | claudin 5                                              | <b>0.0230</b>    | -0.0576           | <b>0.0011</b>    | -0.3048           | <b>0.0121</b> | 684 ± 76   | 1053 ± 123 | 1262 ± 153  | 1111 ± 109 |
| 208659_at   | CLIC1    | chloride intracellular channel 1                       | 0.8258           | <b>-0.0403</b>    | -0.2440          | <b>-0.0457</b>    | 0.4004        | 486 ± 71   | 534 ± 50   | 627 ± 22    | 614 ± 94   |
| 222043_at   | CLU      | clusterin                                              | <b>0.0230</b>    | <b>-0.0176</b>    | <b>0.0040</b>    | <b>0.0373</b>     | <b>0.0226</b> | 1111 ± 60  | 982 ± 60   | 1716 ± 273  | 1584 ± 207 |
| 61732_r_at  | CMG1     | capillary morphogenesis protein 1                      | <b>0.0002</b>    | <b>-0.0158</b>    | <b>0.0069</b>    | <b>-0.0166</b>    | <b>0.0255</b> | 21 ± 4     | 31 ± 4     | 35 ± 5      | 62 ± 18    |
| 201774_s_at | CNAP1    | chromosome condensation-related SMC-assoc. prot. 1     | 0.1620           | <b>-0.0075</b>    | 0.3686           | <b>-0.0276</b>    | 0.2398        | 147 ± 18   | 152 ± 31   | 179 ± 13    | 202 ± 10   |
| 212189_s_at | COG4     | component of oligomeric golgi complex 4                | <b>0.0119</b>    | -0.1525           | <b>0.0294</b>    | -0.4694           | 0.2053        | 335 ± 46   | 423 ± 42   | 448 ± 31    | 486 ± 82   |
| 52651_at    | COL8A2   | collagen, type VIII, alpha 2                           | <b>0.0147</b>    | <b>-0.0006</b>    | <b>0.0083</b>    | <b>-0.0204</b>    | <b>0.0028</b> | 216 ± 20   | 311 ± 28   | 317 ± 24    | 355 ± 24   |
| 206100_at   | CPM      | carboxypeptidase M                                     | 0.1786           | <b>-0.0370</b>    | 0.2926           | <b>-0.0122</b>    | 0.1208        | 196 ± 25   | 301 ± 49   | 301 ± 53    | 346 ± 44   |
| 202118_s_at | CPNE3    | copine III                                             | <b>0.0249</b>    | <b>-0.0163</b>    | 0.2366           | <b>-0.0141</b>    | <b>0.0019</b> | 258 ± 28   | 317 ± 36   | 424 ± 17    | 345 ± 23   |
| 33132_at    | CPSF1    | cleavage and polyadenylation specific factor 1, 160kDa | <b>0.0495</b>    | -0.1760           | <b>0.0362</b>    | <b>-0.0518</b>    | 0.0953        | 483 ± 39   | 707 ± 77   | 759 ± 73    | 713 ± 129  |
| 204264_at   | CPT2     | carnitine palmitoyltransferase II                      | 0.1620           | <b>-0.0001</b>    | <b>0.0063</b>    | <b>-0.0319</b>    | <b>0.0017</b> | 104 ± 6    | 133 ± 12   | 132 ± 13    | 177 ± 14   |
| 217552_x_at | CR1      | complement component (3b/4b) receptor 1                | 0.1135           | <b>-0.0040</b>    | 0.3839           | <b>-0.0237</b>    | 0.0830        | 19 ± 7     | 35 ± 11    | 43 ± 13     | 63 ± 14    |
| 209716_at   | CSF1     | colony stimulating factor 1 (macrophage)               | 0.2485           | <b>-0.0008</b>    | 0.1086           | <b>-0.0167</b>    | <b>0.0039</b> | 367 ± 39   | 506 ± 50   | 500 ± 44    | 722 ± 98   |
| 203575_at   | CSNK2A2  | casein kinase 2, alpha prime polypeptide               | <b>0.0004</b>    | <b>-0.0530</b>    | <b>0.0046</b>    | -0.1334           | 0.0685        | 370 ± 8    | 389 ± 13   | 459 ± 37    | 437 ± 31   |

| Probe set   | Name    | Description                                                | NFT <sub>0</sub> | MMSE <sub>0</sub> | NFT <sub>1</sub> | MMSE <sub>1</sub> | ANOVA         | Cntrl      | Incipient  | Moderate   | Severe     |
|-------------|---------|------------------------------------------------------------|------------------|-------------------|------------------|-------------------|---------------|------------|------------|------------|------------|
| 204619_s_at | CSPG2   | chondroitin sulfate proteoglycan 2 (versican)              | 0.1038           | <b>-0.0247</b>    | 0.0746           | <b>-0.0042</b>    | 0.1689        | 389 ± 31   | 519 ± 63   | 575 ± 85   | 558 ± 63   |
| 219080_s_at | CTPS2   | CTP synthase II                                            | 0.1321           | <b>-0.0001</b>    | <b>0.0362</b>    | -0.2678           | <b>0.0003</b> | 93 ± 11    | 112 ± 11   | 109 ± 13   | 196 ± 24   |
| 206297_at   | CTRC    | chymotrypsin C (caldecrin)                                 | 0.3537           | <b>-0.0247</b>    | <b>0.0352</b>    | -0.4192           | <b>0.0299</b> | 162 ± 22   | 195 ± 30   | 181 ± 29   | 293 ± 43   |
| 202087_s_at | CTSL    | cathepsin L                                                | 0.5555           | <b>-0.0272</b>    | -0.4994          | <b>-0.0402</b>    | 0.6177        | 647 ± 40   | 679 ± 62   | 733 ± 60   | 743 ± 80   |
| 202901_x_at | CTSS    | cathepsin S                                                | 0.4358           | <b>-0.0489</b>    | <b>0.0065</b>    | -0.0708           | 0.1185        | 95 ± 8     | 144 ± 18   | 134 ± 18   | 149 ± 22   |
| 201424_s_at | CUL4A   | cullin 4A                                                  | <b>0.0516</b>    | <b>-0.0168</b>    | 0.2723           | <b>-0.0061</b>    | <b>0.0353</b> | 336 ± 21   | 386 ± 43   | 483 ± 46   | 441 ± 28   |
| 204309_at   | CYP11A  | cytochrome P450, subfamily XIA                             | 0.1618           | <b>-0.0057</b>    | 0.2687           | <b>-0.0285</b>    | <b>0.0499</b> | 119 ± 12   | 143 ± 6    | 150 ± 6    | 175 ± 23   |
| 220432_s_at | CYP39A1 | cytochrome P450, subfamily XXXIX 1                         | 0.0859           | <b>-0.0161</b>    | <b>0.0101</b>    | -0.1890           | 0.1692        | 31 ± 5     | 40 ± 9     | 45 ± 5     | 57 ± 12    |
| 206515_at   | CYP4F3  | cytochrome P450, subfamily IVF, polypeptide 3              | 0.0923           | <b>-0.0010</b>    | <b>0.0075</b>    | -0.3227           | <b>0.0230</b> | 124 ± 17   | 143 ± 30   | 229 ± 52   | 367 ± 94   |
| 202646_s_at | D1S155E | NRAS-related gene                                          | <b>0.0484</b>    | -0.1550           | <b>0.0010</b>    | -0.1643           | 0.3444        | 2687 ± 151 | 2897 ± 196 | 3029 ± 101 | 2993 ± 141 |
| 206878_at   | DAO     | D-amino-acid oxidase                                       | 0.2293           | <b>-0.0445</b>    | <b>0.0137</b>    | -0.3370           | 0.0682        | 270 ± 15   | 335 ± 60   | 321 ± 32   | 432 ± 50   |
| 206324_s_at | DAPK2   | death-associated protein kinase 2                          | <b>0.0267</b>    | <b>-0.0082</b>    | 0.0843           | <b>-0.0030</b>    | <b>0.0044</b> | 122 ± 15   | 174 ± 16   | 141 ± 7    | 267 ± 50   |
| 201623_s_at | DARS    | aspartyl-tRNA synthetase                                   | 0.6838           | <b>-0.0082</b>    | <b>0.0183</b>    | -0.0978           | 0.1298        | 1240 ± 48  | 1426 ± 57  | 1476 ± 115 | 1625 ± 181 |
| 209335_at   | DCN     | decorin                                                    | 0.6224           | <b>-0.0495</b>    | 0.4554           | <b>-0.0316</b>    | 0.3997        | 246 ± 17   | 292 ± 13   | 282 ± 28   | 317 ± 47   |
| 208024_s_at | DGCR6   | DiGeorge syndrome critical region gene 6                   | <b>0.0406</b>    | -0.7078           | <b>0.0413</b>    | -0.1414           | 0.0739        | 771 ± 56   | 849 ± 30   | 1027 ± 59  | 835 ± 113  |
| 204383_at   | DGSI    | DiGeorge syndrome critical region gene DGSI                | <b>0.0490</b>    | <b>-0.0081</b>    | <b>0.0315</b>    | -0.1106           | 0.0821        | 276 ± 16   | 273 ± 19   | 319 ± 22   | 364 ± 43   |
| 206061_s_at | DICER1  | Dicer1, Dcr-1 homolog (Drosophila)                         | 0.1312           | <b>-0.0282</b>    | 0.4132           | <b>-0.0319</b>    | 0.1687        | 469 ± 33   | 533 ± 77   | 596 ± 59   | 637 ± 55   |
| 215529_x_at | DIP2    | disco-interacting protein 2 (Drosophila) homolog           | <b>0.0041</b>    | -0.1117           | 0.1679           | <b>-0.0180</b>    | 0.4337        | 600 ± 77   | 753 ± 83   | 844 ± 170  | 923 ± 226  |
| 208216_at   | DLX4    | distal-less homeobox 4                                     | 0.1211           | <b>-0.0191</b>    | <b>0.0476</b>    | <b>-0.0375</b>    | 0.0790        | 118 ± 14   | 138 ± 11   | 154 ± 21   | 194 ± 30   |
| 208382_s_at | DMC1    | DMC1 dosage suppressor of mck1 homolog                     | 0.2943           | <b>-0.0442</b>    | <b>0.0145</b>    | <b>-0.0010</b>    | <b>0.0125</b> | 121 ± 6    | 187 ± 24   | 132 ± 16   | 219 ± 34   |
| 222247_at   | DXS542  | putative X-linked retinopathy protein                      | 0.4498           | <b>-0.0042</b>    | 0.1001           | <b>-0.0160</b>    | <b>0.0358</b> | 117 ± 8    | 141 ± 15   | 147 ± 13   | 175 ± 17   |
| 208713_at   | E1B-AP5 | E1B-55kDa-associated protein 5                             | 0.0926           | <b>-0.0300</b>    | <b>0.0236</b>    | -0.2869           | <b>0.0231</b> | 611 ± 39   | 810 ± 73   | 758 ± 39   | 837 ± 67   |
| 204464_s_at | EDNRA   | endothelin receptor type A                                 | <b>0.0209</b>    | -0.1151           | 0.0798           | <b>-0.0423</b>    | 0.4552        | 178 ± 16   | 211 ± 21   | 217 ± 22   | 229 ± 33   |
| 201843_s_at | EFEMP1  | EGF-containing fibulin-like extracellular matrix protein 1 | 0.1235           | <b>-0.0246</b>    | 0.2269           | <b>-0.0413</b>    | 0.2709        | 518 ± 50   | 673 ± 145  | 812 ± 189  | 935 ± 191  |
| 206580_s_at | EFEMP2  | EGF-containing fibulin-like extracellular matrix protein 2 | <b>0.0049</b>    | <b>-0.0071</b>    | <b>0.0496</b>    | -0.0812           | <b>0.0171</b> | 682 ± 79   | 701 ± 61   | 1081 ± 90  | 1051 ± 173 |
| 218287_s_at | EIF2C1  | eukaryotic translation initiation factor 2C, 1             | <b>0.0175</b>    | -0.1229           | <b>0.0238</b>    | -0.4644           | 0.1303        | 476 ± 30   | 586 ± 56   | 592 ± 30   | 663 ± 89   |
| 217820_s_at | ENAH    | enabled homolog (Drosophila)                               | <b>0.0499</b>    | <b>-0.0125</b>    | 0.2796           | <b>-0.0357</b>    | <b>0.0402</b> | 1003 ± 42  | 1081 ± 99  | 1448 ± 189 | 1348 ± 61  |
| 213579_s_at | EP300   | E1A binding protein p300                                   | <b>0.0097</b>    | <b>-0.0009</b>    | 0.1249           | <b>-0.0004</b>    | <b>0.0051</b> | 203 ± 25   | 266 ± 19   | 246 ± 21   | 348 ± 36   |
| 202609_at   | EPS8    | epidermal growth factor receptor pathway substrate 8       | 0.4848           | <b>-0.0113</b>    | 0.3343           | <b>-0.0202</b>    | 0.3262        | 813 ± 39   | 849 ± 102  | 1025 ± 88  | 1024 ± 174 |
| 212087_s_at | ERAL1   | Era G-protein-like 1 (E. coli)                             | 0.2567           | <b>-0.0210</b>    | <b>0.0372</b>    | <b>-0.0020</b>    | 0.0745        | 589 ± 26   | 656 ± 33   | 633 ± 55   | 783 ± 75   |
| 217941_s_at | ERBB2IP | erb2 interacting protein                                   | <b>0.0126</b>    | <b>-0.0033</b>    | -0.4232          | <b>-0.0457</b>    | <b>0.0032</b> | 2624 ± 324 | 3068 ± 269 | 4899 ± 635 | 4093 ± 386 |
| 203643_at   | ERF     | Ets2 repressor factor                                      | <b>0.0076</b>    | <b>-0.0039</b>    | <b>0.0463</b>    | -0.1209           | <b>0.0003</b> | 181 ± 32   | 363 ± 33   | 447 ± 52   | 420 ± 48   |
| 213873_at   | ESDN    | endothelial & sm. muscle derived neuropilin-like protein   | 0.0565           | <b>-0.0356</b>    | <b>0.0192</b>    | -0.1737           | 0.1039        | 152 ± 10   | 205 ± 20   | 195 ± 16   | 256 ± 53   |
| 209214_s_at | EWSR1   | Ewing sarcoma breakpoint region 1                          | <b>0.0184</b>    | <b>-0.0015</b>    | 0.3634           | <b>-0.0204</b>    | <b>0.0153</b> | 1151 ± 47  | 1317 ± 96  | 1371 ± 42  | 1466 ± 69  |
| 50376_at    | EZF-2   | endothelial zinc finger protein 2                          | <b>0.0047</b>    | -0.0929           | <b>0.0357</b>    | -0.4982           | 0.0750        | 943 ± 78   | 1307 ± 234 | 1181 ± 136 | 1619 ± 229 |
| 203989_x_at | F2R     | coagulation factor II (thrombin) receptor                  | 0.2415           | <b>-0.0155</b>    | <b>0.0442</b>    | -0.0761           | <b>0.0227</b> | 49 ± 8     | 67 ± 7     | 63 ± 10    | 100 ± 18   |
| 208962_s_at | FADS1   | fatty acid desaturase 1                                    | <b>0.0077</b>    | <b>-0.0010</b>    | 0.0692           | <b>-0.0475</b>    | <b>0.0059</b> | 1176 ± 114 | 1536 ± 158 | 2085 ± 232 | 2454 ± 398 |
| 209405_s_at | FAM3A   | family with sequence similarity 3, member A                | <b>0.0042</b>    | -0.2095           | <b>0.0299</b>    | 0.2812            | 0.1813        | 267 ± 9    | 341 ± 45   | 397 ± 54   | 369 ± 52   |
| 202766_s_at | FBN1    | fibrillin 1 (Marfan syndrome)                              | <b>0.0393</b>    | <b>-0.0008</b>    | -0.3708          | <b>-0.0354</b>    | <b>0.0410</b> | 303 ± 25   | 313 ± 18   | 385 ± 24   | 395 ± 39   |

| Probe set   | Name     | Description                                              | NFT <sub>0</sub> | MMSE <sub>0</sub> | NFT <sub>1</sub> | MMSE <sub>1</sub> | ANOVA         | Cntrl      | Incipient  | Moderate    | Severe      |
|-------------|----------|----------------------------------------------------------|------------------|-------------------|------------------|-------------------|---------------|------------|------------|-------------|-------------|
| 203184_at   | FBN2     | fibrillin 2 (congenital contractural arachnodactyly)     | <b>0.0038</b>    | <b>-0.0005</b>    | <b>0.0026</b>    | -0.1568           | <b>0.0004</b> | 73 ± 8     | 100 ± 4    | 95 ± 10     | 156 ± 21    |
| 213940_s_at | FBP17    | formin-binding protein 17                                | <b>0.0310</b>    | -0.2360           | <b>0.0351</b>    | -0.1219           | 0.0597        | 266 ± 35   | 377 ± 65   | 485 ± 71    | 346 ± 52    |
| 214623_at   | FBXW3    | F-box and WD-40 domain protein 3                         | <b>0.0084</b>    | <b>-0.0163</b>    | <b>0.0019</b>    | -0.0990           | <b>0.0179</b> | 34 ± 9     | 69 ± 18    | 80 ± 18     | 134 ± 35    |
| 204379_s_at | FGFR3    | fibroblast growth factor receptor 3                      | <b>0.0009</b>    | <b>-0.0075</b>    | <b>0.0018</b>    | -0.1005           | <b>0.0349</b> | 1925 ± 183 | 2388 ± 291 | 3023 ± 414  | 3684 ± 718  |
| 205305_at   | FGL1     | fibrinogen-like 1                                        | <b>0.0010</b>    | <b>-0.0038</b>    | 0.2055           | <b>-0.0102</b>    | <b>0.0214</b> | 158 ± 14   | 189 ± 13   | 223 ± 23    | 286 ± 50    |
| 222065_s_at | FLII     | flightless I homolog (Drosophila)                        | <b>0.0534</b>    | <b>-0.0288</b>    | -0.4035          | <b>-0.0297</b>    | 0.2726        | 324 ± 17   | 359 ± 46   | 386 ± 10    | 395 ± 31    |
| 218993_at   | FLJ10581 | putative RNA methyltransferase                           | <b>0.0125</b>    | -0.1307           | 0.1828           | <b>-0.0363</b>    | <b>0.0507</b> | 348 ± 13   | 364 ± 13   | 329 ± 30    | 430 ± 36    |
| 218485_s_at | FLJ11320 | GDP-fucose transporter 1                                 | 0.1421           | <b>-0.0224</b>    | 0.1217           | <b>-0.0303</b>    | <b>0.0163</b> | 182 ± 15   | 202 ± 12   | 180 ± 17    | 270 ± 33    |
| 218658_s_at | FLJ12934 | likely ortholog of mouse actin-related protein 8 homolog | <b>0.0081</b>    | <b>-0.0206</b>    | <b>0.0037</b>    | -0.1453           | <b>0.0018</b> | 205 ± 13   | 313 ± 38   | 300 ± 7     | 330 ± 21    |
| 207876_s_at | FLNC     | filamin C, gamma (actin binding protein 280)             | <b>0.0000</b>    | <b>-0.0031</b>    | <b>0.0096</b>    | -0.2264           | <b>0.0220</b> | 296 ± 28   | 363 ± 88   | 487 ± 52    | 576 ± 90    |
| 218053_at   | FNBP3    | formin binding protein 3                                 | <b>0.0032</b>    | <b>-0.0028</b>    | <b>0.0247</b>    | <b>-0.0094</b>    | <b>0.0012</b> | 820 ± 51   | 979 ± 63   | 1334 ± 126  | 1194 ± 80   |
| 210608_s_at | FUT2     | fucosyltransferase 2 (secretor status included)          | <b>0.0025</b>    | <b>-0.0411</b>    | <b>0.0107</b>    | -0.3321           | 0.0771        | 150 ± 8    | 165 ± 12   | 164 ± 13    | 209 ± 27    |
| 202419_at   | FVT1     | follicular lymphoma variant translocation 1              | <b>0.0037</b>    | <b>-0.0255</b>    | 0.2682           | <b>-0.0355</b>    | 0.1621        | 1159 ± 84  | 1279 ± 108 | 1477 ± 108  | 1416 ± 139  |
| 212486_s_at | FYN      | FYN oncogene related to SRC, FGR, YES                    | 0.1121           | <b>-0.0214</b>    | 0.2110           | <b>-0.0053</b>    | 0.0766        | 729 ± 44   | 807 ± 99   | 1057 ± 118  | 954 ± 113   |
| 209414_at   | FZR1     | Fzr1 protein                                             | 0.0802           | <b>-0.0120</b>    | <b>0.0051</b>    | <b>-0.0004</b>    | <b>0.0042</b> | 114 ± 9    | 162 ± 8    | 177 ± 15    | 194 ± 22    |
| 220886_at   | GABRQ    | gamma-aminobutyric acid (GABA) receptor, theta           | 0.1085           | <b>-0.0081</b>    | <b>0.0039</b>    | <b>-0.0035</b>    | <b>0.0053</b> | 98 ± 11    | 188 ± 27   | 155 ± 13    | 205 ± 29    |
| 205354_at   | GAMT     | guanidinoacetate N-methyltransferase                     | <b>0.0054</b>    | -0.0940           | <b>0.0021</b>    | -0.1239           | 0.1569        | 317 ± 31   | 370 ± 30   | 364 ± 43    | 478 ± 80    |
| 202270_at   | GBP1     | guanylate binding protein 1, interferon-inducible, 67kDa | 0.4795           | <b>-0.0005</b>    | 0.4933           | <b>-0.0312</b>    | <b>0.0459</b> | 84 ± 17    | 90 ± 16    | 154 ± 26    | 164 ± 33    |
| 206397_x_at | GDF1     | growth differentiation factor 1                          | <b>0.0007</b>    | <b>-0.0021</b>    | <b>0.0047</b>    | 0.1810            | <b>0.0013</b> | 3388 ± 448 | 3988 ± 621 | 4835 ± 615  | 9008 ± 1706 |
| 201667_at   | GJA1     | gap junction protein, alpha 1, 43kDa (connexin 43)       | <b>0.0088</b>    | <b>-0.0029</b>    | 0.2614           | <b>-0.0394</b>    | <b>0.0066</b> | 8527 ± 616 | 9294 ± 933 | 3145 ± 1106 | 1958 ± 1320 |
| 207034_s_at | GLI2     | GLI-Kruppel family member GLI2                           | <b>0.0394</b>    | <b>-0.0313</b>    | <b>0.0002</b>    | <b>-0.0537</b>    | <b>0.0125</b> | 53 ± 6     | 94 ± 16    | 93 ± 8      | 96 ± 9      |
| 204187_at   | GMPR     | guanosine monophosphate reductase                        | <b>0.0020</b>    | <b>-0.0003</b>    | -0.2771          | <b>-0.0474</b>    | <b>0.0068</b> | 302 ± 34   | 346 ± 63   | 558 ± 102   | 663 ± 97    |
| 201180_s_at | GNAI3    | G protein, alpha inhibiting activity polypeptide 3       | 0.1123           | <b>-0.0083</b>    | 0.3466           | <b>-0.0228</b>    | 0.0947        | 946 ± 113  | 1147 ± 112 | 1067 ± 82   | 1310 ± 81   |
| 204993_at   | GNAZ     | G protein, alpha z polypeptide                           | <b>0.0099</b>    | <b>-0.0145</b>    | <b>0.0088</b>    | -0.0983           | <b>0.0075</b> | 943 ± 54   | 1089 ± 18  | 1052 ± 71   | 1320 ± 104  |
| 201567_s_at | GOLGA4   | golgi autoantigen, golgin subfamily a, 4                 | 0.5147           | <b>-0.0185</b>    | 0.4713           | <b>-0.0085</b>    | 0.2212        | 740 ± 42   | 859 ± 75   | 879 ± 78    | 934 ± 62    |
| 213206_at   | GOSR2    | golgi SNAP receptor complex member 2                     | <b>0.0171</b>    | -0.2925           | 0.3581           | <b>-0.0243</b>    | 0.1655        | 82 ± 14    | 96 ± 16    | 139 ± 13    | 122 ± 31    |
| 211977_at   | GPR107   | G protein-coupled receptor 107                           | 0.1652           | <b>-0.0414</b>    | <b>0.0094</b>    | -0.4349           | 0.0648        | 280 ± 16   | 355 ± 44   | 305 ± 22    | 424 ± 61    |
| 206960_at   | GPR23    | G protein-coupled receptor 23                            | <b>0.0237</b>    | -0.5581           | <b>0.0386</b>    | <b>-0.0143</b>    | 0.2369        | 61 ± 9     | 86 ± 17    | 97 ± 12     | 76 ± 12     |
| 208035_at   | GRM6     | glutamate receptor, metabotropic 6                       | 0.1456           | <b>-0.0001</b>    | 0.2317           | <b>-0.0015</b>    | <b>0.0001</b> | 281 ± 17   | 306 ± 24   | 286 ± 29    | 492 ± 46    |
| 209945_s_at | GSK3B    | glycogen synthase kinase 3 beta                          | <b>0.0279</b>    | -0.0703           | 0.1326           | <b>-0.0481</b>    | <b>0.0448</b> | 419 ± 24   | 548 ± 55   | 559 ± 18    | 616 ± 77    |
| 202451_at   | GTF2H1   | general transcription factor IIH, polypeptide 1, 62kDa   | 0.0620           | <b>-0.0457</b>    | <b>0.0252</b>    | -0.1414           | <b>0.0349</b> | 653 ± 49   | 743 ± 56   | 894 ± 63    | 815 ± 59    |
| 222104_x_at | GTF2H3   | general transcription factor IIH, polypeptide 3, 34kDa   | <b>0.0188</b>    | <b>-0.0183</b>    | <b>0.0120</b>    | -0.1941           | <b>0.0192</b> | 267 ± 26   | 447 ± 70   | 546 ± 75    | 523 ± 79    |
| 210891_s_at | GTF2I    | general transcription factor II, i                       | 0.2744           | <b>-0.0106</b>    | 0.4968           | <b>-0.0119</b>    | 0.0945        | 7358 ± 359 | 7783 ± 546 | 8911 ± 158  | 8478 ± 660  |
| 215093_at   | H105E3   | NAD(P) dependent steroid dehydrogenase-like; H105e3      | <b>0.0019</b>    | <b>-0.0135</b>    | 0.2719           | <b>-0.0205</b>    | <b>0.0545</b> | 187 ± 12   | 219 ± 14   | 229 ± 11    | 258 ± 28    |
| 220936_s_at | H2AFJ    | H2A histone family, member J                             | 0.0934           | <b>-0.0112</b>    | 0.4641           | <b>-0.0283</b>    | <b>0.0453</b> | 95 ± 12    | 100 ± 17   | 91 ± 12     | 145 ± 16    |
| 212205_at   | H2AV     | histone H2A.F/Z variant                                  | <b>0.0383</b>    | -0.1289           | 0.1438           | <b>-0.0485</b>    | <b>0.0417</b> | 3246 ± 90  | 3551 ± 178 | 4050 ± 157  | 3704 ± 314  |
| 211998_at   | H3F3B    | H3 histone, family 3B (H3.3B)                            | <b>0.0179</b>    | <b>-0.0191</b>    | <b>0.0119</b>    | -0.3470           | <b>0.0432</b> | 1123 ± 66  | 1487 ± 171 | 1755 ± 138  | 1810 ± 328  |
| 220801_s_at | HAO2     | hydroxyacid oxidase 2 (long chain)                       | 0.1094           | <b>-0.0016</b>    | <b>0.0467</b>    | <b>-0.0357</b>    | <b>0.0027</b> | 145 ± 12   | 200 ± 20   | 176 ± 20    | 288 ± 42    |
| 218662_s_at | HCAP-G   | chromosome condensation protein G                        | 0.2099           | <b>-0.0134</b>    | <b>0.0298</b>    | -0.2702           | 0.0556        | 53 ± 6     | 80 ± 13    | 68 ± 17     | 107 ± 17    |

| Probe set   | Name      | Description                                               | NFT <sub>0</sub> | MMSE <sub>0</sub> | NFT <sub>1</sub> | MMSE <sub>1</sub> | ANOVA         | Cntrl      | Incipient  | Moderate   | Severe       |
|-------------|-----------|-----------------------------------------------------------|------------------|-------------------|------------------|-------------------|---------------|------------|------------|------------|--------------|
| 217965_s_at | HCNGP     | transcriptional regulator protein                         | <b>0.0073</b>    | <b>-0.0217</b>    | <b>0.0403</b>    | -0.4671           | <b>0.0494</b> | 306 ± 15   | 374 ± 52   | 394 ± 48   | 526 ± 88     |
| 212785_s_at | HDCMA18P  | HDCMA18P protein                                          | 0.6277           | <b>-0.0403</b>    | 0.3208           | <b>-0.0189</b>    | 0.2753        | 437 ± 37   | 520 ± 45   | 520 ± 41   | 530 ± 30     |
| 213537_at   | HLA-DPA1  | major histocompatibility complex, class II, DP alpha 1    | 0.1330           | <b>-0.0039</b>    | <b>0.0403</b>    | <b>-0.0453</b>    | <b>0.0316</b> | 115 ± 19   | 177 ± 30   | 218 ± 39   | 245 ± 31     |
| 207565_s_at | HLALS     | MHC, class I-like sequence                                | <b>0.0540</b>    | <b>-0.0034</b>    | 0.1439           | <b>-0.0397</b>    | <b>0.0099</b> | 56 ± 8     | 64 ± 11    | 59 ± 12    | 112 ± 16     |
| 203744_at   | HMGB3     | high-mobility group box 3                                 | 0.1438           | <b>-0.0269</b>    | <b>0.0253</b>    | <b>-0.0227</b>    | 0.1632        | 568 ± 20   | 585 ± 30   | 642 ± 25   | 697 ± 79     |
| 205600_x_at | HOXB5     | homeo box B5                                              | <b>0.0237</b>    | -0.0572           | <b>0.0509</b>    | <b>-0.0233</b>    | 0.0765        | 277 ± 24   | 379 ± 36   | 342 ± 31   | 461 ± 85     |
| 206194_at   | HOXC4     | homeo box C4                                              | <b>0.0040</b>    | <b>-0.0004</b>    | <b>0.0495</b>    | <b>-0.0181</b>    | <b>0.0030</b> | 153 ± 14   | 189 ± 20   | 167 ± 18   | 295 ± 46     |
| 203283_s_at | HS2ST1    | heparan sulfate 2-O-sulfotransferase 1                    | 0.1550           | <b>-0.0449</b>    | <b>0.0280</b>    | <b>-0.0483</b>    | 0.1457        | 182 ± 14   | 200 ± 27   | 245 ± 19   | 236 ± 25     |
| 217760_at   | HSA249128 | DIPB protein                                              | 0.3976           | <b>-0.0047</b>    | 0.3018           | <b>-0.0278</b>    | <b>0.0323</b> | 1139 ± 32  | 1173 ± 42  | 1158 ± 25  | 1397 ± 119   |
| 218826_at   | HSNOV1    | novel protein                                             | <b>0.0117</b>    | <b>-0.0068</b>    | <b>0.0375</b>    | <b>-0.0022</b>    | <b>0.0004</b> | 349 ± 28   | 544 ± 56   | 451 ± 31   | 590 ± 35     |
| 218936_s_at | HSPC128   | HSPC128 protein                                           | 0.0594           | <b>-0.0119</b>    | 0.3851           | <b>-0.0222</b>    | 0.1222        | 325 ± 11   | 348 ± 31   | 354 ± 28   | 434 ± 54     |
| 213645_at   | HSRTSBETA | rTS beta protein                                          | <b>0.0150</b>    | -0.2776           | <b>0.0081</b>    | 0.3794            | 0.3304        | 368 ± 48   | 511 ± 95   | 669 ± 156  | 688 ± 233    |
| 208360_s_at | HSU88895  | endog. retrovirus HD1, ORF1, ORF2, & putative envelope    | 0.4625           | <b>-0.0383</b>    | 0.0816           | <b>-0.0392</b>    | 0.2937        | 264 ± 28   | 302 ± 30   | 293 ± 30   | 372 ± 65     |
| 205956_x_at | HUMGT198A | GT198, complete ORF                                       | <b>0.0035</b>    | <b>-0.0230</b>    | <b>0.0304</b>    | -0.4651           | <b>0.0162</b> | 232 ± 15   | 335 ± 62   | 326 ± 26   | 402 ± 33     |
| 209292_at   | ID4       | inhibitor of DNA binding 4                                | 0.4504           | <b>-0.0427</b>    | 0.1727           | <b>-0.0110</b>    | 0.2324        | 918 ± 142  | 1154 ± 160 | 1429 ± 245 | 1321 ± 192   |
| 205058_at   | IDUA      | iduronidase, alpha-L-                                     | <b>0.0112</b>    | -0.0736           | 0.1242           | <b>-0.0002</b>    | 0.4207        | 136 ± 17   | 176 ± 24   | 178 ± 20   | 200 ± 48     |
| 214314_s_at | IF2       | translation initiation factor IF2                         | 0.0593           | <b>-0.0046</b>    | <b>0.0239</b>    | -0.1421           | 0.0879        | 149 ± 21   | 176 ± 29   | 212 ± 36   | 264 ± 38     |
| 214569_at   | IFNA5     | interferon, alpha 5                                       | 0.2400           | <b>-0.0137</b>    | <b>0.0216</b>    | <b>-0.0291</b>    | 0.0697        | 101 ± 10   | 117 ± 15   | 118 ± 13   | 175 ± 34     |
| 210354_at   | IFNG      | interferon, gamma                                         | 0.5036           | <b>-0.0139</b>    | <b>0.0368</b>    | <b>-0.0010</b>    | <b>0.0536</b> | 110 ± 11   | 154 ± 22   | 119 ± 16   | 189 ± 32     |
| 204912_at   | IL10RA    | interleukin 10 receptor, alpha                            | <b>0.0029</b>    | <b>0.0000</b>     | 0.0744           | <b>-0.0319</b>    | <b>0.0006</b> | 247 ± 18   | 309 ± 23   | 333 ± 32   | 473 ± 57     |
| 209575_at   | IL10RB    | interleukin 10 receptor, beta                             | <b>0.0476</b>    | <b>-0.0406</b>    | 0.0583           | <b>-0.0115</b>    | 0.1471        | 180 ± 17   | 244 ± 21   | 233 ± 28   | 269 ± 43     |
| 201887_at   | IL13RA1   | interleukin 13 receptor, alpha 1                          | 0.2656           | <b>-0.0087</b>    | <b>0.0103</b>    | -0.0713           | <b>0.0294</b> | 618 ± 64   | 815 ± 64   | 768 ± 66   | 918 ± 79     |
| 205707_at   | IL17R     | interleukin 17 receptor                                   | 0.4245           | <b>-0.0297</b>    | <b>0.0266</b>    | -0.2735           | 0.1405        | 427 ± 39   | 498 ± 53   | 540 ± 72   | 641 ± 77     |
| 206295_at   | IL18      | interleukin 18 (interferon-gamma-inducing factor)         | 0.2454           | <b>-0.0423</b>    | 0.1406           | <b>-0.0014</b>    | 0.3269        | 70 ± 13    | 88 ± 13    | 84 ± 10    | 109 ± 22     |
| 204116_at   | IL2RG     | interleukin 2 receptor, γ                                 | -0.8498          | <b>-0.0379</b>    | <b>0.0390</b>    | <b>-0.0105</b>    | 0.4319        | 338 ± 34   | 394 ± 33   | 428 ± 30   | 421 ± 68     |
| 205945_at   | IL6R      | interleukin 6 receptor                                    | 0.3942           | <b>-0.0099</b>    | <b>0.0431</b>    | -0.1237           | 0.0575        | 138 ± 14   | 157 ± 17   | 178 ± 15   | 204 ± 20     |
| 219843_at   | IPP       | intracisternal A particle-promoted polypeptide            | <b>0.0356</b>    | -0.0841           | <b>0.0191</b>    | -0.0551           | 0.1628        | 153 ± 22   | 226 ± 37   | 193 ± 14   | 241 ± 43     |
| 222126_at   | IRS3L     | insulin receptor substrate 3-like                         | 0.0826           | <b>-0.0055</b>    | <b>0.0235</b>    | <b>-0.0016</b>    | <b>0.0082</b> | 404 ± 19   | 573 ± 55   | 596 ± 59   | 611 ± 31     |
| 207191_s_at | ISLR      | immunoglobulin superfamily containing leucine-rich repeat | <b>0.0425</b>    | -0.2678           | <b>0.0411</b>    | <b>-0.0151</b>    | 0.3381        | 136 ± 15   | 197 ± 20   | 193 ± 37   | 212 ± 50     |
| 214660_at   | ITGA1     | integrin, alpha 1                                         | <b>0.0126</b>    | <b>-0.0056</b>    | 0.1753           | <b>-0.0072</b>    | <b>0.0405</b> | 17 ± 2     | 23 ± 5     | 22 ± 5     | 49 ± 15      |
| 201656_at   | ITGA6     | integrin, alpha 6                                         | 0.3613           | <b>-0.0391</b>    | 0.0840           | <b>-0.0130</b>    | 0.3150        | 369 ± 34   | 501 ± 75   | 508 ± 78   | 516 ± 77     |
| 216331_at   | ITGA7     | integrin, alpha 7                                         | 0.0848           | <b>-0.0186</b>    | <b>0.0047</b>    | 0.4410            | <b>0.0169</b> | 794 ± 44   | 1013 ± 116 | 1377 ± 137 | 1358 ± 228   |
| 214020_x_at | ITGB5     | integrin, beta 5                                          | 0.1007           | <b>-0.0029</b>    | 0.4578           | <b>-0.0295</b>    | 0.0715        | 301 ± 24   | 350 ± 54   | 414 ± 36   | 477 ± 75     |
| 207187_at   | JAK3      | Janus kinase 3 (a protein tyrosine kinase, leukocyte)     | 0.1097           | <b>-0.0064</b>    | 0.1080           | <b>-0.0339</b>    | 0.1091        | 400 ± 21   | 444 ± 30   | 438 ± 35   | 540 ± 66     |
| 37872_at    | JRK       | jerky homolog (mouse)                                     | 0.0757           | <b>-0.0002</b>    | 0.0915           | <b>-0.0121</b>    | <b>0.0076</b> | 283 ± 17   | 303 ± 17   | 339 ± 16   | 383 ± 26     |
| 203752_s_at | JUND      | jun D proto-oncogene                                      | <b>0.0006</b>    | <b>-0.0284</b>    | 0.4697           | <b>-0.0494</b>    | 0.1244        | 7987 ± 603 | 8307 ± 654 | 9983 ± 683 | 10792 ± 1603 |
| 220776_at   | KCNJ14    | K <sup>+</sup> inwardly-rectifying channel, J 14          | <b>0.0166</b>    | <b>-0.0011</b>    | <b>0.0401</b>    | <b>-0.0048</b>    | <b>0.0048</b> | 110 ± 6    | 136 ± 12   | 132 ± 12   | 239 ± 47     |
| 220727_at   | KCNK10    | potassium channel, subfamily K, member 10                 | <b>0.0043</b>    | <b>-0.0101</b>    | <b>0.0012</b>    | -0.1831           | <b>0.0120</b> | 126 ± 9    | 154 ± 21   | 153 ± 8    | 222 ± 33     |
| 219371_s_at | KLF2      | Kruppel-like factor 2 (lung)                              | 0.2745           | <b>-0.0500</b>    | <b>0.0070</b>    | -0.3375           | 0.0592        | 463 ± 36   | 681 ± 121  | 637 ± 46   | 800 ± 116    |

| Probe set   | Name      | Description                                            | NFT <sub>0</sub> | MMSE <sub>0</sub> | NFT <sub>1</sub> | MMSE <sub>1</sub> | ANOVA         | Cntrl      | Incipient  | Moderate   | Severe     |
|-------------|-----------|--------------------------------------------------------|------------------|-------------------|------------------|-------------------|---------------|------------|------------|------------|------------|
| 214715_x_at | KR18      | KRAB zinc finger protein KR18                          | <b>0.0463</b>    | <b>-0.0301</b>    | 0.0998           | <b>-0.0290</b>    | 0.1092        | 1839 ± 257 | 1919 ± 186 | 3117 ± 542 | 2720 ± 558 |
| 200914_x_at | KTN1      | kinectin 1 (kinesin receptor)                          | <b>0.0042</b>    | <b>-0.0029</b>    | <b>0.0276</b>    | -0.0678           | <b>0.0151</b> | 1603 ± 117 | 1988 ± 199 | 2350 ± 166 | 2475 ± 279 |
| 205116_at   | LAMA2     | laminin, a2                                            | <b>0.0478</b>    | <b>-0.0026</b>    | <b>0.0191</b>    | -0.0749           | <b>0.0315</b> | 114 ± 10   | 149 ± 20   | 142 ± 7    | 214 ± 42   |
| 202202_s_at | LAMA4     | laminin, alpha 4                                       | <b>0.0258</b>    | -0.1425           | <b>0.0166</b>    | -0.0851           | 0.2081        | 189 ± 23   | 243 ± 37   | 280 ± 26   | 251 ± 41   |
| 200771_at   | LAMC1     | laminin, gamma 1 (formerly LAMB2)                      | 0.1222           | <b>-0.0068</b>    | -0.2206          | <b>-0.0491</b>    | 0.2585        | 655 ± 58   | 659 ± 53   | 739 ± 48   | 831 ± 107  |
| 221558_s_at | LEF1      | lymphoid enhancer-binding factor 1                     | 0.0871           | <b>-0.0053</b>    | 0.3217           | <b>-0.0455</b>    | 0.1730        | 249 ± 14   | 266 ± 32   | 308 ± 26   | 330 ± 40   |
| 202193_at   | LIMK2     | LIM domain kinase 2                                    | <b>0.0058</b>    | <b>-0.0005</b>    | 0.3244           | <b>-0.0156</b>    | <b>0.0096</b> | 207 ± 22   | 238 ± 20   | 360 ± 64   | 402 ± 47   |
| 213779_at   | LOC129080 | putative emu1                                          | <b>0.0037</b>    | -0.1094           | <b>0.0041</b>    | -0.3719           | 0.2095        | 408 ± 27   | 537 ± 83   | 554 ± 41   | 642 ± 141  |
| 210389_x_at | LOC51174  | delta-tubulin                                          | <b>0.0002</b>    | <b>-0.0032</b>    | <b>0.0480</b>    | -0.2489           | <b>0.0040</b> | 137 ± 12   | 193 ± 19   | 211 ± 21   | 240 ± 21   |
| 219863_at   | LOC51191  | cyclin-E binding protein 1                             | 0.1006           | <b>0.0000</b>     | 0.0916           | <b>-0.0333</b>    | <b>0.0077</b> | 252 ± 17   | 323 ± 30   | 336 ± 23   | 467 ± 73   |
| 221999_at   | LOC51231  | VRK3 for vaccinia related kinase 3                     | <b>0.0139</b>    | <b>-0.0004</b>    | <b>0.0261</b>    | -0.2779           | <b>0.0000</b> | 330 ± 14   | 418 ± 42   | 369 ± 26   | 581 ± 24   |
| 207785_s_at | LOC51580  | H-2K binding factor-2                                  | 0.4535           | <b>-0.0452</b>    | -0.2753          | <b>-0.0126</b>    | 0.5700        | 1311 ± 84  | 1359 ± 130 | 1500 ± 64  | 1460 ± 157 |
| 202903_at   | LSM5      | U6 snRNA-associated Sm-like protein                    | <b>0.0173</b>    | -0.0619           | <b>0.0028</b>    | <b>-0.0512</b>    | <b>0.0217</b> | 109 ± 11   | 168 ± 20   | 162 ± 8    | 187 ± 30   |
| 220044_x_at | LUC7A     | cisplatin resistance-associated overexpressed protein  | 0.0825           | <b>-0.0013</b>    | -0.3827          | <b>-0.0459</b>    | <b>0.0087</b> | 1293 ± 69  | 1283 ± 114 | 1646 ± 48  | 1523 ± 98  |
| 210302_s_at | MAB21L2   | mab-21-like 2 (C. elegans)                             | <b>0.0025</b>    | <b>0.0000</b>     | 0.0734           | <b>-0.0369</b>    | <b>0.0001</b> | 145 ± 11   | 188 ± 9    | 197 ± 16   | 258 ± 21   |
| 210017_at   | MALT1     | mucosa associated lymphoid tissue translocation 1      | <b>0.0422</b>    | <b>-0.0071</b>    | -0.3718          | <b>-0.0078</b>    | 0.0655        | 101 ± 12   | 118 ± 17   | 142 ± 9    | 145 ± 12   |
| 213705_at   | MAT2A     | methionine adenosyltransferase II, alpha               | 0.1291           | <b>-0.0001</b>    | <b>0.0133</b>    | <b>-0.0184</b>    | <b>0.0038</b> | 316 ± 29   | 434 ± 58   | 490 ± 25   | 733 ± 137  |
| 202350_s_at | MATN2     | matrilin 2                                             | 0.1427           | <b>-0.0007</b>    | 0.0691           | <b>-0.0219</b>    | <b>0.0266</b> | 377 ± 45   | 508 ± 59   | 471 ± 46   | 634 ± 76   |
| 210136_at   | MBP       | myelin basic protein                                   | <b>0.0343</b>    | <b>-0.0383</b>    | <b>0.0285</b>    | -0.4138           | 0.2970        | 1624 ± 245 | 1962 ± 326 | 2352 ± 674 | 3195 ± 956 |
| 214057_at   | MCL1      | myeloid cell leukemia sequence 1 (BCL2-related)        | <b>0.0414</b>    | <b>-0.0009</b>    | <b>0.0519</b>    | <b>-0.0378</b>    | <b>0.0349</b> | 209 ± 16   | 232 ± 21   | 253 ± 29   | 314 ± 29   |
| 213761_at   | MDM1      | nuclear protein double minute 1                        | 0.2852           | <b>-0.0015</b>    | 0.0725           | <b>-0.0364</b>    | <b>0.0135</b> | 315 ± 13   | 386 ± 26   | 389 ± 21   | 418 ± 25   |
| 213816_s_at | MET       | met proto-oncogene (hepatocyte growth factor receptor) | <b>0.0087</b>    | -0.0686           | <b>0.0403</b>    | -0.2312           | 0.0995        | 136 ± 13   | 182 ± 30   | 168 ± 17   | 220 ± 32   |
| 203406_at   | MFAP1     | microfibrillar-associated protein 1                    | <b>0.0001</b>    | <b>-0.0001</b>    | <b>0.0005</b>    | <b>-0.0454</b>    | <b>0.0004</b> | 877 ± 21   | 956 ± 44   | 1096 ± 20  | 1111 ± 58  |
| 64408_s_at  | MGC4809   | serologically defined breast cancer antigen NY-BR-20   | <b>0.0268</b>    | -0.0786           | -0.4929          | <b>-0.0433</b>    | 0.2675        | 65 ± 9     | 64 ± 9     | 89 ± 17    | 92 ± 14    |
| 206426_at   | MLANA     | melan-A                                                | <b>0.0053</b>    | -0.0574           | <b>0.0085</b>    | -0.3347           | 0.2505        | 57 ± 6     | 72 ± 14    | 83 ± 10    | 102 ± 27   |
| 201976_s_at | MYO10     | myosin X                                               | 0.0988           | <b>-0.0457</b>    | <b>0.0290</b>    | -0.2051           | 0.1025        | 3064 ± 290 | 3944 ± 556 | 4474 ± 301 | 4214 ± 576 |
| 211916_s_at | MYO1A     | myosin IA                                              | <b>0.0123</b>    | <b>-0.0142</b>    | -0.3886          | <b>-0.0494</b>    | <b>0.0495</b> | 214 ± 13   | 229 ± 20   | 240 ± 13   | 314 ± 45   |
| 202926_at   | NAG       | neuroblastoma-amplified protein                        | <b>0.0038</b>    | -0.0877           | <b>0.0297</b>    | -0.1395           | 0.1210        | 589 ± 40   | 749 ± 55   | 715 ± 60   | 787 ± 89   |
| 204528_s_at | NAP1L1    | nucleosome assembly protein 1-like 1                   | <b>0.0216</b>    | <b>-0.0102</b>    | 0.3438           | <b>-0.0016</b>    | 0.1583        | 1207 ± 78  | 1335 ± 97  | 1497 ± 134 | 1493 ± 107 |
| 209061_at   | NCOA3     | nuclear receptor coactivator 3                         | 0.2199           | <b>-0.0442</b>    | 0.3014           | <b>-0.0053</b>    | 0.1038        | 166 ± 24   | 218 ± 19   | 226 ± 12   | 279 ± 54   |
| 202607_at   | NDST1     | N-deacetylase/N-sulfotransferase 1                     | 0.0605           | <b>-0.0342</b>    | -0.4743          | <b>-0.0392</b>    | <b>0.0542</b> | 499 ± 57   | 560 ± 55   | 761 ± 37   | 644 ± 102  |
| 203961_at   | NEBL      | nebullette                                             | <b>0.0496</b>    | <b>-0.0037</b>    | -0.4161          | <b>-0.0204</b>    | 0.0710        | 5126 ± 259 | 5476 ± 442 | 6672 ± 660 | 7214 ± 975 |
| 212530_at   | NEK7      | NIMA (never in mitosis gene a)-related kinase 7        | 0.0951           | <b>-0.0165</b>    | 0.3140           | <b>-0.0241</b>    | 0.2232        | 1295 ± 132 | 1424 ± 170 | 1790 ± 261 | 1687 ± 165 |
| 213298_at   | NFIC      | nuclear factor I/C                                     | <b>0.0026</b>    | <b>-0.0056</b>    | <b>0.0037</b>    | <b>-0.0541</b>    | <b>0.0127</b> | 126 ± 10   | 158 ± 14   | 180 ± 8    | 234 ± 40   |
| 215338_s_at | NKTR      | natural killer-tumor recognition sequence              | <b>0.0129</b>    | -0.1353           | <b>0.0301</b>    | -0.2544           | <b>0.0117</b> | 181 ± 13   | 225 ± 27   | 292 ± 21   | 234 ± 28   |
| 217844_at   | NLI-IF    | nuclear LIM interactor-interacting factor              | <b>0.0141</b>    | <b>-0.0102</b>    | <b>0.0314</b>    | <b>-0.0301</b>    | <b>0.0436</b> | 630 ± 82   | 791 ± 83   | 1116 ± 90  | 1117 ± 258 |
| 205204_at   | NMB       | neuromedin B                                           | <b>0.0007</b>    | <b>-0.0059</b>    | <b>0.0169</b>    | 0.4550            | <b>0.0383</b> | 432 ± 33   | 482 ± 62   | 492 ± 42   | 737 ± 139  |
| 200057_s_at | NONO      | non-POU domain containing, octamer-binding             | <b>0.0360</b>    | <b>-0.0029</b>    | -0.4987          | <b>-0.0379</b>    | <b>0.0445</b> | 3672 ± 99  | 3873 ± 104 | 4017 ± 165 | 4172 ± 110 |
| 205247_at   | NOTCH4    | Notch homolog 4 (Drosophila)                           | 0.1144           | <b>-0.0163</b>    | <b>0.0329</b>    | 0.4330            | <b>0.0348</b> | 302 ± 17   | 360 ± 40   | 367 ± 28   | 474 ± 62   |

Web Table 6 (6)

| Probe set   | Name    | Description                                             | NFT <sub>0</sub> | MMSE <sub>0</sub> | NFT <sub>1</sub> | MMSE <sub>1</sub> | ANOVA         | Cntrl      | Incipient   | Moderate    | Severe      |
|-------------|---------|---------------------------------------------------------|------------------|-------------------|------------------|-------------------|---------------|------------|-------------|-------------|-------------|
| 220316_at   | NPAS3   | basic-helix-loop-helix-PAS protein                      | 0.0759           | <b>-0.0001</b>    | <b>0.0020</b>    | -0.1486           | <b>0.0011</b> | 427 ± 16   | 554 ± 44    | 617 ± 17    | 796 ± 108   |
| 217802_s_at | NUCKS   | similar to rat nuclear ubiquitous casein kinase 2       | <b>0.0001</b>    | <b>-0.0002</b>    | <b>0.0099</b>    | -0.1530           | <b>0.0013</b> | 4406 ± 107 | 4549 ± 104  | 5193 ± 244  | 5660 ± 313  |
| 200747_s_at | NUMA1   | nuclear mitotic apparatus protein 1                     | <b>0.0008</b>    | <b>-0.0052</b>    | 0.2004           | <b>-0.0377</b>    | <b>0.0547</b> | 740 ± 72   | 879 ± 74    | 987 ± 66    | 1133 ± 170  |
| 203195_s_at | NUP98   | nucleoporin 98kDa                                       | <b>0.0044</b>    | <b>-0.0001</b>    | 0.1507           | <b>-0.0104</b>    | <b>0.0000</b> | 97 ± 10    | 154 ± 25    | 250 ± 12    | 233 ± 27    |
| 210797_s_at | OASL    | 2'-5'-oligoadenylate synthetase-like                    | 0.3167           | <b>-0.0139</b>    | 0.1112           | <b>-0.0072</b>    | 0.1729        | 282 ± 34   | 335 ± 19    | 332 ± 25    | 399 ± 55    |
| 205301_s_at | OGG1    | 8-oxoguanine DNA glycosylase                            | 0.1250           | <b>-0.0181</b>    | 0.1970           | <b>-0.0363</b>    | 0.0777        | 57 ± 7     | 71 ± 7      | 108 ± 20    | 103 ± 22    |
| 208735_s_at | OS4     | conserved gene amplified in osteosarcoma                | <b>0.0542</b>    | <b>-0.0290</b>    | <b>0.0126</b>    | 0.3074            | 0.0849        | 450 ± 25   | 483 ± 60    | 496 ± 27    | 609 ± 61    |
| 215399_s_at | OS-9    | amplified in osteosarcoma                               | <b>0.0037</b>    | -0.4339           | <b>0.0377</b>    | 0.2597            | 0.4182        | 355 ± 24   | 395 ± 47    | 437 ± 20    | 415 ± 56    |
| 218304_s_at | OSBPL11 | oxysterol binding protein-like 11                       | 0.2868           | <b>-0.0153</b>    | -0.3162          | <b>-0.0412</b>    | 0.2455        | 704 ± 69   | 837 ± 129   | 961 ± 110   | 993 ± 146   |
| 202553_s_at | P29     | GCIP-interacting protein p29                            | <b>0.0025</b>    | -0.0574           | 0.1144           | <b>-0.0131</b>    | <b>0.0550</b> | 998 ± 90   | 1164 ± 72   | 1308 ± 75   | 1189 ± 68   |
| 220402_at   | P53AIP1 | p53-regulated apoptosis-inducing protein 1              | 0.0912           | <b>-0.0004</b>    | 0.0885           | <b>-0.0401</b>    | <b>0.0000</b> | 47 ± 9     | 57 ± 7      | 43 ± 8      | 125 ± 16    |
| 208113_x_at | PABPC3  | poly(A) binding protein, cytoplasmic 3                  | <b>0.0287</b>    | -0.1967           | <b>0.0357</b>    | -0.0759           | 0.3436        | 2272 ± 174 | 2625 ± 405  | 2907 ± 234  | 2622 ± 145  |
| 205719_s_at | PAH     | phenylalanine hydroxylase                               | 0.4106           | <b>-0.0367</b>    | 0.1758           | <b>-0.0028</b>    | 0.3914        | 99 ± 13    | 120 ± 18    | 121 ± 8     | 128 ± 6     |
| 220355_s_at | PB1     | polybromo 1                                             | <b>0.0209</b>    | <b>-0.0348</b>    | <b>0.0362</b>    | <b>-0.0008</b>    | <b>0.0027</b> | 563 ± 20   | 639 ± 38    | 746 ± 32    | 650 ± 34    |
| 217739_s_at | PBEF    | pre-B-cell colony-enhancing factor                      | 0.5430           | <b>-0.0205</b>    | 0.3250           | <b>-0.0138</b>    | 0.2467        | 371 ± 34   | 411 ± 44    | 489 ± 58    | 499 ± 65    |
| 204476_s_at | PC      | pyruvate carboxylase                                    | <b>0.0001</b>    | <b>-0.0409</b>    | <b>0.0223</b>    | -0.4650           | 0.1148        | 501 ± 40   | 596 ± 65    | 695 ± 67    | 713 ± 92    |
| 203845_at   | PCAF    | p300/CBP-associated factor                              | 0.6531           | <b>-0.0359</b>    | 0.3825           | <b>-0.0295</b>    | <b>0.0263</b> | 1312 ± 103 | 1521 ± 167  | 2028 ± 200  | 1671 ± 164  |
| 217049_x_at | PCDH11Y | protocadherin 11 Y-linked                               | 0.1777           | <b>-0.0450</b>    | <b>0.0483</b>    | <b>-0.0071</b>    | 0.0645        | 112 ± 8    | 141 ± 21    | 125 ± 20    | 198 ± 36    |
| 204449_at   | PDCL    | phosducin-like                                          | <b>0.0431</b>    | -0.3051           | <b>0.0069</b>    | <b>-0.0113</b>    | <b>0.0421</b> | 175 ± 21   | 204 ± 11    | 271 ± 28    | 204 ± 28    |
| 206792_x_at | PDE4C   | phosphodiesterase 4C                                    | <b>0.0069</b>    | <b>-0.0180</b>    | <b>0.0220</b>    | -0.1432           | <b>0.0466</b> | 4935 ± 632 | 6755 ± 1121 | 9049 ± 1345 | 8316 ± 1212 |
| 216061_x_at | PDGFB   | platelet-derived growth factor β polypeptide            | 0.1198           | <b>-0.0065</b>    | <b>0.0075</b>    | <b>-0.0086</b>    | 0.1059        | 376 ± 20   | 423 ± 60    | 550 ± 46    | 531 ± 96    |
| 205137_x_at | PDZ-73  | PDZ-73 protein                                          | <b>0.0449</b>    | <b>0.0000</b>     | 0.1158           | <b>-0.0100</b>    | <b>0.0004</b> | 219 ± 34   | 300 ± 64    | 385 ± 32    | 565 ± 65    |
| 202861_at   | PER1    | period homolog 1 (Drosophila)                           | <b>0.0000</b>    | <b>-0.0099</b>    | 0.2052           | <b>-0.0479</b>    | <b>0.0365</b> | 271 ± 55   | 393 ± 44    | 479 ± 50    | 542 ± 107   |
| 203501_at   | PGCP    | plasma glutamate carboxypeptidase                       | 0.4277           | <b>-0.0302</b>    | -0.1570          | <b>-0.0239</b>    | 0.2750        | 430 ± 57   | 513 ± 66    | 603 ± 76    | 556 ± 64    |
| 218387_s_at | PGLS    | 6-phosphogluconolactonase                               | <b>0.0128</b>    | <b>-0.0074</b>    | <b>0.0406</b>    | 0.2988            | <b>0.0540</b> | 719 ± 96   | 803 ± 82    | 880 ± 93    | 1140 ± 147  |
| 209345_s_at | PI4KII  | phosphatidylinositol 4-kinase type II                   | <b>0.0394</b>    | -0.1836           | <b>0.0255</b>    | -0.1561           | 0.4015        | 784 ± 53   | 835 ± 60    | 828 ± 52    | 913 ± 46    |
| 213239_at   | PIBF1   | progesterone-induced blocking factor 1                  | 0.1800           | <b>-0.0210</b>    | 0.3313           | <b>-0.0049</b>    | <b>0.0412</b> | 126 ± 6    | 140 ± 13    | 132 ± 14    | 192 ± 29    |
| 206138_s_at | PIK4CB  | phosphatidylinositol 4-kinase, catalytic, β polypeptide | <b>0.0327</b>    | <b>-0.0035</b>    | -0.1265          | <b>-0.0494</b>    | 0.1078        | 1331 ± 78  | 1291 ± 88   | 1500 ± 89   | 1585 ± 101  |
| 205372_at   | PLAG1   | pleiomorphic adenoma gene 1                             | 0.0731           | <b>-0.0015</b>    | <b>0.0333</b>    | 0.2767            | <b>0.0049</b> | 132 ± 13   | 121 ± 7     | 168 ± 20    | 209 ± 19    |
| 209643_s_at | PLD2    | phospholipase D2                                        | <b>0.0072</b>    | <b>-0.0018</b>    | <b>0.0324</b>    | <b>-0.0437</b>    | <b>0.0098</b> | 332 ± 26   | 417 ± 33    | 506 ± 40    | 540 ± 73    |
| 202619_s_at | PLOD2   | procollagen-lysine, 2-oxoglutarate 5-dioxygenase 2      | 0.2114           | <b>-0.0253</b>    | -0.3160          | <b>-0.0328</b>    | 0.2518        | 251 ± 29   | 269 ± 40    | 267 ± 23    | 341 ± 39    |
| 208890_s_at | PLXNB2  | plexin B2                                               | <b>0.0023</b>    | <b>-0.0039</b>    | <b>0.0015</b>    | -0.1719           | <b>0.0193</b> | 557 ± 42   | 905 ± 169   | 1134 ± 148  | 1277 ± 242  |
| 211014_s_at | PML     | promyelocytic leukemia                                  | 0.1579           | <b>-0.0006</b>    | <b>0.0435</b>    | <b>-0.0359</b>    | <b>0.0090</b> | 323 ± 19   | 352 ± 20    | 353 ± 15    | 446 ± 39    |
| 219380_x_at | POLH    | polymerase (DNA directed), eta                          | <b>0.0059</b>    | <b>-0.0235</b>    | <b>0.0199</b>    | <b>-0.0327</b>    | 0.1005        | 40 ± 8     | 51 ± 11     | 70 ± 17     | 89 ± 20     |
| 203497_at   | PPARBP  | PPAR binding protein                                    | 0.0989           | <b>-0.0008</b>    | <b>0.0130</b>    | <b>-0.0248</b>    | <b>0.0219</b> | 219 ± 16   | 274 ± 16    | 287 ± 24    | 323 ± 33    |
| 208993_s_at | PPIG    | peptidyl-prolyl isomerase G (cyclophilin G)             | <b>0.0083</b>    | -0.5287           | <b>0.0029</b>    | -0.0878           | 0.3766        | 518 ± 51   | 638 ± 50    | 650 ± 52    | 628 ± 92    |
| 201494_at   | PRCP    | prolylcarboxypeptidase (angiotensinase C)               | 0.5735           | <b>-0.0345</b>    | -0.4344          | <b>-0.0348</b>    | 0.4317        | 1333 ± 123 | 1500 ± 109  | 1544 ± 168  | 1687 ± 201  |
| 204842_x_at | PRKAR2A | protein kinase, cAMP-dependent, regulatory, type II, α  | <b>0.0028</b>    | <b>-0.0302</b>    | <b>0.0249</b>    | -0.2060           | <b>0.0425</b> | 709 ± 64   | 984 ± 147   | 935 ± 68    | 1283 ± 234  |
| 204211_x_at | PRKR    | protein kinase, interferon-inducible d.s.RNA dependent  | <b>0.0103</b>    | <b>-0.0043</b>    | <b>0.0395</b>    | <b>-0.0064</b>    | <b>0.0251</b> | 246 ± 21   | 330 ± 33    | 325 ± 28    | 450 ± 78    |

Web Table 6 (7)

| Probe set   | Name     | Description                                                | NFT <sub>0</sub> | MMSE <sub>0</sub> | NFT <sub>1</sub> | MMSE <sub>1</sub> | ANOVA         | Cntrl      | Incipient  | Moderate    | Severe       |
|-------------|----------|------------------------------------------------------------|------------------|-------------------|------------------|-------------------|---------------|------------|------------|-------------|--------------|
| 205445_at   | PRL      | prolactin                                                  | 0.4642           | <b>-0.0011</b>    | <b>0.0380</b>    | <b>-0.0237</b>    | <b>0.0194</b> | 170 ± 7    | 198 ± 24   | 179 ± 5     | 252 ± 29     |
| 220696_at   | PRO0478  | PRO0478 protein                                            | 0.1663           | <b>-0.0464</b>    | <b>0.0283</b>    | <b>-0.0020</b>    | <b>0.0355</b> | 69 ± 12    | 90 ± 12    | 136 ± 21    | 92 ± 18      |
| 202126_at   | PRPF4B   | PRP4 pre-mRNA processing factor 4 homolog B (yeast)        | <b>0.0258</b>    | <b>-0.0201</b>    | <b>0.0247</b>    | -0.2297           | 0.0927        | 1002 ± 53  | 1076 ± 41  | 1159 ± 63   | 1199 ± 72    |
| 203399_x_at | PSG3     | pregnancy specific beta-1-glycoprotein 3                   | 0.2826           | <b>-0.0111</b>    | 0.1048           | <b>-0.0100</b>    | 0.2034        | 71 ± 9     | 82 ± 13    | 76 ± 15     | 111 ± 18     |
| 210702_s_at | PTGIS    | prostaglandin I2 (prostacyclin) synthase                   | <b>0.0487</b>    | <b>-0.0404</b>    | <b>0.0043</b>    | -0.1266           | 0.0582        | 54 ± 9     | 94 ± 13    | 88 ± 20     | 126 ± 27     |
| 205128_x_at | PTGS1    | prostaglandin-endoperoxide synthase 1                      | <b>0.0239</b>    | -0.0967           | <b>0.0116</b>    | -0.1446           | 0.1213        | 386 ± 39   | 521 ± 47   | 500 ± 62    | 571 ± 62     |
| 205911_at   | PTHR1    | parathyroid hormone receptor 1                             | <b>0.0004</b>    | <b>-0.0490</b>    | <b>0.0360</b>    | -0.4442           | 0.0721        | 329 ± 20   | 454 ± 74   | 514 ± 48    | 551 ± 100    |
| 201087_at   | PXN      | paxillin                                                   | <b>0.0233</b>    | <b>-0.0361</b>    | 0.1051           | <b>-0.0319</b>    | 0.2670        | 602 ± 53   | 649 ± 37   | 735 ± 81    | 780 ± 89     |
| 217846_at   | QARS     | glutamyl-tRNA synthetase                                   | <b>0.0059</b>    | <b>-0.0209</b>    | <b>0.0045</b>    | -0.1218           | 0.0880        | 1227 ± 65  | 1356 ± 76  | 1427 ± 89   | 1581 ± 148   |
| 212636_at   | QKI      | homolog of mouse quaking QKI                               | <b>0.0005</b>    | <b>-0.0010</b>    | <b>0.0054</b>    | <b>-0.0078</b>    | <b>0.0031</b> | 6635 ± 488 | 9010 ± 882 | 11099 ± 793 | 10982 ± 1262 |
| 220964_s_at | RAB1B    | RAB1B, member RAS oncogene family                          | <b>0.0197</b>    | -0.5264           | <b>0.0471</b>    | <b>-0.0233</b>    | 0.3043        | 814 ± 93   | 1064 ± 130 | 1187 ± 103  | 1010 ± 241   |
| 208730_x_at | RAB2     | RAB2, member RAS oncogene family                           | 0.0716           | <b>-0.0398</b>    | 0.0827           | <b>-0.0213</b>    | <b>0.0418</b> | 511 ± 45   | 627 ± 41   | 576 ± 78    | 870 ± 153    |
| 203223_at   | RAB5EP   | rabaptin-5                                                 | <b>0.0111</b>    | <b>-0.0026</b>    | 0.1192           | <b>-0.0265</b>    | <b>0.0280</b> | 64 ± 10    | 100 ± 14   | 97 ± 16     | 137 ± 22     |
| 204461_x_at | RAD1     | RAD1 homolog (S. pombe)                                    | <b>0.0219</b>    | -0.1051           | <b>0.0180</b>    | 0.2628            | 0.1006        | 349 ± 32   | 361 ± 58   | 481 ± 44    | 502 ± 72     |
| 218849_s_at | RAI      | RelA-associated inhibitor                                  | <b>0.0013</b>    | <b>-0.0004</b>    | <b>0.0538</b>    | <b>-0.0466</b>    | <b>0.0016</b> | 328 ± 32   | 451 ± 31   | 451 ± 43    | 703 ± 108    |
| 209285_s_at | RAP140   | KIAA1105 protein                                           | 0.0654           | <b>-0.0039</b>    | 0.1381           | <b>-0.0103</b>    | <b>0.0547</b> | 918 ± 67   | 1160 ± 142 | 1252 ± 71   | 1279 ± 119   |
| 219214_s_at | RBAK     | RB-associated KRAB repressor                               | <b>0.0374</b>    | -0.3075           | <b>0.0094</b>    | -0.4507           | 0.1300        | 117 ± 10   | 188 ± 18   | 149 ± 27    | 181 ± 34     |
| 205062_x_at | RBBP1    | retinoblastoma binding protein 1                           | <b>0.0209</b>    | -0.2634           | <b>0.0245</b>    | 0.3884            | 0.3650        | 223 ± 15   | 230 ± 18   | 260 ± 16    | 258 ± 24     |
| 205169_at   | RBBP5    | retinoblastoma binding protein 5                           | <b>0.0463</b>    | -0.3678           | -0.3349          | <b>-0.0385</b>    | 0.7640        | 165 ± 13   | 176 ± 18   | 179 ± 25    | 196 ± 27     |
| 212781_at   | RBBP6    | retinoblastoma binding protein 6                           | <b>0.0095</b>    | -0.2117           | <b>0.0381</b>    | -0.3574           | 0.2409        | 398 ± 32   | 464 ± 60   | 506 ± 27    | 476 ± 38     |
| 205296_at   | RBL1     | retinoblastoma-like 1 (p107)                               | <b>0.0004</b>    | <b>-0.0027</b>    | <b>0.0106</b>    | <b>-0.0012</b>    | <b>0.0095</b> | 41 ± 6     | 77 ± 11    | 99 ± 10     | 109 ± 25     |
| 213852_at   | RBM8A    | RNA binding motif protein 8A                               | -0.9563          | <b>-0.0198</b>    | <b>0.0006</b>    | -0.1022           | <b>0.0384</b> | 1490 ± 72  | 1804 ± 46  | 1806 ± 80   | 1888 ± 173   |
| 219382_at   | RBT1     | RPA-binding trans-activator                                | <b>0.0045</b>    | <b>-0.0001</b>    | 0.2426           | <b>-0.0062</b>    | <b>0.0014</b> | 287 ± 24   | 334 ± 12   | 346 ± 20    | 478 ± 55     |
| 207525_s_at | RGS19IP1 | regulator of G-protein signalling 19 interacting protein 1 | <b>0.0238</b>    | -0.1713           | <b>0.0105</b>    | -0.4184           | 0.2236        | 885 ± 24   | 1039 ± 77  | 1068 ± 64   | 1157 ± 163   |
| 206518_s_at | RGS9     | regulator of G-protein signalling 9                        | <b>0.0317</b>    | -0.2796           | <b>0.0287</b>    | -0.4574           | 0.5473        | 88 ± 6     | 110 ± 11   | 107 ± 23    | 120 ± 19     |
| 218076_s_at | RICH1    | homolog of rat nadrin                                      | <b>0.0152</b>    | <b>-0.0003</b>    | 0.2587           | <b>-0.0162</b>    | <b>0.0030</b> | 536 ± 39   | 621 ± 47   | 614 ± 49    | 887 ± 99     |
| 219312_s_at | RINZF    | zinc finger protein RINZF                                  | <b>0.0077</b>    | <b>-0.0001</b>    | <b>0.0259</b>    | <b>-0.0048</b>    | <b>0.0024</b> | 53 ± 4     | 64 ± 9     | 87 ± 9      | 92 ± 5       |
| 210524_x_at | RNAHP    | RNA helicase-related protein                               | 0.4991           | <b>-0.0261</b>    | 0.3426           | <b>-0.0369</b>    | 0.0738        | 3327 ± 296 | 4122 ± 268 | 3837 ± 200  | 5610 ± 1181  |
| 217984_at   | RNASE6PL | ribonuclease 6 precursor                                   | 0.7632           | <b>-0.0432</b>    | 0.0616           | <b>-0.0270</b>    | <b>0.0356</b> | 1671 ± 133 | 2260 ± 119 | 1887 ± 199  | 2454 ± 283   |
| 203022_at   | RNASEH2A | ribonuclease H2, large subunit                             | 0.0821           | <b>-0.0344</b>    | <b>0.0285</b>    | -0.3617           | <b>0.0019</b> | 262 ± 18   | 311 ± 37   | 247 ± 7     | 380 ± 13     |
| 211387_x_at | RNGTT    | RNA guanylyltransferase and 5'-phosphatase                 | 0.1952           | <b>-0.0283</b>    | 0.0856           | <b>-0.0485</b>    | 0.2043        | 235 ± 25   | 249 ± 32   | 336 ± 40    | 338 ± 69     |
| 210230_at   | RNU2     | RNA, U2 small nuclear                                      | <b>0.0326</b>    | -0.1111           | <b>0.0421</b>    | -0.3610           | 0.4191        | 164 ± 45   | 273 ± 83   | 334 ± 95    | 419 ± 194    |
| 214697_s_at | ROD1     | ROD1 regulator of differentiation 1 (S. pombe)             | <b>0.0344</b>    | -0.1326           | <b>0.0389</b>    | -0.1794           | 0.4233        | 63 ± 8     | 76 ± 12    | 67 ± 14     | 92 ± 17      |
| 206169_x_at | RoXaN    | ubiquitous tetratricopeptide containing protein RoXaN      | <b>0.0425</b>    | -0.0857           | <b>0.0190</b>    | -0.2736           | 0.1373        | 266 ± 33   | 380 ± 84   | 450 ± 54    | 399 ± 60     |
| 212933_x_at | RPL13    | ribosomal protein L13                                      | <b>0.0008</b>    | <b>-0.0258</b>    | <b>0.0261</b>    | 0.3873            | 0.0595        | 7513 ± 381 | 8578 ± 982 | 9468 ± 458  | 10087 ± 800  |
| 220113_x_at | Rpo1-2   | similar to DNA-directed RNA polymerase I (135 kDa)         | 0.0667           | <b>-0.0032</b>    | 0.0672           | <b>-0.0129</b>    | <b>0.0427</b> | 902 ± 86   | 997 ± 95   | 1427 ± 189  | 1444 ± 235   |
| 214001_x_at | RPS10    | ribosomal protein S10                                      | <b>0.0045</b>    | <b>-0.0073</b>    | 0.0694           | <b>-0.0138</b>    | <b>0.0169</b> | 227 ± 34   | 364 ± 52   | 319 ± 29    | 477 ± 82     |
| 216994_s_at | RUNX2    | runt-related transcription factor 2                        | 0.0766           | <b>-0.0420</b>    | 0.2358           | <b>-0.0082</b>    | 0.1172        | 103 ± 15   | 136 ± 21   | 122 ± 20    | 181 ± 34     |
| 209148_at   | RXRB     | retinoid X receptor, beta                                  | <b>0.0056</b>    | -0.3866           | <b>0.0000</b>    | -0.2507           | 0.1774        | 859 ± 39   | 981 ± 58   | 1037 ± 51   | 975 ± 90     |



| Probe set   | Name    | Description                                              | NFT <sub>0</sub> | MMSE <sub>0</sub> | NFT <sub>1</sub> | MMSE <sub>1</sub> | ANOVA         | Cntrl      | Incipient  | Moderate   | Severe     |
|-------------|---------|----------------------------------------------------------|------------------|-------------------|------------------|-------------------|---------------|------------|------------|------------|------------|
| 203186_s_at | S100A4  | S100 calcium binding protein A4                          | 0.2738           | <b>-0.0267</b>    | 0.4680           | <b>-0.0031</b>    | 0.2427        | 176 ± 49   | 270 ± 80   | 312 ± 62   | 386 ± 93   |
| 203227_s_at | SAS     | sarcoma amplified sequence                               | 0.1117           | <b>-0.0446</b>    | <b>0.0468</b>    | <b>-0.0322</b>    | 0.1945        | 1098 ± 106 | 1315 ± 150 | 1433 ± 99  | 1431 ± 159 |
| 59705_at    | SCLY    | putative selenocysteine lyase                            | 0.1838           | <b>-0.0444</b>    | <b>0.0003</b>    | -0.2152           | <b>0.0233</b> | 108 ± 6    | 139 ± 12   | 118 ± 12   | 151 ± 10   |
| 221621_at   | SEC14L1 | SEC14-like 1 (S. cerevisiae)                             | 0.2649           | <b>-0.0188</b>    | <b>0.0533</b>    | <b>-0.0364</b>    | 0.0882        | 135 ± 14   | 141 ± 10   | 140 ± 11   | 196 ± 31   |
| 201914_s_at | SEC63L  | SEC63 protein                                            | 0.0650           | <b>-0.0238</b>    | <b>0.0097</b>    | -0.4574           | <b>0.0479</b> | 230 ± 6    | 244 ± 25   | 292 ± 12   | 322 ± 42   |
| 203071_at   | SEMA3B  | semaphorin 3B                                            | <b>0.0018</b>    | <b>-0.0242</b>    | <b>0.0215</b>    | 0.2637            | <b>0.0544</b> | 472 ± 63   | 647 ± 128  | 701 ± 107  | 1161 ± 327 |
| 213048_s_at | SET     | SET translocation (myeloid leukemia-associated)          | <b>0.0357</b>    | <b>-0.0450</b>    | 0.2813           | <b>-0.0092</b>    | 0.2526        | 2167 ± 202 | 2368 ± 346 | 2853 ± 265 | 2679 ± 214 |
| 33322_i_at  | SFN     | stratifin                                                | <b>0.0105</b>    | <b>-0.0004</b>    | 0.2461           | <b>-0.0059</b>    | <b>0.0000</b> | 949 ± 44   | 1154 ± 24  | 1026 ± 46  | 1571 ± 140 |
| 202035_s_at | SFRP1   | secreted frizzled-related protein 1                      | <b>0.0007</b>    | <b>-0.0031</b>    | <b>0.0197</b>    | <b>-0.0105</b>    | <b>0.0265</b> | 47 ± 5     | 70 ± 8     | 71 ± 6     | 95 ± 19    |
| 201739_at   | SGK     | serum/glucocorticoid regulated kinase                    | 0.5440           | <b>-0.0260</b>    | -0.2537          | <b>-0.0234</b>    | 0.2301        | 3269 ± 434 | 3649 ± 399 | 4770 ± 682 | 4333 ± 684 |
| 220357_s_at | SGK2    | serum/glucocorticoid regulated kinase 2                  | 0.1788           | <b>-0.0397</b>    | <b>0.0204</b>    | 0.4107            | 0.0981        | 263 ± 11   | 335 ± 55   | 304 ± 26   | 400 ± 55   |
| 221519_at   | SHFM3   | split hand/foot malformation (ectrodactyly) type 3       | <b>0.0116</b>    | <b>-0.0068</b>    | <b>0.0149</b>    | -0.1847           | <b>0.0400</b> | 1267 ± 89  | 1570 ± 221 | 1781 ± 166 | 1963 ± 217 |
| 220937_s_at | SIAT7D  | sialyltransferase 7D                                     | 0.4560           | <b>-0.0035</b>    | <b>0.0278</b>    | <b>-0.0050</b>    | 0.0731        | 99 ± 8     | 109 ± 11   | 112 ± 7    | 130 ± 6    |
| 202782_s_at | SKIP    | skeletal muscle and kidney enriched inositol phosphatase | 0.6078           | <b>-0.0005</b>    | <b>0.0337</b>    | -0.0870           | <b>0.0078</b> | 568 ± 24   | 568 ± 35   | 575 ± 36   | 720 ± 25   |
| 206181_at   | SLAM    | signaling lymphocytic activation molecule                | 0.2031           | <b>-0.0004</b>    | <b>0.0027</b>    | -0.1306           | <b>0.0083</b> | 86 ± 8     | 127 ± 17   | 125 ± 11   | 164 ± 20   |
| 215274_at   | SLC12A3 | solute carrier family 12 member 3                        | 0.1475           | <b>-0.0065</b>    | 0.2175           | <b>-0.0172</b>    | <b>0.0233</b> | 140 ± 14   | 174 ± 11   | 177 ± 25   | 250 ± 39   |
| 205856_at   | SLC14A1 | solute carrier family 14 member 1                        | <b>0.0048</b>    | <b>-0.0001</b>    | <b>0.0407</b>    | -0.4844           | <b>0.0056</b> | 430 ± 69   | 517 ± 38   | 701 ± 91   | 1329 ± 326 |
| 211576_s_at | SLC19A1 | solute carrier family 19 member 1                        | <b>0.0195</b>    | <b>0.0000</b>     | <b>0.0320</b>    | <b>-0.0004</b>    | <b>0.0007</b> | 209 ± 19   | 287 ± 25   | 344 ± 26   | 426 ± 52   |
| 209865_at   | SLC35A3 | solute carrier family 35 member 3                        | <b>0.0515</b>    | <b>-0.0134</b>    | <b>0.0066</b>    | <b>-0.0023</b>    | <b>0.0002</b> | 78 ± 7     | 158 ± 10   | 140 ± 13   | 156 ± 15   |
| 201073_s_at | SMARCC1 | actin dependent regulator of chromatin c1                | <b>0.0162</b>    | -0.1204           | -0.2783          | <b>-0.0310</b>    | 0.4058        | 248 ± 36   | 293 ± 41   | 338 ± 19   | 319 ± 62   |
| 201320_at   | SMARCC2 | actin dependent regulator of chromatin c2                | <b>0.0011</b>    | -0.0747           | 0.3060           | <b>-0.0167</b>    | <b>0.0463</b> | 932 ± 107  | 1146 ± 57  | 1502 ± 98  | 1293 ± 259 |
| 212152_x_at | SMARCF1 | actin dependent regulator of chromatin f1                | <b>0.0206</b>    | <b>-0.0483</b>    | 0.2636           | <b>-0.0423</b>    | <b>0.0443</b> | 1942 ± 116 | 2278 ± 95  | 2366 ± 123 | 2341 ± 130 |
| 201589_at   | SMC1L1  | SMC1 structural maintenance of chromosomes 1-like 1      | 0.3775           | <b>-0.0049</b>    | -0.2678          | <b>-0.0381</b>    | 0.1786        | 620 ± 69   | 730 ± 100  | 824 ± 99   | 873 ± 78   |
| 207474_at   | SNRK    | SNF-1 related kinase                                     | 0.6988           | <b>-0.0487</b>    | 0.0826           | <b>-0.0033</b>    | 0.3816        | 60 ± 12    | 79 ± 12    | 76 ± 10    | 98 ± 26    |
| 220140_s_at | SNX11   | sorting nexin 11                                         | <b>0.0211</b>    | <b>-0.0482</b>    | <b>0.0089</b>    | -0.2493           | <b>0.0174</b> | 436 ± 36   | 594 ± 52   | 537 ± 52   | 646 ± 34   |
| 219793_at   | SNX16   | sorting nexin 16                                         | <b>0.0177</b>    | -0.0954           | 0.3075           | <b>-0.0032</b>    | 0.3081        | 72 ± 8     | 89 ± 14    | 101 ± 8    | 97 ± 16    |
| 213168_at   | SP3     | Sp3 transcription factor                                 | 0.4829           | <b>-0.0194</b>    | -0.3456          | <b>-0.0029</b>    | 0.1453        | 1062 ± 49  | 1073 ± 103 | 1305 ± 74  | 1185 ± 103 |
| 210117_at   | SPAG1   | sperm associated antigen 1                               | <b>0.0113</b>    | <b>0.0000</b>     | <b>0.0028</b>    | -0.0951           | <b>0.0005</b> | 108 ± 9    | 143 ± 21   | 142 ± 13   | 215 ± 18   |
| 205861_at   | SPIB    | Spi-B transcription factor (Spi-1/PU.1 related)          | <b>0.0352</b>    | <b>-0.0016</b>    | -0.4522          | <b>-0.0102</b>    | <b>0.0071</b> | 145 ± 14   | 150 ± 23   | 153 ± 16   | 241 ± 29   |
| 214072_x_at | SPUF    | secreted protein of unknown function                     | 0.5587           | <b>-0.0258</b>    | <b>0.0221</b>    | <b>-0.0119</b>    | 0.0605        | 260 ± 12   | 331 ± 28   | 294 ± 19   | 340 ± 27   |
| 202308_at   | SREBF1  | sterol regulatory element binding transcription factor 1 | <b>0.0157</b>    | <b>-0.0249</b>    | <b>0.0002</b>    | -0.1787           | <b>0.0319</b> | 526 ± 42   | 967 ± 130  | 858 ± 105  | 1196 ± 268 |
| 203181_x_at | SRPK2   | SFRS protein kinase 2                                    | <b>0.0024</b>    | <b>-0.0078</b>    | 0.2557           | <b>-0.0211</b>    | <b>0.0249</b> | 653 ± 49   | 780 ± 42   | 898 ± 72   | 902 ± 75   |
| 202506_at   | SSFA2   | sperm specific antigen 2                                 | <b>0.0486</b>    | <b>-0.0010</b>    | 0.4770           | <b>-0.0126</b>    | <b>0.0542</b> | 893 ± 105  | 1059 ± 103 | 1376 ± 188 | 1419 ± 174 |
| 221753_at   | SSH1    | slingshot 1                                              | 0.0640           | <b>-0.0177</b>    | 0.1460           | <b>-0.0289</b>    | 0.0711        | 355 ± 25   | 388 ± 18   | 427 ± 31   | 479 ± 50   |
| 51192_at    | SSH-3   | slingshot 3                                              | <b>0.0014</b>    | <b>-0.0009</b>    | <b>0.0268</b>    | -0.3388           | <b>0.0044</b> | 291 ± 21   | 370 ± 27   | 393 ± 23   | 619 ± 115  |
| 204964_s_at | SSPN    | sarcospan (Kras oncogene-associated gene)                | 0.1982           | <b>-0.0037</b>    | 0.3021           | <b>-0.0074</b>    | <b>0.0230</b> | 285 ± 39   | 362 ± 66   | 426 ± 51   | 576 ± 98   |
| 200652_at   | SSR2    | signal sequence receptor, β                              | <b>0.0403</b>    | -0.0640           | <b>0.0499</b>    | -0.2850           | 0.0660        | 1023 ± 47  | 1151 ± 63  | 1115 ± 26  | 1269 ± 101 |
| 209023_s_at | STAG2   | stromal antigen 2                                        | <b>0.0027</b>    | <b>-0.0085</b>    | 0.3459           | <b>-0.0066</b>    | <b>0.0240</b> | 506 ± 61   | 644 ± 21   | 837 ± 75   | 757 ± 122  |
| 206546_at   | SYCP2   | synaptonemal complex protein 2                           | <b>0.0032</b>    | -0.0905           | <b>0.0001</b>    | -0.0670           | 0.2322        | 32 ± 3     | 45 ± 7     | 53 ± 7     | 55 ± 15    |

| Probe set   | Name      | Description                                               | NFT <sub>0</sub> | MMSE <sub>0</sub> | NFT <sub>1</sub> | MMSE <sub>1</sub> | ANOVA         | Cntrl      | Incipient  | Moderate   | Severe     |
|-------------|-----------|-----------------------------------------------------------|------------------|-------------------|------------------|-------------------|---------------|------------|------------|------------|------------|
| 221276_s_at | SYNCOILIN | intermediate filament protein syncoilin                   | <b>0.0021</b>    | <b>-0.0021</b>    | 0.3414           | <b>-0.0113</b>    | <b>0.0160</b> | 119 ± 12   | 126 ± 22   | 165 ± 21   | 198 ± 18   |
| 217437_s_at | TACC1     | transforming, acidic coiled-coil containing protein 1     | 0.2180           | <b>-0.0049</b>    | <b>0.0210</b>    | -0.2360           | 0.1797        | 458 ± 23   | 501 ± 27   | 555 ± 54   | 612 ± 79   |
| 204877_s_at | TAO1      | thousand and one amino acid protein kinase                | 0.6842           | <b>-0.0399</b>    | <b>0.0067</b>    | 0.3208            | <b>0.0183</b> | 114 ± 10   | 122 ± 9    | 97 ± 7     | 180 ± 33   |
| 202133_at   | TAZ       | transcriptional co-activator with PDZ-binding motif (TAZ) | 0.0666           | <b>-0.0279</b>    | 0.1714           | <b>-0.0424</b>    | <b>0.0029</b> | 475 ± 84   | 634 ± 95   | 1340 ± 265 | 912 ± 106  |
| 201813_s_at | TBC1D5    | TBC1 domain family, member 5                              | <b>0.0284</b>    | <b>-0.0129</b>    | <b>0.0340</b>    | <b>-0.0342</b>    | <b>0.0431</b> | 776 ± 19   | 890 ± 46   | 925 ± 74   | 1062 ± 103 |
| 207554_x_at | TBXA2R    | thromboxane A2 receptor                                   | 0.3649           | <b>-0.0094</b>    | <b>0.0037</b>    | -0.1471           | <b>0.0080</b> | 171 ± 19   | 203 ± 20   | 171 ± 21   | 284 ± 35   |
| 212122_at   | TC10      | ras-like protein TC10                                     | <b>0.0055</b>    | <b>-0.0006</b>    | 0.0599           | <b>-0.0001</b>    | <b>0.0012</b> | 154 ± 17   | 247 ± 26   | 292 ± 20   | 280 ± 36   |
| 209153_s_at | TCF3      | transcription factor 3                                    | <b>0.0003</b>    | <b>-0.0005</b>    | 0.1557           | <b>-0.0216</b>    | <b>0.0069</b> | 224 ± 32   | 293 ± 34   | 438 ± 66   | 468 ± 72   |
| 204043_at   | TCN2      | transcobalamin II; macrocytic anemia                      | 0.4467           | <b>-0.0281</b>    | <b>0.0083</b>    | <b>-0.0053</b>    | 0.0877        | 239 ± 16   | 320 ± 30   | 293 ± 32   | 345 ± 41   |
| 202384_s_at | TCOF1     | Treacher Collins-Franceschetti syndrome 1                 | <b>0.0040</b>    | -0.1318           | 0.4932           | <b>-0.0009</b>    | 0.0595        | 150 ± 14   | 177 ± 18   | 268 ± 38   | 209 ± 44   |
| 201737_s_at | TEB4      | similar to S. cerevisiae SSM4                             | <b>0.0373</b>    | <b>-0.0279</b>    | 0.2946           | <b>-0.0212</b>    | 0.0551        | 1927 ± 111 | 2131 ± 127 | 2717 ± 277 | 2452 ± 245 |
| 217853_at   | TEM6      | tumor endothelial marker 6                                | 0.1228           | <b>-0.0027</b>    | <b>0.0146</b>    | -0.2218           | <b>0.0210</b> | 2462 ± 159 | 2999 ± 448 | 4169 ± 468 | 4407 ± 725 |
| 204731_at   | TGFBR3    | transforming growth factor, $\beta$ receptor III          | <b>0.0048</b>    | <b>-0.0001</b>    | 0.3427           | <b>-0.0168</b>    | <b>0.0091</b> | 339 ± 33   | 413 ± 40   | 512 ± 66   | 630 ± 87   |
| 208104_s_at | THG-1     | TSC-22-like                                               | <b>0.0367</b>    | <b>-0.0213</b>    | <b>0.0196</b>    | <b>-0.0480</b>    | <b>0.0386</b> | 730 ± 59   | 968 ± 139  | 1231 ± 136 | 1097 ± 142 |
| 222122_s_at | THO2      | Tho2                                                      | <b>0.0404</b>    | -0.0989           | -0.4113          | <b>-0.0364</b>    | 0.2425        | 398 ± 39   | 377 ± 36   | 369 ± 29   | 470 ± 38   |
| 209154_at   | TIP-1     | Tax interaction protein 1                                 | <b>0.0516</b>    | <b>-0.0025</b>    | <b>0.0013</b>    | -0.0847           | <b>0.0353</b> | 1652 ± 192 | 2510 ± 446 | 2896 ± 347 | 3486 ± 649 |
| 217367_s_at | TIX1      | triple homeobox 1                                         | <b>0.0000</b>    | <b>0.0000</b>     | <b>0.0370</b>    | <b>-0.0144</b>    | <b>0.0001</b> | 511 ± 47   | 593 ± 47   | 761 ± 57   | 913 ± 74   |
| 210176_at   | TLR1      | toll-like receptor 1                                      | 0.0766           | <b>-0.0018</b>    | -0.3761          | <b>-0.0390</b>    | <b>0.0162</b> | 71 ± 9     | 93 ± 16    | 100 ± 4    | 120 ± 7    |
| 217974_at   | TM7SF3    | seven transmembrane protein TM7SF3                        | -0.8483          | <b>-0.0293</b>    | -0.4844          | <b>-0.0116</b>    | 0.4008        | 159 ± 16   | 146 ± 22   | 164 ± 19   | 193 ± 19   |
| 221882_s_at | TMEM8     | transmembrane protein 8                                   | <b>0.0232</b>    | -0.5294           | <b>0.0337</b>    | -0.4415           | 0.5615        | 147 ± 13   | 174 ± 33   | 198 ± 35   | 227 ± 69   |
| 201645_at   | TNC       | tenascin C (hexabrachion)                                 | 0.2291           | <b>-0.0475</b>    | <b>0.0459</b>    | -0.4827           | 0.0633        | 231 ± 46   | 284 ± 46   | 479 ± 100  | 391 ± 35   |
| 204932_at   | TNFRSF11B | TNF receptor superfamily, member 11b                      | <b>0.0240</b>    | <b>-0.0018</b>    | <b>0.0407</b>    | -0.1543           | <b>0.0031</b> | 48 ± 4     | 59 ± 6     | 74 ± 12    | 109 ± 16   |
| 207536_s_at | TNFRSF9   | tumor necrosis factor receptor superfamily, member 9      | <b>0.0028</b>    | <b>-0.0428</b>    | <b>0.0490</b>    | 0.4553            | <b>0.0101</b> | 116 ± 8    | 173 ± 26   | 146 ± 7    | 239 ± 42   |
| 217931_at   | TNRC5     | trinucleotide repeat containing 5                         | <b>0.0064</b>    | <b>-0.0369</b>    | <b>0.0095</b>    | -0.1251           | 0.0788        | 237 ± 16   | 312 ± 37   | 308 ± 23   | 403 ± 75   |
| 216333_x_at | TNXB      | tenascin XB                                               | <b>0.0002</b>    | <b>-0.0121</b>    | <b>0.0109</b>    | <b>-0.0060</b>    | <b>0.0003</b> | 163 ± 24   | 236 ± 47   | 451 ± 47   | 332 ± 55   |
| 204071_s_at | TP53BPL   | tumor protein p53-binding protein                         | <b>0.0054</b>    | <b>-0.0199</b>    | <b>0.0400</b>    | -0.1030           | 0.0925        | 233 ± 9    | 264 ± 22   | 270 ± 29   | 324 ± 31   |
| 201691_s_at | TPD52     | tumor protein D52                                         | <b>0.0017</b>    | <b>-0.0030</b>    | <b>0.0206</b>    | 0.4724            | <b>0.0047</b> | 222 ± 19   | 263 ± 17   | 294 ± 28   | 362 ± 35   |
| 220865_s_at | TPT       | trans-prenyltransferase                                   | 0.2911           | <b>-0.0165</b>    | <b>0.0521</b>    | <b>-0.0410</b>    | 0.0691        | 264 ± 21   | 292 ± 19   | 278 ± 34   | 362 ± 27   |
| 203568_s_at | TRIM38    | tripartite motif-containing 38                            | 0.3111           | <b>-0.0378</b>    | <b>0.0073</b>    | <b>-0.0026</b>    | 0.3079        | 202 ± 19   | 264 ± 14   | 262 ± 41   | 292 ± 53   |
| 213968_at   | TSPAN-5   | tetraspan 5                                               | <b>0.0358</b>    | <b>-0.0168</b>    | <b>0.0430</b>    | <b>-0.0235</b>    | <b>0.0331</b> | 82 ± 12    | 115 ± 12   | 110 ± 25   | 187 ± 40   |
| 208195_at   | TTN       | titin                                                     | <b>0.0050</b>    | <b>0.0000</b>     | <b>0.0059</b>    | <b>-0.0187</b>    | <b>0.0001</b> | 124 ± 12   | 165 ± 19   | 168 ± 18   | 286 ± 32   |
| 211460_at   | TTY9      | testis-specific transcript, Y-linked 9                    | <b>0.0363</b>    | -0.1631           | <b>0.0267</b>    | -0.4758           | 0.1257        | 133 ± 11   | 195 ± 45   | 155 ± 12   | 232 ± 44   |
| 221304_at   | UGT1A     | UDP glycosyltransferase 1 family, polypeptide A cluster   | 0.2831           | <b>-0.0213</b>    | <b>0.0476</b>    | -0.1752           | <b>0.0113</b> | 74 ± 9     | 88 ± 8     | 68 ± 7     | 123 ± 18   |
| 206094_x_at | UGT1A6    | UDP glycosyltransferase 1 family, polypeptide A6          | 0.0845           | <b>-0.0153</b>    | <b>0.0327</b>    | -0.4902           | <b>0.0146</b> | 200 ± 12   | 237 ± 37   | 228 ± 29   | 336 ± 33   |
| 208971_at   | UROD      | uroporphyrinogen decarboxylase                            | <b>0.0146</b>    | -0.2858           | 0.0884           | <b>-0.0153</b>    | 0.3630        | 373 ± 26   | 416 ± 32   | 464 ± 23   | 441 ± 68   |
| 202413_s_at | USP1      | ubiquitin specific protease 1                             | <b>0.0362</b>    | <b>-0.0028</b>    | 0.2163           | <b>-0.0304</b>    | <b>0.0357</b> | 615 ± 25   | 700 ± 60   | 818 ± 56   | 802 ± 66   |
| 214674_at   | USP19     | ubiquitin specific protease 19                            | 0.0744           | <b>-0.0118</b>    | <b>0.0007</b>    | <b>-0.0251</b>    | <b>0.0021</b> | 107 ± 7    | 208 ± 23   | 184 ± 27   | 229 ± 23   |
| 38964_r_at  | WAS       | Wiskott-Aldrich syndrome (eczema-thrombocytopenia)        | 0.1578           | <b>-0.0080</b>    | <b>0.0339</b>    | -0.2478           | <b>0.0251</b> | 1682 ± 175 | 2132 ± 324 | 1683 ± 153 | 2946 ± 505 |
| 210200_at   | WWP2      | Nedd-4-like ubiquitin-protein ligase                      | 0.0806           | <b>-0.0011</b>    | <b>0.0066</b>    | <b>-0.0105</b>    | <b>0.0036</b> | 216 ± 15   | 268 ± 19   | 241 ± 18   | 354 ± 43   |

| Probe set            | Name    | Description                                                          | NFT <sub>0</sub> | MMSE <sub>0</sub> | NFT <sub>1</sub> | MMSE <sub>1</sub> | ANOVA         | Cntrl      | Incipient  | Moderate   | Severe     |
|----------------------|---------|----------------------------------------------------------------------|------------------|-------------------|------------------|-------------------|---------------|------------|------------|------------|------------|
| 202933_s_at          | YES1    | v-yes-1 Yamaguchi sarcoma viral oncogene homolog 1                   | <b>0.0385</b>    | <b>-0.0042</b>    | <b>0.0391</b>    | <b>-0.0003</b>    | <b>0.0156</b> | 609 ± 56   | 847 ± 86   | 991 ± 125  | 942 ± 67   |
| 219266_at            | ZBRK1   | zinc-finger protein ZBRK1                                            | <b>0.0089</b>    | -0.1478           | <b>0.0012</b>    | -0.1152           | <b>0.0170</b> | 100 ± 8    | 155 ± 18   | 131 ± 10   | 158 ± 16   |
| 201369_s_at          | ZFP36L2 | zinc finger protein 36, C3H type-like 2                              | <b>0.0119</b>    | <b>0.0000</b>     | 0.1361           | <b>-0.0031</b>    | <b>0.0011</b> | 177 ± 26   | 227 ± 23   | 238 ± 22   | 409 ± 66   |
| 206240_s_at          | ZNF136  | zinc finger protein 136 (clone pHZ-20)                               | <b>0.0039</b>    | <b>0.0000</b>     | <b>0.0098</b>    | <b>-0.0071</b>    | <b>0.0001</b> | 248 ± 13   | 321 ± 14   | 323 ± 30   | 480 ± 48   |
| 202778_s_at          | ZNF198  | zinc finger protein 198                                              | <b>0.0119</b>    | <b>-0.0137</b>    | 0.2370           | <b>-0.0015</b>    | <b>0.0046</b> | 929 ± 42   | 961 ± 43   | 1140 ± 37  | 1030 ± 41  |
| 215948_x_at          | ZNF237  | zinc finger protein 237                                              | <b>0.0393</b>    | <b>-0.0042</b>    | 0.3199           | <b>-0.0229</b>    | <b>0.0185</b> | 90 ± 8     | 101 ± 14   | 144 ± 9    | 133 ± 18   |
| 203247_s_at          | ZNF24   | zinc finger protein 24 (KOX 17)                                      | <b>0.0036</b>    | <b>-0.0204</b>    | 0.4647           | <b>-0.0326</b>    | 0.1285        | 808 ± 84   | 951 ± 65   | 988 ± 90   | 1108 ± 105 |
| 206900_x_at          | ZNF253  | zinc finger protein 253                                              | 0.0950           | <b>-0.0357</b>    | <b>0.0014</b>    | <b>-0.0328</b>    | <b>0.0342</b> | 203 ± 10   | 310 ± 33   | 283 ± 33   | 308 ± 30   |
| 206862_at            | ZNF254  | zinc finger protein 254                                              | <b>0.0076</b>    | -0.2379           | 0.1219           | <b>-0.0074</b>    | 0.3517        | 60 ± 7     | 78 ± 10    | 76 ± 4     | 103 ± 35   |
| 209989_at            | ZNF268  | zinc finger protein 268                                              | <b>0.0017</b>    | <b>-0.0202</b>    | <b>0.0242</b>    | 0.2564            | 0.0568        | 131 ± 11   | 165 ± 44   | 211 ± 20   | 238 ± 32   |
| 211975_at            | ZNF289  | zinc finger protein 289, ID1 regulated                               | <b>0.0399</b>    | -0.7879           | <b>0.0395</b>    | -0.4225           | 0.8304        | 1223 ± 88  | 1336 ± 130 | 1362 ± 117 | 1331 ± 150 |
| 209538_at            | ZNF32   | zinc finger protein 32 (KOX 30)                                      | 0.6879           | <b>-0.0458</b>    | -0.2701          | <b>-0.0232</b>    | 0.4415        | 418 ± 23   | 462 ± 85   | 507 ± 34   | 548 ± 89   |
| 206695_x_at          | ZNF43   | zinc finger protein 43 (HTF6)                                        | 0.2268           | <b>-0.0016</b>    | 0.1529           | <b>-0.0241</b>    | <b>0.0354</b> | 228 ± 15   | 264 ± 17   | 272 ± 17   | 310 ± 24   |
| 205089_at            | ZNF7    | zinc finger protein 7 (KOX 4, clone HF.16)                           | 0.1458           | <b>-0.0103</b>    | -0.4816          | <b>-0.0204</b>    | 0.0576        | 174 ± 11   | 185 ± 12   | 191 ± 11   | 226 ± 18   |
| 221645_s_at          | ZNF83   | zinc finger protein 83 (HPF1)                                        | 0.6657           | <b>-0.0478</b>    | 0.1521           | <b>-0.0133</b>    | 0.1220        | 283 ± 27   | 394 ± 44   | 432 ± 51   | 388 ± 54   |
| 204453_at            | ZNF84   | zinc finger protein 84 (HPF2)                                        | <b>0.0001</b>    | <b>-0.0192</b>    | 0.2051           | <b>-0.0099</b>    | 0.0592        | 87 ± 10    | 96 ± 13    | 133 ± 19   | 138 ± 21   |
| 208472_at            | ZNFN1A4 | zinc finger protein, subfamily 1A, 4 (Eos)                           | <b>0.0335</b>    | -0.1455           | <b>0.0288</b>    | <b>-0.0211</b>    | 0.3678        | 102 ± 11   | 138 ± 26   | 121 ± 12   | 149 ± 31   |
| 218548_x_at          | ZSIG11  | putative secreted protein ZSIG11                                     | 0.1565           | <b>-0.0164</b>    | 0.0785           | <b>-0.0459</b>    | 0.1738        | 177 ± 23   | 203 ± 17   | 207 ± 14   | 239 ± 20   |
| <b>Downregulated</b> |         |                                                                      |                  |                   |                  |                   |               |            |            |            |            |
| 221669_s_at          | ACAD8   | acyl-Coenzyme A dehydrogenase family, member 8                       | <b>-0.0048</b>   | <b>0.0115</b>     | <b>-0.0127</b>   | 0.1005            | <b>0.0036</b> | 518 ± 21   | 404 ± 30   | 387 ± 28   | 376 ± 30   |
| 208637_x_at          | ACTN1   | actinin, alpha 1                                                     | -0.2078          | <b>0.0309</b>     | -0.1291          | <b>0.0461</b>     | <b>0.0405</b> | 903 ± 46   | 722 ± 42   | 770 ± 44   | 720 ± 63   |
| 202135_s_at          | ACTR1B  | ARP1 actin-related protein 1 homolog B, centractin β                 | <b>-0.0104</b>   | 0.4508            | <b>-0.0249</b>   | 0.2736            | 0.6529        | 967 ± 60   | 860 ± 83   | 886 ± 62   | 868 ± 73   |
| 208644_at            | ADPRT   | ADP-ribosyltransferase                                               | <b>-0.0020</b>   | 0.1298            | <b>-0.0196</b>   | -0.4561           | 0.1858        | 1196 ± 67  | 1111 ± 70  | 1092 ± 77  | 970 ± 60   |
| 202759_s_at          | AKAP2   | A kinase (PRKA) anchor protein 2                                     | <b>-0.0251</b>   | 0.0691            | <b>-0.0136</b>   | -0.3125           | 0.2230        | 1219 ± 79  | 1193 ± 83  | 1141 ± 118 | 928 ± 129  |
| 201425_at            | ALDH2   | aldehyde dehydrogenase 2 family (mitochondrial)                      | -0.0615          | <b>0.0161</b>     | <b>-0.0228</b>   | 0.0997            | <b>0.0039</b> | 6579 ± 227 | 5151 ± 261 | 5117 ± 384 | 4890 ± 401 |
| 204174_at            | ALOX5AP | arachidonate 5-lipoxygenase-activating protein                       | <b>-0.0089</b>   | 0.5289            | <b>-0.0055</b>   | 0.3400            | 0.2616        | 771 ± 118  | 622 ± 75   | 475 ± 73   | 661 ± 144  |
| 202442_at            | AP3S1   | adaptor-related protein complex 3, sigma 1 subunit                   | <b>-0.0012</b>   | <b>0.0001</b>     | -0.4392          | <b>0.0096</b>     | <b>0.0011</b> | 4853 ± 235 | 4193 ± 84  | 3928 ± 179 | 3611 ± 226 |
| 203527_s_at          | APC     | adenomatosis polyposis coli                                          | <b>-0.0111</b>   | <b>0.0003</b>     | -0.1928          | <b>0.0461</b>     | <b>0.0021</b> | 637 ± 20   | 511 ± 73   | 472 ± 57   | 241 ± 95   |
| 201176_s_at          | ARCN1   | archain 1                                                            | <b>-0.0338</b>   | 0.0587            | <b>-0.0229</b>   | -0.4217           | 0.1365        | 1095 ± 51  | 1044 ± 110 | 948 ± 44   | 814 ± 130  |
| 200734_s_at          | ARF3    | ADP-ribosylation factor 3                                            | <b>-0.0030</b>   | <b>0.0003</b>     | -0.3908          | <b>0.0486</b>     | <b>0.0072</b> | 6169 ± 535 | 5151 ± 427 | 4503 ± 419 | 3636 ± 524 |
| 211891_s_at          | ARHGEF4 | Rho guanine nucleotide exchange factor (GEF) 4                       | -0.2452          | <b>0.0486</b>     | 0.3604           | <b>0.0476</b>     | 0.5472        | 461 ± 58   | 421 ± 40   | 406 ± 45   | 364 ± 33   |
| 210896_s_at          | ASPH    | aspartate beta-hydroxylase                                           | <b>-0.0021</b>   | <b>0.0017</b>     | <b>-0.0265</b>   | 0.2221            | <b>0.0005</b> | 561 ± 45   | 350 ± 40   | 374 ± 51   | 246 ± 20   |
| 208758_at            | ATIC    | IMP cyclohydrolase                                                   | <b>-0.0177</b>   | 0.2268            | <b>-0.0028</b>   | 0.1027            | <b>0.0220</b> | 1080 ± 27  | 987 ± 65   | 748 ± 99   | 981 ± 87   |
| 209186_at            | ATP2A2  | ATPase, Ca <sup>++</sup> transporting, cardiac muscle, slow twitch 2 | <b>-0.0197</b>   | <b>0.0488</b>     | <b>-0.0069</b>   | 0.1614            | <b>0.0508</b> | 3230 ± 62  | 2685 ± 287 | 2553 ± 162 | 2404 ± 294 |
| 204966_at            | BAI2    | brain-specific angiogenesis inhibitor 2                              | <b>-0.0406</b>   | <b>0.0034</b>     | 0.4526           | <b>0.0301</b>     | <b>0.0029</b> | 2809 ± 219 | 2051 ± 120 | 2491 ± 244 | 1672 ± 149 |
| 201491_at            | C14orf3 | chromosome 14 open reading frame 3                                   | <b>-0.0027</b>   | 0.0614            | <b>-0.0040</b>   | 0.2347            | <b>0.0385</b> | 1439 ± 66  | 1180 ± 124 | 1136 ± 74  | 1008 ± 124 |
| 222165_x_at          | C9orf16 | chromosome 9 open reading frame 16                                   | <b>-0.0085</b>   | <b>0.0369</b>     | 0.1424           | <b>0.0373</b>     | 0.3484        | 1259 ± 123 | 1250 ± 136 | 1089 ± 162 | 914 ± 176  |
| 212252_at            | CAMKK2  | calcium/calmodulin-dependent protein kinase kinase 2, β              | <b>-0.0149</b>   | <b>0.0028</b>     | 0.4553           | <b>0.0438</b>     | 0.0569        | 889 ± 47   | 825 ± 31   | 778 ± 96   | 626 ± 56   |
| 201947_s_at          | CCT2    | chaperonin containing TCP1, subunit 2 (beta)                         | -0.1040          | <b>0.0442</b>     | -0.1558          | <b>0.0115</b>     | 0.1182        | 1961 ± 144 | 1737 ± 60  | 1436 ± 110 | 1562 ± 265 |

| Probe set   | Name     | Description                                              | NFT <sub>0</sub> | MMSE <sub>0</sub> | NFT <sub>1</sub> | MMSE <sub>1</sub> | ANOVA         | Cntrl      | Incipient  | Moderate   | Severe     |
|-------------|----------|----------------------------------------------------------|------------------|-------------------|------------------|-------------------|---------------|------------|------------|------------|------------|
| 200910_at   | CCT3     | chaperonin containing TCP1, subunit 3 (gamma)            | <b>-0.0068</b>   | 0.1135            | <b>-0.0039</b>   | 0.2583            | 0.1063        | 1682 ± 105 | 1396 ± 100 | 1491 ± 67  | 1288 ± 162 |
| 200877_at   | CCT4     | chaperonin containing TCP1, subunit 4 (delta)            | <b>-0.0136</b>   | 0.0565            | -0.2119          | <b>0.0384</b>     | 0.1370        | 2441 ± 400 | 1690 ± 221 | 1675 ± 194 | 1460 ± 323 |
| 208696_at   | CCT5     | chaperonin containing TCP1, subunit 5 (epsilon)          | <b>-0.0357</b>   | 0.4168            | <b>-0.0205</b>   | 0.1860            | 0.1592        | 1481 ± 115 | 1170 ± 176 | 967 ± 43   | 1225 ± 251 |
| 200983_x_at | CD59     | CD59 antigen p18-20                                      | <b>-0.0087</b>   | <b>0.0396</b>     | <b>-0.0258</b>   | 0.2629            | 0.1173        | 1412 ± 273 | 1082 ± 143 | 1137 ± 172 | 663 ± 88   |
| 217881_s_at | CDC27    | cell division cycle 27                                   | <b>-0.0232</b>   | <b>0.0060</b>     | <b>-0.0030</b>   | 0.1676            | <b>0.0080</b> | 148 ± 15   | 110 ± 17   | 120 ± 18   | 58 ± 11    |
| 211297_s_at | CDK7     | cyclin-dependent kinase 7                                | <b>-0.0163</b>   | <b>0.0021</b>     | <b>-0.0137</b>   | <b>0.0265</b>     | <b>0.0118</b> | 219 ± 12   | 186 ± 9    | 169 ± 32   | 105 ± 24   |
| 219375_at   | CEPT1    | choline/ethanolaminephosphotransferase                   | <b>-0.0185</b>   | <b>0.0128</b>     | <b>-0.0028</b>   | -0.4291           | <b>0.0060</b> | 636 ± 68   | 500 ± 83   | 568 ± 34   | 294 ± 31   |
| 204170_s_at | CKS2     | CDC28 protein kinase 2                                   | <b>-0.0239</b>   | 0.2937            | <b>-0.0140</b>   | 0.1114            | 0.1372        | 225 ± 36   | 139 ± 12   | 191 ± 10   | 154 ± 31   |
| 205328_at   | CLDN10   | claudin 10                                               | <b>-0.0008</b>   | <b>0.0006</b>     | <b>-0.0275</b>   | 0.0899            | <b>0.0059</b> | 1243 ± 103 | 975 ± 50   | 847 ± 137  | 666 ± 105  |
| 213415_at   | CLIC2    | chloride intracellular channel 2                         | <b>-0.0493</b>   | 0.0763            | <b>-0.0229</b>   | 0.1437            | <b>0.0401</b> | 105 ± 30   | 30 ± 8     | 55 ± 15    | 24 ± 5     |
| 212358_at   | CLIPR-59 | CLIP-170-related protein                                 | -0.2073          | <b>0.0011</b>     | <b>-0.0029</b>   | 0.2576            | <b>0.0076</b> | 4117 ± 165 | 3717 ± 244 | 3897 ± 334 | 2845 ± 187 |
| 211980_at   | COL4A1   | collagen, type IV, alpha 1                               | <b>-0.0111</b>   | <b>0.0357</b>     | -0.0599          | <b>0.0418</b>     | <b>0.0339</b> | 689 ± 86   | 447 ± 65   | 423 ± 66   | 381 ± 79   |
| 221730_at   | COL5A2   | collagen, type V, alpha 2                                | <b>0.0000</b>    | <b>0.0007</b>     | <b>-0.0116</b>   | <b>0.0176</b>     | <b>0.0000</b> | 1659 ± 134 | 724 ± 123  | 195 ± 45   | 456 ± 222  |
| 201652_at   | COPS5    | COP9 constitutive photomorphogenic homolog subunit 5     | <b>-0.0029</b>   | 0.1119            | <b>-0.0347</b>   | 0.4678            | 0.2415        | 1170 ± 60  | 1079 ± 167 | 885 ± 84   | 916 ± 127  |
| 201256_at   | COX7A2L  | cytochrome c oxidase subunit VIIa polypeptide 2 like     | <b>-0.0365</b>   | <b>0.0106</b>     | 0.2968           | <b>0.0477</b>     | <b>0.0134</b> | 2624 ± 221 | 2158 ± 70  | 1833 ± 81  | 1970 ± 221 |
| 213846_at   | COX7C    | cytochrome c oxidase subunit VIIc                        | <b>-0.0033</b>   | <b>0.0009</b>     | -0.2401          | <b>0.0316</b>     | <b>0.0021</b> | 1180 ± 99  | 916 ± 81   | 841 ± 31   | 748 ± 66   |
| 205630_at   | CRH      | corticotropin releasing hormone                          | <b>-0.0235</b>   | <b>0.0378</b>     | 0.2689           | <b>0.0300</b>     | 0.0581        | 247 ± 48   | 186 ± 39   | 108 ± 10   | 154 ± 21   |
| 221517_s_at | CRSP6    | Sp1 transcriptional activation cofactor, subunit 6       | -0.1315          | <b>0.0491</b>     | <b>-0.0479</b>   | -0.4372           | 0.0973        | 315 ± 24   | 267 ± 28   | 228 ± 17   | 201 ± 54   |
| 220768_s_at | CSNK1G3  | casein kinase 1, gamma 3                                 | <b>-0.0247</b>   | <b>0.0095</b>     | <b>-0.0112</b>   | <b>0.0262</b>     | <b>0.0277</b> | 368 ± 22   | 297 ± 25   | 303 ± 13   | 271 ± 30   |
| 206075_s_at | CSNK2A1  | casein kinase 2, alpha 1 polypeptide                     | <b>-0.0100</b>   | <b>0.0104</b>     | <b>-0.0453</b>   | 0.2267            | <b>0.0423</b> | 431 ± 17   | 386 ± 20   | 359 ± 40   | 289 ± 47   |
| 203079_s_at | CUL2     | cullin 2                                                 | <b>-0.0179</b>   | <b>0.0012</b>     | -0.2967          | <b>0.0206</b>     | <b>0.0190</b> | 431 ± 28   | 382 ± 40   | 331 ± 17   | 304 ± 29   |
| 208872_s_at | D5S346   | DNA segment, single copy probe LNS-CAI/LNS-CAII          | <b>-0.0304</b>   | <b>0.0177</b>     | -0.2114          | <b>0.0005</b>     | 0.1083        | 681 ± 58   | 591 ± 54   | 524 ± 46   | 495 ± 68   |
| 200033_at   | DDX5     | DEAD/H box polypeptide 5                                 | <b>-0.0471</b>   | 0.5049            | <b>-0.0209</b>   | 0.3871            | 0.6756        | 4816 ± 211 | 4787 ± 203 | 4361 ± 380 | 4314 ± 594 |
| 209407_s_at | DEAF1    | deformed epidermal autoregulatory factor 1               | <b>-0.0458</b>   | 0.0854            | <b>-0.0015</b>   | <b>0.0319</b>     | 0.1909        | 1447 ± 115 | 1121 ± 108 | 1175 ± 121 | 1145 ± 139 |
| 210227_at   | DLGAP2   | discs, large (Drosophila) homolog-associated protein 2   | <b>-0.0206</b>   | <b>0.0009</b>     | <b>-0.0275</b>   | 0.2242            | <b>0.0238</b> | 1305 ± 73  | 1150 ± 147 | 1015 ± 128 | 789 ± 76   |
| 200881_s_at | DNAJA1   | DnaJ (Hsp40) homolog, subfamily A, member 1              | <b>-0.0115</b>   | 0.0951            | <b>-0.0059</b>   | 0.4265            | 0.0987        | 1620 ± 249 | 1215 ± 132 | 1296 ± 172 | 903 ± 68   |
| 212490_at   | DNAJC8   | DnaJ (Hsp40) homolog, subfamily C, member 8              | -0.2041          | <b>0.0406</b>     | 0.2941           | <b>0.0026</b>     | <b>0.0437</b> | 276 ± 20   | 215 ± 16   | 261 ± 22   | 200 ± 22   |
| 203258_at   | DRAP1    | DR1-associated protein 1 (negative cofactor 2 alpha)     | <b>-0.0156</b>   | <b>0.0137</b>     | <b>-0.0392</b>   | -0.4163           | <b>0.0287</b> | 762 ± 50   | 617 ± 106  | 573 ± 57   | 419 ± 82   |
| 200789_at   | ECH1     | enoyl Coenzyme A hydratase 1, peroxisomal                | <b>-0.0045</b>   | 0.0751            | <b>-0.0010</b>   | 0.1452            | 0.2163        | 795 ± 40   | 728 ± 41   | 688 ± 26   | 651 ± 85   |
| 201632_at   | EIF2B1   | eukaryotic translation initiation factor 2B, subunit 1 α | <b>-0.0165</b>   | 0.1292            | <b>-0.0242</b>   | 0.1385            | 0.1055        | 1099 ± 39  | 994 ± 24   | 897 ± 73   | 920 ± 85   |
| 218488_at   | EIF2B3   | eukaryotic translation initiation factor 2B, subunit 1 α | <b>-0.0017</b>   | <b>0.0221</b>     | <b>-0.0174</b>   | 0.2218            | <b>0.0271</b> | 443 ± 41   | 406 ± 23   | 303 ± 13   | 328 ± 50   |
| 221528_s_at | ELMO2    | engulfment and cell motility 2                           | -0.2807          | <b>0.0498</b>     | -0.3200          | <b>0.0314</b>     | 0.3301        | 828 ± 36   | 772 ± 70   | 732 ± 67   | 662 ± 86   |
| 204232_at   | FCER1G   | Fc fragment of IgE, high affinity I                      | <b>-0.0190</b>   | 0.1445            | <b>-0.0266</b>   | 0.3763            | 0.1576        | 1292 ± 193 | 1037 ± 91  | 944 ± 58   | 921 ± 83   |
| 214505_s_at | FHL1     | four and a half LIM domains 1                            | -0.2094          | <b>0.0486</b>     | 0.3758           | <b>0.0415</b>     | 0.2475        | 526 ± 76   | 515 ± 94   | 329 ± 38   | 387 ± 96   |
| 206857_s_at | FKBP1B   | FK506 binding protein 1B, 12.6 kDa                       | <b>-0.0074</b>   | <b>0.0218</b>     | 0.2725           | <b>0.0184</b>     | 0.0794        | 2493 ± 299 | 2116 ± 186 | 1592 ± 196 | 1751 ± 286 |
| 219170_at   | FSD1     | fibronectin type 3 and SPRY domain-containing protein    | -0.3995          | <b>0.0208</b>     | <b>-0.0207</b>   | 0.1889            | 0.1650        | 1016 ± 65  | 848 ± 121  | 823 ± 106  | 703 ± 101  |
| 205850_s_at | GABRB3   | gamma-aminobutyric acid (GABA) A receptor, beta 3        | <b>-0.0089</b>   | <b>0.0515</b>     | -0.3541          | <b>0.0264</b>     | 0.3529        | 157 ± 17   | 138 ± 24   | 111 ± 15   | 118 ± 26   |
| 206435_at   | GALGT    | UDP-N-acetyl-α-D-galactosamine                           | <b>-0.0456</b>   | <b>0.0014</b>     | 0.3795           | <b>0.0130</b>     | <b>0.0116</b> | 647 ± 76   | 501 ± 61   | 407 ± 47   | 388 ± 21   |
| 206662_at   | GLRX     | glutaredoxin (thioltransferase)                          | -0.0728          | <b>0.0340</b>     | -0.4513          | <b>0.0457</b>     | <b>0.0196</b> | 1484 ± 231 | 829 ± 69   | 846 ± 76   | 829 ± 166  |

| Probe set   | Name      | Description                                             | NFT <sub>0</sub> | MMSE <sub>0</sub> | NFT <sub>1</sub> | MMSE <sub>1</sub> | ANOVA         | Cntrl       | Incipient   | Moderate    | Severe       |
|-------------|-----------|---------------------------------------------------------|------------------|-------------------|------------------|-------------------|---------------|-------------|-------------|-------------|--------------|
| 200648_s_at | GLUL      | glutamate-ammonia ligase (glutamine synthase)           | <b>-0.0324</b>   | <b>0.0321</b>     | <b>-0.0247</b>   | 0.4324            | 0.0844        | 2336 ± 499  | 1694 ± 273  | 1658 ± 161  | 978 ± 281    |
| 212273_x_at | GNAS      | GNAS complex locus                                      | <b>-0.0305</b>   | <b>0.0024</b>     | <b>-0.0022</b>   | <b>0.0457</b>     | <b>0.0151</b> | 15346 ± 513 | 12684 ± 969 | 13037 ± 942 | 10407 ± 1560 |
| 200744_s_at | GNB1      | G protein, β polypeptide 1                              | <b>-0.0362</b>   | 0.2471            | <b>-0.0395</b>   | 0.1740            | 0.1601        | 662 ± 73    | 474 ± 52    | 538 ± 58    | 482 ± 70     |
| 221288_at   | GPR22     | G protein-coupled receptor 22                           | -0.0612          | <b>0.0004</b>     | -0.2999          | <b>0.0149</b>     | <b>0.0054</b> | 335 ± 43    | 240 ± 40    | 141 ± 30    | 152 ± 48     |
| 202678_at   | GTF2A2    | general transcription factor IIA, 2, 12kDa              | <b>-0.0174</b>   | 0.1775            | -0.0760          | <b>0.0448</b>     | 0.1555        | 825 ± 39    | 670 ± 49    | 635 ± 64    | 683 ± 89     |
| 211569_s_at | HADHSC    | L-3-hydroxyacyl-Coenzyme A dehydrogenase, short chain   | -0.2232          | <b>0.0493</b>     | <b>-0.0326</b>   | 0.4335            | 0.2136        | 323 ± 24    | 333 ± 17    | 286 ± 24    | 272 ± 17     |
| 211529_x_at | HLA-G     | HLA-G histocompatibility antigen, class I, G            | <b>-0.0485</b>   | 0.1848            | <b>-0.0247</b>   | 0.2852            | 0.1475        | 1182 ± 209  | 823 ± 174   | 1040 ± 189  | 580 ± 158    |
| 212434_at   | HMGE      | GrpE-like protein cochaperone                           | <b>-0.0001</b>   | <b>0.0021</b>     | <b>-0.0204</b>   | 0.2548            | <b>0.0095</b> | 548 ± 25    | 486 ± 57    | 400 ± 41    | 333 ± 56     |
| 208744_x_at | HSP105B   | heat shock 105kD                                        | <b>-0.0012</b>   | <b>0.0082</b>     | <b>-0.0337</b>   | 0.0777            | <b>0.0150</b> | 462 ± 55    | 309 ± 77    | 228 ± 37    | 220 ± 38     |
| 211936_at   | HSPA5     | HSP 5 70kDa                                             | <b>-0.0018</b>   | <b>0.0149</b>     | <b>-0.0090</b>   | 0.1392            | <b>0.0186</b> | 2203 ± 259  | 1540 ± 177  | 1408 ± 167  | 1183 ± 238   |
| 218291_at   | HSPC003   | HSPC003 protein                                         | <b>-0.0072</b>   | <b>0.0030</b>     | <b>-0.0466</b>   | 0.2915            | <b>0.0218</b> | 422 ± 16    | 406 ± 48    | 378 ± 35    | 284 ± 21     |
| 211968_s_at | HSPCA     | heat shock 90kDa protein 1, alpha                       | <b>-0.0382</b>   | 0.1059            | <b>-0.0100</b>   | 0.1738            | 0.1110        | 4154 ± 682  | 2608 ± 460  | 3120 ± 537  | 2216 ± 401   |
| 200064_at   | HSPCB     | heat shock 90kDa protein 1, beta                        | <b>-0.0009</b>   | <b>0.0018</b>     | <b>-0.0232</b>   | 0.0583            | <b>0.0042</b> | 8350 ± 770  | 5982 ± 745  | 5472 ± 549  | 4407 ± 725   |
| 214787_at   | IRLB      | c-myc promoter-binding protein                          | -0.0709          | <b>0.0048</b>     | <b>-0.0217</b>   | 0.1709            | <b>0.0004</b> | 214 ± 13    | 177 ± 9     | 207 ± 7     | 134 ± 15     |
| 221307_at   | KCNIP1    | Kv channel interacting protein 1                        | <b>-0.0303</b>   | <b>0.0362</b>     | -0.2481          | <b>0.0262</b>     | 0.1303        | 255 ± 18    | 209 ± 25    | 201 ± 15    | 174 ± 38     |
| 214788_x_at | KIAA0749  | KIAA0749 protein/ Dendrin                               | <b>-0.0081</b>   | <b>0.0028</b>     | 0.4395           | <b>0.0182</b>     | 0.0565        | 3347 ± 309  | 3178 ± 591  | 2570 ± 333  | 1852 ± 351   |
| 200945_s_at | KIAA0905  | yeast Sec31p homolog                                    | <b>-0.0008</b>   | <b>0.0080</b>     | <b>-0.0137</b>   | -0.2660           | <b>0.0108</b> | 2166 ± 81   | 1972 ± 97   | 1952 ± 102  | 1608 ± 156   |
| 212163_at   | KIDINS220 | likely homolog of rat kinase D-interacting substance    | <b>-0.0015</b>   | <b>0.0020</b>     | <b>-0.0208</b>   | 0.0694            | <b>0.0088</b> | 2276 ± 58   | 2107 ± 68   | 1908 ± 62   | 1641 ± 238   |
| 209234_at   | KIF1B     | kinesin family member 1B                                | <b>-0.0038</b>   | 0.1867            | <b>-0.0227</b>   | 0.2863            | 0.4746        | 5189 ± 229  | 4970 ± 315  | 4743 ± 209  | 4688 ± 277   |
| 203130_s_at | KIF5C     | kinesin family member 5C                                | <b>-0.0446</b>   | 0.1471            | <b>-0.0291</b>   | 0.4904            | 0.4423        | 9415 ± 336  | 8693 ± 827  | 8447 ± 608  | 8112 ± 467   |
| 203619_s_at | LFG       | lifeguard                                               | <b>-0.0021</b>   | <b>0.0067</b>     | <b>-0.0271</b>   | -0.4897           | <b>0.0416</b> | 2634 ± 203  | 2468 ± 295  | 2140 ± 163  | 1807 ± 135   |
| 208936_x_at | LGALS8    | lectin, galactoside-binding, soluble, 8 (galectin 8)    | <b>0.0000</b>    | <b>0.0033</b>     | <b>-0.0256</b>   | -0.3466           | <b>0.0073</b> | 532 ± 12    | 528 ± 40    | 388 ± 35    | 379 ± 57     |
| 203721_s_at | LOC51096  | CGI-48 protein                                          | <b>-0.0007</b>   | 0.1188            | -0.1623          | <b>0.0444</b>     | 0.1178        | 783 ± 50    | 697 ± 16    | 621 ± 19    | 667 ± 83     |
| 218657_at   | LOC51195  | Link guanine nucleotide exchange factor II              | -0.1778          | <b>0.0184</b>     | <b>-0.0451</b>   | <b>0.0488</b>     | <b>0.0305</b> | 760 ± 53    | 459 ± 72    | 633 ± 128   | 377 ± 110    |
| 220046_s_at | LOC57018  | cyclin L ania-6a                                        | <b>-0.0176</b>   | 0.5403            | <b>-0.0028</b>   | 0.4446            | 0.1491        | 851 ± 54    | 707 ± 32    | 702 ± 33    | 755 ± 78     |
| 212741_at   | MAOA      | monoamine oxidase A                                     | <b>-0.0251</b>   | <b>0.0034</b>     | <b>-0.0281</b>   | <b>0.0459</b>     | <b>0.0208</b> | 1373 ± 102  | 1190 ± 59   | 1159 ± 76   | 993 ± 58     |
| 203266_s_at | MAP2K4    | mitogen-activated protein kinase kinase 4               | <b>-0.0403</b>   | <b>0.0202</b>     | <b>-0.0292</b>   | 0.1064            | <b>0.0378</b> | 1519 ± 123  | 1249 ± 198  | 936 ± 93    | 1072 ± 171   |
| 201475_x_at | MARS      | methionine-tRNA synthetase                              | <b>0.0000</b>    | <b>0.0001</b>     | <b>-0.0004</b>   | 0.1363            | <b>0.0000</b> | 1803 ± 60   | 1457 ± 118  | 1293 ± 46   | 1100 ± 71    |
| 212535_at   | MEF2A     | MADS box transcription enhancer factor 2, polypeptide A | <b>-0.0192</b>   | 0.6612            | <b>-0.0416</b>   | -0.2256           | 0.4413        | 1536 ± 46   | 1513 ± 128  | 1675 ± 133  | 1375 ± 181   |
| 207098_s_at | MFN1      | mitofusin 1                                             | <b>-0.0023</b>   | <b>0.0158</b>     | <b>-0.0349</b>   | -0.2853           | <b>0.0226</b> | 247 ± 13    | 248 ± 20    | 238 ± 17    | 175 ± 20     |
| 212945_s_at | MGA       | MAX dimerization protein 5                              | <b>-0.0095</b>   | <b>0.0143</b>     | <b>-0.0216</b>   | 0.4838            | <b>0.0362</b> | 254 ± 36    | 219 ± 15    | 225 ± 36    | 111 ± 27     |
| 211026_s_at | MGLL      | monoglyceride lipase                                    | <b>-0.0177</b>   | <b>0.0033</b>     | -0.1921          | <b>0.0069</b>     | 0.0667        | 2671 ± 109  | 2619 ± 222  | 2221 ± 173  | 2142 ± 133   |
| 218138_at   | MKKS      | McKusick-Kaufman syndrome                               | <b>-0.0137</b>   | <b>0.0019</b>     | <b>-0.0088</b>   | <b>0.0224</b>     | <b>0.0006</b> | 850 ± 26    | 662 ± 68    | 568 ± 29    | 589 ± 52     |
| 203466_at   | MPV17     | MpV17 transgene, murine homolog, glomerulosclerosis     | <b>-0.0229</b>   | <b>0.0117</b>     | <b>-0.0429</b>   | 0.3221            | 0.0767        | 315 ± 46    | 286 ± 69    | 181 ± 51    | 136 ± 47     |
| 218027_at   | MRPL15    | mitochondrial ribosomal protein L15                     | <b>-0.0019</b>   | <b>0.0002</b>     | <b>-0.0220</b>   | <b>0.0269</b>     | <b>0.0001</b> | 692 ± 42    | 522 ± 42    | 394 ± 49    | 399 ± 32     |
| 203371_s_at | NDUFB3    | NADH dehydrogenase (ubiquinone) 1 β subcomplex, 3       | -0.1416          | <b>0.0104</b>     | <b>-0.0468</b>   | <b>0.0024</b>     | <b>0.0302</b> | 1218 ± 95   | 961 ± 31    | 1007 ± 66   | 877 ± 92     |
| 201226_at   | NDUFB8    | NADH dehydrogenase (ubiquinone) 1 β subcomplex, 8       | <b>-0.0026</b>   | <b>0.0001</b>     | <b>-0.0405</b>   | 0.1912            | <b>0.0007</b> | 2559 ± 119  | 2383 ± 192  | 2165 ± 199  | 1444 ± 95    |
| 201840_at   | NEDD8     | neural precursor expressed, developmentally 8           | <b>-0.0509</b>   | <b>0.0349</b>     | <b>-0.0109</b>   | 0.2999            | 0.0880        | 1296 ± 78   | 1003 ± 166  | 1033 ± 79   | 817 ± 193    |
| 206089_at   | NELL1     | NEL-like 1 (chicken)                                    | -0.0574          | <b>0.0067</b>     | -0.2908          | <b>0.0448</b>     | <b>0.0042</b> | 285 ± 72    | 88 ± 20     | 72 ± 13     | 50 ± 10      |

| Probe set   | Name     | Description                                             | NFT <sub>0</sub> | MMSE <sub>0</sub> | NFT <sub>1</sub> | MMSE <sub>1</sub> | ANOVA         | Cntrl       | Incipient   | Moderate    | Severe      |
|-------------|----------|---------------------------------------------------------|------------------|-------------------|------------------|-------------------|---------------|-------------|-------------|-------------|-------------|
| 201077_s_at | NHP2L1   | non-histone chromosome protein 2-like 1                 | <b>-0.0051</b>   | <b>0.0000</b>     | -0.0980          | <b>0.0174</b>     | <b>0.0001</b> | 1996 ± 74   | 1860 ± 49   | 1599 ± 43   | 1487 ± 108  |
| 202475_at   | NIFIE14  | seven transmembrane domain protein                      | <b>-0.0038</b>   | 0.1706            | <b>-0.0091</b>   | 0.1416            | 0.1809        | 1663 ± 77   | 1554 ± 159  | 1268 ± 99   | 1392 ± 193  |
| 205728_at   | ODZ1     | odz, odd Oz/ten-m homolog 1(Drosophila)                 | <b>-0.0105</b>   | <b>0.0067</b>     | 0.4922           | <b>0.0457</b>     | <b>0.0306</b> | 386 ± 51    | 257 ± 15    | 252 ± 40    | 215 ± 33    |
| 214306_at   | OPA1     | optic atrophy 1 (autosomal dominant)                    | -0.2031          | <b>0.0313</b>     | -0.3732          | <b>0.0246</b>     | 0.1938        | 883 ± 65    | 859 ± 76    | 909 ± 91    | 677 ± 49    |
| 204957_at   | ORC5L    | origin recognition complex, subunit 5-like (yeast)      | <b>-0.0425</b>   | 0.0823            | <b>-0.0323</b>   | 0.3690            | 0.4154        | 562 ± 18    | 506 ± 62    | 497 ± 34    | 462 ± 48    |
| 217831_s_at | p47      | p47 (rat)                                               | -0.2827          | <b>0.0279</b>     | <b>-0.0362</b>   | 0.2512            | 0.2037        | 381 ± 39    | 345 ± 46    | 331 ± 24    | 270 ± 32    |
| 207668_x_at | P5       | protein disulfide isomerase-related protein             | <b>-0.0257</b>   | 0.1825            | <b>-0.0037</b>   | 0.2605            | 0.1631        | 884 ± 84    | 743 ± 92    | 855 ± 87    | 622 ± 45    |
| 200813_s_at | PAFAH1B1 | platelet-activating factor acetylhydrolase Ib α         | <b>-0.0156</b>   | <b>0.0352</b>     | <b>-0.0474</b>   | 0.1346            | 0.0989        | 1369 ± 154  | 1104 ± 121  | 1125 ± 90   | 890 ± 137   |
| 210076_x_at | PAI-RBP1 | PAI-1 mRNA-binding protein                              | -0.0715          | <b>0.0091</b>     | -0.0828          | <b>0.0437</b>     | <b>0.0003</b> | 760 ± 53    | 507 ± 44    | 562 ± 22    | 509 ± 26    |
| 214607_at   | PAK3     | p21 (CDKN1A)-activated kinase 3                         | <b>-0.0474</b>   | <b>0.0005</b>     | -0.4297          | <b>0.0191</b>     | <b>0.0403</b> | 3105 ± 117  | 2810 ± 340  | 2598 ± 311  | 2016 ± 192  |
| 204715_at   | PANX1    | pannexin 1                                              | <b>-0.0343</b>   | 0.0906            | <b>-0.0089</b>   | 0.2841            | 0.0762        | 164 ± 17    | 120 ± 22    | 111 ± 6     | 102 ± 22    |
| 203660_s_at | PCNT2    | pericentrin 2 (kendrin)                                 | <b>-0.0063</b>   | 0.1465            | <b>-0.0208</b>   | -0.4415           | 0.2669        | 1071 ± 43   | 995 ± 130   | 880 ± 55    | 890 ± 75    |
| 205549_at   | PCP4     | Purkinje cell protein 4                                 | -0.0731          | <b>0.0132</b>     | -0.3427          | <b>0.0067</b>     | <b>0.0098</b> | 2632 ± 442  | 1385 ± 316  | 2131 ± 138  | 1094 ± 196  |
| 200980_s_at | PDHA1    | pyruvate dehydrogenase (lipoamide) alpha 1              | <b>-0.0043</b>   | <b>0.0001</b>     | <b>-0.0098</b>   | 0.2160            | <b>0.0016</b> | 1331 ± 26   | 1249 ± 64   | 1146 ± 59   | 1028 ± 43   |
| 203067_at   | PDX1     | Pyruvate dehydrogenase complex, E3-binding protein      | -0.1471          | <b>0.0135</b>     | -0.4208          | <b>0.0339</b>     | 0.1166        | 893 ± 86    | 775 ± 67    | 773 ± 53    | 630 ± 78    |
| 218336_at   | PFDN2    | prefoldin 2                                             | -0.0804          | <b>0.0083</b>     | <b>-0.0340</b>   | 0.3985            | <b>0.0337</b> | 1546 ± 105  | 1423 ± 134  | 1446 ± 118  | 1053 ± 107  |
| 219394_at   | PGS1     | phosphatidylglycerophosphate synthase                   | <b>-0.0119</b>   | 0.0730            | <b>-0.0015</b>   | <b>0.0068</b>     | 0.1517        | 380 ± 20    | 315 ± 21    | 302 ± 39    | 259 ± 55    |
| 212518_at   | PIP5K1C  | phosphatidylinositol-4-phosphate 5-kinase, type I, γ    | <b>-0.0484</b>   | <b>0.0185</b>     | -0.4943          | <b>0.0280</b>     | 0.1774        | 2340 ± 126  | 2152 ± 147  | 2124 ± 169  | 1847 ± 173  |
| 217848_s_at | PP       | pyrophosphatase (inorganic)                             | <b>-0.0039</b>   | 0.0898            | <b>-0.0177</b>   | 0.2296            | 0.1549        | 4022 ± 416  | 3457 ± 163  | 2915 ± 234  | 3072 ± 483  |
| 202457_s_at | PPP3CA   | calcineurin A α                                         | <b>-0.0006</b>   | <b>0.0001</b>     | -0.0580          | <b>0.0480</b>     | <b>0.0048</b> | 8074 ± 589  | 6655 ± 800  | 5487 ± 477  | 4384 ± 825  |
| 204507_s_at | PPP3R1   | calcineurin B, type I                                   | <b>-0.0086</b>   | <b>0.0017</b>     | 0.4935           | <b>0.0485</b>     | <b>0.0136</b> | 405 ± 62    | 300 ± 50    | 227 ± 13    | 191 ± 39    |
| 205839_s_at | PRAX-1   | peripheral benzodiazepine receptor-associated protein 1 | <b>-0.0440</b>   | <b>0.0009</b>     | 0.2981           | <b>0.0304</b>     | <b>0.0006</b> | 844 ± 41    | 664 ± 54    | 584 ± 28    | 595 ± 51    |
| 201068_s_at | PSMC2    | proteasome (prosome, macropain) 26S subunit, ATPase, 2  | <b>-0.0129</b>   | 0.1136            | <b>-0.0444</b>   | 0.1440            | 0.2789        | 1438 ± 71   | 1274 ± 133  | 1140 ± 94   | 1142 ± 183  |
| 210675_s_at | PTPRR    | protein tyrosine phosphatase, receptor type, R          | -0.5414          | <b>0.0276</b>     | <b>-0.0436</b>   | 0.0865            | 0.0904        | 325 ± 22    | 242 ± 31    | 262 ± 36    | 205 ± 38    |
| 209849_s_at | RAD51C   | RAD51 homolog C (S. cerevisiae)                         | <b>-0.0011</b>   | <b>0.0018</b>     | -0.1173          | <b>0.0339</b>     | <b>0.0009</b> | 481 ± 35    | 400 ± 15    | 289 ± 22    | 318 ± 48    |
| 201713_s_at | RANBP2   | RAN binding protein 2                                   | <b>-0.0195</b>   | <b>0.0016</b>     | <b>-0.0119</b>   | 0.1367            | <b>0.0027</b> | 939 ± 70    | 807 ± 36    | 833 ± 61    | 550 ± 65    |
| 200992_at   | RANBP7   | RAN binding protein 7                                   | <b>-0.0019</b>   | <b>0.0007</b>     | <b>-0.0068</b>   | 0.1707            | <b>0.0034</b> | 1226 ± 50   | 1083 ± 44   | 1061 ± 54   | 922 ± 37    |
| 202033_s_at | RB1CC1   | RB1-inducible coiled-coil 1                             | <b>-0.0016</b>   | <b>0.0021</b>     | <b>-0.0057</b>   | 0.4574            | <b>0.0026</b> | 1687 ± 137  | 1333 ± 149  | 1271 ± 136  | 903 ± 84    |
| 38290_at    | RGS14    | regulator of G-protein signalling 14                    | <b>-0.0056</b>   | <b>0.0484</b>     | -0.2988          | <b>0.0201</b>     | 0.0819        | 496 ± 50    | 410 ± 73    | 295 ± 29    | 362 ± 69    |
| 210138_at   | RGS20    | regulator of G-protein signalling 20                    | <b>-0.0259</b>   | <b>0.0456</b>     | -0.4349          | <b>0.0178</b>     | 0.1560        | 700 ± 58    | 579 ± 48    | 604 ± 54    | 525 ± 54    |
| 204339_s_at | RGS4     | regulator of G-protein signalling 4                     | -0.2501          | <b>0.0047</b>     | 0.4753           | <b>0.0108</b>     | 0.0627        | 710 ± 97    | 548 ± 40    | 577 ± 65    | 419 ± 40    |
| 206137_at   | RIMS2    | regulating synaptic membrane exocytosis 2               | <b>-0.0039</b>   | <b>0.0005</b>     | <b>-0.0362</b>   | 0.0617            | <b>0.0014</b> | 733 ± 45    | 580 ± 26    | 547 ± 79    | 341 ± 67    |
| 213194_at   | ROBO1    | roundabout, axon guidance receptor, homolog 1           | <b>-0.0229</b>   | <b>0.0273</b>     | <b>-0.0276</b>   | 0.2454            | 0.0965        | 984 ± 82    | 859 ± 86    | 870 ± 61    | 676 ± 103   |
| 202762_at   | ROCK2    | Rho-associated, coiled-coil containing protein kinase 2 | <b>-0.0190</b>   | <b>0.0339</b>     | -0.4821          | <b>0.0486</b>     | 0.2037        | 1227 ± 85   | 1081 ± 67   | 1081 ± 74   | 966 ± 109   |
| 221770_at   | RPE      | ribose-5-phosphate-3-epimerase                          | <b>-0.0228</b>   | <b>0.0031</b>     | -0.1453          | <b>0.0405</b>     | <b>0.0123</b> | 179 ± 24    | 155 ± 18    | 87 ± 15     | 99 ± 27     |
| 200074_s_at | RPL14    | ribosomal protein L14                                   | <b>-0.0217</b>   | <b>0.0004</b>     | -0.2493          | <b>0.0482</b>     | <b>0.0005</b> | 2098 ± 88   | 2117 ± 133  | 2057 ± 86   | 1450 ± 105  |
| 202029_x_at | RPL38    | ribosomal protein L38                                   | -0.1238          | <b>0.0136</b>     | <b>-0.0222</b>   | -0.4213           | <b>0.0234</b> | 12727 ± 476 | 12211 ± 521 | 12152 ± 629 | 10199 ± 636 |
| 213689_x_at | RPL5     | ribosomal protein L5                                    | <b>-0.0137</b>   | 0.1197            | <b>-0.0144</b>   | 0.2009            | 0.1555        | 2350 ± 106  | 2050 ± 227  | 1983 ± 71   | 1911 ± 169  |
| 200034_s_at | RPL6     | ribosomal protein L6                                    | <b>-0.0033</b>   | <b>0.0230</b>     | <b>-0.0440</b>   | -0.3552           | <b>0.0290</b> | 5621 ± 278  | 4976 ± 478  | 5064 ± 363  | 3918 ± 311  |

| Probe set   | Name    | Description                                                            | NFT <sub>0</sub> | MMSE <sub>0</sub> | NFT <sub>1</sub> | MMSE <sub>1</sub> | ANOVA         | Cntrl      | Incipient  | Moderate   | Severe     |
|-------------|---------|------------------------------------------------------------------------|------------------|-------------------|------------------|-------------------|---------------|------------|------------|------------|------------|
| 208689_s_at | RPN2    | ribophorin II                                                          | <b>-0.0299</b>   | 0.3807            | <b>-0.0149</b>   | 0.4547            | 0.5514        | 1178 ± 115 | 1022 ± 100 | 992 ± 91   | 995 ± 127  |
| 201980_s_at | RSU1    | Ras suppressor protein 1                                               | -0.0709          | <b>0.0021</b>     | <b>-0.0167</b>   | 0.2310            | <b>0.0132</b> | 451 ± 29   | 417 ± 11   | 343 ± 29   | 345 ± 23   |
| 212438_at   | RY1     | putative nucleic acid binding protein RY-1                             | <b>-0.0145</b>   | 0.1005            | -0.1391          | <b>0.0015</b>     | <b>0.0074</b> | 600 ± 51   | 452 ± 21   | 410 ± 32   | 478 ± 25   |
| 210592_s_at | SAT     | spermidine/spermine N1-acetyltransferase                               | <b>-0.0037</b>   | 0.3238            | <b>-0.0208</b>   | 0.4136            | 0.3122        | 5993 ± 501 | 5236 ± 280 | 4845 ± 324 | 4789 ± 827 |
| 210432_s_at | SCN3A   | Na <sup>+</sup> channel, voltage-gated, type III, $\alpha$ polypeptide | <b>-0.0154</b>   | <b>0.0222</b>     | <b>-0.0122</b>   | 0.1496            | 0.0948        | 1177 ± 57  | 951 ± 143  | 1090 ± 179 | 673 ± 160  |
| 201093_x_at | SDHA    | succinate dehydrogenase complex A, flavoprotein                        | <b>-0.0350</b>   | 0.0601            | <b>-0.0064</b>   | 0.2115            | <b>0.0214</b> | 797 ± 39   | 635 ± 87   | 501 ± 13   | 574 ± 92   |
| 201583_s_at | SEC23B  | Sec23 homolog B ( <i>S. cerevisiae</i> )                               | -0.1008          | <b>0.0249</b>     | -0.0902          | <b>0.0112</b>     | <b>0.0198</b> | 477 ± 37   | 371 ± 28   | 355 ± 20   | 372 ± 24   |
| 201381_x_at | SIP     | Siah-interacting protein                                               | <b>-0.0042</b>   | <b>0.0044</b>     | -0.1175          | <b>0.0358</b>     | 0.0727        | 2353 ± 238 | 2264 ± 116 | 1901 ± 161 | 1598 ± 237 |
| 212826_s_at | SLC25A6 | solute carrier family 25, 6                                            | <b>-0.0159</b>   | <b>0.0195</b>     | -0.1365          | <b>0.0032</b>     | <b>0.0121</b> | 2006 ± 86  | 1710 ± 103 | 1907 ± 107 | 1518 ± 121 |
| 213921_at   | SST     | somatostatin                                                           | <b>-0.0182</b>   | <b>0.0005</b>     | -0.1698          | <b>0.0036</b>     | <b>0.0006</b> | 1010 ± 123 | 551 ± 89   | 478 ± 88   | 401 ± 52   |
| 201837_s_at | STAF65  | SPTF-associated factor 65 gamma                                        | <b>-0.0266</b>   | <b>0.0008</b>     | <b>-0.0283</b>   | <b>0.0213</b>     | <b>0.0027</b> | 773 ± 35   | 684 ± 51   | 689 ± 17   | 545 ± 44   |
| 206552_s_at | TAC1    | tachykinin, precursor 1                                                | <b>-0.0073</b>   | <b>0.0015</b>     | -0.2139          | <b>0.0132</b>     | <b>0.0006</b> | 1079 ± 171 | 432 ± 97   | 373 ± 80   | 305 ± 84   |
| 212330_at   | TFDP1   | transcription factor Dp-1                                              | <b>-0.0150</b>   | 0.1940            | <b>-0.0179</b>   | 0.4048            | 0.3835        | 464 ± 13   | 404 ± 34   | 395 ± 37   | 392 ± 44   |
| 203661_s_at | TMOD    | tropomodulin                                                           | <b>-0.0225</b>   | <b>0.0138</b>     | -0.0604          | <b>0.0329</b>     | 0.0833        | 569 ± 30   | 480 ± 35   | 488 ± 35   | 436 ± 45   |
| 215108_x_at | TNRC9   | trinucleotide repeat containing 9                                      | <b>-0.0060</b>   | <b>0.0004</b>     | -0.2306          | <b>0.0133</b>     | <b>0.0004</b> | 298 ± 27   | 201 ± 22   | 216 ± 27   | 117 ± 14   |
| 208901_s_at | TOP1    | topoisomerase (DNA) I                                                  | <b>-0.0082</b>   | <b>0.0073</b>     | <b>-0.0003</b>   | 0.0978            | <b>0.0020</b> | 997 ± 66   | 809 ± 63   | 932 ± 50   | 641 ± 45   |
| 211700_s_at | TRO     | trophinin                                                              | <b>-0.0280</b>   | 0.0977            | <b>-0.0230</b>   | -0.2825           | 0.1240        | 279 ± 17   | 262 ± 32   | 263 ± 28   | 189 ± 31   |
| 210645_s_at | TTC3    | tetratricopeptide repeat domain 3                                      | <b>-0.0073</b>   | <b>0.0298</b>     | -0.3931          | <b>0.0351</b>     | 0.1376        | 5465 ± 512 | 4310 ± 409 | 3978 ± 454 | 3936 ± 710 |
| 203894_at   | TUBG2   | tubulin, gamma 2                                                       | <b>-0.0054</b>   | <b>0.0000</b>     | -0.3823          | <b>0.0107</b>     | <b>0.0000</b> | 1044 ± 50  | 819 ± 38   | 788 ± 45   | 630 ± 20   |
| 218082_s_at | UBP1    | upstream binding protein 1 (LBP-1a)                                    | -0.2317          | <b>0.0211</b>     | -0.2324          | <b>0.0337</b>     | <b>0.0186</b> | 1056 ± 65  | 843 ± 74   | 970 ± 44   | 785 ± 62   |
| 203031_s_at | UROS    | uroporphyrinogen III synthase                                          | -0.1470          | <b>0.0183</b>     | 0.2132           | <b>0.0104</b>     | <b>0.0280</b> | 1484 ± 131 | 1086 ± 68  | 1181 ± 86  | 1068 ± 75  |
| 209475_at   | USP15   | ubiquitin specific protease 15                                         | <b>-0.0013</b>   | <b>0.0097</b>     | <b>-0.0193</b>   | -0.4392           | <b>0.0509</b> | 850 ± 38   | 799 ± 80   | 734 ± 61   | 623 ± 20   |
| 206405_x_at | USP6    | ubiquitin specific protease 6 (Tre-2 oncogene)                         | <b>-0.0096</b>   | 0.5816            | <b>-0.0089</b>   | -0.3005           | 0.8362        | 2521 ± 189 | 2491 ± 258 | 2398 ± 266 | 2244 ± 196 |
| 207100_s_at | VAMP1   | vesicle-associated membrane protein 1                                  | <b>-0.0274</b>   | <b>0.0178</b>     | <b>-0.0465</b>   | 0.3950            | 0.0562        | 335 ± 51   | 285 ± 70   | 272 ± 21   | 138 ± 15   |
| 219478_at   | WFDC1   | WAP four-disulfide core domain 1                                       | <b>-0.0005</b>   | <b>0.0002</b>     | -0.1372          | <b>0.0313</b>     | <b>0.0023</b> | 780 ± 59   | 623 ± 63   | 535 ± 29   | 469 ± 65   |
| 219628_at   | WIG1    | p53 target zinc finger protein                                         | <b>-0.0247</b>   | <b>0.0197</b>     | <b>-0.0161</b>   | 0.4984            | 0.1305        | 794 ± 76   | 740 ± 108  | 725 ± 62   | 533 ± 61   |
| 202749_at   | WRB     | tryptophan rich basic protein                                          | <b>-0.0034</b>   | <b>0.0007</b>     | -0.2827          | <b>0.0453</b>     | <b>0.0028</b> | 3422 ± 298 | 3044 ± 155 | 2309 ± 141 | 2181 ± 295 |
| 201856_s_at | ZFR     | zinc finger RNA binding protein                                        | <b>-0.0286</b>   | 0.0984            | <b>-0.0272</b>   | 0.4674            | 0.1207        | 626 ± 51   | 574 ± 74   | 469 ± 29   | 513 ± 19   |
| 200828_s_at | ZNF207  | zinc finger protein 207                                                | <b>-0.0402</b>   | 0.5566            | <b>-0.0106</b>   | <b>0.0439</b>     | 0.2521        | 1262 ± 82  | 1123 ± 44  | 1074 ± 42  | 1195 ± 96  |
| 204812_at   | ZW10    | ZW10 homolog, centromere/kinetochore protein                           | <b>-0.0153</b>   | 0.0935            | <b>-0.0017</b>   | 0.1761            | 0.1609        | 548 ± 22   | 514 ± 26   | 447 ± 36   | 490 ± 40   |
