# Supplementary material
Source: PubMed Central journal article supplement (PMC357071)
Supplement: pnas_0308512100v2_1.pdf [file pnas_0308512100v2_1.pdf]

**Upregulated**

| Probe set   | Name     | Description                                            | NFT <sub>0</sub> | MMSE <sub>0</sub> | NFT <sub>1</sub> | MMSE <sub>1</sub> | ANOVA         | Control    | Incipient  | Moderate   | Severe     |
|-------------|----------|--------------------------------------------------------|------------------|-------------------|------------------|-------------------|---------------|------------|------------|------------|------------|
| 214298_x_at | 37870    | septin 6                                               | <b>0.0000</b>    | <b>-0.0018</b>    | -0.3994          | -0.1260           | <b>0.0148</b> | 178 ± 8    | 186 ± 10   | 228 ± 20   | 279 ± 38   |
| 205056_s_at | A        | protein "A"                                            | <b>0.0410</b>    | -0.3550           | 0.4930           | <b>0.0523</b>     | 0.4430        | 430 ± 38   | 443 ± 116  | 493 ± 21   | 563 ± 41   |
| 205986_at   | AATK     | apoptosis-associated tyrosine kinase                   | <b>0.0229</b>    | <b>-0.0469</b>    | 0.0979           | -0.3946           | <b>0.0212</b> | 2012 ± 85  | 2454 ± 180 | 1958 ± 129 | 3320 ± 611 |
| 204177_s_at | AB026190 | Kelch motif containing protein                         | <b>0.0017</b>    | <b>-0.0012</b>    | 0.0959           | <b>-0.0389</b>    | <b>0.0023</b> | 344 ± 23   | 396 ± 11   | 498 ± 32   | 504 ± 50   |
| 203505_at   | ABCA1    | ATP-binding cassette, sub-family A , member 1          | <b>0.0009</b>    | <b>-0.0024</b>    | <b>0.0432</b>    | -0.2938           | <b>0.0084</b> | 802 ± 124  | 1093 ± 209 | 1153 ± 127 | 2307 ± 574 |
| 212772_s_at | ABCA2    | ATP-binding cassette, sub-family A , member 2          | <b>0.0085</b>    | -0.0607           | 0.4103           | -0.1981           | 0.2286        | 2149 ± 243 | 2713 ± 235 | 3010 ± 268 | 3321 ± 773 |
| 203192_at   | ABCB6    | ATP-binding cassette, sub-family B , member 6          | <b>0.0382</b>    | -0.3080           | -0.4790          | 0.4942            | 0.3859        | 381 ± 19   | 390 ± 40   | 364 ± 33   | 452 ± 51   |
| 203981_s_at | ABCD4    | ATP-binding cassette, sub-family D , member 4          | 0.2780           | <b>-0.0112</b>    | 0.4061           | -0.0865           | 0.1593        | 316 ± 27   | 366 ± 25   | 341 ± 12   | 418 ± 54   |
| 202123_s_at | ABL1     | v-abl Abelson murine leukemia viral oncogene homolog 1 | <b>0.0018</b>    | <b>-0.0247</b>    | 0.4739           | 0.4913            | 0.0929        | 989 ± 118  | 1154 ± 138 | 1371 ± 137 | 1561 ± 257 |
| 210461_s_at | ABLIM1   | actin binding LIM protein 1                            | <b>0.0159</b>    | <b>-0.0266</b>    | -0.4038          | -0.2723           | 0.0624        | 96 ± 14    | 92 ± 20    | 132 ± 22   | 171 ± 31   |
| 202366_at   | ACADS    | acyl-Coenzyme A dehydrogenase, C-2 to C-3 short chain  | <b>0.0128</b>    | <b>-0.0019</b>    | 0.0607           | -0.1022           | <b>0.0042</b> | 161 ± 12   | 216 ± 16   | 253 ± 20   | 323 ± 53   |
| 203164_at   | ACATN    | acetyl-Coenzyme A transporter                          | 0.2331           | <b>-0.0035</b>    | -0.3973          | -0.0775           | 0.1115        | 343 ± 21   | 359 ± 14   | 382 ± 20   | 416 ± 28   |
| 204241_at   | ACOX3    | acyl-Coenzyme A oxidase 3, pristanoyl                  | 0.2933           | <b>-0.0340</b>    | 0.3973           | 0.1675            | 0.1455        | 274 ± 18   | 279 ± 25   | 304 ± 39   | 375 ± 43   |
| 207973_x_at | ACRV1    | acrosomal vesicle protein 1                            | 0.8153           | <b>-0.0215</b>    | <b>0.0500</b>    | -0.0634           | <b>0.0397</b> | 220 ± 14   | 280 ± 25   | 247 ± 23   | 321 ± 32   |
| 208223_s_at | ACVR1B   | activin A receptor, type IB                            | <b>0.0068</b>    | <b>-0.0026</b>    | -0.4471          | 0.4256            | <b>0.0045</b> | 79 ± 13    | 93 ± 7     | 93 ± 13    | 167 ± 27   |
| 207953_at   | AD7C-NTP | neuronal thread protein                                | <b>0.0006</b>    | <b>-0.0147</b>    | -0.3379          | -0.0562           | <b>0.0351</b> | 200 ± 17   | 235 ± 14   | 389 ± 71   | 383 ± 74   |
| 205745_x_at | ADAM17   | a disintegrin and metalloproteinase domain 17          | <b>0.0227</b>    | <b>-0.0249</b>    | <b>-0.0299</b>   | -0.4591           | 0.0691        | 406 ± 31   | 389 ± 7    | 481 ± 30   | 477 ± 29   |
| 207665_at   | ADAM21   | a disintegrin and metalloproteinase domain 21          | 0.1526           | <b>-0.0427</b>    | 0.4568           | 0.4805            | <b>0.0454</b> | 213 ± 22   | 281 ± 38   | 244 ± 25   | 334 ± 35   |
| 206134_at   | ADAMDEC1 | ADAM-like, decysin 1                                   | 0.0693           | <b>-0.0210</b>    | 0.2733           | -0.4496           | <b>0.0092</b> | 55 ± 5     | 69 ± 8     | 105 ± 15   | 89 ± 10    |
| 220287_at   | ADAMTS9  | a disintegrin-like and metalloprotease                 | 0.1781           | <b>-0.0340</b>    | 0.2568           | -0.0761           | 0.2487        | 303 ± 31   | 323 ± 32   | 329 ± 36   | 411 ± 55   |
| 220648_at   | ADAR3    | double-stranded RNA specific adenosine deaminase       | 0.0842           | <b>-0.0006</b>    | -0.1342          | 0.3729            | <b>0.0069</b> | 323 ± 56   | 316 ± 37   | 379 ± 45   | 545 ± 34   |
| 213217_at   | ADCY2    | adenylate cyclase 2                                    | <b>0.0034</b>    | <b>-0.0137</b>    | 0.4392           | 0.4272            | 0.0568        | 3323 ± 178 | 3330 ± 215 | 4453 ± 552 | 4496 ± 513 |
| 209320_at   | ADCY3    | adenylate cyclase 3                                    | 0.5995           | <b>-0.0159</b>    | 0.1650           | -0.2960           | 0.1846        | 543 ± 36   | 545 ± 39   | 622 ± 36   | 675 ± 74   |
| 203741_s_at | ADCY7    | adenylate cyclase 7                                    | <b>0.0464</b>    | <b>-0.0129</b>    | 0.1193           | <b>-0.0061</b>    | 0.1919        | 228 ± 33   | 311 ± 39   | 292 ± 20   | 340 ± 56   |
| 201753_s_at | ADD3     | adducin 3                                              | <b>0.0071</b>    | <b>-0.0032</b>    | <b>0.0287</b>    | -0.0699           | <b>0.0009</b> | 4514 ± 321 | 5928 ± 566 | 8335 ± 749 | 7237 ± 742 |
| 209613_s_at | ADH1B    | alcohol dehydrogenase IB , beta polypeptide            | <b>0.0069</b>    | <b>-0.0201</b>    | 0.2979           | -0.0827           | 0.1403        | 48 ± 7     | 48 ± 10    | 79 ± 20    | 87 ± 16    |
| 201792_at   | AEBP1    | AE binding protein 1                                   | <b>0.0001</b>    | <b>-0.0004</b>    | -0.1628          | -0.2006           | <b>0.0085</b> | 293 ± 46   | 305 ± 48   | 530 ± 72   | 643 ± 123  |
| 218735_s_at | AF020591 | zinc finger protein                                    | <b>0.0143</b>    | -0.2315           | <b>0.0427</b>    | -0.0670           | 0.3397        | 496 ± 25   | 506 ± 21   | 596 ± 66   | 564 ± 46   |
| 206840_at   | AFM      | afamin                                                 | <b>0.0374</b>    | <b>-0.0301</b>    | 0.1782           | 0.4366            | <b>0.0124</b> | 98 ± 17    | 119 ± 18   | 105 ± 9    | 179 ± 22   |
| 221788_at   | AGM1     | N-acetylglucosamine-phosphate mutase                   | 0.8955           | <b>-0.0164</b>    | -0.1862          | <b>-0.0265</b>    | 0.3263        | 259 ± 27   | 313 ± 56   | 322 ± 39   | 400 ± 80   |
| 219792_at   | AGMAT    | agmatine ureohydrolase                                 | 0.0777           | <b>-0.0254</b>    | -0.3096          | -0.4473           | 0.0649        | 214 ± 21   | 224 ± 24   | 229 ± 15   | 306 ± 36   |
| 32837_at    | AGPAT2   | 1-acylglycerol-3-phosphate O-acyltransferase 2         | 0.2503           | <b>-0.0078</b>    | 0.1110           | -0.0851           | 0.0766        | 468 ± 24   | 490 ± 44   | 556 ± 32   | 637 ± 79   |
| 217419_x_at | AGRN     | agrin                                                  | <b>0.0265</b>    | -0.3160           | 0.0613           | -0.3947           | 0.6315        | 554 ± 44   | 633 ± 80   | 652 ± 36   | 697 ± 143  |
| 205357_s_at | AGTR1    | angiotensin II receptor, type 1                        | <b>0.0017</b>    | <b>-0.0003</b>    | 0.1517           | <b>-0.0147</b>    | <b>0.0075</b> | 79 ± 6     | 105 ± 14   | 122 ± 10   | 138 ± 14   |
| 213592_at   | AGTRL1   | angiotensin II receptor-like 1                         | <b>0.0444</b>    | <b>-0.0459</b>    | <b>0.0168</b>    | <b>-0.0327</b>    | <b>0.0253</b> | 897 ± 172  | 1599 ± 422 | 3549 ± 921 | 2433 ± 622 |
| 212543_at   | AIM1     | absent in melanoma 1                                   | 0.1970           | <b>-0.0054</b>    | <b>0.0184</b>    | -0.1655           | <b>0.0408</b> | 177 ± 19   | 215 ± 22   | 218 ± 13   | 289 ± 44   |
| 202587_s_at | AK1      | adenylate kinase 1                                     | <b>0.0442</b>    | -0.0894           | 0.3108           | -0.2714           | 0.4005        | 1489 ± 121 | 1525 ± 133 | 1768 ± 241 | 1863 ± 205 |
| 212172_at   | AK2      | adenylate kinase 2                                     | <b>0.0417</b>    | -0.1628           | 0.0649           | -0.3466           | 0.1369        | 143 ± 15   | 134 ± 19   | 142 ± 20   | 243 ± 68   |
| 201674_s_at | AKAP1    | A kinase anchor protein 1                              | <b>0.0301</b>    | -0.8514           | 0.2896           | -0.2216           | 0.8298        | 584 ± 36   | 634 ± 55   | 655 ± 65   | 622 ± 77   |
| 222024_s_at | AKAP13   | A kinase anchor protein 13                             | <b>0.0059</b>    | <b>-0.0026</b>    | <b>0.0412</b>    | <b>-0.0187</b>    | <b>0.0097</b> | 441 ± 42   | 513 ± 52   | 641 ± 79   | 869 ± 138  |
| 209534_x_at | AKAP13   | A kinase anchor protein 13                             | <b>0.0005</b>    | <b>-0.0310</b>    | 0.2242           | -0.4919           | 0.0865        | 551 ± 31   | 553 ± 47   | 690 ± 70   | 746 ± 94   |

| Probe set   | Name    | Description                                          | NFT <sub>0</sub> | MMSE <sub>0</sub> | NFT <sub>1</sub> | MMSE <sub>1</sub> | ANOVA         | Control    | Incipient  | Moderate    | Severe      |
|-------------|---------|------------------------------------------------------|------------------|-------------------|------------------|-------------------|---------------|------------|------------|-------------|-------------|
| 215483_at   | AKAP9   | A kinase anchor protein 9                            | 0.1518           | <b>-0.0230</b>    | 0.4615           | <b>-0.0231</b>    | 0.0890        | 205 ± 45   | 275 ± 27   | 408 ± 75    | 354 ± 77    |
| 216594_x_at | AKR1C2  | aldo-keto reductase family 1, member C2              | 0.3738           | <b>-0.0407</b>    | <b>-0.0361</b>   | 0.1419            | 0.0685        | 726 ± 75   | 639 ± 50   | 792 ± 22    | 876 ± 50    |
| 209160_at   | AKR1C3  | aldo-keto reductase family 1, member C3              | 0.3544           | <b>-0.0094</b>    | -0.3514          | -0.4961           | <b>0.0263</b> | 352 ± 49   | 324 ± 33   | 575 ± 67    | 538 ± 98    |
| 219393_s_at | AKT3    | protein kinase B, gamma                              | <b>0.0257</b>    | -0.1261           | 0.0552           | 0.4652            | 0.1281        | 153 ± 15   | 199 ± 24   | 198 ± 24    | 243 ± 40    |
| 207016_s_at | ALDH1A2 | aldehyde dehydrogenase 1 family, member A2           | <b>0.0515</b>    | <b>-0.0053</b>    | <b>-0.0403</b>   | 0.0805            | <b>0.0055</b> | 212 ± 27   | 157 ± 19   | 400 ± 70    | 569 ± 138   |
| 202054_s_at | ALDH3A2 | aldehyde dehydrogenase 3 family, member A2           | 0.5623           | <b>-0.0027</b>    | <b>-0.0002</b>   | 0.2161            | <b>0.0473</b> | 868 ± 46   | 750 ± 56   | 1014 ± 52   | 1217 ± 226  |
| 214220_s_at | ALMS1   | Alstrom syndrome 1                                   | 0.0641           | <b>-0.0127</b>    | <b>0.0028</b>    | <b>-0.0399</b>    | 0.1605        | 160 ± 17   | 203 ± 18   | 228 ± 23    | 252 ± 52    |
| 214221_at   | ALMS1   | Alstrom syndrome 1                                   | <b>0.0201</b>    | <b>-0.0029</b>    | 0.3626           | 0.3114            | <b>0.0120</b> | 257 ± 22   | 256 ± 15   | 313 ± 25    | 369 ± 35    |
| 214707_x_at | ALMS1   | Alstrom syndrome 1                                   | <b>0.0006</b>    | <b>-0.0270</b>    | 0.4931           | <b>-0.0255</b>    | 0.0720        | 701 ± 38   | 892 ± 69   | 1091 ± 117  | 1316 ± 304  |
| 210170_at   | ALP     | alpha-actinin-2-associated LIM protein               | 0.0597           | <b>-0.0185</b>    | 0.0807           | 0.3478            | 0.1315        | 76 ± 8     | 102 ± 14   | 95 ± 6      | 141 ± 37    |
| 202125_s_at | ALS2CR3 | ALS 2 chromosome region, candidate 3                 | <b>0.0046</b>    | <b>-0.0159</b>    | 0.3688           | -0.1876           | <b>0.0515</b> | 1607 ± 144 | 1664 ± 150 | 2244 ± 194  | 2186 ± 295  |
| 203002_at   | AMOTL2  | angiomin like 2                                      | <b>0.0196</b>    | -0.0580           | 0.1666           | -0.1487           | 0.2241        | 847 ± 58   | 1017 ± 115 | 1077 ± 60   | 1222 ± 231  |
| 207992_s_at | AMPD3   | adenosine monophosphate deaminase                    | <b>0.0317</b>    | <b>-0.0129</b>    | 0.1057           | 0.3435            | <b>0.0281</b> | 569 ± 37   | 683 ± 134  | 645 ± 52    | 933 ± 100   |
| 205609_at   | ANGPT1  | angiopoietin 1                                       | 0.0907           | <b>-0.0043</b>    | 0.1258           | <b>-0.0190</b>    | 0.1030        | 346 ± 42   | 388 ± 76   | 523 ± 89    | 556 ± 62    |
| 205608_s_at | ANGPT1  | angiopoietin 1                                       | <b>0.0010</b>    | <b>-0.0019</b>    | -0.4103          | 0.3450            | <b>0.0057</b> | 301 ± 35   | 294 ± 37   | 363 ± 26    | 469 ± 38    |
| 213004_at   | ANGPTL2 | angiopoietin-like 2                                  | <b>0.0000</b>    | <b>-0.0393</b>    | <b>0.0122</b>    | -0.1088           | <b>0.0460</b> | 98 ± 8     | 133 ± 15   | 161 ± 8     | 173 ± 35    |
| 201305_x_at | ANP32B  | acidic nuclear p32 family, member B                  | <b>0.0029</b>    | <b>-0.0014</b>    | 0.2229           | <b>-0.0488</b>    | <b>0.0179</b> | 720 ± 86   | 850 ± 111  | 1215 ± 197  | 1253 ± 114  |
| 201306_s_at | ANP32B  | acidic nuclear p32 family, member B                  | <b>0.0012</b>    | <b>-0.0029</b>    | -0.4955          | -0.2924           | <b>0.0171</b> | 4717 ± 455 | 4986 ± 670 | 5555 ± 604  | 8019 ± 1168 |
| 201012_at   | ANXA1   | annexin A1                                           | <b>0.0169</b>    | <b>-0.0043</b>    | 0.3733           | -0.2274           | 0.0704        | 309 ± 36   | 327 ± 48   | 654 ± 176   | 914 ± 296   |
| 201590_x_at | ANXA2   | annexin A2                                           | 0.0805           | <b>-0.0024</b>    | 0.2680           | -0.4418           | <b>0.0493</b> | 1027 ± 111 | 1161 ± 103 | 1347 ± 154  | 1564 ± 152  |
| 213503_x_at | ANXA2   | annexin A2                                           | 0.1193           | <b>-0.0147</b>    | <b>-0.0311</b>   | 0.4328            | 0.0689        | 1001 ± 119 | 878 ± 75   | 1011 ± 143  | 1423 ± 200  |
| 210427_x_at | ANXA2   | annexin A2                                           | <b>0.0039</b>    | <b>-0.0007</b>    | 0.2420           | -0.0920           | <b>0.0347</b> | 951 ± 63   | 1032 ± 98  | 1252 ± 160  | 1456 ± 144  |
| 207064_s_at | AOC2    | amine oxidase, copper containing 2                   | 0.1172           | <b>-0.0414</b>    | 0.0591           | -0.2237           | <b>0.0121</b> | 216 ± 16   | 286 ± 25   | 225 ± 16    | 335 ± 43    |
| 200845_s_at | AOP2    | acidic calcium-independent phospholipase A2          | 0.0819           | <b>-0.0387</b>    | <b>0.0292</b>    | -0.4848           | <b>0.0547</b> | 2495 ± 180 | 2674 ± 239 | 4147 ± 588  | 3524 ± 606  |
| 205423_at   | AP1B1   | adaptor-related protein complex 1, beta 1 subunit    | <b>0.0366</b>    | -0.1486           | -0.3909          | -0.2217           | 0.2246        | 340 ± 35   | 314 ± 32   | 424 ± 34    | 407 ± 64    |
| 202398_at   | AP3S2   | adaptor-related protein complex 3, sigma 2 subunit   | <b>0.0262</b>    | <b>-0.0250</b>    | -0.4886          | -0.4378           | 0.1517        | 70 ± 13    | 81 ± 20    | 88 ± 23     | 134 ± 24    |
| 215148_s_at | APBA3   | a beta precursor protein-binding, family A, member 3 | <b>0.0481</b>    | -0.1362           | -0.2320          | 0.2067            | 0.1586        | 469 ± 41   | 464 ± 73   | 479 ± 49    | 663 ± 108   |
| 218555_at   | APC2    | anaphase-promoting complex subunit 2                 | <b>0.0418</b>    | -0.0709           | 0.1166           | 0.1431            | 0.0825        | 620 ± 120  | 544 ± 79   | 592 ± 41    | 1054 ± 246  |
| 220237_at   | APG3    | autophagy Apg3p/Aut1p-like                           | 0.0750           | <b>-0.0209</b>    | <b>0.0384</b>    | -0.1811           | <b>0.0440</b> | 60 ± 7     | 50 ± 9     | 91 ± 10     | 127 ± 38    |
| 204902_s_at | Apg4B   | KIAA0943 protein                                     | 0.6193           | <b>-0.0411</b>    | -0.1332          | -0.1610           | 0.0855        | 353 ± 38   | 304 ± 54   | 328 ± 25    | 470 ± 63    |
| 207175_at   | APM1    | adipose most abundant gene transcript 1              | 0.0615           | <b>-0.0426</b>    | 0.4119           | 0.3825            | 0.3306        | 83 ± 12    | 91 ± 19    | 111 ± 19    | 133 ± 32    |
| 207158_at   | APOBEC1 | apolipoprotein B mRNA editing enzyme, catalytic 1    | 0.2954           | <b>-0.0074</b>    | -0.2239          | -0.2207           | <b>0.0451</b> | 157 ± 27   | 160 ± 29   | 155 ± 8     | 263 ± 43    |
| 213553_x_at | APOC1   | apolipoprotein C-I                                   | 0.2519           | <b>-0.0489</b>    | <b>0.0396</b>    | -0.3988           | 0.1150        | 1261 ± 161 | 1713 ± 237 | 1606 ± 135  | 1865 ± 143  |
| 206738_at   | APOC4   | apolipoprotein C-IV                                  | <b>0.0014</b>    | <b>-0.0267</b>    | <b>0.0024</b>    | -0.2108           | <b>0.0482</b> | 179 ± 11   | 235 ± 25   | 281 ± 13    | 305 ± 60    |
| 221013_s_at | APOL2   | apolipoprotein L, 2                                  | 0.1087           | <b>-0.0013</b>    | 0.0910           | <b>-0.0378</b>    | <b>0.0066</b> | 162 ± 20   | 180 ± 13   | 256 ± 17    | 250 ± 30    |
| 211277_x_at | APP     | a beta precursor protein                             | <b>0.0065</b>    | <b>-0.0024</b>    | <b>0.0521</b>    | <b>-0.0046</b>    | <b>0.0319</b> | 345 ± 18   | 385 ± 28   | 458 ± 24    | 573 ± 108   |
| 218527_at   | APTX    | aprataxin                                            | <b>0.0130</b>    | -0.3520           | -0.3766          | 0.4755            | 0.8193        | 700 ± 39   | 688 ± 57   | 730 ± 57    | 761 ± 79    |
| 209047_at   | AQP1    | aquaporin 1                                          | 0.1381           | <b>-0.0152</b>    | 0.4508           | -0.3638           | 0.1509        | 3845 ± 804 | 3974 ± 762 | 5294 ± 1026 | 6422 ± 799  |
| 216219_at   | AQP6    | aquaporin 6, kidney specific                         | 0.1343           | <b>-0.0479</b>    | 0.2267           | -0.1735           | 0.1153        | 339 ± 30   | 340 ± 18   | 349 ± 40    | 482 ± 77    |
| 203025_at   | ARD1    | ARD1 homolog, N-acetyltransferase                    | <b>0.0212</b>    | -0.0851           | 0.3202           | -0.4038           | 0.2991        | 525 ± 41   | 498 ± 49   | 577 ± 55    | 692 ± 126   |
| 214182_at   | ARF6    | ADP-ribosylation factor 6                            | 0.1885           | <b>-0.0027</b>    | 0.3874           | <b>-0.0262</b>    | 0.0753        | 143 ± 10   | 128 ± 26   | 181 ± 23    | 190 ± 11    |
| 217888_s_at | ARFGAP1 | ADP-ribosylation factor GTPase activating protein 1  | 0.2345           | <b>-0.0486</b>    | 0.1206           | <b>-0.0101</b>    | 0.3263        | 602 ± 43   | 658 ± 36   | 744 ± 76    | 735 ± 84    |

| Probe set   | Name      | Description                                            | NFT <sub>0</sub> | MMSE <sub>0</sub> | NFT <sub>1</sub> | MMSE <sub>1</sub> | ANOVA         | Control    | Incipient  | Moderate   | Severe     |
|-------------|-----------|--------------------------------------------------------|------------------|-------------------|------------------|-------------------|---------------|------------|------------|------------|------------|
| 203945_at   | ARG2      | arginase, type II                                      | <b>0.0321</b>    | <b>-0.0063</b>    | 0.2004           | -0.4407           | <b>0.0071</b> | 320 ± 20   | 355 ± 24   | 371 ± 20   | 492 ± 57   |
| 221790_s_at | ARH       | LDL receptor adaptor protein                           | <b>0.0246</b>    | -0.0754           | -0.3521          | 0.4210            | 0.1923        | 260 ± 42   | 204 ± 42   | 339 ± 53   | 460 ± 150  |
| 57082_at    | ARH       | LDL receptor adaptor protein                           | <b>0.0483</b>    | <b>-0.0506</b>    | -0.3702          | 0.3490            | 0.0559        | 422 ± 44   | 473 ± 114  | 441 ± 66   | 799 ± 173  |
| 202117_at   | ARHGAP1   | Rho GTPase activating protein 1                        | <b>0.0243</b>    | -0.0643           | 0.1319           | 0.3211            | 0.1404        | 2789 ± 229 | 3196 ± 376 | 3283 ± 271 | 4023 ± 573 |
| 206167_s_at | ARHGAP6   | Rho GTPase activating protein 6                        | 0.1337           | <b>-0.0476</b>    | 0.1965           | 0.2431            | 0.1326        | 348 ± 31   | 377 ± 58   | 457 ± 20   | 486 ± 66   |
| 216620_s_at | ARHGEF10  | Rho guanine nucleotide exchange factor 10              | <b>0.0020</b>    | <b>-0.0082</b>    | 0.2725           | -0.4057           | <b>0.0305</b> | 654 ± 67   | 765 ± 91   | 946 ± 70   | 921 ± 69   |
| 217348_x_at | ARHGEF15  | Rho guanine nucleotide exchange factor 15              | 0.5720           | <b>-0.0164</b>    | <b>0.0480</b>    | <b>-0.0151</b>    | 0.0821        | 199 ± 18   | 235 ± 31   | 226 ± 24   | 295 ± 30   |
| 208009_s_at | ARHGEF16  | Rho guanine exchange factor 16                         | <b>0.0199</b>    | <b>-0.0043</b>    | 0.2112           | -0.2052           | <b>0.0149</b> | 173 ± 25   | 176 ± 17   | 276 ± 27   | 291 ± 46   |
| 201230_s_at | ARIH2     | ariadne homolog 2                                      | 0.2864           | <b>-0.0309</b>    | -0.3318          | 0.2833            | 0.0939        | 932 ± 32   | 906 ± 52   | 958 ± 55   | 1129 ± 107 |
| 201954_at   | ARPC1B    | actin related protein 2/3 complex, subunit 1B, 41kDa   | <b>0.0177</b>    | <b>-0.0194</b>    | <b>0.0218</b>    | -0.2238           | 0.1227        | 394 ± 26   | 492 ± 59   | 536 ± 56   | 553 ± 53   |
| 222047_s_at | ARS2      | arsenate resistance protein ARS2                       | <b>0.0099</b>    | <b>-0.0053</b>    | 0.4491           | 0.4489            | 0.0706        | 1624 ± 85  | 1755 ± 149 | 2029 ± 163 | 2187 ± 203 |
| 210385_s_at | ARTS-1    | type 1 TNF receptor shedding aminopeptidase regulator  | 0.1149           | <b>-0.0082</b>    | 0.3852           | <b>-0.0417</b>    | 0.1942        | 187 ± 26   | 199 ± 29   | 215 ± 10   | 267 ± 36   |
| 213702_x_at | ASAH1     | N-acylsphingosine amidohydrolase 1                     | 0.6440           | <b>-0.0304</b>    | 0.4006           | -0.4250           | 0.2972        | 5013 ± 132 | 4860 ± 196 | 5092 ± 270 | 5595 ± 425 |
| 212818_s_at | ASB1      | ankyrin repeat and SOCS box-containing 1               | 0.1412           | <b>-0.0108</b>    | 0.3778           | 0.3963            | 0.0806        | 821 ± 40   | 783 ± 30   | 853 ± 51   | 999 ± 91   |
| 209988_s_at | ASCL1     | achaete-scute complex-like 1                           | 0.3369           | <b>-0.0183</b>    | 0.3420           | -0.1386           | 0.1160        | 772 ± 52   | 764 ± 56   | 984 ± 92   | 969 ± 108  |
| 209987_s_at | ASCL1     | achaete-scute complex-like 1                           | <b>0.0416</b>    | <b>-0.0042</b>    | <b>0.0197</b>    | -0.1938           | <b>0.0184</b> | 353 ± 37   | 537 ± 111  | 502 ± 78   | 832 ± 153  |
| 204244_s_at | ASK       | activator of S phase kinase                            | 0.8717           | <b>-0.0304</b>    | <b>0.0294</b>    | -0.2094           | 0.3078        | 107 ± 7    | 97 ± 10    | 110 ± 7    | 126 ± 14   |
| 208033_s_at | ATBF1     | AT-binding transcription factor 1                      | <b>0.0526</b>    | <b>-0.0240</b>    | 0.0612           | -0.0685           | <b>0.0415</b> | 140 ± 25   | 176 ± 20   | 243 ± 23   | 206 ± 33   |
| 204998_s_at | ATF5      | activating transcription factor 5                      | <b>0.0079</b>    | -0.0980           | 0.1389           | 0.4472            | 0.0816        | 216 ± 19   | 280 ± 46   | 269 ± 10   | 320 ± 29   |
| 212096_s_at | ATIP1     | AT2 receptor-interacting protein 1                     | 0.3979           | <b>-0.0223</b>    | <b>-0.0549</b>   | -0.3781           | 0.2176        | 2652 ± 258 | 2649 ± 463 | 3344 ± 306 | 3342 ± 227 |
| 213238_at   | ATP10D    | ATPase, Class V, type 10D                              | 0.1324           | <b>-0.0307</b>    | <b>0.0384</b>    | -0.2089           | 0.2592        | 289 ± 19   | 297 ± 28   | 317 ± 35   | 370 ± 39   |
| 214149_s_at | ATP6V0E   | ATPase, H+ transporting, lysosomal 9kDa, V0 subunit e  | 0.0989           | <b>-0.0102</b>    | -0.2467          | -0.0745           | 0.0973        | 344 ± 27   | 345 ± 61   | 368 ± 6    | 493 ± 59   |
| 214150_x_at | ATP6V0E   | ATPase, H+ transporting, lysosomal 9kDa, V0 subunit e  | <b>0.0086</b>    | <b>-0.0001</b>    | -0.4607          | -0.1644           | <b>0.0069</b> | 3051 ± 283 | 2997 ± 267 | 3623 ± 256 | 4448 ± 364 |
| 214923_at   | ATP6V1D   | ATPase, H+ transporting, lysosomal 34kDa, V1 subunit D | <b>0.0084</b>    | <b>-0.0074</b>    | 0.1493           | <b>-0.0531</b>    | <b>0.0149</b> | 340 ± 17   | 392 ± 39   | 381 ± 22   | 536 ± 72   |
| 205197_s_at | ATP7A     | ATPase, Cu++ transporting, alpha polypeptide           | 0.1930           | <b>-0.0192</b>    | 0.2878           | 0.4453            | <b>0.0270</b> | 122 ± 19   | 115 ± 22   | 111 ± 12   | 195 ± 28   |
| 205198_s_at | ATP7A     | ATPase, Cu++ transporting, alpha polypeptide           | <b>0.0026</b>    | <b>-0.0015</b>    | 0.1093           | -0.0686           | <b>0.0141</b> | 232 ± 19   | 276 ± 21   | 297 ± 17   | 365 ± 47   |
| 214594_x_at | ATP8B1    | ATPase, Class I, type 8B, member 1                     | <b>0.0051</b>    | <b>-0.0400</b>    | 0.2453           | <b>-0.0306</b>    | 0.0561        | 1259 ± 205 | 1462 ± 119 | 2399 ± 338 | 2176 ± 557 |
| 206251_s_at | AVPR1A    | arginine vasopressin receptor 1A                       | <b>0.0103</b>    | <b>-0.0048</b>    | <b>-0.0548</b>   | 0.2142            | <b>0.0134</b> | 54 ± 4     | 52 ± 8     | 68 ± 11    | 101 ± 17   |
| 209309_at   | AZGP1     | alpha-2-glycoprotein 1, zinc                           | 0.1755           | <b>-0.0020</b>    | -0.1857          | -0.1359           | 0.0582        | 148 ± 32   | 153 ± 22   | 250 ± 71   | 307 ± 30   |
| 209413_at   | B4GALT2   | 1,4-galactosyltransferase, polypeptide 2               | <b>0.0150</b>    | -0.2865           | -0.3149          | <b>0.0217</b>     | 0.2782        | 637 ± 30   | 571 ± 77   | 710 ± 42   | 764 ± 116  |
| 220974_x_at | BA108L7.2 | similar to rat tricarboxylate carrier-like protein     | <b>0.0450</b>    | -0.8301           | 0.1331           | 0.4391            | 0.1871        | 1030 ± 60  | 1094 ± 91  | 1268 ± 92  | 1085 ± 83  |
| 221234_s_at | BACH2     | basic leucine zipper transcription factor 2            | 0.1147           | <b>-0.0124</b>    | 0.4399           | -0.4112           | 0.1052        | 314 ± 25   | 350 ± 36   | 366 ± 24   | 424 ± 38   |
| 209364_at   | BAD       | BCL2-antagonist of cell death                          | <b>0.0183</b>    | <b>-0.0380</b>    | 0.2296           | 0.2838            | 0.2043        | 544 ± 37   | 561 ± 60   | 680 ± 49   | 749 ± 140  |
| 202666_s_at | BAF53A    | BAF53                                                  | 0.6228           | <b>-0.0222</b>    | -0.4574          | -0.1521           | 0.2152        | 235 ± 30   | 269 ± 26   | 314 ± 41   | 314 ± 22   |
| 202387_at   | BAG1      | BCL2-associated athanogene                             | 0.1238           | <b>-0.0437</b>    | 0.1509           | <b>-0.0545</b>    | 0.2868        | 746 ± 29   | 745 ± 68   | 767 ± 58   | 876 ± 56   |
| 213105_s_at | BAIAP3    | BAI1-associated protein 3                              | 0.1084           | <b>-0.0263</b>    | <b>0.0289</b>    | -0.4828           | 0.1003        | 312 ± 19   | 353 ± 48   | 382 ± 25   | 433 ± 42   |
| 219966_x_at | BANP      | BTG3 associated nuclear protein                        | <b>0.0530</b>    | <b>-0.0020</b>    | -0.1251          | -0.3183           | <b>0.0276</b> | 525 ± 24   | 452 ± 75   | 495 ± 59   | 801 ± 140  |
| 217986_s_at | BAZ1A     | bromodomain adjacent to zinc finger domain, 1A         | 0.4382           | <b>-0.0466</b>    | -0.1131          | -0.3254           | 0.5147        | 191 ± 29   | 174 ± 24   | 201 ± 23   | 238 ± 37   |
| 201353_s_at | BAZ2A     | bromodomain adjacent to zinc finger domain, 2A         | <b>0.0022</b>    | -0.1658           | -0.0797          | -0.1746           | 0.3146        | 275 ± 31   | 246 ± 16   | 376 ± 41   | 362 ± 103  |
| 203080_s_at | BAZ2B     | bromodomain adjacent to zinc finger domain, 2B         | <b>0.0015</b>    | <b>-0.0049</b>    | -0.2754          | -0.2383           | 0.0749        | 1215 ± 117 | 1277 ± 148 | 1528 ± 109 | 1748 ± 230 |
| 214139_at   | BCAA      | RBP1-like protein                                      | 0.8617           | <b>-0.0325</b>    | -0.4738          | -0.3532           | 0.2877        | 133 ± 12   | 139 ± 19   | 149 ± 13   | 178 ± 24   |
| 221623_at   | BCAN      | chondroitin sulfate proteoglycan BEHAB/brevican        | <b>0.0537</b>    | <b>-0.0052</b>    | -0.4303          | -0.4111           | 0.0674        | 378 ± 29   | 374 ± 31   | 496 ± 63   | 529 ± 58   |

| Probe set   | Name   | Description                                      | NFT <sub>0</sub> | MMSE <sub>0</sub> | NFT <sub>1</sub> | MMSE <sub>1</sub> | ANOVA         | Control    | Incipient  | Moderate   | Severe      |
|-------------|--------|--------------------------------------------------|------------------|-------------------|------------------|-------------------|---------------|------------|------------|------------|-------------|
| 203576_at   | BCAT2  | branched chain aminotransferase 2, mitochondrial | <b>0.0107</b>    | <b>-0.0089</b>    | 0.4821           | -0.0728           | 0.1003        | 428 ± 50   | 453 ± 50   | 538 ± 35   | 585 ± 56    |
| 204872_at   | BCE-1  | BCE-1 protein                                    | 0.0987           | <b>-0.0433</b>    | -0.1150          | -0.2518           | 0.3342        | 2317 ± 176 | 2238 ± 310 | 2563 ± 176 | 2812 ± 276  |
| 203685_at   | BCL2   | B-cell CLL/lymphoma 2                            | <b>0.0206</b>    | <b>-0.0003</b>    | -0.1509          | 0.2748            | <b>0.0021</b> | 992 ± 105  | 821 ± 72   | 1193 ± 141 | 1514 ± 79   |
| 203140_at   | BCL6   | B-cell CLL/lymphoma 6                            | 0.0984           | <b>-0.0029</b>    | -0.1477          | -0.1755           | 0.0958        | 3035 ± 407 | 3028 ± 315 | 3862 ± 668 | 4927 ± 811  |
| 210679_x_at | BCL7A  | B-cell CLL/lymphoma 7A                           | <b>0.0250</b>    | <b>-0.0016</b>    | <b>0.0430</b>    | -0.0731           | <b>0.0023</b> | 744 ± 103  | 784 ± 87   | 1431 ± 127 | 1264 ± 199  |
| 218056_at   | BFAR   | bifunctional apoptosis regulator                 | <b>0.0001</b>    | <b>-0.0056</b>    | -0.3329          | 0.4813            | <b>0.0177</b> | 425 ± 21   | 395 ± 9    | 490 ± 39   | 590 ± 71    |
| 206956_at   | BGLAP  | bone gamma-carboxyglutamate protein              | <b>0.0015</b>    | -0.1275           | 0.2620           | -0.1442           | 0.4224        | 135 ± 18   | 150 ± 10   | 174 ± 25   | 190 ± 40    |
| 213905_x_at | BGN    | biglycan                                         | 0.1015           | <b>-0.0428</b>    | 0.1989           | -0.4413           | 0.1359        | 558 ± 72   | 738 ± 130  | 666 ± 74   | 892 ± 121   |
| 201261_x_at | BGN    | biglycan                                         | <b>0.0134</b>    | <b>-0.0022</b>    | <b>0.0318</b>    | <b>-0.0015</b>    | <b>0.0133</b> | 424 ± 33   | 557 ± 32   | 544 ± 47   | 717 ± 94    |
| 203278_s_at | BHC80  | BRAF35/HDAC2 complex                             | 0.0622           | <b>-0.0421</b>    | <b>-0.0035</b>   | 0.2633            | <b>0.0148</b> | 568 ± 62   | 407 ± 24   | 683 ± 70   | 666 ± 43    |
| 219902_at   | BHMT2  | betaine-homocysteine methyltransferase 2         | <b>0.0027</b>    | -0.7079           | 0.4322           | 0.0813            | 0.4214        | 75 ± 11    | 94 ± 22    | 131 ± 28   | 104 ± 31    |
| 214716_at   | BIKE   | BMP-2 inducible kinase                           | <b>0.0251</b>    | -0.5080           | 0.1746           | -0.3795           | 0.4249        | 96 ± 10    | 98 ± 7     | 122 ± 7    | 115 ± 21    |
| 202931_x_at | BIN1   | bridging integrator 1                            | <b>0.0006</b>    | -0.1185           | 0.2379           | -0.4332           | 0.2381        | 2447 ± 132 | 3112 ± 625 | 3191 ± 371 | 4028 ± 829  |
| 210201_x_at | BIN1   | bridging integrator 1                            | <b>0.0009</b>    | -0.1085           | 0.2134           | 0.3594            | 0.1475        | 4504 ± 315 | 5412 ± 892 | 5137 ± 456 | 7213 ± 1462 |
| 214439_x_at | BIN1   | bridging integrator 1                            | <b>0.0121</b>    | <b>-0.0210</b>    | 0.2010           | -0.3430           | 0.0882        | 2478 ± 189 | 2989 ± 282 | 3309 ± 329 | 4413 ± 963  |
| 214643_x_at | BIN1   | bridging integrator 1                            | <b>0.0007</b>    | <b>-0.0351</b>    | 0.3823           | -0.4420           | 0.0697        | 889 ± 59   | 1098 ± 196 | 1079 ± 142 | 1619 ± 310  |
| 222199_s_at | BIN3   | bridging integrator 3                            | <b>0.0243</b>    | -0.1004           | -0.0655          | -0.1899           | <b>0.0066</b> | 417 ± 14   | 384 ± 39   | 553 ± 44   | 463 ± 26    |
| 204861_s_at | BIRC1  | baculoviral IAP repeat-containing 1              | <b>0.0089</b>    | <b>-0.0287</b>    | 0.0822           | -0.2118           | 0.0917        | 235 ± 39   | 308 ± 38   | 323 ± 52   | 439 ± 85    |
| 202076_at   | BIRC2  | baculoviral IAP repeat-containing 2              | 0.1764           | <b>-0.0004</b>    | -0.2373          | -0.2328           | <b>0.0047</b> | 1322 ± 44  | 1230 ± 81  | 1333 ± 92  | 1672 ± 103  |
| 219520_s_at | BM042  | uncharacterized bone marrow protein BM042        | 0.1508           | <b>-0.0118</b>    | 0.3688           | -0.1907           | 0.0557        | 675 ± 74   | 871 ± 109  | 841 ± 46   | 1007 ± 98   |
| 208292_at   | BMP10  | bone morphogenetic protein 10                    | 0.1511           | <b>-0.0399</b>    | <b>-0.0343</b>   | 0.2072            | 0.1133        | 182 ± 18   | 157 ± 14   | 198 ± 18   | 233 ± 30    |
| 213578_at   | BMPR1A | bone morphogenetic protein receptor, type IA     | 0.1070           | <b>-0.0081</b>    | 0.4084           | -0.2047           | 0.1331        | 558 ± 47   | 601 ± 38   | 716 ± 85   | 769 ± 94    |
| 215016_x_at | BPAG1  | bullous pemphigoid antigen 1, 230/240kDa         | <b>0.0534</b>    | <b>-0.0039</b>    | -0.4014          | -0.2492           | <b>0.0282</b> | 5282 ± 187 | 5147 ± 325 | 6388 ± 444 | 6107 ± 310  |
| 212254_s_at | BPAG1  | bullous pemphigoid antigen 1, 230/240kDa         | 0.0744           | <b>-0.0088</b>    | 0.3068           | -0.0936           | 0.0654        | 5158 ± 301 | 5655 ± 403 | 6553 ± 553 | 6347 ± 288  |
| 220142_at   | BRAL1  | brain link protein-1                             | <b>0.0405</b>    | <b>-0.0038</b>    | -0.1426          | 0.3367            | <b>0.0011</b> | 510 ± 40   | 372 ± 71   | 446 ± 41   | 888 ± 149   |
| 213473_at   | BRAP   | BRCA1 associated protein                         | <b>0.0364</b>    | <b>-0.0024</b>    | <b>0.0192</b>    | <b>-0.0153</b>    | <b>0.0087</b> | 177 ± 16   | 231 ± 19   | 241 ± 11   | 253 ± 17    |
| 41512_at    | BRAP   | BRCA1 associated protein                         | <b>0.0202</b>    | <b>-0.0068</b>    | 0.0881           | -0.1793           | <b>0.0154</b> | 198 ± 6    | 204 ± 14   | 250 ± 18   | 259 ± 22    |
| 204531_s_at | BRCA1  | breast cancer 1, early onset                     | <b>0.0108</b>    | -0.0747           | 0.2649           | 0.3185            | 0.1295        | 94 ± 11    | 128 ± 23   | 149 ± 22   | 154 ± 24    |
| 204520_x_at | BRD1   | bromodomain containing 1                         | 0.1618           | <b>-0.0103</b>    | 0.2763           | <b>-0.0170</b>    | <b>0.0053</b> | 556 ± 49   | 617 ± 46   | 776 ± 16   | 675 ± 36    |
| 214911_s_at | BRD2   | bromodomain containing 2                         | <b>0.0253</b>    | <b>-0.0489</b>    | -0.4998          | 0.4433            | 0.2672        | 1066 ± 126 | 1052 ± 94  | 1268 ± 111 | 1341 ± 130  |
| 203825_at   | BRD3   | bromodomain containing 3                         | <b>0.0019</b>    | <b>-0.0499</b>    | 0.1745           | -0.3258           | 0.1166        | 1333 ± 129 | 1593 ± 221 | 2030 ± 210 | 2257 ± 525  |
| 202102_s_at | BRD4   | bromodomain containing 4                         | <b>0.0008</b>    | -0.2748           | 0.2483           | 0.2147            | 0.3608        | 1564 ± 94  | 1513 ± 146 | 1805 ± 190 | 1884 ± 237  |
| 202103_at   | BRD4   | bromodomain containing 4                         | <b>0.0042</b>    | <b>-0.0008</b>    | 0.4088           | -0.2915           | <b>0.0054</b> | 358 ± 36   | 338 ± 19   | 434 ± 27   | 520 ± 46    |
| 204481_at   | BRPF1  | bromodomain and PHD finger containing, 1         | <b>0.0119</b>    | <b>-0.0021</b>    | 0.3547           | -0.1542           | <b>0.0183</b> | 256 ± 38   | 308 ± 40   | 316 ± 25   | 456 ± 63    |
| 207369_at   | BRS3   | bombesin-like receptor 3                         | 0.0584           | <b>-0.0210</b>    | <b>0.0075</b>    | -0.0861           | 0.0734        | 119 ± 14   | 145 ± 15   | 163 ± 26   | 210 ± 32    |
| 203542_s_at | BTEB1  | basic transcription element binding protein 1    | <b>0.0045</b>    | <b>-0.0004</b>    | -0.3359          | -0.0642           | <b>0.0033</b> | 493 ± 48   | 485 ± 59   | 611 ± 49   | 857 ± 117   |
| 201236_s_at | BTG2   | BTG family, member 2                             | 0.0738           | <b>-0.0134</b>    | -0.3544          | -0.4104           | 0.0727        | 772 ± 86   | 791 ± 44   | 809 ± 50   | 1051 ± 114  |
| 205548_s_at | BTG3   | BTG family, member 3                             | 0.3501           | <b>-0.0034</b>    | -0.2933          | -0.4369           | <b>0.0160</b> | 603 ± 48   | 641 ± 84   | 620 ± 48   | 975 ± 137   |
| 213134_x_at | BTG3   | BTG family, member 3                             | 0.1027           | <b>-0.0115</b>    | 0.4256           | -0.1352           | <b>0.0321</b> | 625 ± 28   | 826 ± 69   | 790 ± 80   | 977 ± 118   |
| 215425_at   | BTG3   | BTG family, member 3                             | <b>0.0290</b>    | <b>-0.0044</b>    | 0.0825           | 0.4505            | <b>0.0091</b> | 92 ± 6     | 120 ± 15   | 135 ± 16   | 175 ± 26    |
| 204821_at   | BTN3A3 | butyrophilin, subfamily 3, member A3             | 0.4096           | <b>-0.0381</b>    | 0.4254           | -0.1324           | 0.3087        | 96 ± 18    | 93 ± 20    | 127 ± 16   | 146 ± 33    |
| 217207_s_at | BTNL3  | butyrophilin-like 3                              | <b>0.0425</b>    | <b>-0.0474</b>    | -0.3797          | -0.1285           | 0.2296        | 302 ± 24   | 303 ± 34   | 323 ± 24   | 391 ± 48    |

| Probe set   | Name      | Description                            | NFT <sub>o</sub> | MMSE <sub>o</sub> | NFT <sub>i</sub> | MMSE <sub>i</sub> | ANOVA         | Control    | Incipient  | Moderate   | Severe     |
|-------------|-----------|----------------------------------------|------------------|-------------------|------------------|-------------------|---------------|------------|------------|------------|------------|
| 216091_s_at | BTRC      | beta-transducin repeat containing      | 0.1195           | <b>-0.0202</b>    | -0.2478          | 0.4764            | 0.0933        | 197 ± 18   | 189 ± 11   | 201 ± 13   | 247 ± 20   |
| 202096_s_at | BZRP      | benzodiazapine receptor                | 0.3296           | <b>-0.0440</b>    | -0.3461          | -0.2356           | 0.4039        | 627 ± 65   | 620 ± 74   | 674 ± 61   | 767 ± 59   |
| 217928_s_at | C11orf23  | chromosome 11 open reading frame 23    | 0.5503           | <b>-0.0417</b>    | -0.2945          | 0.4476            | 0.1577        | 617 ± 42   | 520 ± 25   | 624 ± 30   | 685 ± 69   |
| 204073_s_at | C11orf9   | chromosome 11 open reading frame 9     | <b>0.0046</b>    | <b>-0.0116</b>    | -0.4375          | 0.3976            | 0.0567        | 1722 ± 260 | 1813 ± 253 | 2488 ± 293 | 3448 ± 814 |
| 218374_s_at | C12orf4   | chromosome 12 open reading frame 4     | 0.3940           | <b>-0.0368</b>    | 0.2320           | -0.4711           | 0.1436        | 343 ± 13   | 323 ± 24   | 342 ± 17   | 403 ± 37   |
| 218183_at   | C16orf5   | chromosome 16 open reading frame 5     | <b>0.0024</b>    | <b>-0.0003</b>    | 0.4460           | -0.2017           | <b>0.0115</b> | 307 ± 23   | 318 ± 27   | 368 ± 25   | 505 ± 75   |
| 209574_s_at | C18orf1   | chromosome 18 open reading frame 1     | 0.8664           | <b>-0.0129</b>    | 0.4174           | -0.4672           | <b>0.0309</b> | 341 ± 12   | 330 ± 28   | 301 ± 13   | 479 ± 78   |
| 213390_at   | C19orf7   | chromosome 19 open reading frame 7     | <b>0.0015</b>    | -0.1056           | 0.1669           | -0.4800           | 0.2720        | 995 ± 72   | 1134 ± 143 | 1286 ± 121 | 1340 ± 210 |
| 209883_at   | C1orf17   | chromosome 1 open reading frame 17     | 0.3038           | <b>-0.0320</b>    | 0.4297           | 0.3759            | 0.2095        | 1089 ± 88  | 1156 ± 104 | 1180 ± 78  | 1396 ± 143 |
| 220992_s_at | C1orf25   | chromosome 1 open reading frame 25     | 0.7491           | <b>-0.0408</b>    | 0.3573           | <b>-0.0354</b>    | 0.1346        | 177 ± 12   | 194 ± 27   | 175 ± 8    | 234 ± 24   |
| 212067_s_at | C1R       | complement component 1, r subcomponent | 0.7171           | <b>-0.0331</b>    | -0.1028          | 0.3522            | 0.2474        | 287 ± 49   | 260 ± 41   | 283 ± 27   | 390 ± 58   |
| 208747_s_at | C1S       | complement component 1, s subcomponent | <b>0.0210</b>    | <b>-0.0118</b>    | -0.1632          | -0.1282           | <b>0.0419</b> | 442 ± 55   | 424 ± 54   | 793 ± 167  | 739 ± 120  |
| 207482_at   | C20orf10  | chromosome 20 open reading frame 10    | <b>0.0423</b>    | <b>-0.0337</b>    | 0.1532           | 0.3122            | <b>0.0355</b> | 149 ± 16   | 146 ± 19   | 168 ± 12   | 274 ± 61   |
| 206567_s_at | C20orf104 | chromosome 20 open reading frame 104   | <b>0.0457</b>    | -0.2828           | 0.4684           | 0.3248            | 0.3914        | 610 ± 43   | 643 ± 89   | 764 ± 60   | 682 ± 81   |
| 209422_at   | C20orf104 | chromosome 20 open reading frame 104   | 0.1491           | <b>-0.0113</b>    | <b>0.0243</b>    | <b>-0.0391</b>    | 0.1277        | 882 ± 55   | 1015 ± 77  | 1019 ± 38  | 1102 ± 76  |
| 209020_at   | C20orf111 | chromosome 20 open reading frame 111   | 0.1097           | <b>-0.0411</b>    | -0.2008          | 0.3022            | 0.1830        | 392 ± 14   | 373 ± 24   | 419 ± 30   | 461 ± 42   |
| 208880_s_at | C20orf14  | chromosome 20 open reading frame 14    | <b>0.0087</b>    | -0.7205           | <b>0.0539</b>    | 0.4275            | 0.6000        | 304 ± 26   | 385 ± 67   | 342 ± 28   | 421 ± 112  |
| 218010_x_at | C20orf149 | chromosome 20 open reading frame 149   | <b>0.0490</b>    | <b>-0.0527</b>    | 0.1466           | -0.4514           | 0.1982        | 683 ± 80   | 738 ± 77   | 806 ± 27   | 979 ± 168  |
| 210357_s_at | C20orf16  | chromosome 20 open reading frame 16    | <b>0.0002</b>    | <b>-0.0030</b>    | 0.2860           | -0.0934           | <b>0.0111</b> | 904 ± 84   | 1144 ± 80  | 1239 ± 89  | 1440 ± 166 |
| 207713_s_at | C20orf18  | chromosome 20 open reading frame 18    | <b>0.0038</b>    | <b>-0.0159</b>    | 0.2209           | -0.4076           | <b>0.0437</b> | 517 ± 35   | 540 ± 47   | 705 ± 48   | 755 ± 115  |
| 221827_at   | C20orf18  | chromosome 20 open reading frame 18    | <b>0.0144</b>    | <b>-0.0221</b>    | <b>0.0456</b>    | 0.2796            | <b>0.0226</b> | 430 ± 28   | 456 ± 22   | 456 ± 64   | 622 ± 19   |
| 218586_at   | C20orf20  | chromosome 20 open reading frame 20    | <b>0.0107</b>    | -0.4800           | 0.4614           | 0.4958            | 0.5419        | 379 ± 37   | 393 ± 45   | 458 ± 40   | 442 ± 61   |
| 219706_at   | C20orf29  | chromosome 20 open reading frame 29    | 0.4606           | <b>-0.0206</b>    | 0.1750           | -0.3770           | 0.0785        | 485 ± 19   | 480 ± 41   | 504 ± 31   | 628 ± 71   |
| 218089_at   | C20orf4   | chromosome 20 open reading frame 4     | 0.1009           | <b>-0.0044</b>    | -0.4318          | -0.3579           | <b>0.0095</b> | 622 ± 24   | 666 ± 40   | 680 ± 36   | 833 ± 62   |
| 218145_at   | C20orf97  | chromosome 20 open reading frame 97    | <b>0.0014</b>    | <b>-0.0047</b>    | 0.1287           | -0.3686           | <b>0.0052</b> | 327 ± 21   | 340 ± 31   | 314 ± 32   | 492 ± 56   |
| 203996_s_at | C21orf2   | chromosome 21 open reading frame 2     | <b>0.0190</b>    | <b>-0.0308</b>    | -0.3788          | 0.3050            | <b>0.0283</b> | 274 ± 27   | 257 ± 26   | 298 ± 18   | 412 ± 64   |
| 220543_at   | C21orf62  | chromosome 21 open reading frame 62    | 0.1357           | <b>-0.0059</b>    | 0.4862           | 0.1216            | <b>0.0030</b> | 125 ± 17   | 124 ± 14   | 127 ± 12   | 217 ± 26   |
| 220941_s_at | C21orf91  | chromosome 21 open reading frame 91    | <b>0.0011</b>    | <b>-0.0087</b>    | -0.1983          | -0.3222           | <b>0.0057</b> | 153 ± 26   | 151 ± 18   | 155 ± 11   | 302 ± 56   |
| 204402_at   | C22orf3   | chromosome 22 open reading frame 3     | <b>0.0378</b>    | -0.1521           | 0.3266           | -0.3165           | 0.5188        | 148 ± 12   | 152 ± 21   | 172 ± 20   | 184 ± 21   |
| 217622_at   | C22orf3   | chromosome 22 open reading frame 3     | <b>0.0401</b>    | <b>-0.0221</b>    | 0.0616           | <b>-0.0150</b>    | 0.0752        | 120 ± 10   | 142 ± 29   | 204 ± 35   | 241 ± 52   |
| 216305_s_at | C2orf3    | chromosome 2 open reading frame 3      | 0.1514           | <b>-0.0269</b>    | 0.0619           | -0.2066           | 0.1066        | 193 ± 12   | 256 ± 30   | 256 ± 20   | 278 ± 36   |
| 201298_s_at | C2orf6    | chromosome 2 open reading frame 6      | <b>0.0060</b>    | -0.1575           | -0.2365          | -0.2771           | 0.6045        | 307 ± 23   | 271 ± 37   | 304 ± 48   | 356 ± 60   |
| 214428_x_at | C4A       | complement component 4A                | <b>0.0169</b>    | <b>-0.0024</b>    | -0.4946          | -0.1759           | <b>0.0361</b> | 2009 ± 348 | 2233 ± 417 | 2694 ± 281 | 3836 ± 692 |
| 208451_s_at | C4B       | complement component 4B                | <b>0.0417</b>    | <b>-0.0115</b>    | 0.4895           | 0.3056            | <b>0.0518</b> | 2358 ± 463 | 1849 ± 298 | 2910 ± 305 | 3553 ± 440 |
| 205500_at   | C5        | complement component 5                 | <b>0.0406</b>    | -0.1233           | 0.2302           | <b>-0.0336</b>    | 0.2194        | 183 ± 14   | 212 ± 19   | 240 ± 21   | 243 ± 38   |
| 48031_r_at  | C5orf4    | chromosome 5 open reading frame 4      | <b>0.0116</b>    | <b>-0.0182</b>    | <b>0.0422</b>    | -0.3703           | <b>0.0303</b> | 543 ± 35   | 755 ± 125  | 768 ± 54   | 975 ± 157  |
| 221766_s_at | C6orf37   | chromosome 6 open reading frame 37     | 0.0579           | <b>-0.0121</b>    | 0.1136           | <b>-0.0463</b>    | 0.1911        | 184 ± 31   | 240 ± 41   | 285 ± 32   | 304 ± 57   |
| 208469_s_at | C6orf8    | chromosome 6 open reading frame 8      | <b>0.0141</b>    | -0.2490           | 0.0712           | 0.4707            | 0.4058        | 138 ± 19   | 192 ± 46   | 190 ± 24   | 245 ± 74   |
| 204265_s_at | C6orf9    | chromosome 6 open reading frame 9      | <b>0.0431</b>    | <b>-0.0024</b>    | 0.0892           | <b>-0.0045</b>    | <b>0.0429</b> | 408 ± 44   | 471 ± 31   | 547 ± 41   | 622 ± 83   |
| 202992_at   | C7        | complement component 7                 | <b>0.0004</b>    | <b>-0.0114</b>    | 0.0940           | -0.0771           | 0.1185        | 65 ± 12    | 76 ± 15    | 117 ± 28   | 128 ± 28   |
| 212247_at   | C7orf14   | chromosome 7 open reading frame 14     | 0.0838           | <b>-0.0103</b>    | -0.3710          | -0.1692           | <b>0.0079</b> | 277 ± 18   | 330 ± 27   | 289 ± 13   | 388 ± 29   |
| 204024_at   | C8orf1    | chromosome 8 open reading frame 1      | <b>0.0076</b>    | <b>-0.0220</b>    | 0.1528           | -0.1242           | <b>0.0526</b> | 251 ± 15   | 259 ± 33   | 259 ± 26   | 347 ± 30   |

| Probe set   | Name    | Description                                            | NFT <sub>0</sub> | MMSE <sub>0</sub> | NFT <sub>1</sub> | MMSE <sub>1</sub> | ANOVA         | Control     | Incipient   | Moderate    | Severe      |
|-------------|---------|--------------------------------------------------------|------------------|-------------------|------------------|-------------------|---------------|-------------|-------------|-------------|-------------|
| 221543_s_at | C8orf2  | chromosome 8 open reading frame 2                      | 0.1488           | <b>-0.0194</b>    | <b>0.0309</b>    | -0.1725           | 0.2136        | 763 ± 76    | 839 ± 29    | 884 ± 30    | 938 ± 58    |
| 222166_at   | C9orf16 | chromosome 9 open reading frame 16                     | -0.8040          | <b>-0.0361</b>    | 0.3006           | 0.4738            | 0.1189        | 131 ± 9     | 112 ± 12    | 122 ± 9     | 163 ± 24    |
| 212848_s_at | C9orf3  | chromosome 9 open reading frame 3                      | <b>0.0365</b>    | <b>-0.0171</b>    | 0.3396           | 0.4588            | 0.1084        | 545 ± 55    | 648 ± 106   | 724 ± 73    | 819 ± 71    |
| 61874_at    | C9orf7  | chromosome 9 open reading frame 7                      | 0.1132           | <b>-0.0001</b>    | 0.0699           | -0.0607           | <b>0.0067</b> | 678 ± 33    | 815 ± 53    | 848 ± 36    | 1030 ± 106  |
| 205949_at   | CA1     | carbonic anhydrase I                                   | 0.1709           | <b>-0.0334</b>    | -0.4004          | -0.3545           | 0.1119        | 170 ± 23    | 165 ± 11    | 170 ± 19    | 239 ± 34    |
| 218168_s_at | CABC1   | chaperone, ABC1 activity of bc1 complex like           | <b>0.0030</b>    | -0.0629           | -0.2588          | -0.2545           | 0.1607        | 647 ± 36    | 722 ± 51    | 722 ± 51    | 836 ± 84    |
| 210770_s_at | CACNA1A | calcium channel, voltage-dependent, P/Q type, alpha 1A | <b>0.0296</b>    | -0.1755           | -0.3549          | <b>0.0190</b>     | 0.0739        | 842 ± 86    | 600 ± 108   | 824 ± 171   | 1334 ± 295  |
| 210380_s_at | CACNA1G | calcium channel, voltage-dependent, alpha 1G subunit   | <b>0.0359</b>    | -0.6883           | 0.3657           | -0.1288           | 0.9121        | 110 ± 16    | 110 ± 31    | 129 ± 18    | 118 ± 26    |
| 205525_at   | CALD1   | caldesmon 1                                            | 0.0677           | <b>-0.0174</b>    | 0.3032           | -0.2790           | 0.1691        | 245 ± 29    | 310 ± 40    | 336 ± 33    | 363 ± 55    |
| 214880_x_at | CALD1   | caldesmon 1                                            | 0.1284           | <b>-0.0197</b>    | <b>0.0449</b>    | <b>-0.0125</b>    | 0.1927        | 103 ± 8     | 146 ± 15    | 162 ± 10    | 160 ± 42    |
| 201616_s_at | CALD1   | caldesmon 1                                            | <b>0.0071</b>    | <b>-0.0215</b>    | -0.1260          | -0.1370           | 0.1422        | 152 ± 20    | 161 ± 8     | 224 ± 25    | 203 ± 36    |
| 213956_at   | CAP350  | centrosome-associated protein 350                      | 0.0676           | <b>-0.0213</b>    | 0.0893           | <b>-0.0111</b>    | <b>0.0257</b> | 326 ± 44    | 357 ± 29    | 624 ± 83    | 501 ± 116   |
| 204373_s_at | CAP350  | centrosome-associated protein 350                      | <b>0.0158</b>    | <b>-0.0069</b>    | 0.1450           | <b>-0.0194</b>    | 0.0557        | 548 ± 44    | 661 ± 46    | 722 ± 99    | 809 ± 56    |
| 210944_s_at | CAPN3   | calpain 3,                                             | <b>0.0344</b>    | -0.0585           | 0.4311           | -0.3479           | 0.2365        | 1953 ± 281  | 2232 ± 473  | 2295 ± 305  | 3153 ± 613  |
| 212707_s_at | CAPRI   | Ca2+-promoted Ras inactivator                          | <b>0.0063</b>    | -0.1193           | 0.0917           | -0.0768           | 0.2382        | 213 ± 17    | 286 ± 28    | 357 ± 64    | 341 ± 84    |
| 212512_s_at | CARM1   | coactivator-associated arginine methyltransferase-1    | <b>0.0025</b>    | -0.1770           | 0.2979           | <b>0.0375</b>     | 0.2178        | 825 ± 28    | 888 ± 121   | 966 ± 109   | 1186 ± 210  |
| 211208_s_at | CASK    | calcium/calmodulin-dependent serine protein kinase     | <b>0.0015</b>    | <b>-0.0229</b>    | 0.3791           | -0.4989           | 0.1543        | 625 ± 45    | 619 ± 53    | 711 ± 59    | 780 ± 62    |
| 61297_at    | CASKIN2 | cask-interacting protein 2                             | <b>0.0358</b>    | -0.1118           | 0.3470           | -0.1709           | <b>0.0343</b> | 185 ± 25    | 211 ± 9     | 296 ± 25    | 241 ± 38    |
| 202763_at   | CASP3   | caspase 3, apoptosis-related cysteine protease         | 0.4648           | <b>-0.0042</b>    | <b>-0.0319</b>   | 0.2221            | <b>0.0154</b> | 244 ± 13    | 214 ± 14    | 256 ± 21    | 335 ± 43    |
| 213596_at   | CASP4   | caspase 4, apoptosis-related cysteine protease         | <b>0.0155</b>    | <b>-0.0002</b>    | 0.1019           | -0.0769           | <b>0.0099</b> | 123 ± 9     | 146 ± 21    | 159 ± 14    | 206 ± 19    |
| 211464_x_at | CASP6   | caspase 6, apoptosis-related cysteine protease         | <b>0.0005</b>    | <b>-0.0328</b>    | 0.2753           | <b>-0.0058</b>    | 0.1579        | 104 ± 17    | 143 ± 17    | 189 ± 36    | 206 ± 58    |
| 210775_x_at | CASP9   | caspase 9, apoptosis-related cysteine protease         | <b>0.0351</b>    | <b>-0.0070</b>    | -0.1949          | -0.1976           | <b>0.0296</b> | 524 ± 29    | 542 ± 27    | 530 ± 26    | 649 ± 41    |
| 209701_at   | CAST    | calpastatin                                            | <b>0.0467</b>    | -0.1267           | 0.3898           | 0.3006            | 0.1231        | 173 ± 17    | 177 ± 20    | 162 ± 16    | 256 ± 53    |
| 212586_at   | CAST    | calpastatin                                            | 0.2290           | <b>-0.0017</b>    | 0.0618           | <b>-0.0001</b>    | <b>0.0236</b> | 947 ± 34    | 1222 ± 104  | 1143 ± 61   | 1316 ± 113  |
| 202370_s_at | CBFB    | core-binding factor, beta subunit                      | 0.1357           | <b>-0.0129</b>    | -0.1676          | 0.4665            | 0.2039        | 2103 ± 223  | 2117 ± 130  | 2462 ± 234  | 2647 ± 193  |
| 209682_at   | CBLB    | Cas-Br-M ecotropic retroviral transforming sequence b  | <b>0.0047</b>    | <b>-0.0019</b>    | -0.2344          | 0.4864            | <b>0.0211</b> | 271 ± 27    | 255 ± 13    | 308 ± 25    | 384 ± 43    |
| 206559_x_at | CCND1   | cyclin D1                                              | <b>0.0377</b>    | -0.1808           | -0.2346          | -0.4917           | 0.4216        | 8340 ± 1675 | 18791 ± 961 | 1418 ± 1318 | 0668 ± 1887 |
| 201700_at   | CCND3   | cyclin D3                                              | <b>0.0115</b>    | <b>-0.0099</b>    | 0.4261           | 0.4103            | <b>0.0202</b> | 1297 ± 62   | 1238 ± 81   | 1306 ± 110  | 1645 ± 106  |
| 208656_s_at | CCNI    | cyclin I                                               | 0.1799           | <b>-0.0493</b>    | -0.0681          | 0.4341            | 0.1501        | 5148 ± 233  | 5220 ± 474  | 5192 ± 262  | 6191 ± 455  |
| 220671_at   | CCRN4L  | CCR4 carbon catabolite repression 4-like               | 0.1917           | <b>-0.0279</b>    | 0.0808           | <b>-0.0514</b>    | 0.2738        | 317 ± 34    | 337 ± 33    | 388 ± 35    | 448 ± 84    |
| 215049_x_at | CD163   | CD163 antigen                                          | 0.6135           | <b>-0.0102</b>    | -0.0945          | -0.3960           | 0.1006        | 422 ± 84    | 361 ± 61    | 481 ± 81    | 689 ± 125   |
| 208405_s_at | CD164   | CD164 antigen, sialomucin                              | -0.9469          | <b>-0.0441</b>    | -0.2522          | -0.0675           | 0.6400        | 2494 ± 162  | 2415 ± 235  | 2474 ± 206  | 2795 ± 276  |
| 205789_at   | CD1D    | CD1D antigen, d polypeptide                            | 0.9905           | <b>-0.0477</b>    | 0.2226           | -0.3644           | 0.0753        | 52 ± 13     | 61 ± 8      | 41 ± 8      | 93 ± 21     |
| 207995_s_at | CD209L  | CD209 antigen-like                                     | 0.2358           | <b>-0.0036</b>    | <b>0.0504</b>    | -0.0713           | <b>0.0090</b> | 111 ± 9     | 130 ± 9     | 129 ± 14    | 193 ± 28    |
| 204581_at   | CD22    | CD22 antigen                                           | 0.1308           | <b>-0.0156</b>    | -0.2997          | -0.4034           | 0.0705        | 206 ± 46    | 223 ± 44    | 435 ± 90    | 370 ± 89    |
| 202256_at   | CD2BP2  | CD2 antigen binding protein 2                          | <b>0.0003</b>    | <b>-0.0044</b>    | -0.4117          | -0.4526           | <b>0.0071</b> | 365 ± 20    | 382 ± 34    | 411 ± 28    | 523 ± 43    |
| 204192_at   | CD37    | CD37 antigen                                           | <b>0.0393</b>    | <b>-0.0287</b>    | 0.2019           | -0.2060           | 0.1453        | 141 ± 21    | 185 ± 33    | 180 ± 30    | 234 ± 26    |
| 212014_x_at | CD44    | CD44 antigen                                           | 0.1574           | <b>-0.0011</b>    | -0.3565          | <b>-0.0400</b>    | <b>0.0245</b> | 202 ± 43    | 251 ± 20    | 345 ± 58    | 450 ± 76    |
| 212063_at   | CD44    | CD44 antigen                                           | 0.1240           | <b>-0.0039</b>    | -0.0830          | -0.2795           | 0.0774        | 1535 ± 362  | 1422 ± 297  | 2392 ± 556  | 2962 ± 529  |
| 209835_x_at | CD44    | CD44 antigen                                           | 0.1756           | <b>-0.0060</b>    | -0.4856          | -0.1959           | 0.0595        | 284 ± 54    | 360 ± 47    | 409 ± 58    | 525 ± 65    |
| 204489_s_at | CD44    | CD44 antigen                                           | 0.1072           | <b>-0.0252</b>    | -0.1584          | -0.0662           | 0.3795        | 550 ± 104   | 633 ± 139   | 877 ± 150   | 957 ± 313   |
| 204490_s_at | CD44    | CD44 antigen                                           | <b>0.0114</b>    | <b>-0.0021</b>    | 0.4591           | -0.2108           | <b>0.0287</b> | 190 ± 33    | 254 ± 19    | 327 ± 50    | 419 ± 81    |

| Probe set   | Name     | Description                                            | NFT <sub>0</sub> | MMSE <sub>0</sub> | NFT <sub>1</sub> | MMSE <sub>1</sub> | ANOVA         | Control    | Incipient  | Moderate    | Severe      |
|-------------|----------|--------------------------------------------------------|------------------|-------------------|------------------|-------------------|---------------|------------|------------|-------------|-------------|
| 205173_x_at | CD58     | CD58 antigen                                           | -0.6922          | <b>-0.0360</b>    | 0.4973           | <b>-0.0105</b>    | 0.6313        | 204 ± 23   | 219 ± 42   | 205 ± 38    | 270 ± 58    |
| 211189_x_at | CD84     | CD84 antigen                                           | 0.4477           | <b>-0.0468</b>    | 0.2165           | -0.1569           | 0.1496        | 203 ± 21   | 245 ± 34   | 228 ± 16    | 289 ± 34    |
| 205685_at   | CD86     | CD86 antigen                                           | 0.1727           | <b>-0.0199</b>    | 0.0656           | -0.1265           | 0.2488        | 135 ± 25   | 183 ± 33   | 174 ± 19    | 226 ± 46    |
| 205288_at   | CDC14A   | CDC14 cell division cycle 14 homolog A                 | 0.0944           | <b>-0.0002</b>    | <b>0.0000</b>    | <b>-0.0166</b>    | <b>0.0313</b> | 51 ± 5     | 68 ± 8     | 72 ± 8      | 99 ± 17     |
| 209658_at   | CDC16    | CDC16 cell division cycle 16 homolog                   | <b>0.0049</b>    | -0.0551           | <b>-0.0478</b>   | 0.3723            | 0.1444        | 1445 ± 138 | 1318 ± 118 | 1536 ± 90   | 2047 ± 400  |
| 209659_s_at | CDC16    | CDC16 cell division cycle 16 homolog                   | <b>0.0222</b>    | -0.0572           | 0.3535           | 0.3460            | 0.2377        | 1144 ± 85  | 1171 ± 111 | 1349 ± 92   | 1463 ± 197  |
| 201853_s_at | CDC25B   | cell division cycle 25B                                | <b>0.0444</b>    | -0.0807           | <b>-0.0429</b>   | -0.3220           | 0.5325        | 681 ± 75   | 687 ± 43   | 761 ± 57    | 795 ± 69    |
| 212401_s_at | CDC2L1   | cell division cycle 2-like 1                           | <b>0.0008</b>    | <b>-0.0044</b>    | -0.3227          | -0.3547           | <b>0.0464</b> | 841 ± 72   | 826 ± 55   | 979 ± 76    | 1162 ± 134  |
| 210473_s_at | CDC2L2   | cell division cycle 2-like 2                           | <b>0.0022</b>    | <b>-0.0040</b>    | 0.0912           | <b>-0.0263</b>    | 0.0661        | 718 ± 34   | 845 ± 83   | 1021 ± 146  | 1119 ± 136  |
| 207318_s_at | CDC2L5   | cell division cycle 2-like 5                           | <b>0.0117</b>    | -0.3694           | 0.3608           | 0.4445            | 0.5772        | 798 ± 58   | 877 ± 63   | 882 ± 67    | 940 ± 102   |
| 210965_x_at | CDC2L5   | cell division cycle 2-like 5                           | <b>0.0222</b>    | -0.0848           | -0.3203          | <b>0.0448</b>     | 0.0795        | 55 ± 12    | 42 ± 13    | 67 ± 11     | 90 ± 14     |
| 212540_at   | CDC34    | cell division cycle 34                                 | <b>0.0010</b>    | <b>-0.0076</b>    | 0.1914           | -0.4306           | <b>0.0154</b> | 661 ± 28   | 673 ± 53   | 792 ± 34    | 822 ± 33    |
| 218062_x_at | CDC42EP4 | CDC42 effector protein 4                               | 0.0635           | <b>-0.0030</b>    | 0.2132           | -0.1759           | <b>0.0433</b> | 1525 ± 178 | 1932 ± 169 | 2119 ± 155  | 2491 ± 380  |
| 214721_x_at | CDC42EP4 | CDC42 effector protein 4                               | <b>0.0425</b>    | <b>-0.0042</b>    | <b>0.0381</b>    | <b>-0.0265</b>    | 0.1068        | 845 ± 77   | 1065 ± 139 | 1164 ± 62   | 1311 ± 225  |
| 209057_x_at | CDC5L    | CDC5 cell division cycle 5-like                        | 0.3540           | <b>-0.0401</b>    | <b>0.0015</b>    | -0.0797           | 0.1905        | 325 ± 20   | 385 ± 31   | 375 ± 41    | 437 ± 43    |
| 203968_s_at | CDC6     | CDC6 cell division cycle 6 homolog                     | <b>0.0137</b>    | -0.2598           | -0.2975          | -0.2560           | 0.1934        | 95 ± 6     | 77 ± 14    | 112 ± 10    | 104 ± 15    |
| 206866_at   | CDH4     | cadherin 4, type 1, R-cadherin                         | <b>0.0222</b>    | <b>-0.0089</b>    | 0.2027           | 0.2995            | <b>0.0126</b> | 409 ± 43   | 350 ± 20   | 553 ± 36    | 563 ± 76    |
| 201253_s_at | CDIPT    | CDP-diacylglycerol--inositol 3-phosphatidyltransferase | <b>0.0092</b>    | -0.0557           | 0.1247           | 0.0875            | 0.0743        | 2104 ± 169 | 2319 ± 354 | 2368 ± 132  | 3127 ± 376  |
| 203468_at   | CDK10    | cyclin-dependent kinase 10                             | <b>0.0024</b>    | -0.1007           | -0.4625          | 0.1474            | 0.1340        | 219 ± 33   | 183 ± 32   | 282 ± 38    | 298 ± 43    |
| 204252_at   | CDK2     | cyclin-dependent kinase 2                              | 0.7921           | <b>-0.0196</b>    | -0.1799          | -0.3622           | 0.2063        | 325 ± 48   | 340 ± 31   | 349 ± 23    | 441 ± 49    |
| 201938_at   | CDK2AP1  | CDK2-associated protein 1                              | 0.4430           | <b>-0.0078</b>    | 0.3673           | <b>-0.0038</b>    | 0.2039        | 6126 ± 401 | 6628 ± 886 | 3130 ± 1006 | 8106 ± 951  |
| 213348_at   | CDKN1C   | cyclin-dependent kinase inhibitor 1C                   | 0.8162           | <b>-0.0347</b>    | -0.3622          | 0.1172            | 0.1428        | 3177 ± 375 | 2602 ± 246 | 3068 ± 430  | 4329 ± 776  |
| 204159_at   | CDKN2C   | cyclin-dependent kinase inhibitor 2C                   | <b>0.0401</b>    | <b>-0.0092</b>    | 0.2967           | -0.1842           | 0.1311        | 382 ± 44   | 488 ± 60   | 500 ± 54    | 600 ± 96    |
| 204039_at   | CEBPA    | CCAAT/enhancer binding protein , alpha                 | <b>0.0472</b>    | -0.1038           | <b>0.0184</b>    | 0.4440            | 0.1807        | 597 ± 48   | 774 ± 100  | 786 ± 93    | 830 ± 61    |
| 213006_at   | CEBPD    | CCAAT/enhancer binding protein , delta                 | <b>0.0539</b>    | <b>-0.0127</b>    | -0.3282          | 0.3574            | <b>0.0041</b> | 77 ± 6     | 76 ± 7     | 78 ± 13     | 126 ± 12    |
| 212437_at   | CENPB    | centromere protein B, 80kDa                            | <b>0.0025</b>    | -0.1993           | 0.0900           | -0.2449           | 0.2886        | 360 ± 40   | 459 ± 67   | 540 ± 52    | 520 ± 126   |
| 90265_at    | CENTA1   | centaurin, alpha 1                                     | <b>0.0446</b>    | -0.3566           | 0.2010           | 0.0866            | 0.3929        | 3918 ± 394 | 4256 ± 851 | 4261 ± 531  | 5753 ± 1312 |
| 212477_at   | CENTB2   | centaurin, beta 2                                      | 0.3075           | <b>-0.0126</b>    | -0.4842          | 0.3100            | <b>0.0529</b> | 75 ± 9     | 69 ± 8     | 87 ± 5      | 106 ± 13    |
| 214102_at   | CENTD1   | centaurin, delta 1                                     | <b>0.0056</b>    | <b>-0.0098</b>    | <b>0.0096</b>    | -0.1393           | <b>0.0116</b> | 395 ± 32   | 628 ± 62   | 696 ± 60    | 790 ± 141   |
| 213618_at   | CENTD1   | centaurin, delta 1                                     | <b>0.0369</b>    | <b>-0.0145</b>    | -0.3047          | -0.2844           | <b>0.0451</b> | 1503 ± 160 | 1624 ± 204 | 2190 ± 189  | 1992 ± 200  |
| 34206_at    | CENTD2   | centaurin, delta 2                                     | <b>0.0114</b>    | -0.0714           | -0.2073          | 0.4744            | 0.2501        | 506 ± 64   | 510 ± 62   | 642 ± 28    | 715 ± 148   |
| 219746_at   | CERD4    | cer-d4 homolog                                         | <b>0.0156</b>    | <b>-0.0006</b>    | <b>0.0173</b>    | 0.4469            | <b>0.0000</b> | 294 ± 13   | 424 ± 62   | 382 ± 25    | 599 ± 35    |
| 209508_x_at | CFLAR    | CASP8 and FADD-like apoptosis regulator                | 0.1552           | <b>-0.0064</b>    | 0.1718           | -0.1971           | <b>0.0483</b> | 258 ± 23   | 259 ± 14   | 321 ± 31    | 348 ± 29    |
| 211862_x_at | CFLAR    | CASP8 and FADD-like apoptosis regulator                | 0.0629           | <b>-0.0129</b>    | <b>0.0302</b>    | -0.0682           | 0.2689        | 270 ± 13   | 291 ± 33   | 329 ± 41    | 345 ± 18    |
| 214486_x_at | CFLAR    | CASP8 and FADD-like apoptosis regulator                | <b>0.0028</b>    | <b>-0.0002</b>    | 0.2733           | -0.1001           | <b>0.0019</b> | 226 ± 21   | 232 ± 21   | 318 ± 34    | 365 ± 22    |
| 211316_x_at | CFLAR    | CASP8 and FADD-like apoptosis regulator                | <b>0.0084</b>    | <b>-0.0195</b>    | -0.1291          | -0.1853           | 0.1004        | 667 ± 53   | 651 ± 35   | 768 ± 85    | 888 ± 85    |
| 48580_at    | CGBP     | CpG binding protein                                    | <b>0.0069</b>    | -0.1018           | -0.3274          | 0.4843            | 0.3010        | 1841 ± 118 | 1982 ± 213 | 2096 ± 136  | 2326 ± 263  |
| 206861_s_at | CGGBP1   | CGG triplet repeat binding protein 1                   | <b>0.0112</b>    | <b>-0.0006</b>    | 0.2764           | 0.4898            | <b>0.0007</b> | 747 ± 47   | 698 ± 64   | 792 ± 58    | 1250 ± 152  |
| 212405_s_at | CGI-01   | CGI-01 protein                                         | <b>0.0066</b>    | -0.1276           | 0.1575           | -0.1003           | 0.4228        | 294 ± 16   | 288 ± 35   | 337 ± 27    | 337 ± 28    |
| 212407_at   | CGI-01   | CGI-01 protein                                         | <b>0.0356</b>    | <b>-0.0269</b>    | 0.1279           | -0.0781           | <b>0.0212</b> | 417 ± 19   | 453 ± 35   | 422 ± 12    | 537 ± 43    |
| 202938_x_at | CGI-96   | CGI-96 protein                                         | <b>0.0377</b>    | -0.1320           | -0.1858          | -0.1763           | 0.2128        | 189 ± 10   | 150 ± 24   | 188 ± 30    | 251 ± 53    |
| 210672_s_at | CGTHBA   | Conserved gene telomeric to alpha globin cluster       | <b>0.0461</b>    | -0.3931           | 0.0799           | -0.4967           | 0.3067        | 640 ± 39   | 619 ± 53   | 587 ± 52    | 739 ± 84    |

| Probe set   | Name     | Description                                              | NFT <sub>0</sub> | MMSE <sub>0</sub> | NFT <sub>1</sub> | MMSE <sub>1</sub> | ANOVA         | Control    | Incipient  | Moderate   | Severe      |
|-------------|----------|----------------------------------------------------------|------------------|-------------------|------------------|-------------------|---------------|------------|------------|------------|-------------|
| 214273_x_at | CGTHBA   | Conserved gene telomeric to alpha globin cluster         | 0.0751           | <b>-0.0216</b>    | -0.3683          | 0.4655            | 0.1113        | 512 ± 53   | 499 ± 29   | 633 ± 42   | 749 ± 140   |
| 206932_at   | CH25H    | cholesterol 25-hydroxylase                               | 0.3227           | <b>-0.0402</b>    | 0.4733           | 0.2922            | 0.1271        | 214 ± 38   | 224 ± 20   | 211 ± 25   | 355 ± 82    |
| 204258_at   | CHD1     | chromodomain helicase DNA binding protein 1              | <b>0.0430</b>    | -0.0665           | -0.3121          | 0.4113            | 0.1449        | 327 ± 17   | 334 ± 18   | 395 ± 32   | 374 ± 22    |
| 203461_at   | CHD2     | chromodomain helicase DNA binding protein 2              | <b>0.0015</b>    | <b>-0.0001</b>    | 0.1545           | <b>-0.0180</b>    | <b>0.0000</b> | 143 ± 11   | 178 ± 33   | 184 ± 21   | 352 ± 35    |
| 205022_s_at | CHES1    | checkpoint suppressor 1                                  | <b>0.0476</b>    | <b>-0.0093</b>    | -0.1288          | -0.2885           | 0.1187        | 298 ± 34   | 265 ± 37   | 363 ± 44   | 400 ± 48    |
| 218803_at   | CHFR     | checkpoint with forkhead and ring finger domains         | <b>0.0342</b>    | <b>-0.0315</b>    | 0.1311           | <b>0.0361</b>     | 0.0612        | 717 ± 33   | 782 ± 80   | 890 ± 35   | 1000 ± 125  |
| 220210_at   | CHRNA10  | cholinergic receptor, nicotinic, alpha polypeptide 10    | 0.4964           | <b>-0.0465</b>    | 0.1777           | -0.0845           | 0.3789        | 93 ± 13    | 97 ± 15    | 115 ± 10   | 122 ± 14    |
| 207568_at   | CHRNA6   | cholinergic receptor, nicotinic, alpha polypeptide 6     | 0.1486           | <b>-0.0233</b>    | 0.4311           | 0.4926            | 0.1019        | 229 ± 31   | 234 ± 30   | 234 ± 20   | 341 ± 55    |
| 210943_s_at | CHS1     | Chediak-Higashi syndrome 1                               | 0.5176           | <b>-0.0465</b>    | 0.1558           | -0.1652           | 0.1034        | 498 ± 37   | 480 ± 34   | 496 ± 41   | 645 ± 77    |
| 209834_at   | CHST3    | carbohydrate sulfotransferase 3                          | 0.1458           | <b>-0.0035</b>    | -0.2076          | -0.2966           | 0.1017        | 555 ± 103  | 579 ± 59   | 625 ± 62   | 853 ± 104   |
| 32094_at    | CHST3    | carbohydrate sulfotransferase 3                          | <b>0.0096</b>    | <b>-0.0003</b>    | -0.1875          | -0.3537           | <b>0.0133</b> | 485 ± 69   | 513 ± 38   | 713 ± 91   | 815 ± 91    |
| 221059_s_at | CHST6    | carbohydrate sulfotransferase 6                          | <b>0.0221</b>    | <b>-0.0014</b>    | <b>0.0043</b>    | -0.4750           | <b>0.0085</b> | 650 ± 50   | 658 ± 70   | 926 ± 115  | 1061 ± 113  |
| 201953_at   | CIB1     | calcium and integrin binding 1                           | 0.0627           | <b>-0.0202</b>    | 0.3059           | 0.3883            | <b>0.0068</b> | 721 ± 40   | 757 ± 48   | 705 ± 38   | 942 ± 57    |
| 205516_x_at | CIZ1     | Cip1-interacting zinc finger protein                     | <b>0.0077</b>    | -0.3116           | -0.0616          | -0.4456           | 0.1239        | 969 ± 85   | 911 ± 42   | 1224 ± 87  | 1043 ± 142  |
| 200999_s_at | CKAP4    | cytoskeleton-associated protein 4                        | <b>0.0394</b>    | -0.2797           | -0.3599          | -0.4826           | 0.3189        | 539 ± 46   | 523 ± 42   | 643 ± 44   | 604 ± 69    |
| 217947_at   | CKLFSF6  | chemokine-like factor super family 6                     | 0.0564           | <b>-0.0011</b>    | 0.2061           | -0.1641           | <b>0.0481</b> | 644 ± 45   | 750 ± 54   | 836 ± 85   | 944 ± 96    |
| 214135_at   | CLDN18   | claudin 18                                               | <b>0.0325</b>    | -0.1671           | <b>0.0338</b>    | 0.4801            | 0.0680        | 123 ± 15   | 187 ± 22   | 172 ± 17   | 192 ± 27    |
| 204482_at   | CLDN5    | claudin 5                                                | <b>0.0230</b>    | -0.0576           | <b>0.0011</b>    | -0.3048           | <b>0.0121</b> | 684 ± 76   | 1053 ± 123 | 1262 ± 153 | 1111 ± 109  |
| 221698_s_at | CLECSF12 | C-type lectin, superfamily member 12                     | 0.0650           | <b>-0.0036</b>    | <b>0.0522</b>    | -0.4612           | <b>0.0332</b> | 225 ± 22   | 314 ± 44   | 326 ± 39   | 415 ± 66    |
| 209732_at   | CLECSF2  | C-type lectin, superfamily member 2                      | <b>0.0140</b>    | -0.2275           | -0.4506          | 0.4686            | 0.5504        | 166 ± 39   | 204 ± 32   | 200 ± 35   | 250 ± 57    |
| 208659_at   | CLIC1    | chloride intracellular channel 1                         | 0.8258           | <b>-0.0403</b>    | -0.2440          | <b>-0.0457</b>    | 0.4004        | 486 ± 71   | 534 ± 50   | 627 ± 22   | 614 ± 94    |
| 222043_at   | CLU      | clusterin                                                | <b>0.0230</b>    | <b>-0.0176</b>    | <b>0.0040</b>    | <b>0.0373</b>     | <b>0.0226</b> | 1111 ± 60  | 982 ± 60   | 1716 ± 273 | 1584 ± 207  |
| 61732_r_at  | CMG1     | capillary morphogenesis protein 1                        | <b>0.0002</b>    | <b>-0.0158</b>    | <b>0.0069</b>    | <b>-0.0166</b>    | <b>0.0255</b> | 21 ± 4     | 31 ± 4     | 35 ± 5     | 62 ± 18     |
| 201774_s_at | CNAP1    | chromosome condensation-related SMC-associated protein 1 | 0.1620           | <b>-0.0075</b>    | 0.3686           | <b>-0.0276</b>    | 0.2398        | 147 ± 18   | 152 ± 31   | 179 ± 13   | 202 ± 10    |
| 222182_s_at | CNOT2    | CCR4-NOT transcription complex, subunit 2                | <b>0.0001</b>    | <b>-0.0047</b>    | -0.2017          | 0.3898            | <b>0.0108</b> | 738 ± 65   | 662 ± 50   | 1115 ± 104 | 1163 ± 201  |
| 208912_s_at | CNP      | 2',3'-cyclic nucleotide 3' phosphodiesterase             | 0.0801           | <b>-0.0264</b>    | 0.1639           | -0.4091           | 0.1319        | 4700 ± 260 | 5089 ± 574 | 6190 ± 593 | 7447 ± 1606 |
| 203073_at   | COG2     | component of oligomeric golgi complex 2                  | 0.3151           | <b>-0.0400</b>    | -0.4490          | -0.4517           | 0.1009        | 703 ± 33   | 780 ± 66   | 776 ± 54   | 883 ± 44    |
| 212189_s_at | COG4     | component of oligomeric golgi complex 4                  | <b>0.0119</b>    | -0.1525           | <b>0.0294</b>    | -0.4694           | 0.2053        | 335 ± 46   | 423 ± 42   | 448 ± 31   | 486 ± 82    |
| 209082_s_at | COL18A1  | collagen, type XVIII, alpha 1                            | <b>0.0048</b>    | <b>-0.0359</b>    | 0.1687           | -0.1700           | 0.1127        | 219 ± 22   | 265 ± 32   | 286 ± 18   | 332 ± 52    |
| 202403_s_at | COL1A2   | collagen, type I, alpha 2                                | <b>0.0342</b>    | <b>-0.0031</b>    | -0.1468          | -0.4837           | <b>0.0165</b> | 191 ± 20   | 200 ± 30   | 197 ± 9    | 294 ± 32    |
| 208096_s_at | COL21A1  | collagen, type XXI, alpha 1                              | 0.1289           | <b>-0.0035</b>    | -0.1983          | -0.1062           | <b>0.0334</b> | 330 ± 40   | 348 ± 59   | 414 ± 77   | 601 ± 87    |
| 222073_at   | COL4A3   | collagen, type IV, alpha 3                               | <b>0.0521</b>    | <b>-0.0010</b>    | -0.4617          | -0.4398           | <b>0.0059</b> | 121 ± 16   | 126 ± 10   | 161 ± 20   | 232 ± 36    |
| 213110_s_at | COL4A5   | collagen, type IV, alpha 5                               | 0.3377           | <b>-0.0133</b>    | 0.3257           | -0.2960           | 0.1181        | 1168 ± 129 | 1592 ± 264 | 1661 ± 169 | 1862 ± 273  |
| 209156_s_at | COL6A2   | collagen, type VI, alpha 2                               | 0.0823           | <b>-0.0015</b>    | -0.2691          | -0.4149           | <b>0.0233</b> | 136 ± 24   | 134 ± 10   | 157 ± 28   | 331 ± 92    |
| 201438_at   | COL6A3   | collagen, type VI, alpha 3                               | 0.2859           | <b>-0.0267</b>    | 0.2059           | 0.4789            | 0.1675        | 67 ± 12    | 96 ± 32    | 153 ± 47   | 172 ± 43    |
| 204136_at   | COL7A1   | collagen, type VII, alpha 1                              | <b>0.0279</b>    | -0.1322           | 0.1597           | 0.2291            | 0.2043        | 197 ± 14   | 241 ± 73   | 313 ± 26   | 310 ± 60    |
| 52651_at    | COL8A2   | collagen, type VIII, alpha 2                             | <b>0.0147</b>    | <b>-0.0006</b>    | <b>0.0083</b>    | <b>-0.0204</b>    | <b>0.0028</b> | 216 ± 20   | 311 ± 28   | 317 ± 24   | 355 ± 24    |
| 208817_at   | COMT     | catechol-O-methyltransferase                             | 0.2906           | <b>-0.0093</b>    | -0.0950          | 0.4285            | 0.0734        | 644 ± 57   | 575 ± 42   | 658 ± 48   | 853 ± 119   |
| 201358_s_at | COPB     | coatamer protein complex, subunit beta                   | 0.2386           | <b>-0.0283</b>    | 0.0666           | -0.1164           | 0.1351        | 3174 ± 113 | 3629 ± 299 | 3601 ± 165 | 3994 ± 337  |
| 209746_s_at | COQ7     | COQ7 coenzyme Q, 7 homolog ubiquinone                    | <b>0.0231</b>    | -0.1475           | 0.1429           | 0.2421            | 0.0726        | 319 ± 19   | 358 ± 33   | 307 ± 27   | 424 ± 47    |
| 214282_at   | CP       | ceruloplasmin                                            | 0.2097           | <b>-0.0147</b>    | -0.4169          | 0.3578            | 0.1093        | 38 ± 5     | 39 ± 9     | 58 ± 9     | 69 ± 15     |
| 206100_at   | CPM      | carboxypeptidase M                                       | 0.1786           | <b>-0.0370</b>    | 0.2926           | <b>-0.0122</b>    | 0.1208        | 196 ± 25   | 301 ± 49   | 301 ± 53   | 346 ± 44    |



| Probe set   | Name    | Description                                            | NFT <sub>0</sub> | MMSE <sub>0</sub> | NFT <sub>1</sub> | MMSE <sub>1</sub> | ANOVA         | Control    | Incipient  | Moderate   | Severe     |
|-------------|---------|--------------------------------------------------------|------------------|-------------------|------------------|-------------------|---------------|------------|------------|------------|------------|
| 202118_s_at | CPNE3   | copine III                                             | <b>0.0249</b>    | <b>-0.0163</b>    | 0.2366           | <b>-0.0141</b>    | <b>0.0019</b> | 258 ± 28   | 317 ± 36   | 424 ± 17   | 345 ± 23   |
| 201639_s_at | CPSF1   | cleavage and polyadenylation specific factor 1, 160kDa | <b>0.0052</b>    | -0.1161           | 0.4582           | -0.0721           | 0.3101        | 385 ± 38   | 502 ± 91   | 497 ± 71   | 601 ± 121  |
| 33132_at    | CPSF1   | cleavage and polyadenylation specific factor 1, 160kDa | <b>0.0495</b>    | -0.1760           | <b>0.0362</b>    | <b>-0.0518</b>    | 0.0953        | 483 ± 39   | 707 ± 77   | 759 ± 73   | 713 ± 129  |
| 210069_at   | CPT1B   | carnitine palmitoyltransferase I, muscle               | <b>0.0011</b>    | <b>-0.0028</b>    | -0.1709          | -0.3727           | <b>0.0181</b> | 227 ± 24   | 200 ± 25   | 301 ± 40   | 383 ± 65   |
| 210070_s_at | CPT1B   | carnitine palmitoyltransferase I, muscle               | <b>0.0136</b>    | <b>-0.0098</b>    | 0.4551           | -0.2809           | 0.0811        | 263 ± 26   | 311 ± 33   | 344 ± 24   | 388 ± 49   |
| 204264_at   | CPT2    | carnitine palmitoyltransferase II                      | 0.1620           | <b>-0.0001</b>    | <b>0.0063</b>    | <b>-0.0319</b>    | <b>0.0017</b> | 104 ± 6    | 133 ± 12   | 132 ± 13   | 177 ± 14   |
| 217552_x_at | CR1     | complement component receptor 1                        | 0.1135           | <b>-0.0040</b>    | 0.3839           | <b>-0.0237</b>    | 0.0830        | 19 ± 7     | 35 ± 11    | 43 ± 13    | 63 ± 14    |
| 217484_at   | CR1     | complement component receptor 1                        | <b>0.0466</b>    | <b>-0.0450</b>    | <b>0.0420</b>    | -0.3210           | <b>0.0206</b> | 131 ± 11   | 187 ± 23   | 165 ± 10   | 213 ± 27   |
| 205076_s_at | CRA     | cisplatin resistance associated                        | 0.0631           | <b>-0.0038</b>    | 0.4665           | -0.3701           | 0.0619        | 406 ± 40   | 398 ± 33   | 465 ± 36   | 573 ± 71   |
| 209833_at   | CRADD   | CASP2 and RIPK1 domain                                 | 0.0606           | <b>-0.0268</b>    | -0.3374          | -0.4958           | 0.0583        | 392 ± 14   | 371 ± 19   | 384 ± 14   | 452 ± 33   |
| 209432_s_at | CREB3   | cAMP responsive element binding protein 3              | <b>0.0006</b>    | <b>-0.0104</b>    | -0.1206          | 0.3873            | <b>0.0014</b> | 708 ± 32   | 678 ± 31   | 922 ± 49   | 831 ± 53   |
| 202160_at   | CREBBP  | CREB binding protein                                   | <b>0.0020</b>    | <b>-0.0115</b>    | 0.1311           | -0.1158           | <b>0.0122</b> | 1011 ± 56  | 1138 ± 97  | 1388 ± 96  | 1278 ± 76  |
| 205984_at   | CRHBP   | corticotropin releasing hormone binding protein        | <b>0.0076</b>    | <b>-0.0334</b>    | -0.3448          | 0.4704            | 0.2320        | 122 ± 17   | 128 ± 17   | 155 ± 26   | 187 ± 34   |
| 219226_at   | CRK7    | CDC2-related protein kinase 7                          | -0.8701          | <b>-0.0116</b>    | 0.4451           | -0.4041           | <b>0.0483</b> | 126 ± 18   | 106 ± 9    | 107 ± 10   | 183 ± 32   |
| 206184_at   | CRKL    | v-crk sarcoma virus CT10 oncogene homolog -like        | 0.2573           | <b>-0.0417</b>    | -0.4839          | -0.1358           | 0.0794        | 228 ± 19   | 260 ± 20   | 237 ± 21   | 312 ± 32   |
| 206315_at   | CRLF1   | cytokine receptor-like factor 1                        | 0.1669           | <b>-0.0156</b>    | 0.2908           | -0.4871           | 0.1171        | 136 ± 41   | 92 ± 32    | 240 ± 72   | 270 ± 59   |
| 209716_at   | CSF1    | colony stimulating factor 1                            | 0.2485           | <b>-0.0008</b>    | 0.1086           | <b>-0.0167</b>    | <b>0.0039</b> | 367 ± 39   | 506 ± 50   | 500 ± 44   | 722 ± 98   |
| 202329_at   | CSK     | c-src tyrosine kinase                                  | <b>0.0014</b>    | <b>-0.0100</b>    | 0.0856           | -0.0762           | <b>0.0362</b> | 526 ± 46   | 614 ± 38   | 799 ± 62   | 850 ± 148  |
| 208865_at   | CSNK1A1 | casein kinase 1, alpha 1                               | 0.3689           | <b>0.0000</b>     | -0.1906          | -0.1298           | <b>0.0125</b> | 2970 ± 138 | 2918 ± 50  | 3518 ± 81  | 3846 ± 407 |
| 208866_at   | CSNK1A1 | casein kinase 1, alpha 1                               | 0.1292           | <b>-0.0081</b>    | -0.3952          | -0.1598           | <b>0.0060</b> | 324 ± 22   | 323 ± 10   | 426 ± 24   | 384 ± 24   |
| 202332_at   | CSNK1E  | casein kinase 1, epsilon                               | <b>0.0057</b>    | <b>-0.0027</b>    | 0.3337           | 0.0660            | <b>0.0054</b> | 570 ± 58   | 503 ± 33   | 746 ± 83   | 1068 ± 183 |
| 203575_at   | CSNK2A2 | casein kinase 2, alpha prime polypeptide               | <b>0.0004</b>    | <b>-0.0530</b>    | <b>0.0046</b>    | -0.1334           | 0.0685        | 370 ± 8    | 389 ± 13   | 459 ± 37   | 437 ± 31   |
| 221731_x_at | CSPG2   | chondroitin sulfate proteoglycan 2                     | <b>0.0516</b>    | <b>-0.0024</b>    | -0.4981          | -0.1574           | <b>0.0258</b> | 2094 ± 293 | 2434 ± 296 | 3450 ± 377 | 3298 ± 448 |
| 204620_s_at | CSPG2   | chondroitin sulfate proteoglycan 2                     | 0.4794           | <b>-0.0147</b>    | -0.1054          | -0.2114           | 0.2851        | 1776 ± 245 | 1626 ± 168 | 2017 ± 218 | 2228 ± 227 |
| 204619_s_at | CSPG2   | chondroitin sulfate proteoglycan 2                     | 0.1038           | <b>-0.0247</b>    | 0.0746           | <b>-0.0042</b>    | 0.1689        | 389 ± 31   | 519 ± 63   | 575 ± 85   | 558 ± 63   |
| 211126_s_at | CSRP2   | cysteine and glycine-rich protein 2                    | 0.0726           | <b>-0.0047</b>    | -0.2915          | -0.2565           | <b>0.0218</b> | 443 ± 41   | 444 ± 69   | 432 ± 32   | 657 ± 74   |
| 207030_s_at | CSRP2   | cysteine and glycine-rich protein 2                    | <b>0.0026</b>    | <b>-0.0037</b>    | -0.1732          | -0.2394           | <b>0.0369</b> | 391 ± 42   | 381 ± 78   | 446 ± 45   | 660 ± 112  |
| 205670_at   | CST     | cerebroside sulfotransferase                           | <b>0.0216</b>    | -0.0799           | 0.0935           | -0.1898           | 0.1771        | 85 ± 27    | 145 ± 60   | 105 ± 23   | 240 ± 86   |
| 220957_at   | CTAGE-1 | CTAGE-1 protein                                        | 0.3922           | <b>-0.0278</b>    | 0.3270           | 0.2087            | 0.0796        | 126 ± 14   | 136 ± 25   | 129 ± 13   | 207 ± 40   |
| 213980_s_at | CTBP1   | C-terminal binding protein 1                           | <b>0.0411</b>    | -0.3020           | -0.3468          | -0.4501           | <b>0.0442</b> | 2235 ± 150 | 1972 ± 57  | 2554 ± 137 | 2284 ± 115 |
| 201220_x_at | CTBP2   | C-terminal binding protein 2                           | <b>0.0064</b>    | <b>-0.0149</b>    | 0.1692           | -0.3864           | 0.0726        | 1894 ± 191 | 1724 ± 93  | 2254 ± 271 | 2556 ± 243 |
| 210835_s_at | CTBP2   | C-terminal binding protein 2                           | <b>0.0001</b>    | <b>-0.0270</b>    | 0.2167           | 0.2175            | <b>0.0381</b> | 2070 ± 200 | 2304 ± 324 | 2897 ± 281 | 3192 ± 374 |
| 218923_at   | CTBS    | chitinase, di-N-acetyl-                                | <b>0.0262</b>    | <b>-0.0332</b>    | 0.1312           | -0.0678           | 0.0832        | 207 ± 22   | 264 ± 22   | 333 ± 56   | 315 ± 38   |
| 210844_x_at | CTNNA1  | catenin, alpha 1 (102kDa)                              | 0.4535           | <b>-0.0044</b>    | -0.1227          | -0.1602           | 0.1983        | 1553 ± 152 | 1572 ± 212 | 1888 ± 193 | 2026 ± 167 |
| 221021_s_at | CTNBL1  | catenin, beta like 1                                   | 0.2123           | <b>-0.0093</b>    | 0.1529           | -0.1693           | <b>0.0256</b> | 283 ± 24   | 353 ± 25   | 359 ± 12   | 392 ± 34   |
| 36566_at    | CTNS    | cystinosis, nephropathic                               | <b>0.0432</b>    | <b>-0.0324</b>    | 0.1469           | -0.3789           | 0.0759        | 284 ± 35   | 323 ± 40   | 334 ± 13   | 422 ± 51   |
| 219080_s_at | CTPS2   | CTP synthase II                                        | 0.1321           | <b>-0.0001</b>    | <b>0.0362</b>    | -0.2678           | <b>0.0003</b> | 93 ± 11    | 112 ± 11   | 109 ± 13   | 196 ± 24   |
| 206297_at   | CTRC    | chymotrypsin C                                         | 0.3537           | <b>-0.0247</b>    | <b>0.0352</b>    | -0.4192           | <b>0.0299</b> | 162 ± 22   | 195 ± 30   | 181 ± 29   | 293 ± 43   |
| 214377_s_at | CTRL    | chymotrypsin-like                                      | <b>0.0061</b>    | -0.1180           | -0.1313          | 0.4411            | 0.2503        | 208 ± 24   | 220 ± 28   | 226 ± 15   | 285 ± 42   |
| 213141_at   | CTRL    | chymotrypsin-like                                      | 0.0569           | <b>-0.0238</b>    | -0.1651          | -0.3981           | 0.1252        | 328 ± 33   | 307 ± 17   | 348 ± 18   | 471 ± 92   |
| 213275_x_at | CTSB    | cathepsin B                                            | <b>0.0307</b>    | <b>-0.0190</b>    | 0.2080           | -0.3207           | 0.0729        | 3611 ± 346 | 3316 ± 265 | 3940 ± 318 | 5016 ± 695 |
| 202295_s_at | CTSH    | cathepsin H                                            | 0.1658           | <b>-0.0362</b>    | -0.4007          | -0.0755           | 0.3380        | 1821 ± 234 | 1787 ± 351 | 2375 ± 324 | 2354 ± 294 |

| Probe set   | Name     | Description                                         | NFT <sub>0</sub> | MMSE <sub>0</sub> | NFT <sub>1</sub> | MMSE <sub>1</sub> | ANOVA         | Control    | Incipient  | Moderate   | Severe     |
|-------------|----------|-----------------------------------------------------|------------------|-------------------|------------------|-------------------|---------------|------------|------------|------------|------------|
| 202087_s_at | CTSL     | cathepsin L                                         | 0.5555           | <b>-0.0272</b>    | -0.4994          | <b>-0.0402</b>    | 0.6177        | 647 ± 40   | 679 ± 62   | 733 ± 60   | 743 ± 80   |
| 202902_s_at | CTSS     | cathepsin S                                         | <b>0.0368</b>    | -0.4058           | 0.2206           | -0.3935           | 0.2152        | 166 ± 18   | 236 ± 23   | 173 ± 22   | 238 ± 51   |
| 202901_x_at | CTSS     | cathepsin S                                         | 0.4358           | <b>-0.0489</b>    | <b>0.0065</b>    | -0.0708           | 0.1185        | 95 ± 8     | 144 ± 18   | 134 ± 18   | 149 ± 22   |
| 201424_s_at | CUL4A    | cullin 4A                                           | <b>0.0516</b>    | <b>-0.0168</b>    | 0.2723           | <b>-0.0061</b>    | <b>0.0353</b> | 336 ± 21   | 386 ± 43   | 483 ± 46   | 441 ± 28   |
| 203533_s_at | CUL5     | cullin 5                                            | 0.1935           | <b>-0.0367</b>    | -0.1648          | -0.0905           | <b>0.0401</b> | 225 ± 19   | 188 ± 27   | 266 ± 13   | 254 ± 16   |
| 214743_at   | CUTL1    | cut-like 1, CCAAT displacement protein              | <b>0.0013</b>    | <b>-0.0014</b>    | 0.2620           | 0.0981            | <b>0.0042</b> | 801 ± 35   | 714 ± 86   | 943 ± 81   | 1255 ± 154 |
| 209774_x_at | CXCL2    | chemokine ligand 2                                  | 0.1268           | <b>-0.0015</b>    | -0.3813          | -0.3027           | <b>0.0389</b> | 120 ± 15   | 146 ± 21   | 199 ± 31   | 209 ± 24   |
| 213681_at   | CYHR1    | cysteine and histidine rich 1                       | <b>0.0110</b>    | <b>-0.0373</b>    | -0.1514          | -0.0675           | 0.1174        | 204 ± 22   | 220 ± 18   | 207 ± 17   | 285 ± 39   |
| 216809_at   | CYLC1    | cylicin, basic protein of sperm head cytoskeleton 1 | <b>0.0074</b>    | <b>0.0000</b>     | 0.1655           | -0.1105           | <b>0.0001</b> | 106 ± 11   | 128 ± 15   | 151 ± 10   | 239 ± 29   |
| 211031_s_at | CYLN2    | cytoplasmic linker 2                                | <b>0.0373</b>    | -0.1178           | -0.3140          | -0.1301           | <b>0.0252</b> | 1267 ± 154 | 1318 ± 90  | 1908 ± 142 | 1380 ± 229 |
| 204309_at   | CYP11A   | cytochrome P450, subfamily XIA                      | 0.1618           | <b>-0.0057</b>    | 0.2687           | <b>-0.0285</b>    | <b>0.0499</b> | 119 ± 12   | 143 ± 6    | 150 ± 6    | 175 ± 23   |
| 217558_at   | CYP2C9   | cytochrome P450, subfamily IIC , polypeptide 9      | 0.0985           | <b>-0.0008</b>    | 0.1531           | -0.4189           | <b>0.0084</b> | 78 ± 11    | 76 ± 5     | 93 ± 13    | 144 ± 21   |
| 220432_s_at | CYP39A1  | cytochrome P450, subfamily XXXIX , polypeptide 1    | 0.0859           | <b>-0.0161</b>    | <b>0.0101</b>    | -0.1890           | 0.1692        | 31 ± 5     | 40 ± 9     | 45 ± 5     | 57 ± 12    |
| 205998_x_at | CYP3A4   | cytochrome P450, subfamily IIIA , polypeptide 4     | 0.0692           | <b>-0.0135</b>    | 0.2344           | -0.3041           | <b>0.0389</b> | 606 ± 28   | 722 ± 91   | 711 ± 44   | 868 ± 68   |
| 206515_at   | CYP4F3   | cytochrome P450, subfamily IVF, polypeptide 3       | 0.0923           | <b>-0.0010</b>    | <b>0.0075</b>    | -0.3227           | <b>0.0230</b> | 124 ± 17   | 143 ± 30   | 229 ± 52   | 367 ± 94   |
| 204190_at   | D13S106E | highly charged protein                              | <b>0.0156</b>    | -0.2346           | -0.1781          | 0.2969            | 0.2799        | 551 ± 44   | 567 ± 45   | 522 ± 43   | 688 ± 105  |
| 202646_s_at | D1S155E  | NRAS-related gene                                   | <b>0.0484</b>    | -0.1550           | <b>0.0010</b>    | -0.1643           | 0.3444        | 2687 ± 151 | 2897 ± 196 | 3029 ± 101 | 2993 ± 141 |
| 216060_s_at | DAAM1    | dishevelled associated activator of morphogenesis 1 | <b>0.0015</b>    | -0.1112           | 0.2206           | 0.2471            | 0.0891        | 839 ± 26   | 824 ± 50   | 1042 ± 111 | 964 ± 15   |
| 212793_at   | DAAM2    | dishevelled associated activator of morphogenesis 2 | <b>0.0038</b>    | <b>-0.0114</b>    | 0.1578           | -0.0982           | 0.0608        | 3452 ± 394 | 4531 ± 634 | 5302 ± 359 | 5565 ± 939 |
| 205417_s_at | DAG1     | dystroglycan 1                                      | 0.1294           | <b>-0.0107</b>    | 0.2535           | -0.4654           | 0.0928        | 1326 ± 94  | 1328 ± 86  | 1592 ± 102 | 1639 ± 148 |
| 206878_at   | DAO      | D-amino-acid oxidase                                | 0.2293           | <b>-0.0445</b>    | <b>0.0137</b>    | -0.3370           | 0.0682        | 270 ± 15   | 335 ± 60   | 321 ± 32   | 432 ± 50   |
| 206324_s_at | DAPK2    | death-associated protein kinase 2                   | <b>0.0267</b>    | <b>-0.0082</b>    | 0.0843           | <b>-0.0030</b>    | <b>0.0044</b> | 122 ± 15   | 174 ± 16   | 141 ± 7    | 267 ± 50   |
| 203891_s_at | DAPK3    | death-associated protein kinase 3                   | <b>0.0397</b>    | <b>-0.0080</b>    | 0.0604           | -0.4720           | <b>0.0043</b> | 100 ± 10   | 139 ± 21   | 134 ± 9    | 214 ± 33   |
| 201623_s_at | DARS     | aspartyl-tRNA synthetase                            | 0.6838           | <b>-0.0082</b>    | <b>0.0183</b>    | -0.0978           | 0.1298        | 1240 ± 48  | 1426 ± 57  | 1476 ± 115 | 1625 ± 181 |
| 208281_x_at | DAZ3     | deleted in azoospermia 3                            | 0.5587           | <b>-0.0330</b>    | 0.3063           | -0.2133           | 0.1894        | 111 ± 13   | 126 ± 13   | 129 ± 15   | 160 ± 16   |
| 218443_s_at | DAZAP1   | DAZ associated protein 1                            | <b>0.0020</b>    | <b>-0.0492</b>    | 0.1234           | 0.3117            | 0.1403        | 439 ± 32   | 505 ± 53   | 523 ± 35   | 598 ± 70   |
| 214334_x_at | DAZAP2   | DAZ associated protein 2                            | 0.4612           | <b>-0.0221</b>    | -0.4577          | -0.4672           | 0.1398        | 4825 ± 241 | 5432 ± 532 | 5819 ± 442 | 6184 ± 491 |
| 201678_s_at | DC12     | DC12 protein                                        | 0.0959           | <b>-0.0222</b>    | -0.1699          | -0.4385           | <b>0.0528</b> | 541 ± 49   | 490 ± 40   | 533 ± 40   | 674 ± 45   |
| 209759_s_at | DCI      | dodecenoyl-Coenzyme A delta isomerase               | 0.0751           | <b>-0.0024</b>    | 0.2597           | -0.4718           | <b>0.0158</b> | 303 ± 27   | 310 ± 50   | 338 ± 23   | 491 ± 66   |
| 219678_x_at | DCLRE1C  | DNA cross-link repair 1C                            | <b>0.0015</b>    | <b>-0.0240</b>    | 0.3760           | -0.4335           | 0.1549        | 658 ± 71   | 694 ± 84   | 955 ± 161  | 993 ± 171  |
| 209335_at   | DCN      | decorin                                             | 0.6224           | <b>-0.0495</b>    | 0.4554           | <b>-0.0316</b>    | 0.3997        | 246 ± 17   | 292 ± 13   | 282 ± 28   | 317 ± 47   |
| 210749_x_at | DDR1     | discoidin domain receptor family, member 1          | <b>0.0327</b>    | -0.0610           | 0.3706           | -0.2586           | 0.1939        | 2892 ± 340 | 3354 ± 267 | 3910 ± 344 | 3776 ± 498 |
| 208779_x_at | DDR1     | discoidin domain receptor family, member 1          | <b>0.0030</b>    | <b>-0.0014</b>    | 0.2272           | -0.1356           | <b>0.0103</b> | 2859 ± 317 | 3596 ± 440 | 4527 ± 383 | 4669 ± 516 |
| 207169_x_at | DDR1     | discoidin domain receptor family, member 1          | <b>0.0026</b>    | <b>-0.0048</b>    | 0.2248           | -0.3244           | <b>0.0137</b> | 2385 ± 270 | 3067 ± 372 | 3934 ± 363 | 3896 ± 494 |
| 205168_at   | DDR2     | discoidin domain receptor family, member 2          | <b>0.0177</b>    | <b>-0.0001</b>    | 0.0891           | -0.1388           | <b>0.0017</b> | 295 ± 53   | 323 ± 32   | 471 ± 51   | 773 ± 146  |
| 208895_s_at | DDX18    | DEAD/H box polypeptide 18                           | <b>0.0017</b>    | -0.1057           | -0.3871          | 0.4609            | 0.1582        | 1132 ± 90  | 1086 ± 73  | 1076 ± 99  | 1460 ± 223 |
| 208152_s_at | DDX21    | DEAD/H box polypeptide 21                           | 0.4080           | <b>-0.0177</b>    | 0.4509           | 0.4093            | <b>0.0318</b> | 885 ± 53   | 943 ± 101  | 828 ± 32   | 1192 ± 130 |
| 221780_s_at | DDX27    | DEAD/H box polypeptide 27                           | <b>0.0125</b>    | -0.0791           | -0.4820          | 0.3839            | 0.2228        | 162 ± 31   | 152 ± 31   | 208 ± 23   | 237 ± 39   |
| 215693_x_at | DDX27    | DEAD/H box polypeptide 27                           | <b>0.0022</b>    | <b>-0.0129</b>    | -0.2769          | -0.4938           | 0.0625        | 857 ± 64   | 878 ± 80   | 937 ± 56   | 1121 ± 85  |
| 201584_s_at | DDX39    | DEAD/H box polypeptide 39                           | <b>0.0009</b>    | <b>-0.0061</b>    | 0.3404           | -0.4461           | <b>0.0148</b> | 585 ± 43   | 730 ± 89   | 749 ± 47   | 971 ± 114  |
| 204909_at   | DDX6     | DEAD/H box polypeptide 6                            | <b>0.0213</b>    | <b>-0.0113</b>    | 0.1479           | -0.1763           | 0.0629        | 184 ± 27   | 163 ± 21   | 241 ± 21   | 298 ± 60   |
| 207269_at   | DEFA4    | defensin, alpha 4, corticostatin                    | 0.1017           | <b>-0.0383</b>    | 0.3230           | 0.3105            | <b>0.0133</b> | 121 ± 17   | 93 ± 10    | 114 ± 14   | 192 ± 32   |

| Probe set   | Name          | Description                                     | NFT <sub>0</sub> | MMSE <sub>0</sub> | NFT <sub>1</sub> | MMSE <sub>1</sub> | ANOVA         | Control    | Incipient  | Moderate   | Severe     |
|-------------|---------------|-------------------------------------------------|------------------|-------------------|------------------|-------------------|---------------|------------|------------|------------|------------|
| 208024_s_at | DGCR6         | DiGeorge syndrome critical region gene 6        | <b>0.0406</b>    | -0.7078           | <b>0.0413</b>    | -0.1414           | 0.0739        | 771 ± 56   | 849 ± 30   | 1027 ± 59  | 835 ± 113  |
| 206395_at   | DGKG          | diacylglycerol kinase, gamma 90kDa              | <b>0.0084</b>    | <b>-0.0392</b>    | -0.4413          | -0.2059           | <b>0.0488</b> | 415 ± 25   | 441 ± 37   | 550 ± 62   | 632 ± 95   |
| 32032_at    | DGSI          | DiGeorge syndrome critical region gene DGSI     | <b>0.0363</b>    | -0.1100           | 0.2119           | 0.2163            | <b>0.0549</b> | 492 ± 20   | 594 ± 74   | 496 ± 46   | 727 ± 98   |
| 204383_at   | DGSI          | DiGeorge syndrome critical region gene DGSI     | <b>0.0490</b>    | <b>-0.0081</b>    | <b>0.0315</b>    | -0.1106           | 0.0821        | 276 ± 16   | 273 ± 19   | 319 ± 22   | 364 ± 43   |
| 202532_s_at | DHFR          | dihydrofolate reductase                         | <b>0.0360</b>    | -0.0568           | 0.2614           | 0.4053            | 0.0922        | 284 ± 32   | 297 ± 42   | 385 ± 45   | 395 ± 29   |
| 202534_x_at | DHFR          | dihydrofolate reductase                         | 0.1505           | <b>-0.0174</b>    | <b>0.0503</b>    | 0.3447            | <b>0.0405</b> | 546 ± 25   | 644 ± 95   | 733 ± 71   | 810 ± 64   |
| 213632_at   | DHODH         | dihydroorotate dehydrogenase                    | 0.1321           | <b>-0.0017</b>    | -0.3591          | 0.4442            | <b>0.0095</b> | 152 ± 16   | 139 ± 13   | 153 ± 9    | 252 ± 44   |
| 205603_s_at | DIAPH2        | diaphanous homolog 2                            | <b>0.0285</b>    | -0.0631           | 0.1489           | 0.2158            | 0.0581        | 163 ± 17   | 213 ± 49   | 267 ± 20   | 273 ± 41   |
| 206061_s_at | DICER1        | Dicer1, Dcr-1 homolog                           | 0.1312           | <b>-0.0282</b>    | 0.4132           | <b>-0.0319</b>    | 0.1687        | 469 ± 33   | 533 ± 77   | 596 ± 59   | 637 ± 55   |
| 215529_x_at | DIP2          | disco-interacting protein 2 homolog             | <b>0.0041</b>    | -0.1117           | 0.1679           | <b>-0.0180</b>    | 0.4337        | 600 ± 77   | 753 ± 83   | 844 ± 170  | 923 ± 226  |
| 221191_at   | DKFZP434A0131 | DKFZp434A0131 protein                           | <b>0.0032</b>    | <b>-0.0032</b>    | 0.0734           | <b>-0.0199</b>    | <b>0.0211</b> | 230 ± 25   | 271 ± 18   | 398 ± 64   | 399 ± 50   |
| 203486_s_at | DKFZP434A043  | DKFZP434A043 protein                            | <b>0.0054</b>    | <b>-0.0200</b>    | 0.3453           | -0.2310           | <b>0.0136</b> | 675 ± 38   | 678 ± 35   | 808 ± 24   | 772 ± 15   |
| 210129_s_at | DKFZP434B103  | DKFZP434B103 protein                            | <b>0.0011</b>    | -0.0860           | <b>0.0038</b>    | <b>-0.0434</b>    | 0.2406        | 229 ± 14   | 326 ± 29   | 364 ± 36   | 433 ± 138  |
| 212886_at   | DKFZP434C171  | DKFZP434C171 protein                            | 0.1514           | <b>-0.0330</b>    | <b>0.0518</b>    | -0.1119           | 0.1027        | 79 ± 13    | 125 ± 24   | 114 ± 21   | 147 ± 19   |
| 212132_at   | DKFZP434D1335 | DKFZP434D1335 protein                           | <b>0.0327</b>    | -0.1083           | -0.1890          | -0.1157           | 0.5608        | 505 ± 33   | 521 ± 49   | 578 ± 49   | 579 ± 60   |
| 222099_s_at | DKFZP434D1335 | DKFZP434D1335 protein                           | <b>0.0181</b>    | <b>-0.0028</b>    | -0.2633          | -0.1173           | <b>0.0342</b> | 687 ± 47   | 717 ± 26   | 869 ± 30   | 898 ± 102  |
| 204495_s_at | DKFZP434H132  | DKFZP434H132 protein                            | <b>0.0489</b>    | -0.1455           | 0.1412           | 0.4398            | 0.1976        | 169 ± 15   | 211 ± 39   | 191 ± 19   | 257 ± 42   |
| 214699_x_at | DKFZP434J154  | DKFZP434J154 protein                            | <b>0.0064</b>    | <b>-0.0010</b>    | -0.4882          | -0.2742           | <b>0.0004</b> | 287 ± 13   | 293 ± 15   | 326 ± 30   | 535 ± 71   |
| 212665_at   | DKFZP434J214  | DKFZP434J214 protein                            | <b>0.0059</b>    | <b>-0.0015</b>    | 0.3889           | -0.0698           | <b>0.0265</b> | 826 ± 66   | 956 ± 73   | 983 ± 59   | 1192 ± 112 |
| 47553_at    | DKFZP434N014  | DKFZP434N014 protein                            | <b>0.0023</b>    | -0.0667           | -0.1178          | 0.3747            | 0.2084        | 441 ± 58   | 381 ± 38   | 572 ± 93   | 602 ± 104  |
| 221887_s_at | DKFZP434N014  | DKFZP434N014 protein                            | <b>0.0221</b>    | -0.8832           | -0.2535          | 0.4834            | 0.8025        | 369 ± 53   | 434 ± 72   | 474 ± 72   | 413 ± 119  |
| 214766_s_at | DKFZP434N093  | DKFZP434N093 protein                            | <b>0.0077</b>    | <b>-0.0173</b>    | -0.0777          | -0.4819           | 0.0620        | 164 ± 20   | 162 ± 10   | 211 ± 16   | 232 ± 32   |
| 206819_at   | DKFZP434P211  | DKFZp434P211 protein                            | 0.1624           | <b>-0.0045</b>    | -0.3518          | -0.4518           | 0.0917        | 95 ± 15    | 88 ± 22    | 107 ± 13   | 176 ± 44   |
| 212177_at   | DKFZp564B0769 | SR rich protein                                 | <b>0.0193</b>    | <b>-0.0481</b>    | -0.0557          | -0.4678           | 0.0916        | 504 ± 60   | 447 ± 30   | 660 ± 65   | 667 ± 110  |
| 205673_s_at | DKFZP564L0862 | DKFZP564L0862 protein                           | <b>0.0391</b>    | <b>-0.0037</b>    | 0.1477           | -0.3968           | <b>0.0037</b> | 88 ± 11    | 80 ± 12    | 85 ± 9     | 171 ± 31   |
| 216263_s_at | DKFZP564O092  | DKFZP564O092 protein                            | <b>0.0526</b>    | <b>-0.0244</b>    | 0.3606           | -0.2653           | 0.0714        | 48 ± 8     | 57 ± 7     | 56 ± 11    | 95 ± 21    |
| 212447_at   | DKFZP566C134  | DKFZP566C134 protein                            | <b>0.0490</b>    | <b>-0.0008</b>    | <b>-0.0274</b>   | -0.3491           | <b>0.0185</b> | 1166 ± 76  | 1081 ± 86  | 1403 ± 98  | 1466 ± 104 |
| 209703_x_at | DKFZP586A0522 | DKFZP586A0522 protein                           | <b>0.0276</b>    | <b>-0.0183</b>    | <b>0.0191</b>    | -0.0581           | <b>0.0358</b> | 986 ± 135  | 1536 ± 227 | 1930 ± 271 | 1817 ± 338 |
| 213488_at   | DKFZP586B2420 | DKFZP586B2420 protein                           | <b>0.0035</b>    | <b>-0.0001</b>    | <b>0.0478</b>    | -0.0804           | <b>0.0026</b> | 265 ± 31   | 369 ± 46   | 404 ± 33   | 514 ± 54   |
| 212256_at   | DKFZp586H0623 | putative UDP-GalNAc:polypeptide                 | <b>0.0098</b>    | <b>-0.0120</b>    | <b>0.0328</b>    | <b>-0.0510</b>    | <b>0.0363</b> | 415 ± 30   | 521 ± 58   | 624 ± 66   | 591 ± 57   |
| 208015_at   | DKFZP586M0622 | DKFZP586M0622 protein                           | 0.0589           | <b>-0.0262</b>    | 0.3512           | <b>0.0419</b>     | 0.0557        | 145 ± 9    | 128 ± 31   | 144 ± 14   | 207 ± 23   |
| 206257_at   | DKFZP586M1019 | DKFZP586M1019 protein                           | 0.0666           | <b>-0.0043</b>    | 0.0700           | 0.4183            | <b>0.0193</b> | 409 ± 15   | 418 ± 21   | 439 ± 22   | 554 ± 58   |
| 214274_s_at | DLEC1         | deleted in lung and esophageal cancer 1         | <b>0.0222</b>    | -0.2592           | 0.2302           | 0.2129            | 0.3234        | 891 ± 39   | 971 ± 86   | 1061 ± 63  | 1033 ± 88  |
| 205677_s_at | DLEU1         | deleted in lymphocytic leukemia, 1              | 0.3159           | <b>-0.0123</b>    | 0.4122           | 0.4914            | 0.0961        | 271 ± 25   | 302 ± 36   | 306 ± 18   | 384 ± 42   |
| 201681_s_at | DLG5          | discs, large homolog 5                          | <b>0.0001</b>    | <b>-0.0012</b>    | <b>-0.0242</b>   | 0.2884            | <b>0.0057</b> | 459 ± 43   | 493 ± 67   | 689 ± 62   | 718 ± 63   |
| 208216_at   | DLX4          | distal-less homeobox 4                          | 0.1211           | <b>-0.0191</b>    | <b>0.0476</b>    | <b>-0.0375</b>    | 0.0790        | 118 ± 14   | 138 ± 11   | 154 ± 21   | 194 ± 30   |
| 208382_s_at | DMC1          | DMC1 dosage suppressor of mck1 homolog          | 0.2943           | <b>-0.0442</b>    | <b>0.0145</b>    | <b>-0.0010</b>    | <b>0.0125</b> | 121 ± 6    | 187 ± 24   | 132 ± 16   | 219 ± 34   |
| 208386_x_at | DMC1          | DMC1 dosage suppressor of mck1 homolog          | <b>0.0066</b>    | <b>-0.0070</b>    | -0.4795          | -0.1730           | <b>0.0394</b> | 60 ± 8     | 57 ± 8     | 78 ± 10    | 103 ± 18   |
| 207660_at   | DMD           | dystrophin                                      | 0.1838           | <b>-0.0095</b>    | 0.2682           | 0.4240            | <b>0.0290</b> | 168 ± 19   | 140 ± 14   | 171 ± 13   | 252 ± 41   |
| 212730_at   | DMN           | desmuslin                                       | <b>0.0011</b>    | <b>-0.0008</b>    | <b>-0.0045</b>   | -0.4739           | <b>0.0005</b> | 2024 ± 230 | 1812 ± 243 | 3472 ± 380 | 3170 ± 269 |
| 37996_s_at  | DMPK          | dystrophia myotonica-protein kinase             | <b>0.0096</b>    | <b>-0.0077</b>    | -0.4543          | 0.2331            | <b>0.0150</b> | 515 ± 33   | 459 ± 49   | 621 ± 38   | 758 ± 109  |
| 213231_at   | DMWD          | dystrophia myotonica-containing WD repeat motif | 0.0833           | <b>-0.0299</b>    | 0.2695           | -0.0789           | 0.2256        | 249 ± 35   | 270 ± 21   | 328 ± 30   | 339 ± 49   |

| Probe set   | Name     | Description                                                | NFT <sub>0</sub> | MMSE <sub>0</sub> | NFT <sub>1</sub> | MMSE <sub>1</sub> | ANOVA         | Control     | Incipient   | Moderate    | Severe      |
|-------------|----------|------------------------------------------------------------|------------------|-------------------|------------------|-------------------|---------------|-------------|-------------|-------------|-------------|
| 33768_at    | DMWD     | dystrophia myotonica-containing WD repeat motif            | <b>0.0464</b>    | <b>-0.0080</b>    | -0.4711          | 0.3340            | <b>0.0430</b> | 1105 ± 72   | 1202 ± 128  | 1491 ± 125  | 1560 ± 177  |
| 202500_at   | DNAJB2   | DnaJ homolog, subfamily B, member 2                        | <b>0.0000</b>    | -0.0820           | -0.1415          | -0.3158           | 0.2546        | 1044 ± 126  | 1000 ± 134  | 1484 ± 188  | 1612 ± 479  |
| 206782_s_at | DNAJC4   | DnaJ homolog, subfamily C, member 4                        | 0.1528           | <b>-0.0196</b>    | 0.3372           | 0.1169            | 0.0948        | 237 ± 15    | 223 ± 31    | 242 ± 10    | 314 ± 42    |
| 221677_s_at | DONSON   | downstream neighbor of SON                                 | 0.2701           | <b>-0.0462</b>    | -0.0867          | -0.4673           | 0.1337        | 270 ± 31    | 269 ± 29    | 270 ± 18    | 348 ± 24    |
| 220483_s_at | DORFIN   | double ring-finger protein, Dorfin                         | <b>0.0000</b>    | <b>-0.0042</b>    | 0.1766           | 0.4139            | <b>0.0131</b> | 85 ± 10     | 103 ± 22    | 151 ± 21    | 169 ± 25    |
| 222041_at   | DPH2L1   | diphtheria toxin resistance protein                        | 0.0901           | <b>-0.0076</b>    | 0.2567           | 0.4324            | <b>0.0406</b> | 284 ± 20    | 289 ± 26    | 322 ± 24    | 382 ± 30    |
| 201431_s_at | DPYSL3   | dihydropyrimidinase-like 3                                 | 0.1273           | <b>-0.0169</b>    | 0.1126           | -0.3099           | <b>0.0408</b> | 1944 ± 171  | 1972 ± 138  | 3087 ± 420  | 2680 ± 414  |
| 206590_x_at | DRD2     | dopamine receptor D2                                       | <b>0.0231</b>    | <b>-0.0193</b>    | -0.2246          | -0.4492           | <b>0.0327</b> | 250 ± 26    | 251 ± 9     | 273 ± 20    | 359 ± 44    |
| 206032_at   | DSC3     | desmocollin 3                                              | <b>0.0398</b>    | <b>-0.0466</b>    | 0.2311           | 0.1407            | 0.0591        | 105 ± 18    | 102 ± 14    | 133 ± 11    | 191 ± 43    |
| 200606_at   | DSP      | desmoplakin                                                | 0.3852           | <b>-0.0076</b>    | 0.2251           | 0.3171            | <b>0.0227</b> | 157 ± 16    | 189 ± 21    | 286 ± 38    | 347 ± 81    |
| 205741_s_at | DTNA     | dystrobrevin, alpha                                        | 0.0794           | <b>-0.0375</b>    | -0.1328          | -0.2852           | 0.2491        | 781 ± 138   | 714 ± 106   | 934 ± 162   | 1260 ± 331  |
| 38037_at    | DTR      | diphtheria toxin receptor                                  | <b>0.0040</b>    | <b>0.0000</b>     | -0.2801          | 0.3925            | <b>0.0002</b> | 200 ± 16    | 195 ± 20    | 228 ± 19    | 329 ± 25    |
| 205777_at   | DUSP9    | dual specificity phosphatase 9                             | <b>0.0234</b>    | <b>-0.0209</b>    | -0.1090          | 0.2903            | <b>0.0348</b> | 273 ± 38    | 223 ± 21    | 322 ± 32    | 409 ± 60    |
| 208955_at   | DUT      | dUTP pyrophosphatase                                       | 0.2888           | <b>-0.0354</b>    | -0.2468          | 0.3855            | <b>0.0106</b> | 309 ± 24    | 309 ± 16    | 300 ± 9     | 404 ± 34    |
| 222247_at   | DXS542   | putative X-linked retinopathy protein                      | 0.4498           | <b>-0.0042</b>    | 0.1001           | <b>-0.0160</b>    | <b>0.0358</b> | 117 ± 8     | 141 ± 15    | 147 ± 13    | 175 ± 17    |
| 203262_s_at | DXS9928E | DNA segment on chromosome X 9928 expressed sequence        | <b>0.0101</b>    | <b>-0.0060</b>    | -0.1346          | 0.3718            | <b>0.0316</b> | 882 ± 87    | 929 ± 92    | 987 ± 52    | 1250 ± 113  |
| 208713_at   | E1B-AP5  | E1B-55kDa-associated protein 5                             | 0.0926           | <b>-0.0300</b>    | <b>0.0236</b>    | -0.2869           | <b>0.0231</b> | 611 ± 39    | 810 ± 73    | 758 ± 39    | 837 ± 67    |
| 222051_s_at | E2F5     | E2F transcription factor 5, p130-binding                   | <b>0.0540</b>    | <b>-0.0236</b>    | 0.3119           | -0.4168           | <b>0.0105</b> | 81 ± 12     | 121 ± 28    | 91 ± 10     | 219 ± 55    |
| 201749_at   | ECE1     | endothelin converting enzyme 1                             | <b>0.0323</b>    | <b>-0.0025</b>    | 0.4218           | -0.1976           | <b>0.0488</b> | 367 ± 65    | 371 ± 39    | 524 ± 53    | 660 ± 131   |
| 217497_at   | ECGF1    | endothelial cell growth factor 1                           | 0.0970           | <b>-0.0138</b>    | 0.1474           | -0.2875           | <b>0.0452</b> | 106 ± 18    | 76 ± 12     | 109 ± 19    | 158 ± 19    |
| 204858_s_at | ECGF1    | endothelial cell growth factor 1                           | -0.9602          | <b>-0.0401</b>    | 0.4880           | 0.3053            | <b>0.0314</b> | 258 ± 41    | 221 ± 14    | 206 ± 23    | 428 ± 92    |
| 206101_at   | ECM2     | extracellular matrix protein 2                             | <b>0.0530</b>    | <b>-0.0115</b>    | 0.1719           | -0.1344           | <b>0.0308</b> | 249 ± 29    | 301 ± 44    | 493 ± 112   | 471 ± 48    |
| 220048_at   | EDAR     | ectodysplasin 1, anhidrotic receptor                       | <b>0.0458</b>    | -0.0953           | 0.1863           | 0.1967            | <b>0.0539</b> | 270 ± 26    | 305 ± 62    | 268 ± 14    | 417 ± 48    |
| 209058_at   | EDF1     | endothelial differentiation-related factor 1               | <b>0.0272</b>    | -0.4963           | 0.1657           | 0.1372            | 0.6451        | 1566 ± 70   | 1531 ± 71   | 1730 ± 205  | 1798 ± 251  |
| 204464_s_at | EDNRA    | endothelin receptor type A                                 | <b>0.0209</b>    | -0.1151           | 0.0798           | <b>-0.0423</b>    | 0.4552        | 178 ± 16    | 211 ± 21    | 217 ± 22    | 229 ± 33    |
| 200919_at   | EDR2     | early development regulator 2                              | 0.4775           | <b>-0.0291</b>    | 0.2193           | 0.4029            | 0.0627        | 1650 ± 93   | 1859 ± 107  | 1756 ± 85   | 2114 ± 182  |
| 213614_x_at | EEF1A1   | eukaryotic translation elongation factor 1 alpha 1         | <b>0.0016</b>    | -0.0986           | 0.4804           | 0.1604            | <b>0.0275</b> | 16900 ± 813 | 16222 ± 317 | 1548 ± 1268 | 9010 ± 1956 |
| 213477_x_at | EEF1A1   | eukaryotic translation elongation factor 1 alpha 1         | <b>0.0022</b>    | -0.1639           | 0.3792           | -0.1628           | <b>0.0209</b> | 0405 ± 1281 | 21758 ± 869 | 374 ± 1469  | 2836 ± 2475 |
| 213583_x_at | EEF1A1   | eukaryotic translation elongation factor 1 alpha 1         | <b>0.0057</b>    | -0.0949           | -0.4400          | -0.3968           | <b>0.0019</b> | 12703 ± 735 | 13073 ± 203 | 17045 ± 859 | 14179 ± 984 |
| 203113_s_at | EEF1D    | eukaryotic translation elongation factor 1 delta           | <b>0.0083</b>    | -0.2413           | -0.2392          | 0.3612            | 0.4500        | 2217 ± 280  | 2326 ± 314  | 2813 ± 234  | 2750 ± 448  |
| 200689_x_at | EEF1G    | eukaryotic translation elongation factor 1 gamma           | <b>0.0189</b>    | -0.5812           | 0.1266           | -0.2644           | 0.1342        | 6523 ± 381  | 7297 ± 471  | 8204 ± 669  | 6937 ± 528  |
| 201843_s_at | EFEMP1   | EGF-containing fibulin-like extracellular matrix protein 1 | 0.1235           | <b>-0.0246</b>    | 0.2269           | <b>-0.0413</b>    | 0.2709        | 518 ± 50    | 673 ± 145   | 812 ± 189   | 935 ± 191   |
| 206580_s_at | EFEMP2   | EGF-containing fibulin-like extracellular matrix protein 2 | <b>0.0049</b>    | <b>-0.0071</b>    | <b>0.0496</b>    | -0.0812           | <b>0.0171</b> | 682 ± 79    | 701 ± 61    | 1081 ± 90   | 1051 ± 173  |
| 209356_x_at | EFEMP2   | EGF-containing fibulin-like extracellular matrix protein 2 | <b>0.0006</b>    | <b>-0.0194</b>    | 0.2244           | 0.3746            | <b>0.0087</b> | 368 ± 24    | 335 ± 17    | 524 ± 34    | 480 ± 70    |
| 202023_at   | EFNA1    | ephrin-A1                                                  | <b>0.0080</b>    | <b>-0.0304</b>    | -0.0845          | -0.3531           | 0.1948        | 334 ± 51    | 325 ± 57    | 468 ± 65    | 517 ± 115   |
| 204400_at   | EFS2     | signal transduction protein                                | <b>0.0025</b>    | <b>-0.0284</b>    | 0.0723           | -0.2872           | 0.1001        | 575 ± 52    | 765 ± 115   | 806 ± 79    | 1099 ± 275  |
| 206254_at   | EGF      | epidermal growth factor                                    | 0.0576           | <b>-0.0481</b>    | -0.3784          | -0.4958           | 0.0743        | 84 ± 7      | 98 ± 15     | 86 ± 21     | 156 ± 35    |
| 211551_at   | EGFR     | epidermal growth factor receptor oncogene homolog, avian)  | 0.2659           | <b>-0.0047</b>    | 0.2270           | -0.1849           | <b>0.0266</b> | 235 ± 24    | 255 ± 16    | 284 ± 19    | 342 ± 33    |
| 201984_s_at | EGFR     | epidermal growth factor receptor oncogene homolog, avian)  | 0.3982           | <b>-0.0187</b>    | 0.4366           | -0.1343           | 0.1500        | 271 ± 33    | 273 ± 22    | 308 ± 16    | 351 ± 25    |
| 220956_s_at | EGLN2    | egl nine homolog 2                                         | 0.0983           | <b>-0.0275</b>    | 0.2139           | -0.1987           | 0.2456        | 622 ± 54    | 591 ± 55    | 649 ± 31    | 739 ± 55    |
| 208112_x_at | EHD1     | EH-domain containing 1                                     | <b>0.0002</b>    | <b>0.0000</b>     | 0.2233           | -0.0891           | <b>0.0000</b> | 264 ± 33    | 348 ± 29    | 453 ± 37    | 609 ± 61    |
| 209039_x_at | EHD1     | EH-domain containing 1                                     | <b>0.0047</b>    | <b>-0.0014</b>    | -0.3383          | -0.3237           | <b>0.0007</b> | 717 ± 47    | 786 ± 69    | 841 ± 64    | 1257 ± 141  |

| Probe set   | Name    | Description                                                    | NFT <sub>0</sub> | MMSE <sub>0</sub> | NFT <sub>1</sub> | MMSE <sub>1</sub> | ANOVA         | Control    | Incipient  | Moderate   | Severe      |
|-------------|---------|----------------------------------------------------------------|------------------|-------------------|------------------|-------------------|---------------|------------|------------|------------|-------------|
| 212351_at   | EIF2B5  | eukaryotic translation initiation factor 2B, subunit 5 epsilon | <b>0.0149</b>    | -0.0731           | <b>-0.0084</b>   | -0.2207           | 0.2530        | 423 ± 18   | 398 ± 29   | 437 ± 31   | 485 ± 38    |
| 218287_s_at | EIF2C1  | eukaryotic translation initiation factor 2C, 1                 | <b>0.0175</b>    | -0.1229           | <b>0.0238</b>    | -0.4644           | 0.1303        | 476 ± 30   | 586 ± 56   | 592 ± 30   | 663 ± 89    |
| 203462_x_at | EIF3S9  | eukaryotic translation initiation factor 3, subunit 9 eta      | <b>0.0066</b>    | <b>-0.0008</b>    | -0.4073          | 0.4087            | <b>0.0073</b> | 1209 ± 43  | 1209 ± 83  | 1354 ± 57  | 1521 ± 74   |
| 211937_at   | EIF4B   | eukaryotic translation initiation factor 4B                    | <b>0.0003</b>    | -0.0967           | 0.0971           | 0.3661            | 0.1363        | 1205 ± 67  | 1275 ± 176 | 1660 ± 136 | 1506 ± 208  |
| 208707_at   | EIF5    | eukaryotic translation initiation factor 5                     | <b>0.0526</b>    | <b>-0.0043</b>    | 0.1410           | -0.2343           | <b>0.0385</b> | 549 ± 24   | 568 ± 40   | 648 ± 50   | 695 ± 36    |
| 219325_s_at | ELAC1   | elaC homolog 1                                                 | <b>0.0252</b>    | <b>-0.0430</b>    | <b>0.0539</b>    | 0.4195            | <b>0.0400</b> | 48 ± 8     | 66 ± 17    | 66 ± 5     | 98 ± 14     |
| 203822_s_at | ELF2    | E74-like factor 2                                              | 0.2468           | <b>-0.0281</b>    | -0.3003          | -0.4960           | <b>0.0337</b> | 774 ± 47   | 849 ± 77   | 748 ± 41   | 1010 ± 83   |
| 31845_at    | ELF4    | E74-like factor 4                                              | 0.1010           | <b>-0.0203</b>    | 0.2169           | 0.3826            | <b>0.0539</b> | 97 ± 14    | 126 ± 27   | 112 ± 10   | 182 ± 34    |
| 203617_x_at | ELK1    | ELK1, member of ETS oncogene family                            | <b>0.0366</b>    | -0.1253           | 0.3243           | 0.4405            | 0.2507        | 1084 ± 116 | 1339 ± 214 | 1423 ± 72  | 1547 ± 242  |
| 220366_at   | ELSPBP1 | epididymal sperm binding protein 1                             | <b>0.0329</b>    | -0.0602           | 0.1542           | 0.4590            | 0.1215        | 153 ± 17   | 186 ± 31   | 183 ± 16   | 259 ± 53    |
| 204398_s_at | EML2    | echinoderm microtubule associated protein like 2               | 0.0821           | <b>-0.0482</b>    | 0.3391           | -0.3220           | 0.0842        | 591 ± 60   | 662 ± 57   | 591 ± 33   | 819 ± 108   |
| 201324_at   | EMP1    | epithelial membrane protein 1                                  | <b>0.0170</b>    | <b>-0.0010</b>    | -0.3348          | -0.0792           | <b>0.0249</b> | 232 ± 41   | 216 ± 45   | 347 ± 46   | 501 ± 117   |
| 213895_at   | EMP1    | epithelial membrane protein 1                                  | <b>0.0086</b>    | <b>-0.0379</b>    | 0.4527           | 0.3056            | 0.1096        | 103 ± 16   | 107 ± 16   | 121 ± 13   | 155 ± 17    |
| 217820_s_at | ENAH    | enabled homolog                                                | <b>0.0499</b>    | <b>-0.0125</b>    | 0.2796           | <b>-0.0357</b>    | <b>0.0402</b> | 1003 ± 42  | 1081 ± 99  | 1448 ± 189 | 1348 ± 61   |
| 37408_at    | ENDO180 | endocytic receptor                                             | 0.0634           | <b>-0.0157</b>    | 0.0815           | -0.0639           | <b>0.0048</b> | 436 ± 41   | 509 ± 23   | 384 ± 29   | 751 ± 127   |
| 213579_s_at | EP300   | E1A binding protein p300                                       | <b>0.0097</b>    | <b>-0.0009</b>    | 0.1249           | <b>-0.0004</b>    | <b>0.0051</b> | 203 ± 25   | 266 ± 19   | 246 ± 21   | 348 ± 36    |
| 212376_s_at | EP400   | E1A binding protein p400                                       | <b>0.0274</b>    | -0.2770           | <b>0.0508</b>    | 0.4744            | 0.2432        | 371 ± 17   | 379 ± 16   | 445 ± 18   | 421 ± 53    |
| 210825_s_at | EPB72   | erythrocyte membrane protein band 7.2                          | <b>0.0250</b>    | -0.1139           | 0.1575           | 0.4327            | <b>0.0259</b> | 9039 ± 421 | 9554 ± 256 | 1051 ± 622 | 10300 ± 434 |
| 201061_s_at | EPB72   | erythrocyte membrane protein band 7.2                          | <b>0.0032</b>    | <b>-0.0020</b>    | 0.3088           | -0.3868           | <b>0.0282</b> | 2615 ± 197 | 2692 ± 271 | 3102 ± 203 | 3571 ± 263  |
| 209963_s_at | EPOR    | erythropoietin receptor                                        | <b>0.0052</b>    | -0.0703           | 0.1661           | -0.0774           | 0.1755        | 141 ± 11   | 164 ± 14   | 163 ± 9    | 188 ± 23    |
| 37986_at    | EPOR    | erythropoietin receptor                                        | 0.0984           | <b>-0.0019</b>    | -0.2489          | -0.3140           | <b>0.0129</b> | 223 ± 21   | 210 ± 33   | 216 ± 10   | 344 ± 47    |
| 200842_s_at | EPRS    | glutamyl-prolyl-tRNA synthetase                                | <b>0.0067</b>    | -0.0694           | -0.4863          | -0.1668           | 0.1271        | 594 ± 52   | 576 ± 58   | 682 ± 75   | 844 ± 135   |
| 202609_at   | EPS8    | epidermal growth factor receptor pathway substrate 8           | 0.4848           | <b>-0.0113</b>    | 0.3343           | <b>-0.0202</b>    | 0.3262        | 813 ± 39   | 849 ± 102  | 1025 ± 88  | 1024 ± 174  |
| 212087_s_at | ERAL1   | Era G-protein-like 1                                           | 0.2567           | <b>-0.0210</b>    | <b>0.0372</b>    | <b>-0.0020</b>    | 0.0745        | 589 ± 26   | 656 ± 33   | 633 ± 55   | 783 ± 75    |
| 217941_s_at | ERBB2IP | erbB2 interacting protein                                      | <b>0.0126</b>    | <b>-0.0033</b>    | -0.4232          | <b>-0.0457</b>    | <b>0.0032</b> | 2624 ± 324 | 3068 ± 269 | 4899 ± 635 | 4093 ± 386  |
| 206794_at   | ERBB4   | v-erb-a erythroblastic leukemia viral oncogene homolog 4       | <b>0.0094</b>    | -0.5273           | 0.1832           | -0.2239           | 0.7749        | 86 ± 11    | 97 ± 11    | 97 ± 9     | 108 ± 25    |
| 207347_at   | ERCC6   | excision repair cross-complementing rodent repair def. 6       | 0.0610           | <b>-0.0303</b>    | 0.1977           | -0.3328           | 0.0963        | 225 ± 23   | 227 ± 17   | 247 ± 23   | 326 ± 50    |
| 203643_at   | ERF     | Ets2 repressor factor                                          | <b>0.0076</b>    | <b>-0.0039</b>    | <b>0.0463</b>    | -0.1209           | <b>0.0003</b> | 181 ± 32   | 363 ± 33   | 447 ± 52   | 420 ± 48    |
| 208958_at   | ERp44   | endoplasmic reticulum resident protein 44 kDa                  | 0.6145           | <b>-0.0404</b>    | 0.1841           | -0.0993           | 0.0730        | 154 ± 11   | 150 ± 9    | 213 ± 22   | 188 ± 24    |
| 208658_at   | ERP70   | protein disulfide isomerase related protein                    | <b>0.0124</b>    | -0.0576           | -0.3718          | 0.4224            | 0.3098        | 369 ± 40   | 361 ± 45   | 413 ± 37   | 485 ± 74    |
| 213873_at   | ESDN    | endothelial and smooth muscle cell-derived neuropilin-like     | 0.0565           | <b>-0.0356</b>    | <b>0.0192</b>    | -0.1737           | 0.1039        | 152 ± 10   | 205 ± 20   | 195 ± 16   | 256 ± 53    |
| 202081_at   | ETR101  | immediate early protein                                        | 0.2720           | <b>-0.0060</b>    | -0.2287          | 0.2698            | <b>0.0254</b> | 1192 ± 82  | 1165 ± 157 | 1286 ± 107 | 1676 ± 141  |
| 204774_at   | EVI2A   | ecotropic viral integration site 2A                            | 0.6624           | <b>-0.0052</b>    | 0.2425           | -0.3038           | 0.2040        | 1650 ± 156 | 1820 ± 291 | 2110 ± 241 | 2297 ± 237  |
| 211742_s_at | EVI2B   | ecotropic viral integration site 2B                            | 0.5752           | <b>-0.0168</b>    | 0.3591           | -0.0897           | 0.2783        | 438 ± 56   | 486 ± 57   | 508 ± 40   | 578 ± 42    |
| 209214_s_at | EWSR1   | Ewing sarcoma breakpoint region 1                              | <b>0.0184</b>    | <b>-0.0015</b>    | 0.3634           | <b>-0.0204</b>    | <b>0.0153</b> | 1151 ± 47  | 1317 ± 96  | 1371 ± 42  | 1466 ± 69   |
| 50376_at    | EZF-2   | endothelial zinc finger protein 2                              | <b>0.0047</b>    | -0.0929           | <b>0.0357</b>    | -0.4982           | 0.0750        | 943 ± 78   | 1307 ± 234 | 1181 ± 136 | 1619 ± 229  |
| 218707_at   | EZF-2   | endothelial zinc finger protein 2                              | <b>0.0040</b>    | <b>-0.0007</b>    | -0.3312          | -0.2959           | <b>0.0047</b> | 218 ± 37   | 151 ± 27   | 323 ± 42   | 395 ± 62    |
| 203989_x_at | F2R     | coagulation factor II receptor                                 | 0.2415           | <b>-0.0155</b>    | <b>0.0442</b>    | -0.0761           | <b>0.0227</b> | 49 ± 8     | 67 ± 7     | 63 ± 10    | 100 ± 18    |
| 219429_at   | FAAH    | fatty acid hydroxylase                                         | 0.7656           | <b>-0.0105</b>    | 0.4165           | -0.4211           | 0.1621        | 1173 ± 105 | 1066 ± 129 | 1304 ± 156 | 1625 ± 264  |
| 201963_at   | FACL2   | fatty-acid-Coenzyme A ligase, long-chain 2                     | 0.9855           | <b>-0.0127</b>    | -0.1234          | -0.2482           | 0.1972        | 1446 ± 132 | 1425 ± 189 | 1375 ± 132 | 1975 ± 350  |
| 208962_s_at | FADS1   | fatty acid desaturase 1                                        | <b>0.0077</b>    | <b>-0.0010</b>    | 0.0692           | <b>-0.0475</b>    | <b>0.0059</b> | 1176 ± 114 | 1536 ± 158 | 2085 ± 232 | 2454 ± 398  |
| 204257_at   | FADS3   | fatty acid desaturase 3                                        | <b>0.0517</b>    | <b>-0.0355</b>    | 0.4612           | 0.1031            | 0.1085        | 490 ± 26   | 472 ± 25   | 499 ± 40   | 629 ± 78    |

| Probe set   | Name     | Description                                              | NFT <sub>0</sub> | MMSE <sub>0</sub> | NFT <sub>1</sub> | MMSE <sub>1</sub> | ANOVA         | Control    | Incipient   | Moderate   | Severe      |
|-------------|----------|----------------------------------------------------------|------------------|-------------------|------------------|-------------------|---------------|------------|-------------|------------|-------------|
| 209405_s_at | FAM3A    | family with sequence similarity 3, member A              | <b>0.0042</b>    | -0.2095           | <b>0.0299</b>    | 0.2812            | 0.1813        | 267 ± 9    | 341 ± 45    | 397 ± 54   | 369 ± 52    |
| 38043_at    | FAM3A    | family with sequence similarity 3, member A              | <b>0.0027</b>    | <b>-0.0302</b>    | 0.0835           | -0.3574           | 0.0887        | 462 ± 37   | 483 ± 56    | 503 ± 25   | 709 ± 134   |
| 220255_at   | FANCE    | Fanconi anemia, complementation group E                  | <b>0.0172</b>    | <b>-0.0410</b>    | -0.4864          | -0.1755           | 0.1587        | 106 ± 13   | 95 ± 24     | 123 ± 12   | 155 ± 23    |
| 202995_s_at | FBLN1    | fibulin 1                                                | <b>0.0296</b>    | -0.1146           | 0.3952           | 0.2100            | 0.2188        | 190 ± 15   | 188 ± 17    | 200 ± 16   | 272 ± 59    |
| 202766_s_at | FBN1     | fibrillin 1                                              | <b>0.0393</b>    | <b>-0.0008</b>    | -0.3708          | <b>-0.0354</b>    | <b>0.0410</b> | 303 ± 25   | 313 ± 18    | 385 ± 24   | 395 ± 39    |
| 203184_at   | FBN2     | fibrillin 2                                              | <b>0.0038</b>    | <b>-0.0005</b>    | <b>0.0026</b>    | -0.1568           | <b>0.0004</b> | 73 ± 8     | 100 ± 4     | 95 ± 10    | 156 ± 21    |
| 213940_s_at | FBP17    | formin-binding protein 17                                | <b>0.0310</b>    | -0.2360           | <b>0.0351</b>    | -0.1219           | 0.0597        | 266 ± 35   | 377 ± 65    | 485 ± 71   | 346 ± 52    |
| 212288_at   | FBP17    | formin-binding protein 17                                | 0.0699           | <b>-0.0131</b>    | 0.3263           | -0.1196           | 0.0979        | 1483 ± 125 | 1845 ± 265  | 1954 ± 55  | 2071 ± 201  |
| 208988_at   | FBXL11   | F-box and leucine-rich repeat protein 11                 | <b>0.0420</b>    | -0.3816           | -0.3414          | -0.2992           | 0.4891        | 917 ± 80   | 790 ± 31    | 958 ± 52   | 941 ± 111   |
| 209005_at   | FBXL5    | F-box and leucine-rich repeat protein 5                  | <b>0.0149</b>    | -0.1215           | 0.4708           | 0.3412            | 0.3649        | 1150 ± 68  | 1165 ± 102  | 1220 ± 61  | 1339 ± 90   |
| 213249_at   | FBXL7    | F-box and leucine-rich repeat protein 7                  | 0.0883           | <b>-0.0007</b>    | 0.4879           | -0.2287           | <b>0.0496</b> | 580 ± 50   | 623 ± 32    | 719 ± 42   | 774 ± 74    |
| 219305_x_at | FBXO2    | F-box only protein 2                                     | 0.1118           | <b>-0.0089</b>    | -0.4853          | -0.1051           | 0.1061        | 1464 ± 100 | 1512 ± 186  | 1764 ± 156 | 2076 ± 273  |
| 212991_at   | FBXO9    | F-box only protein 9                                     | <b>0.0175</b>    | -0.0685           | -0.3605          | -0.3832           | 0.1810        | 534 ± 53   | 464 ± 29    | 675 ± 76   | 814 ± 207   |
| 214623_at   | FBXW3    | F-box and WD-40 domain protein 3                         | <b>0.0084</b>    | <b>-0.0163</b>    | <b>0.0019</b>    | -0.0990           | <b>0.0179</b> | 34 ± 9     | 69 ± 18     | 80 ± 18    | 134 ± 35    |
| 208647_at   | FDFT1    | farnesyl-diphosphate farnesyltransferase 1               | 0.1174           | <b>-0.0001</b>    | <b>-0.0372</b>   | -0.3202           | <b>0.0044</b> | 3066 ± 241 | 2739 ± 279  | 3693 ± 128 | 4054 ± 317  |
| 201275_at   | FDPS     | farnesyl diphosphate synthase                            | 0.1716           | <b>-0.0040</b>    | -0.2270          | -0.2568           | <b>0.0348</b> | 495 ± 36   | 491 ± 41    | 623 ± 47   | 646 ± 52    |
| 37384_at    | FEM-2    | partner of PIX 2                                         | <b>0.0099</b>    | <b>-0.0029</b>    | -0.0720          | 0.2527            | <b>0.0063</b> | 601 ± 49   | 481 ± 38    | 687 ± 45   | 819 ± 90    |
| 214417_s_at | FETUB    | fetuin B                                                 | <b>0.0390</b>    | <b>-0.0034</b>    | <b>0.0538</b>    | -0.2644           | <b>0.0002</b> | 74 ± 7     | 111 ± 9     | 95 ± 9     | 152 ± 18    |
| 203562_at   | FEZ1     | fasciculation and elongation protein zeta 1              | 0.1361           | <b>-0.0112</b>    | 0.4477           | 0.4564            | 0.1458        | 8620 ± 513 | 9094 ± 1000 | 9994 ± 861 | 11074 ± 716 |
| 210704_at   | FEZ2     | fasciculation and elongation protein zeta 2              | <b>0.0206</b>    | -0.0694           | 0.2365           | 0.3726            | 0.0849        | 125 ± 10   | 157 ± 16    | 148 ± 15   | 194 ± 30    |
| 205117_at   | FGF1     | fibroblast growth factor 1                               | <b>0.0335</b>    | <b>-0.0466</b>    | 0.3218           | -0.2871           | 0.1717        | 2890 ± 414 | 3520 ± 567  | 4195 ± 455 | 4073 ± 418  |
| 214284_s_at | FGF18    | fibroblast growth factor 18                              | <b>0.0350</b>    | -0.2066           | 0.1269           | -0.4345           | 0.1048        | 79 ± 10    | 78 ± 11     | 130 ± 18   | 106 ± 25    |
| 211535_s_at | FGFR1    | fibroblast growth factor receptor 1                      | <b>0.0308</b>    | <b>-0.0134</b>    | -0.3851          | -0.0706           | 0.1287        | 553 ± 44   | 624 ± 78    | 706 ± 85   | 776 ± 64    |
| 207822_at   | FGFR1    | fibroblast growth factor receptor 1                      | <b>0.0419</b>    | <b>-0.0219</b>    | -0.3246          | 0.2605            | 0.0933        | 162 ± 23   | 132 ± 13    | 186 ± 30   | 230 ± 28    |
| 204379_s_at | FGFR3    | fibroblast growth factor receptor 3                      | <b>0.0009</b>    | <b>-0.0075</b>    | <b>0.0018</b>    | -0.1005           | <b>0.0349</b> | 1925 ± 183 | 2388 ± 291  | 3023 ± 414 | 3684 ± 718  |
| 205305_at   | FGL1     | fibrinogen-like 1                                        | <b>0.0010</b>    | <b>-0.0038</b>    | 0.2055           | <b>-0.0102</b>    | <b>0.0214</b> | 158 ± 14   | 189 ± 13    | 223 ± 23   | 286 ± 50    |
| 203734_at   | FHX      | FOXJ2 forkhead factor                                    | <b>0.0165</b>    | <b>-0.0008</b>    | 0.0703           | -0.1768           | <b>0.0004</b> | 538 ± 24   | 628 ± 47    | 556 ± 30   | 832 ± 71    |
| 40850_at    | FKBP8    | FK506 binding protein 8, 38kDa                           | <b>0.0214</b>    | -0.8156           | -0.3324          | -0.3505           | 0.1388        | 789 ± 109  | 959 ± 155   | 1328 ± 141 | 871 ± 279   |
| 222065_s_at | FLII     | flightless I homolog                                     | <b>0.0534</b>    | <b>-0.0288</b>    | -0.4035          | <b>-0.0297</b>    | 0.2726        | 324 ± 17   | 359 ± 46    | 386 ± 10   | 395 ± 31    |
| 218993_at   | FLJ10581 | putative RNA methyltransferase                           | <b>0.0125</b>    | -0.1307           | 0.1828           | <b>-0.0363</b>    | <b>0.0507</b> | 348 ± 13   | 364 ± 13    | 329 ± 30   | 430 ± 36    |
| 218485_s_at | FLJ11320 | GDP-fucose transporter 1                                 | 0.1421           | <b>-0.0224</b>    | 0.1217           | <b>-0.0303</b>    | <b>0.0163</b> | 182 ± 15   | 202 ± 12    | 180 ± 17   | 270 ± 33    |
| 218658_s_at | FLJ12934 | likely ortholog of mouse actin-related protein 8 homolog | <b>0.0081</b>    | <b>-0.0206</b>    | <b>0.0037</b>    | -0.1453           | <b>0.0018</b> | 205 ± 13   | 313 ± 38    | 300 ± 7    | 330 ± 21    |
| 208919_s_at | FLJ13052 | NAD kinase                                               | 0.1013           | <b>-0.0038</b>    | -0.2803          | 0.1632            | <b>0.0083</b> | 637 ± 23   | 640 ± 45    | 798 ± 37   | 823 ± 69    |
| 219020_at   | FLJ14249 | hypothetical protein FLJ14249                            | <b>0.0129</b>    | <b>-0.0078</b>    | 0.1252           | 0.4713            | <b>0.0262</b> | 572 ± 40   | 666 ± 72    | 645 ± 27   | 840 ± 93    |
| 220349_s_at | FLJ21865 | endo-beta-N-acetylglucosaminidase                        | <b>0.0002</b>    | <b>-0.0027</b>    | 0.4989           | -0.2325           | <b>0.0199</b> | 290 ± 28   | 307 ± 34    | 353 ± 50   | 515 ± 84    |
| 65635_at    | FLJ21865 | endo-beta-N-acetylglucosaminidase                        | <b>0.0018</b>    | <b>-0.0152</b>    | 0.2788           | 0.4974            | <b>0.0397</b> | 1096 ± 83  | 1206 ± 141  | 1257 ± 113 | 1711 ± 248  |
| 219677_at   | FLJ22393 | SPRY domain-containing SOCS box protein SSB-1            | <b>0.0150</b>    | -0.1910           | 0.2423           | 0.4844            | 0.2943        | 271 ± 33   | 347 ± 60    | 337 ± 25   | 406 ± 76    |
| 220078_at   | FLJ23277 | FLJ23277 protein                                         | <b>0.0286</b>    | <b>-0.0037</b>    | 0.2386           | -0.0590           | <b>0.0332</b> | 153 ± 22   | 197 ± 23    | 218 ± 14   | 255 ± 34    |
| 213746_s_at | FLNA     | filamin A, alpha                                         | <b>0.0389</b>    | -0.0994           | 0.2038           | 0.3077            | 0.2700        | 211 ± 17   | 204 ± 28    | 310 ± 52   | 296 ± 74    |
| 214752_x_at | FLNA     | filamin A, alpha                                         | <b>0.0016</b>    | <b>-0.0016</b>    | 0.0618           | 0.3999            | <b>0.0197</b> | 375 ± 32   | 376 ± 33    | 504 ± 52   | 631 ± 103   |
| 200859_x_at | FLNA     | filamin A, alpha                                         | <b>0.0088</b>    | <b>-0.0235</b>    | 0.1556           | 0.4354            | 0.1889        | 593 ± 51   | 583 ± 83    | 705 ± 57   | 810 ± 124   |
| 207876_s_at | FLNC     | filamin C, gamma                                         | <b>0.0000</b>    | <b>-0.0031</b>    | <b>0.0096</b>    | -0.2264           | <b>0.0220</b> | 296 ± 28   | 363 ± 88    | 487 ± 52   | 576 ± 90    |

| Probe set   | Name    | Description                                              | NFT <sub>0</sub> | MMSE <sub>0</sub> | NFT <sub>1</sub> | MMSE <sub>1</sub> | ANOVA         | Control     | Incipient   | Moderate    | Severe      |
|-------------|---------|----------------------------------------------------------|------------------|-------------------|------------------|-------------------|---------------|-------------|-------------|-------------|-------------|
| 211726_s_at | FMO2    | flavin containing monooxygenase 2                        | <b>0.0111</b>    | <b>-0.0001</b>    | 0.1205           | -0.2048           | <b>0.0038</b> | 213 ± 17    | 221 ± 11    | 313 ± 27    | 371 ± 52    |
| 213729_at   | FNBP3   | formin binding protein 3                                 | <b>0.0244</b>    | -0.1181           | 0.4285           | -0.0703           | 0.1529        | 743 ± 71    | 909 ± 74    | 866 ± 53    | 982 ± 99    |
| 218053_at   | FNBP3   | formin binding protein 3                                 | <b>0.0032</b>    | <b>-0.0028</b>    | <b>0.0247</b>    | <b>-0.0094</b>    | <b>0.0012</b> | 820 ± 51    | 979 ± 63    | 1334 ± 126  | 1194 ± 80   |
| 211303_x_at | FOLH1   | folate hydrolase 1                                       | 0.5866           | <b>-0.0116</b>    | 0.4028           | -0.0704           | 0.0734        | 209 ± 15    | 182 ± 33    | 319 ± 66    | 389 ± 88    |
| 202724_s_at | FOXO1A  | forkhead box O1A                                         | <b>0.0008</b>    | <b>0.0000</b>     | 0.3261           | -0.1806           | <b>0.0002</b> | 429 ± 27    | 514 ± 47    | 638 ± 44    | 745 ± 56    |
| 204131_s_at | FOXO3A  | forkhead box O3A                                         | <b>0.0016</b>    | <b>-0.0039</b>    | 0.2351           | -0.2294           | <b>0.0246</b> | 1779 ± 163  | 1890 ± 150  | 2030 ± 170  | 2696 ± 329  |
| 219889_at   | FRAT1   | frequently rearranged in advanced T-cell lymphomas       | <b>0.0287</b>    | <b>-0.0351</b>    | 0.1516           | 0.3567            | <b>0.0079</b> | 253 ± 17    | 290 ± 35    | 269 ± 15    | 387 ± 36    |
| 203592_s_at | FSTL3   | folistatin-like 3                                        | <b>0.0135</b>    | -0.0880           | -0.1028          | 0.3068            | 0.1070        | 342 ± 33    | 340 ± 38    | 331 ± 31    | 517 ± 107   |
| 214211_at   | FTH1    | ferritin, heavy polypeptide 1                            | <b>0.0031</b>    | <b>-0.0120</b>    | 0.0583           | -0.2873           | <b>0.0508</b> | 5115 ± 224  | 5411 ± 567  | 6197 ± 500  | 6658 ± 227  |
| 213187_x_at | FTL     | ferritin, light polypeptide                              | <b>0.0008</b>    | -0.1316           | 0.3645           | 0.1251            | 0.1597        | 12189 ± 926 | 1772 ± 1300 | 1508 ± 1226 | 4232 ± 1771 |
| 220856_x_at | FTL     | ferritin, light polypeptide                              | <b>0.0000</b>    | <b>-0.0276</b>    | 0.2405           | -0.4983           | 0.0794        | 2021 ± 198  | 2210 ± 258  | 2776 ± 225  | 2989 ± 451  |
| 210608_s_at | FUT2    | fucosyltransferase 2                                     | <b>0.0025</b>    | <b>-0.0411</b>    | <b>0.0107</b>    | -0.3321           | 0.0771        | 150 ± 8     | 165 ± 12    | 164 ± 13    | 209 ± 27    |
| 202419_at   | FVT1    | follicular lymphoma variant translocation 1              | <b>0.0037</b>    | <b>-0.0255</b>    | 0.2682           | <b>-0.0355</b>    | 0.1621        | 1159 ± 84   | 1279 ± 108  | 1477 ± 108  | 1416 ± 139  |
| 201635_s_at | FXR1    | fragile X mental retardation, autosomal homolog 1        | <b>0.0053</b>    | -0.2314           | -0.4560          | -0.3281           | 0.4178        | 339 ± 36    | 349 ± 38    | 322 ± 39    | 468 ± 125   |
| 218204_s_at | FYCO1   | FYVE and coiled-coil domain containing 1                 | <b>0.0017</b>    | <b>-0.0002</b>    | -0.3794          | -0.2551           | <b>0.0004</b> | 189 ± 24    | 190 ± 11    | 214 ± 22    | 338 ± 30    |
| 212486_s_at | FYN     | FYN oncogene related to SRC, FGR, YES                    | 0.1121           | <b>-0.0214</b>    | 0.2110           | <b>-0.0053</b>    | 0.0766        | 729 ± 44    | 807 ± 99    | 1057 ± 118  | 954 ± 113   |
| 210105_s_at | FYN     | FYN oncogene related to SRC, FGR, YES                    | <b>0.0168</b>    | <b>-0.0301</b>    | 0.1020           | -0.1987           | 0.0776        | 4639 ± 246  | 5050 ± 186  | 5724 ± 525  | 5746 ± 313  |
| 219764_at   | FZD10   | frizzled homolog 10                                      | 0.2412           | <b>-0.0097</b>    | 0.0959           | -0.2894           | 0.0755        | 154 ± 14    | 174 ± 25    | 161 ± 11    | 219 ± 21    |
| 209414_at   | FZR1    | Fzr1 protein                                             | 0.0802           | <b>-0.0120</b>    | <b>0.0051</b>    | <b>-0.0004</b>    | <b>0.0042</b> | 114 ± 9     | 162 ± 8     | 177 ± 15    | 194 ± 22    |
| 209416_s_at | FZR1    | Fzr1 protein                                             | 0.2781           | <b>-0.0435</b>    | 0.4026           | -0.3404           | 0.3116        | 360 ± 31    | 409 ± 61    | 409 ± 16    | 471 ± 38    |
| 202275_at   | G6PD    | glucose-6-phosphate dehydrogenase                        | <b>0.0001</b>    | -0.1379           | 0.1634           | -0.1570           | 0.0760        | 233 ± 17    | 289 ± 23    | 355 ± 31    | 309 ± 57    |
| 203853_s_at | GAB2    | GRB2-associated binding protein 2                        | <b>0.0202</b>    | -0.2032           | 0.0723           | -0.4535           | 0.4749        | 1281 ± 77   | 1465 ± 172  | 1393 ± 72   | 1660 ± 308  |
| 220886_at   | GABRQ   | gamma-aminobutyric acid receptor, theta                  | 0.1085           | <b>-0.0081</b>    | <b>0.0039</b>    | <b>-0.0035</b>    | <b>0.0053</b> | 98 ± 11     | 188 ± 27    | 155 ± 13    | 205 ± 29    |
| 209304_x_at | GADD45B | growth arrest and DNA-damage-inducible, beta             | 0.4308           | <b>-0.0124</b>    | -0.2865          | -0.2601           | 0.1684        | 200 ± 83    | 252 ± 88    | 251 ± 57    | 529 ± 174   |
| 207574_s_at | GADD45B | growth arrest and DNA-damage-inducible, beta             | 0.6976           | <b>-0.0411</b>    | -0.1461          | 0.4709            | 0.1877        | 826 ± 194   | 569 ± 82    | 1189 ± 215  | 1206 ± 309  |
| 204121_at   | GADD45G | growth arrest and DNA-damage-inducible, gamma            | <b>0.0529</b>    | <b>-0.0019</b>    | -0.2213          | 0.3086            | <b>0.0079</b> | 135 ± 17    | 140 ± 34    | 178 ± 18    | 256 ± 31    |
| 207086_x_at | GAGE4   | G antigen 4                                              | <b>0.0403</b>    | -0.0749           | 0.2067           | -0.3665           | <b>0.0374</b> | 118 ± 14    | 138 ± 16    | 119 ± 9     | 213 ± 48    |
| 208155_x_at | GAGE6   | G antigen 6                                              | <b>0.0492</b>    | <b>-0.0148</b>    | 0.2833           | 0.2955            | <b>0.0531</b> | 126 ± 10    | 127 ± 19    | 169 ± 12    | 181 ± 25    |
| 40225_at    | GAK     | cyclin G associated kinase                               | <b>0.0110</b>    | <b>-0.0547</b>    | 0.4185           | 0.2943            | 0.0997        | 1839 ± 167  | 1896 ± 349  | 1959 ± 92   | 2761 ± 433  |
| 202281_at   | GAK     | cyclin G associated kinase                               | <b>0.0158</b>    | -0.1064           | -0.3730          | 0.2430            | 0.3096        | 547 ± 52    | 491 ± 102   | 643 ± 53    | 709 ± 129   |
| 201723_s_at | GALNT1  | UDP-N-acetyl-alpha-D-galactosamine 1                     | 0.3002           | <b>-0.0336</b>    | 0.4142           | -0.1813           | 0.1038        | 512 ± 23    | 533 ± 16    | 585 ± 26    | 600 ± 43    |
| 219956_at   | GALNT6  | UDP-N-acetyl-alpha-D-galactosamine 6                     | 0.5226           | <b>-0.0081</b>    | -0.2252          | -0.3535           | 0.0998        | 316 ± 33    | 323 ± 28    | 361 ± 80    | 539 ± 87    |
| 220929_at   | GALNT8  | UDP-N-acetyl-alpha-D-galactosamine: 8                    | <b>0.0011</b>    | -0.0598           | -0.2898          | 0.3891            | 0.2407        | 132 ± 12    | 144 ± 9     | 163 ± 20    | 192 ± 37    |
| 205354_at   | GAMT    | guanidinoacetate N-methyltransferase                     | <b>0.0054</b>    | -0.0940           | <b>0.0021</b>    | -0.1239           | 0.1569        | 317 ± 31    | 370 ± 30    | 364 ± 43    | 478 ± 80    |
| 204028_s_at | GAPCENA | rab6 GTPase activating protein                           | <b>0.0039</b>    | <b>-0.0231</b>    | 0.1198           | -0.3690           | <b>0.0537</b> | 1472 ± 78   | 1620 ± 85   | 1747 ± 129  | 1902 ± 121  |
| 208138_at   | GAS     | gastrin                                                  | 0.6262           | <b>-0.0311</b>    | 0.1528           | -0.1679           | 0.0704        | 223 ± 24    | 270 ± 29    | 240 ± 22    | 327 ± 37    |
| 204457_s_at | GAS1    | growth arrest-specific 1                                 | <b>0.0047</b>    | <b>-0.0060</b>    | -0.1530          | -0.2460           | 0.0807        | 331 ± 37    | 349 ± 63    | 390 ± 66    | 526 ± 51    |
| 31874_at    | GAS2L1  | growth arrest-specific 2 like 1                          | 0.2561           | <b>-0.0327</b>    | 0.4090           | 0.2762            | 0.1216        | 1999 ± 167  | 2135 ± 280  | 2363 ± 166  | 3051 ± 551  |
| 202270_at   | GBP1    | guanylate binding protein 1, interferon-inducible, 67kDa | 0.4795           | <b>-0.0005</b>    | 0.4933           | <b>-0.0312</b>    | <b>0.0459</b> | 84 ± 17     | 90 ± 16     | 154 ± 26    | 164 ± 33    |
| 202269_x_at | GBP1    | guanylate binding protein 1, interferon-inducible, 67kDa | 0.0872           | <b>-0.0160</b>    | -0.2118          | -0.2896           | 0.1216        | 123 ± 26    | 108 ± 10    | 200 ± 42    | 186 ± 34    |
| 202748_at   | GBP2    | guanylate binding protein 2, interferon-inducible        | 0.0695           | <b>-0.0181</b>    | 0.4744           | -0.3312           | 0.0969        | 261 ± 48    | 207 ± 28    | 288 ± 38    | 375 ± 48    |
| 218912_at   | GCC1    | golgi coiled coil 1                                      | 0.2364           | <b>-0.0155</b>    | -0.4072          | 0.3610            | 0.1502        | 397 ± 33    | 383 ± 12    | 466 ± 33    | 479 ± 44    |

| Probe set   | Name    | Description                                                     | NFT <sub>0</sub> | MMSE <sub>0</sub> | NFT <sub>1</sub> | MMSE <sub>1</sub> | ANOVA         | Control     | Incipient   | Moderate    | Severe      |
|-------------|---------|-----------------------------------------------------------------|------------------|-------------------|------------------|-------------------|---------------|-------------|-------------|-------------|-------------|
| 202923_s_at | GCLC    | glutamate-cysteine ligase, catalytic subunit                    | 0.3378           | <b>-0.0329</b>    | -0.3315          | -0.3267           | 0.3079        | 721 ± 30    | 772 ± 84    | 786 ± 79    | 890 ± 51    |
| 206397_x_at | GDF1    | growth differentiation factor 1                                 | <b>0.0007</b>    | <b>-0.0021</b>    | <b>0.0047</b>    | 0.1810            | <b>0.0013</b> | 3388 ± 448  | 3988 ± 621  | 4835 ± 615  | 9008 ± 1706 |
| 221314_at   | GDF9    | growth differentiation factor 9                                 | 0.2946           | <b>-0.0145</b>    | 0.0757           | -0.2874           | 0.0774        | 188 ± 17    | 194 ± 17    | 208 ± 19    | 265 ± 29    |
| 204472_at   | GEM     | GTP binding protein overexpressed in skeletal muscle            | 0.3951           | <b>-0.0200</b>    | <b>-0.0220</b>   | -0.3777           | 0.1794        | 528 ± 93    | 462 ± 42    | 558 ± 82    | 775 ± 150   |
| 203540_at   | GFAP    | glial fibrillary acidic protein                                 | <b>0.0007</b>    | <b>-0.0047</b>    | 0.2849           | -0.3598           | <b>0.0028</b> | 9575 ± 2303 | 2303 ± 2309 | 1655 ± 3370 | 1436 ± 3898 |
| 205100_at   | GFPT2   | glutamine-fructose-6-phosphate transaminase 2                   | <b>0.0024</b>    | <b>-0.0031</b>    | -0.1919          | -0.2648           | <b>0.0390</b> | 473 ± 53    | 509 ± 63    | 534 ± 37    | 735 ± 100   |
| 210260_s_at | GG2-1   | TNF-induced protein                                             | 0.2697           | <b>-0.0056</b>    | 0.1440           | -0.1486           | <b>0.0337</b> | 89 ± 9      | 87 ± 14     | 82 ± 9      | 132 ± 16    |
| 208296_x_at | GG2-1   | TNF-induced protein                                             | <b>0.0052</b>    | <b>-0.0010</b>    | -0.1026          | -0.3941           | <b>0.0051</b> | 137 ± 17    | 114 ± 10    | 176 ± 13    | 205 ± 24    |
| 50277_at    | GGA1    | golgi assoc., gamma adaptin ear cont., ARF binding 1            | <b>0.0087</b>    | <b>-0.0094</b>    | 0.1813           | 0.2164            | <b>0.0065</b> | 2115 ± 127  | 2236 ± 261  | 2197 ± 145  | 3273 ± 392  |
| 45572_s_at  | GGA1    | golgi assoc., gamma adaptin ear cont., ARF binding 1            | <b>0.0079</b>    | <b>-0.0332</b>    | 0.1441           | 0.1918            | <b>0.0153</b> | 2083 ± 124  | 2157 ± 175  | 2082 ± 142  | 2916 ± 319  |
| 214233_at   | GGA2    | golgi assoc., gamma adaptin ear cont., ARF binding 2            | 0.2847           | <b>-0.0221</b>    | 0.3788           | -0.4479           | <b>0.0146</b> | 201 ± 28    | 234 ± 14    | 188 ± 23    | 336 ± 50    |
| 202321_at   | GGPS1   | geranylgeranyl diphosphate synthase 1                           | 0.0578           | <b>-0.0398</b>    | 0.1741           | 0.4364            | 0.2752        | 283 ± 21    | 262 ± 8     | 295 ± 27    | 330 ± 25    |
| 207131_x_at | GGT1    | gamma-glutamyltransferase 1                                     | <b>0.0498</b>    | -0.5682           | 0.3518           | -0.3872           | 0.6655        | 228 ± 15    | 251 ± 32    | 242 ± 12    | 281 ± 57    |
| 219571_s_at | GIOT-3  | GIOT-3 for gonadotropin inducible transcription repressor-3     | <b>0.0101</b>    | <b>-0.0263</b>    | 0.4362           | 0.4414            | <b>0.0373</b> | 385 ± 21    | 402 ± 20    | 479 ± 32    | 451 ± 22    |
| 201667_at   | GJA1    | gap junction protein, alpha 1, 43kDa                            | <b>0.0088</b>    | <b>-0.0029</b>    | 0.2614           | <b>-0.0394</b>    | <b>0.0066</b> | 8527 ± 616  | 9294 ± 933  | 145 ± 1106  | 1958 ± 1320 |
| 204973_at   | GJB1    | gap junction protein, beta 1, 32kDa                             | 0.5627           | <b>-0.0024</b>    | -0.3942          | -0.1613           | 0.0559        | 259 ± 33    | 245 ± 32    | 338 ± 31    | 414 ± 74    |
| 207034_s_at | GLI2    | GLI-Kruppel family member GLI2                                  | <b>0.0394</b>    | <b>-0.0313</b>    | <b>0.0002</b>    | <b>-0.0537</b>    | <b>0.0125</b> | 53 ± 6      | 94 ± 16     | 93 ± 8      | 96 ± 9      |
| 208240_s_at | GLIO703 | acid fibroblast growth factor-like protein                      | <b>0.0193</b>    | -0.4557           | 0.1676           | -0.2935           | 0.4785        | 436 ± 71    | 591 ± 110   | 626 ± 85    | 608 ± 137   |
| 216021_s_at | GLRA3   | glycine receptor, alpha 3                                       | 0.2047           | <b>-0.0032</b>    | -0.1144          | -0.2517           | <b>0.0145</b> | 69 ± 19     | 53 ± 12     | 67 ± 12     | 134 ± 22    |
| 217807_s_at | GLTSCR2 | glioma tumor suppressor candidate region gene 2                 | 0.0973           | <b>-0.0335</b>    | 0.0961           | 0.3195            | 0.0610        | 5524 ± 762  | 6032 ± 1154 | 5937 ± 422  | 9236 ± 1566 |
| 222251_s_at | GMEB2   | glucocorticoid modulatory element binding protein 2             | <b>0.0036</b>    | <b>-0.0040</b>    | <b>-0.0161</b>   | 0.0936            | <b>0.0060</b> | 456 ± 17    | 447 ± 57    | 510 ± 45    | 748 ± 102   |
| 44146_at    | GMEB2   | glucocorticoid modulatory element binding protein 2             | <b>0.0193</b>    | <b>-0.0230</b>    | 0.1818           | -0.4741           | 0.1046        | 942 ± 47    | 984 ± 95    | 1064 ± 58   | 1255 ± 154  |
| 202543_s_at | GMFB    | glia maturation factor, beta                                    | <b>0.0300</b>    | -0.2118           | 0.4027           | -0.4285           | <b>0.0298</b> | 258 ± 26    | 283 ± 36    | 436 ± 57    | 312 ± 50    |
| 218350_s_at | GMNN    | geminin, DNA replication inhibitor                              | 0.1277           | <b>-0.0353</b>    | -0.4888          | -0.3441           | 0.2385        | 557 ± 48    | 531 ± 44    | 677 ± 69    | 691 ± 92    |
| 204187_at   | GMPR    | guanosine monophosphate reductase                               | <b>0.0020</b>    | <b>-0.0003</b>    | -0.2771          | <b>-0.0474</b>    | <b>0.0068</b> | 302 ± 34    | 346 ± 63    | 558 ± 102   | 663 ± 97    |
| 214431_at   | GMPS    | guanine monophosphate synthetase                                | <b>0.0463</b>    | -0.3648           | 0.1747           | 0.3103            | 0.5494        | 224 ± 24    | 224 ± 8     | 265 ± 28    | 265 ± 40    |
| 221737_at   | GNA12   | guanine nucleotide binding protein alpha 12                     | <b>0.0009</b>    | <b>-0.0057</b>    | 0.1159           | 0.3704            | <b>0.0240</b> | 683 ± 54    | 714 ± 119   | 949 ± 83    | 1050 ± 119  |
| 201180_s_at | GNAI3   | guanine nucleotide binding protein, alpha inhibiting activity 3 | 0.1123           | <b>-0.0083</b>    | 0.3466           | <b>-0.0228</b>    | 0.0947        | 946 ± 113   | 1147 ± 112  | 1067 ± 82   | 1310 ± 81   |
| 204993_at   | GNAZ    | guanine nucleotide binding protein, alpha z polypeptide         | <b>0.0099</b>    | <b>-0.0145</b>    | <b>0.0088</b>    | -0.0983           | <b>0.0075</b> | 943 ± 54    | 1089 ± 18   | 1052 ± 71   | 1320 ± 104  |
| 203383_s_at | GOLGA1  | golgi autoantigen, golgin subfamily a, 1                        | 0.2846           | <b>-0.0406</b>    | <b>-0.0077</b>   | 0.1321            | <b>0.0387</b> | 562 ± 48    | 476 ± 28    | 527 ± 40    | 673 ± 55    |
| 202106_at   | GOLGA3  | golgi autoantigen, golgin subfamily a, 3                        | <b>0.0078</b>    | -0.1783           | 0.1386           | -0.3005           | 0.4777        | 578 ± 32    | 640 ± 43    | 632 ± 57    | 698 ± 81    |
| 201567_s_at | GOLGA4  | golgi autoantigen, golgin subfamily a, 4                        | 0.5147           | <b>-0.0185</b>    | 0.4713           | <b>-0.0085</b>    | 0.2212        | 740 ± 42    | 859 ± 75    | 879 ± 78    | 934 ± 62    |
| 201056_at   | GOLGB1  | golgi autoantigen, golgin subfamily b, macrogolgin, 1           | <b>0.0162</b>    | -0.1767           | 0.4898           | -0.4079           | 0.3962        | 591 ± 38    | 653 ± 70    | 653 ± 42    | 730 ± 79    |
| 204324_s_at | GOLPH4  | golgi phosphoprotein 4                                          | <b>0.0002</b>    | -0.0585           | 0.0616           | 0.3239            | 0.1384        | 194 ± 24    | 176 ± 18    | 283 ± 35    | 308 ± 77    |
| 204630_s_at | GOSR1   | golgi SNAP receptor complex member 1                            | <b>0.0004</b>    | -0.0829           | 0.1248           | -0.0587           | 0.2339        | 1205 ± 69   | 1251 ± 38   | 1597 ± 206  | 1693 ± 345  |
| 213206_at   | GOSR2   | golgi SNAP receptor complex member 2                            | <b>0.0171</b>    | -0.2925           | 0.3581           | <b>-0.0243</b>    | 0.1655        | 82 ± 14     | 96 ± 16     | 139 ± 13    | 122 ± 31    |
| 213180_s_at | GOSR2   | golgi SNAP receptor complex member 2                            | 0.1599           | <b>-0.0367</b>    | -0.1493          | -0.4145           | <b>0.0150</b> | 222 ± 12    | 182 ± 20    | 205 ± 18    | 265 ± 16    |
| 222058_at   | GP      | goliath protein                                                 | <b>0.0234</b>    | <b>-0.0021</b>    | -0.2028          | -0.3028           | <b>0.0280</b> | 364 ± 41    | 402 ± 38    | 410 ± 46    | 554 ± 48    |
| 204984_at   | GPC4    | glypican 4                                                      | 0.1666           | <b>-0.0028</b>    | 0.3112           | -0.2522           | <b>0.0219</b> | 252 ± 27    | 306 ± 38    | 333 ± 41    | 415 ± 33    |
| 209167_at   | GPM6B   | glycoprotein M6B                                                | 0.2911           | <b>-0.0011</b>    | 0.4608           | -0.1684           | <b>0.0395</b> | 5522 ± 1053 | 15349 ± 337 | 18872 ± 810 | 9279 ± 1859 |
| 209170_s_at | GPM6B   | glycoprotein M6B                                                | 0.5022           | <b>-0.0203</b>    | -0.2370          | -0.1752           | 0.2397        | 16565 ± 956 | 5441 ± 1640 | 1620 ± 1469 | 9438 ± 1756 |
| 214605_x_at | GPR1    | G protein-coupled receptor 1                                    | <b>0.0121</b>    | -0.1013           | -0.1805          | 0.1836            | 0.1079        | 99 ± 16     | 66 ± 18     | 111 ± 18    | 168 ± 50    |



| Probe set   | Name    | Description                                                    | NFT <sub>0</sub> | MMSE <sub>0</sub> | NFT <sub>1</sub> | MMSE <sub>1</sub> | ANOVA         | Control    | Incipient   | Moderate    | Severe      |
|-------------|---------|----------------------------------------------------------------|------------------|-------------------|------------------|-------------------|---------------|------------|-------------|-------------|-------------|
| 211977_at   | GPR107  | G protein-coupled receptor 107                                 | 0.1652           | <b>-0.0414</b>    | <b>0.0094</b>    | -0.4349           | 0.0648        | 280 ± 16   | 355 ± 44    | 305 ± 22    | 424 ± 61    |
| 220565_at   | GPR2    | G protein-coupled receptor 2                                   | 0.0626           | <b>-0.0228</b>    | -0.4947          | 0.1235            | <b>0.0097</b> | 137 ± 13   | 123 ± 21    | 135 ± 15    | 229 ± 36    |
| 206960_at   | GPR23   | G protein-coupled receptor 23                                  | <b>0.0237</b>    | -0.5581           | <b>0.0386</b>    | <b>-0.0143</b>    | 0.2369        | 61 ± 9     | 86 ± 17     | 97 ± 12     | 76 ± 12     |
| 206236_at   | GPR4    | G protein-coupled receptor 4                                   | 0.1179           | <b>-0.0222</b>    | 0.1394           | -0.3591           | 0.0902        | 131 ± 15   | 166 ± 34    | 164 ± 19    | 221 ± 29    |
| 206361_at   | GPR44   | G protein-coupled receptor 44                                  | 0.0688           | <b>-0.0232</b>    | 0.2274           | <b>-0.0518</b>    | <b>0.0404</b> | 158 ± 15   | 193 ± 28    | 161 ± 19    | 261 ± 44    |
| 213880_at   | GPR49   | G protein-coupled receptor 49                                  | -0.9964          | <b>-0.0292</b>    | -0.4843          | -0.3200           | 0.3585        | 310 ± 22   | 269 ± 26    | 391 ± 74    | 392 ± 71    |
| 212070_at   | GPR56   | G protein-coupled receptor 56                                  | <b>0.0227</b>    | <b>-0.0076</b>    | 0.0824           | -0.2145           | 0.0914        | 2205 ± 241 | 2498 ± 267  | 2691 ± 85   | 2995 ± 154  |
| 206002_at   | GPR64   | G protein-coupled receptor 64                                  | 0.4096           | <b>-0.0444</b>    | -0.1669          | -0.2039           | 0.1291        | 94 ± 12    | 112 ± 16    | 134 ± 17    | 138 ± 9     |
| 214467_at   | GPR65   | G protein-coupled receptor 65                                  | 0.0978           | <b>-0.0058</b>    | 0.2720           | <b>-0.0545</b>    | 0.0601        | 65 ± 8     | 92 ± 12     | 119 ± 23    | 126 ± 19    |
| 203632_s_at | GPRC5B  | G protein-coupled receptor, family C, group 5, member B        | 0.5907           | <b>-0.0031</b>    | -0.1174          | -0.2951           | 0.0812        | 9378 ± 775 | 10323 ± 997 | 10702 ± 893 | 2968 ± 1198 |
| 204396_s_at | GPRK5   | G protein-coupled receptor kinase 5                            | <b>0.0191</b>    | -0.0629           | 0.3653           | -0.2351           | 0.1079        | 260 ± 18   | 296 ± 30    | 292 ± 23    | 357 ± 35    |
| 210981_s_at | GPRK6   | G protein-coupled receptor kinase 6                            | <b>0.0252</b>    | -0.3525           | -0.4139          | -0.3627           | 0.3867        | 253 ± 32   | 306 ± 45    | 340 ± 45    | 327 ± 36    |
| 214091_s_at | GPX3    | glutathione peroxidase 3                                       | 0.0722           | <b>-0.0468</b>    | -0.4047          | 0.1236            | 0.1524        | 487 ± 69   | 402 ± 27    | 536 ± 54    | 999 ± 377   |
| 205068_s_at | GRAF    | GTPase regulator assoc. with focal adhesion kinase pp125       | <b>0.0153</b>    | <b>-0.0480</b>    | -0.2873          | -0.4590           | 0.1240        | 363 ± 18   | 347 ± 20    | 358 ± 35    | 448 ± 44    |
| 210999_s_at | GRB10   | growth factor receptor-bound protein 10                        | <b>0.0198</b>    | <b>-0.0152</b>    | <b>-0.0308</b>   | 0.3708            | <b>0.0133</b> | 195 ± 25   | 149 ± 18    | 204 ± 20    | 329 ± 62    |
| 212244_at   | GRINL1A | glutamate receptor, ionotropic, N-methyl D-aspartate-like 1A   | 0.1961           | <b>-0.0272</b>    | -0.2613          | -0.1004           | 0.3773        | 735 ± 71   | 761 ± 78    | 834 ± 76    | 901 ± 26    |
| 208035_at   | GRM6    | glutamate receptor, metabotropic 6                             | 0.1456           | <b>-0.0001</b>    | 0.2317           | <b>-0.0015</b>    | <b>0.0001</b> | 281 ± 17   | 306 ± 24    | 286 ± 29    | 492 ± 46    |
| 205801_s_at | GRP3    | guanine nucleotide exchange factor for Rap1                    | 0.1063           | <b>-0.0016</b>    | 0.3245           | 0.4359            | <b>0.0067</b> | 263 ± 33   | 223 ± 36    | 493 ± 94    | 494 ± 64    |
| 209945_s_at | GSK3B   | glycogen synthase kinase 3 beta                                | <b>0.0279</b>    | -0.0703           | 0.1326           | <b>-0.0481</b>    | <b>0.0448</b> | 419 ± 24   | 548 ± 55    | 559 ± 18    | 616 ± 77    |
| 210912_x_at | GSTM4   | glutathione S-transferase M4                                   | 0.1168           | <b>-0.0165</b>    | 0.4771           | -0.0925           | <b>0.0192</b> | 474 ± 30   | 511 ± 45    | 462 ± 17    | 591 ± 12    |
| 205752_s_at | GSTM5   | glutathione S-transferase M5                                   | <b>0.0035</b>    | <b>-0.0005</b>    | 0.4310           | -0.4405           | <b>0.0088</b> | 1039 ± 164 | 997 ± 93    | 1324 ± 157  | 1926 ± 287  |
| 205439_at   | GSTT2   | glutathione S-transferase theta 2                              | 0.0609           | <b>-0.0499</b>    | -0.2853          | -0.3129           | 0.1187        | 107 ± 16   | 147 ± 30    | 133 ± 29    | 195 ± 23    |
| 202451_at   | GTF2H1  | general transcription factor IIH, polypeptide 1, 62kDa         | 0.0620           | <b>-0.0457</b>    | <b>0.0252</b>    | -0.1414           | <b>0.0349</b> | 653 ± 49   | 743 ± 56    | 894 ± 63    | 815 ± 59    |
| 222104_x_at | GTF2H3  | general transcription factor IIH, polypeptide 3, 34kDa         | <b>0.0188</b>    | <b>-0.0183</b>    | <b>0.0120</b>    | -0.1941           | <b>0.0192</b> | 267 ± 26   | 447 ± 70    | 546 ± 75    | 523 ± 79    |
| 210892_s_at | GTF2I   | general transcription factor II, i                             | <b>0.0414</b>    | -0.2977           | 0.0907           | 0.0999            | 0.5006        | 97 ± 14    | 95 ± 13     | 97 ± 12     | 123 ± 16    |
| 210891_s_at | GTF2I   | general transcription factor II, i                             | 0.2744           | <b>-0.0106</b>    | 0.4968           | <b>-0.0119</b>    | 0.0945        | 7358 ± 359 | 7783 ± 546  | 8911 ± 158  | 8478 ± 660  |
| 35671_at    | GTF3C1  | general transcription factor IIIC, polypeptide 1, alpha 220kDa | <b>0.0086</b>    | -0.2387           | -0.2871          | 0.1669            | 0.2613        | 1670 ± 76  | 1675 ± 150  | 2015 ± 130  | 2016 ± 274  |
| 204366_s_at | GTF3C2  | general transcription factor IIIC, polypeptide 2, beta 110kDa  | 0.2079           | <b>-0.0237</b>    | 0.2826           | -0.2680           | <b>0.0363</b> | 902 ± 49   | 983 ± 106   | 856 ± 43    | 1247 ± 162  |
| 213835_x_at | GTPBG3  | mitochondrial GTP binding protein                              | <b>0.0418</b>    | -0.1445           | 0.0926           | -0.2526           | 0.3571        | 493 ± 36   | 569 ± 63    | 572 ± 50    | 634 ± 76    |
| 218088_s_at | GTR2    | Rag C protein                                                  | <b>0.0001</b>    | <b>-0.0002</b>    | -0.4090          | 0.2745            | <b>0.0007</b> | 1041 ± 36  | 1013 ± 82   | 1218 ± 67   | 1411 ± 69   |
| 211040_x_at | GTSE1   | G-2 and S-phase expressed 1                                    | 0.3915           | <b>-0.0119</b>    | -0.1952          | -0.1168           | 0.2177        | 848 ± 64   | 867 ± 25    | 926 ± 51    | 1045 ± 102  |
| 202605_at   | GUSB    | glucuronidase, beta                                            | <b>0.0180</b>    | -0.2020           | -0.3251          | 0.4929            | 0.4342        | 628 ± 68   | 704 ± 87    | 685 ± 28    | 873 ± 195   |
| 215695_s_at | GYG2    | glycogenin 2                                                   | <b>0.0496</b>    | <b>-0.0128</b>    | 0.1616           | -0.0860           | 0.1524        | 155 ± 25   | 150 ± 29    | 198 ± 25    | 227 ± 24    |
| 216833_x_at | GYPB    | glycophorin B                                                  | 0.3405           | <b>-0.0236</b>    | 0.0623           | -0.1498           | 0.1241        | 133 ± 20   | 124 ± 17    | 165 ± 14    | 190 ± 27    |
| 215093_at   | H105E3  | NAD dependent steroid dehydrogenase-like; H105e3               | <b>0.0019</b>    | <b>-0.0135</b>    | 0.2719           | <b>-0.0205</b>    | <b>0.0545</b> | 187 ± 12   | 219 ± 14    | 229 ± 11    | 258 ± 28    |
| 221667_s_at | H11     | protein kinase H11                                             | <b>0.0325</b>    | <b>-0.0110</b>    | -0.2135          | -0.1292           | 0.2250        | 3080 ± 407 | 3136 ± 396  | 3949 ± 579  | 4552 ± 813  |
| 209398_at   | H1F2    | H1 histone family, member 2                                    | <b>0.0025</b>    | <b>0.0000</b>     | -0.4224          | -0.1851           | <b>0.0012</b> | 200 ± 21   | 197 ± 19    | 292 ± 20    | 424 ± 74    |
| 204805_s_at | H1FX    | H1 histone family, member X                                    | 0.3343           | <b>-0.0103</b>    | 0.2358           | 0.1958            | <b>0.0086</b> | 802 ± 157  | 717 ± 47    | 750 ± 37    | 1503 ± 271  |
| 220936_s_at | H2AFJ   | H2A histone family, member J                                   | 0.0934           | <b>-0.0112</b>    | 0.4641           | <b>-0.0283</b>    | <b>0.0453</b> | 95 ± 12    | 100 ± 17    | 91 ± 12     | 145 ± 16    |
| 214290_s_at | H2AFO   | H2A histone family, member O                                   | 0.1840           | <b>-0.0258</b>    | -0.3274          | 0.2912            | <b>0.0236</b> | 626 ± 55   | 566 ± 63    | 448 ± 71    | 911 ± 173   |
| 218280_x_at | H2AFO   | H2A histone family, member O                                   | <b>0.0516</b>    | <b>-0.0376</b>    | <b>-0.0310</b>   | 0.1351            | <b>0.0355</b> | 336 ± 21   | 281 ± 25    | 254 ± 30    | 449 ± 86    |
| 205436_s_at | H2AFX   | H2A histone family, member X                                   | 0.1529           | <b>-0.0294</b>    | 0.2264           | 0.1686            | <b>0.0226</b> | 1393 ± 98  | 1471 ± 142  | 1372 ± 81   | 1995 ± 252  |

| Probe set   | Name     | Description                                             | NFT <sub>0</sub> | MMSE <sub>0</sub> | NFT <sub>1</sub> | MMSE <sub>1</sub> | ANOVA         | Control    | Incipient  | Moderate   | Severe      |
|-------------|----------|---------------------------------------------------------|------------------|-------------------|------------------|-------------------|---------------|------------|------------|------------|-------------|
| 212205_at   | H2AV     | histone H2A.F/Z variant                                 | <b>0.0383</b>    | -0.1289           | 0.1438           | <b>-0.0485</b>    | <b>0.0417</b> | 3246 ± 90  | 3551 ± 178 | 4050 ± 157 | 3704 ± 314  |
| 222067_x_at | H2BFB    | H2B histone family, member B                            | 0.1840           | <b>-0.0138</b>    | <b>-0.0056</b>   | <b>0.0508</b>     | <b>0.0319</b> | 232 ± 18   | 192 ± 18   | 197 ± 35   | 359 ± 74    |
| 209911_x_at | H2BFB    | H2B histone family, member B                            | 0.1416           | <b>-0.0143</b>    | -0.1819          | 0.2089            | 0.0617        | 584 ± 53   | 509 ± 37   | 608 ± 63   | 783 ± 103   |
| 202708_s_at | H2BFQ    | H2B histone family, member Q                            | 0.2363           | <b>-0.0142</b>    | -0.1293          | 0.0613            | 0.0888        | 898 ± 127  | 681 ± 39   | 867 ± 86   | 1271 ± 256  |
| 213828_x_at | H3F3A    | H3 histone, family 3A                                   | -0.7117          | <b>-0.0295</b>    | -0.0908          | 0.2397            | 0.1105        | 7795 ± 500 | 6487 ± 387 | 7403 ± 384 | 9931 ± 1756 |
| 211940_x_at | H3F3A    | H3 histone, family 3A                                   | 0.9045           | <b>-0.0299</b>    | -0.1043          | 0.3697            | <b>0.0458</b> | 5312 ± 467 | 4361 ± 327 | 4678 ± 194 | 6807 ± 1017 |
| 211998_at   | H3F3B    | H3 histone, family 3B                                   | <b>0.0179</b>    | <b>-0.0191</b>    | <b>0.0119</b>    | -0.3470           | <b>0.0432</b> | 1123 ± 66  | 1487 ± 171 | 1755 ± 138 | 1810 ± 328  |
| 208180_s_at | H4FH     | H4 histone family, member H                             | <b>0.0408</b>    | -0.3376           | 0.1906           | 0.2131            | 0.2174        | 82 ± 4     | 88 ± 14    | 83 ± 8     | 115 ± 18    |
| 208181_at   | H4FH     | H4 histone family, member H                             | <b>0.0170</b>    | <b>-0.0073</b>    | 0.3022           | 0.1819            | <b>0.0110</b> | 35 ± 7     | 28 ± 6     | 39 ± 11    | 80 ± 16     |
| 208630_at   | HADHA    | hydroxyacyl-Coenzyme A dehydrogenase, alpha subunit     | <b>0.0118</b>    | <b>-0.0521</b>    | 0.4725           | 0.2224            | 0.0996        | 688 ± 47   | 605 ± 39   | 803 ± 76   | 853 ± 99    |
| 221744_at   | HAN11    | WD-repeat protein                                       | <b>0.0483</b>    | -0.3463           | 0.1168           | -0.2447           | 0.4583        | 289 ± 29   | 328 ± 36   | 358 ± 22   | 350 ± 49    |
| 221745_at   | HAN11    | WD-repeat protein                                       | 0.3014           | <b>-0.0207</b>    | 0.2287           | -0.1814           | 0.2937        | 353 ± 43   | 329 ± 12   | 415 ± 27   | 452 ± 79    |
| 220801_s_at | HAO2     | hydroxyacid oxidase 2                                   | 0.1094           | <b>-0.0016</b>    | <b>0.0467</b>    | <b>-0.0357</b>    | <b>0.0027</b> | 145 ± 12   | 200 ± 20   | 176 ± 20   | 288 ± 42    |
| 209102_s_at | HBP1     | HMG-box containing protein 1                            | <b>0.0491</b>    | <b>-0.0149</b>    | -0.0662          | -0.2922           | 0.1785        | 862 ± 68   | 836 ± 71   | 1029 ± 104 | 1062 ± 94   |
| 218166_s_at | HBXAP    | hepatitis B virus x associated protein                  | <b>0.0084</b>    | <b>-0.0001</b>    | -0.3952          | -0.0954           | <b>0.0067</b> | 182 ± 15   | 170 ± 17   | 219 ± 12   | 251 ± 19    |
| 218662_s_at | HCAP-G   | chromosome condensation protein G                       | 0.2099           | <b>-0.0134</b>    | <b>0.0298</b>    | -0.2702           | 0.0556        | 53 ± 6     | 80 ± 13    | 68 ± 17    | 107 ± 17    |
| 216229_x_at | HCGII-7  | HCGII-7 protein                                         | 0.1128           | <b>-0.0199</b>    | 0.2201           | -0.1481           | 0.1208        | 468 ± 49   | 475 ± 56   | 589 ± 57   | 672 ± 92    |
| 217965_s_at | HCNGP    | transcriptional regulator protein                       | <b>0.0073</b>    | <b>-0.0217</b>    | <b>0.0403</b>    | -0.4671           | <b>0.0494</b> | 306 ± 15   | 374 ± 52   | 394 ± 48   | 526 ± 88    |
| 42361_g_at  | HCR      | HCR                                                     | <b>0.0006</b>    | -0.1657           | 0.2218           | -0.4724           | 0.3324        | 98 ± 9     | 113 ± 15   | 117 ± 16   | 143 ± 26    |
| 201209_at   | HDAC1    | histone deacetylase 1                                   | <b>0.0383</b>    | <b>-0.0168</b>    | 0.2007           | -0.1396           | <b>0.0366</b> | 487 ± 57   | 591 ± 78   | 749 ± 66   | 680 ± 61    |
| 204225_at   | HDAC4    | histone deacetylase 4                                   | 0.1689           | <b>-0.0037</b>    | -0.2977          | 0.2746            | <b>0.0177</b> | 444 ± 34   | 410 ± 20   | 484 ± 34   | 579 ± 42    |
| 217937_s_at | HDAC7A   | histone deacetylase 7A                                  | <b>0.0145</b>    | -0.1376           | 0.1337           | -0.3190           | 0.0779        | 169 ± 29   | 200 ± 42   | 306 ± 21   | 258 ± 56    |
| 212785_s_at | HDCMA18P | HDCMA18P protein                                        | 0.6277           | <b>-0.0403</b>    | 0.3208           | <b>-0.0189</b>    | 0.2753        | 437 ± 37   | 520 ± 45   | 520 ± 41   | 530 ± 30    |
| 200896_x_at | HDGF     | hepatoma-derived growth factor                          | 0.1432           | <b>-0.0302</b>    | <b>-0.0260</b>   | -0.4717           | 0.2466        | 1827 ± 135 | 1806 ± 54  | 1899 ± 78  | 2144 ± 185  |
| 203674_at   | HELZ     | helicase with zinc finger domain                        | <b>0.0327</b>    | -0.9466           | 0.4966           | 0.4583            | 0.4163        | 984 ± 56   | 1153 ± 118 | 1166 ± 53  | 1079 ± 124  |
| 203903_s_at | HEPH     | hephaestin                                              | <b>0.0097</b>    | <b>-0.0143</b>    | 0.4726           | -0.3213           | <b>0.0041</b> | 809 ± 59   | 802 ± 57   | 1139 ± 33  | 1007 ± 107  |
| 206087_x_at | HFE      | hemochromatosis                                         | <b>0.0204</b>    | -0.1680           | 0.0694           | 0.3967            | 0.1289        | 303 ± 22   | 380 ± 57   | 419 ± 14   | 415 ± 47    |
| 206910_x_at | HFL3     | H factor -like 3                                        | 0.1493           | <b>-0.0194</b>    | 0.0671           | -0.2142           | <b>0.0244</b> | 164 ± 20   | 200 ± 7    | 179 ± 15   | 242 ± 19    |
| 217130_at   | HFSE-1   | HFSE-1 protein                                          | <b>0.0252</b>    | -0.2062           | 0.4533           | 0.4596            | 0.3994        | 251 ± 24   | 263 ± 40   | 281 ± 32   | 334 ± 48    |
| 209960_at   | HGF      | hepatocyte growth factor                                | <b>0.0058</b>    | <b>-0.0061</b>    | 0.3819           | -0.1260           | <b>0.0037</b> | 61 ± 8     | 56 ± 12    | 106 ± 12   | 95 ± 9      |
| 38340_at    | HIP12    | huntingtin interacting protein 12                       | <b>0.0084</b>    | -0.1084           | 0.0666           | -0.3375           | 0.2182        | 2668 ± 169 | 3342 ± 376 | 3288 ± 204 | 4164 ± 977  |
| 209558_s_at | HIP12    | huntingtin interacting protein 12                       | <b>0.0017</b>    | <b>-0.0211</b>    | 0.1561           | 0.4829            | 0.0613        | 1415 ± 66  | 1747 ± 160 | 2174 ± 83  | 2530 ± 580  |
| 219028_at   | HIPK2    | homeodomain interacting protein kinase 2                | <b>0.0100</b>    | -0.0715           | 0.1187           | -0.2245           | 0.1298        | 801 ± 125  | 1247 ± 214 | 1548 ± 266 | 1356 ± 327  |
| 213537_at   | HLA-DPA1 | major histocompatibility complex, class II, DP alpha 1  | 0.1330           | <b>-0.0039</b>    | <b>0.0403</b>    | <b>-0.0453</b>    | <b>0.0316</b> | 115 ± 19   | 177 ± 30   | 218 ± 39   | 245 ± 31    |
| 209728_at   | HLA-DRB4 | major histocompatibility complex, class II, DR beta 4   | 0.5562           | <b>-0.0241</b>    | -0.4147          | -0.2074           | 0.1962        | 64 ± 31    | 255 ± 93   | 328 ± 126  | 365 ± 143   |
| 200904_at   | HLA-E    | major histocompatibility complex, class I, E            | <b>0.0412</b>    | <b>-0.0143</b>    | 0.2928           | -0.4695           | 0.0838        | 802 ± 84   | 838 ± 102  | 1191 ± 194 | 1169 ± 129  |
| 207565_s_at | HLALS    | major histocompatibility complex, class I-like sequence | <b>0.0540</b>    | <b>-0.0034</b>    | 0.1439           | <b>-0.0397</b>    | <b>0.0099</b> | 56 ± 8     | 64 ± 11    | 59 ± 12    | 112 ± 16    |
| 209399_at   | HLCS     | holocarboxylase synthetase [ ligase)                    | 0.3150           | <b>-0.0340</b>    | 0.1826           | -0.1758           | 0.1571        | 298 ± 20   | 296 ± 10   | 299 ± 22   | 369 ± 40    |
| 203040_s_at | HMBS     | hydroxymethylbilane synthase                            | 0.6340           | <b>-0.0112</b>    | -0.0965          | -0.4070           | 0.0658        | 380 ± 30   | 387 ± 36   | 363 ± 17   | 495 ± 56    |
| 219959_at   | HMCS     | molybdenum cofactor sulfurase                           | 0.9247           | <b>-0.0283</b>    | 0.2754           | 0.3527            | 0.1241        | 88 ± 14    | 76 ± 10    | 75 ± 8     | 134 ± 31    |
| 210719_s_at | HMG20B   | high-mobility group 20B                                 | 0.0729           | <b>-0.0051</b>    | 0.1253           | -0.2553           | <b>0.0067</b> | 267 ± 27   | 385 ± 36   | 344 ± 25   | 458 ± 50    |
| 203744_at   | HMGB3    | high-mobility group box 3                               | 0.1438           | <b>-0.0269</b>    | <b>0.0253</b>    | <b>-0.0227</b>    | 0.1632        | 568 ± 20   | 585 ± 30   | 642 ± 25   | 697 ± 79    |

| Probe set   | Name       | Description                                       | NFT <sub>0</sub> | MMSE <sub>0</sub> | NFT <sub>1</sub> | MMSE <sub>1</sub> | ANOVA         | Control     | Incipient   | Moderate    | Severe      |
|-------------|------------|---------------------------------------------------|------------------|-------------------|------------------|-------------------|---------------|-------------|-------------|-------------|-------------|
| 202772_at   | HMGCL      | 3-hydroxymethyl-3-methylglutaryl-Coenzyme A lyase | 0.0799           | <b>-0.0355</b>    | 0.1149           | 0.2023            | 0.1349        | 617 ± 24    | 641 ± 70    | 704 ± 38    | 793 ± 83    |
| 209377_s_at | HMGN3      | high mobility group nucleosomal binding domain 3  | 0.5215           | <b>-0.0142</b>    | <b>-0.0158</b>   | -0.1120           | <b>0.0340</b> | 3728 ± 155  | 3686 ± 480  | 4919 ± 422  | 4500 ± 209  |
| 203665_at   | HMOX1      | heme oxygenase 1                                  | 0.3369           | <b>-0.0480</b>    | -0.0964          | 0.4185            | 0.2454        | 542 ± 62    | 446 ± 13    | 518 ± 42    | 649 ± 100   |
| 212109_at   | HN1L       | HN1 like                                          | <b>0.0011</b>    | <b>-0.0131</b>    | -0.2089          | 0.1081            | <b>0.0259</b> | 211 ± 19    | 181 ± 17    | 268 ± 25    | 343 ± 68    |
| 214280_x_at | HNRPA1     | heterogeneous nuclear ribonucleoprotein A1        | <b>0.0088</b>    | <b>-0.0475</b>    | <b>-0.0056</b>   | -0.4787           | 0.1727        | 1718 ± 140  | 1554 ± 46   | 1834 ± 106  | 2140 ± 325  |
| 210110_x_at | HNRPH3     | heterogeneous nuclear ribonucleoprotein H3        | <b>0.0363</b>    | <b>-0.0458</b>    | -0.1545          | -0.1360           | 0.3048        | 383 ± 26    | 419 ± 49    | 417 ± 45    | 509 ± 69    |
| 200072_s_at | HNRPM      | heterogeneous nuclear ribonucleoprotein M         | 0.0839           | <b>-0.0330</b>    | 0.2808           | -0.0780           | 0.1649        | 874 ± 44    | 951 ± 123   | 975 ± 81    | 1197 ± 142  |
| 215489_x_at | HOMER-3    | Homer, neuronal immediate early gene, 3           | 0.1252           | <b>-0.0136</b>    | 0.2486           | 0.4751            | <b>0.0009</b> | 409 ± 31    | 452 ± 47    | 403 ± 18    | 710 ± 93    |
| 204647_at   | HOMER-3    | Homer, neuronal immediate early gene, 3           | <b>0.0285</b>    | <b>-0.0003</b>    | 0.2780           | -0.3614           | <b>0.0011</b> | 438 ± 54    | 492 ± 81    | 614 ± 32    | 879 ± 109   |
| 206848_at   | HOXA7      | homeo box A7                                      | 0.1568           | <b>-0.0235</b>    | 0.1134           | <b>-0.0550</b>    | 0.1396        | 235 ± 25    | 287 ± 30    | 329 ± 34    | 383 ± 81    |
| 205600_x_at | HOXB5      | homeo box B5                                      | <b>0.0237</b>    | -0.0572           | <b>0.0509</b>    | <b>-0.0233</b>    | 0.0765        | 277 ± 24    | 379 ± 36    | 342 ± 31    | 461 ± 85    |
| 206194_at   | HOXC4      | homeo box C4                                      | <b>0.0040</b>    | <b>-0.0004</b>    | <b>0.0495</b>    | <b>-0.0181</b>    | <b>0.0030</b> | 153 ± 14    | 189 ± 20    | 167 ± 18    | 295 ± 46    |
| 212259_s_at | HPIP       | hematopoietic PBX-interacting protein             | <b>0.0266</b>    | -0.1653           | 0.2625           | 0.4229            | 0.1652        | 507 ± 95    | 658 ± 136   | 950 ± 111   | 760 ± 225   |
| 214177_s_at | HPIP       | hematopoietic PBX-interacting protein             | <b>0.0008</b>    | <b>-0.0133</b>    | 0.0638           | -0.3815           | <b>0.0099</b> | 1382 ± 115  | 1987 ± 266  | 2668 ± 314  | 2541 ± 422  |
| 221170_at   | HRH4       | histamine H4 receptor                             | 0.4048           | <b>-0.0029</b>    | 0.4627           | 0.2943            | <b>0.0029</b> | 65 ± 4      | 63 ± 11     | 62 ± 7      | 126 ± 23    |
| 209972_s_at | HRI        | heme-regulated initiation factor 2-alpha kinase   | <b>0.0104</b>    | <b>-0.0153</b>    | -0.0963          | 0.3186            | <b>0.0121</b> | 155 ± 16    | 150 ± 11    | 169 ± 11    | 234 ± 28    |
| 202795_x_at | HRIHFB2122 | Tara-like protein                                 | <b>0.0164</b>    | -0.0772           | 0.1455           | 0.4316            | 0.2472        | 651 ± 52    | 717 ± 96    | 747 ± 70    | 924 ± 157   |
| 216210_x_at | HRIHFB2122 | Tara-like protein                                 | <b>0.0042</b>    | <b>-0.0021</b>    | 0.0635           | -0.0825           | <b>0.0193</b> | 711 ± 69    | 768 ± 84    | 951 ± 117   | 1468 ± 321  |
| 202098_s_at | HRMT1L1    | HMT1 hnRNP methyltransferase-like 1               | <b>0.0087</b>    | -0.2161           | -0.4997          | -0.2943           | 0.6701        | 1239 ± 83   | 1279 ± 108  | 1313 ± 85   | 1404 ± 116  |
| 203394_s_at | HRY        | hairy homolog                                     | <b>0.0467</b>    | -0.0976           | -0.4651          | 0.4699            | 0.0900        | 403 ± 50    | 438 ± 56    | 584 ± 68    | 520 ± 18    |
| 203395_s_at | HRY        | hairy homolog                                     | 0.8275           | <b>-0.0298</b>    | 0.0850           | -0.0597           | 0.1046        | 226 ± 18    | 275 ± 18    | 310 ± 16    | 336 ± 58    |
| 203283_s_at | HS2ST1     | heparan sulfate 2-O-sulfotransferase 1            | 0.1550           | <b>-0.0449</b>    | <b>0.0280</b>    | <b>-0.0483</b>    | 0.1457        | 182 ± 14    | 200 ± 27    | 245 ± 19    | 236 ± 25    |
| 217760_at   | HSA249128  | DIPB protein                                      | 0.3976           | <b>-0.0047</b>    | 0.3018           | <b>-0.0278</b>    | <b>0.0323</b> | 1139 ± 32   | 1173 ± 42   | 1158 ± 25   | 1397 ± 119  |
| 217759_at   | HSA249128  | DIPB protein                                      | 0.1238           | <b>-0.0439</b>    | -0.2991          | -0.4561           | 0.3261        | 2284 ± 91   | 2430 ± 139  | 2527 ± 175  | 2640 ± 125  |
| 218508_at   | HSA275986  | transcription factor                              | <b>0.0008</b>    | -0.1117           | 0.2660           | 0.4488            | 0.1461        | 562 ± 27    | 599 ± 47    | 595 ± 47    | 708 ± 59    |
| 200941_at   | HSBP1      | heat shock factor binding protein 1               | <b>0.0483</b>    | -0.1191           | -0.3705          | -0.1979           | 0.5439        | 1858 ± 112  | 1786 ± 145  | 2012 ± 130  | 2056 ± 199  |
| 220081_x_at | HSD17B7    | hydroxysteroid dehydrogenase 7                    | <b>0.0012</b>    | <b>-0.0018</b>    | 0.0627           | -0.1158           | <b>0.0182</b> | 664 ± 70    | 935 ± 112   | 1138 ± 128  | 1248 ± 190  |
| 221771_s_at | HSMPP8     | M-phase phosphoprotein, mpp8                      | <b>0.0335</b>    | <b>-0.0193</b>    | -0.3458          | -0.3883           | 0.1061        | 1038 ± 58   | 985 ± 28    | 1152 ± 62   | 1215 ± 104  |
| 218826_at   | HSNOV1     | novel protein                                     | <b>0.0117</b>    | <b>-0.0068</b>    | <b>0.0375</b>    | <b>-0.0022</b>    | <b>0.0004</b> | 349 ± 28    | 544 ± 56    | 451 ± 31    | 590 ± 35    |
| 205824_at   | HSPB2      | heat shock 27kDa protein 2                        | 0.0792           | <b>-0.0101</b>    | -0.4014          | -0.2725           | <b>0.0544</b> | 241 ± 36    | 244 ± 32    | 374 ± 37    | 373 ± 70    |
| 219284_at   | HSPBAP1    | HSPB associated protein 1                         | <b>0.0321</b>    | -0.0871           | -0.1388          | -0.3041           | 0.3554        | 306 ± 40    | 322 ± 12    | 332 ± 24    | 385 ± 38    |
| 219357_at   | HSPC018    | HSPC018 protein                                   | <b>0.0042</b>    | <b>-0.0086</b>    | 0.1314           | -0.4463           | <b>0.0256</b> | 567 ± 26    | 545 ± 35    | 813 ± 65    | 901 ± 168   |
| 218936_s_at | HSPC128    | HSPC128 protein                                   | 0.0594           | <b>-0.0119</b>    | 0.3851           | <b>-0.0222</b>    | 0.1222        | 325 ± 11    | 348 ± 31    | 354 ± 28    | 434 ± 54    |
| 221046_s_at | HSPC135    | HSPC135 protein                                   | <b>0.0003</b>    | -0.0720           | 0.3881           | -0.4735           | 0.1749        | 535 ± 42    | 527 ± 53    | 601 ± 51    | 762 ± 148   |
| 214328_s_at | HSPCA      | heat shock 90kDa protein 1, alpha                 | 0.1638           | <b>-0.0187</b>    | <b>-0.0232</b>   | 0.3004            | 0.0833        | 1402 ± 1190 | 3042 ± 1353 | 2437 ± 1827 | 5463 ± 2900 |
| 213645_at   | HSRTSBETA  | rTS beta protein                                  | <b>0.0150</b>    | -0.2776           | <b>0.0081</b>    | 0.3794            | 0.3304        | 368 ± 48    | 511 ± 95    | 669 ± 156   | 688 ± 233   |
| 208360_s_at | HSU88895   | endogenous retrovirus H D1 leader region          | 0.4625           | <b>-0.0383</b>    | 0.0816           | <b>-0.0392</b>    | 0.2937        | 264 ± 28    | 302 ± 30    | 293 ± 30    | 372 ± 65    |
| 209448_at   | HTATIP2    | HIV-1 Tat interactive protein 2, 30kDa            | <b>0.0003</b>    | <b>-0.0052</b>    | -0.4350          | -0.1846           | 0.0702        | 437 ± 40    | 489 ± 67    | 630 ± 66    | 684 ± 104   |
| 206639_x_at | HTN1       | histatin 1                                        | 0.2992           | <b>-0.0285</b>    | 0.1227           | -0.1586           | <b>0.0100</b> | 72 ± 13     | 103 ± 21    | 60 ± 11     | 158 ± 33    |
| 205956_x_at | HUMGT198A  | GT198, complete ORF                               | <b>0.0035</b>    | <b>-0.0230</b>    | <b>0.0304</b>    | -0.4651           | <b>0.0162</b> | 232 ± 15    | 335 ± 62    | 326 ± 26    | 402 ± 33    |
| 213230_at   | HUMPPA     | paraneoplastic antigen                            | <b>0.0069</b>    | <b>-0.0184</b>    | -0.2988          | 0.3277            | 0.1046        | 308 ± 35    | 343 ± 57    | 412 ± 31    | 534 ± 121   |
| 201904_s_at | HYA22      | HYA22 protein                                     | 0.0821           | <b>-0.0240</b>    | 0.4130           | -0.3512           | 0.1796        | 387 ± 71    | 430 ± 71    | 485 ± 45    | 616 ± 101   |

| Probe set   | Name     | Description                                                    | NFT <sub>0</sub> | MMSE <sub>0</sub> | NFT <sub>1</sub> | MMSE <sub>1</sub> | ANOVA         | Control    | Incipient  | Moderate   | Severe     |
|-------------|----------|----------------------------------------------------------------|------------------|-------------------|------------------|-------------------|---------------|------------|------------|------------|------------|
| 201906_s_at | HYA22    | HYA22 protein                                                  | <b>0.0099</b>    | <b>-0.0080</b>    | -0.4795          | -0.3534           | <b>0.0472</b> | 565 ± 54   | 607 ± 47   | 738 ± 41   | 738 ± 65   |
| 212493_s_at | HYPB     | Huntingtin interacting protein B                               | 0.0589           | <b>-0.0002</b>    | -0.2118          | -0.3614           | <b>0.0062</b> | 760 ± 40   | 677 ± 35   | 959 ± 66   | 1050 ± 123 |
| 219910_at   | HYPE     | Huntingtin interacting protein E                               | <b>0.0157</b>    | <b>-0.0208</b>    | 0.3751           | 0.3312            | <b>0.0199</b> | 385 ± 33   | 421 ± 49   | 437 ± 35   | 622 ± 89   |
| 64064_at    | IAN4L1   | immune associated nucleotide 4 like 1                          | 0.3988           | <b>-0.0081</b>    | 0.2504           | <b>-0.0512</b>    | 0.0912        | 798 ± 100  | 892 ± 58   | 862 ± 52   | 1135 ± 137 |
| 202638_s_at | ICAM1    | intercellular adhesion molecule 1 , human rhinovirus receptor  | 0.7981           | <b>-0.0215</b>    | 0.2416           | -0.1320           | 0.1649        | 145 ± 22   | 178 ± 22   | 176 ± 4    | 212 ± 25   |
| 203337_x_at | ICAP-1A  | integrin cytoplasmic domain-associated protein 1               | 0.1185           | <b>-0.0153</b>    | 0.3539           | -0.3135           | <b>0.0193</b> | 639 ± 91   | 486 ± 91   | 568 ± 42   | 856 ± 65   |
| 207826_s_at | ID3      | inhibitor of DNA binding 3                                     | 0.5310           | <b>-0.0253</b>    | <b>-0.0239</b>   | -0.4252           | 0.0887        | 330 ± 61   | 265 ± 75   | 505 ± 35   | 424 ± 83   |
| 209292_at   | ID4      | inhibitor of DNA binding 4                                     | 0.4504           | <b>-0.0427</b>    | 0.1727           | <b>-0.0110</b>    | 0.2324        | 918 ± 142  | 1154 ± 160 | 1429 ± 245 | 1321 ± 192 |
| 209291_at   | ID4      | inhibitor of DNA binding 4                                     | <b>0.0455</b>    | <b>-0.0005</b>    | 0.1097           | -0.0608           | <b>0.0090</b> | 2633 ± 276 | 3180 ± 368 | 4522 ± 521 | 4569 ± 639 |
| 210045_at   | IDH2     | isocitrate dehydrogenase 2 , mitochondrial                     | <b>0.0491</b>    | -0.1209           | 0.1369           | -0.0940           | 0.3844        | 634 ± 59   | 811 ± 126  | 869 ± 78   | 960 ± 244  |
| 213918_s_at | IDN3     | IDN3 protein                                                   | <b>0.0345</b>    | -0.5216           | -0.3798          | -0.2337           | 0.6084        | 224 ± 21   | 265 ± 20   | 240 ± 20   | 260 ± 35   |
| 212483_at   | IDN3     | IDN3 protein                                                   | <b>0.0020</b>    | <b>-0.0039</b>    | 0.2102           | -0.3477           | <b>0.0188</b> | 425 ± 37   | 454 ± 44   | 570 ± 24   | 604 ± 68   |
| 205058_at   | IDUA     | iduronidase, alpha-L-                                          | <b>0.0112</b>    | -0.0736           | 0.1242           | <b>-0.0002</b>    | 0.4207        | 136 ± 17   | 176 ± 24   | 178 ± 20   | 200 ± 48   |
| 201026_at   | IF2      | translation initiation factor IF2                              | <b>0.0304</b>    | -0.1449           | 0.1937           | 0.4380            | 0.2928        | 208 ± 26   | 238 ± 27   | 242 ± 16   | 281 ± 35   |
| 214314_s_at | IF2      | translation initiation factor IF2                              | 0.0593           | <b>-0.0046</b>    | <b>0.0239</b>    | -0.1421           | 0.0879        | 149 ± 21   | 176 ± 29   | 212 ± 36   | 264 ± 38   |
| 201025_at   | IF2      | translation initiation factor IF2                              | 0.1548           | <b>-0.0273</b>    | 0.3045           | -0.3080           | 0.1312        | 413 ± 14   | 448 ± 23   | 455 ± 26   | 529 ± 59   |
| 201024_x_at | IF2      | translation initiation factor IF2                              | <b>0.0006</b>    | <b>-0.0043</b>    | 0.2736           | -0.4404           | <b>0.0111</b> | 878 ± 96   | 839 ± 30   | 1133 ± 133 | 1577 ± 268 |
| 208965_s_at | IFI16    | interferon, gamma-inducible protein 16                         | <b>0.0073</b>    | <b>-0.0071</b>    | 0.4553           | <b>-0.0544</b>    | <b>0.0483</b> | 124 ± 22   | 139 ± 19   | 162 ± 4    | 203 ± 24   |
| 201315_x_at | IFITM2   | interferon induced transmembrane protein 2                     | 0.3289           | <b>-0.0388</b>    | <b>-0.0310</b>   | -0.4588           | 0.3639        | 2361 ± 394 | 2300 ± 275 | 2505 ± 283 | 3232 ± 572 |
| 208448_x_at | IFNA16   | interferon, alpha 16                                           | 0.4667           | <b>-0.0035</b>    | 0.1753           | 0.4397            | <b>0.0072</b> | 128 ± 11   | 106 ± 11   | 122 ± 8    | 180 ± 22   |
| 214569_at   | IFNA5    | interferon, alpha 5                                            | 0.2400           | <b>-0.0137</b>    | <b>0.0216</b>    | <b>-0.0291</b>    | 0.0697        | 101 ± 10   | 117 ± 15   | 118 ± 13   | 175 ± 34   |
| 210354_at   | IFNG     | interferon, gamma                                              | 0.5036           | <b>-0.0139</b>    | <b>0.0368</b>    | <b>-0.0010</b>    | <b>0.0536</b> | 110 ± 11   | 154 ± 22   | 119 ± 16   | 189 ± 32   |
| 202146_at   | IFRD1    | interferon-related developmental regulator 1                   | <b>0.0327</b>    | <b>-0.0262</b>    | -0.2574          | -0.3113           | 0.3104        | 1169 ± 136 | 1038 ± 96  | 1252 ± 96  | 1469 ± 257 |
| 209100_at   | IFRD2    | interferon-related developmental regulator 2                   | 0.0966           | <b>-0.0379</b>    | -0.3982          | 0.2574            | 0.2415        | 559 ± 51   | 610 ± 62   | 699 ± 60   | 722 ± 85   |
| 203628_at   | IGF1R    | insulin-like growth factor 1 receptor                          | 0.2267           | <b>-0.0415</b>    | 0.1521           | -0.0660           | 0.0931        | 244 ± 40   | 320 ± 39   | 483 ± 104  | 414 ± 51   |
| 203425_s_at | IGFBP5   | insulin-like growth factor binding protein 5                   | <b>0.0141</b>    | -0.1448           | 0.3618           | 0.0852            | 0.2220        | 144 ± 12   | 130 ± 15   | 158 ± 14   | 182 ± 24   |
| 221453_at   | IGRP     | islet-specific glucose-6-phosphatase catalytic subunit-related | <b>0.0275</b>    | <b>-0.0103</b>    | 0.2944           | -0.3287           | <b>0.0052</b> | 285 ± 28   | 336 ± 42   | 311 ± 14   | 509 ± 76   |
| 206420_at   | IGSF6    | immunoglobulin superfamily, member 6                           | 0.1250           | <b>-0.0056</b>    | 0.1719           | -0.2739           | <b>0.0135</b> | 77 ± 9     | 91 ± 8     | 87 ± 13    | 129 ± 13   |
| 204912_at   | IL10RA   | interleukin 10 receptor, alpha                                 | <b>0.0029</b>    | <b>0.0000</b>     | 0.0744           | <b>-0.0319</b>    | <b>0.0006</b> | 247 ± 18   | 309 ± 23   | 333 ± 32   | 473 ± 57   |
| 209575_at   | IL10RB   | interleukin 10 receptor, beta                                  | <b>0.0476</b>    | <b>-0.0406</b>    | 0.0583           | <b>-0.0115</b>    | 0.1471        | 180 ± 17   | 244 ± 21   | 233 ± 28   | 269 ± 43   |
| 201887_at   | IL13RA1  | interleukin 13 receptor, alpha 1                               | 0.2656           | <b>-0.0087</b>    | <b>0.0103</b>    | -0.0713           | <b>0.0294</b> | 618 ± 64   | 815 ± 64   | 768 ± 66   | 918 ± 79   |
| 212300_at   | IL14     | interleukin 14                                                 | <b>0.0148</b>    | -0.0722           | -0.2701          | -0.2278           | <b>0.0018</b> | 404 ± 25   | 375 ± 39   | 576 ± 35   | 455 ± 40   |
| 217371_s_at | IL15     | interleukin 15                                                 | 0.4004           | <b>-0.0023</b>    | 0.1822           | -0.1245           | <b>0.0124</b> | 47 ± 7     | 50 ± 7     | 55 ± 8     | 86 ± 10    |
| 205992_s_at | IL15     | interleukin 15                                                 | 0.4956           | <b>-0.0204</b>    | -0.4547          | 0.3268            | 0.0609        | 130 ± 10   | 125 ± 19   | 137 ± 22   | 191 ± 13   |
| 205707_at   | IL17R    | interleukin 17 receptor                                        | 0.4245           | <b>-0.0297</b>    | <b>0.0266</b>    | -0.2735           | 0.1405        | 427 ± 39   | 498 ± 53   | 540 ± 72   | 641 ± 77   |
| 206295_at   | IL18     | interleukin 18                                                 | 0.2454           | <b>-0.0423</b>    | 0.1406           | <b>-0.0014</b>    | 0.3269        | 70 ± 13    | 88 ± 13    | 84 ± 10    | 109 ± 22   |
| 208200_at   | IL1A     | interleukin 1, alpha                                           | <b>0.0236</b>    | <b>-0.0002</b>    | 0.2490           | -0.4684           | <b>0.0029</b> | 98 ± 9     | 102 ± 14   | 112 ± 10   | 159 ± 6    |
| 202948_at   | IL1R1    | interleukin 1 receptor, type I                                 | 0.0693           | <b>-0.0185</b>    | 0.3273           | -0.1392           | <b>0.0525</b> | 353 ± 63   | 461 ± 89   | 605 ± 61   | 547 ± 51   |
| 220663_at   | IL1RAPL1 | interleukin 1 receptor accessory protein-like 1                | 0.1197           | <b>-0.0447</b>    | -0.3947          | -0.4324           | 0.1236        | 824 ± 66   | 895 ± 89   | 1134 ± 124 | 1028 ± 110 |
| 220056_at   | IL22R    | interleukin 22 receptor                                        | <b>0.0121</b>    | -0.0863           | 0.4088           | 0.4312            | 0.1247        | 167 ± 12   | 182 ± 29   | 189 ± 18   | 247 ± 36   |
| 204116_at   | IL2RG    | interleukin 2 receptor, gamma                                  | -0.8498          | <b>-0.0379</b>    | <b>0.0390</b>    | <b>-0.0105</b>    | 0.4319        | 338 ± 34   | 394 ± 33   | 428 ± 30   | 421 ± 68   |
| 205207_at   | IL6      | interleukin 6                                                  | -0.8048          | <b>-0.0436</b>    | -0.3757          | -0.3026           | 0.0573        | 148 ± 14   | 163 ± 23   | 130 ± 21   | 227 ± 37   |

Web Table 5 (20)

| Probe set   | Name   | Description                                                  | NFT <sub>0</sub> | MMSE <sub>0</sub> | NFT <sub>1</sub> | MMSE <sub>1</sub> | ANOVA         | Control    | Incipient  | Moderate   | Severe     |
|-------------|--------|--------------------------------------------------------------|------------------|-------------------|------------------|-------------------|---------------|------------|------------|------------|------------|
| 205945_at   | IL6R   | interleukin 6 receptor                                       | 0.3942           | <b>-0.0099</b>    | <b>0.0431</b>    | -0.1237           | 0.0575        | 138 ± 14   | 157 ± 17   | 178 ± 15   | 204 ± 20   |
| 204863_s_at | IL6ST  | interleukin 6 signal transducer                              | <b>0.0045</b>    | -0.0988           | 0.2054           | -0.0903           | 0.1647        | 240 ± 21   | 259 ± 23   | 326 ± 17   | 313 ± 56   |
| 221548_s_at | ILKAP  | integrin-linked kinase-associated serine/threonine pptase 2C | <b>0.0050</b>    | <b>-0.0198</b>    | 0.3352           | 0.3466            | <b>0.0346</b> | 386 ± 23   | 402 ± 26   | 450 ± 33   | 552 ± 71   |
| 215838_at   | ILT11  | leukocyte immunoglobulin-like receptor, B7                   | 0.0840           | <b>-0.0273</b>    | 0.2746           | -0.2116           | 0.1102        | 75 ± 15    | 95 ± 20    | 104 ± 7    | 131 ± 18   |
| 205981_s_at | ING1L  | inhibitor of growth family, member 1-like                    | 0.4275           | <b>-0.0276</b>    | -0.2699          | 0.1529            | <b>0.0500</b> | 276 ± 28   | 270 ± 30   | 269 ± 31   | 376 ± 27   |
| 205070_at   | ING3   | inhibitor of growth family, member 3                         | <b>0.0279</b>    | <b>-0.0308</b>    | -0.2624          | -0.4706           | <b>0.0134</b> | 353 ± 37   | 317 ± 23   | 485 ± 49   | 420 ± 11   |
| 48825_at    | ING4   | candidate tumor suppressor p33 ING1 homolog                  | 0.1851           | <b>-0.0393</b>    | <b>-0.0523</b>   | -0.1946           | 0.2793        | 393 ± 16   | 383 ± 39   | 453 ± 34   | 447 ± 32   |
| 202794_at   | INPP1  | inositol polyphosphate-1-phosphatase                         | 0.4936           | <b>-0.0044</b>    | -0.4137          | -0.4802           | <b>0.0315</b> | 1793 ± 74  | 1683 ± 164 | 1780 ± 80  | 2192 ± 137 |
| 201598_s_at | INPPL1 | inositol polyphosphate phosphatase-like 1                    | <b>0.0032</b>    | -0.0573           | 0.1656           | -0.4308           | 0.0901        | 438 ± 36   | 578 ± 61   | 547 ± 44   | 658 ± 97   |
| 201625_s_at | INSIG1 | insulin induced gene 1                                       | 0.2919           | <b>-0.0215</b>    | -0.2624          | 0.2973            | 0.1513        | 207 ± 23   | 197 ± 30   | 229 ± 35   | 291 ± 30   |
| 213792_s_at | INSR   | insulin receptor                                             | <b>0.0001</b>    | <b>-0.0122</b>    | 0.3332           | 0.2521            | <b>0.0168</b> | 630 ± 54   | 702 ± 88   | 846 ± 106  | 1319 ± 279 |
| 219843_at   | IPP    | intracisternal A particle-promoted polypeptide               | <b>0.0356</b>    | -0.0841           | <b>0.0191</b>    | -0.0551           | 0.1628        | 153 ± 22   | 226 ± 37   | 193 ± 14   | 241 ± 43   |
| 221974_at   | IPW    | imprinted in Prader-Willi syndrome                           | <b>0.0170</b>    | <b>-0.0071</b>    | -0.3939          | -0.0576           | 0.0763        | 391 ± 46   | 393 ± 53   | 545 ± 80   | 550 ± 30   |
| 213446_s_at | IQGAP1 | IQ motif containing GTPase activating protein 1              | <b>0.0390</b>    | -0.1261           | <b>-0.0497</b>   | 0.3772            | 0.0998        | 113 ± 19   | 110 ± 5    | 121 ± 11   | 174 ± 32   |
| 203474_at   | IQGAP2 | IQ motif containing GTPase activating protein 2              | <b>0.0022</b>    | <b>-0.0507</b>    | -0.0679          | 0.3583            | 0.0697        | 80 ± 13    | 83 ± 13    | 91 ± 10    | 150 ± 36   |
| 201587_s_at | IRAK1  | interleukin-1 receptor-associated kinase 1                   | 0.2154           | <b>-0.0004</b>    | 0.1876           | -0.3026           | <b>0.0109</b> | 828 ± 81   | 819 ± 87   | 1121 ± 103 | 1294 ± 157 |
| 219618_at   | IRAK4  | interleukin-1 receptor associated kinase 4                   | 0.1283           | <b>-0.0010</b>    | 0.2831           | -0.1557           | <b>0.0120</b> | 85 ± 14    | 120 ± 12   | 128 ± 15   | 164 ± 21   |
| 202621_at   | IRF3   | interferon regulatory factor 3                               | <b>0.0036</b>    | <b>-0.0363</b>    | <b>-0.0294</b>   | -0.4987           | 0.1216        | 421 ± 52   | 372 ± 50   | 480 ± 50   | 570 ± 72   |
| 208436_s_at | IRF7   | interferon regulatory factor 7                               | 0.1181           | <b>-0.0034</b>    | 0.4770           | -0.1925           | 0.0739        | 223 ± 37   | 223 ± 29   | 267 ± 31   | 425 ± 108  |
| 209184_s_at | IRS2   | insulin receptor substrate 2                                 | <b>0.0469</b>    | <b>-0.0162</b>    | 0.2325           | 0.2139            | 0.0642        | 2760 ± 155 | 2867 ± 224 | 3221 ± 424 | 3863 ± 283 |
| 222126_at   | IRS3L  | insulin receptor substrate 3-like                            | 0.0826           | <b>-0.0055</b>    | <b>0.0235</b>    | <b>-0.0016</b>    | <b>0.0082</b> | 404 ± 19   | 573 ± 55   | 596 ± 59   | 611 ± 31   |
| 207191_s_at | ISLR   | immunoglobulin superfamily containing leucine-rich repeat    | <b>0.0425</b>    | -0.2678           | <b>0.0411</b>    | <b>-0.0151</b>    | 0.3381        | 136 ± 15   | 197 ± 20   | 193 ± 37   | 212 ± 50   |
| 214660_at   | ITGA1  | integrin, alpha 1                                            | <b>0.0126</b>    | <b>-0.0056</b>    | 0.1753           | <b>-0.0072</b>    | <b>0.0405</b> | 17 ± 2     | 23 ± 5     | 22 ± 5     | 49 ± 15    |
| 206766_at   | ITGA10 | integrin, alpha 10                                           | 0.1222           | <b>-0.0207</b>    | 0.2957           | -0.1090           | 0.0823        | 363 ± 35   | 379 ± 30   | 365 ± 13   | 474 ± 45   |
| 201656_at   | ITGA6  | integrin, alpha 6                                            | 0.3613           | <b>-0.0391</b>    | 0.0840           | <b>-0.0130</b>    | 0.3150        | 369 ± 34   | 501 ± 75   | 508 ± 78   | 516 ± 77   |
| 216331_at   | ITGA7  | integrin, alpha 7                                            | 0.0848           | <b>-0.0186</b>    | <b>0.0047</b>    | 0.4410            | <b>0.0169</b> | 794 ± 44   | 1013 ± 116 | 1377 ± 137 | 1358 ± 228 |
| 204990_s_at | ITGB4  | integrin, beta 4                                             | <b>0.0000</b>    | <b>-0.0027</b>    | 0.2021           | 0.4038            | <b>0.0090</b> | 581 ± 102  | 733 ± 162  | 1106 ± 146 | 1302 ± 210 |
| 214020_x_at | ITGB5  | integrin, beta 5                                             | 0.1007           | <b>-0.0029</b>    | 0.4578           | <b>-0.0295</b>    | 0.0715        | 301 ± 24   | 350 ± 54   | 414 ± 36   | 477 ± 75   |
| 201125_s_at | ITGB5  | integrin, beta 5                                             | <b>0.0013</b>    | <b>0.0000</b>     | 0.1029           | -0.1493           | <b>0.0009</b> | 498 ± 49   | 611 ± 65   | 704 ± 53   | 954 ± 114  |
| 201124_at   | ITGB5  | integrin, beta 5                                             | <b>0.0472</b>    | <b>-0.0014</b>    | 0.2332           | -0.2319           | <b>0.0103</b> | 480 ± 39   | 524 ± 46   | 538 ± 28   | 684 ± 51   |
| 214021_x_at | ITGB5  | integrin, beta 5                                             | <b>0.0015</b>    | <b>-0.0178</b>    | 0.4349           | 0.1124            | <b>0.0478</b> | 48 ± 5     | 48 ± 11    | 57 ± 10    | 80 ± 6     |
| 205816_at   | ITGB8  | integrin, beta 8                                             | <b>0.0013</b>    | <b>-0.0003</b>    | 0.1977           | -0.4076           | <b>0.0049</b> | 93 ± 14    | 104 ± 19   | 145 ± 16   | 171 ± 14   |
| 37201_at    | ITIH4  | inter-alpha inhibitor H4                                     | <b>0.0124</b>    | -0.2896           | 0.1498           | 0.2076            | 0.3251        | 300 ± 21   | 342 ± 43   | 322 ± 26   | 429 ± 94   |
| 210740_s_at | ITPK1  | inositol 1,3,4-triphosphate 5/6 kinase                       | 0.2014           | <b>-0.0094</b>    | 0.4446           | 0.3792            | <b>0.0311</b> | 2826 ± 150 | 2665 ± 127 | 3357 ± 193 | 3334 ± 241 |
| 203723_at   | ITPKB  | inositol 1,4,5-trisphosphate 3-kinase B                      | <b>0.0093</b>    | <b>-0.0017</b>    | -0.1140          | -0.3123           | <b>0.0230</b> | 2349 ± 446 | 2585 ± 171 | 4220 ± 708 | 4519 ± 781 |
| 213076_at   | ITPKC  | inositol 1,4,5-trisphosphate 3-kinase C                      | 0.1334           | <b>-0.0097</b>    | -0.1257          | -0.4305           | 0.0626        | 532 ± 35   | 531 ± 24   | 586 ± 42   | 761 ± 116  |
| 35776_at    | ITSN1  | intersectin 1                                                | <b>0.0464</b>    | <b>-0.0081</b>    | 0.4158           | -0.3448           | <b>0.0504</b> | 894 ± 95   | 1048 ± 115 | 1069 ± 100 | 1367 ± 152 |
| 218517_at   | Jade-1 | PHD protein Jade-1                                           | <b>0.0016</b>    | <b>-0.0002</b>    | -0.4109          | 0.3962            | <b>0.0008</b> | 529 ± 38   | 567 ± 53   | 658 ± 38   | 848 ± 75   |
| 207187_at   | JAK3   | Janus kinase 3                                               | 0.1097           | <b>-0.0064</b>    | 0.1080           | <b>-0.0339</b>    | 0.1091        | 400 ± 21   | 444 ± 30   | 438 ± 35   | 540 ± 66   |
| 214037_s_at | JM1    | JM1 protein                                                  | <b>0.0116</b>    | -0.0699           | 0.2736           | -0.4667           | 0.3091        | 95 ± 14    | 107 ± 12   | 105 ± 7    | 137 ± 26   |
| 209217_s_at | JM5    | JM5 protein                                                  | <b>0.0080</b>    | <b>-0.0142</b>    | 0.2165           | -0.2095           | 0.0621        | 669 ± 31   | 678 ± 32   | 715 ± 52   | 841 ± 63   |
| 37872_at    | JRK    | jerky homolog                                                | 0.0757           | <b>-0.0002</b>    | 0.0915           | <b>-0.0121</b>    | <b>0.0076</b> | 283 ± 17   | 303 ± 17   | 339 ± 16   | 383 ± 26   |

| Probe set   | Name     | Description                                                  | NFT <sub>0</sub> | MMSE <sub>0</sub> | NFT <sub>1</sub> | MMSE <sub>1</sub> | ANOVA         | Control    | Incipient  | Moderate   | Severe      |
|-------------|----------|--------------------------------------------------------------|------------------|-------------------|------------------|-------------------|---------------|------------|------------|------------|-------------|
| 201466_s_at | JUN      | v-jun sarcoma virus 17 oncogene homolog                      | 0.1488           | <b>-0.0383</b>    | -0.1618          | 0.4803            | 0.1224        | 283 ± 36   | 249 ± 50   | 380 ± 78   | 438 ± 58    |
| 213281_at   | JUN      | v-jun sarcoma virus 17 oncogene homolog                      | <b>0.0123</b>    | <b>-0.0462</b>    | 0.4313           | 0.4139            | <b>0.0326</b> | 231 ± 28   | 306 ± 39   | 288 ± 26   | 365 ± 21    |
| 203751_x_at | JUND     | jun D proto-oncogene                                         | 0.9400           | <b>-0.0486</b>    | 0.4937           | 0.3146            | <b>0.0237</b> | 593 ± 93   | 416 ± 57   | 426 ± 27   | 880 ± 190   |
| 203752_s_at | JUND     | jun D proto-oncogene                                         | <b>0.0006</b>    | <b>-0.0284</b>    | 0.4697           | <b>-0.0494</b>    | 0.1244        | 7987 ± 603 | 8307 ± 654 | 9983 ± 683 | 0792 ± 1603 |
| 222105_s_at | KBRAS2   | I-kappa-B-interacting Ras-like protein 2                     | <b>0.0013</b>    | -0.1363           | <b>0.0507</b>    | -0.2443           | 0.3500        | 221 ± 40   | 281 ± 34   | 343 ± 37   | 397 ± 142   |
| 205616_at   | KCNA6    | K+ VGC, shaker-related subfamily, member 6                   | 0.6276           | <b>-0.0233</b>    | <b>-0.0192</b>   | 0.3894            | <b>0.0328</b> | 201 ± 22   | 125 ± 25   | 237 ± 15   | 280 ± 63    |
| 220776_at   | KCNJ14   | K+ inwardly-rectifying channel, J14                          | <b>0.0166</b>    | <b>-0.0011</b>    | <b>0.0401</b>    | <b>-0.0048</b>    | <b>0.0048</b> | 110 ± 6    | 136 ± 12   | 132 ± 12   | 239 ± 47    |
| 211806_s_at | KCNJ15   | K+ inwardly-rectifying channel, J15                          | <b>0.0213</b>    | <b>-0.0012</b>    | 0.0722           | -0.0810           | <b>0.0117</b> | 275 ± 21   | 303 ± 23   | 339 ± 33   | 443 ± 50    |
| 220727_at   | KCNK10   | potassium channel, subfamily K, member 10                    | <b>0.0043</b>    | <b>-0.0101</b>    | <b>0.0012</b>    | -0.1831           | <b>0.0120</b> | 126 ± 9    | 154 ± 21   | 153 ± 8    | 222 ± 33    |
| 219615_s_at | KCNK5    | potassium channel, subfamily K, member 5                     | <b>0.0035</b>    | <b>-0.0001</b>    | -0.2003          | 0.2202            | <b>0.0001</b> | 116 ± 12   | 100 ± 16   | 141 ± 13   | 239 ± 31    |
| 219287_at   | KCNMB4   | K+ large conductance Ca2+-activated channel, M beta 4        | <b>0.0110</b>    | -0.0714           | 0.4940           | 0.2051            | 0.1329        | 1214 ± 88  | 1213 ± 124 | 1246 ± 76  | 1612 ± 217  |
| 205902_at   | KCNN3    | K+ intermediate/small g Ca2+-activated channel, N3           | <b>0.0037</b>    | <b>-0.0049</b>    | 0.4348           | -0.1493           | <b>0.0194</b> | 731 ± 117  | 798 ± 124  | 1374 ± 227 | 1393 ± 242  |
| 214185_at   | KHDRBS1  | KH domain containing, RNA binding, signal transd. assoc. 1   | 0.1717           | <b>-0.0007</b>    | -0.1785          | 0.1870            | <b>0.0030</b> | 200 ± 17   | 168 ± 23   | 209 ± 20   | 306 ± 34    |
| 212303_x_at | KHSRP    | KH-type splicing regulatory protein                          | <b>0.0154</b>    | -0.8695           | 0.1610           | -0.4943           | 0.4099        | 667 ± 42   | 794 ± 47   | 825 ± 87   | 748 ± 102   |
| 213552_at   | KIAA0836 | likely homol. m. hep./hep. sulfate-glucuronic ac. C5-epimer. | <b>0.0013</b>    | <b>-0.0236</b>    | 0.3785           | -0.2352           | 0.0855        | 136 ± 13   | 140 ± 20   | 177 ± 11   | 182 ± 18    |
| 200897_s_at | KIAA0992 | palladin                                                     | <b>0.0334</b>    | <b>-0.0266</b>    | 0.4983           | 0.4183            | 0.1896        | 2067 ± 288 | 1852 ± 273 | 2794 ± 382 | 2981 ± 656  |
| 200906_s_at | KIAA0992 | palladin                                                     | <b>0.0060</b>    | <b>-0.0407</b>    | <b>-0.0466</b>   | 0.4818            | 0.1323        | 140 ± 15   | 99 ± 17    | 164 ± 21   | 170 ± 33    |
| 222310_at   | KIAA1172 | pre-mRNA splicing SR protein rA4                             | <b>0.0043</b>    | <b>-0.0362</b>    | -0.3607          | -0.2180           | <b>0.0429</b> | 220 ± 27   | 241 ± 33   | 360 ± 47   | 308 ± 40    |
| 202962_at   | KIF13B   | kinesin family member 13B                                    | 0.2037           | <b>-0.0255</b>    | 0.3258           | 0.4888            | 0.0831        | 731 ± 60   | 895 ± 138  | 881 ± 81   | 1127 ± 140  |
| 206364_at   | KIF14    | kinesin family member 14                                     | <b>0.0313</b>    | <b>-0.0046</b>    | 0.1049           | -0.1069           | <b>0.0348</b> | 45 ± 8     | 40 ± 8     | 61 ± 11    | 86 ± 15     |
| 203943_at   | KIF3B    | kinesin family member 3B                                     | <b>0.0037</b>    | -0.0697           | 0.0972           | -0.2634           | 0.2003        | 1251 ± 98  | 1250 ± 61  | 1469 ± 117 | 1553 ± 178  |
| 201991_s_at | KIF5B    | kinesin family member 5B                                     | <b>0.0399</b>    | -0.1585           | -0.2502          | -0.2047           | 0.5321        | 3698 ± 153 | 3734 ± 552 | 4224 ± 421 | 4506 ± 595  |
| 207029_at   | KITLG    | KIT ligand                                                   | <b>0.0439</b>    | <b>-0.0404</b>    | -0.3623          | -0.1597           | 0.0622        | 65 ± 8     | 55 ± 6     | 80 ± 4     | 76 ± 6      |
| 210504_at   | KLF1     | Kruppel-like factor 1                                        | <b>0.0353</b>    | <b>-0.0131</b>    | -0.2229          | -0.0726           | 0.0907        | 101 ± 17   | 101 ± 12   | 101 ± 13   | 156 ± 25    |
| 219371_s_at | KLF2     | Kruppel-like factor 2                                        | 0.2745           | <b>-0.0500</b>    | <b>0.0070</b>    | -0.3375           | 0.0592        | 463 ± 36   | 681 ± 121  | 637 ± 46   | 800 ± 116   |
| 209212_s_at | KLF5     | Kruppel-like factor 5                                        | <b>0.0384</b>    | <b>-0.0386</b>    | -0.1339          | -0.4130           | <b>0.0518</b> | 177 ± 14   | 156 ± 16   | 180 ± 6    | 237 ± 33    |
| 204334_at   | KLF7     | Kruppel-like factor 7                                        | <b>0.0029</b>    | -0.0743           | <b>0.0547</b>    | -0.0926           | 0.0601        | 664 ± 44   | 848 ± 69   | 759 ± 41   | 938 ± 122   |
| 205783_at   | KLK13    | kallikrein 13                                                | <b>0.0193</b>    | <b>-0.0176</b>    | <b>-0.0057</b>   | 0.2616            | <b>0.0263</b> | 215 ± 14   | 215 ± 14   | 244 ± 29   | 314 ± 32    |
| 211519_s_at | KNSL6    | kinesin-like 6                                               | 0.1543           | <b>-0.0145</b>    | 0.0786           | -0.1533           | 0.0704        | 172 ± 19   | 193 ± 14   | 194 ± 12   | 261 ± 41    |
| 213741_s_at | KPNA1    | karyopherin alpha 1                                          | 0.5022           | <b>-0.0144</b>    | <b>-0.0111</b>   | -0.4726           | <b>0.0258</b> | 256 ± 20   | 212 ± 36   | 236 ± 19   | 318 ± 9     |
| 212101_at   | KPNA6    | karyopherin alpha 6                                          | 0.4216           | <b>-0.0240</b>    | -0.2187          | -0.3286           | 0.0978        | 763 ± 63   | 828 ± 78   | 789 ± 68   | 1028 ± 104  |
| 212102_s_at | KPNA6    | karyopherin alpha 6                                          | <b>0.0086</b>    | <b>-0.0289</b>    | -0.4737          | 0.2894            | 0.0758        | 126 ± 15   | 125 ± 16   | 139 ± 18   | 190 ± 25    |
| 213574_s_at | KPNB1    | karyopherin beta 1                                           | <b>0.0000</b>    | <b>-0.0012</b>    | 0.3691           | -0.1867           | <b>0.0057</b> | 1480 ± 67  | 1471 ± 104 | 1672 ± 66  | 2060 ± 201  |
| 213507_s_at | KPNB1    | karyopherin beta 1                                           | <b>0.0007</b>    | <b>-0.0295</b>    | 0.4863           | 0.3391            | 0.0628        | 2130 ± 92  | 2140 ± 107 | 2308 ± 164 | 2857 ± 354  |
| 207657_x_at | KPNB2    | karyopherin beta 2                                           | <b>0.0201</b>    | <b>-0.0015</b>    | 0.2631           | -0.1281           | <b>0.0160</b> | 1078 ± 122 | 974 ± 83   | 1289 ± 93  | 1601 ± 192  |
| 221829_s_at | KPNB2    | karyopherin beta 2                                           | <b>0.0002</b>    | <b>-0.0090</b>    | 0.1923           | -0.0920           | <b>0.0304</b> | 2337 ± 359 | 2292 ± 235 | 4071 ± 573 | 5202 ± 1378 |
| 214715_x_at | KR18     | KRAB zinc finger protein KR18                                | <b>0.0463</b>    | <b>-0.0301</b>    | 0.0998           | <b>-0.0290</b>    | 0.1092        | 1839 ± 257 | 1919 ± 186 | 3117 ± 542 | 2720 ± 558  |
| 200914_x_at | KTN1     | kinectin 1                                                   | <b>0.0042</b>    | <b>-0.0029</b>    | <b>0.0276</b>    | -0.0678           | <b>0.0151</b> | 1603 ± 117 | 1988 ± 199 | 2350 ± 166 | 2475 ± 279  |
| 204328_at   | LAK-4P   | expressed in activated T/LAK lymphocytes                     | <b>0.0060</b>    | <b>-0.0056</b>    | 0.3675           | -0.3177           | <b>0.0220</b> | 549 ± 58   | 562 ± 31   | 671 ± 84   | 966 ± 161   |
| 205116_at   | LAMA2    | laminin, alpha 2                                             | <b>0.0478</b>    | <b>-0.0026</b>    | <b>0.0191</b>    | -0.0749           | <b>0.0315</b> | 114 ± 10   | 149 ± 20   | 142 ± 7    | 214 ± 42    |
| 202202_s_at | LAMA4    | laminin, alpha 4                                             | <b>0.0258</b>    | -0.1425           | <b>0.0166</b>    | -0.0851           | 0.2081        | 189 ± 23   | 243 ± 37   | 280 ± 26   | 251 ± 41    |
| 216081_at   | LAMA4    | laminin, alpha 4                                             | <b>0.0214</b>    | <b>-0.0311</b>    | -0.3279          | -0.1297           | 0.1438        | 276 ± 25   | 299 ± 21   | 323 ± 36   | 431 ± 85    |

| Probe set   | Name      | Description                                             | NFT <sub>0</sub> | MMSE <sub>0</sub> | NFT <sub>1</sub> | MMSE <sub>1</sub> | ANOVA         | Control    | Incipient    | Moderate    | Severe       |
|-------------|-----------|---------------------------------------------------------|------------------|-------------------|------------------|-------------------|---------------|------------|--------------|-------------|--------------|
| 200771_at   | LAMC1     | laminin, gamma 1                                        | 0.1222           | <b>-0.0068</b>    | -0.2206          | <b>-0.0491</b>    | 0.2585        | 655 ± 58   | 659 ± 53     | 739 ± 48    | 831 ± 107    |
| 201553_s_at | LAMP1     | lysosomal-associated membrane protein 1                 | <b>0.0005</b>    | <b>-0.0216</b>    | 0.1481           | -0.3812           | 0.0864        | 9662 ± 723 | 10480 ± 1002 | 12482 ± 987 | 15386 ± 3118 |
| 218816_at   | LANO      | LAP and no PDZ protein                                  | 0.2624           | <b>-0.0241</b>    | <b>-0.0383</b>   | 0.4164            | 0.2297        | 324 ± 55   | 277 ± 33     | 387 ± 63    | 425 ± 40     |
| 207790_at   | LANO      | LAP and no PDZ protein                                  | <b>0.0009</b>    | <b>-0.0118</b>    | 0.3932           | -0.3220           | <b>0.0418</b> | 179 ± 26   | 262 ± 56     | 333 ± 60    | 412 ± 84     |
| 215538_at   | LARGE     | like-glycosyltransferase                                | 0.4473           | <b>-0.0173</b>    | 0.1346           | -0.0892           | 0.0706        | 96 ± 14    | 107 ± 13     | 106 ± 8     | 151 ± 21     |
| 219813_at   | LATS1     | LATS, large tumor suppressor, homolog 1                 | <b>0.0107</b>    | <b>-0.0175</b>    | 0.2652           | 0.4151            | <b>0.0291</b> | 76 ± 9     | 84 ± 7       | 87 ± 8      | 133 ± 25     |
| 204256_at   | LCE       | long-chain fatty-acyl elongase                          | <b>0.0081</b>    | <b>-0.0282</b>    | -0.3269          | 0.4712            | 0.0690        | 362 ± 12   | 311 ± 29     | 381 ± 29    | 420 ± 35     |
| 202068_s_at | LDLR      | low density lipoprotein receptor                        | 0.5777           | <b>-0.0036</b>    | -0.0779          | -0.3718           | <b>0.0505</b> | 520 ± 65   | 480 ± 55     | 496 ± 32    | 735 ± 97     |
| 221558_s_at | LEF1      | lymphoid enhancer-binding factor 1                      | 0.0871           | <b>-0.0053</b>    | 0.3217           | <b>-0.0455</b>    | 0.1730        | 249 ± 14   | 266 ± 32     | 308 ± 26    | 330 ± 40     |
| 200923_at   | LGALS3BP  | lectin, galactoside-binding, soluble, 3 binding protein | 0.5752           | <b>-0.0076</b>    | -0.2317          | 0.4148            | 0.1643        | 944 ± 131  | 864 ± 76     | 1097 ± 81   | 1277 ± 184   |
| 203236_s_at | LGALS9    | lectin, galactoside-binding, soluble, 9                 | <b>0.0020</b>    | <b>-0.0105</b>    | <b>0.0543</b>    | -0.2117           | <b>0.0060</b> | 237 ± 15   | 260 ± 24     | 235 ± 21    | 366 ± 42     |
| 221670_s_at | LHX3      | LIM homeobox protein 3                                  | <b>0.0357</b>    | -0.5179           | -0.2224          | 0.1234            | 0.4417        | 360 ± 33   | 308 ± 37     | 348 ± 31    | 408 ± 61     |
| 205876_at   | LIFR      | leukemia inhibitory factor receptor                     | <b>0.0020</b>    | -0.0629           | -0.1000          | 0.1700            | 0.0824        | 87 ± 13    | 73 ± 11      | 92 ± 10     | 134 ± 27     |
| 207857_at   | LILRA2    | leukocyte immunoglobulin-like receptor, A2              | <b>0.0418</b>    | <b>-0.0039</b>    | 0.1243           | -0.4168           | <b>0.0360</b> | 137 ± 19   | 150 ± 25     | 172 ± 11    | 224 ± 24     |
| 218850_s_at | LIMD1     | LIM domains containing 1                                | 0.1138           | <b>-0.0460</b>    | 0.1431           | 0.4449            | 0.0733        | 266 ± 30   | 334 ± 47     | 314 ± 26    | 441 ± 72     |
| 202193_at   | LIMK2     | LIM domain kinase 2                                     | <b>0.0058</b>    | <b>-0.0005</b>    | 0.3244           | <b>-0.0156</b>    | <b>0.0096</b> | 207 ± 22   | 238 ± 20     | 360 ± 64    | 402 ± 47     |
| 210582_s_at | LIMK2     | LIM domain kinase 2                                     | <b>0.0316</b>    | <b>-0.0213</b>    | -0.4022          | 0.4844            | 0.1292        | 500 ± 60   | 530 ± 52     | 669 ± 72    | 718 ± 100    |
| 220036_s_at | LIMR      | lipocalin-interacting membrane receptor                 | <b>0.0188</b>    | <b>-0.0294</b>    | <b>-0.0343</b>   | 0.4145            | <b>0.0315</b> | 598 ± 33   | 501 ± 28     | 599 ± 56    | 759 ± 83     |
| 219181_at   | LIPG      | lipase, endothelial                                     | <b>0.0430</b>    | <b>-0.0122</b>    | 0.1300           | 0.3529            | 0.1010        | 165 ± 19   | 164 ± 10     | 205 ± 26    | 231 ± 21     |
| 203713_s_at | LLGL2     | lethal giant larvae homolog 2                           | <b>0.0211</b>    | <b>-0.0174</b>    | -0.3217          | -0.0773           | 0.1607        | 98 ± 14    | 93 ± 23      | 149 ± 20    | 161 ± 42     |
| 220132_s_at | LLT1      | lectin-like NK cell receptor                            | 0.4310           | <b>-0.0278</b>    | 0.4441           | 0.1543            | <b>0.0318</b> | 46 ± 9     | 31 ± 5       | 53 ± 8      | 74 ± 12      |
| 203411_s_at | LMNA      | lamin A/C                                               | 0.2624           | <b>-0.0137</b>    | -0.2059          | 0.4986            | 0.0897        | 377 ± 48   | 372 ± 22     | 443 ± 31    | 503 ± 44     |
| 203276_at   | LMNB1     | lamin B1                                                | 0.2466           | <b>-0.0084</b>    | -0.0865          | -0.0733           | 0.0564        | 87 ± 21    | 79 ± 12      | 144 ± 18    | 124 ± 18     |
| 212714_at   | LOC113251 | c-Mpl binding protein                                   | 0.1719           | <b>-0.0230</b>    | -0.0951          | -0.0881           | 0.2554        | 698 ± 37   | 718 ± 68     | 721 ± 36    | 881 ± 122    |
| 213779_at   | LOC129080 | putative emu1                                           | <b>0.0037</b>    | -0.1094           | <b>0.0041</b>    | -0.3719           | 0.2095        | 408 ± 27   | 537 ± 83     | 554 ± 41    | 642 ± 141    |
| 213089_at   | LOC166994 | integral membrane glycoprotein-like                     | 0.1854           | <b>-0.0153</b>    | 0.3178           | 0.2622            | 0.1533        | 897 ± 136  | 1043 ± 229   | 1225 ± 215  | 1683 ± 364   |
| 222056_s_at | LOC51011  | CGI-105 protein                                         | <b>0.0112</b>    | -0.3071           | 0.1059           | 0.0967            | 0.2871        | 790 ± 32   | 810 ± 39     | 937 ± 74    | 891 ± 90     |
| 222158_s_at | LOC51029  | CGI-146 protein                                         | -0.7592          | <b>-0.0061</b>    | 0.4618           | 0.4169            | 0.1225        | 109 ± 10   | 83 ± 11      | 131 ± 25    | 165 ± 36     |
| 201871_s_at | LOC51035  | ORF                                                     | 0.1092           | <b>-0.0285</b>    | 0.2605           | -0.4529           | 0.1719        | 733 ± 50   | 792 ± 76     | 895 ± 85    | 930 ± 29     |
| 218258_at   | LOC51082  | RNA polymerase I 16 kDa subunit                         | 0.3085           | <b>-0.0248</b>    | 0.2509           | 0.1511            | 0.0554        | 632 ± 31   | 590 ± 38     | 609 ± 39    | 760 ± 66     |
| 221131_at   | LOC51146  | alpha-1,4-N-acetylglucosaminyltransferase               | <b>0.0548</b>    | <b>-0.0012</b>    | -0.4697          | <b>-0.0502</b>    | <b>0.0204</b> | 193 ± 15   | 210 ± 17     | 256 ± 22    | 280 ± 24     |
| 219114_at   | LOC51161  | g20 protein                                             | <b>0.0237</b>    | -0.2277           | 0.1830           | -0.3992           | 0.2764        | 276 ± 8    | 255 ± 18     | 334 ± 20    | 333 ± 63     |
| 210389_x_at | LOC51174  | delta-tubulin                                           | <b>0.0002</b>    | <b>-0.0032</b>    | <b>0.0480</b>    | -0.2489           | <b>0.0040</b> | 137 ± 12   | 193 ± 19     | 211 ± 21    | 240 ± 21     |
| 219863_at   | LOC51191  | cyclin-E binding protein 1                              | 0.1006           | <b>0.0000</b>     | 0.0916           | <b>-0.0333</b>    | <b>0.0077</b> | 252 ± 17   | 323 ± 30     | 336 ± 23    | 467 ± 73     |
| 221998_s_at | LOC51231  | VRK3 for vaccinia related kinase 3                      | <b>0.0257</b>    | -0.1420           | 0.1388           | -0.1718           | 0.6446        | 122 ± 18   | 135 ± 28     | 149 ± 18    | 161 ± 30     |
| 221999_at   | LOC51231  | VRK3 for vaccinia related kinase 3                      | <b>0.0139</b>    | <b>-0.0004</b>    | <b>0.0261</b>    | -0.2779           | <b>0.0000</b> | 330 ± 14   | 418 ± 42     | 369 ± 26    | 581 ± 24     |
| 219167_at   | LOC51285  | Ris                                                     | <b>0.0071</b>    | <b>-0.0008</b>    | 0.1168           | -0.1557           | <b>0.0181</b> | 701 ± 104  | 896 ± 140    | 1271 ± 204  | 1390 ± 197   |
| 207785_s_at | LOC51580  | H-2K binding factor-2                                   | 0.4535           | <b>-0.0452</b>    | -0.2753          | <b>-0.0126</b>    | 0.5700        | 1311 ± 84  | 1359 ± 130   | 1500 ± 64   | 1460 ± 157   |
| 219590_x_at | LOC51611  | CGI-30 protein                                          | <b>0.0095</b>    | <b>-0.0163</b>    | <b>0.0016</b>    | -0.1407           | <b>0.0243</b> | 743 ± 14   | 872 ± 58     | 863 ± 35    | 917 ± 42     |
| 65521_at    | LOC51619  | ubiquitin-conjugating enzyme HBUCE1                     | 0.0890           | <b>-0.0262</b>    | 0.4014           | 0.1929            | <b>0.0145</b> | 575 ± 38   | 589 ± 24     | 580 ± 33    | 794 ± 84     |
| 201974_s_at | LOC51622  | CGI-43 protein                                          | 0.3575           | <b>-0.0097</b>    | 0.4065           | 0.4825            | <b>0.0190</b> | 231 ± 21   | 212 ± 22     | 252 ± 23    | 331 ± 33     |
| 217842_at   | LOC51631  | CGI-74 protein                                          | <b>0.0059</b>    | <b>-0.0279</b>    | <b>0.0225</b>    | -0.2132           | <b>0.0411</b> | 470 ± 39   | 553 ± 52     | 525 ± 21    | 671 ± 73     |

| Probe set   | Name     | Description                                                     | NFT <sub>0</sub> | MMSE <sub>0</sub> | NFT <sub>1</sub> | MMSE <sub>1</sub> | ANOVA         | Control    | Incipient  | Moderate   | Severe     |
|-------------|----------|-----------------------------------------------------------------|------------------|-------------------|------------------|-------------------|---------------|------------|------------|------------|------------|
| 204097_s_at | LOC51634 | CGI-79 protein                                                  | <b>0.0153</b>    | -0.0716           | -0.1577          | 0.4835            | 0.1456        | 446 ± 31   | 414 ± 50   | 468 ± 24   | 647 ± 139  |
| 208549_x_at | LOC51685 | prothymosin a14                                                 | <b>0.0051</b>    | -0.0679           | 0.2755           | -0.2466           | 0.1181        | 1488 ± 127 | 1929 ± 316 | 1702 ± 152 | 2455 ± 459 |
| 212294_at   | LOC55970 | G-protein gamma-12 subunit                                      | 0.2331           | <b>-0.0123</b>    | -0.3488          | -0.3390           | 0.1419        | 904 ± 80   | 944 ± 88   | 1131 ± 121 | 1225 ± 141 |
| 220371_s_at | LOC56996 | cation-chloride cotransporter-interacting protein               | <b>0.0319</b>    | <b>-0.0158</b>    | 0.1159           | -0.3570           | <b>0.0280</b> | 324 ± 23   | 399 ± 50   | 371 ± 29   | 529 ± 78   |
| 219366_at   | LOC57099 | cell death regulator aven                                       | 0.0851           | <b>-0.0061</b>    | -0.2302          | -0.4037           | 0.0684        | 181 ± 26   | 163 ± 29   | 184 ± 19   | 261 ± 17   |
| 219307_at   | LOC57107 | candidate tumor suppressor protein                              | 0.4561           | <b>-0.0164</b>    | 0.4711           | 0.1795            | 0.2024        | 169 ± 11   | 167 ± 15   | 188 ± 17   | 219 ± 29   |
| 209944_at   | LOC57862 | clones 23667 and 23775 zinc finger protein                      | <b>0.0148</b>    | -0.1498           | -0.2433          | 0.3261            | 0.1760        | 1702 ± 163 | 1657 ± 157 | 2121 ± 185 | 1959 ± 143 |
| 219165_at   | LOC59346 | PDZ-LIM protein mystique                                        | <b>0.0170</b>    | <b>-0.0053</b>    | 0.1108           | -0.4421           | <b>0.0110</b> | 231 ± 34   | 193 ± 25   | 318 ± 34   | 328 ± 23   |
| 215271_at   | LOC63923 | hypothetical protein similar to tenascin-R                      | <b>0.0431</b>    | -0.0792           | 0.0656           | -0.1605           | 0.1295        | 94 ± 12    | 92 ± 9     | 111 ± 22   | 170 ± 43   |
| 212274_at   | LPIN1    | lipin 1                                                         | <b>0.0003</b>    | <b>-0.0016</b>    | 0.0580           | -0.2010           | <b>0.0060</b> | 674 ± 76   | 813 ± 98   | 1051 ± 98  | 1104 ± 93  |
| 203549_s_at | LPL      | lipoprotein lipase                                              | 0.9821           | <b>-0.0368</b>    | -0.2533          | -0.1094           | 0.1573        | 686 ± 74   | 741 ± 75   | 733 ± 79   | 943 ± 98   |
| 202822_at   | LPP      | LIM domain containing preferred translocation partner in lipoma | 0.1662           | <b>-0.0049</b>    | -0.3185          | -0.3853           | 0.1172        | 895 ± 100  | 961 ± 79   | 1095 ± 64  | 1259 ± 167 |
| 221640_s_at | LRDD     | leucine-rich and death domain containing                        | <b>0.0006</b>    | -0.0957           | 0.4677           | -0.2515           | 0.2483        | 153 ± 29   | 191 ± 30   | 256 ± 34   | 250 ± 71   |
| 201412_at   | LRP10    | low density lipoprotein receptor-related protein 10             | <b>0.0119</b>    | <b>-0.0002</b>    | 0.2710           | -0.4640           | <b>0.0106</b> | 801 ± 70   | 911 ± 86   | 1052 ± 78  | 1233 ± 120 |
| 219188_s_at | LRP16    | LRP16 protein                                                   | <b>0.0014</b>    | <b>-0.0067</b>    | -0.0644          | 0.2029            | <b>0.0161</b> | 285 ± 18   | 256 ± 36   | 303 ± 27   | 441 ± 68   |
| 212850_s_at | LRP4     | low density lipoprotein receptor-related protein 4              | 0.4666           | <b>-0.0341</b>    | -0.2210          | 0.4485            | 0.3438        | 1505 ± 191 | 1604 ± 171 | 1890 ± 175 | 2036 ± 359 |
| 34697_at    | LRP6     | low density lipoprotein receptor-related protein 6              | 0.2235           | <b>-0.0220</b>    | 0.2343           | -0.3992           | <b>0.0137</b> | 224 ± 33   | 196 ± 30   | 351 ± 37   | 292 ± 21   |
| 201861_s_at | LRRFIP1  | leucine rich repeat interacting protein 1                       | <b>0.0024</b>    | <b>-0.0143</b>    | 0.4284           | -0.3903           | <b>0.0507</b> | 341 ± 37   | 321 ± 20   | 384 ± 38   | 516 ± 81   |
| 220610_s_at | LRRFIP2  | leucine rich repeat interacting protein 2                       | <b>0.0105</b>    | -0.0587           | -0.2315          | 0.3641            | 0.1545        | 232 ± 23   | 238 ± 35   | 314 ± 27   | 302 ± 42   |
| 37796_at    | LRRN1    | leucine-rich repeat protein, neuronal 1                         | <b>0.0222</b>    | -0.1003           | 0.2211           | 0.4351            | <b>0.0365</b> | 452 ± 36   | 614 ± 131  | 437 ± 32   | 815 ± 149  |
| 90610_at    | LRRN1    | leucine-rich repeat protein, neuronal 1                         | <b>0.0021</b>    | <b>-0.0214</b>    | 0.3330           | 0.1749            | 0.0649        | 458 ± 52   | 567 ± 128  | 653 ± 83   | 909 ± 191  |
| 202903_at   | LSM5     | U6 snRNA-associated Sm-like protein                             | <b>0.0173</b>    | -0.0619           | <b>0.0028</b>    | <b>-0.0512</b>    | <b>0.0217</b> | 109 ± 11   | 168 ± 20   | 162 ± 8    | 187 ± 30   |
| 211018_at   | LSS      | lanosterol synthase                                             | 0.2231           | <b>-0.0141</b>    | <b>-0.0112</b>   | -0.1288           | 0.1810        | 115 ± 22   | 87 ± 15    | 149 ± 23   | 165 ± 39   |
| 204682_at   | LTBP2    | latent transforming growth factor beta binding protein 2        | <b>0.0068</b>    | <b>-0.0219</b>    | 0.1621           | -0.2944           | <b>0.0367</b> | 320 ± 32   | 415 ± 50   | 370 ± 22   | 529 ± 77   |
| 219922_s_at | LTBP3    | latent transforming growth factor beta binding protein 3        | 0.1899           | <b>-0.0014</b>    | 0.4053           | 0.3169            | <b>0.0141</b> | 478 ± 41   | 399 ± 56   | 559 ± 49   | 844 ± 165  |
| 40093_at    | LU       | Lutheran blood group                                            | <b>0.0257</b>    | -0.0749           | 0.2284           | 0.1117            | 0.1643        | 296 ± 24   | 293 ± 79   | 380 ± 41   | 440 ± 60   |
| 220044_x_at | LUC7A    | cisplatin resistance-associated overexpressed protein           | 0.0825           | <b>-0.0013</b>    | -0.3827          | <b>-0.0459</b>    | <b>0.0087</b> | 1293 ± 69  | 1283 ± 114 | 1646 ± 48  | 1523 ± 98  |
| 203412_at   | LZTR1    | leucine-zipper-like transcriptional regulator, 1                | <b>0.0046</b>    | -0.1107           | 0.3603           | -0.4392           | 0.1602        | 714 ± 48   | 808 ± 89   | 823 ± 70   | 986 ± 124  |
| 210302_s_at | MAB21L2  | mab-21-like 2                                                   | <b>0.0025</b>    | <b>0.0000</b>     | 0.0734           | <b>-0.0369</b>    | <b>0.0001</b> | 145 ± 11   | 188 ± 9    | 197 ± 16   | 258 ± 21   |
| 208634_s_at | MACF1    | microtubule-actin crosslinking factor 1                         | 0.1273           | <b>-0.0059</b>    | 0.2891           | -0.3500           | 0.1213        | 6029 ± 397 | 6370 ± 490 | 7020 ± 245 | 7661 ± 793 |
| 212346_s_at | MAD4     | MAX dimerization protein 4                                      | <b>0.0010</b>    | <b>-0.0265</b>    | 0.3865           | -0.2169           | 0.0819        | 389 ± 46   | 423 ± 24   | 507 ± 19   | 658 ± 144  |
| 208037_s_at | MADCAM1  | mucosal vascular addressin cell adhesion molecule 1             | <b>0.0275</b>    | -0.0619           | 0.1521           | -0.4532           | <b>0.0180</b> | 315 ± 35   | 394 ± 66   | 311 ± 25   | 537 ± 78   |
| 203077_s_at | MADH2    | MAD, mothers against decapentaplegic homolog 2                  | 0.2862           | <b>-0.0368</b>    | -0.3903          | -0.3001           | 0.3342        | 318 ± 14   | 306 ± 8    | 356 ± 23   | 355 ± 37   |
| 202526_at   | MADH4    | MAD, mothers against decapentaplegic homolog 4                  | -0.7954          | <b>-0.0096</b>    | 0.0958           | -0.1898           | 0.2556        | 92 ± 9     | 84 ± 7     | 108 ± 14   | 116 ± 13   |
| 205187_at   | MADH5    | MAD, mothers against decapentaplegic homolog 5                  | <b>0.0081</b>    | <b>-0.0343</b>    | 0.1287           | -0.1805           | <b>0.0319</b> | 53 ± 6     | 65 ± 12    | 97 ± 12    | 85 ± 12    |
| 218559_s_at | MAFB     | v-maf musculoaponeurotic fibrosarcoma oncogene homolog B        | 0.2956           | <b>-0.0035</b>    | 0.3005           | 0.1221            | <b>0.0128</b> | 407 ± 40   | 335 ± 25   | 412 ± 63   | 628 ± 80   |
| 36711_at    | MAFF     | v-maf musculoaponeurotic fibrosarcoma oncogene homolog F        | 0.1017           | <b>-0.0017</b>    | -0.1085          | -0.2944           | <b>0.0421</b> | 702 ± 150  | 781 ± 178  | 1614 ± 423 | 1741 ± 363 |
| 204970_s_at | MAFG     | v-maf musculoaponeurotic fibrosarcoma oncogene homolog G        | <b>0.0243</b>    | <b>-0.0366</b>    | -0.2613          | 0.1171            | 0.0816        | 813 ± 111  | 608 ± 41   | 890 ± 49   | 1083 ± 191 |
| 206218_at   | MAGEB2   | melanoma antigen, family B, 2                                   | <b>0.0134</b>    | <b>-0.0106</b>    | -0.4312          | 0.3334            | <b>0.0534</b> | 106 ± 13   | 96 ± 12    | 119 ± 6    | 171 ± 35   |
| 210017_at   | MALT1    | mucosa assoc. lymphoid tissue lymphoma transloc. gene 1         | <b>0.0422</b>    | <b>-0.0071</b>    | -0.3718          | <b>-0.0078</b>    | 0.0655        | 101 ± 12   | 118 ± 17   | 142 ± 9    | 145 ± 12   |
| 65884_at    | MAN1B1   | mannosidase, alpha, class 1B, member 1                          | <b>0.0158</b>    | -0.2430           | 0.1404           | -0.0781           | 0.2107        | 374 ± 26   | 395 ± 24   | 465 ± 22   | 424 ± 53   |
| 202032_s_at | MAN2A2   | mannosidase, alpha, class 2A, member 2                          | 0.5956           | <b>-0.0108</b>    | 0.4182           | -0.0852           | 0.1884        | 1141 ± 70  | 1242 ± 51  | 1307 ± 114 | 1463 ± 152 |



| Probe set   | Name     | Description                                                     | NFT <sub>0</sub> | MMSE <sub>0</sub> | NFT <sub>1</sub> | MMSE <sub>1</sub> | ANOVA         | Control    | Incipient  | Moderate   | Severe      |
|-------------|----------|-----------------------------------------------------------------|------------------|-------------------|------------------|-------------------|---------------|------------|------------|------------|-------------|
| 209166_s_at | MAN2B1   | mannosidase, alpha, class 2B, member 1                          | <b>0.0062</b>    | <b>-0.0036</b>    | -0.4465          | -0.1480           | <b>0.0134</b> | 288 ± 31   | 298 ± 60   | 328 ± 33   | 509 ± 70    |
| 202424_at   | MAP2K2   | mitogen-activated protein kinase kinase 2                       | <b>0.0280</b>    | -0.0812           | -0.4688          | 0.3035            | 0.3280        | 2156 ± 174 | 1988 ± 117 | 2579 ± 289 | 3084 ± 800  |
| 215499_at   | MAP2K3   | mitogen-activated protein kinase kinase 3                       | <b>0.0097</b>    | -0.1042           | 0.3736           | -0.4656           | 0.0598        | 334 ± 25   | 382 ± 49   | 474 ± 43   | 422 ± 25    |
| 215498_s_at | MAP2K3   | mitogen-activated protein kinase kinase 3                       | <b>0.0000</b>    | <b>-0.0003</b>    | 0.1738           | -0.1373           | <b>0.0016</b> | 207 ± 23   | 240 ± 27   | 319 ± 35   | 375 ± 28    |
| 216206_x_at | MAP2K7   | mitogen-activated protein kinase kinase 7                       | <b>0.0135</b>    | <b>-0.0257</b>    | 0.1166           | -0.0778           | 0.0755        | 196 ± 25   | 197 ± 14   | 307 ± 43   | 292 ± 53    |
| 203652_at   | MAP3K11  | mitogen-activated protein kinase kinase kinase 11               | <b>0.0016</b>    | <b>-0.0166</b>    | 0.2092           | 0.3177            | <b>0.0530</b> | 704 ± 45   | 738 ± 87   | 863 ± 92   | 1180 ± 233  |
| 205192_at   | MAP3K14  | mitogen-activated protein kinase kinase kinase 14               | <b>0.0340</b>    | <b>-0.0191</b>    | 0.2121           | -0.3673           | 0.1328        | 309 ± 42   | 367 ± 40   | 385 ± 33   | 480 ± 78    |
| 203514_at   | MAP3K3   | mitogen-activated protein kinase kinase kinase 3                | <b>0.0016</b>    | <b>-0.0190</b>    | 0.1606           | -0.3785           | 0.0662        | 349 ± 29   | 414 ± 55   | 480 ± 26   | 540 ± 84    |
| 243_g_at    | MAP4     | microtubule-associated protein 4                                | <b>0.0076</b>    | -0.1287           | 0.1900           | -0.4409           | 0.2930        | 1991 ± 134 | 1954 ± 216 | 2538 ± 254 | 2367 ± 390  |
| 212567_s_at | MAP4     | microtubule-associated protein 4                                | <b>0.0096</b>    | -0.2729           | 0.3683           | -0.3555           | 0.1948        | 1624 ± 178 | 1683 ± 227 | 2304 ± 164 | 1907 ± 390  |
| 212566_at   | MAP4     | microtubule-associated protein 4                                | <b>0.0186</b>    | -0.1349           | 0.2724           | 0.1356            | 0.2787        | 5182 ± 271 | 4426 ± 263 | 5819 ± 566 | 6610 ± 1381 |
| 202890_at   | MAP7     | microtubule-associated protein 7                                | 0.4108           | <b>-0.0418</b>    | -0.2125          | -0.2200           | 0.3319        | 1664 ± 158 | 1720 ± 217 | 2051 ± 218 | 2005 ± 115  |
| 208351_s_at | MAPK1    | mitogen-activated protein kinase 1                              | <b>0.0028</b>    | <b>-0.0084</b>    | -0.0824          | 0.0572            | <b>0.0053</b> | 212 ± 14   | 184 ± 12   | 226 ± 15   | 272 ± 20    |
| 206106_at   | MAPK12   | mitogen-activated protein kinase 12                             | <b>0.0116</b>    | -0.1412           | 0.2112           | -0.0892           | 0.2916        | 192 ± 21   | 238 ± 31   | 234 ± 16   | 298 ± 72    |
| 201460_at   | MAPKAPK2 | mitogen-activated protein kinase-activated protein kinase 2     | <b>0.0088</b>    | <b>-0.0414</b>    | 0.1902           | 0.2697            | 0.0992        | 644 ± 44   | 761 ± 104  | 763 ± 80   | 940 ± 98    |
| 202569_s_at | MARK3    | MAP/microtubule affinity-regulating kinase 3                    | <b>0.0053</b>    | <b>-0.0096</b>    | -0.2661          | -0.1510           | <b>0.0082</b> | 364 ± 27   | 358 ± 14   | 466 ± 23   | 435 ± 25    |
| 206449_s_at | MASP1    | mannan-binding lectin serine protease 1                         | -0.5137          | <b>-0.0187</b>    | 0.2096           | 0.3410            | <b>0.0039</b> | 117 ± 8    | 105 ± 8    | 87 ± 13    | 171 ± 24    |
| 215903_s_at | MAST205  | microtubule assoc. testis spec. serine/threonine protein kinase | <b>0.0133</b>    | <b>-0.0046</b>    | 0.2525           | -0.2152           | <b>0.0164</b> | 562 ± 48   | 503 ± 48   | 703 ± 47   | 780 ± 90    |
| 213705_at   | MAT2A    | methionine adenosyltransferase II, alpha                        | 0.1291           | <b>-0.0001</b>    | <b>0.0133</b>    | <b>-0.0184</b>    | <b>0.0038</b> | 316 ± 29   | 434 ± 58   | 490 ± 25   | 733 ± 137   |
| 200768_s_at | MAT2A    | methionine adenosyltransferase II, alpha                        | 0.1428           | <b>-0.0484</b>    | -0.3430          | -0.0566           | 0.3635        | 2439 ± 309 | 2542 ± 196 | 2992 ± 172 | 2956 ± 359  |
| 202350_s_at | MATN2    | matrilin 2                                                      | 0.1427           | <b>-0.0007</b>    | 0.0691           | <b>-0.0219</b>    | <b>0.0266</b> | 377 ± 45   | 508 ± 59   | 471 ± 46   | 634 ± 76    |
| 209331_s_at | MAX      | MAX protein                                                     | <b>0.0335</b>    | -0.1708           | 0.2483           | -0.1402           | 0.3918        | 692 ± 41   | 737 ± 53   | 827 ± 51   | 770 ± 86    |
| 209332_s_at | MAX      | MAX protein                                                     | 0.0672           | <b>-0.0078</b>    | -0.1406          | 0.2432            | <b>0.0402</b> | 2796 ± 181 | 2330 ± 97  | 2998 ± 170 | 3381 ± 374  |
| 212064_x_at | MAZ      | MYC-associated zinc finger protein                              | <b>0.0249</b>    | -0.4632           | <b>-0.0091</b>   | 0.3543            | 0.1634        | 1125 ± 75  | 1036 ± 57  | 1420 ± 97  | 1218 ± 206  |
| 204179_at   | MB       | myoglobin                                                       | 0.3415           | <b>-0.0084</b>    | -0.1165          | 0.2485            | 0.0711        | 198 ± 24   | 185 ± 8    | 224 ± 19   | 276 ± 37    |
| 41160_at    | MBD3     | methyl-CpG binding domain protein 3                             | <b>0.0124</b>    | <b>-0.0232</b>    | 0.2830           | -0.3059           | 0.0881        | 1863 ± 130 | 1716 ± 106 | 2335 ± 218 | 2529 ± 404  |
| 210136_at   | MBP      | myelin basic protein                                            | <b>0.0343</b>    | <b>-0.0383</b>    | <b>0.0285</b>    | -0.4138           | 0.2970        | 1624 ± 245 | 1962 ± 326 | 2352 ± 674 | 3195 ± 956  |
| 205458_at   | MC1R     | melanocortin 1 receptor                                         | 0.2192           | <b>-0.0198</b>    | 0.3825           | 0.4837            | 0.1997        | 212 ± 19   | 193 ± 23   | 261 ± 34   | 297 ± 57    |
| 205716_at   | MCFP     | mitochondrial carrier family protein                            | 0.7286           | <b>-0.0439</b>    | 0.1984           | 0.2795            | 0.0938        | 138 ± 13   | 120 ± 8    | 129 ± 13   | 173 ± 19    |
| 214057_at   | MCL1     | myeloid cell leukemia sequence 1                                | <b>0.0414</b>    | <b>-0.0009</b>    | <b>0.0519</b>    | <b>-0.0378</b>    | <b>0.0349</b> | 209 ± 16   | 232 ± 21   | 253 ± 29   | 314 ± 29    |
| 200797_s_at | MCL1     | myeloid cell leukemia sequence 1                                | <b>0.0203</b>    | <b>-0.0030</b>    | <b>-0.0489</b>   | 0.4306            | 0.0652        | 1766 ± 169 | 1533 ± 75  | 1987 ± 160 | 2475 ± 430  |
| 208795_s_at | MCM7     | MCM7 minichromosome maintenance deficient 7                     | <b>0.0461</b>    | -0.2606           | -0.1340          | 0.2613            | 0.5904        | 439 ± 69   | 431 ± 52   | 535 ± 72   | 545 ± 101   |
| 213761_at   | MDM1     | nuclear protein double minute 1                                 | 0.2852           | <b>-0.0015</b>    | 0.0725           | <b>-0.0364</b>    | <b>0.0135</b> | 315 ± 13   | 386 ± 26   | 389 ± 21   | 418 ± 25    |
| 207078_at   | MED6     | RNA polymerase II transcriptional regulation mediator           | 0.1388           | <b>-0.0413</b>    | 0.2022           | -0.2359           | 0.1339        | 117 ± 10   | 153 ± 27   | 158 ± 22   | 183 ± 14    |
| 213816_s_at | MET      | met proto-oncogene                                              | <b>0.0087</b>    | -0.0686           | <b>0.0403</b>    | -0.2312           | 0.0995        | 136 ± 13   | 182 ± 30   | 168 ± 17   | 220 ± 32    |
| 203406_at   | MFAP1    | microfibrillar-associated protein 1                             | <b>0.0001</b>    | <b>-0.0001</b>    | <b>0.0005</b>    | <b>-0.0454</b>    | <b>0.0004</b> | 877 ± 21   | 956 ± 44   | 1096 ± 20  | 1111 ± 58   |
| 201126_s_at | MGAT1    | mannosyl -glycoprot. β-1,2-N-acetylglucosaminyltransferase      | <b>0.0216</b>    | -0.1793           | 0.2577           | -0.4527           | 0.3490        | 573 ± 43   | 603 ± 45   | 682 ± 46   | 677 ± 73    |
| 209497_s_at | MGC10871 | hypothetical protein similar to RNA-binding protein lark        | <b>0.0324</b>    | -0.3426           | -0.4598          | 0.3893            | 0.4320        | 601 ± 85   | 758 ± 106  | 710 ± 73   | 813 ± 119   |
| 64408_s_at  | MGC4809  | serologically defined breast cancer antigen NY-BR-20            | <b>0.0268</b>    | -0.0786           | -0.4929          | <b>-0.0433</b>    | 0.2675        | 65 ± 9     | 64 ± 9     | 89 ± 17    | 92 ± 14     |
| 205905_s_at | MICA     | MHC class I polypeptide-related sequence A                      | 0.0711           | <b>-0.0399</b>    | 0.1274           | -0.4064           | 0.1107        | 155 ± 13   | 180 ± 23   | 176 ± 19   | 261 ± 59    |
| 206247_at   | MICB     | MHC class I polypeptide-related sequence B                      | <b>0.0038</b>    | <b>-0.0005</b>    | 0.1496           | 0.1426            | <b>0.0044</b> | 138 ± 10   | 122 ± 5    | 192 ± 27   | 283 ± 52    |
| 210694_s_at | MID1     | midline 1                                                       | 0.0751           | <b>-0.0048</b>    | -0.4117          | -0.1303           | 0.0584        | 370 ± 40   | 422 ± 64   | 414 ± 29   | 577 ± 78    |

| Probe set   | Name   | Description                                                | NFT <sub>0</sub> | MMSE <sub>0</sub> | NFT <sub>1</sub> | MMSE <sub>1</sub> | ANOVA         | Control     | Incipient   | Moderate    | Severe      |
|-------------|--------|------------------------------------------------------------|------------------|-------------------|------------------|-------------------|---------------|-------------|-------------|-------------|-------------|
| 207233_s_at | MITF   | microphthalmia-associated transcription factor             | <b>0.0224</b>    | -0.0609           | 0.1805           | -0.2943           | 0.1083        | 407 ± 48    | 554 ± 66    | 537 ± 52    | 637 ± 96    |
| 218205_s_at | MKNK2  | MAP kinase-interacting serine/threonine kinase 2           | <b>0.0001</b>    | <b>-0.0058</b>    | 0.3211           | -0.3921           | 0.0601        | 1678 ± 152  | 1789 ± 282  | 2409 ± 305  | 2758 ± 418  |
| 218845_at   | MKPX   | mitogen-activated protein kinase phosphatase x             | <b>0.0038</b>    | <b>-0.0282</b>    | 0.3287           | 0.2653            | <b>0.0136</b> | 1014 ± 42   | 1014 ± 93   | 1046 ± 53   | 1457 ± 183  |
| 201285_at   | MKRN1  | makorin, ring finger protein, 1                            | 0.2066           | <b>-0.0168</b>    | -0.1629          | -0.4398           | 0.2428        | 1013 ± 33   | 1016 ± 51   | 1106 ± 36   | 1121 ± 65   |
| 208082_x_at | MKRN4  | makorin, ring finger protein, 4                            | <b>0.0259</b>    | -0.3632           | 0.2007           | -0.1776           | 0.0991        | 900 ± 92    | 977 ± 114   | 1336 ± 126  | 1017 ± 188  |
| 206426_at   | MLANA  | melan-A                                                    | <b>0.0053</b>    | -0.0574           | <b>0.0085</b>    | -0.3347           | 0.2505        | 57 ± 6      | 72 ± 14     | 83 ± 10     | 102 ± 27    |
| 213395_at   | MLC1   | megalencephalic leukoencephalopathy w/ subcortical cysts 1 | <b>0.0201</b>    | -0.1278           | 0.1608           | -0.3273           | 0.0755        | 1076 ± 142  | 1294 ± 213  | 1793 ± 138  | 1416 ± 288  |
| 212079_s_at | MLLT2  | myeloid/lymphoid or mixed-lineage leukemia                 | <b>0.0051</b>    | <b>-0.0525</b>    | 0.2902           | -0.2032           | 0.1785        | 145 ± 26    | 180 ± 23    | 206 ± 31    | 286 ± 83    |
| 201924_at   | MLLT2  | myeloid/lymphoid or mixed-lineage leukemia                 | <b>0.0059</b>    | <b>-0.0009</b>    | -0.3971          | 0.3371            | <b>0.0224</b> | 1667 ± 129  | 1606 ± 134  | 2181 ± 213  | 2576 ± 399  |
| 207842_s_at | MLN51  | MLN51 protein                                              | <b>0.0036</b>    | <b>-0.0007</b>    | 0.2351           | <b>-0.0527</b>    | <b>0.0062</b> | 1372 ± 115  | 1647 ± 183  | 2256 ± 256  | 2199 ± 212  |
| 204580_at   | MMP12  | matrix metalloproteinase 12                                | -0.9509          | <b>-0.0303</b>    | 0.1792           | 0.2065            | <b>0.0077</b> | 116 ± 12    | 100 ± 9     | 99 ± 7      | 163 ± 19    |
| 207012_at   | MMP16  | matrix metalloproteinase 16                                | 0.7754           | <b>-0.0464</b>    | 0.1365           | -0.1226           | 0.2746        | 100 ± 9     | 98 ± 8      | 114 ± 10    | 131 ± 21    |
| 201069_at   | MMP2   | matrix metalloproteinase 2                                 | 0.0807           | <b>-0.0240</b>    | 0.1786           | 0.3588            | <b>0.0292</b> | 242 ± 30    | 327 ± 49    | 269 ± 24    | 419 ± 62    |
| 220201_at   | MNAB   | membrane-associated nucleic acid binding protein           | 0.5069           | <b>-0.0365</b>    | -0.2946          | 0.1330            | <b>0.0309</b> | 143 ± 15    | 95 ± 20     | 146 ± 20    | 195 ± 28    |
| 212452_x_at | MORF   | monocytic leukemia zinc finger protein-related factor      | <b>0.0139</b>    | -0.0906           | -0.1931          | -0.2322           | 0.1619        | 479 ± 47    | 480 ± 21    | 605 ± 44    | 590 ± 77    |
| 212462_at   | MORF   | monocytic leukemia zinc finger protein-related factor      | <b>0.0042</b>    | <b>-0.0079</b>    | 0.4942           | -0.3379           | <b>0.0143</b> | 803 ± 53    | 805 ± 25    | 962 ± 41    | 1075 ± 104  |
| 203524_s_at | MPST   | mercaptopyruvate sulfurtransferase                         | <b>0.0052</b>    | <b>-0.0287</b>    | -0.1137          | 0.1436            | <b>0.0278</b> | 580 ± 61    | 565 ± 45    | 603 ± 78    | 875 ± 108   |
| 206538_at   | MRAS   | muscle RAS oncogene homolog                                | <b>0.0163</b>    | -0.7755           | 0.4340           | 0.2705            | 0.2830        | 152 ± 29    | 208 ± 43    | 243 ± 29    | 203 ± 36    |
| 204387_x_at | MRP63  | mitochondrial ribosomal protein 63                         | <b>0.0274</b>    | <b>-0.0247</b>    | 0.3553           | -0.2007           | 0.0973        | 806 ± 83    | 796 ± 43    | 1001 ± 72   | 1039 ± 117  |
| 221995_s_at | MRP63  | mitochondrial ribosomal protein 63                         | <b>0.0236</b>    | <b>-0.0306</b>    | 0.0945           | 0.4858            | <b>0.0078</b> | 234 ± 20    | 296 ± 32    | 249 ± 8     | 434 ± 74    |
| 41220_at    | MSF    | MLL septin-like fusion                                     | <b>0.0201</b>    | <b>-0.0019</b>    | 0.1894           | 0.4429            | <b>0.0079</b> | 3652 ± 302  | 3381 ± 172  | 4726 ± 414  | 5008 ± 399  |
| 210533_at   | MSH4   | mutS homolog 4                                             | <b>0.0428</b>    | -0.0565           | -0.1952          | -0.0760           | 0.1417        | 112 ± 11    | 116 ± 13    | 109 ± 12    | 173 ± 39    |
| 205932_s_at | MSX1   | msh homeo box homolog 1                                    | <b>0.0189</b>    | <b>-0.0007</b>    | 0.2089           | -0.1222           | <b>0.0141</b> | 596 ± 38    | 676 ± 106   | 778 ± 61    | 1163 ± 229  |
| 206461_x_at | MT1H   | metallothionein 1H                                         | 0.4224           | <b>-0.0184</b>    | -0.4401          | -0.1084           | 0.1491        | 7403 ± 686  | 8572 ± 632  | 8638 ± 906  | 9388 ± 1269 |
| 204326_x_at | MT1L   | metallothionein 1L                                         | 0.1130           | <b>-0.0139</b>    | 0.4215           | -0.1706           | <b>0.0272</b> | 6290 ± 635  | 7881 ± 601  | 7372 ± 890  | 9500 ± 318  |
| 208581_x_at | MT1X   | metallothionein 1X                                         | 0.7046           | <b>-0.0358</b>    | -0.2987          | -0.1080           | 0.1314        | 0620 ± 1243 | 12186 ± 687 | 1168 ± 1145 | 4632 ± 1617 |
| 212185_x_at | MT2A   | metallothionein 2A                                         | 0.6080           | <b>-0.0283</b>    | -0.3102          | -0.2349           | 0.1771        | 7870 ± 2129 | 8902 ± 1006 | 101 ± 1397  | 3863 ± 2800 |
| 211783_s_at | MTA1   | metastasis associated 1                                    | <b>0.0495</b>    | <b>-0.0048</b>    | -0.4272          | 0.2196            | <b>0.0022</b> | 917 ± 50    | 837 ± 17    | 944 ± 68    | 1368 ± 167  |
| 205323_s_at | MTF1   | metal-regulatory transcription factor 1                    | <b>0.0336</b>    | <b>-0.0001</b>    | 0.2922           | -0.0566           | <b>0.0111</b> | 419 ± 32    | 476 ± 32    | 538 ± 22    | 570 ± 43    |
| 203433_at   | MTHFS  | 5,10-methenyltetrahydrofolate synthetase                   | <b>0.0063</b>    | -0.1228           | 0.2313           | -0.0677           | 0.4588        | 260 ± 33    | 242 ± 53    | 274 ± 58    | 355 ± 63    |
| 203095_at   | MTIF2  | mitochondrial translational initiation factor 2            | <b>0.0002</b>    | <b>-0.0065</b>    | 0.0930           | -0.2917           | <b>0.0418</b> | 411 ± 31    | 418 ± 35    | 522 ± 44    | 575 ± 63    |
| 207847_s_at | MUC1   | mucin 1, transmembrane                                     | 0.0790           | <b>-0.0180</b>    | 0.4843           | 0.3841            | <b>0.0227</b> | 254 ± 29    | 263 ± 35    | 267 ± 14    | 414 ± 64    |
| 217117_x_at | MUC3A  | mucin 3A, intestinal                                       | 0.2290           | <b>-0.0012</b>    | 0.0708           | <b>-0.0535</b>    | <b>0.0234</b> | 411 ± 27    | 448 ± 40    | 480 ± 53    | 645 ± 77    |
| 207727_s_at | MUTYH  | mutY homolog                                               | <b>0.0200</b>    | <b>-0.0354</b>    | 0.4997           | 0.4970            | 0.1024        | 634 ± 69    | 753 ± 92    | 729 ± 39    | 910 ± 99    |
| 36907_at    | MVK    | mevalonate kinase                                          | 0.0798           | <b>-0.0020</b>    | 0.3448           | 0.4876            | <b>0.0052</b> | 1115 ± 24   | 1287 ± 95   | 1265 ± 96   | 1610 ± 105  |
| 204994_at   | MX2    | myxovirus resistance 2                                     | 0.5644           | <b>-0.0276</b>    | 0.2472           | -0.2149           | 0.1845        | 289 ± 25    | 311 ± 30    | 290 ± 26    | 432 ± 99    |
| 202364_at   | MXI1   | MAX interacting protein 1                                  | <b>0.0543</b>    | <b>-0.0153</b>    | <b>-0.0209</b>   | -0.3737           | 0.1029        | 4690 ± 458  | 4852 ± 492  | 5951 ± 413  | 5997 ± 504  |
| 213906_at   | MYBL1  | v-myb myeloblastosis viral oncogene homolog -like 1        | 0.0637           | <b>-0.0039</b>    | 0.3402           | -0.1240           | <b>0.0518</b> | 172 ± 15    | 197 ± 16    | 249 ± 36    | 245 ± 14    |
| 214087_s_at | MYBPC1 | myosin binding protein C, slow type                        | 0.1441           | <b>-0.0324</b>    | -0.2576          | -0.3289           | 0.1974        | 1473 ± 271  | 1384 ± 106  | 2123 ± 249  | 2011 ± 441  |
| 209757_s_at | MYCN   | v-myc myelocytomatosis viral related oncogene              | 0.1525           | <b>-0.0008</b>    | 0.4780           | -0.1110           | <b>0.0260</b> | 113 ± 12    | 130 ± 22    | 166 ± 17    | 180 ± 12    |
| 217274_x_at | MYL4   | myosin, light polypeptide 4, alkali; atrial, embryonic     | <b>0.0416</b>    | <b>-0.0287</b>    | 0.3234           | -0.2108           | 0.0551        | 220 ± 15    | 212 ± 10    | 227 ± 14    | 337 ± 68    |
| 202555_s_at | MYLK   | myosin, light polypeptide kinase                           | <b>0.0195</b>    | <b>-0.0367</b>    | 0.2422           | -0.1911           | 0.1238        | 788 ± 87    | 970 ± 98    | 985 ± 124   | 1151 ± 104  |

| Probe set   | Name    | Description                                                  | NFT <sub>0</sub> | MMSE <sub>0</sub> | NFT <sub>1</sub> | MMSE <sub>1</sub> | ANOVA         | Control    | Incipient  | Moderate   | Severe     |
|-------------|---------|--------------------------------------------------------------|------------------|-------------------|------------------|-------------------|---------------|------------|------------|------------|------------|
| 201976_s_at | MYO10   | myosin X                                                     | 0.0988           | <b>-0.0457</b>    | <b>0.0290</b>    | -0.2051           | 0.1025        | 3064 ± 290 | 3944 ± 556 | 4474 ± 301 | 4214 ± 576 |
| 59375_at    | MYO15BP | myosin XVB pseudogene                                        | <b>0.0454</b>    | -0.2505           | 0.1104           | 0.4554            | 0.1478        | 560 ± 46   | 703 ± 99   | 528 ± 39   | 865 ± 200  |
| 211916_s_at | MYO1A   | myosin IA                                                    | <b>0.0123</b>    | <b>-0.0142</b>    | -0.3886          | <b>-0.0494</b>    | <b>0.0495</b> | 214 ± 13   | 229 ± 20   | 240 ± 13   | 314 ± 45   |
| 32811_at    | MYO1C   | myosin IC                                                    | 0.2342           | <b>-0.0186</b>    | 0.3034           | -0.3232           | 0.0939        | 1185 ± 113 | 1162 ± 118 | 1272 ± 35  | 1621 ± 213 |
| 203072_at   | MYO1E   | myosin IE                                                    | 0.1401           | <b>-0.0248</b>    | 0.2110           | -0.0881           | <b>0.0100</b> | 175 ± 22   | 239 ± 14   | 187 ± 17   | 265 ± 23   |
| 212667_at   | MYO1F   | myosin IF                                                    | 0.0775           | <b>0.0000</b>     | -0.1813          | -0.2269           | <b>0.0012</b> | 2144 ± 409 | 2016 ± 262 | 3497 ± 590 | 5316 ± 867 |
| 218966_at   | MYO5C   | myosin 5C                                                    | <b>0.0277</b>    | <b>-0.0019</b>    | 0.2926           | -0.3093           | <b>0.0052</b> | 512 ± 35   | 624 ± 61   | 579 ± 47   | 816 ± 83   |
| 203215_s_at | MYO6    | myosin VI                                                    | <b>0.0181</b>    | -0.2041           | 0.1624           | -0.0700           | 0.3753        | 158 ± 40   | 217 ± 49   | 202 ± 30   | 323 ± 126  |
| 214780_s_at | MYO9B   | myosin IXB                                                   | <b>0.0028</b>    | <b>-0.0088</b>    | 0.1093           | -0.3535           | <b>0.0218</b> | 490 ± 33   | 647 ± 68   | 738 ± 69   | 837 ± 119  |
| 205610_at   | MYOM1   | myomesin 1 185kDa                                            | <b>0.0003</b>    | <b>-0.0017</b>    | 0.3562           | -0.0983           | <b>0.0161</b> | 85 ± 21    | 101 ± 16   | 179 ± 23   | 198 ± 46   |
| 32069_at    | N4BP1   | Nedd4 binding protein 1                                      | <b>0.0019</b>    | <b>-0.0011</b>    | <b>-0.0359</b>   | -0.4043           | <b>0.0073</b> | 327 ± 27   | 309 ± 42   | 374 ± 26   | 470 ± 20   |
| 207196_s_at | NAF1    | Nef-associated factor 1                                      | <b>0.0067</b>    | <b>-0.0010</b>    | 0.0764           | -0.0589           | <b>0.0063</b> | 465 ± 33   | 520 ± 39   | 633 ± 35   | 656 ± 59   |
| 202926_at   | NAG     | neuroblastoma-amplified protein                              | <b>0.0038</b>    | -0.0877           | <b>0.0297</b>    | -0.1395           | 0.1210        | 589 ± 40   | 749 ± 55   | 715 ± 60   | 787 ± 89   |
| 202943_s_at | NAGA    | N-acetylgalactosaminidase, alpha-                            | 0.2581           | <b>-0.0058</b>    | 0.2561           | -0.3471           | 0.0625        | 403 ± 31   | 424 ± 25   | 433 ± 23   | 526 ± 46   |
| 218064_s_at | NAKAP95 | neighbor of A-kinase anchoring protein 95                    | 0.0589           | <b>-0.0073</b>    | -0.1590          | <b>0.0080</b>     | <b>0.0038</b> | 772 ± 59   | 600 ± 55   | 859 ± 67   | 1579 ± 343 |
| 208754_s_at | NAP1L1  | nucleosome assembly protein 1-like 1                         | <b>0.0526</b>    | <b>-0.0111</b>    | 0.4410           | <b>-0.0078</b>    | <b>0.0357</b> | 1696 ± 113 | 1839 ± 140 | 2296 ± 187 | 2036 ± 143 |
| 204528_s_at | NAP1L1  | nucleosome assembly protein 1-like 1                         | <b>0.0216</b>    | <b>-0.0102</b>    | 0.3438           | <b>-0.0016</b>    | 0.1583        | 1207 ± 78  | 1335 ± 97  | 1497 ± 134 | 1493 ± 107 |
| 201414_s_at | NAP1L4  | nucleosome assembly protein 1-like 4                         | <b>0.0326</b>    | -0.2180           | 0.1773           | 0.4221            | 0.2869        | 919 ± 56   | 967 ± 94   | 1116 ± 44  | 1047 ± 116 |
| 218330_s_at | NAV2    | neuron navigator 2                                           | 0.2265           | <b>-0.0010</b>    | -0.2585          | <b>-0.0533</b>    | <b>0.0269</b> | 891 ± 93   | 972 ± 72   | 1264 ± 119 | 1392 ± 199 |
| 201913_s_at | NBP     | nucleotide binding protein                                   | 0.2950           | <b>-0.0249</b>    | 0.0855           | -0.0581           | 0.3742        | 815 ± 57   | 869 ± 76   | 961 ± 143  | 1087 ± 140 |
| 212843_at   | NCAM1   | neural cell adhesion molecule 1                              | <b>0.0080</b>    | -0.0607           | -0.4805          | 0.2158            | 0.1489        | 4141 ± 191 | 4068 ± 411 | 4850 ± 375 | 5222 ± 565 |
| 211063_s_at | NCK1    | NCK adaptor protein 1                                        | <b>0.0501</b>    | <b>-0.0283</b>    | -0.4487          | 0.2968            | 0.0891        | 655 ± 25   | 566 ± 20   | 749 ± 71   | 735 ± 64   |
| 209061_at   | NCOA3   | nuclear receptor coactivator 3                               | 0.2199           | <b>-0.0442</b>    | 0.3014           | <b>-0.0053</b>    | 0.1038        | 166 ± 24   | 218 ± 19   | 226 ± 12   | 279 ± 54   |
| 207760_s_at | NCOR2   | nuclear receptor co-repressor 2                              | <b>0.0007</b>    | <b>-0.0205</b>    | 0.3161           | 0.1962            | <b>0.0084</b> | 2231 ± 141 | 2095 ± 171 | 2767 ± 139 | 2938 ± 277 |
| 208759_at   | NCSTN   | nicastrin                                                    | <b>0.0022</b>    | <b>-0.0148</b>    | 0.2609           | 0.3984            | <b>0.0215</b> | 604 ± 28   | 646 ± 50   | 620 ± 30   | 783 ± 54   |
| 202607_at   | NDST1   | N-deacetylase/N-sulfotransferase 1                           | 0.0605           | <b>-0.0342</b>    | -0.4743          | <b>-0.0392</b>    | <b>0.0542</b> | 499 ± 57   | 560 ± 55   | 761 ± 37   | 644 ± 102  |
| 207279_s_at | NEBL    | nebulette                                                    | 0.3703           | <b>-0.0374</b>    | 0.4559           | -0.0767           | 0.4722        | 241 ± 17   | 243 ± 27   | 265 ± 26   | 297 ± 38   |
| 203961_at   | NEBL    | nebulette                                                    | <b>0.0496</b>    | <b>-0.0037</b>    | -0.4161          | <b>-0.0204</b>    | 0.0710        | 5126 ± 259 | 5476 ± 442 | 6672 ± 660 | 7214 ± 975 |
| 200015_s_at | NEDD5   | neural precursor cell expressed, develop. down-reg. 5        | 0.1540           | <b>-0.0053</b>    | 0.1331           | -0.0581           | <b>0.0533</b> | 3651 ± 234 | 4068 ± 399 | 4858 ± 186 | 4633 ± 458 |
| 219396_s_at | NEIL1   | nei endonuclease VIII-like 1                                 | <b>0.0301</b>    | -0.1547           | -0.1070          | 0.3798            | 0.2915        | 331 ± 47   | 336 ± 78   | 402 ± 30   | 476 ± 77   |
| 213328_at   | NEK1    | NIMA -related kinase 1                                       | <b>0.0326</b>    | -0.1439           | 0.1019           | -0.0865           | 0.0632        | 210 ± 28   | 296 ± 30   | 301 ± 21   | 281 ± 27   |
| 212530_at   | NEK7    | NIMA -related kinase 7                                       | 0.0951           | <b>-0.0165</b>    | 0.3140           | <b>-0.0241</b>    | 0.2232        | 1295 ± 132 | 1424 ± 170 | 1790 ± 261 | 1687 ± 165 |
| 212299_at   | NEK9    | NIMA -related kinase 9                                       | <b>0.0231</b>    | <b>-0.0037</b>    | -0.0972          | -0.0904           | 0.1022        | 671 ± 58   | 704 ± 101  | 796 ± 65   | 933 ± 87   |
| 206948_at   | NEU3    | sialidase 3                                                  | <b>0.0481</b>    | -0.0903           | -0.3657          | 0.3676            | <b>0.0150</b> | 204 ± 11   | 200 ± 28   | 165 ± 25   | 316 ± 55   |
| 214799_at   | NFASC   | neurofascin                                                  | <b>0.0403</b>    | <b>-0.0143</b>    | 0.2598           | -0.2121           | 0.0612        | 927 ± 155  | 1373 ± 236 | 1897 ± 324 | 1733 ± 352 |
| 211105_s_at | NFATC1  | nuclear factor of activated T-cells, cytoplasmic, CaN-dep. 1 | <b>0.0244</b>    | <b>-0.0010</b>    | -0.4702          | -0.4771           | <b>0.0178</b> | 284 ± 29   | 294 ± 39   | 316 ± 25   | 502 ± 93   |
| 207416_s_at | NFATC3  | nuclear factor of activated T-cells, cytoplasmic, CaN-dep 3  | 0.2278           | <b>-0.0205</b>    | 0.4054           | -0.4599           | 0.1522        | 159 ± 20   | 168 ± 24   | 209 ± 28   | 225 ± 10   |
| 200758_s_at | NFE2L1  | nuclear factor -like 1                                       | <b>0.0050</b>    | -0.1564           | 0.4897           | -0.1971           | 0.1493        | 2024 ± 97  | 2188 ± 57  | 2612 ± 102 | 2300 ± 337 |
| 200759_x_at | NFE2L1  | nuclear factor -like 1                                       | <b>0.0002</b>    | <b>-0.0083</b>    | -0.1371          | 0.1569            | <b>0.0449</b> | 3717 ± 135 | 3695 ± 357 | 4159 ± 99  | 4798 ± 473 |
| 214179_s_at | NFE2L1  | nuclear factor -like 1                                       | <b>0.0090</b>    | <b>-0.0089</b>    | -0.3975          | 0.1002            | <b>0.0276</b> | 2155 ± 138 | 2002 ± 130 | 2237 ± 152 | 2870 ± 323 |
| 204702_s_at | NFE2L3  | nuclear factor -like 3                                       | 0.0981           | <b>-0.0338</b>    | 0.1887           | -0.2065           | <b>0.0478</b> | 81 ± 10    | 101 ± 8    | 95 ± 9     | 136 ± 22   |
| 209289_at   | NFIB    | nuclear factor I/B                                           | 0.0751           | <b>-0.0266</b>    | 0.1744           | 0.3378            | 0.1231        | 2449 ± 153 | 2587 ± 188 | 2843 ± 141 | 3078 ± 286 |

| Probe set   | Name   | Description                                                        | NFT <sub>0</sub> | MMSE <sub>0</sub> | NFT <sub>1</sub> | MMSE <sub>1</sub> | ANOVA         | Control    | Incipient  | Moderate   | Severe     |
|-------------|--------|--------------------------------------------------------------------|------------------|-------------------|------------------|-------------------|---------------|------------|------------|------------|------------|
| 209290_s_at | NFIB   | nuclear factor I/B                                                 | 0.2873           | <b>-0.0407</b>    | 0.2379           | -0.2492           | 0.1876        | 2753 ± 184 | 2756 ± 170 | 3347 ± 213 | 3249 ± 383 |
| 206929_s_at | NFIC   | nuclear factor I/C                                                 | 0.2432           | <b>-0.0376</b>    | 0.2118           | <b>-0.0474</b>    | 0.2191        | 318 ± 39   | 342 ± 32   | 352 ± 34   | 449 ± 68   |
| 213298_at   | NFIC   | nuclear factor I/C                                                 | <b>0.0026</b>    | <b>-0.0056</b>    | <b>0.0037</b>    | <b>-0.0541</b>    | <b>0.0127</b> | 126 ± 10   | 158 ± 14   | 180 ± 8    | 234 ± 40   |
| 209239_at   | NFKB1  | NF of kappa light polypeptide gene enhancer in B-cells 1           | <b>0.0219</b>    | -0.3815           | -0.3905          | -0.3749           | 0.6568        | 458 ± 33   | 500 ± 42   | 493 ± 36   | 532 ± 59   |
| 201502_s_at | NFKBIA | NF of kappa light polypep. gene enhancer in B-cells inhib., α      | <b>0.0057</b>    | <b>-0.0011</b>    | -0.2975          | -0.2235           | <b>0.0073</b> | 1776 ± 294 | 1999 ± 377 | 2682 ± 493 | 4203 ± 735 |
| 210268_at   | NFX1   | nuclear transcription factor, X-box binding 1                      | <b>0.0025</b>    | <b>-0.0222</b>    | 0.1403           | -0.0758           | 0.0635        | 76 ± 14    | 112 ± 21   | 143 ± 23   | 148 ± 25   |
| 202008_s_at | NID    | nidogen                                                            | 0.2302           | <b>-0.0339</b>    | 0.1322           | -0.1095           | <b>0.0045</b> | 133 ± 8    | 204 ± 23   | 142 ± 12   | 230 ± 32   |
| 215338_s_at | NKTR   | natural killer-tumor recognition sequence                          | <b>0.0129</b>    | -0.1353           | <b>0.0301</b>    | -0.2544           | <b>0.0117</b> | 181 ± 13   | 225 ± 27   | 292 ± 21   | 234 ± 28   |
| 217844_at   | NLI-IF | nuclear LIM interactor-interacting factor                          | <b>0.0141</b>    | <b>-0.0102</b>    | <b>0.0314</b>    | <b>-0.0301</b>    | <b>0.0436</b> | 630 ± 82   | 791 ± 83   | 1116 ± 90  | 1117 ± 258 |
| 205204_at   | NMB    | neuromedin B                                                       | <b>0.0007</b>    | <b>-0.0059</b>    | <b>0.0169</b>    | 0.4550            | <b>0.0383</b> | 432 ± 33   | 482 ± 62   | 492 ± 42   | 737 ± 139  |
| 204862_s_at | NME3   | non-metastatic cells 3, protein expressed in                       | <b>0.0016</b>    | <b>-0.0005</b>    | 0.4648           | -0.1352           | <b>0.0022</b> | 548 ± 38   | 582 ± 72   | 612 ± 22   | 914 ± 109  |
| 212739_s_at | NME4   | non-metastatic cells 4, protein expressed in                       | <b>0.0080</b>    | <b>-0.0083</b>    | 0.0959           | -0.2639           | <b>0.0036</b> | 750 ± 43   | 692 ± 72   | 1036 ± 68  | 952 ± 85   |
| 202237_at   | NNMT   | nicotinamide N-methyltransferase                                   | 0.0773           | <b>-0.0235</b>    | -0.2385          | 0.1065            | <b>0.0010</b> | 201 ± 27   | 89 ± 20    | 147 ± 22   | 306 ± 48   |
| 214427_at   | NOL1   | nucleolar protein 1, 120kDa                                        | <b>0.0218</b>    | -0.2247           | -0.1073          | 0.2250            | 0.3489        | 850 ± 66   | 796 ± 116  | 868 ± 80   | 1053 ± 143 |
| 200874_s_at | NOL5A  | nucleolar protein 5A                                               | <b>0.0194</b>    | <b>-0.0054</b>    | <b>-0.0087</b>   | 0.0914            | <b>0.0318</b> | 305 ± 13   | 272 ± 7    | 349 ± 38   | 399 ± 37   |
| 205895_s_at | NOLC1  | nucleolar and coiled-body phosphoprotein 1                         | <b>0.0422</b>    | -0.1171           | 0.3146           | -0.4466           | 0.5031        | 258 ± 22   | 263 ± 25   | 276 ± 25   | 306 ± 22   |
| 200057_s_at | NONO   | non-POU domain containing, octamer-binding                         | <b>0.0360</b>    | <b>-0.0029</b>    | -0.4987          | <b>-0.0379</b>    | <b>0.0445</b> | 3672 ± 99  | 3873 ± 104 | 4017 ± 165 | 4172 ± 110 |
| 217950_at   | NOSIP  | eNOS interacting protein                                           | <b>0.0205</b>    | -0.1487           | -0.1308          | 0.0772            | 0.4777        | 502 ± 41   | 484 ± 26   | 553 ± 62   | 605 ± 88   |
| 205247_at   | NOTCH4 | Notch homolog 4                                                    | 0.1144           | <b>-0.0163</b>    | <b>0.0329</b>    | 0.4330            | <b>0.0348</b> | 302 ± 17   | 360 ± 40   | 367 ± 28   | 474 ± 62   |
| 220316_at   | NPAS3  | basic-helix-loop-helix-PAS protein                                 | 0.0759           | <b>-0.0001</b>    | <b>0.0020</b>    | -0.1486           | <b>0.0011</b> | 427 ± 16   | 554 ± 44   | 617 ± 17   | 796 ± 108  |
| 202679_at   | NPC1   | Niemann-Pick disease, type C1                                      | -0.6334          | <b>-0.0085</b>    | -0.2478          | -0.3528           | 0.2017        | 1188 ± 120 | 1093 ± 103 | 1197 ± 118 | 1503 ± 168 |
| 214107_x_at | NPEPPS | aminopeptidase puromycin sensitive                                 | 0.3775           | <b>-0.0290</b>    | -0.1239          | -0.2002           | 0.2578        | 517 ± 41   | 478 ± 62   | 549 ± 31   | 615 ± 42   |
| 215090_x_at | NPEPPS | aminopeptidase puromycin sensitive                                 | <b>0.0244</b>    | <b>-0.0310</b>    | -0.0994          | -0.2947           | 0.2896        | 681 ± 46   | 704 ± 75   | 761 ± 48   | 822 ± 51   |
| 217041_at   | NPTXR  | neuronal pentraxin receptor                                        | 0.9277           | <b>-0.0482</b>    | -0.2217          | -0.4873           | 0.3205        | 208 ± 20   | 207 ± 21   | 238 ± 18   | 273 ± 47   |
| 201468_s_at | NQO1   | NADH dehydrogenase, quinone 1                                      | 0.4670           | <b>-0.0390</b>    | 0.1347           | 0.0782            | 0.1421        | 496 ± 64   | 397 ± 40   | 503 ± 67   | 655 ± 86   |
| 31637_s_at  | NR1D1  | nuclear receptor subfamily 1, group D, member 1                    | <b>0.0110</b>    | -0.4674           | -0.3669          | 0.4310            | 0.4949        | 2771 ± 256 | 3307 ± 583 | 2925 ± 490 | 3686 ± 491 |
| 209506_s_at | NR2F1  | nuclear receptor subfamily 2, group F, member 1                    | <b>0.0289</b>    | -0.2429           | 0.1921           | -0.0775           | 0.8210        | 542 ± 23   | 568 ± 23   | 596 ± 54   | 619 ± 106  |
| 209262_s_at | NR2F6  | nuclear receptor subfamily 2, group F, member 6                    | <b>0.0482</b>    | -0.0951           | -0.4242          | <b>0.0542</b>     | 0.0882        | 436 ± 32   | 408 ± 63   | 418 ± 32   | 613 ± 98   |
| 216979_at   | NR4A3  | nuclear receptor subfamily 4, group A, member 3                    | 0.2152           | <b>-0.0037</b>    | <b>0.0524</b>    | -0.2079           | <b>0.0265</b> | 86 ± 7     | 88 ± 12    | 104 ± 12   | 150 ± 26   |
| 214632_at   | NRP2   | neuropilin 2                                                       | <b>0.0498</b>    | -0.0981           | -0.1788          | -0.4201           | 0.1182        | 127 ± 14   | 86 ± 17    | 120 ± 12   | 145 ± 21   |
| 209982_s_at | NRXN2  | neurexin 2                                                         | <b>0.0111</b>    | -0.2299           | -0.4993          | -0.3509           | 0.2346        | 488 ± 41   | 542 ± 54   | 605 ± 48   | 677 ± 108  |
| 203718_at   | NTE    | neuropathy target esterase                                         | <b>0.0077</b>    | -0.7111           | 0.4995           | -0.4016           | 0.9043        | 1308 ± 102 | 1387 ± 157 | 1466 ± 187 | 1459 ± 259 |
| 217033_x_at | NTRK3  | neurotrophic tyrosine kinase, receptor, type 3                     | <b>0.0020</b>    | -0.0579           | 0.1423           | 0.4117            | 0.0866        | 806 ± 38   | 897 ± 106  | 1029 ± 81  | 1098 ± 102 |
| 222027_at   | NUCKS  | similar to rat nuclear ubiquitous casein kinase 2                  | <b>0.0064</b>    | <b>-0.0546</b>    | 0.1786           | -0.2575           | 0.1422        | 287 ± 34   | 298 ± 36   | 309 ± 24   | 473 ± 120  |
| 217802_s_at | NUCKS  | similar to rat nuclear ubiquitous casein kinase 2                  | <b>0.0001</b>    | <b>-0.0002</b>    | <b>0.0099</b>    | -0.1530           | <b>0.0013</b> | 4406 ± 107 | 4549 ± 104 | 5193 ± 244 | 5660 ± 313 |
| 210574_s_at | NUDC   | nuclear distribution gene C homolog                                | <b>0.0143</b>    | -0.6804           | 0.4860           | 0.3653            | 0.4315        | 1192 ± 56  | 1181 ± 70  | 1343 ± 67  | 1201 ± 118 |
| 218414_s_at | NUDE1  | LIS1-interacting protein NUDE1, rat homolog                        | <b>0.0039</b>    | <b>-0.0333</b>    | 0.2772           | 0.4052            | 0.1041        | 667 ± 108  | 780 ± 187  | 994 ± 161  | 1401 ± 366 |
| 205134_s_at | NUFIP1 | nuclear fragile X mental retardation protein interacting protein 1 | <b>0.0340</b>    | <b>-0.0085</b>    | 0.0947           | -0.2330           | <b>0.0225</b> | 252 ± 20   | 252 ± 11   | 353 ± 36   | 372 ± 50   |
| 200747_s_at | NUMA1  | nuclear mitotic apparatus protein 1                                | <b>0.0008</b>    | <b>-0.0052</b>    | 0.2004           | <b>-0.0377</b>    | <b>0.0547</b> | 740 ± 72   | 879 ± 74   | 987 ± 66   | 1133 ± 170 |
| 207545_s_at | NUMB   | numb homolog                                                       | 0.3200           | <b>-0.0075</b>    | 0.2505           | <b>-0.0534</b>    | <b>0.0465</b> | 120 ± 8    | 119 ± 17   | 168 ± 17   | 167 ± 20   |
| 212709_at   | NUP160 | nucleoporin 160kDa                                                 | <b>0.0067</b>    | <b>-0.0001</b>    | 0.4503           | -0.0642           | <b>0.0004</b> | 151 ± 11   | 185 ± 12   | 213 ± 16   | 245 ± 11   |
| 202155_s_at | NUP214 | nucleoporin 214kDa                                                 | <b>0.0128</b>    | <b>-0.0011</b>    | -0.4361          | -0.0709           | <b>0.0094</b> | 390 ± 24   | 401 ± 44   | 445 ± 20   | 536 ± 33   |

| Probe set   | Name         | Description                                               | NFT <sub>0</sub> | MMSE <sub>0</sub> | NFT <sub>1</sub> | MMSE <sub>1</sub> | ANOVA         | Control    | Incipient  | Moderate   | Severe      |
|-------------|--------------|-----------------------------------------------------------|------------------|-------------------|------------------|-------------------|---------------|------------|------------|------------|-------------|
| 219007_at   | Nup43        | nucleoporin Nup43                                         | 0.0636           | <b>-0.0199</b>    | 0.1865           | -0.3225           | 0.0635        | 539 ± 55   | 572 ± 39   | 710 ± 47   | 738 ± 92    |
| 203195_s_at | NUP98        | nucleoporin 98kDa                                         | <b>0.0044</b>    | <b>-0.0001</b>    | 0.1507           | <b>-0.0104</b>    | <b>0.0000</b> | 97 ± 10    | 154 ± 25   | 250 ± 12   | 233 ± 27    |
| 210793_s_at | NUP98        | nucleoporin 98kDa                                         | <b>0.0410</b>    | <b>-0.0031</b>    | 0.1170           | <b>-0.0122</b>    | 0.0780        | 229 ± 15   | 256 ± 24   | 278 ± 13   | 291 ± 19    |
| 221684_s_at | NYX          | nyctalopin                                                | <b>0.0154</b>    | -0.0634           | 0.0984           | -0.2008           | 0.1515        | 98 ± 14    | 117 ± 10   | 125 ± 9    | 180 ± 48    |
| 205660_at   | OASL         | 2'-5'-oligoadenylate synthetase-like                      | 0.6803           | <b>-0.0071</b>    | 0.1457           | -0.0822           | 0.0815        | 263 ± 27   | 299 ± 26   | 287 ± 21   | 382 ± 51    |
| 210797_s_at | OASL         | 2'-5'-oligoadenylate synthetase-like                      | 0.3167           | <b>-0.0139</b>    | 0.1112           | <b>-0.0072</b>    | 0.1729        | 282 ± 34   | 335 ± 19   | 332 ± 25   | 399 ± 55    |
| 200790_at   | ODC1         | ornithine decarboxylase 1                                 | 0.1019           | <b>-0.0166</b>    | 0.4136           | -0.3532           | <b>0.0544</b> | 948 ± 48   | 879 ± 53   | 864 ± 35   | 1217 ± 176  |
| 203569_s_at | OFD1         | oral-facial-digital syndrome 1                            | <b>0.0071</b>    | <b>-0.0015</b>    | -0.3908          | -0.1424           | <b>0.0326</b> | 1060 ± 101 | 1179 ± 94  | 1411 ± 124 | 1546 ± 159  |
| 201282_at   | OGDH         | oxoglutarate dehydrogenase                                | <b>0.0460</b>    | -0.9567           | -0.2534          | 0.3984            | <b>0.0340</b> | 622 ± 72   | 623 ± 88   | 924 ± 73   | 586 ± 118   |
| 205301_s_at | OGG1         | 8-oxoguanine DNA glycosylase                              | 0.1250           | <b>-0.0181</b>    | 0.1970           | <b>-0.0363</b>    | 0.0777        | 57 ± 7     | 71 ± 7     | 108 ± 20   | 103 ± 22    |
| 205760_s_at | OGG1         | 8-oxoguanine DNA glycosylase                              | <b>0.0016</b>    | <b>-0.0030</b>    | 0.2250           | -0.1113           | <b>0.0319</b> | 480 ± 47   | 532 ± 65   | 629 ± 70   | 843 ± 148   |
| 215136_s_at | OIP2         | Opa-interacting protein 2                                 | <b>0.0322</b>    | <b>-0.0077</b>    | 0.0628           | -0.1313           | <b>0.0200</b> | 267 ± 10   | 355 ± 36   | 334 ± 22   | 419 ± 50    |
| 206323_x_at | OPHN1        | oligophrenin 1                                            | <b>0.0084</b>    | <b>-0.0069</b>    | 0.1390           | -0.3364           | <b>0.0301</b> | 2393 ± 277 | 2949 ± 391 | 3096 ± 78  | 4482 ± 876  |
| 221460_at   | OR2C1        | olfactory receptor, family 2, subfamily C, member 1       | <b>0.0335</b>    | <b>-0.0144</b>    | -0.4954          | 0.3644            | 0.0770        | 283 ± 40   | 259 ± 21   | 322 ± 47   | 468 ± 94    |
| 215770_at   | OR7E2P       | olfactory receptor, 7E2 pseudogene                        | 0.5560           | <b>-0.0046</b>    | -0.0931          | 0.2537            | <b>0.0094</b> | 45 ± 6     | 30 ± 6     | 42 ± 13    | 86 ± 15     |
| 207408_at   | ORCTL4       | organic cationic transporter-like 4                       | <b>0.0328</b>    | <b>-0.0158</b>    | <b>-0.0380</b>   | 0.3543            | <b>0.0312</b> | 350 ± 25   | 337 ± 23   | 365 ± 30   | 506 ± 72    |
| 208735_s_at | OS4          | conserved gene amplified in osteosarcoma                  | <b>0.0542</b>    | <b>-0.0290</b>    | <b>0.0126</b>    | 0.3074            | 0.0849        | 450 ± 25   | 483 ± 60   | 496 ± 27   | 609 ± 61    |
| 203445_s_at | OS4          | conserved gene amplified in osteosarcoma                  | <b>0.0343</b>    | <b>-0.0077</b>    | 0.4949           | 0.3445            | 0.0991        | 2495 ± 230 | 2660 ± 291 | 3025 ± 231 | 3476 ± 393  |
| 215399_s_at | OS-9         | amplified in osteosarcoma                                 | <b>0.0037</b>    | -0.4339           | <b>0.0377</b>    | 0.2597            | 0.4182        | 355 ± 24   | 395 ± 47   | 437 ± 20   | 415 ± 56    |
| 218304_s_at | OSBPL11      | oxysterol binding protein-like 11                         | 0.2868           | <b>-0.0153</b>    | -0.3162          | <b>-0.0412</b>    | 0.2455        | 704 ± 69   | 837 ± 129  | 961 ± 110  | 993 ± 146   |
| 213039_at   | P114-RHO-GEF | Rho-specific guanine nucleotide exchange factor p114      | 0.1011           | <b>-0.0312</b>    | -0.4892          | <b>0.0337</b>     | 0.0606        | 1073 ± 35  | 1126 ± 163 | 1129 ± 81  | 1493 ± 150  |
| 202553_s_at | P29          | GCIP-interacting protein p29                              | <b>0.0025</b>    | -0.0574           | 0.1144           | <b>-0.0131</b>    | <b>0.0550</b> | 998 ± 90   | 1164 ± 72  | 1308 ± 75  | 1189 ± 68   |
| 220408_x_at | P38IP        | transcription factor                                      | 0.0884           | <b>-0.0190</b>    | -0.4874          | -0.3214           | <b>0.0123</b> | 743 ± 68   | 763 ± 99   | 729 ± 49   | 1063 ± 44   |
| 220402_at   | P53AIP1      | p53-regulated apoptosis-inducing protein 1                | 0.0912           | <b>-0.0004</b>    | 0.0885           | <b>-0.0401</b>    | <b>0.0000</b> | 47 ± 9     | 57 ± 7     | 43 ± 8     | 125 ± 16    |
| 204064_at   | P84          | nuclear matrix protein p84                                | <b>0.0263</b>    | -0.1264           | -0.2149          | 0.4118            | 0.1330        | 917 ± 91   | 917 ± 73   | 1180 ± 78  | 1041 ± 109  |
| 212220_at   | PA200        | proteasome activator 200 kDa                              | <b>0.0035</b>    | -0.0876           | <b>0.0521</b>    | -0.2996           | 0.3204        | 77 ± 6     | 87 ± 16    | 105 ± 13   | 124 ± 34    |
| 215157_x_at | PABPC1       | poly binding protein, cytoplasmic 1                       | <b>0.0234</b>    | <b>-0.0318</b>    | 0.1606           | <b>-0.0525</b>    | 0.1582        | 3495 ± 151 | 3731 ± 242 | 4100 ± 273 | 4097 ± 223  |
| 208113_x_at | PABPC3       | poly binding protein, cytoplasmic 3                       | <b>0.0287</b>    | -0.1967           | <b>0.0357</b>    | -0.0759           | 0.3436        | 2272 ± 174 | 2625 ± 405 | 2907 ± 234 | 2622 ± 145  |
| 201544_x_at | PABPN1       | poly binding protein, nuclear 1                           | <b>0.0050</b>    | -0.1873           | 0.4933           | 0.1838            | 0.2529        | 4230 ± 288 | 4405 ± 488 | 4544 ± 448 | 5912 ± 1094 |
| 201651_s_at | PACSN2       | protein kinase C and casein kinase substrate in neurons 2 | 0.1415           | <b>-0.0026</b>    | -0.1714          | <b>0.0380</b>     | <b>0.0176</b> | 2223 ± 156 | 1874 ± 170 | 2533 ± 133 | 3396 ± 579  |
| 205719_s_at | PAH          | phenylalanine hydroxylase                                 | 0.4106           | <b>-0.0367</b>    | 0.1758           | <b>-0.0028</b>    | 0.3914        | 99 ± 13    | 120 ± 18   | 121 ± 8    | 128 ± 6     |
| 208878_s_at | PAK2         | p21-activated kinase 2                                    | 0.4320           | <b>-0.0374</b>    | 0.3637           | -0.0987           | 0.1148        | 305 ± 24   | 363 ± 38   | 311 ± 18   | 408 ± 47    |
| 33814_at    | PAK4         | p21-activated kinase 4                                    | <b>0.0089</b>    | <b>-0.0114</b>    | 0.1352           | <b>-0.0533</b>    | 0.0807        | 600 ± 39   | 625 ± 41   | 722 ± 44   | 847 ± 128   |
| 205815_at   | PAP          | pancreatitis-associated protein                           | 0.0883           | <b>-0.0061</b>    | 0.0663           | -0.2791           | <b>0.0332</b> | 130 ± 10   | 171 ± 16   | 156 ± 13   | 221 ± 36    |
| 221527_s_at | PARD3        | par-3 partitioning defective 3 homolog                    | <b>0.0117</b>    | <b>-0.0031</b>    | 0.3044           | -0.4089           | <b>0.0163</b> | 390 ± 40   | 350 ± 29   | 543 ± 60   | 563 ± 64    |
| 204004_at   | PAWR         | PRKC, apoptosis, WT1, regulator                           | 0.2839           | <b>-0.0029</b>    | -0.2074          | -0.0971           | 0.0977        | 274 ± 32   | 279 ± 33   | 330 ± 27   | 376 ± 32    |
| 205646_s_at | PAX6         | paired box gene 6                                         | <b>0.0003</b>    | <b>0.0000</b>     | 0.2655           | -0.1912           | <b>0.0024</b> | 1018 ± 115 | 1011 ± 98  | 1441 ± 189 | 2040 ± 299  |
| 220355_s_at | PB1          | polybromo 1                                               | <b>0.0209</b>    | <b>-0.0348</b>    | <b>0.0362</b>    | <b>-0.0008</b>    | <b>0.0027</b> | 563 ± 20   | 639 ± 38   | 746 ± 32   | 650 ± 34    |
| 217739_s_at | PBEF         | pre-B-cell colony-enhancing factor                        | 0.5430           | <b>-0.0205</b>    | 0.3250           | <b>-0.0138</b>    | 0.2467        | 371 ± 34   | 411 ± 44   | 489 ± 58   | 499 ± 65    |
| 211097_s_at | PBX2         | pre-B-cell leukemia transcription factor 2                | <b>0.0481</b>    | <b>-0.0013</b>    | -0.4044          | 0.3876            | <b>0.0127</b> | 164 ± 11   | 143 ± 18   | 197 ± 14   | 225 ± 24    |
| 204476_s_at | PC           | pyruvate carboxylase                                      | <b>0.0001</b>    | <b>-0.0409</b>    | <b>0.0223</b>    | -0.4650           | 0.1148        | 501 ± 40   | 596 ± 65   | 695 ± 67   | 713 ± 92    |
| 203845_at   | PCAF         | p300/CBP-associated factor                                | 0.6531           | <b>-0.0359</b>    | 0.3825           | <b>-0.0295</b>    | <b>0.0263</b> | 1312 ± 103 | 1521 ± 167 | 2028 ± 200 | 1671 ± 164  |

| Probe set   | Name            | Description                                               | NFT <sub>0</sub> | MMSE <sub>0</sub> | NFT <sub>1</sub> | MMSE <sub>1</sub> | ANOVA         | Control    | Incipient   | Moderate    | Severe      |
|-------------|-----------------|-----------------------------------------------------------|------------------|-------------------|------------------|-------------------|---------------|------------|-------------|-------------|-------------|
| 217049_x_at | PCDH11Y         | protocadherin 11 Y-linked                                 | 0.1777           | <b>-0.0450</b>    | <b>0.0483</b>    | <b>-0.0071</b>    | 0.0645        | 112 ± 8    | 141 ± 21    | 125 ± 20    | 198 ± 36    |
| 205656_at   | PCDH17          | protocadherin 17                                          | <b>0.0178</b>    | -0.1013           | 0.0796           | -0.4762           | 0.2160        | 2305 ± 195 | 2450 ± 219  | 2921 ± 243  | 2876 ± 341  |
| 219738_s_at | PCDH9           | protocadherin 9                                           | 0.0769           | <b>-0.0190</b>    | 0.4993           | -0.1118           | 0.1086        | 2250 ± 176 | 2345 ± 232  | 2846 ± 206  | 2706 ± 160  |
| 214937_x_at | PCM1            | pericentriolar material 1                                 | <b>0.0260</b>    | -0.2095           | -0.2338          | -0.1556           | 0.0725        | 1098 ± 66  | 1064 ± 91   | 1350 ± 70   | 1155 ± 99   |
| 214118_x_at | PCM1            | pericentriolar material 1                                 | 0.0943           | <b>-0.0377</b>    | <b>-0.0541</b>   | 0.3889            | 0.1044        | 1313 ± 127 | 1299 ± 70   | 1282 ± 85   | 1636 ± 130  |
| 201933_at   | PCOLN3          | procollagen N-endopeptidase                               | <b>0.0036</b>    | -0.6778           | 0.4751           | 0.4852            | 0.3157        | 580 ± 36   | 520 ± 68    | 708 ± 59    | 586 ± 115   |
| 205559_s_at | PCSK5           | proprotein convertase subtilisin/kexin type 5             | <b>0.0025</b>    | <b>-0.0129</b>    | -0.0647          | 0.3272            | <b>0.0039</b> | 180 ± 23   | 127 ± 17    | 238 ± 24    | 247 ± 25    |
| 212594_at   | PDCD4           | programmed cell death 4                                   | <b>0.0001</b>    | <b>-0.0014</b>    | <b>0.0070</b>    | <b>-0.0142</b>    | <b>0.0029</b> | 174 ± 14   | 234 ± 16    | 313 ± 33    | 296 ± 36    |
| 212593_s_at | PDCD4           | programmed cell death 4                                   | <b>0.0048</b>    | <b>-0.0093</b>    | 0.4099           | <b>-0.0001</b>    | <b>0.0016</b> | 674 ± 59   | 872 ± 116   | 1342 ± 16   | 1022 ± 179  |
| 204449_at   | PDCL            | phosducin-like                                            | <b>0.0431</b>    | -0.3051           | <b>0.0069</b>    | <b>-0.0113</b>    | <b>0.0421</b> | 175 ± 21   | 204 ± 11    | 271 ± 28    | 204 ± 28    |
| 206388_at   | PDE3A           | phosphodiesterase 3A, cGMP-inhibited                      | <b>0.0009</b>    | <b>-0.0029</b>    | 0.0846           | -0.1842           | <b>0.0257</b> | 133 ± 8    | 141 ± 16    | 165 ± 26    | 234 ± 36    |
| 206792_x_at | PDE4C           | phosphodiesterase 4C, cAMP-specific                       | <b>0.0069</b>    | <b>-0.0180</b>    | <b>0.0220</b>    | -0.1432           | <b>0.0466</b> | 4935 ± 632 | 5755 ± 1121 | 5049 ± 1345 | 8316 ± 1212 |
| 210837_s_at | PDE4D           | phosphodiesterase 4D, cAMP-specific                       | <b>0.0031</b>    | <b>-0.0055</b>    | 0.2113           | -0.4434           | <b>0.0044</b> | 56 ± 6     | 57 ± 15     | 61 ± 10     | 127 ± 23    |
| 210836_x_at | PDE4D           | phosphodiesterase 4D, cAMP-specific                       | <b>0.0374</b>    | <b>-0.0457</b>    | <b>-0.0044</b>   | 0.4461            | 0.0851        | 108 ± 13   | 79 ± 17     | 106 ± 11    | 153 ± 31    |
| 216061_x_at | PDGFB           | platelet-derived growth factor beta polypeptide           | 0.1198           | <b>-0.0065</b>    | <b>0.0075</b>    | <b>-0.0086</b>    | 0.1059        | 376 ± 20   | 423 ± 60    | 550 ± 46    | 531 ± 96    |
| 202273_at   | PDGFRB          | platelet-derived growth factor receptor, beta polypeptide | <b>0.0221</b>    | -0.0721           | 0.1187           | -0.1005           | 0.0688        | 242 ± 26   | 334 ± 48    | 345 ± 24    | 346 ± 31    |
| 205137_x_at | PDZ-73/NY-CO-38 | PDZ-73 protein                                            | <b>0.0449</b>    | <b>0.0000</b>     | 0.1158           | <b>-0.0100</b>    | <b>0.0004</b> | 219 ± 34   | 300 ± 64    | 385 ± 32    | 565 ± 65    |
| 211184_s_at | PDZ-73/NY-CO-38 | PDZ-73 protein                                            | <b>0.0082</b>    | <b>-0.0031</b>    | 0.0585           | -0.2086           | <b>0.0460</b> | 275 ± 29   | 342 ± 61    | 368 ± 52    | 519 ± 91    |
| 208982_at   | PECAM1          | platelet/endothelial cell adhesion molecule               | <b>0.0355</b>    | <b>-0.0058</b>    | 0.4207           | -0.0699           | 0.1173        | 519 ± 62   | 516 ± 49    | 660 ± 76    | 719 ± 83    |
| 215354_s_at | PELP1           | proline and glutamic acid rich nuclear protein            | <b>0.0040</b>    | -0.0933           | 0.1963           | -0.1487           | 0.2547        | 296 ± 43   | 314 ± 47    | 413 ± 43    | 400 ± 69    |
| 214989_x_at | PEPP2           | phosphoinositol 3-phosphate-binding protein-2             | <b>0.0188</b>    | -0.0869           | 0.3103           | -0.1503           | 0.3509        | 965 ± 95   | 945 ± 109   | 1226 ± 203  | 1265 ± 200  |
| 202861_at   | PER1            | period homolog 1                                          | <b>0.0000</b>    | <b>-0.0099</b>    | 0.2052           | <b>-0.0479</b>    | <b>0.0365</b> | 271 ± 55   | 393 ± 44    | 479 ± 50    | 542 ± 107   |
| 36829_at    | PER1            | period homolog 1                                          | <b>0.0020</b>    | <b>-0.0105</b>    | 0.3087           | -0.2764           | <b>0.0267</b> | 894 ± 96   | 1094 ± 107  | 1102 ± 53   | 1405 ± 175  |
| 205251_at   | PER2            | period homolog 2                                          | <b>0.0146</b>    | <b>-0.0004</b>    | 0.1440           | -0.2737           | <b>0.0063</b> | 782 ± 65   | 883 ± 79    | 991 ± 63    | 1158 ± 71   |
| 213296_at   | PEX10           | peroxisome biogenesis factor 10                           | 0.2588           | <b>-0.0364</b>    | -0.1705          | 0.1926            | 0.0961        | 554 ± 44   | 576 ± 58    | 568 ± 32    | 709 ± 32    |
| 202464_s_at | PFKFB3          | 6-phosphofructo-2-kinase/fructose-2,6-biphosphatase 3     | 0.2420           | <b>-0.0098</b>    | -0.2468          | -0.2187           | 0.0817        | 1897 ± 261 | 1863 ± 98   | 2821 ± 385  | 2722 ± 459  |
| 205261_at   | PGC             | progastricin                                              | 0.1265           | <b>-0.0029</b>    | -0.0870          | 0.3083            | <b>0.0083</b> | 164 ± 6    | 155 ± 16    | 170 ± 16    | 291 ± 53    |
| 203501_at   | PGCP            | plasma glutamate carboxypeptidase                         | 0.4277           | <b>-0.0302</b>    | -0.1570          | <b>-0.0239</b>    | 0.2750        | 430 ± 57   | 513 ± 66    | 603 ± 76    | 556 ± 64    |
| 218388_at   | PGLS            | 6-phosphogluconolactonase                                 | <b>0.0156</b>    | -0.0720           | 0.2090           | 0.0703            | 0.1472        | 398 ± 41   | 418 ± 42    | 424 ± 51    | 573 ± 89    |
| 218387_s_at | PGLS            | 6-phosphogluconolactonase                                 | <b>0.0128</b>    | <b>-0.0074</b>    | <b>0.0406</b>    | 0.2988            | <b>0.0540</b> | 719 ± 96   | 803 ± 82    | 880 ± 93    | 1140 ± 147  |
| 203314_at   | PGPL            | Pseudoautosomal GTP-binding protein-like                  | <b>0.0237</b>    | <b>-0.0422</b>    | -0.2159          | -0.2081           | 0.1991        | 517 ± 48   | 492 ± 45    | 529 ± 36    | 652 ± 80    |
| 220558_x_at | PHEMX           | pan-hematopoietic expression                              | 0.6180           | <b>-0.0087</b>    | 0.4042           | -0.2646           | 0.0577        | 393 ± 35   | 369 ± 25    | 395 ± 46    | 572 ± 87    |
| 40446_at    | PHF1            | PHD finger protein 1                                      | <b>0.0197</b>    | <b>-0.0527</b>    | -0.4096          | -0.4306           | <b>0.0503</b> | 2651 ± 90  | 2777 ± 260  | 2681 ± 127  | 3481 ± 378  |
| 209439_s_at | PHKA2           | phosphorylase kinase, alpha 2                             | <b>0.0023</b>    | <b>-0.0017</b>    | -0.0864          | -0.3197           | <b>0.0079</b> | 306 ± 37   | 299 ± 17    | 408 ± 35    | 478 ± 55    |
| 218634_at   | PHLDA3          | pleckstrin homology-like domain, family A, member 3       | <b>0.0057</b>    | <b>-0.0113</b>    | 0.4370           | 0.2769            | <b>0.0290</b> | 709 ± 56   | 715 ± 78    | 804 ± 77    | 1052 ± 124  |
| 209345_s_at | PI4KII          | phosphatidylinositol 4-kinase type II                     | <b>0.0394</b>    | -0.1836           | <b>0.0255</b>    | -0.1561           | 0.4015        | 784 ± 53   | 835 ± 60    | 828 ± 52    | 913 ± 46    |
| 212881_at   | PIASY           | protein inhibitor of activated STAT protein PIASy         | <b>0.0076</b>    | <b>-0.0162</b>    | 0.1215           | 0.3572            | 0.0559        | 334 ± 30   | 417 ± 89    | 425 ± 42    | 598 ± 96    |
| 213239_at   | PIBF1           | progesterone-induced blocking factor 1                    | 0.1800           | <b>-0.0210</b>    | 0.3313           | <b>-0.0049</b>    | <b>0.0412</b> | 126 ± 6    | 140 ± 13    | 132 ± 14    | 192 ± 29    |
| 200704_at   | PIG7            | LPS-induced TNF-alpha factor                              | 0.4490           | <b>-0.0187</b>    | 0.4384           | -0.3985           | 0.1091        | 998 ± 126  | 909 ± 107   | 1141 ± 164  | 1394 ± 49   |
| 200706_s_at | PIG7            | LPS-induced TNF-alpha factor                              | 0.5757           | <b>-0.0387</b>    | 0.1702           | -0.1734           | 0.1294        | 664 ± 83   | 870 ± 122   | 926 ± 36    | 935 ± 112   |
| 205281_s_at | PIGA            | phosphatidylinositol glycan, class A                      | 0.4475           | <b>-0.0485</b>    | -0.3049          | -0.4006           | 0.3726        | 276 ± 26   | 275 ± 19    | 332 ± 30    | 320 ± 35    |
| 204484_at   | PIK3C2B         | phosphoinositide-3-kinase, class 2, beta polypeptide      | <b>0.0152</b>    | <b>-0.0073</b>    | -0.0821          | 0.1709            | <b>0.0169</b> | 778 ± 57   | 744 ± 122   | 978 ± 107   | 1382 ± 241  |

| Probe set   | Name    | Description                                                | NFT <sub>0</sub> | MMSE <sub>0</sub> | NFT <sub>1</sub> | MMSE <sub>1</sub> | ANOVA         | Control    | Incipient  | Moderate   | Severe     |
|-------------|---------|------------------------------------------------------------|------------------|-------------------|------------------|-------------------|---------------|------------|------------|------------|------------|
| 204297_at   | PIK3C3  | phosphoinositide-3-kinase, class 3                         | 0.0844           | <b>-0.0010</b>    | 0.1369           | -0.4447           | <b>0.0123</b> | 321 ± 17   | 365 ± 31   | 362 ± 35   | 467 ± 35   |
| 206138_s_at | PIK4CB  | phosphatidylinositol 4-kinase, catalytic, beta polypeptide | <b>0.0327</b>    | <b>-0.0035</b>    | -0.1265          | <b>-0.0494</b>    | 0.1078        | 1331 ± 78  | 1291 ± 88  | 1500 ± 89  | 1585 ± 101 |
| 222218_s_at | PILR    | paired immunoglobulin-like receptor alpha                  | 0.1095           | <b>-0.0303</b>    | 0.2959           | -0.2963           | 0.1310        | 148 ± 21   | 181 ± 22   | 170 ± 17   | 214 ± 13   |
| 209193_at   | PIM1    | pim-1 oncogene                                             | 0.1210           | <b>-0.0054</b>    | -0.0846          | -0.4711           | 0.0680        | 416 ± 66   | 362 ± 36   | 476 ± 62   | 594 ± 55   |
| 214224_s_at | PIN4    | protein NIMA-interacting, 4                                | 0.5067           | <b>-0.0190</b>    | 0.4797           | -0.3499           | <b>0.0511</b> | 474 ± 26   | 478 ± 19   | 481 ± 21   | 557 ± 18   |
| 214225_at   | PIN4    | protein NIMA-interacting, 4                                | <b>0.0466</b>    | <b>-0.0141</b>    | -0.3622          | -0.1424           | <b>0.0163</b> | 180 ± 21   | 193 ± 16   | 192 ± 6    | 276 ± 34   |
| 207391_s_at | PIP5K1A | phosphatidylinositol-4-phosphate 5-kinase, type I, alpha   | <b>0.0121</b>    | <b>-0.0010</b>    | 0.1322           | 0.4337            | <b>0.0020</b> | 724 ± 49   | 817 ± 53   | 821 ± 95   | 1264 ± 143 |
| 205570_at   | PIP5K2A | phosphatidylinositol-4-phosphate 5-kinase, type II, alpha  | <b>0.0308</b>    | <b>-0.0089</b>    | -0.1953          | -0.1431           | 0.1561        | 232 ± 26   | 234 ± 54   | 276 ± 24   | 346 ± 49   |
| 204146_at   | PIR51   | RAD51-interacting protein                                  | 0.0702           | <b>-0.0492</b>    | 0.4145           | 0.3550            | 0.1439        | 65 ± 6     | 55 ± 6     | 86 ± 14    | 104 ± 26   |
| 214682_at   | PKD1    | polycystic kidney disease 1                                | <b>0.0106</b>    | -0.3156           | -0.0832          | 0.4934            | 0.6342        | 166 ± 28   | 162 ± 33   | 212 ± 68   | 243 ± 62   |
| 202328_s_at | PKD1    | polycystic kidney disease 1                                | <b>0.0226</b>    | -0.8845           | -0.4643          | 0.1503            | 0.8066        | 875 ± 35   | 868 ± 106  | 932 ± 77   | 973 ± 114  |
| 38269_at    | PKD2    | protein kinase D2                                          | <b>0.0088</b>    | <b>-0.0229</b>    | 0.4274           | 0.2416            | 0.0702        | 603 ± 52   | 662 ± 96   | 667 ± 62   | 868 ± 72   |
| 206178_at   | PLA2G5  | phospholipase A2, group V                                  | <b>0.0199</b>    | -0.0741           | -0.2008          | 0.1190            | 0.2547        | 539 ± 61   | 498 ± 81   | 590 ± 98   | 781 ± 157  |
| 215938_s_at | PLA2G6  | phospholipase A2, group VI                                 | <b>0.0013</b>    | <b>-0.0435</b>    | 0.0710           | -0.0647           | 0.1377        | 288 ± 23   | 341 ± 25   | 381 ± 31   | 476 ± 114  |
| 211918_x_at | PLAC3   | placenta-specific 3                                        | <b>0.0228</b>    | <b>-0.0063</b>    | 0.0664           | -0.1455           | <b>0.0137</b> | 361 ± 30   | 428 ± 23   | 469 ± 50   | 644 ± 102  |
| 205372_at   | PLAG1   | pleiomorphic adenoma gene 1                                | 0.0731           | <b>-0.0015</b>    | <b>0.0333</b>    | 0.2767            | <b>0.0049</b> | 132 ± 13   | 121 ± 7    | 168 ± 20   | 209 ± 19   |
| 207943_x_at | PLAGL1  | pleiomorphic adenoma gene-like 1                           | 0.0851           | <b>-0.0128</b>    | -0.0981          | 0.4084            | <b>0.0156</b> | 275 ± 24   | 230 ± 25   | 310 ± 21   | 334 ± 9    |
| 202925_s_at | PLAGL2  | pleiomorphic adenoma gene-like 2                           | <b>0.0075</b>    | <b>-0.0098</b>    | 0.4766           | -0.2048           | 0.0607        | 311 ± 25   | 327 ± 24   | 394 ± 15   | 405 ± 44   |
| 205111_s_at | PLCE1   | phospholipase C, epsilon 1                                 | <b>0.0043</b>    | <b>-0.0439</b>    | 0.1239           | -0.3028           | <b>0.0336</b> | 226 ± 20   | 286 ± 38   | 363 ± 46   | 343 ± 33   |
| 204613_at   | PLCG2   | phospholipase C, gamma 2                                   | 0.1598           | <b>-0.0270</b>    | 0.3807           | 0.4970            | <b>0.0522</b> | 305 ± 30   | 344 ± 58   | 301 ± 43   | 497 ± 77   |
| 205934_at   | PLCL1   | phospholipase C-like 1                                     | 0.5862           | <b>-0.0210</b>    | -0.4694          | -0.4231           | 0.2556        | 405 ± 48   | 419 ± 75   | 469 ± 91   | 594 ± 64   |
| 209643_s_at | PLD2    | phospholipase D2                                           | <b>0.0072</b>    | <b>-0.0018</b>    | <b>0.0324</b>    | <b>-0.0437</b>    | <b>0.0098</b> | 332 ± 26   | 417 ± 33   | 506 ± 40   | 540 ± 73   |
| 201373_at   | PLEC1   | plectin 1, intermediate filament binding protein 500kDa    | <b>0.0168</b>    | <b>-0.0225</b>    | -0.0787          | -0.4002           | 0.1725        | 406 ± 48   | 421 ± 17   | 522 ± 46   | 606 ± 123  |
| 214415_at   | PLGL    | plasminogen-like                                           | <b>0.0392</b>    | -0.2956           | 0.1232           | -0.3677           | <b>0.0387</b> | 161 ± 19   | 214 ± 46   | 292 ± 25   | 219 ± 35   |
| 205871_at   | PLGL    | plasminogen-like                                           | 0.0840           | <b>-0.0107</b>    | <b>-0.0372</b>   | 0.4935            | <b>0.0519</b> | 151 ± 26   | 114 ± 20   | 192 ± 26   | 217 ± 28   |
| 200827_at   | PLOD    | procollagen-lysine, 2-oxoglutarate 5-dioxygenase           | 0.0550           | <b>-0.0284</b>    | <b>-0.0271</b>   | 0.2514            | 0.1692        | 409 ± 45   | 344 ± 12   | 422 ± 28   | 517 ± 89   |
| 202619_s_at | PLOD2   | procollagen-lysine, 2-oxoglutarate 5-dioxygenase 2         | 0.2114           | <b>-0.0253</b>    | -0.3160          | <b>-0.0328</b>    | 0.2518        | 251 ± 29   | 269 ± 40   | 267 ± 23   | 341 ± 39   |
| 202185_at   | PLOD3   | procollagen-lysine, 2-oxoglutarate 5-dioxygenase 3         | <b>0.0173</b>    | <b>-0.0080</b>    | -0.4297          | 0.4495            | 0.0720        | 1010 ± 117 | 1177 ± 152 | 1203 ± 94  | 1520 ± 152 |
| 56197_at    | PLSCR3  | phospholipid scramblase 3                                  | 0.1117           | <b>-0.0403</b>    | 0.2329           | 0.2967            | <b>0.0088</b> | 1539 ± 107 | 1647 ± 196 | 1389 ± 51  | 2309 ± 302 |
| 208890_s_at | PLXNB2  | plexin B2                                                  | <b>0.0023</b>    | <b>-0.0039</b>    | <b>0.0015</b>    | -0.1719           | <b>0.0193</b> | 557 ± 42   | 905 ± 169  | 1134 ± 148 | 1277 ± 242 |
| 211014_s_at | PML     | promyelocytic leukemia                                     | 0.1579           | <b>-0.0006</b>    | <b>0.0435</b>    | <b>-0.0359</b>    | <b>0.0090</b> | 323 ± 19   | 352 ± 20   | 353 ± 15   | 446 ± 39   |
| 209640_at   | PML     | promyelocytic leukemia                                     | 0.0579           | <b>-0.0070</b>    | <b>0.0245</b>    | <b>-0.0327</b>    | 0.0753        | 238 ± 12   | 267 ± 24   | 283 ± 23   | 359 ± 56   |
| 217226_s_at | PMX1    | paired mesoderm homeo box 1                                | <b>0.0137</b>    | -0.0925           | 0.3677           | -0.1337           | <b>0.0386</b> | 655 ± 61   | 745 ± 48   | 882 ± 51   | 797 ± 54   |
| 205991_s_at | PMX1    | paired mesoderm homeo box 1                                | <b>0.0076</b>    | <b>-0.0227</b>    | 0.2348           | -0.4575           | <b>0.0173</b> | 178 ± 19   | 227 ± 28   | 202 ± 15   | 285 ± 27   |
| 215281_x_at | POGZ    | pogo transposable element with ZNF domain                  | <b>0.0119</b>    | <b>-0.0094</b>    | -0.4953          | -0.2406           | 0.0773        | 217 ± 30   | 210 ± 41   | 314 ± 47   | 326 ± 35   |
| 219380_x_at | POLH    | polymerase , eta                                           | <b>0.0059</b>    | <b>-0.0235</b>    | <b>0.0199</b>    | <b>-0.0327</b>    | 0.1005        | 40 ± 8     | 51 ± 11    | 70 ± 17    | 89 ± 20    |
| 209302_at   | POLR2H  | polymerase II polypeptide H                                | <b>0.0180</b>    | -0.0630           | 0.3990           | 0.3664            | 0.2676        | 965 ± 56   | 957 ± 91   | 1036 ± 63  | 1147 ± 86  |
| 203782_s_at | POLRMT  | polymerase mitochondrial                                   | 0.1055           | <b>-0.0335</b>    | 0.3889           | <b>0.0304</b>     | <b>0.0295</b> | 864 ± 15   | 797 ± 25   | 837 ± 50   | 1000 ± 69  |
| 210910_s_at | POMZP3  | POM and ZP3 fusion                                         | <b>0.0001</b>    | <b>-0.0058</b>    | 0.2722           | 0.1599            | <b>0.0309</b> | 317 ± 38   | 321 ± 41   | 386 ± 53   | 512 ± 59   |
| 204148_s_at | POMZP3  | POM and ZP3 fusion                                         | <b>0.0079</b>    | <b>-0.0156</b>    | -0.4302          | 0.1304            | 0.0956        | 361 ± 47   | 335 ± 50   | 442 ± 80   | 538 ± 41   |
| 204839_at   | POP5    | RNase MRP/RNase P protein-like                             | 0.0807           | <b>-0.0192</b>    | 0.1514           | 0.4699            | 0.1272        | 767 ± 52   | 800 ± 69   | 884 ± 56   | 975 ± 75   |
| 207725_at   | POU4F2  | POU domain, class 4, transcription factor 2                | 0.2444           | <b>-0.0179</b>    | 0.2280           | -0.3741           | <b>0.0090</b> | 85 ± 11    | 117 ± 15   | 99 ± 4     | 156 ± 23   |

| Probe set   | Name     | Description                                                   | NFT <sub>0</sub> | MMSE <sub>0</sub> | NFT <sub>1</sub> | MMSE <sub>1</sub> | ANOVA         | Control    | Incipient  | Moderate   | Severe     |
|-------------|----------|---------------------------------------------------------------|------------------|-------------------|------------------|-------------------|---------------|------------|------------|------------|------------|
| 217730_at   | PP1201   | PP1201 protein                                                | <b>0.0066</b>    | <b>-0.0546</b>    | 0.0628           | -0.4309           | 0.0612        | 481 ± 42   | 538 ± 103  | 747 ± 102  | 696 ± 51   |
| 203497_at   | PPARBP   | PPAR binding protein                                          | 0.0989           | <b>-0.0008</b>    | <b>0.0130</b>    | <b>-0.0248</b>    | <b>0.0219</b> | 219 ± 16   | 274 ± 16   | 287 ± 24   | 323 ± 33   |
| 37152_at    | PPARD    | peroxisome proliferative activated receptor, delta            | <b>0.0126</b>    | <b>-0.0412</b>    | 0.1345           | -0.3681           | 0.1062        | 1530 ± 160 | 1795 ± 206 | 1959 ± 137 | 2077 ± 143 |
| 210235_s_at | PPFIA1   | protein tyrosine phosphatase, receptor type, f                | <b>0.0046</b>    | -0.0588           | 0.1933           | -0.2761           | 0.0900        | 140 ± 8    | 167 ± 17   | 185 ± 18   | 220 ± 36   |
| 202066_at   | PPFIA1   | protein tyrosine phosphatase, receptor type, f polypeptide    | 0.0733           | <b>-0.0015</b>    | -0.4499          | -0.1055           | <b>0.0264</b> | 985 ± 130  | 1033 ± 109 | 1403 ± 101 | 1397 ± 133 |
| 202065_s_at | PPFIA1   | protein tyrosine phosphatase, receptor type, f polypeptide    | <b>0.0011</b>    | <b>-0.0365</b>    | 0.4079           | -0.3017           | 0.1226        | 155 ± 14   | 151 ± 8    | 197 ± 9    | 246 ± 59   |
| 212841_s_at | PPFIBP2  | PTPRF interacting protein, binding protein 2                  | <b>0.0484</b>    | -0.1761           | -0.2569          | -0.4983           | 0.6289        | 392 ± 66   | 386 ± 64   | 454 ± 68   | 492 ± 57   |
| 208993_s_at | PPIG     | peptidyl-prolyl isomerase G                                   | <b>0.0083</b>    | -0.5287           | <b>0.0029</b>    | -0.0878           | 0.3766        | 518 ± 51   | 638 ± 50   | 650 ± 52   | 628 ± 92   |
| 208994_s_at | PPIG     | peptidyl-prolyl isomerase G                                   | 0.7292           | <b>-0.0163</b>    | 0.2272           | -0.3274           | <b>0.0324</b> | 530 ± 28   | 576 ± 67   | 508 ± 41   | 761 ± 94   |
| 220158_at   | PPL13    | placental protein 13-like protein                             | 0.3020           | <b>-0.0314</b>    | 0.4667           | -0.3886           | 0.1124        | 206 ± 22   | 206 ± 15   | 208 ± 16   | 281 ± 38   |
| 209296_at   | PPM1B    | protein phosphatase 1B , magnesium-dependent, beta isoform    | 0.1784           | <b>-0.0386</b>    | -0.0717          | -0.3369           | 0.4205        | 1708 ± 174 | 1626 ± 213 | 1967 ± 249 | 2108 ± 254 |
| 204566_at   | PPM1D    | protein phosphatase 1D magnesium-dependent, delta isoform     | 0.3476           | <b>-0.0252</b>    | -0.2363          | -0.4974           | 0.1160        | 263 ± 22   | 267 ± 31   | 251 ± 30   | 350 ± 36   |
| 200726_at   | PPP1CC   | protein phosphatase 1, catalytic subunit, gamma isoform       | 0.1435           | <b>-0.0081</b>    | -0.1204          | -0.2027           | 0.1911        | 2398 ± 123 | 2317 ± 420 | 2673 ± 189 | 3037 ± 202 |
| 212680_x_at | PPP1R14B | protein phosphatase 1, regulatory subunit 14B                 | 0.1825           | <b>-0.0314</b>    | 0.4801           | 0.3522            | 0.0832        | 276 ± 33   | 226 ± 49   | 285 ± 40   | 438 ± 93   |
| 202014_at   | PPP1R15A | protein phosphatase 1, regulatory subunit 15A                 | <b>0.0098</b>    | <b>-0.0082</b>    | 0.3147           | <b>0.0340</b>     | <b>0.0366</b> | 186 ± 36   | 146 ± 20   | 211 ± 21   | 394 ± 109  |
| 37028_at    | PPP1R15A | protein phosphatase 1, regulatory subunit 15A                 | <b>0.0041</b>    | <b>-0.0128</b>    | -0.0903          | 0.1204            | <b>0.0048</b> | 601 ± 47   | 640 ± 96   | 576 ± 29   | 1078 ± 172 |
| 205478_at   | PPP1R1A  | protein phosphatase 1, regulatory subunit 1A                  | 0.6284           | <b>-0.0239</b>    | -0.3431          | -0.1275           | 0.1149        | 545 ± 34   | 533 ± 41   | 720 ± 33   | 848 ± 199  |
| 221088_s_at | PPP1R9A  | protein phosphatase 1, regulatory subunit 9A                  | <b>0.0211</b>    | -0.2320           | 0.3029           | -0.3311           | 0.3112        | 447 ± 53   | 382 ± 27   | 519 ± 61   | 582 ± 120  |
| 202883_s_at | PPP2R1B  | protein phosphatase 2 , regulatory subunit A , beta isoform   | <b>0.0391</b>    | <b>-0.0201</b>    | -0.1117          | -0.1160           | 0.2970        | 653 ± 51   | 691 ± 63   | 745 ± 27   | 808 ± 90   |
| 216105_x_at | PPP2R4   | protein phosphatase 2A, regulatory subunit B'                 | <b>0.0346</b>    | -0.9433           | -0.2356          | 0.4966            | 0.3095        | 794 ± 38   | 739 ± 55   | 931 ± 85   | 769 ± 112  |
| 211159_s_at | PPP2R5D  | protein phosphatase 2, regulatory subunit B , delta isoform   | <b>0.0359</b>    | -0.2226           | <b>-0.0117</b>   | 0.2715            | 0.3967        | 196 ± 19   | 195 ± 17   | 208 ± 2    | 233 ± 21   |
| 209826_at   | PPT2     | palmitoyl-protein thioesterase 2                              | <b>0.0048</b>    | -0.5098           | 0.1746           | 0.1236            | 0.7143        | 296 ± 20   | 304 ± 85   | 302 ± 46   | 380 ± 73   |
| 204086_at   | PRAME    | preferentially expressed antigen in melanoma                  | 0.5153           | <b>-0.0447</b>    | 0.1751           | -0.2056           | 0.3703        | 173 ± 30   | 156 ± 16   | 175 ± 22   | 231 ± 41   |
| 201494_at   | PRCP     | prolylcarboxypeptidase                                        | 0.5735           | <b>-0.0345</b>    | -0.4344          | <b>-0.0348</b>    | 0.4317        | 1333 ± 123 | 1500 ± 109 | 1544 ± 168 | 1687 ± 201 |
| 203057_s_at | PRDM2    | PR domain containing 2, with ZNF domain                       | <b>0.0299</b>    | -0.0576           | 0.4258           | -0.1576           | 0.0737        | 376 ± 28   | 513 ± 62   | 444 ± 40   | 558 ± 73   |
| 209766_at   | PRDX3    | peroxiredoxin 3                                               | 0.1138           | <b>-0.0099</b>    | 0.3414           | 0.3532            | <b>0.0250</b> | 177 ± 10   | 199 ± 16   | 196 ± 19   | 279 ± 40   |
| 37022_at    | PRELP    | proline arginine-rich end leucine-rich repeat protein         | 0.1874           | <b>-0.0079</b>    | 0.0762           | -0.3172           | <b>0.0407</b> | 698 ± 48   | 859 ± 86   | 837 ± 53   | 1062 ± 142 |
| 213052_at   | PRKAR2A  | protein kinase, cAMP-dependent, regulatory, type II, alpha    | <b>0.0117</b>    | -0.1242           | 0.1244           | -0.4929           | 0.1720        | 1170 ± 62  | 1354 ± 141 | 1398 ± 82  | 1483 ± 126 |
| 204842_x_at | PRKAR2A  | protein kinase, cAMP-dependent, regulatory, type II, alpha    | <b>0.0028</b>    | <b>-0.0302</b>    | <b>0.0249</b>    | -0.2060           | <b>0.0425</b> | 709 ± 64   | 984 ± 147  | 935 ± 68   | 1283 ± 234 |
| 204746_s_at | PRKCABP  | protein kinase C, alpha binding protein                       | <b>0.0474</b>    | -0.0758           | 0.1434           | -0.2528           | 0.1499        | 391 ± 31   | 458 ± 71   | 446 ± 29   | 561 ± 72   |
| 202161_at   | PRKCL1   | protein kinase C-like 1                                       | <b>0.0084</b>    | <b>-0.0231</b>    | 0.0854           | 0.4515            | 0.1113        | 310 ± 14   | 361 ± 26   | 438 ± 38   | 515 ± 114  |
| 204211_x_at | PRKR     | protein kinase, interferon-inducible double stranded RNA dep. | <b>0.0103</b>    | <b>-0.0043</b>    | <b>0.0395</b>    | <b>-0.0064</b>    | <b>0.0251</b> | 246 ± 21   | 330 ± 33   | 325 ± 28   | 450 ± 78   |
| 39313_at    | PRKWNK1  | protein kinase, lysine deficient 1                            | <b>0.0064</b>    | <b>-0.0496</b>    | <b>0.0526</b>    | -0.3309           | 0.1312        | 152 ± 17   | 206 ± 36   | 229 ± 35   | 266 ± 48   |
| 204061_at   | PRKX     | protein kinase, X-linked                                      | 0.1732           | <b>-0.0020</b>    | <b>-0.0415</b>   | 0.2905            | <b>0.0240</b> | 294 ± 40   | 215 ± 21   | 345 ± 35   | 435 ± 73   |
| 204060_s_at | PRKX     | protein kinase, X-linked                                      | <b>0.0024</b>    | <b>-0.0001</b>    | -0.1192          | -0.4796           | <b>0.0041</b> | 374 ± 33   | 349 ± 12   | 465 ± 43   | 599 ± 74   |
| 205445_at   | PRL      | prolactin                                                     | 0.4642           | <b>-0.0011</b>    | <b>0.0380</b>    | <b>-0.0237</b>    | <b>0.0194</b> | 170 ± 7    | 198 ± 24   | 179 ± 5    | 252 ± 29   |
| 216638_s_at | PRLR     | prolactin receptor                                            | <b>0.0475</b>    | -0.0855           | -0.1510          | 0.4310            | <b>0.0176</b> | 57 ± 12    | 50 ± 9     | 38 ± 10    | 104 ± 22   |
| 220696_at   | PRO0478  | PRO0478 protein                                               | 0.1663           | <b>-0.0464</b>    | <b>0.0283</b>    | <b>-0.0020</b>    | <b>0.0355</b> | 69 ± 12    | 90 ± 12    | 136 ± 21   | 92 ± 18    |
| 207401_at   | PROX1    | prospero-related homeobox 1                                   | <b>0.0419</b>    | <b>-0.0341</b>    | -0.3715          | 0.2964            | <b>0.0547</b> | 68 ± 14    | 51 ± 11    | 80 ± 12    | 105 ± 13   |
| 202126_at   | PRPF4B   | PRP4 pre-mRNA processing factor 4 homolog B                   | <b>0.0258</b>    | <b>-0.0201</b>    | <b>0.0247</b>    | -0.2297           | 0.0927        | 1002 ± 53  | 1076 ± 41  | 1159 ± 63  | 1199 ± 72  |
| 200000_s_at | PRPF8    | PRP8 pre-mRNA processing factor 8 homolog                     | <b>0.0081</b>    | <b>-0.0126</b>    | -0.2210          | 0.4400            | <b>0.0224</b> | 1501 ± 72  | 1369 ± 71  | 1551 ± 80  | 1732 ± 41  |
| 209017_s_at | PRSS15   | protease, serine, 15                                          | <b>0.0418</b>    | <b>-0.0462</b>    | 0.3570           | 0.1826            | 0.1744        | 759 ± 43   | 781 ± 98   | 783 ± 78   | 1053 ± 175 |



| Probe set   | Name    | Description                                         | NFT <sub>0</sub> | MMSE <sub>0</sub> | NFT <sub>1</sub> | MMSE <sub>1</sub> | ANOVA         | Control    | Incipient  | Moderate   | Severe      |
|-------------|---------|-----------------------------------------------------|------------------|-------------------|------------------|-------------------|---------------|------------|------------|------------|-------------|
| 211152_s_at | PRSS25  | protease, serine, 25                                | <b>0.0311</b>    | <b>-0.0011</b>    | 0.3142           | -0.3684           | <b>0.0085</b> | 232 ± 12   | 238 ± 9    | 313 ± 28   | 312 ± 21    |
| 202880_s_at | PSCD1   | pleckstrin homology, Sec7 and coiled/coil domains 1 | <b>0.0186</b>    | <b>-0.0142</b>    | <b>0.0530</b>    | -0.0749           | 0.0937        | 531 ± 31   | 730 ± 103  | 799 ± 98   | 899 ± 170   |
| 203399_x_at | PSG3    | pregnancy specific beta-1-glycoprotein 3            | 0.2826           | <b>-0.0111</b>    | 0.1048           | <b>-0.0100</b>    | 0.2034        | 71 ± 9     | 82 ± 13    | 76 ± 15    | 111 ± 18    |
| 201053_s_at | PSMF1   | proteasome inhibitor subunit 1                      | 0.5086           | <b>-0.0246</b>    | 0.1422           | -0.0754           | 0.1961        | 443 ± 38   | 514 ± 50   | 499 ± 31   | 586 ± 63    |
| 215233_at   | PSR     | phosphatidylserine receptor                         | <b>0.0030</b>    | -0.1146           | <b>-0.0022</b>   | 0.3050            | 0.0887        | 237 ± 31   | 113 ± 31   | 363 ± 75   | 327 ± 103   |
| 212722_s_at | PSR     | phosphatidylserine receptor                         | <b>0.0066</b>    | <b>-0.0227</b>    | 0.2791           | 0.2951            | 0.3001        | 121 ± 11   | 126 ± 14   | 146 ± 20   | 190 ± 50    |
| 212015_x_at | PTBP1   | polypyrimidine tract binding protein 1              | <b>0.0306</b>    | -0.1288           | -0.0822          | 0.2286            | <b>0.0462</b> | 362 ± 28   | 389 ± 68   | 536 ± 45   | 448 ± 40    |
| 211270_x_at | PTBP1   | polypyrimidine tract binding protein 1              | <b>0.0002</b>    | <b>-0.0017</b>    | -0.4944          | -0.1343           | <b>0.0160</b> | 566 ± 51   | 683 ± 79   | 850 ± 87   | 870 ± 76    |
| 216306_x_at | PTBP1   | polypyrimidine tract binding protein 1              | <b>0.0000</b>    | <b>-0.0080</b>    | -0.3438          | -0.1018           | <b>0.0139</b> | 655 ± 76   | 763 ± 67   | 1021 ± 101 | 962 ± 90    |
| 211271_x_at | PTBP1   | polypyrimidine tract binding protein 1              | <b>0.0004</b>    | <b>-0.0203</b>    | -0.1738          | -0.1182           | <b>0.0465</b> | 492 ± 37   | 568 ± 84   | 714 ± 46   | 655 ± 57    |
| 209815_at   | PTCH    | patched homolog                                     | 0.3840           | <b>-0.0278</b>    | -0.3552          | -0.1513           | 0.1068        | 580 ± 57   | 556 ± 45   | 760 ± 94   | 713 ± 35    |
| 211252_x_at | PTCRA   | pre-T-cell receptor alpha precursor                 | 0.0739           | <b>-0.0054</b>    | <b>0.0513</b>    | -0.1717           | <b>0.0429</b> | 436 ± 31   | 557 ± 77   | 578 ± 60   | 713 ± 93    |
| 221005_s_at | PTDSS2  | phosphatidylserine synthase 2                       | 0.0767           | <b>-0.0374</b>    | 0.2876           | -0.2261           | 0.1245        | 300 ± 26   | 301 ± 15   | 404 ± 46   | 383 ± 50    |
| 210702_s_at | PTGIS   | prostaglandin I2 synthase                           | <b>0.0487</b>    | <b>-0.0404</b>    | <b>0.0043</b>    | -0.1266           | 0.0582        | 54 ± 9     | 94 ± 13    | 88 ± 20    | 126 ± 27    |
| 205128_x_at | PTGS1   | prostaglandin-endoperoxide synthase 1               | <b>0.0239</b>    | -0.0967           | <b>0.0116</b>    | -0.1446           | 0.1213        | 386 ± 39   | 521 ± 47   | 500 ± 62   | 571 ± 62    |
| 205911_at   | PTHR1   | parathyroid hormone receptor 1                      | <b>0.0004</b>    | <b>-0.0490</b>    | <b>0.0360</b>    | -0.4442           | 0.0721        | 329 ± 20   | 454 ± 74   | 514 ± 48   | 551 ± 100   |
| 211921_x_at | PTMA    | prothymosin, alpha                                  | <b>0.0417</b>    | <b>-0.0372</b>    | 0.2769           | -0.2721           | 0.2916        | 3270 ± 222 | 3812 ± 583 | 4248 ± 432 | 4259 ± 440  |
| 208617_s_at | PTP4A2  | protein tyrosine phosphatase type IVA, member 2     | 0.1686           | <b>-0.0346</b>    | 0.4635           | -0.2168           | 0.2035        | 4403 ± 445 | 4600 ± 465 | 5632 ± 441 | 5320 ± 491  |
| 208616_s_at | PTP4A2  | protein tyrosine phosphatase type IVA, member 2     | 0.4269           | <b>-0.0374</b>    | -0.4687          | -0.2230           | 0.4894        | 4527 ± 377 | 4492 ± 383 | 4925 ± 537 | 5371 ± 300  |
| 209695_at   | PTP4A3  | protein tyrosine phosphatase type IVA, member 3     | <b>0.0443</b>    | -0.2697           | 0.4945           | 0.4491            | 0.5277        | 419 ± 38   | 394 ± 20   | 508 ± 46   | 492 ± 111   |
| 200635_s_at | PTPRF   | protein tyrosine phosphatase, receptor type, F      | <b>0.0131</b>    | -0.2112           | 0.4725           | -0.0859           | 0.1438        | 329 ± 29   | 369 ± 28   | 469 ± 21   | 398 ± 76    |
| 208300_at   | PTPRH   | protein tyrosine phosphatase, receptor type, H      | <b>0.0395</b>    | -0.1097           | 0.4328           | -0.3639           | 0.1764        | 141 ± 18   | 163 ± 14   | 164 ± 20   | 219 ± 39    |
| 203038_at   | PTPRK   | protein tyrosine phosphatase, receptor type, K      | <b>0.0062</b>    | <b>-0.0039</b>    | -0.1297          | -0.2852           | <b>0.0461</b> | 1992 ± 286 | 2153 ± 376 | 2732 ± 224 | 3066 ± 245  |
| 208789_at   | PTRF    | polymerase I and transcript release factor          | <b>0.0011</b>    | <b>-0.0027</b>    | 0.2795           | -0.1749           | <b>0.0513</b> | 604 ± 87   | 709 ± 124  | 1004 ± 125 | 1088 ± 209  |
| 200677_at   | PTTG1IP | pituitary tumor-transforming 1 interacting protein  | <b>0.0351</b>    | <b>-0.0001</b>    | -0.2915          | -0.2062           | <b>0.0046</b> | 2393 ± 185 | 2503 ± 330 | 3374 ± 265 | 3682 ± 326  |
| 201164_s_at | PUM1    | pumilio homolog 1                                   | <b>0.0068</b>    | 0.6643            | -0.4315          | <b>0.0272</b>     | 0.5530        | 968 ± 50   | 865 ± 38   | 1012 ± 88  | 895 ± 118   |
| 204021_s_at | PURA    | purine-rich element binding protein A               | 0.0964           | <b>-0.0050</b>    | -0.0979          | 0.1572            | <b>0.0017</b> | 776 ± 70   | 603 ± 36   | 770 ± 54   | 1200 ± 161  |
| 204020_at   | PURA    | purine-rich element binding protein A               | <b>0.0460</b>    | <b>-0.0130</b>    | -0.3091          | -0.2161           | 0.1014        | 4505 ± 145 | 4334 ± 190 | 4796 ± 224 | 4982 ± 90   |
| 201087_at   | PXN     | paxillin                                            | <b>0.0233</b>    | <b>-0.0361</b>    | 0.1051           | <b>-0.0319</b>    | 0.2670        | 602 ± 53   | 649 ± 37   | 735 ± 81   | 780 ± 89    |
| 207330_at   | PZP     | pregnancy-zone protein                              | 0.1449           | <b>-0.0106</b>    | 0.0668           | -0.4680           | <b>0.0022</b> | 227 ± 28   | 328 ± 55   | 229 ± 18   | 448 ± 56    |
| 217846_at   | QARS    | glutamyl-tRNA synthetase                            | <b>0.0059</b>    | <b>-0.0209</b>    | <b>0.0045</b>    | -0.1218           | 0.0880        | 1227 ± 65  | 1356 ± 76  | 1427 ± 89  | 1581 ± 148  |
| 212263_at   | QKI     | homolog of mouse quaking QKI                        | <b>0.0521</b>    | <b>-0.0290</b>    | 0.3669           | -0.0868           | 0.1559        | 1853 ± 197 | 2286 ± 332 | 2395 ± 202 | 2604 ± 209  |
| 212636_at   | QKI     | homolog of mouse quaking QKI                        | <b>0.0005</b>    | <b>-0.0010</b>    | <b>0.0054</b>    | <b>-0.0078</b>    | <b>0.0031</b> | 6635 ± 488 | 9010 ± 882 | 1099 ± 793 | 0982 ± 1262 |
| 212262_at   | QKI     | homolog of mouse quaking QKI                        | <b>0.0041</b>    | <b>-0.0014</b>    | <b>0.0180</b>    | <b>-0.0428</b>    | <b>0.0044</b> | 503 ± 12   | 673 ± 57   | 759 ± 46   | 821 ± 100   |
| 210714_at   | R3HDM   | R3H domain containing                               | <b>0.0035</b>    | <b>-0.0503</b>    | -0.4702          | 0.4698            | 0.1971        | 219 ± 31   | 216 ± 45   | 268 ± 52   | 374 ± 90    |
| 217793_at   | RAB11B  | RAB11B, member RAS oncogene family                  | <b>0.0501</b>    | <b>-0.0496</b>    | 0.1744           | -0.1866           | 0.2098        | 336 ± 36   | 297 ± 35   | 348 ± 29   | 484 ± 112   |
| 202252_at   | RAB13   | RAB13, member RAS oncogene family                   | <b>0.0001</b>    | <b>-0.0049</b>    | 0.2138           | -0.3645           | <b>0.0056</b> | 897 ± 127  | 1125 ± 163 | 1695 ± 171 | 1586 ± 223  |
| 220964_s_at | RAB1B   | RAB1B, member RAS oncogene family                   | <b>0.0197</b>    | -0.5264           | <b>0.0471</b>    | <b>-0.0233</b>    | 0.3043        | 814 ± 93   | 1064 ± 130 | 1187 ± 103 | 1010 ± 241  |
| 208730_x_at | RAB2    | RAB2, member RAS oncogene family                    | 0.0716           | <b>-0.0398</b>    | 0.0827           | <b>-0.0213</b>    | <b>0.0418</b> | 511 ± 45   | 627 ± 41   | 576 ± 78   | 870 ± 153   |
| 218360_at   | RAB22A  | RAB22A, member RAS oncogene family                  | 0.1373           | <b>-0.0055</b>    | 0.2237           | -0.1059           | <b>0.0137</b> | 289 ± 21   | 337 ± 19   | 306 ± 24   | 389 ± 17    |
| 217762_s_at | RAB31   | RAB31, member RAS oncogene family                   | 0.2297           | <b>-0.0180</b>    | 0.2812           | -0.1812           | <b>0.0138</b> | 1432 ± 102 | 1555 ± 112 | 1976 ± 122 | 1724 ± 118  |
| 217764_s_at | RAB31   | RAB31, member RAS oncogene family                   | 0.1283           | <b>-0.0419</b>    | 0.4453           | -0.4229           | 0.1264        | 3180 ± 207 | 3292 ± 251 | 3920 ± 186 | 3705 ± 343  |

| Probe set   | Name     | Description                                              | NFT <sub>0</sub> | MMSE <sub>0</sub> | NFT <sub>1</sub> | MMSE <sub>1</sub> | ANOVA         | Control    | Incipient  | Moderate   | Severe      |
|-------------|----------|----------------------------------------------------------|------------------|-------------------|------------------|-------------------|---------------|------------|------------|------------|-------------|
| 217763_s_at | RAB31    | RAB31, member RAS oncogene family                        | <b>0.0208</b>    | <b>-0.0035</b>    | 0.1143           | -0.3723           | <b>0.0129</b> | 1585 ± 103 | 1671 ± 198 | 2164 ± 133 | 2199 ± 186  |
| 213531_s_at | RAB3GAP  | RAB3 GTPase-ACTIVATING PROTEIN                           | <b>0.0111</b>    | -0.2783           | -0.3024          | 0.4026            | 0.4796        | 3895 ± 362 | 3823 ± 552 | 4573 ± 696 | 5071 ± 894  |
| 203223_at   | RAB5EP   | rabaptin-5                                               | <b>0.0111</b>    | <b>-0.0026</b>    | 0.1192           | <b>-0.0265</b>    | <b>0.0280</b> | 64 ± 10    | 100 ± 14   | 97 ± 16    | 137 ± 22    |
| 208641_s_at | RAC1     | ras-related C3 botulinum toxin substrate 1               | <b>0.0418</b>    | -0.1343           | 0.4572           | 0.1130            | 0.1295        | 5886 ± 525 | 5738 ± 741 | 5720 ± 521 | 7954 ± 1103 |
| 204461_x_at | RAD1     | RAD1 homolog                                             | <b>0.0219</b>    | -0.1051           | <b>0.0180</b>    | 0.2628            | 0.1006        | 349 ± 32   | 361 ± 58   | 481 ± 44   | 502 ± 72    |
| 221523_s_at | RAGD     | Rag D protein                                            | <b>0.0095</b>    | -0.0693           | 0.1697           | 0.0922            | 0.2760        | 619 ± 32   | 617 ± 51   | 654 ± 42   | 749 ± 79    |
| 218849_s_at | RAI      | RelA-associated inhibitor                                | <b>0.0013</b>    | <b>-0.0004</b>    | <b>0.0538</b>    | <b>-0.0466</b>    | <b>0.0016</b> | 328 ± 32   | 451 ± 31   | 451 ± 43   | 703 ± 108   |
| 212124_at   | RAI17    | retinoic acid induced 17                                 | 0.6879           | <b>-0.0375</b>    | <b>-0.0374</b>   | -0.2345           | 0.1936        | 1912 ± 97  | 1941 ± 116 | 2173 ± 54  | 2087 ± 113  |
| 214435_x_at | RALA     | v-ral simian leukemia viral oncogene homolog A           | <b>0.0239</b>    | <b>-0.0250</b>    | 0.0850           | 0.4558            | <b>0.0393</b> | 251 ± 13   | 274 ± 28   | 274 ± 14   | 369 ± 52    |
| 202844_s_at | RALBP1   | ralA binding protein 1                                   | 0.2783           | <b>-0.0415</b>    | -0.3200          | -0.4585           | 0.0736        | 485 ± 54   | 438 ± 38   | 459 ± 19   | 609 ± 55    |
| 209051_s_at | RALGDS   | ral guanine nucleotide dissociation stimulator           | <b>0.0342</b>    | -0.1752           | -0.1360          | -0.4036           | 0.1803        | 732 ± 140  | 700 ± 79   | 1053 ± 106 | 866 ± 141   |
| 209050_s_at | RALGDS   | ral guanine nucleotide dissociation stimulator           | <b>0.0006</b>    | <b>-0.0052</b>    | -0.4854          | 0.4162            | <b>0.0197</b> | 2790 ± 314 | 2596 ± 203 | 3981 ± 659 | 6540 ± 1705 |
| 210552_s_at | RALGPS1A | Ral guanine nucleotide exchange factor RalGPS1A          | 0.3669           | <b>-0.0258</b>    | 0.0968           | -0.2394           | 0.3475        | 110 ± 8    | 121 ± 12   | 123 ± 13   | 148 ± 23    |
| 201271_s_at | RALY     | RNA binding protein                                      | 0.2539           | <b>-0.0393</b>    | 0.3665           | 0.2195            | 0.1213        | 490 ± 59   | 382 ± 36   | 477 ± 51   | 612 ± 80    |
| 204916_at   | RAMP1    | receptor activity modifying protein 1                    | 0.1731           | <b>-0.0038</b>    | 0.0603           | 0.4486            | <b>0.0316</b> | 866 ± 64   | 841 ± 51   | 962 ± 56   | 1099 ± 71   |
| 202640_s_at | RANBP3   | RAN binding protein 3                                    | <b>0.0251</b>    | <b>-0.0191</b>    | -0.3513          | -0.3009           | <b>0.0114</b> | 381 ± 26   | 350 ± 34   | 543 ± 52   | 485 ± 56    |
| 212127_at   | RANGAP1  | Ran GTPase activating protein 1                          | <b>0.0015</b>    | -0.2068           | -0.2733          | -0.4353           | 0.3901        | 551 ± 64   | 582 ± 35   | 607 ± 72   | 766 ± 163   |
| 209285_s_at | RAP140   | KIAA1105 protein                                         | 0.0654           | <b>-0.0039</b>    | 0.1381           | <b>-0.0103</b>    | <b>0.0547</b> | 918 ± 67   | 1160 ± 142 | 1252 ± 71  | 1279 ± 119  |
| 205080_at   | RARB     | retinoic acid receptor, beta                             | 0.1443           | <b>-0.0395</b>    | -0.1468          | 0.4361            | 0.0861        | 341 ± 42   | 322 ± 31   | 345 ± 18   | 451 ± 44    |
| 209496_at   | RARRES2  | retinoic acid receptor responder 2                       | <b>0.0109</b>    | <b>-0.0005</b>    | 0.3095           | 0.2327            | <b>0.0043</b> | 281 ± 38   | 319 ± 47   | 414 ± 39   | 529 ± 64    |
| 204070_at   | RARRES3  | retinoic acid receptor responder 3                       | 0.0720           | <b>-0.0326</b>    | 0.3585           | -0.1098           | 0.2308        | 498 ± 48   | 522 ± 77   | 633 ± 52   | 619 ± 36    |
| 214368_at   | RASGRP2  | RAS guanyl releasing protein 2                           | <b>0.0269</b>    | -0.2404           | -0.3323          | -0.3678           | 0.0837        | 43 ± 11    | 71 ± 21    | 113 ± 18   | 85 ± 24     |
| 219214_s_at | RBAK     | RB-associated KRAB repressor                             | <b>0.0374</b>    | -0.3075           | <b>0.0094</b>    | -0.4507           | 0.1300        | 117 ± 10   | 188 ± 18   | 149 ± 27   | 181 ± 34    |
| 205062_x_at | RBBP1    | retinoblastoma binding protein 1                         | <b>0.0209</b>    | -0.2634           | <b>0.0245</b>    | 0.3884            | 0.3650        | 223 ± 15   | 230 ± 18   | 260 ± 16   | 258 ± 24    |
| 202040_s_at | RBBP2    | retinoblastoma binding protein 2                         | <b>0.0024</b>    | <b>-0.0106</b>    | 0.1014           | -0.3293           | <b>0.0346</b> | 535 ± 53   | 598 ± 73   | 644 ± 27   | 811 ± 96    |
| 205169_at   | RBBP5    | retinoblastoma binding protein 5                         | <b>0.0463</b>    | -0.3678           | -0.3349          | <b>-0.0385</b>    | 0.7640        | 165 ± 13   | 176 ± 18   | 179 ± 25   | 196 ± 27    |
| 212781_at   | RBBP6    | retinoblastoma binding protein 6                         | <b>0.0095</b>    | -0.2117           | <b>0.0381</b>    | -0.3574           | 0.2409        | 398 ± 32   | 464 ± 60   | 506 ± 27   | 476 ± 38    |
| 212783_at   | RBBP6    | retinoblastoma binding protein 6                         | <b>0.0354</b>    | -0.0788           | 0.4745           | 0.3680            | 0.1531        | 765 ± 80   | 824 ± 124  | 1118 ± 149 | 1020 ± 132  |
| 205296_at   | RBL1     | retinoblastoma-like 1                                    | <b>0.0004</b>    | <b>-0.0027</b>    | <b>0.0106</b>    | <b>-0.0012</b>    | <b>0.0095</b> | 41 ± 6     | 77 ± 11    | 99 ± 10    | 109 ± 25    |
| 208984_x_at | RBM10    | RNA binding motif protein 10                             | <b>0.0000</b>    | -0.0610           | 0.0963           | -0.4212           | 0.0690        | 396 ± 27   | 448 ± 43   | 627 ± 55   | 611 ± 130   |
| 219286_s_at | RBM15    | RNA binding motif protein 15                             | <b>0.0074</b>    | <b>-0.0401</b>    | -0.0558          | 0.4091            | <b>0.0318</b> | 602 ± 62   | 457 ± 33   | 856 ± 127  | 787 ± 110   |
| 222026_at   | RBM3     | RNA binding motif protein 3                              | <b>0.0245</b>    | -0.3758           | 0.1587           | 0.3906            | 0.6027        | 263 ± 23   | 274 ± 27   | 321 ± 23   | 310 ± 65    |
| 201967_at   | RBM6     | RNA binding motif protein 6                              | <b>0.0196</b>    | -0.0963           | -0.1343          | -0.2604           | 0.2455        | 1276 ± 201 | 1245 ± 126 | 1734 ± 212 | 1591 ± 230  |
| 213852_at   | RBM8A    | RNA binding motif protein 8A                             | -0.9563          | <b>-0.0198</b>    | <b>0.0006</b>    | -0.1022           | <b>0.0384</b> | 1490 ± 72  | 1804 ± 46  | 1806 ± 80  | 1888 ± 173  |
| 215127_s_at | RBMS1    | RNA binding motif, single stranded interacting protein 1 | 0.1620           | <b>-0.0343</b>    | 0.2688           | -0.1520           | 0.2489        | 606 ± 45   | 595 ± 64   | 745 ± 70   | 740 ± 94    |
| 34187_at    | RBMS2    | RNA binding motif, single stranded interacting protein 2 | <b>0.0003</b>    | <b>-0.0097</b>    | 0.2625           | -0.0838           | <b>0.0413</b> | 61 ± 10    | 61 ± 7     | 95 ± 10    | 101 ± 18    |
| 206767_at   | RBMS3    | RNA binding motif, single stranded interacting protein   | 0.1478           | <b>-0.0101</b>    | 0.1234           | -0.3970           | <b>0.0487</b> | 340 ± 33   | 353 ± 35   | 427 ± 23   | 459 ± 41    |
| 207836_s_at | RBPMS    | RNA-binding protein gene with multiple splicing          | <b>0.0493</b>    | <b>-0.0006</b>    | -0.3577          | -0.1852           | <b>0.0148</b> | 72 ± 11    | 82 ± 9     | 93 ± 6     | 124 ± 16    |
| 209487_at   | RBPMS    | RNA-binding protein gene with multiple splicing          | <b>0.0071</b>    | <b>-0.0116</b>    | 0.1152           | 0.2701            | <b>0.0534</b> | 204 ± 25   | 245 ± 53   | 366 ± 67   | 386 ± 55    |
| 219382_at   | RBT1     | RPA-binding trans-activator                              | <b>0.0045</b>    | <b>-0.0001</b>    | 0.2426           | <b>-0.0062</b>    | <b>0.0014</b> | 287 ± 24   | 334 ± 12   | 346 ± 20   | 478 ± 55    |
| 212977_at   | RDC1     | G protein-coupled receptor                               | <b>0.0326</b>    | <b>-0.0115</b>    | -0.3993          | -0.0569           | <b>0.0410</b> | 233 ± 21   | 274 ± 39   | 359 ± 40   | 348 ± 41    |
| 219155_at   | RDGBB    | retinal degeneration B beta                              | <b>0.0027</b>    | <b>-0.0079</b>    | 0.2426           | 0.4367            | <b>0.0486</b> | 635 ± 58   | 702 ± 107  | 881 ± 78   | 929 ± 92    |

| Probe set   | Name     | Description                                                | NFT <sub>0</sub> | MMSE <sub>0</sub> | NFT <sub>1</sub> | MMSE <sub>1</sub> | ANOVA         | Control    | Incipient  | Moderate   | Severe      |
|-------------|----------|------------------------------------------------------------|------------------|-------------------|------------------|-------------------|---------------|------------|------------|------------|-------------|
| 219799_s_at | RDHL     | NADP-dependent retinol dehydrogenase/reductase             | 0.4356           | <b>-0.0359</b>    | <b>0.0517</b>    | -0.1756           | <b>0.0119</b> | 294 ± 32   | 447 ± 68   | 336 ± 44   | 534 ± 59    |
| 218599_at   | REC8     | Rec8p                                                      | 0.2758           | <b>-0.0057</b>    | -0.2864          | -0.1630           | <b>0.0510</b> | 367 ± 26   | 411 ± 53   | 409 ± 28   | 513 ± 33    |
| 211168_s_at | RENT1    | regulator of nonsense transcripts 1                        | <b>0.0101</b>    | <b>-0.0006</b>    | 0.3164           | 0.3478            | <b>0.0013</b> | 463 ± 22   | 468 ± 33   | 507 ± 30   | 676 ± 58    |
| 203600_s_at | RES4-22  | gene with multiple splice variants near HD locus on 4p16.3 | <b>0.0236</b>    | -0.0741           | 0.3668           | 0.2766            | 0.1669        | 867 ± 26   | 965 ± 60   | 939 ± 72   | 1072 ± 80   |
| 214661_s_at | RES4-25  | gene near HD on 4p16.3                                     | 0.0988           | <b>-0.0121</b>    | 0.3328           | 0.3937            | <b>0.0102</b> | 265 ± 13   | 290 ± 29   | 271 ± 11   | 383 ± 40    |
| 212920_at   | REST     | RE1-silencing transcription factor                         | <b>0.0365</b>    | <b>-0.0166</b>    | -0.2577          | 0.4119            | 0.0974        | 145 ± 11   | 141 ± 13   | 162 ± 21   | 194 ± 14    |
| 212968_at   | RFNG     | radical fringe homolog                                     | <b>0.0014</b>    | -0.1213           | -0.3207          | 0.3628            | 0.1974        | 424 ± 13   | 410 ± 22   | 484 ± 16   | 519 ± 78    |
| 207672_at   | RFX4     | regulatory factor X, 4                                     | 0.2115           | <b>-0.0018</b>    | -0.3907          | -0.4004           | <b>0.0403</b> | 64 ± 18    | 87 ± 14    | 143 ± 34   | 184 ± 48    |
| 210751_s_at | RGN      | regucalcin                                                 | 0.0604           | <b>-0.0079</b>    | 0.1159           | -0.1632           | <b>0.0119</b> | 399 ± 36   | 473 ± 48   | 466 ± 19   | 610 ± 55    |
| 209639_s_at | RGS12    | regulator of G-protein signalling 12                       | <b>0.0062</b>    | <b>-0.0547</b>    | 0.4138           | -0.4777           | 0.1434        | 175 ± 15   | 177 ± 20   | 230 ± 30   | 259 ± 44    |
| 205823_at   | RGS12    | regulator of G-protein signalling 12                       | 0.2130           | <b>-0.0047</b>    | 0.2099           | -0.4334           | <b>0.0454</b> | 468 ± 20   | 480 ± 42   | 537 ± 37   | 614 ± 51    |
| 209324_s_at | RGS16    | regulator of G-protein signalling 16                       | 0.1043           | <b>-0.0036</b>    | -0.2729          | -0.4144           | <b>0.0083</b> | 328 ± 30   | 341 ± 34   | 366 ± 43   | 517 ± 46    |
| 207525_s_at | RGS19IP1 | regulator of G-protein signalling 19 interacting protein 1 | <b>0.0238</b>    | -0.1713           | <b>0.0105</b>    | -0.4184           | 0.2236        | 885 ± 24   | 1039 ± 77  | 1068 ± 64  | 1157 ± 163  |
| 206518_s_at | RGS9     | regulator of G-protein signalling 9                        | <b>0.0317</b>    | -0.2796           | <b>0.0287</b>    | -0.4574           | 0.5473        | 88 ± 6     | 110 ± 11   | 107 ± 23   | 120 ± 19    |
| 213409_s_at | RHEB2    | Ras homolog enriched in brain 2                            | <b>0.0509</b>    | <b>-0.0136</b>    | 0.1401           | <b>-0.0536</b>    | 0.0964        | 148 ± 18   | 172 ± 23   | 179 ± 14   | 211 ± 8     |
| 216049_at   | RHOBTB3  | Rho-related BTB domain containing 3                        | 0.0997           | <b>-0.0038</b>    | 0.1935           | -0.4185           | <b>0.0024</b> | 80 ± 10    | 72 ± 9     | 76 ± 13    | 161 ± 27    |
| 202975_s_at | RHOBTB3  | Rho-related BTB domain containing 3                        | <b>0.0003</b>    | <b>-0.0403</b>    | 0.1039           | -0.2136           | <b>0.0129</b> | 1350 ± 103 | 1632 ± 149 | 2138 ± 216 | 1942 ± 184  |
| 203596_s_at | RI58     | retinoic acid- and interferon-inducible protein            | 0.1430           | <b>-0.0348</b>    | -0.0773          | 0.3114            | 0.0765        | 353 ± 14   | 284 ± 54   | 362 ± 11   | 411 ± 33    |
| 218076_s_at | RICH1    | homolog of rat nadrin                                      | <b>0.0152</b>    | <b>-0.0003</b>    | 0.2587           | <b>-0.0162</b>    | <b>0.0030</b> | 536 ± 39   | 621 ± 47   | 614 ± 49   | 887 ± 99    |
| 221126_at   | RIG      | regulated in glioma                                        | <b>0.0037</b>    | <b>-0.0549</b>    | 0.4428           | -0.2707           | 0.1835        | 79 ± 10    | 82 ± 11    | 104 ± 14   | 132 ± 32    |
| 221127_s_at | RIG      | regulated in glioma                                        | 0.6704           | <b>-0.0376</b>    | 0.4063           | -0.2458           | 0.2803        | 977 ± 93   | 1080 ± 169 | 1178 ± 92  | 1326 ± 150  |
| 211564_s_at | RIL      | LIM domain protein                                         | 0.1519           | <b>-0.0077</b>    | 0.2047           | 0.4985            | <b>0.0250</b> | 118 ± 16   | 177 ± 24   | 172 ± 27   | 256 ± 45    |
| 215478_at   | RIMS2    | regulating synaptic membrane exocytosis 2                  | 0.3706           | <b>-0.0188</b>    | 0.3501           | -0.1803           | 0.1450        | 57 ± 12    | 56 ± 7     | 66 ± 13    | 103 ± 24    |
| 60471_at    | RIN3     | Ras and Rab interactor 3                                   | <b>0.0120</b>    | <b>-0.0003</b>    | 0.1182           | -0.2578           | <b>0.0065</b> | 302 ± 40   | 345 ± 41   | 402 ± 55   | 654 ± 121   |
| 219457_s_at | RIN3     | Ras and Rab interactor 3                                   | <b>0.0072</b>    | <b>-0.0016</b>    | 0.1846           | -0.3083           | <b>0.0223</b> | 99 ± 25    | 131 ± 29   | 163 ± 30   | 270 ± 63    |
| 219312_s_at | RINZF    | zinc finger protein RINZF                                  | <b>0.0077</b>    | <b>-0.0001</b>    | <b>0.0259</b>    | <b>-0.0048</b>    | <b>0.0024</b> | 53 ± 4     | 64 ± 9     | 87 ± 9     | 92 ± 5      |
| 219041_s_at | RIP60    | replication initiation region protein                      | <b>0.0112</b>    | <b>-0.0004</b>    | 0.4222           | 0.3474            | <b>0.0019</b> | 986 ± 67   | 921 ± 60   | 1290 ± 99  | 1351 ± 78   |
| 211753_s_at | RLN1     | relaxin 1                                                  | <b>0.0437</b>    | <b>-0.0015</b>    | 0.2236           | 0.1966            | <b>0.0035</b> | 79 ± 9     | 85 ± 18    | 90 ± 8     | 154 ± 20    |
| 210524_x_at | RNAHP    | RNA helicase-related protein                               | 0.4991           | <b>-0.0261</b>    | 0.3426           | <b>-0.0369</b>    | 0.0738        | 3327 ± 296 | 4122 ± 268 | 3837 ± 200 | 5610 ± 1181 |
| 201788_at   | RNAHP    | RNA helicase-related protein                               | 0.2647           | <b>-0.0300</b>    | 0.2686           | -0.4426           | 0.3034        | 1228 ± 77  | 1394 ± 168 | 1563 ± 147 | 1599 ± 206  |
| 213397_x_at | RNASE4   | ribonuclease, RNase A family, 4                            | 0.0777           | <b>-0.0118</b>    | -0.2765          | -0.3788           | 0.1338        | 279 ± 31   | 307 ± 26   | 303 ± 23   | 397 ± 56    |
| 205158_at   | RNASE4   | ribonuclease, RNase A family, 4                            | 0.1817           | <b>-0.0206</b>    | -0.4801          | -0.4339           | 0.1381        | 107 ± 19   | 125 ± 19   | 118 ± 12   | 166 ± 19    |
| 217984_at   | RNASE6PL | ribonuclease 6 precursor                                   | 0.7632           | <b>-0.0432</b>    | 0.0616           | <b>-0.0270</b>    | <b>0.0356</b> | 1671 ± 133 | 2260 ± 119 | 1887 ± 199 | 2454 ± 283  |
| 203022_at   | RNASEH2A | ribonuclease H2, large subunit                             | 0.0821           | <b>-0.0344</b>    | <b>0.0285</b>    | -0.3617           | <b>0.0019</b> | 262 ± 18   | 311 ± 37   | 247 ± 7    | 380 ± 13    |
| 221154_at   | RNF18    | ring finger protein 18                                     | <b>0.0296</b>    | <b>-0.0216</b>    | -0.1136          | -0.4719           | <b>0.0072</b> | 37 ± 9     | 36 ± 4     | 31 ± 6     | 79 ± 16     |
| 210706_s_at | RNF24    | ring finger protein 24                                     | 0.4464           | <b>-0.0308</b>    | 0.1965           | -0.2842           | 0.2294        | 535 ± 33   | 497 ± 51   | 554 ± 29   | 634 ± 65    |
| 203160_s_at | RNF8     | ring finger protein 8                                      | <b>0.0158</b>    | -0.2849           | -0.2667          | 0.4711            | 0.3334        | 487 ± 18   | 444 ± 24   | 453 ± 31   | 526 ± 54    |
| 204207_s_at | RNGTT    | RNA guanylyltransferase and 5'-phosphatase                 | <b>0.0045</b>    | -0.1523           | 0.2768           | -0.2436           | 0.3457        | 196 ± 15   | 203 ± 16   | 196 ± 16   | 261 ± 56    |
| 211387_x_at | RNGTT    | RNA guanylyltransferase and 5'-phosphatase                 | 0.1952           | <b>-0.0283</b>    | 0.0856           | <b>-0.0485</b>    | 0.2043        | 235 ± 25   | 249 ± 32   | 336 ± 40   | 338 ± 69    |
| 212430_at   | RNPC1    | RNA-binding region containing 1                            | <b>0.0016</b>    | <b>-0.0538</b>    | 0.2544           | -0.2201           | 0.1628        | 324 ± 39   | 390 ± 42   | 446 ± 29   | 478 ± 86    |
| 218301_at   | RNPEPL1  | arginyl aminopeptidase -like 1                             | <b>0.0413</b>    | <b>-0.0314</b>    | -0.4549          | -0.2899           | 0.1225        | 241 ± 34   | 239 ± 32   | 305 ± 18   | 348 ± 53    |
| 210230_at   | RNU2     | RNA, U2 small nuclear                                      | <b>0.0326</b>    | -0.1111           | <b>0.0421</b>    | -0.3610           | 0.4191        | 164 ± 45   | 273 ± 83   | 334 ± 95   | 419 ± 194   |

| Probe set   | Name    | Description                                                 | NFT <sub>0</sub> | MMSE <sub>0</sub> | NFT <sub>1</sub> | MMSE <sub>1</sub> | ANOVA         | Control     | Incipient    | Moderate    | Severe      |
|-------------|---------|-------------------------------------------------------------|------------------|-------------------|------------------|-------------------|---------------|-------------|--------------|-------------|-------------|
| 214349_at   | RNU2    | RNA, U2 small nuclear                                       | 0.3170           | <b>-0.0059</b>    | -0.3167          | 0.1602            | <b>0.0021</b> | 161 ± 16    | 108 ± 12     | 167 ± 15    | 227 ± 26    |
| 213044_at   | ROCK1   | Rho-associated, coiled-coil containing protein kinase 1     | 0.0912           | <b>-0.0066</b>    | -0.2032          | <b>-0.0507</b>    | 0.0977        | 1312 ± 131  | 1316 ± 87    | 1642 ± 116  | 1592 ± 111  |
| 214697_s_at | ROD1    | ROD1 regulator of differentiation 1                         | <b>0.0344</b>    | -0.1326           | <b>0.0389</b>    | -0.1794           | 0.4233        | 63 ± 8      | 76 ± 12      | 67 ± 14     | 92 ± 17     |
| 207569_at   | ROS1    | v-ros UR2 sarcoma virus oncogene homolog 1                  | 0.2563           | <b>-0.0038</b>    | 0.1150           | 0.2559            | <b>0.0252</b> | 97 ± 8      | 87 ± 10      | 115 ± 8     | 145 ± 22    |
| 206169_x_at | RoXaN   | ubiquitous tetratricopeptide containing protein RoXaN       | <b>0.0425</b>    | -0.0857           | <b>0.0190</b>    | -0.2736           | 0.1373        | 266 ± 33    | 380 ± 84     | 450 ± 54    | 399 ± 60    |
| 213323_s_at | RoXaN   | ubiquitous tetratricopeptide containing protein RoXaN       | 0.0646           | <b>-0.0040</b>    | -0.4739          | -0.2781           | <b>0.0081</b> | 392 ± 38    | 395 ± 23     | 417 ± 35    | 637 ± 90    |
| 205191_at   | RP2     | retinitis pigmentosa 2                                      | 0.1129           | <b>-0.0490</b>    | -0.4458          | -0.3696           | 0.0698        | 85 ± 13     | 93 ± 9       | 131 ± 16    | 112 ± 10    |
| 209317_at   | RPA40   | RNA polymerase I subunit                                    | <b>0.0131</b>    | -0.6938           | 0.1284           | 0.3046            | 0.7692        | 331 ± 30    | 344 ± 43     | 365 ± 23    | 376 ± 38    |
| 207515_s_at | RPA40   | RNA polymerase I subunit                                    | <b>0.0081</b>    | <b>-0.0308</b>    | 0.3626           | 0.1519            | 0.0682        | 322 ± 23    | 289 ± 12     | 360 ± 26    | 437 ± 65    |
| 210573_s_at | RPC62   | polymerase III                                              | 0.1680           | <b>-0.0280</b>    | 0.2938           | -0.2901           | <b>0.0138</b> | 225 ± 19    | 273 ± 35     | 246 ± 25    | 377 ± 46    |
| 206608_s_at | RPGRIP1 | retinitis pigmentosa GTPase regulator interacting protein 1 | 0.1067           | <b>-0.0091</b>    | 0.4838           | -0.1302           | <b>0.0166</b> | 197 ± 25    | 229 ± 13     | 193 ± 16    | 327 ± 55    |
| 200725_x_at | RPL10   | ribosomal protein L10                                       | <b>0.0003</b>    | -0.1119           | 0.3732           | -0.4860           | 0.2923        | 5597 ± 425  | 6042 ± 561   | 6726 ± 452  | 6950 ± 795  |
| 214351_x_at | RPL13   | ribosomal protein L13                                       | 0.0760           | <b>-0.0006</b>    | 0.3465           | -0.3248           | <b>0.0106</b> | 2993 ± 328  | 2828 ± 223   | 3566 ± 113  | 4058 ± 219  |
| 212933_x_at | RPL13   | ribosomal protein L13                                       | <b>0.0008</b>    | <b>-0.0258</b>    | <b>0.0261</b>    | 0.3873            | 0.0595        | 7513 ± 381  | 8578 ± 982   | 9468 ± 458  | 10087 ± 800 |
| 208929_x_at | RPL13   | ribosomal protein L13                                       | <b>0.0381</b>    | <b>-0.0359</b>    | <b>0.0369</b>    | 0.4147            | 0.0945        | 6899 ± 609  | 8068 ± 1226  | 8219 ± 239  | 10016 ± 972 |
| 212790_x_at | RPL13A  | ribosomal protein L13a                                      | <b>0.0306</b>    | -0.2866           | 0.4988           | 0.1618            | 0.1938        | 13630 ± 429 | 12677 ± 858  | 15136 ± 817 | 13971 ± 972 |
| 210646_x_at | RPL13A  | ribosomal protein L13a                                      | <b>0.0475</b>    | -0.1785           | -0.3915          | 0.3537            | 0.2442        | 15391 ± 767 | 14525 ± 824  | 16888 ± 817 | 16198 ± 913 |
| 200715_x_at | RPL13A  | ribosomal protein L13a                                      | <b>0.0009</b>    | <b>-0.0003</b>    | 0.1337           | 0.2796            | <b>0.0004</b> | 2416 ± 99   | 2801 ± 288   | 3103 ± 293  | 4234 ± 331  |
| 200022_at   | RPL18   | ribosomal protein L18                                       | <b>0.0171</b>    | -0.2639           | -0.2083          | -0.3094           | 0.5468        | 4784 ± 300  | 4818 ± 203   | 5286 ± 88   | 5108 ± 407  |
| 213642_at   | RPL27   | ribosomal protein L27                                       | 0.0821           | <b>-0.0035</b>    | 0.0880           | -0.1178           | <b>0.0125</b> | 304 ± 30    | 377 ± 36     | 394 ± 14    | 539 ± 85    |
| 212044_s_at | RPL27A  | ribosomal protein L27a                                      | 0.1105           | <b>-0.0133</b>    | 0.1608           | -0.2125           | <b>0.0158</b> | 336 ± 32    | 376 ± 44     | 353 ± 15    | 517 ± 63    |
| 200003_s_at | RPL28   | ribosomal protein L28                                       | <b>0.0400</b>    | -0.5973           | -0.4237          | -0.3188           | 0.2660        | 6713 ± 424  | 6945 ± 420   | 8190 ± 391  | 6931 ± 996  |
| 201429_s_at | RPL37A  | ribosomal protein L37a                                      | <b>0.0472</b>    | -0.1013           | 0.4372           | 0.4316            | 0.3401        | 9166 ± 1869 | 10157 ± 2225 | 1157 ± 1461 | 4277 ± 3380 |
| 214041_x_at | RPL37A  | ribosomal protein L37a                                      | <b>0.0023</b>    | <b>-0.0101</b>    | 0.2570           | -0.2179           | <b>0.0355</b> | 700 ± 67    | 962 ± 216    | 1143 ± 93   | 1689 ± 418  |
| 221943_x_at | RPL38   | ribosomal protein L38                                       | 0.1029           | <b>-0.0059</b>    | -0.4825          | -0.2224           | 0.0685        | 1826 ± 197  | 1930 ± 278   | 1966 ± 65   | 2624 ± 291  |
| 202028_s_at | RPL38   | ribosomal protein L38                                       | 0.1085           | <b>-0.0447</b>    | 0.3882           | -0.2593           | <b>0.0344</b> | 1186 ± 105  | 1314 ± 160   | 1114 ± 44   | 1667 ± 183  |
| 208695_s_at | RPL39   | ribosomal protein L39                                       | <b>0.0024</b>    | <b>-0.0154</b>    | -0.2328          | -0.0623           | 0.0702        | 12858 ± 725 | 12490 ± 725  | 15140 ± 764 | 14521 ± 936 |
| 200089_s_at | RPL4    | ribosomal protein L4                                        | <b>0.0164</b>    | -0.2430           | 0.2975           | 0.3698            | <b>0.0167</b> | 5922 ± 227  | 5918 ± 255   | 7235 ± 393  | 6300 ± 356  |
| 210034_s_at | RPL5    | ribosomal protein L5                                        | -0.9684          | <b>-0.0177</b>    | 0.0748           | <b>-0.0500</b>    | 0.4285        | 81 ± 9      | 90 ± 7       | 92 ± 13     | 111 ± 20    |
| 213080_x_at | RPL5    | ribosomal protein L5                                        | <b>0.0000</b>    | <b>-0.0011</b>    | 0.4544           | -0.2809           | <b>0.0074</b> | 8949 ± 548  | 8805 ± 334   | 10816 ± 540 | 10998 ± 602 |
| 200909_s_at | RPLP2   | ribosomal protein, large P2                                 | <b>0.0314</b>    | -0.1173           | -0.1384          | -0.4765           | 0.2375        | 5678 ± 292  | 5163 ± 197   | 6380 ± 415  | 6217 ± 671  |
| 220113_x_at | Rpo1-2  | similar to DNA-directed RNA polymerase I                    | 0.0667           | <b>-0.0032</b>    | 0.0672           | <b>-0.0129</b>    | <b>0.0427</b> | 902 ± 86    | 997 ± 95     | 1427 ± 189  | 1444 ± 235  |
| 214001_x_at | RPS10   | ribosomal protein S10                                       | <b>0.0045</b>    | <b>-0.0073</b>    | 0.0694           | <b>-0.0138</b>    | <b>0.0169</b> | 227 ± 34    | 364 ± 52     | 319 ± 29    | 477 ± 82    |
| 202649_x_at | RPS19   | ribosomal protein S19                                       | <b>0.0259</b>    | -0.0560           | 0.2630           | -0.2296           | 0.4124        | 6922 ± 444  | 7046 ± 500   | 7827 ± 439  | 7929 ± 727  |
| 213414_s_at | RPS19   | ribosomal protein S19                                       | <b>0.0216</b>    | <b>-0.0189</b>    | -0.1150          | -0.3807           | 0.2190        | 8397 ± 545  | 7998 ± 597   | 8966 ± 388  | 9804 ± 858  |
| 208903_at   | RPS28   | ribosomal protein S28                                       | <b>0.0054</b>    | -0.2684           | -0.0993          | 0.2320            | 0.3472        | 652 ± 27    | 717 ± 84     | 698 ± 47    | 793 ± 61    |
| 213347_x_at | RPS4X   | ribosomal protein S4, X-linked                              | <b>0.0207</b>    | -0.1661           | 0.1692           | 0.3259            | <b>0.0430</b> | 10105 ± 387 | 11438 ± 817  | 12669 ± 774 | 11631 ± 483 |
| 203379_at   | RPS6KA1 | ribosomal protein S6 kinase, 90kDa, polypeptide 1           | <b>0.0073</b>    | <b>-0.0290</b>    | 0.3845           | -0.1808           | 0.0977        | 346 ± 68    | 350 ± 38     | 576 ± 70    | 583 ± 142   |
| 204635_at   | RPS6KA5 | ribosomal protein S6 kinase, 90kDa, polypeptide 5           | 0.9404           | <b>-0.0281</b>    | -0.4216          | -0.0710           | 0.0763        | 635 ± 21    | 795 ± 79     | 705 ± 72    | 869 ± 71    |
| 204633_s_at | RPS6KA5 | ribosomal protein S6 kinase, 90kDa, polypeptide 5           | <b>0.0388</b>    | <b>-0.0032</b>    | -0.1274          | -0.1023           | 0.0742        | 854 ± 48    | 946 ± 105    | 1126 ± 101  | 1139 ± 103  |
| 201204_s_at | RRBP1   | ribosome binding protein 1 homolog 180kDa                   | <b>0.0020</b>    | <b>-0.0366</b>    | 0.3385           | -0.2930           | <b>0.0485</b> | 611 ± 119   | 841 ± 164    | 1277 ± 140  | 1190 ± 282  |
| 203704_s_at | RREB1   | ras responsive element binding protein 1                    | 0.1249           | <b>-0.0122</b>    | 0.2622           | -0.1804           | <b>0.0544</b> | 278 ± 32    | 315 ± 27     | 347 ± 10    | 407 ± 48    |

| Probe set   | Name     | Description                                           | NFT <sub>0</sub> | MMSE <sub>0</sub> | NFT <sub>1</sub> | MMSE <sub>1</sub> | ANOVA         | Control    | Incipient  | Moderate   | Severe     |
|-------------|----------|-------------------------------------------------------|------------------|-------------------|------------------|-------------------|---------------|------------|------------|------------|------------|
| 209527_at   | RRP4     | homolog of Yeast RRP4 , 3'-5'-exoribonuclease         | <b>0.0298</b>    | -0.1503           | -0.1453          | 0.2872            | 0.1576        | 334 ± 14   | 291 ± 14   | 382 ± 45   | 390 ± 45   |
| 222368_at   | RU2      | RU2S                                                  | <b>0.0018</b>    | <b>-0.0404</b>    | 0.1196           | -0.4033           | <b>0.0483</b> | 729 ± 88   | 946 ± 135  | 874 ± 67   | 1678 ± 486 |
| 218243_at   | RUFY1    | RUN and FYVE domain-containing 1                      | <b>0.0314</b>    | <b>-0.0162</b>    | 0.3917           | 0.3117            | <b>0.0481</b> | 1108 ± 76  | 1113 ± 130 | 1163 ± 45  | 1508 ± 159 |
| 216994_s_at | RUNX2    | runt-related transcription factor 2                   | 0.0766           | <b>-0.0420</b>    | 0.2358           | <b>-0.0082</b>    | 0.1172        | 103 ± 15   | 136 ± 21   | 122 ± 20   | 181 ± 34   |
| 209148_at   | RXRB     | retinoid X receptor, beta                             | <b>0.0056</b>    | -0.3866           | <b>0.0000</b>    | -0.2507           | 0.1774        | 859 ± 39   | 981 ± 58   | 1037 ± 51  | 975 ± 90   |
| 205954_at   | RXRG     | retinoid X receptor, gamma                            | <b>0.0168</b>    | <b>-0.0065</b>    | 0.2179           | 0.4743            | <b>0.0058</b> | 160 ± 16   | 194 ± 21   | 201 ± 10   | 251 ± 18   |
| 201846_s_at | RYBP     | RING1 and YY1 binding protein                         | <b>0.0121</b>    | <b>-0.0031</b>    | -0.4537          | -0.2667           | <b>0.0212</b> | 712 ± 65   | 799 ± 72   | 869 ± 66   | 1044 ± 78  |
| 201844_s_at | RYBP     | RING1 and YY1 binding protein                         | <b>0.0457</b>    | <b>-0.0454</b>    | 0.3750           | 0.3441            | <b>0.0022</b> | 1330 ± 164 | 1487 ± 190 | 1111 ± 54  | 2029 ± 142 |
| 214172_x_at | RYK      | RYK receptor-like tyrosine kinase                     | 0.5209           | <b>-0.0458</b>    | 0.4641           | -0.3741           | 0.3495        | 178 ± 19   | 175 ± 17   | 196 ± 15   | 222 ± 27   |
| 205863_at   | S100A12  | S100 calcium binding protein A12                      | 0.4581           | <b>-0.0009</b>    | -0.4202          | -0.2978           | <b>0.0230</b> | 150 ± 28   | 120 ± 17   | 166 ± 17   | 285 ± 64   |
| 208540_x_at | S100A14  | S100 calcium binding protein A14                      | 0.1051           | <b>-0.0343</b>    | -0.0895          | 0.3152            | <b>0.0153</b> | 560 ± 60   | 506 ± 14   | 514 ± 49   | 753 ± 67   |
| 203186_s_at | S100A4   | S100 calcium binding protein A4                       | 0.2738           | <b>-0.0267</b>    | 0.4680           | <b>-0.0031</b>    | 0.2427        | 176 ± 49   | 270 ± 80   | 312 ± 62   | 386 ± 93   |
| 217946_s_at | SAE1     | SUMO-1 activating enzyme subunit 1                    | <b>0.0190</b>    | -0.3629           | 0.0755           | -0.4510           | 0.5748        | 890 ± 41   | 909 ± 40   | 985 ± 56   | 959 ± 74   |
| 213635_s_at | SAFB     | scaffold attachment factor B                          | <b>0.0072</b>    | <b>-0.0010</b>    | 0.2105           | -0.2087           | <b>0.0156</b> | 122 ± 12   | 135 ± 18   | 166 ± 11   | 201 ± 28   |
| 213283_s_at | SALL2    | sal-like 2                                            | <b>0.0138</b>    | <b>-0.0267</b>    | 0.3549           | 0.4857            | <b>0.0426</b> | 1603 ± 122 | 1758 ± 94  | 1682 ± 115 | 2089 ± 138 |
| 204900_x_at | SAP30    | sin3-associated polypeptide, 30kDa                    | 0.9324           | <b>-0.0208</b>    | -0.3346          | -0.2982           | 0.1064        | 446 ± 21   | 468 ± 67   | 432 ± 50   | 625 ± 91   |
| 200051_at   | SART1    | squamous cell carcinoma antigen recognised by T cells | <b>0.0041</b>    | <b>-0.0332</b>    | 0.3963           | 0.3809            | 0.1055        | 459 ± 33   | 485 ± 55   | 578 ± 49   | 620 ± 69   |
| 218854_at   | SART2    | squamous cell carcinoma antigen recognized by T cell  | 0.6623           | <b>-0.0154</b>    | -0.0957          | -0.1797           | 0.1772        | 256 ± 26   | 244 ± 33   | 261 ± 26   | 334 ± 24   |
| 203227_s_at | SAS      | sarcoma amplified sequence                            | 0.1117           | <b>-0.0446</b>    | <b>0.0468</b>    | <b>-0.0322</b>    | 0.1945        | 1098 ± 106 | 1315 ± 150 | 1433 ± 99  | 1431 ± 159 |
| 218143_s_at | SCAMP2   | secretory carrier membrane protein 2                  | <b>0.0055</b>    | <b>-0.0195</b>    | 0.3385           | -0.2880           | 0.0722        | 743 ± 65   | 843 ± 66   | 856 ± 40   | 1083 ± 153 |
| 201771_at   | SCAMP3   | secretory carrier membrane protein 3                  | 0.6291           | <b>-0.0126</b>    | -0.0764          | 0.4019            | 0.0953        | 899 ± 80   | 827 ± 42   | 971 ± 88   | 1126 ± 80  |
| 201819_at   | SCARB1   | scavenger receptor class B, member 1                  | 0.3737           | <b>-0.0220</b>    | <b>0.0549</b>    | -0.1425           | <b>0.0429</b> | 547 ± 34   | 559 ± 26   | 517 ± 37   | 685 ± 60   |
| 59705_at    | SCLY     | putative selenocysteine lyase                         | 0.1838           | <b>-0.0444</b>    | <b>0.0003</b>    | -0.2152           | <b>0.0233</b> | 108 ± 6    | 139 ± 12   | 118 ± 12   | 151 ± 10   |
| 212556_at   | SCRIB    | scribble                                              | <b>0.0150</b>    | <b>-0.0517</b>    | 0.3018           | -0.4003           | 0.2333        | 708 ± 71   | 756 ± 119  | 828 ± 62   | 1023 ± 182 |
| 221513_s_at | SDCCAG16 | serologically defined colon cancer antigen 16         | 0.0572           | <b>-0.0409</b>    | 0.1271           | -0.4150           | 0.3428        | 301 ± 9    | 281 ± 15   | 326 ± 19   | 346 ± 44   |
| 218427_at   | SDCCAG3  | serologically defined colon cancer antigen 3          | <b>0.0432</b>    | <b>-0.0235</b>    | -0.1022          | -0.2134           | 0.2393        | 250 ± 38   | 239 ± 13   | 298 ± 41   | 328 ± 26   |
| 212609_s_at | SDCCAG8  | serologically defined colon cancer antigen 8          | <b>0.0423</b>    | -0.2550           | 0.1802           | 0.4689            | 0.3989        | 936 ± 79   | 979 ± 78   | 1105 ± 107 | 1100 ± 38  |
| 221621_at   | SEC14L1  | SEC14-like 1                                          | 0.2649           | <b>-0.0188</b>    | <b>0.0533</b>    | <b>-0.0364</b>    | 0.0882        | 135 ± 14   | 141 ± 10   | 140 ± 11   | 196 ± 31   |
| 204541_at   | SEC14L2  | SEC14-like 2                                          | <b>0.0028</b>    | <b>-0.0011</b>    | 0.1077           | 0.2310            | <b>0.0006</b> | 191 ± 16   | 184 ± 21   | 289 ± 23   | 321 ± 34   |
| 218703_at   | SEC22A   | sec22 homolog                                         | 0.2462           | <b>-0.0275</b>    | 0.1275           | 0.2372            | 0.1031        | 148 ± 16   | 148 ± 22   | 151 ± 16   | 212 ± 28   |
| 212900_at   | SEC24A   | SEC24 related gene family, member A                   | 0.2023           | <b>-0.0090</b>    | 0.1276           | -0.0804           | 0.0915        | 548 ± 47   | 563 ± 78   | 647 ± 50   | 767 ± 83   |
| 202361_at   | SEC24C   | SEC24 related gene family, member C                   | <b>0.0439</b>    | <b>-0.0408</b>    | -0.0916          | 0.3909            | 0.1990        | 606 ± 33   | 593 ± 27   | 693 ± 64   | 728 ± 67   |
| 201915_at   | SEC63L   | SEC63 protein                                         | <b>0.0064</b>    | -0.3697           | 0.2389           | -0.3916           | 0.2029        | 172 ± 14   | 206 ± 19   | 184 ± 15   | 217 ± 17   |
| 201914_s_at | SEC63L   | SEC63 protein                                         | 0.0650           | <b>-0.0238</b>    | <b>0.0097</b>    | -0.4574           | <b>0.0479</b> | 230 ± 6    | 244 ± 25   | 292 ± 12   | 322 ± 42   |
| 213716_s_at | SECTM1   | secreted and transmembrane 1                          | 0.6746           | <b>-0.0168</b>    | 0.2184           | -0.4093           | 0.2470        | 118 ± 23   | 102 ± 8    | 138 ± 38   | 270 ± 120  |
| 204563_at   | SELL     | selectin L                                            | 0.1906           | <b>-0.0181</b>    | 0.2189           | -0.2847           | 0.0964        | 250 ± 35   | 309 ± 45   | 290 ± 48   | 427 ± 68   |
| 203071_at   | SEMA3B   | sema domain 3B                                        | <b>0.0018</b>    | <b>-0.0242</b>    | <b>0.0215</b>    | 0.2637            | <b>0.0544</b> | 472 ± 63   | 647 ± 128  | 701 ± 107  | 1161 ± 327 |
| 203788_s_at | SEMA3C   | sema domain 3C                                        | <b>0.0015</b>    | <b>-0.0438</b>    | 0.1701           | -0.3260           | 0.0616        | 173 ± 14   | 191 ± 22   | 201 ± 12   | 277 ± 50   |
| 35666_at    | SEMA3F   | sema domain 3F                                        | 0.4129           | <b>-0.0220</b>    | -0.2913          | 0.4963            | 0.0729        | 520 ± 48   | 490 ± 68   | 469 ± 40   | 702 ± 93   |
| 46665_at    | SEMA4C   | sema domain 4C                                        | <b>0.0019</b>    | <b>-0.0183</b>    | 0.2383           | -0.1388           | 0.0865        | 1383 ± 103 | 1781 ± 331 | 1934 ± 186 | 2537 ± 544 |
| 208124_s_at | SEMA4F   | sema domain 4F                                        | <b>0.0145</b>    | -0.1111           | 0.1946           | 0.3547            | 0.4600        | 300 ± 14   | 298 ± 18   | 312 ± 12   | 346 ± 40   |
| 219194_at   | SEMA4G   | sema domain 4G                                        | <b>0.0297</b>    | <b>-0.0307</b>    | 0.0967           | -0.0836           | 0.0678        | 403 ± 35   | 465 ± 49   | 457 ± 56   | 654 ± 112  |

| Probe set   | Name     | Description                                                   | NFT <sub>0</sub> | MMSE <sub>0</sub> | NFT <sub>1</sub> | MMSE <sub>1</sub> | ANOVA         | Control     | Incipient  | Moderate    | Severe      |
|-------------|----------|---------------------------------------------------------------|------------------|-------------------|------------------|-------------------|---------------|-------------|------------|-------------|-------------|
| 215114_at   | SENP3    | sentrin/SUMO-specific protease 3                              | <b>0.0403</b>    | -0.1066           | 0.0943           | -0.2966           | 0.3214        | 136 ± 14    | 167 ± 27   | 160 ± 27    | 194 ± 21    |
| 201427_s_at | SEPP1    | selenoprotein P, plasma, 1                                    | 0.6326           | <b>-0.0097</b>    | -0.1597          | -0.1533           | 0.1292        | 7932 ± 1018 | 7599 ± 949 | 1772 ± 2027 | 1178 ± 1761 |
| 202376_at   | SERPINA3 | serine proteinase inhibitor, clade A, member 3                | 0.0641           | <b>-0.0200</b>    | -0.0574          | 0.4556            | 0.1254        | 4750 ± 1534 | 3185 ± 873 | 1737 ± 2013 | 9225 ± 2380 |
| 213874_at   | SERPINA4 | serine proteinase inhibitor, clade A, member 4                | 0.0581           | <b>-0.0033</b>    | 0.2556           | 0.4354            | <b>0.0087</b> | 170 ± 14    | 165 ± 26   | 206 ± 21    | 284 ± 35    |
| 210413_x_at | SERPINB4 | serine proteinase inhibitor, clade B, member 4                | 0.3214           | <b>-0.0186</b>    | 0.3165           | -0.4704           | <b>0.0524</b> | 162 ± 12    | 152 ± 17   | 173 ± 20    | 244 ± 39    |
| 200986_at   | SERPING1 | serine proteinase inhibitor, clade G, member 1,               | 0.8450           | <b>-0.0262</b>    | -0.2840          | -0.2578           | <b>0.0455</b> | 406 ± 57    | 377 ± 48   | 364 ± 43    | 565 ± 34    |
| 207636_at   | SERPINI2 | serine proteinase inhibitor, clade I, member 2                | <b>0.0008</b>    | <b>-0.0082</b>    | 0.1503           | -0.1183           | <b>0.0534</b> | 158 ± 17    | 179 ± 34   | 202 ± 24    | 273 ± 42    |
| 210231_x_at | SET      | SET translocation                                             | 0.1671           | <b>-0.0221</b>    | -0.2090          | -0.0708           | 0.2605        | 3226 ± 134  | 3324 ± 187 | 3575 ± 116  | 3601 ± 189  |
| 213048_s_at | SET      | SET translocation                                             | <b>0.0357</b>    | <b>-0.0450</b>    | 0.2813           | <b>-0.0092</b>    | 0.2526        | 2167 ± 202  | 2368 ± 346 | 2853 ± 265  | 2679 ± 214  |
| 37462_i_at  | SF3A2    | splicing factor 3a, subunit 2, 66kDa                          | 0.1671           | <b>-0.0295</b>    | 0.0846           | 0.3454            | 0.1721        | 480 ± 33    | 570 ± 73   | 559 ± 39    | 669 ± 80    |
| 203818_s_at | SF3A3    | splicing factor 3a, subunit 3, 60kDa                          | <b>0.0254</b>    | <b>-0.0031</b>    | 0.2043           | -0.2822           | <b>0.0166</b> | 500 ± 21    | 518 ± 19   | 521 ± 21    | 595 ± 18    |
| 200688_at   | SF3B3    | splicing factor 3b, subunit 3, 130kDa                         | <b>0.0050</b>    | -0.0650           | 0.2027           | 0.1853            | 0.1305        | 479 ± 37    | 473 ± 46   | 539 ± 41    | 609 ± 50    |
| 33322_i_at  | SFN      | stratifin                                                     | <b>0.0105</b>    | <b>-0.0004</b>    | 0.2461           | <b>-0.0059</b>    | <b>0.0000</b> | 949 ± 44    | 1154 ± 24  | 1026 ± 46   | 1571 ± 140  |
| 33323_r_at  | SFN      | stratifin                                                     | <b>0.0137</b>    | <b>-0.0217</b>    | <b>0.0450</b>    | -0.3218           | <b>0.0213</b> | 503 ± 41    | 697 ± 77   | 689 ± 96    | 972 ± 154   |
| 202037_s_at | SFRP1    | secreted frizzled-related protein 1                           | <b>0.0284</b>    | -0.2193           | 0.3824           | -0.2465           | 0.3383        | 527 ± 57    | 699 ± 98   | 724 ± 97    | 696 ± 102   |
| 202035_s_at | SFRP1    | secreted frizzled-related protein 1                           | <b>0.0007</b>    | <b>-0.0031</b>    | <b>0.0197</b>    | <b>-0.0105</b>    | <b>0.0265</b> | 47 ± 5      | 70 ± 8     | 71 ± 6      | 95 ± 19     |
| 204051_s_at | SFRP4    | secreted frizzled-related protein 4                           | 0.3782           | <b>-0.0463</b>    | 0.1317           | -0.2424           | 0.4631        | 213 ± 26    | 215 ± 22   | 241 ± 14    | 259 ± 20    |
| 202775_s_at | SFRS8    | splicing factor, arginine/serine-rich 8                       | 0.0646           | <b>-0.0284</b>    | 0.2639           | 0.1393            | 0.0695        | 995 ± 57    | 970 ± 98   | 1035 ± 124  | 1449 ± 215  |
| 38691_s_at  | SFTPC    | surfactant, pulmonary-associated protein C                    | <b>0.0087</b>    | <b>-0.0129</b>    | 0.1265           | -0.1077           | <b>0.0249</b> | 421 ± 45    | 612 ± 70   | 580 ± 76    | 771 ± 114   |
| 201739_at   | SGK      | serum/glucocorticoid regulated kinase                         | 0.5440           | <b>-0.0260</b>    | -0.2537          | <b>-0.0234</b>    | 0.2301        | 3269 ± 434  | 3649 ± 399 | 4770 ± 682  | 4333 ± 684  |
| 220357_s_at | SGK2     | serum/glucocorticoid regulated kinase 2                       | 0.1788           | <b>-0.0397</b>    | <b>0.0204</b>    | 0.4107            | 0.0981        | 263 ± 11    | 335 ± 55   | 304 ± 26    | 400 ± 55    |
| 212322_at   | SGPL1    | sphingosine-1-phosphate lyase 1                               | 0.1367           | <b>-0.0029</b>    | -0.3805          | -0.4287           | 0.0904        | 622 ± 55    | 665 ± 58   | 766 ± 57    | 874 ± 114   |
| 212321_at   | SGPL1    | sphingosine-1-phosphate lyase 1                               | <b>0.0111</b>    | <b>0.0000</b>     | 0.2744           | -0.1147           | <b>0.0021</b> | 489 ± 37    | 555 ± 42   | 668 ± 30    | 723 ± 61    |
| 201396_s_at | SGT      | small glutamine-rich tetratricopeptide repeat -containing     | <b>0.0021</b>    | <b>-0.0531</b>    | <b>0.0538</b>    | 0.3991            | 0.1722        | 324 ± 21    | 365 ± 83   | 391 ± 45    | 552 ± 120   |
| 209370_s_at | SH3BP2   | SH3-domain binding protein 2                                  | <b>0.0090</b>    | <b>-0.0046</b>    | 0.2362           | -0.3518           | <b>0.0243</b> | 318 ± 40    | 417 ± 56   | 571 ± 64    | 778 ± 192   |
| 205636_at   | SH3GL3   | SH3-domain GRB2-like 3                                        | <b>0.0211</b>    | <b>-0.0303</b>    | 0.4552           | 0.1000            | <b>0.0247</b> | 222 ± 19    | 193 ± 16   | 209 ± 23    | 362 ± 75    |
| 46323_at    | SHAPY    | apyrase                                                       | <b>0.0144</b>    | -0.0552           | 0.2770           | 0.3441            | 0.1703        | 472 ± 25    | 479 ± 27   | 521 ± 27    | 550 ± 25    |
| 201996_s_at | SHARP    | SMART/HDAC1 associated repressor protein                      | <b>0.0089</b>    | <b>-0.0115</b>    | -0.2994          | -0.1248           | <b>0.0238</b> | 233 ± 26    | 238 ± 19   | 276 ± 23    | 357 ± 44    |
| 201997_s_at | SHARP    | SMART/HDAC1 associated repressor protein                      | <b>0.0048</b>    | <b>-0.0297</b>    | -0.2410          | 0.2854            | 0.1376        | 1487 ± 108  | 1534 ± 197 | 1671 ± 131  | 1955 ± 155  |
| 214853_s_at | SHC1     | SHC transforming protein 1                                    | 0.2562           | <b>-0.0371</b>    | -0.3108          | 0.2533            | 0.0865        | 1057 ± 105  | 786 ± 51   | 1094 ± 97   | 1239 ± 156  |
| 221519_at   | SHFM3    | split hand/foot malformation type 3                           | <b>0.0116</b>    | <b>-0.0068</b>    | <b>0.0149</b>    | -0.1847           | <b>0.0400</b> | 1267 ± 89   | 1570 ± 221 | 1781 ± 166  | 1963 ± 217  |
| 214096_s_at | SHMT2    | serine hydroxymethyltransferase 2                             | <b>0.0171</b>    | -0.2061           | 0.4016           | 0.4485            | 0.4974        | 887 ± 59    | 857 ± 35   | 1000 ± 84   | 1020 ± 133  |
| 203759_at   | SIAT4C   | sialyltransferase 4C                                          | <b>0.0119</b>    | <b>-0.0034</b>    | 0.2510           | -0.1040           | <b>0.0158</b> | 162 ± 17    | 172 ± 23   | 256 ± 21    | 270 ± 45    |
| 220937_s_at | SIAT7D   | sialyltransferase 7D                                          | 0.4560           | <b>-0.0035</b>    | <b>0.0278</b>    | <b>-0.0050</b>    | 0.0731        | 99 ± 8      | 109 ± 11   | 112 ± 7     | 130 ± 6     |
| 210073_at   | SIAT8A   | sialyltransferase 8A                                          | <b>0.0492</b>    | -0.3977           | -0.3620          | 0.3443            | 0.5285        | 131 ± 13    | 116 ± 12   | 144 ± 19    | 146 ± 18    |
| 213485_s_at | SIMRP7   | multidrug resistance-associated protein 7                     | <b>0.0175</b>    | -0.2048           | 0.1870           | -0.4495           | 0.4536        | 763 ± 75    | 878 ± 166  | 886 ± 59    | 1030 ± 157  |
| 220605_s_at | SIRT2    | sirtuin silent mating type information regulation 2 homolog 2 | <b>0.0142</b>    | -0.0951           | -0.2493          | 0.3597            | 0.3275        | 1964 ± 166  | 2090 ± 184 | 2263 ± 191  | 2694 ± 527  |
| 219613_s_at | SIRT6    | sirtuin silent mating type information regulation 2 homolog 6 | 0.1807           | <b>-0.0189</b>    | <b>-0.0146</b>   | -0.4220           | <b>0.0150</b> | 343 ± 44    | 300 ± 49   | 315 ± 12    | 490 ± 45    |
| 218797_s_at | SIRT7    | sirtuin silent mating type information regulation 2 homolog 7 | <b>0.0161</b>    | <b>-0.0016</b>    | -0.3114          | -0.1519           | <b>0.0416</b> | 352 ± 39    | 362 ± 31   | 422 ± 33    | 489 ± 34    |
| 202782_s_at | SKIP     | skeletal muscle and kidney enriched inositol phosphatase      | 0.6078           | <b>-0.0005</b>    | <b>0.0337</b>    | -0.0870           | <b>0.0078</b> | 568 ± 24    | 568 ± 35   | 575 ± 36    | 720 ± 25    |
| 214734_at   | SLAC2-B  | SLAC2-B                                                       | <b>0.0024</b>    | <b>-0.0017</b>    | -0.4069          | -0.2589           | <b>0.0025</b> | 374 ± 45    | 433 ± 30   | 428 ± 28    | 629 ± 66    |
| 206181_at   | SLAM     | signaling lymphocytic activation molecule                     | 0.2031           | <b>-0.0004</b>    | <b>0.0027</b>    | -0.1306           | <b>0.0083</b> | 86 ± 8      | 127 ± 17   | 125 ± 11    | 164 ± 20    |

| Probe set   | Name     | Description                                                  | NFT <sub>0</sub> | MMSE <sub>0</sub> | NFT <sub>1</sub> | MMSE <sub>1</sub> | ANOVA         | Control    | Incipient  | Moderate   | Severe     |
|-------------|----------|--------------------------------------------------------------|------------------|-------------------|------------------|-------------------|---------------|------------|------------|------------|------------|
| 217507_at   | SLC11A1  | solute carrier family 11 , member 1                          | 0.1333           | <b>-0.0248</b>    | 0.3909           | 0.0671            | <b>0.0028</b> | 64 ± 13    | 88 ± 26    | 37 ± 8     | 182 ± 43   |
| 215274_at   | SLC12A3  | solute carrier family 12 , member 3                          | 0.1475           | <b>-0.0065</b>    | 0.2175           | <b>-0.0172</b>    | <b>0.0233</b> | 140 ± 14   | 174 ± 11   | 177 ± 25   | 250 ± 39   |
| 218066_at   | SLC12A7  | solute carrier family 12 , member 7                          | 0.0825           | <b>-0.0001</b>    | 0.0797           | -0.0827           | <b>0.0015</b> | 807 ± 80   | 842 ± 93   | 929 ± 79   | 1489 ± 199 |
| 220502_s_at | SLC13A1  | solute carrier family 13 , member 1                          | 0.2660           | <b>-0.0158</b>    | -0.4419          | 0.3546            | 0.0951        | 17 ± 4     | 20 ± 5     | 31 ± 1     | 35 ± 9     |
| 205856_at   | SLC14A1  | solute carrier family 14 , member 1                          | <b>0.0048</b>    | <b>-0.0001</b>    | <b>0.0407</b>    | -0.4844           | <b>0.0056</b> | 430 ± 69   | 517 ± 38   | 701 ± 91   | 1329 ± 326 |
| 211576_s_at | SLC19A1  | solute carrier family 19 , member 1                          | <b>0.0195</b>    | <b>0.0000</b>     | <b>0.0320</b>    | <b>-0.0004</b>    | <b>0.0007</b> | 209 ± 19   | 287 ± 25   | 344 ± 26   | 426 ± 52   |
| 210923_at   | SLC1A7   | solute carrier family 1 , member 7                           | 0.2220           | <b>-0.0490</b>    | 0.1444           | 0.4442            | 0.0581        | 295 ± 23   | 326 ± 41   | 301 ± 18   | 415 ± 46   |
| 210542_s_at | SLC21A11 | solute carrier family 21 , member 11                         | 0.8069           | <b>-0.0138</b>    | -0.4152          | -0.2062           | <b>0.0252</b> | 1000 ± 60  | 1067 ± 85  | 961 ± 58   | 1327 ± 126 |
| 219229_at   | SLC21A11 | solute carrier family 21 , member 11                         | <b>0.0137</b>    | <b>-0.0283</b>    | -0.2105          | -0.3714           | 0.1233        | 365 ± 43   | 389 ± 35   | 523 ± 75   | 493 ± 47   |
| 210010_s_at | SLC25A1  | solute carrier family 25 , member 1                          | <b>0.0456</b>    | <b>-0.0097</b>    | -0.2451          | 0.4273            | 0.1721        | 494 ± 61   | 549 ± 79   | 623 ± 41   | 762 ± 147  |
| 220474_at   | SLC25A21 | solute carrier family 25 , member 21                         | <b>0.0499</b>    | <b>-0.0323</b>    | 0.4538           | -0.4170           | <b>0.0470</b> | 19 ± 5     | 23 ± 5     | 46 ± 11    | 42 ± 7     |
| 205097_at   | SLC26A2  | solute carrier family 26 , member 2                          | -0.9853          | <b>-0.0327</b>    | -0.1505          | -0.1534           | 0.5196        | 197 ± 32   | 203 ± 17   | 232 ± 24   | 251 ± 36   |
| 204717_s_at | SLC29A2  | solute carrier family 29 , member 2                          | <b>0.0052</b>    | <b>-0.0049</b>    | -0.0903          | -0.4792           | <b>0.0369</b> | 95 ± 12    | 80 ± 15    | 133 ± 23   | 182 ± 42   |
| 201250_s_at | SLC2A1   | solute carrier family 2 , member 1                           | 0.3114           | <b>-0.0358</b>    | 0.4063           | 0.4693            | 0.1211        | 1655 ± 125 | 1782 ± 270 | 1626 ± 73  | 2257 ± 279 |
| 218494_s_at | SLC2A4RG | SLC2A4 regulator                                             | <b>0.0063</b>    | -0.0954           | 0.1320           | 0.3725            | 0.1217        | 236 ± 21   | 279 ± 32   | 312 ± 30   | 337 ± 41   |
| 219991_at   | SLC2A9   | solute carrier family 2 , member 9                           | <b>0.0184</b>    | <b>-0.0070</b>    | 0.1222           | 0.4332            | <b>0.0006</b> | 363 ± 28   | 432 ± 44   | 370 ± 21   | 601 ± 58   |
| 207440_at   | SLC35A2  | solute carrier family 35 , member 2                          | <b>0.0249</b>    | <b>-0.0186</b>    | 0.1983           | -0.4383           | <b>0.0232</b> | 110 ± 15   | 160 ± 23   | 188 ± 9    | 199 ± 34   |
| 209865_at   | SLC35A3  | solute carrier family 35 transporter), member 3              | <b>0.0515</b>    | <b>-0.0134</b>    | <b>0.0066</b>    | <b>-0.0023</b>    | <b>0.0002</b> | 78 ± 7     | 158 ± 10   | 140 ± 13   | 156 ± 15   |
| 218237_s_at | SLC38A1  | solute carrier family 38 , member 1                          | <b>0.0160</b>    | -0.0633           | 0.2943           | -0.1262           | 0.2556        | 1248 ± 44  | 1430 ± 134 | 1427 ± 134 | 1595 ± 143 |
| 210739_x_at | SLC4A4   | solute carrier family 4                                      | <b>0.0323</b>    | <b>-0.0514</b>    | 0.1752           | -0.1081           | 0.1841        | 692 ± 39   | 701 ± 42   | 739 ± 54   | 973 ± 193  |
| 209884_s_at | SLC4A7   | solute carrier family 4                                      | 0.4631           | <b>-0.0233</b>    | 0.2789           | -0.0568           | 0.1319        | 206 ± 19   | 242 ± 23   | 268 ± 28   | 298 ± 41   |
| 210854_x_at | SLC6A8   | solute carrier family 6 , member 8                           | <b>0.0049</b>    | <b>-0.0103</b>    | -0.3691          | -0.4310           | <b>0.0399</b> | 703 ± 48   | 654 ± 36   | 774 ± 37   | 874 ± 72   |
| 202219_at   | SLC6A8   | solute carrier family 6 , member 8                           | <b>0.0012</b>    | <b>-0.0366</b>    | -0.3476          | 0.4949            | 0.1024        | 2750 ± 308 | 2602 ± 148 | 3752 ± 414 | 4381 ± 986 |
| 201195_s_at | SLC7A5   | solute carrier family 7 , member 5                           | <b>0.0000</b>    | <b>-0.0011</b>    | 0.3759           | -0.0785           | <b>0.0150</b> | 1245 ± 84  | 1334 ± 81  | 1677 ± 108 | 1834 ± 225 |
| 203578_s_at | SLC7A6   | solute carrier family 7 , member 6                           | 0.2360           | <b>-0.0183</b>    | 0.2629           | 0.0989            | 0.1376        | 77 ± 8     | 83 ± 10    | 99 ± 10    | 110 ± 15   |
| 203579_s_at | SLC7A6   | solute carrier family 7 , member 6                           | <b>0.0120</b>    | <b>-0.0325</b>    | 0.1937           | -0.4160           | <b>0.0275</b> | 188 ± 11   | 164 ± 18   | 212 ± 20   | 285 ± 46   |
| 208039_at   | SLC9A2   | solute carrier family 9 , isoform 2                          | <b>0.0058</b>    | <b>-0.0275</b>    | 0.3509           | -0.3496           | <b>0.0523</b> | 164 ± 18   | 196 ± 26   | 205 ± 22   | 298 ± 57   |
| 206874_s_at | SLK      | Ste20-related serine/threonine kinase                        | <b>0.0460</b>    | -0.0917           | 0.0925           | -0.0662           | 0.2044        | 1396 ± 72  | 1624 ± 80  | 1750 ± 114 | 1717 ± 211 |
| 214850_at   | SMA3     | SMA3                                                         | <b>0.0021</b>    | -0.0652           | 0.1644           | -0.1777           | 0.1696        | 225 ± 36   | 312 ± 49   | 414 ± 92   | 535 ± 184  |
| 206565_x_at | SMA3     | SMA3                                                         | <b>0.0373</b>    | -0.1716           | 0.1287           | -0.2966           | 0.2043        | 286 ± 43   | 442 ± 67   | 507 ± 110  | 448 ± 80   |
| 215599_at   | SMA4     | SMA4                                                         | <b>0.0066</b>    | -0.2286           | 0.0725           | 0.4557            | 0.2346        | 322 ± 52   | 563 ± 158  | 987 ± 351  | 791 ± 317  |
| 201073_s_at | SMARCC1  | SWI/SNF rel., matrix assoc. actin dep. reg. of chromatin, c1 | <b>0.0162</b>    | -0.1204           | -0.2783          | <b>-0.0310</b>    | 0.4058        | 248 ± 36   | 293 ± 41   | 338 ± 19   | 319 ± 62   |
| 201320_at   | SMARCC2  | SWI/SNF rel., matrix assoc. actin dep. reg. of chromatin, c2 | <b>0.0011</b>    | -0.0747           | 0.3060           | <b>-0.0167</b>    | <b>0.0463</b> | 932 ± 107  | 1146 ± 57  | 1502 ± 98  | 1293 ± 259 |
| 201321_s_at | SMARCC2  | SWI/SNF rel., matrix assoc. actin dep. reg. of chromatin, c2 | <b>0.0045</b>    | <b>-0.0019</b>    | -0.4013          | -0.2896           | <b>0.0108</b> | 1161 ± 70  | 1090 ± 23  | 1549 ± 115 | 1656 ± 224 |
| 203183_s_at | SMARCD1  | SWI/SNF rel., matrix assoc. actin dep. reg. of chromatin, d1 | 0.2408           | <b>-0.0094</b>    | 0.3760           | 0.3416            | <b>0.0334</b> | 269 ± 21   | 253 ± 27   | 313 ± 23   | 390 ± 51   |
| 212152_x_at | SMARCF1  | SWI/SNF rel., matrix assoc. actin dep. reg. of chromatin, f1 | <b>0.0206</b>    | <b>-0.0483</b>    | 0.2636           | <b>-0.0423</b>    | <b>0.0443</b> | 1942 ± 116 | 2278 ± 95  | 2366 ± 123 | 2341 ± 130 |
| 201589_at   | SMC1L1   | SMC1 structural maintenance of chromosomes 1-like 1          | 0.3775           | <b>-0.0049</b>    | -0.2678          | <b>-0.0381</b>    | 0.1786        | 620 ± 69   | 730 ± 100  | 824 ± 99   | 873 ± 78   |
| 215623_x_at | SMC4L1   | SMC4 structural maintenance of chromosomes 4-like 1          | 0.9070           | <b>-0.0084</b>    | 0.2061           | -0.3477           | <b>0.0209</b> | 47 ± 5     | 54 ± 4     | 48 ± 9     | 84 ± 13    |
| 200739_s_at | SMT3H1   | SMT3 suppressor of mif two 3 homolog 1                       | <b>0.0229</b>    | -0.4166           | 0.3982           | -0.1993           | 0.3171        | 227 ± 18   | 238 ± 28   | 222 ± 17   | 315 ± 72   |
| 213139_at   | SNAI2    | snail homolog 2                                              | 0.1765           | <b>-0.0319</b>    | -0.4459          | -0.1751           | 0.3069        | 67 ± 8     | 67 ± 16    | 79 ± 10    | 97 ± 13    |
| 205443_at   | SNAPC1   | small nuclear RNA activating complex, polypeptide 1, 43kDa   | <b>0.0258</b>    | -0.3086           | <b>-0.0079</b>   | <b>0.0182</b>     | 0.2461        | 99 ± 12    | 79 ± 10    | 106 ± 8    | 116 ± 17   |
| 204104_at   | SNAPC2   | small nuclear RNA activating complex, polypeptide 2, 45kDa   | <b>0.0102</b>    | <b>-0.0008</b>    | 0.3018           | 0.1674            | <b>0.0007</b> | 158 ± 10   | 170 ± 15   | 262 ± 21   | 263 ± 33   |

| Probe set   | Name   | Description                                              | NFT <sub>0</sub> | MMSE <sub>0</sub> | NFT <sub>1</sub> | MMSE <sub>1</sub> | ANOVA         | Control    | Incipient  | Moderate   | Severe      |
|-------------|--------|----------------------------------------------------------|------------------|-------------------|------------------|-------------------|---------------|------------|------------|------------|-------------|
| 207474_at   | SNRK   | SNF-1 related kinase                                     | 0.6988           | <b>-0.0487</b>    | 0.0826           | <b>-0.0033</b>    | 0.3816        | 60 ± 12    | 79 ± 12    | 76 ± 10    | 98 ± 26     |
| 214004_s_at | SNRK   | SNF-1 related kinase                                     | <b>0.0161</b>    | <b>-0.0380</b>    | 0.2111           | 0.3382            | 0.0750        | 447 ± 33   | 530 ± 101  | 721 ± 103  | 740 ± 104   |
| 201221_s_at | SNRP70 | small nuclear ribonucleoprotein 70kDa polypeptide        | <b>0.0151</b>    | -0.0709           | 0.3048           | 0.3104            | 0.0651        | 2083 ± 140 | 2283 ± 358 | 2252 ± 288 | 3607 ± 741  |
| 203516_at   | SNTA1  | syntrophin, alpha 1                                      | <b>0.0048</b>    | -0.0674           | 0.1956           | 0.3795            | <b>0.0179</b> | 1068 ± 93  | 1166 ± 167 | 1772 ± 126 | 1439 ± 259  |
| 53912_at    | SNX11  | sorting nexin 11                                         | <b>0.0078</b>    | -0.0588           | 0.3747           | 0.1381            | 0.0916        | 659 ± 48   | 690 ± 68   | 775 ± 79   | 1139 ± 273  |
| 220140_s_at | SNX11  | sorting nexin 11                                         | <b>0.0211</b>    | <b>-0.0482</b>    | <b>0.0089</b>    | -0.2493           | <b>0.0174</b> | 436 ± 36   | 594 ± 52   | 537 ± 52   | 646 ± 34    |
| 219793_at   | SNX16  | sorting nexin 16                                         | <b>0.0177</b>    | -0.0954           | 0.3075           | <b>-0.0032</b>    | 0.3081        | 72 ± 8     | 89 ± 14    | 101 ± 8    | 97 ± 16     |
| 217789_at   | SNX6   | sorting nexin 6                                          | <b>0.0032</b>    | -0.0871           | 0.2358           | -0.3492           | 0.2253        | 578 ± 53   | 770 ± 117  | 861 ± 96   | 963 ± 226   |
| 215078_at   | SOD2   | superoxide dismutase 2, mitochondrial                    | 0.2895           | <b>-0.0120</b>    | -0.4533          | 0.1783            | 0.1261        | 32 ± 7     | 43 ± 6     | 52 ± 10    | 68 ± 16     |
| 204275_at   | SOLH   | small optic lobes homolog                                | <b>0.0498</b>    | -0.2702           | 0.2357           | -0.2695           | 0.2524        | 247 ± 20   | 232 ± 11   | 309 ± 18   | 276 ± 44    |
| 218087_s_at | SORBS1 | sorbin and SH3 domain containing 1                       | <b>0.0146</b>    | <b>-0.0500</b>    | 0.1965           | -0.0631           | <b>0.0032</b> | 3538 ± 296 | 3953 ± 332 | 6032 ± 568 | 4431 ± 613  |
| 201563_at   | SORD   | sorbitol dehydrogenase                                   | <b>0.0355</b>    | <b>-0.0005</b>    | 0.4184           | -0.1133           | <b>0.0256</b> | 384 ± 37   | 435 ± 44   | 519 ± 52   | 575 ± 48    |
| 204432_at   | SOX12  | SRY -box 12                                              | <b>0.0323</b>    | -0.1077           | -0.4298          | -0.2083           | 0.3770        | 179 ± 20   | 195 ± 23   | 249 ± 36   | 241 ± 51    |
| 38918_at    | SOX13  | SRY -box 13                                              | 0.0671           | <b>-0.0135</b>    | 0.4324           | -0.2430           | <b>0.0320</b> | 224 ± 23   | 245 ± 13   | 309 ± 10   | 283 ± 27    |
| 213721_at   | SOX2   | SRY -box 2                                               | <b>0.0051</b>    | -0.0886           | 0.2700           | -0.3085           | 0.2874        | 911 ± 63   | 1027 ± 120 | 1106 ± 93  | 1159 ± 107  |
| 202935_s_at | SOX9   | SRY -box 9                                               | 0.2072           | <b>-0.0413</b>    | 0.4124           | -0.1193           | 0.3201        | 1868 ± 242 | 1947 ± 226 | 2225 ± 200 | 2432 ± 256  |
| 202863_at   | SP100  | nuclear antigen Sp100                                    | 0.4149           | <b>-0.0013</b>    | -0.3967          | -0.3193           | <b>0.0095</b> | 201 ± 17   | 207 ± 12   | 204 ± 22   | 306 ± 37    |
| 209761_s_at | SP110  | SP110 nuclear body protein                               | <b>0.0074</b>    | <b>-0.0083</b>    | 0.3462           | -0.2521           | 0.0630        | 291 ± 33   | 323 ± 20   | 381 ± 33   | 442 ± 66    |
| 213168_at   | SP3    | Sp3 transcription factor                                 | 0.4829           | <b>-0.0194</b>    | -0.3456          | <b>-0.0029</b>    | 0.1453        | 1062 ± 49  | 1073 ± 103 | 1305 ± 74  | 1185 ± 103  |
| 210117_at   | SPAG1  | sperm associated antigen 1                               | <b>0.0113</b>    | <b>0.0000</b>     | <b>0.0028</b>    | -0.0951           | <b>0.0005</b> | 108 ± 9    | 143 ± 21   | 142 ± 13   | 215 ± 18    |
| 210033_s_at | SPAG6  | sperm associated antigen 6                               | 0.2245           | <b>-0.0057</b>    | -0.1899          | 0.4068            | <b>0.0009</b> | 140 ± 15   | 134 ± 5    | 124 ± 26   | 248 ± 21    |
| 212468_at   | SPAG9  | sperm associated antigen 9                               | 0.3476           | <b>-0.0233</b>    | 0.0609           | -0.0580           | 0.1248        | 297 ± 30   | 387 ± 38   | 405 ± 32   | 422 ± 59    |
| 200665_s_at | SPARC  | secreted protein, acidic, cysteine-rich                  | 0.0672           | <b>-0.0003</b>    | -0.1639          | -0.1010           | <b>0.0226</b> | 2913 ± 418 | 2930 ± 596 | 3905 ± 516 | 5716 ± 1081 |
| 201290_at   | SPC18  | signal peptidase complex                                 | <b>0.0088</b>    | <b>-0.0240</b>    | 0.2285           | -0.1576           | 0.0671        | 1337 ± 91  | 1513 ± 121 | 1742 ± 101 | 1654 ± 144  |
| 219257_s_at | SPHK1  | sphingosine kinase 1                                     | 0.1330           | <b>-0.0402</b>    | 0.2499           | -0.2398           | 0.1792        | 211 ± 31   | 277 ± 24   | 271 ± 29   | 302 ± 31    |
| 205861_at   | SPIB   | Spi-B transcription factor                               | <b>0.0352</b>    | <b>-0.0016</b>    | -0.4522          | <b>-0.0102</b>    | <b>0.0071</b> | 145 ± 14   | 150 ± 23   | 153 ± 16   | 241 ± 29    |
| 204640_s_at | SPOP   | speckle-type POZ protein                                 | <b>0.0130</b>    | <b>-0.0508</b>    | 0.3502           | -0.2411           | <b>0.0513</b> | 1577 ± 128 | 1574 ± 47  | 1983 ± 71  | 1808 ± 165  |
| 208939_at   | SPS    | selenium donor protein                                   | <b>0.0075</b>    | <b>0.0000</b>     | -0.3770          | -0.1017           | <b>0.0019</b> | 613 ± 30   | 654 ± 55   | 762 ± 39   | 930 ± 91    |
| 203127_s_at | SPTLC2 | serine palmitoyltransferase, long chain base subunit 2   | 0.3684           | <b>-0.0010</b>    | -0.0919          | -0.3287           | <b>0.0036</b> | 448 ± 40   | 418 ± 46   | 407 ± 30   | 670 ± 76    |
| 214072_x_at | SPUF   | secreted protein of unknown function                     | 0.5587           | <b>-0.0258</b>    | <b>0.0221</b>    | <b>-0.0119</b>    | 0.0605        | 260 ± 12   | 331 ± 28   | 294 ± 19   | 340 ± 27    |
| 38766_at    | SRCAP  | Snf2-related CBP activator protein                       | <b>0.0051</b>    | <b>-0.0128</b>    | 0.3534           | -0.4363           | <b>0.0079</b> | 262 ± 30   | 364 ± 39   | 396 ± 17   | 446 ± 48    |
| 202308_at   | SREBF1 | sterol regulatory element binding transcription factor 1 | <b>0.0157</b>    | <b>-0.0249</b>    | <b>0.0002</b>    | -0.1787           | <b>0.0319</b> | 526 ± 42   | 967 ± 130  | 858 ± 105  | 1196 ± 268  |
| 201248_s_at | SREBF2 | sterol regulatory element binding transcription factor 2 | <b>0.0109</b>    | <b>-0.0222</b>    | 0.3194           | -0.3374           | 0.0764        | 514 ± 47   | 482 ± 23   | 647 ± 56   | 717 ± 112   |
| 203181_x_at | SRPK2  | SFRS protein kinase 2                                    | <b>0.0024</b>    | <b>-0.0078</b>    | 0.2557           | <b>-0.0211</b>    | <b>0.0249</b> | 653 ± 49   | 780 ± 42   | 898 ± 72   | 902 ± 75    |
| 204955_at   | SRPX   | sushi-repeat-containing protein, X chromosome            | <b>0.0329</b>    | <b>-0.0001</b>    | 0.3611           | -0.1210           | <b>0.0201</b> | 555 ± 67   | 603 ± 91   | 759 ± 104  | 1030 ± 163  |
| 207435_s_at | SRRM2  | serine/arginine repetitive matrix 2                      | <b>0.0455</b>    | -0.0891           | -0.1306          | -0.3703           | 0.3390        | 1711 ± 263 | 1665 ± 142 | 2272 ± 275 | 2247 ± 471  |
| 208610_s_at | SRRM2  | serine/arginine repetitive matrix 2                      | 0.1392           | <b>-0.0188</b>    | 0.1935           | -0.1035           | 0.1846        | 922 ± 118  | 1020 ± 111 | 1178 ± 148 | 1420 ± 249  |
| 219405_at   | SS-56  | SSA protein SS-56                                        | 0.3120           | <b>-0.0185</b>    | -0.1404          | -0.1418           | 0.2804        | 340 ± 33   | 345 ± 25   | 374 ± 17   | 411 ± 29    |
| 207520_at   | SSA2   | Sjogren syndrome antigen A2                              | 0.3551           | <b>-0.0294</b>    | -0.4371          | -0.0970           | 0.0787        | 59 ± 8     | 61 ± 8     | 61 ± 7     | 98 ± 20     |
| 212852_s_at | SSA2   | Sjogren syndrome antigen A2                              | <b>0.0009</b>    | <b>-0.0134</b>    | 0.1610           | -0.4100           | 0.0711        | 1973 ± 193 | 2150 ± 259 | 2577 ± 179 | 2909 ± 392  |
| 46256_at    | SSB-3  | SPRY domain-containing SOCS box protein SSB-3            | <b>0.0081</b>    | <b>-0.0069</b>    | 0.4760           | 0.1705            | <b>0.0072</b> | 1667 ± 47  | 1832 ± 250 | 1808 ± 44  | 2744 ± 389  |
| 214060_at   | SSBP1  | single-stranded DNA binding protein                      | 0.2778           | <b>-0.0208</b>    | -0.4106          | 0.2700            | <b>0.0284</b> | 255 ± 26   | 275 ± 21   | 242 ± 20   | 372 ± 50    |



| Probe set   | Name      | Description                                                     | NFT <sub>0</sub> | MMSE <sub>0</sub> | NFT <sub>1</sub> | MMSE <sub>1</sub> | ANOVA         | Control    | Incipient  | Moderate   | Severe     |
|-------------|-----------|-----------------------------------------------------------------|------------------|-------------------|------------------|-------------------|---------------|------------|------------|------------|------------|
| 202506_at   | SSFA2     | sperm specific antigen 2                                        | <b>0.0486</b>    | <b>-0.0010</b>    | 0.4770           | <b>-0.0126</b>    | <b>0.0542</b> | 893 ± 105  | 1059 ± 103 | 1376 ± 188 | 1419 ± 174 |
| 221753_at   | SSH1      | slingshot 1                                                     | 0.0640           | <b>-0.0177</b>    | 0.1460           | <b>-0.0289</b>    | 0.0711        | 355 ± 25   | 388 ± 18   | 427 ± 31   | 479 ± 50   |
| 51192_at    | SSH-3     | slingshot 3                                                     | <b>0.0014</b>    | <b>-0.0009</b>    | <b>0.0268</b>    | -0.3388           | <b>0.0044</b> | 291 ± 21   | 370 ± 27   | 393 ± 23   | 619 ± 115  |
| 214105_at   | SSI-3     | suppressor of cytokine signaling 3                              | <b>0.0025</b>    | <b>-0.0095</b>    | 0.4300           | 0.2982            | <b>0.0089</b> | 40 ± 5     | 42 ± 8     | 89 ± 7     | 107 ± 29   |
| 204964_s_at | SSPN      | sarcospan                                                       | 0.1982           | <b>-0.0037</b>    | 0.3021           | <b>-0.0074</b>    | <b>0.0230</b> | 285 ± 39   | 362 ± 66   | 426 ± 51   | 576 ± 98   |
| 204963_at   | SSPN      | sarcospan                                                       | 0.2502           | <b>-0.0128</b>    | 0.3774           | -0.4936           | <b>0.0367</b> | 305 ± 31   | 318 ± 34   | 314 ± 33   | 481 ± 75   |
| 200652_at   | SSR2      | signal sequence receptor, beta                                  | <b>0.0403</b>    | -0.0640           | <b>0.0499</b>    | -0.2850           | 0.0660        | 1023 ± 47  | 1151 ± 63  | 1115 ± 26  | 1269 ± 101 |
| 202440_s_at | ST5       | suppression of tumorigenicity 5                                 | <b>0.0393</b>    | <b>-0.0180</b>    | 0.2207           | 0.4519            | 0.0906        | 379 ± 36   | 336 ± 40   | 464 ± 35   | 472 ± 46   |
| 202294_at   | STAG1     | stromal antigen 1                                               | 0.0723           | <b>-0.0294</b>    | -0.1990          | 0.4287            | <b>0.0288</b> | 565 ± 30   | 568 ± 73   | 588 ± 27   | 791 ± 86   |
| 209022_at   | STAG2     | stromal antigen 2                                               | 0.3647           | <b>-0.0303</b>    | -0.2631          | -0.1119           | 0.3818        | 2095 ± 162 | 2163 ± 221 | 2488 ± 182 | 2456 ± 237 |
| 209023_s_at | STAG2     | stromal antigen 2                                               | <b>0.0027</b>    | <b>-0.0085</b>    | 0.3459           | <b>-0.0066</b>    | <b>0.0240</b> | 506 ± 61   | 644 ± 21   | 837 ± 75   | 757 ± 122  |
| 202991_at   | STARD3    | START domain containing 3                                       | <b>0.0225</b>    | -0.1621           | -0.3479          | 0.3569            | 0.4592        | 195 ± 15   | 194 ± 21   | 241 ± 33   | 241 ± 36   |
| 201331_s_at | STAT6     | signal transducer and activator of transcription 6, IL4 induced | <b>0.0223</b>    | <b>-0.0179</b>    | 0.4762           | -0.3917           | 0.1537        | 618 ± 51   | 569 ± 29   | 640 ± 43   | 766 ± 88   |
| 213037_x_at | STAU      | staufen, RNA binding protein                                    | 0.1214           | <b>-0.0495</b>    | <b>-0.0476</b>   | -0.1455           | 0.0939        | 3023 ± 133 | 2850 ± 66  | 3353 ± 116 | 3251 ± 204 |
| 202764_at   | STIM1     | stromal interaction molecule 1                                  | <b>0.0215</b>    | <b>-0.0026</b>    | 0.0697           | -0.1609           | 0.0654        | 253 ± 28   | 255 ± 23   | 324 ± 17   | 338 ± 33   |
| 40420_at    | STK10     | serine/threonine kinase 10                                      | 0.1280           | <b>-0.0092</b>    | 0.1361           | -0.1559           | 0.0553        | 223 ± 20   | 253 ± 28   | 240 ± 13   | 310 ± 26   |
| 41657_at    | STK11     | serine/threonine kinase 11                                      | 0.0944           | <b>-0.0050</b>    | 0.1801           | 0.0657            | <b>0.0056</b> | 806 ± 99   | 738 ± 104  | 891 ± 35   | 1421 ± 215 |
| 212565_at   | STK38L    | serine/threonine kinase 38 like                                 | 0.2831           | <b>-0.0388</b>    | -0.2267          | -0.3637           | 0.1654        | 494 ± 37   | 429 ± 52   | 515 ± 9    | 582 ± 66   |
| 203330_s_at | STX5A     | syntaxin 5A                                                     | 0.3823           | <b>-0.0434</b>    | 0.1426           | -0.0747           | 0.1213        | 190 ± 17   | 229 ± 15   | 210 ± 20   | 247 ± 7    |
| 215588_x_at | SUDD      | sudD suppressor of bimD6 homolog                                | <b>0.0036</b>    | <b>-0.0364</b>    | 0.1982           | -0.1362           | 0.1386        | 1815 ± 216 | 1913 ± 136 | 2669 ± 330 | 3159 ± 836 |
| 206593_s_at | SURF5     | surfeit 5                                                       | 0.4824           | <b>-0.0229</b>    | 0.0728           | -0.1322           | 0.3090        | 393 ± 26   | 398 ± 37   | 439 ± 21   | 468 ± 36   |
| 219262_at   | SUV39H2   | suppressor of variegation 3-9 homolog 2                         | 0.6039           | <b>-0.0475</b>    | 0.2314           | -0.4013           | 0.0841        | 39 ± 5     | 39 ± 10    | 41 ± 10    | 74 ± 17    |
| 204978_at   | SWAP2     | suppressor of white apricot homolog 2                           | <b>0.0017</b>    | <b>-0.0242</b>    | 0.2863           | -0.4042           | <b>0.0522</b> | 949 ± 115  | 1131 ± 161 | 1135 ± 118 | 1803 ± 405 |
| 206546_at   | SYCP2     | synaptonemal complex protein 2                                  | <b>0.0032</b>    | -0.0905           | <b>0.0001</b>    | -0.0670           | 0.2322        | 32 ± 3     | 45 ± 7     | 53 ± 7     | 55 ± 15    |
| 221276_s_at | SYNCOILIN | intermediate filament protein syncoilin                         | <b>0.0021</b>    | <b>-0.0021</b>    | 0.3414           | <b>-0.0113</b>    | <b>0.0160</b> | 119 ± 12   | 126 ± 22   | 165 ± 21   | 198 ± 18   |
| 221898_at   | T1A-2     | lung type-I cell membrane-associated glycoprotein               | 0.4797           | <b>-0.0091</b>    | -0.2149          | -0.3009           | 0.1723        | 174 ± 32   | 143 ± 16   | 209 ± 17   | 232 ± 38   |
| 217437_s_at | TACC1     | transforming, acidic coiled-coil containing protein 1           | 0.2180           | <b>-0.0049</b>    | <b>0.0210</b>    | -0.2360           | 0.1797        | 458 ± 23   | 501 ± 27   | 555 ± 54   | 612 ± 79   |
| 215272_at   | TADA3L    | transcriptional adaptor 3-like                                  | <b>0.0400</b>    | -0.1427           | 0.4103           | -0.4306           | 0.3476        | 79 ± 12    | 73 ± 18    | 82 ± 12    | 124 ± 38   |
| 209358_at   | TAF11     | TAF11 RNA polymerase II                                         | 0.0573           | <b>-0.0315</b>    | 0.1939           | -0.4966           | 0.0756        | 458 ± 39   | 485 ± 40   | 479 ± 38   | 613 ± 55   |
| 202840_at   | TAF15     | TAF15 RNA polymerase II                                         | <b>0.0532</b>    | <b>-0.0073</b>    | 0.0564           | -0.0856           | <b>0.0382</b> | 351 ± 34   | 350 ± 32   | 504 ± 33   | 489 ± 77   |
| 210053_at   | TAF5      | TAF5 RNA polymerase II                                          | 0.0976           | <b>-0.0345</b>    | -0.2634          | -0.2789           | 0.1180        | 321 ± 25   | 306 ± 36   | 398 ± 26   | 376 ± 34   |
| 205547_s_at | TAGLN     | transgelin                                                      | <b>0.0000</b>    | <b>-0.0120</b>    | 0.1651           | -0.2519           | <b>0.0289</b> | 225 ± 31   | 239 ± 37   | 341 ± 22   | 362 ± 54   |
| 204877_s_at | TAO1      | thousand and one amino acid protein kinase                      | 0.6842           | <b>-0.0399</b>    | <b>0.0067</b>    | 0.3208            | <b>0.0183</b> | 114 ± 10   | 122 ± 9    | 97 ± 7     | 180 ± 33   |
| 202307_s_at | TAP1      | transporter 1, ATP-binding cassette, sub-family B               | 0.7251           | <b>-0.0383</b>    | 0.1327           | -0.3236           | 0.1894        | 385 ± 48   | 418 ± 76   | 338 ± 42   | 653 ± 200  |
| 208829_at   | TAPBP     | TAP binding protein                                             | <b>0.0159</b>    | -0.1026           | 0.4846           | -0.1862           | 0.0695        | 1245 ± 102 | 1233 ± 54  | 1582 ± 115 | 1433 ± 109 |
| 221444_at   | TAS2R16   | taste receptor, type 2, member 16                               | 0.3909           | <b>-0.0196</b>    | 0.1102           | -0.2086           | 0.0559        | 146 ± 14   | 162 ± 15   | 152 ± 15   | 210 ± 23   |
| 206916_x_at | TAT       | tyrosine aminotransferase                                       | 0.2259           | <b>-0.0134</b>    | -0.2050          | -0.3071           | <b>0.0128</b> | 59 ± 11    | 52 ± 5     | 55 ± 9     | 105 ± 16   |
| 202132_at   | TAZ       | transcriptional co-activator with PDZ-binding motif             | <b>0.0064</b>    | -0.1504           | 0.1412           | 0.1375            | <b>0.0358</b> | 110 ± 13   | 90 ± 8     | 183 ± 31   | 148 ± 25   |
| 37278_at    | TAZ       | tafazzin ; endocardial fibroelastosis 2; Barth syndrome)        | 0.1651           | <b>-0.0262</b>    | 0.1214           | -0.1555           | 0.0706        | 539 ± 38   | 648 ± 69   | 592 ± 35   | 745 ± 61   |
| 202133_at   | TAZ       | transcriptional co-activator with PDZ-binding motif             | 0.0666           | <b>-0.0279</b>    | 0.1714           | <b>-0.0424</b>    | <b>0.0029</b> | 475 ± 84   | 634 ± 95   | 1340 ± 265 | 912 ± 106  |
| 222173_s_at | TBC1D2    | TBC1 domain family, member 2                                    | 0.0991           | <b>-0.0399</b>    | -0.2686          | -0.3220           | <b>0.0371</b> | 88 ± 18    | 66 ± 22    | 55 ± 11    | 160 ± 45   |
| 201813_s_at | TBC1D5    | TBC1 domain family, member 5                                    | <b>0.0284</b>    | <b>-0.0129</b>    | <b>0.0340</b>    | <b>-0.0342</b>    | <b>0.0431</b> | 776 ± 19   | 890 ± 46   | 925 ± 74   | 1062 ± 103 |

| Probe set   | Name      | Description                                              | NFT <sub>0</sub> | MMSE <sub>0</sub> | NFT <sub>1</sub> | MMSE <sub>1</sub> | ANOVA         | Control    | Incipient  | Moderate    | Severe      |
|-------------|-----------|----------------------------------------------------------|------------------|-------------------|------------------|-------------------|---------------|------------|------------|-------------|-------------|
| 213400_s_at | TBL1X     | transducin-like 1X-linked                                | <b>0.0024</b>    | <b>-0.0002</b>    | 0.2245           | 0.3880            | <b>0.0007</b> | 853 ± 75   | 949 ± 126  | 1106 ± 68   | 1624 ± 196  |
| 215122_at   | TBX6      | T-box 6                                                  | 0.0593           | <b>-0.0294</b>    | -0.2407          | <b>-0.0532</b>    | 0.0981        | 33 ± 9     | 42 ± 9     | 74 ± 18     | 78 ± 22     |
| 207554_x_at | TBXA2R    | thromboxane A2 receptor                                  | 0.3649           | <b>-0.0094</b>    | <b>0.0037</b>    | -0.1471           | <b>0.0080</b> | 171 ± 19   | 203 ± 20   | 171 ± 21    | 284 ± 35    |
| 214449_s_at | TC10      | ras-like protein TC10                                    | 0.4970           | <b>-0.0215</b>    | -0.1950          | 0.3304            | 0.2737        | 228 ± 29   | 223 ± 27   | 269 ± 37    | 301 ± 26    |
| 212122_at   | TC10      | ras-like protein TC10                                    | <b>0.0055</b>    | <b>-0.0006</b>    | 0.0599           | <b>-0.0001</b>    | <b>0.0012</b> | 154 ± 17   | 247 ± 26   | 292 ± 20    | 280 ± 36    |
| 212119_at   | TC10      | ras-like protein TC10                                    | <b>0.0311</b>    | <b>-0.0112</b>    | -0.3316          | <b>-0.0225</b>    | <b>0.0356</b> | 1844 ± 156 | 2098 ± 183 | 2545 ± 208  | 2401 ± 161  |
| 212931_at   | TCF20     | transcription factor 20                                  | <b>0.0210</b>    | -0.4521           | -0.4258          | 0.1709            | 0.2903        | 870 ± 25   | 848 ± 79   | 1067 ± 63   | 979 ± 158   |
| 209153_s_at | TCF3      | transcription factor 3                                   | <b>0.0003</b>    | <b>-0.0005</b>    | 0.1557           | <b>-0.0216</b>    | <b>0.0069</b> | 224 ± 32   | 293 ± 34   | 438 ± 66    | 468 ± 72    |
| 221016_s_at | TCF-3     | HMG-box transcription factor TCF-3                       | <b>0.0004</b>    | <b>-0.0048</b>    | 0.1881           | -0.1469           | <b>0.0108</b> | 355 ± 24   | 444 ± 45   | 455 ± 37    | 563 ± 51    |
| 205255_x_at | TCF7      | transcription factor 7                                   | <b>0.0052</b>    | <b>-0.0263</b>    | 0.1623           | -0.4557           | <b>0.0352</b> | 804 ± 96   | 1143 ± 180 | 970 ± 104   | 1628 ± 325  |
| 212761_at   | TCF7L2    | transcription factor 7-like 2                            | <b>0.0147</b>    | <b>-0.0006</b>    | 0.1012           | -0.3033           | <b>0.0261</b> | 1861 ± 116 | 2134 ± 213 | 2302 ± 127  | 2883 ± 396  |
| 212762_s_at | TCF7L2    | transcription factor 7-like 2                            | <b>0.0078</b>    | <b>-0.0274</b>    | 0.2111           | -0.0889           | 0.1190        | 422 ± 47   | 448 ± 27   | 590 ± 69    | 572 ± 75    |
| 204043_at   | TCN2      | transcobalamin II; macrocytic anemia                     | 0.4467           | <b>-0.0281</b>    | <b>0.0083</b>    | <b>-0.0053</b>    | 0.0877        | 239 ± 16   | 320 ± 30   | 293 ± 32    | 345 ± 41    |
| 202384_s_at | TCOF1     | Treacher Collins-Franceschetti syndrome 1                | <b>0.0040</b>    | -0.1318           | 0.4932           | <b>-0.0009</b>    | 0.0595        | 150 ± 14   | 177 ± 18   | 268 ± 38    | 209 ± 44    |
| 201999_s_at | TCTEL1    | t-complex-associated-testis-expressed 1-like 1           | <b>0.0401</b>    | <b>-0.0003</b>    | -0.1117          | -0.1475           | <b>0.0192</b> | 1062 ± 71  | 1086 ± 66  | 1309 ± 108  | 1498 ± 154  |
| 203742_s_at | TDG       | thymine-DNA glycosylase                                  | <b>0.0043</b>    | <b>-0.0134</b>    | <b>-0.0461</b>   | -0.3433           | <b>0.0227</b> | 181 ± 19   | 158 ± 6    | 194 ± 14    | 287 ± 55    |
| 201737_s_at | TEB4      | similar to S. cerevisiae SSM4                            | <b>0.0373</b>    | <b>-0.0279</b>    | 0.2946           | <b>-0.0212</b>    | 0.0551        | 1927 ± 111 | 2131 ± 127 | 2717 ± 277  | 2452 ± 245  |
| 200804_at   | TEGT      | testis enhanced gene transcript                          | 0.0924           | <b>-0.0081</b>    | 0.2297           | -0.0781           | <b>0.0132</b> | 5273 ± 269 | 5521 ± 350 | 6661 ± 244  | 6016 ± 364  |
| 221680_s_at | TEL2      | transcription factor ets                                 | <b>0.0211</b>    | <b>-0.0004</b>    | 0.1299           | -0.1338           | <b>0.0126</b> | 145 ± 12   | 176 ± 10   | 211 ± 21    | 240 ± 29    |
| 219025_at   | TEM1      | tumor endothelial marker 1 precursor                     | <b>0.0036</b>    | <b>-0.0122</b>    | -0.4062          | -0.1802           | 0.0713        | 280 ± 24   | 301 ± 7    | 352 ± 47    | 451 ± 77    |
| 217853_at   | TEM6      | tumor endothelial marker 6                               | 0.1228           | <b>-0.0027</b>    | <b>0.0146</b>    | -0.2218           | <b>0.0210</b> | 2462 ± 159 | 2999 ± 448 | 4169 ± 468  | 4407 ± 725  |
| 220147_s_at | TERA      | TERA protein                                             | 0.1892           | <b>-0.0370</b>    | -0.1013          | -0.2693           | 0.2641        | 428 ± 43   | 460 ± 21   | 458 ± 30    | 530 ± 40    |
| 202720_at   | TES       | testis derived transcript                                | 0.4626           | <b>-0.0111</b>    | 0.4356           | -0.1491           | 0.0955        | 215 ± 34   | 199 ± 43   | 225 ± 27    | 321 ± 33    |
| 218020_s_at | TEX27     | testis expressed sequence 27                             | 0.3407           | <b>-0.0397</b>    | -0.4504          | 0.3833            | 0.1559        | 1007 ± 52  | 1111 ± 69  | 1120 ± 57   | 1210 ± 71   |
| 214063_s_at | TF        | transferrin                                              | 0.1738           | <b>-0.0017</b>    | 0.4695           | -0.0883           | <b>0.0396</b> | 6535 ± 841 | 6388 ± 707 | 3136 ± 1103 | 1139 ± 1856 |
| 204653_at   | TFAP2A    | transcription factor AP-2 alpha                          | 0.3762           | <b>-0.0453</b>    | -0.1267          | 0.3997            | <b>0.0021</b> | 125 ± 20   | 109 ± 17   | 85 ± 17     | 218 ± 34    |
| 212457_at   | TFE3      | transcription factor binding to IGHM enhancer 3          | <b>0.0362</b>    | -0.1708           | -0.0995          | -0.2453           | <b>0.0150</b> | 1132 ± 81  | 937 ± 92   | 1393 ± 111  | 1134 ± 58   |
| 50221_at    | TFEB      | transcription factor EB                                  | 0.0654           | <b>-0.0085</b>    | 0.1780           | -0.4414           | 0.1582        | 677 ± 82   | 790 ± 133  | 891 ± 123   | 1170 ± 249  |
| 221866_at   | TFEB      | transcription factor EB                                  | 0.0694           | <b>-0.0315</b>    | 0.3967           | -0.2969           | 0.2704        | 197 ± 34   | 230 ± 29   | 296 ± 48    | 297 ± 57    |
| 206715_at   | TFEC      | transcription factor EC                                  | 0.0706           | <b>-0.0235</b>    | -0.4850          | -0.0634           | <b>0.0440</b> | 72 ± 13    | 87 ± 13    | 78 ± 10     | 123 ± 13    |
| 203085_s_at | TGFB1     | transforming growth factor, beta 1                       | 0.3127           | <b>-0.0033</b>    | 0.2759           | 0.4450            | <b>0.0134</b> | 402 ± 33   | 364 ± 16   | 406 ± 47    | 644 ± 107   |
| 209651_at   | TGFB111   | transforming growth factor beta 1 induced transcript 1   | 0.0569           | <b>-0.0001</b>    | 0.1423           | -0.3400           | <b>0.0016</b> | 258 ± 29   | 257 ± 32   | 351 ± 30    | 515 ± 76    |
| 209908_s_at | TGFB2     | transforming growth factor, beta 2                       | <b>0.0337</b>    | -0.0575           | 0.2625           | -0.4716           | 0.1398        | 123 ± 25   | 171 ± 38   | 174 ± 7     | 234 ± 50    |
| 209909_s_at | TGFB2     | transforming growth factor, beta 2                       | <b>0.0458</b>    | <b>-0.0137</b>    | -0.2768          | -0.0691           | <b>0.0277</b> | 57 ± 6     | 52 ± 10    | 66 ± 9      | 95 ± 15     |
| 204731_at   | TGFB3     | transforming growth factor, beta receptor III            | <b>0.0048</b>    | <b>-0.0001</b>    | 0.3427           | <b>-0.0168</b>    | <b>0.0091</b> | 339 ± 33   | 413 ± 40   | 512 ± 66    | 630 ± 87    |
| 203313_s_at | TGIF      | TGFB-induced factor                                      | 0.1384           | <b>-0.0075</b>    | <b>-0.0130</b>   | 0.1977            | 0.0637        | 204 ± 31   | 160 ± 11   | 275 ± 22    | 298 ± 62    |
| 216262_s_at | TGIF2     | TGFB-induced factor 2                                    | 0.3764           | <b>-0.0102</b>    | 0.2323           | -0.0885           | <b>0.0367</b> | 200 ± 24   | 229 ± 22   | 197 ± 14    | 295 ± 36    |
| 212596_s_at | THC211630 | partial transcript encompassing THC211630 gene           | <b>0.0016</b>    | -0.1049           | 0.2030           | 0.3692            | 0.2414        | 575 ± 47   | 640 ± 100  | 767 ± 109   | 951 ± 247   |
| 208104_s_at | THG-1     | TSC-22-like                                              | <b>0.0367</b>    | <b>-0.0213</b>    | <b>0.0196</b>    | <b>-0.0480</b>    | <b>0.0386</b> | 730 ± 59   | 968 ± 139  | 1231 ± 136  | 1097 ± 142  |
| 222122_s_at | THO2      | Tho2                                                     | <b>0.0404</b>    | -0.0989           | -0.4113          | <b>-0.0364</b>    | 0.2425        | 398 ± 39   | 377 ± 36   | 369 ± 29    | 470 ± 38    |
| 1316_at     | THRA      | thyroid hormone receptor, alpha oncogene homolog, avian) | 0.0787           | <b>-0.0041</b>    | 0.1177           | -0.1348           | <b>0.0089</b> | 161 ± 10   | 200 ± 19   | 204 ± 18    | 278 ± 36    |
| 202039_at   | TIAF1     | TGFB1-induced anti-apoptotic factor 1                    | <b>0.0012</b>    | -0.0569           | 0.1168           | -0.3206           | 0.1704        | 1417 ± 134 | 1796 ± 259 | 2099 ± 192  | 2348 ± 562  |

| Probe set   | Name      | Description                                              | NFT <sub>O</sub> | MMSE <sub>O</sub> | NFT <sub>I</sub> | MMSE <sub>I</sub> | ANOVA         | Control    | Incipient  | Moderate   | Severe     |
|-------------|-----------|----------------------------------------------------------|------------------|-------------------|------------------|-------------------|---------------|------------|------------|------------|------------|
| 203317_at   | TIC       | SEC7 homolog                                             | <b>0.0203</b>    | <b>-0.0014</b>    | <b>0.0514</b>    | 0.3490            | <b>0.0044</b> | 78 ± 17    | 94 ± 10    | 173 ± 19   | 172 ± 33   |
| 213301_x_at | TIF1      | transcriptional intermediary factor 1                    | <b>0.0015</b>    | <b>-0.0051</b>    | 0.0706           | -0.0954           | <b>0.0450</b> | 357 ± 21   | 407 ± 15   | 464 ± 39   | 501 ± 59   |
| 204391_x_at | TIF1      | transcriptional intermediary factor 1                    | <b>0.0019</b>    | <b>-0.0483</b>    | <b>-0.0013</b>   | 0.0578            | 0.1005        | 485 ± 13   | 469 ± 49   | 558 ± 39   | 611 ± 62   |
| 203046_s_at | TIMELESS  | timeless homolog                                         | <b>0.0374</b>    | -0.0640           | -0.3186          | -0.0681           | 0.1319        | 172 ± 20   | 240 ± 38   | 208 ± 16   | 284 ± 55   |
| 215168_at   | TIMM17A   | translocase of inner mitochondrial membrane 17 homolog A | <b>0.0198</b>    | -0.0772           | -0.4583          | -0.2471           | 0.1773        | 31 ± 10    | 26 ± 6     | 32 ± 4     | 61 ± 20    |
| 203092_at   | TIMM44    | translocase of inner mitochondrial membrane 44 homolog   | <b>0.0045</b>    | -0.3013           | -0.2335          | 0.1153            | 0.4589        | 367 ± 28   | 305 ± 36   | 369 ± 38   | 471 ± 139  |
| 203093_s_at | TIMM44    | translocase of inner mitochondrial membrane 44 homolog   | <b>0.0215</b>    | <b>-0.0010</b>    | 0.2759           | <b>0.0405</b>     | <b>0.0199</b> | 221 ± 8    | 232 ± 26   | 276 ± 18   | 356 ± 56   |
| 209154_at   | TIP-1     | Tax interaction protein 1                                | <b>0.0516</b>    | <b>-0.0025</b>    | <b>0.0013</b>    | -0.0847           | <b>0.0353</b> | 1652 ± 192 | 2510 ± 446 | 2896 ± 347 | 3486 ± 649 |
| 202122_s_at | TIP47     | cargo selection protein                                  | 0.0586           | <b>-0.0315</b>    | 0.3834           | -0.4372           | 0.2473        | 685 ± 82   | 743 ± 105  | 825 ± 87   | 953 ± 110  |
| 217367_s_at | TIX1      | triple homeobox 1                                        | <b>0.0000</b>    | <b>0.0000</b>     | <b>0.0370</b>    | <b>-0.0144</b>    | <b>0.0001</b> | 511 ± 47   | 593 ± 47   | 761 ± 57   | 913 ± 74   |
| 202085_at   | TJP2      | tight junction protein 2                                 | <b>0.0172</b>    | <b>-0.0007</b>    | -0.4256          | -0.0691           | 0.0605        | 1428 ± 145 | 1570 ± 296 | 1904 ± 182 | 2266 ± 271 |
| 47608_at    | TJP4      | tight junction protein 4                                 | <b>0.0064</b>    | -0.0907           | 0.1283           | -0.1933           | 0.2218        | 1175 ± 140 | 1563 ± 222 | 1462 ± 164 | 1948 ± 458 |
| 206472_s_at | TLE3      | transducin-like enhancer of split 3 homolog, Drosophila) | <b>0.0026</b>    | -0.1135           | -0.4060          | 0.2597            | 0.0932        | 87 ± 11    | 98 ± 20    | 84 ± 16    | 151 ± 30   |
| 212769_at   | TLE3      | transducin-like enhancer of split 3 homolog, Drosophila) | <b>0.0083</b>    | <b>-0.0002</b>    | 0.0571           | -0.1175           | <b>0.0016</b> | 90 ± 8     | 86 ± 7     | 135 ± 13   | 141 ± 10   |
| 214688_at   | TLE4      | transducin-like enhancer of split 4 homolog, Drosophila) | 0.1134           | <b>-0.0428</b>    | -0.4730          | -0.3002           | <b>0.0285</b> | 121 ± 10   | 123 ± 10   | 107 ± 16   | 179 ± 26   |
| 206415_at   | TLL1      | tolloid-like 1                                           | <b>0.0503</b>    | <b>-0.0293</b>    | 0.0840           | -0.3975           | <b>0.0103</b> | 32 ± 3     | 28 ± 5     | 33 ± 5     | 67 ± 15    |
| 208942_s_at | TLOC1     | translocation protein 1                                  | <b>0.0074</b>    | -0.1167           | 0.4150           | -0.2947           | <b>0.0269</b> | 2138 ± 96  | 2214 ± 163 | 2738 ± 172 | 2411 ± 124 |
| 210176_at   | TLR1      | toll-like receptor 1                                     | 0.0766           | <b>-0.0018</b>    | -0.3761          | <b>-0.0390</b>    | <b>0.0162</b> | 71 ± 9     | 93 ± 16    | 100 ± 4    | 120 ± 7    |
| 209108_at   | TM4SF6    | transmembrane 4 superfamily member 6                     | 0.2463           | <b>-0.0003</b>    | -0.3779          | -0.1027           | <b>0.0075</b> | 526 ± 47   | 518 ± 40   | 616 ± 78   | 881 ± 111  |
| 217974_at   | TM7SF3    | seven transmembrane protein TM7SF3                       | -0.8483          | <b>-0.0293</b>    | -0.4844          | <b>-0.0116</b>    | 0.4008        | 159 ± 16   | 146 ± 22   | 164 ± 19   | 193 ± 19   |
| 221882_s_at | TMEM8     | transmembrane protein 8                                  | <b>0.0232</b>    | -0.5294           | <b>0.0337</b>    | -0.4415           | 0.5615        | 147 ± 13   | 174 ± 33   | 198 ± 35   | 227 ± 69   |
| 220177_s_at | TMPRSS3   | transmembrane protease, serine 3                         | 0.2412           | <b>-0.0226</b>    | 0.1712           | -0.4257           | 0.0644        | 175 ± 16   | 147 ± 15   | 210 ± 20   | 229 ± 29   |
| 201645_at   | TNC       | tenascin C                                               | 0.2291           | <b>-0.0475</b>    | <b>0.0459</b>    | -0.4827           | 0.0633        | 231 ± 46   | 284 ± 46   | 479 ± 100  | 391 ± 35   |
| 202644_s_at | TNFAIP3   | tumor necrosis factor, alpha-induced protein 3           | <b>0.0177</b>    | <b>-0.0070</b>    | 0.0628           | -0.3436           | <b>0.0137</b> | 289 ± 24   | 366 ± 30   | 335 ± 26   | 446 ± 45   |
| 209295_at   | TNFRSF10B | tumor necrosis factor receptor superfamily, member 10b   | 0.9726           | <b>-0.0366</b>    | -0.2500          | 0.2795            | 0.3513        | 385 ± 36   | 352 ± 21   | 396 ± 44   | 478 ± 78   |
| 204932_at   | TNFRSF11B | tumor necrosis factor receptor superfamily, member 11b   | <b>0.0240</b>    | <b>-0.0018</b>    | <b>0.0407</b>    | -0.1543           | <b>0.0031</b> | 48 ± 4     | 59 ± 6     | 74 ± 12    | 109 ± 16   |
| 207643_s_at | TNFRSF1A  | tumor necrosis factor receptor superfamily, member 1A    | <b>0.0207</b>    | <b>-0.0163</b>    | 0.0995           | -0.4246           | <b>0.0240</b> | 563 ± 44   | 743 ± 72   | 700 ± 72   | 895 ± 90   |
| 207536_s_at | TNFRSF9   | tumor necrosis factor receptor superfamily, member 9     | <b>0.0028</b>    | <b>-0.0428</b>    | <b>0.0490</b>    | 0.4553            | <b>0.0101</b> | 116 ± 8    | 173 ± 26   | 146 ± 7    | 239 ± 42   |
| 202687_s_at | TNFSF10   | tumor necrosis factor superfamily, member 10             | <b>0.0134</b>    | -0.2852           | 0.2810           | -0.2411           | 0.3852        | 50 ± 8     | 69 ± 9     | 70 ± 15    | 91 ± 27    |
| 217931_at   | TNRC5     | trinucleotide repeat containing 5                        | <b>0.0064</b>    | <b>-0.0369</b>    | <b>0.0095</b>    | -0.1251           | 0.0788        | 237 ± 16   | 312 ± 37   | 308 ± 23   | 403 ± 75   |
| 206093_x_at | TNXB      | tenascin XB                                              | <b>0.0008</b>    | <b>-0.0023</b>    | -0.2677          | -0.2116           | <b>0.0057</b> | 262 ± 39   | 225 ± 28   | 460 ± 39   | 412 ± 83   |
| 213451_x_at | TNXB      | tenascin XB                                              | <b>0.0001</b>    | <b>-0.0026</b>    | 0.3414           | <b>-0.0126</b>    | <b>0.0062</b> | 198 ± 45   | 236 ± 53   | 447 ± 45   | 388 ± 68   |
| 216333_x_at | TNXB      | tenascin XB                                              | <b>0.0002</b>    | <b>-0.0121</b>    | <b>0.0109</b>    | <b>-0.0060</b>    | <b>0.0003</b> | 163 ± 24   | 236 ± 47   | 451 ± 47   | 332 ± 55   |
| 222243_s_at | TOB2      | transducer of ERBB2, 2                                   | <b>0.0020</b>    | <b>-0.0011</b>    | -0.3341          | <b>-0.0540</b>    | <b>0.0476</b> | 794 ± 106  | 881 ± 108  | 1132 ± 74  | 1189 ± 153 |
| 221496_s_at | TOB2      | transducer of ERBB2, 2                                   | <b>0.0071</b>    | <b>-0.0014</b>    | 0.1255           | -0.3897           | <b>0.0355</b> | 406 ± 86   | 506 ± 154  | 805 ± 136  | 1017 ± 228 |
| 202807_s_at | TOM1      | target of myb1                                           | <b>0.0059</b>    | -0.0865           | 0.1112           | -0.2997           | <b>0.0236</b> | 255 ± 22   | 230 ± 20   | 376 ± 22   | 316 ± 59   |
| 204946_s_at | TOP3A     | topoisomerase III alpha                                  | <b>0.0429</b>    | -0.3092           | 0.1462           | -0.3943           | 0.3966        | 371 ± 38   | 471 ± 76   | 398 ± 46   | 523 ± 111  |
| 201746_at   | TP53      | tumor protein p53                                        | <b>0.0053</b>    | <b>-0.0211</b>    | 0.1652           | -0.3715           | 0.0912        | 166 ± 20   | 203 ± 27   | 238 ± 26   | 265 ± 41   |
| 204071_s_at | TP53BPL   | tumor protein p53-binding protein                        | <b>0.0054</b>    | <b>-0.0199</b>    | <b>0.0400</b>    | -0.1030           | 0.0925        | 233 ± 9    | 264 ± 22   | 270 ± 29   | 324 ± 31   |
| 201691_s_at | TPD52     | tumor protein D52                                        | <b>0.0017</b>    | <b>-0.0030</b>    | <b>0.0206</b>    | 0.4724            | <b>0.0047</b> | 222 ± 19   | 263 ± 17   | 294 ± 28   | 362 ± 35   |
| 203786_s_at | TPD52L1   | tumor protein D52-like 1                                 | 0.1937           | <b>-0.0273</b>    | -0.1000          | <b>-0.0374</b>    | 0.1145        | 2979 ± 178 | 3119 ± 229 | 3012 ± 332 | 4117 ± 598 |
| 201379_s_at | TPD52L2   | tumor protein D52-like 2                                 | <b>0.0048</b>    | -0.5364           | 0.2441           | -0.4572           | 0.1182        | 652 ± 68   | 761 ± 109  | 990 ± 66   | 740 ± 161  |

| Probe set   | Name     | Description                                             | NFT <sub>0</sub> | MMSE <sub>0</sub> | NFT <sub>1</sub> | MMSE <sub>1</sub> | ANOVA         | Control     | Incipient   | Moderate    | Severe      |
|-------------|----------|---------------------------------------------------------|------------------|-------------------|------------------|-------------------|---------------|-------------|-------------|-------------|-------------|
| 210050_at   | TPI1     | triosephosphate isomerase 1                             | <b>0.0410</b>    | -0.1561           | -0.1123          | 0.4421            | 0.2218        | 166 ± 10    | 128 ± 17    | 176 ± 8     | 196 ± 41    |
| 203671_at   | TPMT     | thiopurine S-methyltransferase                          | 0.1615           | <b>-0.0012</b>    | 0.0561           | -0.1834           | <b>0.0077</b> | 284 ± 36    | 322 ± 23    | 383 ± 20    | 469 ± 57    |
| 218855_at   | TPRA40   | seven transmembrane domain orphan receptor              | <b>0.0168</b>    | -0.2582           | -0.2730          | 0.3201            | 0.4693        | 222 ± 16    | 237 ± 20    | 267 ± 21    | 268 ± 39    |
| 220865_s_at | TPT      | trans-prenyltransferase                                 | 0.2911           | <b>-0.0165</b>    | <b>0.0521</b>    | <b>-0.0410</b>    | 0.0691        | 264 ± 21    | 292 ± 19    | 278 ± 34    | 362 ± 27    |
| 211943_x_at | TPT1     | tumor protein, translationally-controlled 1             | 0.1925           | <b>-0.0405</b>    | <b>-0.0026</b>   | 0.3018            | 0.1084        | 16377 ± 877 | 5133 ± 1005 | 3637 ± 1213 | 8266 ± 1229 |
| 220205_at   | TPTE     | transmembrane phosphatase with tensin homology          | 0.6237           | <b>-0.0317</b>    | 0.0599           | -0.2294           | 0.0731        | 38 ± 7      | 57 ± 11     | 49 ± 11     | 83 ± 18     |
| 201398_s_at | TRAM     | translocating chain-associating membrane protein        | 0.3401           | <b>-0.0005</b>    | 0.2403           | <b>-0.0534</b>    | <b>0.0280</b> | 1596 ± 80   | 1807 ± 103  | 2141 ± 124  | 2218 ± 267  |
| 213043_s_at | TRAP100  | thyroid hormone receptor-associated protein             | 0.0597           | <b>-0.0485</b>    | -0.2229          | -0.4669           | 0.1912        | 591 ± 38    | 540 ± 17    | 624 ± 61    | 708 ± 65    |
| 201986_at   | TRAP240  | thyroid hormone receptor-associated protein             | <b>0.0027</b>    | <b>-0.0063</b>    | 0.3155           | -0.1257           | <b>0.0475</b> | 1278 ± 74   | 1446 ± 109  | 1468 ± 90   | 1664 ± 99   |
| 213193_x_at | TRB      | T cell receptor beta locus                              | <b>0.0254</b>    | <b>-0.0319</b>    | 0.0866           | -0.1659           | 0.1197        | 328 ± 38    | 383 ± 51    | 377 ± 33    | 512 ± 88    |
| 34689_at    | TREX1    | three prime repair exonuclease 1                        | 0.0831           | <b>-0.0176</b>    | 0.1211           | -0.0637           | <b>0.0251</b> | 759 ± 42    | 885 ± 59    | 870 ± 62    | 1059 ± 95   |
| 207891_s_at | TREX2    | three prime repair exonuclease 2                        | <b>0.0488</b>    | -0.0640           | 0.2984           | <b>-0.0508</b>    | 0.3501        | 282 ± 29    | 344 ± 23    | 338 ± 32    | 397 ± 80    |
| 213334_x_at | TREX2    | three prime repair exonuclease 2                        | 0.1386           | <b>-0.0008</b>    | -0.3420          | -0.3220           | <b>0.0256</b> | 643 ± 68    | 558 ± 37    | 755 ± 58    | 949 ± 132   |
| 218425_at   | TRIAD3   | TRIAD3 protein                                          | <b>0.0203</b>    | -0.3308           | <b>0.0550</b>    | -0.0816           | 0.2094        | 340 ± 32    | 455 ± 41    | 486 ± 25    | 463 ± 97    |
| 210579_s_at | TRIM10   | tripartite motif-containing 10                          | 0.4299           | <b>-0.0071</b>    | <b>0.0511</b>    | -0.0920           | <b>0.0176</b> | 91 ± 21     | 120 ± 16    | 83 ± 16     | 208 ± 49    |
| 203147_s_at | TRIM14   | tripartite motif-containing 14                          | 0.5999           | <b>-0.0382</b>    | 0.0999           | -0.1836           | 0.2182        | 336 ± 37    | 348 ± 47    | 435 ± 26    | 474 ± 89    |
| 203148_s_at | TRIM14   | tripartite motif-containing 14                          | <b>0.0159</b>    | <b>-0.0057</b>    | 0.0854           | 0.3826            | <b>0.0182</b> | 161 ± 17    | 220 ± 38    | 268 ± 22    | 342 ± 70    |
| 202702_at   | TRIM26   | tripartite motif-containing 26                          | 0.0738           | <b>-0.0002</b>    | 0.3671           | -0.2454           | <b>0.0008</b> | 447 ± 30    | 513 ± 16    | 468 ± 28    | 655 ± 51    |
| 203568_s_at | TRIM38   | tripartite motif-containing 38                          | 0.3111           | <b>-0.0378</b>    | <b>0.0073</b>    | <b>-0.0026</b>    | 0.3079        | 202 ± 19    | 264 ± 14    | 262 ± 41    | 292 ± 53    |
| 202734_at   | TRIP10   | thyroid hormone receptor interactor 10                  | <b>0.0172</b>    | <b>-0.0498</b>    | 0.3782           | -0.3294           | 0.2308        | 428 ± 52    | 559 ± 97    | 590 ± 67    | 670 ± 122   |
| 203732_at   | TRIP4    | thyroid hormone receptor interactor 4                   | 0.1021           | <b>-0.0063</b>    | -0.2594          | -0.0905           | <b>0.0025</b> | 398 ± 17    | 429 ± 33    | 366 ± 13    | 509 ± 30    |
| 202656_s_at | TRIP-Br2 | transcript. reg. interacting with the PHS-bromodomain 2 | <b>0.0002</b>    | <b>0.0000</b>     | 0.2766           | -0.1218           | <b>0.0002</b> | 425 ± 26    | 477 ± 33    | 596 ± 38    | 670 ± 50    |
| 212318_at   | TRN-SR   | transportin-SR                                          | <b>0.0078</b>    | <b>-0.0136</b>    | 0.2962           | -0.2555           | <b>0.0357</b> | 757 ± 63    | 738 ± 39    | 964 ± 70    | 1083 ± 151  |
| 218502_s_at | TRPS1    | trichorhinophalangeal syndrome I                        | <b>0.0169</b>    | <b>-0.0163</b>    | 0.1541           | -0.3020           | 0.0692        | 666 ± 89    | 793 ± 117   | 1044 ± 137  | 998 ± 100   |
| 219632_s_at | TRPV1    | transient receptor potential cation channel, V1         | <b>0.0073</b>    | -0.0696           | 0.1670           | 0.4987            | 0.0741        | 327 ± 34    | 420 ± 62    | 398 ± 32    | 592 ± 126   |
| 212689_s_at | TSGA     | zinc finger protein                                     | 0.0668           | <b>-0.0156</b>    | -0.3911          | -0.2230           | 0.2925        | 766 ± 67    | 810 ± 71    | 896 ± 45    | 978 ± 131   |
| 214606_at   | TSPAN-2  | tetraspan 2                                             | <b>0.0427</b>    | -0.1270           | 0.0584           | 0.2183            | 0.0692        | 20 ± 5      | 30 ± 9      | 26 ± 4      | 46 ± 9      |
| 209890_at   | TSPAN-5  | tetraspan 5                                             | <b>0.0336</b>    | <b>-0.0055</b>    | 0.3119           | <b>-0.0086</b>    | <b>0.0455</b> | 225 ± 9     | 259 ± 31    | 264 ± 40    | 354 ± 35    |
| 213968_at   | TSPAN-5  | tetraspan 5                                             | <b>0.0358</b>    | <b>-0.0168</b>    | <b>0.0430</b>    | <b>-0.0235</b>    | <b>0.0331</b> | 82 ± 12     | 115 ± 12    | 110 ± 25    | 187 ± 40    |
| 209803_s_at | TSSC3    | tumor suppressing subtransferable candidate 3           | <b>0.0384</b>    | -0.0625           | <b>-0.0085</b>   | 0.3506            | 0.0790        | 60 ± 11     | 34 ± 14     | 61 ± 15     | 92 ± 18     |
| 204771_s_at | TTF1     | transcription termination factor, RNA polymerase I      | <b>0.0304</b>    | -0.0653           | -0.3904          | 0.3638            | 0.1252        | 372 ± 19    | 361 ± 11    | 476 ± 52    | 456 ± 52    |
| 204772_s_at | TTF1     | transcription termination factor, RNA polymerase I      | <b>0.0008</b>    | <b>-0.0039</b>    | 0.2616           | -0.0552           | <b>0.0162</b> | 177 ± 13    | 170 ± 27    | 212 ± 15    | 283 ± 41    |
| 219728_at   | TTID     | titin immunoglobulin domain protein                     | 0.3587           | <b>-0.0302</b>    | 0.4675           | -0.0786           | 0.1657        | 252 ± 42    | 378 ± 52    | 530 ± 159   | 515 ± 77    |
| 208195_at   | TTN      | titin                                                   | <b>0.0050</b>    | <b>0.0000</b>     | <b>0.0059</b>    | <b>-0.0187</b>    | <b>0.0001</b> | 124 ± 12    | 165 ± 19    | 168 ± 18    | 286 ± 32    |
| 211460_at   | TTY9     | testis-specific transcript, Y-linked 9                  | <b>0.0363</b>    | -0.1631           | <b>0.0267</b>    | -0.4758           | 0.1257        | 133 ± 11    | 195 ± 45    | 155 ± 12    | 232 ± 44    |
| 209074_s_at | TU3A     | TU3A protein                                            | <b>0.0001</b>    | <b>-0.0002</b>    | 0.1100           | -0.0901           | <b>0.0016</b> | 11683 ± 777 | 2319 ± 1038 | 6105 ± 756  | 6779 ± 1386 |
| 207547_s_at | TU3A     | TU3A protein                                            | <b>0.0188</b>    | <b>-0.0045</b>    | 0.3494           | -0.1434           | <b>0.0013</b> | 8632 ± 884  | 8454 ± 416  | 3215 ± 898  | 11306 ± 980 |
| 210527_x_at | TUBA2    | tubulin, alpha 2                                        | 0.1207           | <b>-0.0184</b>    | 0.2401           | -0.3468           | 0.0671        | 455 ± 34    | 496 ± 25    | 506 ± 50    | 603 ± 34    |
| 209118_s_at | TUBA3    | tubulin, alpha 3                                        | <b>0.0225</b>    | <b>-0.0270</b>    | 0.4465           | -0.1753           | 0.0798        | 17518 ± 697 | 5982 ± 1634 | 214 ± 1907  | 0551 ± 1861 |
| 220069_at   | TUBA8    | tubulin, alpha 8                                        | 0.1944           | <b>-0.0196</b>    | 0.3686           | 0.1901            | 0.0958        | 66 ± 6      | 78 ± 13     | 92 ± 10     | 115 ± 22    |
| 205854_at   | TULP3    | tubby like protein 3                                    | <b>0.0010</b>    | <b>-0.0300</b>    | 0.4674           | -0.4840           | 0.1208        | 470 ± 66    | 481 ± 75    | 591 ± 55    | 746 ± 141   |
| 201009_s_at | TXNIP    | thioredoxin interacting protein                         | <b>0.0020</b>    | -0.0559           | 0.0682           | -0.1020           | 0.0793        | 1333 ± 152  | 1840 ± 221  | 2148 ± 152  | 2017 ± 364  |

| Probe set   | Name      | Description                                                    | NFT <sub>0</sub> | MMSE <sub>0</sub> | NFT <sub>1</sub> | MMSE <sub>1</sub> | ANOVA         | Control    | Incipient  | Moderate   | Severe     |
|-------------|-----------|----------------------------------------------------------------|------------------|-------------------|------------------|-------------------|---------------|------------|------------|------------|------------|
| 201010_s_at | TXNIP     | thioredoxin interacting protein                                | <b>0.0366</b>    | -0.0629           | 0.2336           | -0.3598           | 0.1092        | 3342 ± 546 | 4285 ± 516 | 5646 ± 693 | 4997 ± 980 |
| 205546_s_at | TYK2      | tyrosine kinase 2                                              | <b>0.0372</b>    | -0.0565           | -0.3490          | <b>-0.0534</b>    | 0.0864        | 365 ± 50   | 505 ± 57   | 564 ± 68   | 538 ± 49   |
| 205300_s_at | U1SNRNPBP | U1-snRNP binding protein homolog                               | <b>0.0067</b>    | -0.1553           | -0.2911          | 0.2136            | 0.2862        | 213 ± 18   | 198 ± 25   | 243 ± 20   | 292 ± 62   |
| 213876_x_at | U2AF1RS2  | U2 small nuc. ribonucleoprotein auxiliary factor, small sub. 2 | <b>0.0029</b>    | <b>-0.0028</b>    | 0.4005           | 0.1366            | <b>0.0117</b> | 1007 ± 68  | 962 ± 126  | 1230 ± 122 | 1782 ± 300 |
| 208174_x_at | U2AF1RS2  | U2 small nuc. ribonucleoprotein auxiliary factor, small sub. 2 | <b>0.0038</b>    | <b>-0.0404</b>    | 0.1980           | -0.4998           | 0.1201        | 1129 ± 102 | 1359 ± 294 | 1312 ± 139 | 1791 ± 224 |
| 218381_s_at | U2AF65    | U2 small nuclear ribonucleoprotein auxiliary factor            | 0.1736           | <b>-0.0317</b>    | <b>-0.0046</b>   | -0.3796           | <b>0.0079</b> | 756 ± 37   | 635 ± 29   | 875 ± 51   | 831 ± 54   |
| 219192_at   | UBAP2     | ubiquitin associated protein 2                                 | <b>0.0005</b>    | <b>-0.0506</b>    | 0.0809           | -0.2586           | 0.1268        | 778 ± 51   | 931 ± 110  | 1125 ± 95  | 1197 ± 231 |
| 202954_at   | UBE2C     | ubiquitin-conjugating enzyme E2C                               | 0.0761           | <b>-0.0146</b>    | 0.1097           | -0.1087           | <b>0.0333</b> | 385 ± 21   | 417 ± 28   | 408 ± 21   | 551 ± 70   |
| 200676_s_at | UBE2L3    | ubiquitin-conjugating enzyme E2L 3                             | <b>0.0230</b>    | -0.3251           | -0.2593          | -0.3165           | 0.1420        | 1172 ± 97  | 1166 ± 64  | 1557 ± 153 | 1275 ± 190 |
| 201003_x_at | UBE2V1    | ubiquitin-conjugating enzyme E2 variant 1                      | <b>0.0432</b>    | <b>-0.0014</b>    | 0.2601           | 0.3578            | <b>0.0018</b> | 689 ± 37   | 627 ± 17   | 724 ± 52   | 899 ± 50   |
| 213822_s_at | UBE3B     | ubiquitin protein ligase                                       | <b>0.0439</b>    | <b>-0.0003</b>    | -0.4631          | -0.1843           | <b>0.0020</b> | 184 ± 12   | 213 ± 40   | 223 ± 25   | 345 ± 18   |
| 209088_s_at | UBN1      | ubiquitin 1                                                    | <b>0.0234</b>    | <b>-0.0052</b>    | 0.1980           | <b>-0.0516</b>    | <b>0.0131</b> | 392 ± 42   | 406 ± 39   | 461 ± 29   | 704 ± 128  |
| 205687_at   | UBPH      | similar to ubiquitin binding protein                           | <b>0.0255</b>    | -0.0580           | -0.4609          | 0.1409            | <b>0.0353</b> | 223 ± 10   | 235 ± 20   | 222 ± 21   | 319 ± 44   |
| 206072_at   | UCN       | urocortin                                                      | <b>0.0379</b>    | <b>-0.0042</b>    | -0.4247          | -0.4671           | 0.0782        | 124 ± 17   | 112 ± 19   | 161 ± 22   | 215 ± 45   |
| 204881_s_at | UGCG      | UDP-glucose ceramide glucosyltransferase                       | 0.1100           | <b>-0.0123</b>    | -0.0983          | -0.2782           | <b>0.0477</b> | 544 ± 27   | 558 ± 37   | 625 ± 39   | 667 ± 27   |
| 221304_at   | UGT1A     | UDP glycosyltransferase 1 family, polypeptide A cluster        | 0.2831           | <b>-0.0213</b>    | <b>0.0476</b>    | -0.1752           | <b>0.0113</b> | 74 ± 9     | 88 ± 8     | 68 ± 7     | 123 ± 18   |
| 206094_x_at | UGT1A6    | UDP glycosyltransferase 1 family, polypeptide A6               | 0.0845           | <b>-0.0153</b>    | <b>0.0327</b>    | -0.4902           | <b>0.0146</b> | 200 ± 12   | 237 ± 37   | 228 ± 29   | 336 ± 33   |
| 204063_s_at | ULK2      | unc-51-like kinase 2                                           | 0.3861           | <b>-0.0324</b>    | 0.3022           | 0.4991            | 0.0712        | 446 ± 36   | 408 ± 22   | 434 ± 20   | 543 ± 47   |
| 212144_at   | UNC84B    | unc-84 homolog B                                               | <b>0.0249</b>    | <b>-0.0083</b>    | -0.1889          | -0.0949           | 0.1144        | 1657 ± 188 | 1813 ± 174 | 2261 ± 306 | 2366 ± 242 |
| 202330_s_at | UNG       | uracil-DNA glycosylase                                         | <b>0.0164</b>    | <b>-0.0148</b>    | -0.2500          | -0.0828           | <b>0.0352</b> | 417 ± 36   | 427 ± 11   | 531 ± 35   | 522 ± 37   |
| 214323_s_at | UPF3A     | similar to yeast Upf3, variant A                               | 0.6766           | <b>-0.0295</b>    | 0.4306           | -0.0881           | 0.3369        | 1877 ± 56  | 2054 ± 221 | 2182 ± 204 | 2313 ± 169 |
| 222236_s_at | UPLC1     | up-regulated in liver cancer 1                                 | <b>0.0029</b>    | <b>-0.0212</b>    | -0.2315          | -0.2488           | 0.1559        | 449 ± 63   | 494 ± 33   | 528 ± 29   | 634 ± 81   |
| 208971_at   | UROD      | uroporphyrinogen decarboxylase                                 | <b>0.0146</b>    | -0.2858           | 0.0884           | <b>-0.0153</b>    | 0.3630        | 373 ± 26   | 416 ± 32   | 464 ± 23   | 441 ± 68   |
| 214879_x_at | USF2      | upstream transcription factor 2, c-fos interacting             | <b>0.0307</b>    | -0.0687           | 0.0761           | -0.1302           | 0.1382        | 523 ± 100  | 711 ± 111  | 645 ± 83   | 861 ± 107  |
| 202152_x_at | USF2      | upstream transcription factor 2, c-fos interacting             | 0.1494           | <b>-0.0250</b>    | 0.1606           | 0.3764            | 0.1205        | 1178 ± 107 | 1321 ± 162 | 1321 ± 79  | 1682 ± 226 |
| 202413_s_at | USP1      | ubiquitin specific protease 1                                  | <b>0.0362</b>    | <b>-0.0028</b>    | 0.2163           | <b>-0.0304</b>    | <b>0.0357</b> | 615 ± 25   | 700 ± 60   | 818 ± 56   | 802 ± 66   |
| 209136_s_at | USP10     | ubiquitin specific protease 10                                 | <b>0.0400</b>    | -0.3576           | 0.4631           | 0.3590            | 0.4683        | 216 ± 17   | 211 ± 20   | 202 ± 22   | 258 ± 42   |
| 205356_at   | USP13     | ubiquitin specific protease 13                                 | <b>0.0082</b>    | -0.0799           | 0.1951           | -0.4696           | 0.1907        | 506 ± 27   | 537 ± 40   | 544 ± 62   | 679 ± 92   |
| 214674_at   | USP19     | ubiquitin specific protease 19                                 | 0.0744           | <b>-0.0118</b>    | <b>0.0007</b>    | <b>-0.0251</b>    | <b>0.0021</b> | 107 ± 7    | 208 ± 23   | 184 ± 27   | 229 ± 23   |
| 200083_at   | USP22     | ubiquitin specific protease 22                                 | <b>0.0168</b>    | -0.2529           | 0.2062           | 0.3971            | 0.2349        | 2573 ± 114 | 2652 ± 161 | 2909 ± 107 | 2933 ± 219 |
| 221654_s_at | USP3      | ubiquitin specific protease 3                                  | 0.2221           | <b>-0.0010</b>    | -0.1238          | 0.4590            | <b>0.0088</b> | 314 ± 23   | 313 ± 15   | 328 ± 21   | 446 ± 48   |
| 211800_s_at | USP4      | ubiquitin specific protease 4                                  | 0.3448           | <b>-0.0044</b>    | 0.1192           | -0.1600           | <b>0.0456</b> | 733 ± 37   | 777 ± 33   | 852 ± 25   | 871 ± 45   |
| 202682_s_at | USP4      | ubiquitin specific protease 4                                  | 0.0971           | <b>-0.0050</b>    | 0.1366           | -0.1162           | 0.1598        | 1196 ± 76  | 1189 ± 87  | 1389 ± 117 | 1594 ± 223 |
| 201498_at   | USP7      | ubiquitin specific protease 7                                  | <b>0.0121</b>    | -0.1105           | 0.4675           | -0.4097           | 0.1883        | 1397 ± 77  | 1464 ± 82  | 1646 ± 121 | 1804 ± 234 |
| 205139_s_at | UST       | uronyl-2-sulfotransferase                                      | <b>0.0095</b>    | <b>-0.0170</b>    | 0.2404           | 0.4676            | <b>0.0150</b> | 351 ± 15   | 337 ± 31   | 462 ± 39   | 459 ± 34   |
| 203991_s_at | UTX       | ubiquitously transcribed tetratricopeptide repeat gene X chrom | <b>0.0000</b>    | <b>-0.0071</b>    | -0.3630          | -0.4187           | <b>0.0066</b> | 226 ± 15   | 260 ± 35   | 376 ± 26   | 360 ± 48   |
| 203241_at   | UVRAG     | UV radiation resistance associated gene                        | 0.5963           | <b>-0.0300</b>    | <b>-0.0057</b>   | 0.0995            | <b>0.0418</b> | 370 ± 12   | 329 ± 43   | 353 ± 15   | 439 ± 27   |
| 201336_at   | VAMP3     | vesicle-associated membrane protein 3                          | <b>0.0120</b>    | <b>-0.0041</b>    | 0.4627           | -0.3955           | <b>0.0338</b> | 2793 ± 240 | 3110 ± 425 | 3813 ± 281 | 4085 ± 404 |
| 208626_s_at | VAT1      | vesicle amine transport protein 1 homolog                      | <b>0.0329</b>    | -0.0792           | -0.3879          | -0.1109           | 0.3873        | 905 ± 107  | 1035 ± 94  | 1110 ± 135 | 1152 ± 80  |
| 203868_s_at | VCAM1     | vascular cell adhesion molecule 1                              | <b>0.0476</b>    | <b>-0.0100</b>    | 0.3036           | -0.0610           | 0.0610        | 185 ± 32   | 221 ± 27   | 350 ± 86   | 358 ± 31   |
| 214843_s_at | VDU1      | pVHL-interacting deubiquitinating enzyme 1                     | 0.2428           | <b>-0.0113</b>    | <b>0.0512</b>    | -0.1063           | 0.1790        | 472 ± 25   | 500 ± 35   | 551 ± 13   | 590 ± 71   |
| 203683_s_at | VEGFB     | vascular endothelial growth factor B                           | 0.1062           | <b>-0.0186</b>    | 0.0747           | 0.4652            | 0.1145        | 332 ± 12   | 397 ± 43   | 411 ± 41   | 494 ± 77   |

| Probe set   | Name     | Description                                                | NFT <sub>0</sub> | MMSE <sub>0</sub> | NFT <sub>1</sub> | MMSE <sub>1</sub> | ANOVA         | Control    | Incipient  | Moderate   | Severe     |
|-------------|----------|------------------------------------------------------------|------------------|-------------------|------------------|-------------------|---------------|------------|------------|------------|------------|
| 209946_at   | VEGFC    | vascular endothelial growth factor C                       | 0.1971           | -0.0003           | 0.2166           | -0.1999           | <b>0.0113</b> | 152 ± 19   | 141 ± 19   | 159 ± 6    | 238 ± 31   |
| 203255_at   | VIT1     | vitiligo-associated protein VIT-1                          | <b>0.0054</b>    | <b>-0.0066</b>    | -0.3252          | -0.4356           | <b>0.0270</b> | 813 ± 110  | 629 ± 63   | 1033 ± 81  | 1192 ± 195 |
| 207671_s_at | VMD2     | vitelliform macular dystrophy                              | <b>0.0154</b>    | -0.2132           | -0.3657          | -0.3952           | 0.3530        | 258 ± 36   | 338 ± 64   | 303 ± 37   | 383 ± 67   |
| 203292_s_at | VPS11    | vacuolar protein sorting 11                                | 0.4016           | <b>-0.0474</b>    | 0.0573           | -0.3676           | 0.0595        | 886 ± 60   | 908 ± 68   | 870 ± 62   | 1127 ± 89  |
| 205126_at   | VRK2     | vaccinia related kinase 2                                  | 0.1704           | <b>-0.0024</b>    | -0.4979          | -0.1383           | 0.0759        | 439 ± 39   | 502 ± 44   | 521 ± 41   | 672 ± 109  |
| 221593_s_at | VRP      | vascular Rab-GAP/TBC-containing                            | 0.0752           | <b>-0.0372</b>    | 0.1684           | -0.0774           | 0.3441        | 472 ± 47   | 507 ± 34   | 523 ± 23   | 590 ± 66   |
| 38964_r_at  | WAS      | Wiskott-Aldrich syndrome                                   | 0.1578           | <b>-0.0080</b>    | <b>0.0339</b>    | -0.2478           | <b>0.0251</b> | 1682 ± 175 | 2132 ± 324 | 1683 ± 153 | 2946 ± 505 |
| 221725_at   | WASF2    | WAS protein family, member 2                               | <b>0.0063</b>    | <b>-0.0020</b>    | 0.4336           | -0.1712           | <b>0.0232</b> | 592 ± 67   | 693 ± 100  | 801 ± 54   | 949 ± 100  |
| 221247_s_at | WBSCR16  | Williams-Beuren syndrome chromosome region 16              | 0.1451           | <b>-0.0280</b>    | 0.2930           | 0.4353            | 0.1813        | 370 ± 18   | 416 ± 40   | 439 ± 20   | 468 ± 49   |
| 213670_x_at | WBSCR20B | Williams-Beuren Syndrome critical region protein 20 copy B | <b>0.0115</b>    | -0.5489           | <b>-0.0301</b>   | -0.2821           | 0.7051        | 378 ± 36   | 353 ± 67   | 445 ± 31   | 427 ± 104  |
| 213460_x_at | WBSCR20B | Williams-Beuren Syndrome critical region protein 20 copy B | <b>0.0232</b>    | -0.1149           | -0.1290          | 0.3295            | 0.2308        | 577 ± 42   | 537 ± 76   | 563 ± 30   | 732 ± 115  |
| 211768_at   | WBSCR5   | Williams-Beuren syndrome chromosome region 5               | <b>0.0095</b>    | <b>-0.0109</b>    | -0.3131          | 0.0705            | <b>0.0266</b> | 199 ± 23   | 167 ± 13   | 233 ± 27   | 329 ± 59   |
| 217734_s_at | WDR6     | WD repeat domain 6                                         | <b>0.0018</b>    | <b>-0.0121</b>    | -0.2191          | -0.2255           | 0.1072        | 1095 ± 136 | 1158 ± 98  | 1469 ± 146 | 1650 ± 286 |
| 203892_at   | WFDC2    | WAP four-disulfide core domain 2                           | 0.1074           | <b>-0.0181</b>    | 0.3771           | 0.2102            | <b>0.0384</b> | 229 ± 22   | 217 ± 27   | 309 ± 23   | 339 ± 51   |
| 202908_at   | WFS1     | Wolfram syndrome 1                                         | <b>0.0297</b>    | -0.5950           | -0.2990          | 0.4335            | 0.0925        | 1434 ± 121 | 1411 ± 112 | 1836 ± 155 | 1454 ± 128 |
| 203112_s_at | WHSC2    | Wolf-Hirschhorn syndrome candidate 2                       | <b>0.0389</b>    | -0.1075           | 0.1413           | -0.0696           | <b>0.0169</b> | 279 ± 20   | 327 ± 21   | 413 ± 22   | 332 ± 49   |
| 34225_at    | WHSC2    | Wolf-Hirschhorn syndrome candidate 2                       | 0.0571           | <b>-0.0013</b>    | -0.3942          | -0.1258           | <b>0.0158</b> | 435 ± 26   | 474 ± 11   | 500 ± 40   | 594 ± 42   |
| 212050_at   | WIRE     | WIRE protein                                               | <b>0.0183</b>    | <b>-0.0502</b>    | 0.0931           | -0.3836           | 0.1597        | 1550 ± 84  | 1773 ± 172 | 1856 ± 129 | 1968 ± 157 |
| 217681_at   | WNT7B    | wingless-type MMTV integration site family, member 7B      | 0.4679           | <b>-0.0473</b>    | 0.2906           | -0.4688           | 0.0730        | 93 ± 15    | 89 ± 25    | 96 ± 23    | 172 ± 32   |
| 205667_at   | WRN      | Werner syndrome                                            | 0.4775           | <b>-0.0413</b>    | 0.2670           | -0.0975           | 0.1858        | 175 ± 14   | 167 ± 19   | 213 ± 16   | 199 ± 17   |
| 218276_s_at | WW45     | WW45 protein                                               | <b>0.0011</b>    | <b>-0.0002</b>    | 0.4794           | -0.3976           | <b>0.0028</b> | 309 ± 11   | 323 ± 28   | 351 ± 21   | 435 ± 28   |
| 219077_s_at | WWOX     | WW domain containing oxidoreductase                        | 0.4111           | <b>-0.0026</b>    | -0.0585          | -0.2335           | <b>0.0539</b> | 1243 ± 109 | 1412 ± 189 | 1500 ± 106 | 1972 ± 296 |
| 204022_at   | WWP2     | Nedd4-like ubiquitin-protein ligase                        | <b>0.0472</b>    | -0.1550           | 0.0681           | 0.3055            | 0.2263        | 541 ± 14   | 607 ± 63   | 592 ± 62   | 706 ± 68   |
| 210200_at   | WWP2     | Nedd4-like ubiquitin-protein ligase                        | 0.0806           | <b>-0.0011</b>    | <b>0.0066</b>    | <b>-0.0105</b>    | <b>0.0036</b> | 216 ± 15   | 268 ± 19   | 241 ± 18   | 354 ± 43   |
| 213900_at   | X123     | Friedreich ataxia region gene X123                         | <b>0.0034</b>    | <b>-0.0007</b>    | 0.2036           | -0.3521           | <b>0.0089</b> | 835 ± 93   | 1026 ± 104 | 1221 ± 137 | 1533 ± 207 |
| 219126_at   | XAP135   | PHD zinc finger protein XAP135                             | <b>0.0473</b>    | <b>-0.0135</b>    | -0.0979          | -0.4817           | <b>0.0474</b> | 437 ± 40   | 393 ± 21   | 416 ± 43   | 573 ± 61   |
| 200670_at   | XBP1     | X-box binding protein 1                                    | <b>0.0110</b>    | -0.1117           | -0.3637          | -0.4808           | 0.1401        | 465 ± 45   | 450 ± 46   | 448 ± 36   | 596 ± 66   |
| 202933_s_at | YES1     | v-yes-1 Yamaguchi sarcoma viral oncogene homolog 1         | <b>0.0385</b>    | <b>-0.0042</b>    | <b>0.0391</b>    | <b>-0.0003</b>    | <b>0.0156</b> | 609 ± 56   | 847 ± 86   | 991 ± 125  | 942 ± 67   |
| 200047_s_at | YY1      | YY1 transcription factor                                   | 0.1469           | <b>-0.0372</b>    | -0.4687          | -0.2020           | 0.3365        | 1668 ± 53  | 1596 ± 103 | 1823 ± 108 | 1861 ± 181 |
| 213051_at   | ZAP      | likely ortholog of rat zinc-finger antiviral protein       | <b>0.0498</b>    | <b>-0.0005</b>    | -0.3714          | -0.4265           | <b>0.0400</b> | 714 ± 80   | 722 ± 88   | 877 ± 39   | 1137 ± 187 |
| 219266_at   | ZBRK1    | zinc-finger protein ZBRK1                                  | <b>0.0089</b>    | -0.1478           | <b>0.0012</b>    | -0.1152           | <b>0.0170</b> | 100 ± 8    | 155 ± 18   | 131 ± 10   | 158 ± 16   |
| 221646_s_at | ZDHC11   | zinc finger, DHHC domain containing 11                     | <b>0.0096</b>    | <b>-0.0202</b>    | -0.2738          | -0.1884           | <b>0.0245</b> | 835 ± 178  | 873 ± 97   | 1677 ± 285 | 1364 ± 242 |
| 219779_at   | ZFH4     | zinc finger homeodomain 4                                  | <b>0.0272</b>    | -0.1113           | 0.1320           | -0.1867           | 0.4714        | 684 ± 81   | 695 ± 71   | 796 ± 52   | 880 ± 160  |
| 213130_at   | ZFP100   | zinc finger protein ZFP100                                 | <b>0.0123</b>    | <b>-0.0033</b>    | -0.2703          | -0.4641           | <b>0.0442</b> | 153 ± 18   | 172 ± 19   | 210 ± 19   | 256 ± 42   |
| 201531_at   | ZFP36    | zinc finger protein 36, C3H type, homolog                  | 0.6731           | <b>-0.0278</b>    | <b>-0.0342</b>   | -0.3656           | 0.3619        | 803 ± 167  | 737 ± 212  | 999 ± 204  | 1300 ± 334 |
| 211962_s_at | ZFP36L1  | zinc finger protein 36, C3H type-like 1                    | 0.2179           | <b>-0.0104</b>    | <b>-0.0346</b>   | -0.1701           | 0.1437        | 1600 ± 135 | 1459 ± 191 | 2069 ± 235 | 2092 ± 339 |
| 211965_at   | ZFP36L1  | zinc finger protein 36, C3H type-like 1                    | <b>0.0088</b>    | <b>-0.0101</b>    | -0.1681          | -0.1960           | 0.0972        | 321 ± 49   | 322 ± 37   | 453 ± 56   | 490 ± 79   |
| 201368_at   | ZFP36L2  | zinc finger protein 36, C3H type-like 2                    | 0.7238           | <b>-0.0045</b>    | -0.3152          | -0.0679           | 0.1357        | 1486 ± 163 | 1660 ± 105 | 2105 ± 305 | 2219 ± 360 |
| 201369_s_at | ZFP36L2  | zinc finger protein 36, C3H type-like 2                    | <b>0.0119</b>    | <b>0.0000</b>     | 0.1361           | <b>-0.0031</b>    | <b>0.0011</b> | 177 ± 26   | 227 ± 23   | 238 ± 22   | 409 ± 66   |
| 214310_s_at | ZFPL1    | zinc finger protein-like 1                                 | <b>0.0041</b>    | -0.0657           | -0.3436          | -0.2014           | 0.1842        | 105 ± 14   | 108 ± 15   | 118 ± 8    | 164 ± 36   |
| 206373_at   | ZIC1     | Zic family member 1                                        | 0.0963           | <b>-0.0008</b>    | 0.2570           | -0.1077           | <b>0.0193</b> | 687 ± 91   | 1023 ± 124 | 1439 ± 202 | 1568 ± 335 |
| 221842_s_at | ZNF131   | zinc finger protein 131                                    | <b>0.0011</b>    | <b>-0.0492</b>    | 0.4043           | -0.4449           | <b>0.0060</b> | 505 ± 42   | 574 ± 95   | 837 ± 65   | 677 ± 58   |

| Probe set   | Name   | Description                            | NFT <sub>0</sub> | MMSE <sub>0</sub> | NFT <sub>1</sub> | MMSE <sub>1</sub> | ANOVA         | Control    | Incipient  | Moderate   | Severe     |
|-------------|--------|----------------------------------------|------------------|-------------------|------------------|-------------------|---------------|------------|------------|------------|------------|
| 37254_at    | ZNF133 | zinc finger protein 133                | <b>0.0157</b>    | <b>-0.0360</b>    | -0.2098          | 0.1119            | 0.0962        | 404 ± 13   | 387 ± 26   | 445 ± 31   | 500 ± 51   |
| 206240_s_at | ZNF136 | zinc finger protein 136                | <b>0.0039</b>    | <b>0.0000</b>     | <b>0.0098</b>    | <b>-0.0071</b>    | <b>0.0001</b> | 248 ± 13   | 321 ± 14   | 323 ± 30   | 480 ± 48   |
| 207394_at   | ZNF137 | zinc finger protein 137                | 0.2121           | <b>-0.0119</b>    | 0.3015           | -0.1603           | 0.2581        | 191 ± 18   | 197 ± 14   | 210 ± 20   | 243 ± 21   |
| 205883_at   | ZNF145 | zinc finger protein 145                | <b>0.0001</b>    | <b>-0.0142</b>    | -0.1180          | 0.1035            | <b>0.0247</b> | 1629 ± 100 | 1486 ± 174 | 2137 ± 318 | 2501 ± 292 |
| 203318_s_at | ZNF148 | zinc finger protein 148                | <b>0.0199</b>    | -0.1740           | <b>0.0544</b>    | -0.2266           | 0.2069        | 910 ± 96   | 1146 ± 153 | 1250 ± 113 | 1332 ± 229 |
| 203602_s_at | ZNF151 | zinc finger protein 151                | 0.0937           | <b>-0.0387</b>    | -0.2431          | 0.1093            | 0.0618        | 381 ± 23   | 372 ± 28   | 354 ± 24   | 504 ± 74   |
| 202173_s_at | ZNF161 | zinc finger protein 161                | 0.0762           | <b>-0.0023</b>    | 0.3347           | <b>-0.0528</b>    | <b>0.0296</b> | 479 ± 56   | 618 ± 84   | 770 ± 84   | 799 ± 103  |
| 202171_at   | ZNF161 | zinc finger protein 161                | 0.3381           | <b>-0.0428</b>    | -0.3664          | <b>-0.0544</b>    | 0.5698        | 528 ± 57   | 567 ± 78   | 591 ± 71   | 655 ± 48   |
| 202172_at   | ZNF161 | zinc finger protein 161                | <b>0.0477</b>    | <b>-0.0028</b>    | -0.4341          | -0.2214           | <b>0.0338</b> | 942 ± 91   | 1065 ± 133 | 1089 ± 42  | 1345 ± 79  |
| 205497_at   | ZNF175 | zinc finger protein 175                | <b>0.0370</b>    | -0.4099           | 0.4828           | 0.4024            | 0.4257        | 310 ± 28   | 335 ± 39   | 386 ± 15   | 341 ± 44   |
| 219495_s_at | ZNF180 | zinc finger protein 180                | 0.9872           | <b>-0.0375</b>    | 0.0582           | -0.1923           | 0.3723        | 177 ± 14   | 184 ± 23   | 182 ± 12   | 228 ± 36   |
| 204234_s_at | ZNF195 | zinc finger protein 195                | <b>0.0390</b>    | -0.4104           | -0.1744          | 0.4659            | 0.5731        | 298 ± 20   | 318 ± 24   | 361 ± 19   | 356 ± 73   |
| 210282_at   | ZNF198 | zinc finger protein 198                | -0.6918          | <b>-0.0065</b>    | -0.4328          | <b>-0.0098</b>    | 0.3303        | 61 ± 8     | 59 ± 12    | 67 ± 6     | 86 ± 16    |
| 202778_s_at | ZNF198 | zinc finger protein 198                | <b>0.0119</b>    | <b>-0.0137</b>    | 0.2370           | <b>-0.0015</b>    | <b>0.0046</b> | 929 ± 42   | 961 ± 43   | 1140 ± 37  | 1030 ± 41  |
| 204327_s_at | ZNF202 | zinc finger protein 202                | <b>0.0068</b>    | <b>-0.0290</b>    | -0.4696          | 0.4615            | 0.1103        | 285 ± 15   | 322 ± 33   | 329 ± 27   | 403 ± 51   |
| 205437_at   | ZNF211 | zinc finger protein 211                | 0.0657           | <b>-0.0412</b>    | 0.4292           | -0.4840           | 0.2890        | 324 ± 17   | 349 ± 17   | 365 ± 29   | 417 ± 60   |
| 202423_at   | ZNF220 | zinc finger protein 220                | <b>0.0064</b>    | <b>-0.0099</b>    | -0.2274          | -0.3115           | 0.1206        | 1533 ± 121 | 1603 ± 87  | 1884 ± 160 | 1925 ± 160 |
| 219123_at   | ZNF232 | zinc finger protein 232                | <b>0.0264</b>    | -0.0696           | 0.2808           | -0.3583           | 0.0920        | 322 ± 25   | 395 ± 54   | 357 ± 23   | 479 ± 69   |
| 47571_at    | ZNF236 | zinc finger protein 236                | 0.1353           | <b>-0.0078</b>    | 0.4862           | 0.4037            | <b>0.0314</b> | 373 ± 26   | 362 ± 8    | 374 ± 13   | 504 ± 64   |
| 206744_s_at | ZNF237 | zinc finger protein 237                | <b>0.0516</b>    | <b>-0.0092</b>    | 0.2369           | -0.2584           | <b>0.0063</b> | 51 ± 12    | 47 ± 7     | 51 ± 7     | 116 ± 23   |
| 215948_x_at | ZNF237 | zinc finger protein 237                | <b>0.0393</b>    | <b>-0.0042</b>    | 0.3199           | <b>-0.0229</b>    | <b>0.0185</b> | 90 ± 8     | 101 ± 14   | 144 ± 9    | 133 ± 18   |
| 203247_s_at | ZNF24  | zinc finger protein 24                 | <b>0.0036</b>    | <b>-0.0204</b>    | 0.4647           | <b>-0.0326</b>    | 0.1285        | 808 ± 84   | 951 ± 65   | 988 ± 90   | 1108 ± 105 |
| 206900_x_at | ZNF253 | zinc finger protein 253                | 0.0950           | <b>-0.0357</b>    | <b>0.0014</b>    | <b>-0.0328</b>    | <b>0.0342</b> | 203 ± 10   | 310 ± 33   | 283 ± 33   | 308 ± 30   |
| 206862_at   | ZNF254 | zinc finger protein 254                | <b>0.0076</b>    | -0.2379           | 0.1219           | <b>-0.0074</b>    | 0.3517        | 60 ± 7     | 78 ± 10    | 76 ± 4     | 103 ± 35   |
| 202049_s_at | ZNF262 | zinc finger protein 262                | 0.0945           | <b>-0.0077</b>    | -0.0884          | 0.4896            | <b>0.0122</b> | 324 ± 22   | 282 ± 19   | 295 ± 13   | 418 ± 48   |
| 205917_at   | ZNF264 | zinc finger protein 264                | <b>0.0017</b>    | <b>-0.0477</b>    | 0.0676           | -0.2724           | <b>0.0475</b> | 490 ± 25   | 610 ± 59   | 647 ± 44   | 711 ± 80   |
| 209989_at   | ZNF268 | zinc finger protein 268                | <b>0.0017</b>    | <b>-0.0202</b>    | <b>0.0242</b>    | 0.2564            | 0.0568        | 131 ± 11   | 165 ± 44   | 211 ± 20   | 238 ± 32   |
| 204937_s_at | ZNF274 | zinc finger protein 274                | 0.3553           | <b>-0.0252</b>    | -0.2940          | -0.3504           | 0.1133        | 646 ± 41   | 660 ± 51   | 622 ± 44   | 782 ± 52   |
| 215887_at   | ZNF277 | zinc finger protein 277                | 0.2193           | <b>-0.0037</b>    | <b>-0.0292</b>   | 0.3394            | 0.0562        | 300 ± 24   | 275 ± 24   | 330 ± 19   | 424 ± 63   |
| 209494_s_at | ZNF278 | zinc finger protein 278                | <b>0.0149</b>    | <b>-0.0202</b>    | -0.0578          | 0.4757            | 0.1088        | 341 ± 21   | 358 ± 28   | 408 ± 26   | 465 ± 64   |
| 205383_s_at | ZNF288 | zinc finger protein 288                | <b>0.0042</b>    | <b>-0.0001</b>    | 0.2082           | 0.4022            | <b>0.0012</b> | 2784 ± 275 | 2856 ± 331 | 3603 ± 335 | 4851 ± 478 |
| 211975_at   | ZNF289 | zinc finger protein 289, ID1 regulated | <b>0.0399</b>    | -0.7879           | <b>0.0395</b>    | -0.4225           | 0.8304        | 1223 ± 88  | 1336 ± 130 | 1362 ± 117 | 1331 ± 150 |
| 209538_at   | ZNF32  | zinc finger protein 32                 | 0.6879           | <b>-0.0458</b>    | -0.2701          | <b>-0.0232</b>    | 0.4415        | 418 ± 23   | 462 ± 85   | 507 ± 34   | 548 ± 89   |
| 37860_at    | ZNF337 | zinc finger protein 337                | <b>0.0273</b>    | -0.1559           | -0.2914          | 0.2961            | 0.3364        | 563 ± 60   | 527 ± 65   | 632 ± 63   | 688 ± 69   |
| 214760_at   | ZNF337 | zinc finger protein 337                | <b>0.0389</b>    | -0.1521           | 0.1032           | -0.4603           | 0.1407        | 534 ± 46   | 642 ± 99   | 730 ± 56   | 700 ± 54   |
| 219379_x_at | ZNF358 | zinc finger protein 358                | <b>0.0004</b>    | <b>-0.0158</b>    | 0.3941           | 0.4081            | <b>0.0189</b> | 599 ± 27   | 678 ± 106  | 792 ± 62   | 1086 ± 185 |
| 206135_at   | ZNF387 | zinc finger protein 387                | <b>0.0436</b>    | -0.0790           | -0.2317          | -0.3400           | 0.3980        | 1062 ± 174 | 1094 ± 214 | 1379 ± 171 | 1416 ± 176 |
| 204139_x_at | ZNF42  | zinc finger protein 42                 | <b>0.0297</b>    | -0.0567           | -0.3626          | 0.1590            | <b>0.0134</b> | 615 ± 61   | 475 ± 19   | 545 ± 69   | 842 ± 109  |
| 40569_at    | ZNF42  | zinc finger protein 42                 | 0.0578           | <b>-0.0342</b>    | -0.1281          | <b>0.0257</b>     | <b>0.0091</b> | 1031 ± 75  | 785 ± 51   | 982 ± 61   | 1469 ± 230 |
| 210336_x_at | ZNF42  | zinc finger protein 42                 | <b>0.0104</b>    | <b>-0.0313</b>    | -0.3599          | -0.1998           | 0.0591        | 506 ± 44   | 458 ± 40   | 540 ± 59   | 736 ± 112  |
| 206695_x_at | ZNF43  | zinc finger protein 43                 | 0.2268           | <b>-0.0016</b>    | 0.1529           | <b>-0.0241</b>    | <b>0.0354</b> | 228 ± 15   | 264 ± 17   | 272 ± 17   | 310 ± 24   |
| 205089_at   | ZNF7   | zinc finger protein 7                  | 0.1458           | <b>-0.0103</b>    | -0.4816          | <b>-0.0204</b>    | 0.0576        | 174 ± 11   | 185 ± 12   | 191 ± 11   | 226 ± 18   |

| Probe set            | Name     | Description                                                 | NFT <sub>0</sub> | MMSE <sub>0</sub> | NFT <sub>1</sub> | MMSE <sub>1</sub> | ANOVA         | Control    | Incipient  | Moderate   | Severe      |
|----------------------|----------|-------------------------------------------------------------|------------------|-------------------|------------------|-------------------|---------------|------------|------------|------------|-------------|
| 221645_s_at          | ZNF83    | zinc finger protein 83                                      | 0.6657           | <b>-0.0478</b>    | 0.1521           | <b>-0.0133</b>    | 0.1220        | 283 ± 27   | 394 ± 44   | 432 ± 51   | 388 ± 54    |
| 204453_at            | ZNF84    | zinc finger protein 84                                      | <b>0.0001</b>    | <b>-0.0192</b>    | 0.2051           | <b>-0.0099</b>    | 0.0592        | 87 ± 10    | 96 ± 13    | 133 ± 19   | 138 ± 21    |
| 208472_at            | ZNFN1A4  | zinc finger protein, subfamily 1A, 4                        | <b>0.0335</b>    | -0.1455           | <b>0.0288</b>    | <b>-0.0211</b>    | 0.3678        | 102 ± 11   | 138 ± 26   | 121 ± 12   | 149 ± 31    |
| 218548_x_at          | ZSIG11   | putative secreted protein ZSIG11                            | 0.1565           | <b>-0.0164</b>    | 0.0785           | <b>-0.0459</b>    | 0.1738        | 177 ± 23   | 203 ± 17   | 207 ± 14   | 239 ± 20    |
| <b>Downregulated</b> |          |                                                             |                  |                   |                  |                   |               |            |            |            |             |
| 213666_at            | 37870    | septin 6                                                    | <b>-0.0230</b>   | <b>0.0374</b>     | -0.4156          | -0.3670           | <b>0.0001</b> | 886 ± 50   | 881 ± 73   | 635 ± 68   | 467 ± 42    |
| 200902_at            | 37879    | 15 kDa selenoprotein                                        | <b>-0.0197</b>   | 0.1069            | -0.3704          | -0.2702           | 0.2214        | 983 ± 59   | 990 ± 133  | 908 ± 119  | 712 ± 43    |
| 202169_s_at          | AASDHPPT | aminoadipate-semiald. dehydrog.-phosphopantetheinyl transf. | <b>-0.0065</b>   | <b>0.0039</b>     | 0.2772           | 0.3595            | 0.1701        | 3196 ± 304 | 2882 ± 381 | 2542 ± 245 | 2128 ± 449  |
| 209994_s_at          | ABCB1    | ATP-binding cassette, sub-family B , member 1               | -0.0567          | <b>0.0281</b>     | -0.4331          | -0.1299           | <b>0.0161</b> | 185 ± 13   | 141 ± 35   | 139 ± 24   | 63 ± 23     |
| 209993_at            | ABCB1    | ATP-binding cassette, sub-family B , member 1               | <b>-0.0352</b>   | <b>0.0005</b>     | <b>0.0166</b>    | 0.4480            | <b>0.0346</b> | 323 ± 17   | 306 ± 16   | 259 ± 18   | 217 ± 44    |
| 203196_at            | ABCC4    | ATP-binding cassette, sub-family C , member 4               | <b>-0.0395</b>   | -0.9594           | 0.1817           | <b>-0.0025</b>    | 0.7244        | 189 ± 19   | 208 ± 25   | 176 ± 23   | 168 ± 33    |
| 201873_s_at          | ABCE1    | ATP-binding cassette, sub-family E , member 1               | <b>-0.0048</b>   | <b>0.0115</b>     | <b>-0.0127</b>   | 0.1005            | <b>0.0000</b> | 516 ± 33   | 619 ± 27   | 557 ± 20   | 367 ± 19    |
| 221669_s_at          | ACAD8    | acyl-Coenzyme A dehydrogenase family, member 8              | <b>-0.0041</b>   | <b>0.0074</b>     | 0.2274           | -0.3825           | <b>0.0036</b> | 518 ± 21   | 404 ± 30   | 387 ± 28   | 376 ± 30    |
| 205412_at            | ACAT1    | acetyl-Coenzyme A acetyltransferase 1                       | <b>-0.0004</b>   | <b>0.0034</b>     | -0.1477          | 0.2538            | <b>0.0143</b> | 1199 ± 62  | 1204 ± 102 | 917 ± 106  | 853 ± 51    |
| 206690_at            | ACCN1    | amiloride-sensitive cation channel 1, neuronal              | -0.4668          | <b>0.0239</b>     | -0.2025          | -0.4684           | 0.1186        | 608 ± 62   | 484 ± 114  | 558 ± 135  | 269 ± 81    |
| 205378_s_at          | ACHE     | acetylcholinesterase                                        | -0.3873          | <b>0.0453</b>     | 0.4731           | 0.3744            | 0.2221        | 179 ± 20   | 163 ± 33   | 160 ± 25   | 104 ± 25    |
| 200793_s_at          | ACO2     | aconitase 2, mitochondrial                                  | <b>-0.0023</b>   | <b>0.0009</b>     | 0.3895           | 0.4085            | <b>0.0008</b> | 3157 ± 201 | 2668 ± 344 | 1879 ± 142 | 2027 ± 185  |
| 201630_s_at          | ACP1     | acid phosphatase 1, soluble                                 | <b>-0.0018</b>   | <b>0.0018</b>     | -0.3912          | -0.1132           | <b>0.0035</b> | 1359 ± 109 | 1259 ± 116 | 982 ± 43   | 886 ± 63    |
| 217827_s_at          | ACP33    | acid cluster protein 33                                     | <b>-0.0455</b>   | 0.2177            | -0.1581          | 0.0626            | 0.3864        | 1323 ± 71  | 1294 ± 50  | 1128 ± 74  | 1186 ± 144  |
| 206013_s_at          | ACTL6    | actin-like 6                                                | -0.0778          | <b>0.0372</b>     | -0.3814          | 0.4915            | 0.2907        | 205 ± 43   | 194 ± 62   | 119 ± 29   | 103 ± 44    |
| 208637_x_at          | ACTN1    | actinin, alpha 1                                            | -0.2078          | <b>0.0309</b>     | -0.1291          | <b>0.0461</b>     | <b>0.0405</b> | 903 ± 46   | 722 ± 42   | 770 ± 44   | 720 ± 63    |
| 200720_s_at          | ACTR1A   | ARP1 actin-related protein 1 homolog A, centractin alpha    | -0.0866          | <b>0.0210</b>     | 0.4297           | 0.2111            | 0.0647        | 573 ± 62   | 592 ± 47   | 581 ± 24   | 413 ± 24    |
| 202135_s_at          | ACTR1B   | ARP1 actin-related protein 1 homolog B, centractin beta     | <b>-0.0104</b>   | 0.4508            | <b>-0.0249</b>   | 0.2736            | 0.6529        | 967 ± 60   | 860 ± 83   | 886 ± 62   | 868 ± 73    |
| 200729_s_at          | ACTR2    | ARP2 actin-related protein 2 homolog                        | <b>-0.0195</b>   | <b>0.0277</b>     | -0.4331          | -0.1967           | <b>0.0019</b> | 881 ± 64   | 852 ± 132  | 641 ± 78   | 376 ± 56    |
| 200728_at            | ACTR2    | ARP2 actin-related protein 2 homolog                        | <b>-0.0005</b>   | <b>0.0137</b>     | 0.3870           | -0.1555           | 0.0807        | 1130 ± 100 | 1120 ± 245 | 892 ± 52   | 651 ± 46    |
| 200996_at            | ACTR3    | ARP3 actin-related protein 3 homolog                        | <b>-0.0455</b>   | 0.2131            | -0.3638          | -0.2805           | 0.3749        | 1348 ± 130 | 1232 ± 245 | 941 ± 88   | 1004 ± 259  |
| 206833_s_at          | ACYP2    | acylphosphatase 2, muscle type                              | <b>-0.0180</b>   | 0.1385            | -0.1283          | 0.4894            | 0.0966        | 971 ± 52   | 869 ± 47   | 769 ± 76   | 806 ± 48    |
| 218147_s_at          | AD-017   | glycosyltransferase AD-017                                  | <b>-0.0327</b>   | <b>0.0463</b>     | -0.3830          | 0.3037            | <b>0.0131</b> | 282 ± 21   | 295 ± 27   | 224 ± 17   | 194 ± 21    |
| 202266_at            | AD022    | TRAF and TNF receptor-associated protein                    | <b>-0.0451</b>   | <b>0.0326</b>     | 0.4807           | -0.4890           | 0.2624        | 1243 ± 122 | 1185 ± 75  | 1053 ± 93  | 957 ± 129   |
| 205746_s_at          | ADAM17   | a disintegrin and metalloproteinase domain 17               | <b>-0.0138</b>   | <b>0.0227</b>     | -0.4412          | -0.3215           | <b>0.0264</b> | 139 ± 14   | 184 ± 20   | 127 ± 18   | 96 ± 21     |
| 206046_at            | ADAM23   | a disintegrin and metalloproteinase domain 23               | -0.2007          | <b>0.0081</b>     | 0.2818           | 0.2990            | <b>0.0266</b> | 501 ± 35   | 473 ± 51   | 350 ± 21   | 369 ± 53    |
| 213219_at            | ADCY2    | adenylate cyclase 2                                         | -0.0656          | <b>0.0064</b>     | 0.0836           | 0.1310            | 0.0996        | 763 ± 85   | 785 ± 147  | 608 ± 90   | 441 ± 86    |
| 204497_at            | ADCY9    | adenylate cyclase 9                                         | <b>-0.0439</b>   | 0.0849            | 0.4070           | 0.2887            | 0.3834        | 884 ± 86   | 795 ± 76   | 697 ± 46   | 699 ± 137   |
| 208848_at            | ADH5     | alcohol dehydrogenase 5 , chi polypeptide                   | <b>-0.0002</b>   | <b>0.0182</b>     | -0.4369          | 0.1306            | 0.0743        | 1093 ± 93  | 1035 ± 124 | 820 ± 88   | 759 ± 94    |
| 204120_s_at          | ADK      | adenosine kinase                                            | <b>-0.0269</b>   | 0.2225            | -0.2766          | -0.3496           | 0.3324        | 160 ± 15   | 151 ± 8    | 168 ± 18   | 124 ± 23    |
| 205891_at            | ADORA2B  | adenosine A2b receptor                                      | <b>-0.0083</b>   | <b>0.0066</b>     | -0.2831          | 0.4497            | <b>0.0179</b> | 423 ± 11   | 396 ± 42   | 288 ± 20   | 305 ± 49    |
| 208644_at            | ADPRT    | ADP-ribosyltransferase polymerase)                          | <b>-0.0020</b>   | 0.1298            | <b>-0.0196</b>   | -0.4561           | 0.1858        | 1196 ± 67  | 1111 ± 70  | 1092 ± 77  | 970 ± 60    |
| 217729_s_at          | AES      | amino-terminal enhancer of split                            | -0.0963          | <b>0.0162</b>     | -0.3097          | 0.2767            | <b>0.0310</b> | 1037 ± 85  | 944 ± 63   | 1011 ± 82  | 722 ± 58    |
| 211071_s_at          | AF1Q     | ALL1-fused gene from chromosome 1q                          | <b>-0.0076</b>   | <b>0.0058</b>     | -0.2779          | 0.3669            | 0.0888        | 8001 ± 717 | 7003 ± 903 | 5924 ± 594 | 5054 ± 1146 |
| 219308_s_at          | AK5      | adenylate kinase 5                                          | <b>-0.0069</b>   | <b>0.0166</b>     | -0.3194          | 0.3453            | <b>0.0220</b> | 6484 ± 741 | 4905 ± 604 | 4274 ± 512 | 3541 ± 708  |



| Probe set   | Name    | Description                                                  | NFT <sub>0</sub> | MMSE <sub>0</sub> | NFT <sub>1</sub> | MMSE <sub>1</sub> | ANOVA         | Control    | Incipient   | Moderate    | Severe     |
|-------------|---------|--------------------------------------------------------------|------------------|-------------------|------------------|-------------------|---------------|------------|-------------|-------------|------------|
| 203156_at   | AKAP11  | A kinase anchor protein 11                                   | <b>-0.0012</b>   | <b>0.0001</b>     | 0.2438           | 0.0977            | 0.0794        | 3946 ± 346 | 3433 ± 587  | 2904 ± 249  | 2523 ± 392 |
| 210517_s_at | AKAP12  | A kinase anchor protein 12                                   | <b>-0.0186</b>   | <b>0.0063</b>     | <b>0.0503</b>    | -0.3574           | <b>0.0003</b> | 1105 ± 80  | 1081 ± 61   | 989 ± 100   | 596 ± 48   |
| 202759_s_at | AKAP2   | A kinase anchor protein 2                                    | <b>-0.0251</b>   | 0.0691            | <b>-0.0136</b>   | -0.3125           | 0.2230        | 1219 ± 79  | 1193 ± 83   | 1141 ± 118  | 928 ± 129  |
| 201425_at   | ALDH2   | aldehyde dehydrogenase 2 family                              | -0.0615          | <b>0.0161</b>     | <b>-0.0228</b>   | 0.0997            | <b>0.0039</b> | 6579 ± 227 | 5151 ± 261  | 5117 ± 384  | 4890 ± 401 |
| 203608_at   | ALDH5A1 | aldehyde dehydrogenase 5 family, member A1                   | -0.0816          | <b>0.0336</b>     | -0.3654          | 0.1285            | 0.1291        | 1539 ± 160 | 1230 ± 124  | 1319 ± 141  | 1025 ± 162 |
| 202022_at   | ALDOC   | aldolase C, fructose-bisphosphate                            | <b>-0.0254</b>   | <b>0.0221</b>     | -0.3021          | -0.2986           | <b>0.0162</b> | 9235 ± 722 | 1254 ± 1578 | 1118 ± 1163 | 5884 ± 497 |
| 218694_at   | ALEX1   | ALEX1 protein                                                | <b>-0.0168</b>   | <b>0.0163</b>     | -0.3278          | 0.4239            | 0.0691        | 1010 ± 96  | 941 ± 101   | 740 ± 60    | 701 ± 113  |
| 204174_at   | ALOX5AP | arachidonate 5-lipoxygenase-activating protein               | <b>-0.0089</b>   | 0.5289            | <b>-0.0055</b>   | 0.3400            | 0.2616        | 771 ± 118  | 622 ± 75    | 475 ± 73    | 661 ± 144  |
| 202203_s_at | AMFR    | autocrine motility factor receptor                           | <b>-0.0407</b>   | <b>0.0203</b>     | -0.0615          | 0.1140            | 0.0561        | 727 ± 104  | 657 ± 169   | 466 ± 91    | 300 ± 78   |
| 202811_at   | AMSH    | associated molecule with the SH3 domain of STAM              | <b>-0.0444</b>   | 0.9850            | 0.3239           | 0.1350            | 0.6043        | 892 ± 36   | 871 ± 37    | 789 ± 57    | 876 ± 96   |
| 208498_s_at | AMY1A   | amylase, alpha 1A; salivary                                  | <b>-0.0232</b>   | 0.0582            | -0.4186          | -0.3594           | 0.2628        | 319 ± 32   | 348 ± 27    | 284 ± 23    | 262 ± 39   |
| 204727_at   | AND-1   | AND-1 protein                                                | -0.1046          | <b>0.0354</b>     | -0.1270          | 0.0735            | 0.2635        | 56 ± 8     | 42 ± 6      | 46 ± 11     | 32 ± 5     |
| 209442_x_at | ANK3    | ankyrin 3, node of Ranvier                                   | -0.0607          | <b>0.0314</b>     | <b>0.0408</b>    | 0.2900            | 0.0931        | 1076 ± 39  | 1167 ± 82   | 1011 ± 55   | 939 ± 60   |
| 209860_s_at | ANXA7   | annexin A7                                                   | <b>-0.0265</b>   | 0.1204            | -0.3583          | -0.1762           | 0.2317        | 1257 ± 99  | 1232 ± 145  | 1024 ± 58   | 1010 ± 109 |
| 200615_s_at | AP2B1   | adaptor-related protein complex 2, beta 1 subunit            | <b>-0.0012</b>   | <b>0.0001</b>     | -0.4392          | <b>0.0096</b>     | <b>0.0413</b> | 916 ± 42   | 763 ± 87    | 716 ± 49    | 677 ± 71   |
| 200613_at   | AP2M1   | adaptor-related protein complex 2, mu 1 subunit              | -0.1009          | <b>0.0229</b>     | -0.4039          | -0.1683           | <b>0.0251</b> | 2336 ± 116 | 2446 ± 364  | 2352 ± 185  | 1423 ± 209 |
| 208074_s_at | AP2S1   | adaptor-related protein complex 2, sigma 1 subunit           | -0.0822          | <b>0.0310</b>     | -0.2196          | 0.4482            | 0.2109        | 1045 ± 91  | 992 ± 164   | 929 ± 37    | 724 ± 118  |
| 205678_at   | AP3B2   | adaptor-related protein complex 3, beta 2 subunit            | -0.0587          | <b>0.0056</b>     | 0.3870           | 0.1584            | 0.0674        | 1011 ± 132 | 778 ± 40    | 727 ± 87    | 634 ± 87   |
| 202442_at   | AP3S1   | adaptor-related protein complex 3, sigma 1 subunit           | <b>-0.0078</b>   | <b>0.0026</b>     | 0.4166           | 0.3811            | <b>0.0011</b> | 4853 ± 235 | 4193 ± 84   | 3928 ± 179  | 3611 ± 226 |
| 210277_at   | AP4S1   | adaptor-related protein complex 4, sigma 1 subunit           | <b>-0.0204</b>   | 0.1534            | -0.1719          | -0.3086           | 0.2052        | 126 ± 12   | 100 ± 17    | 110 ± 13    | 82 ± 17    |
| 203008_x_at | APACD   | ATP binding protein associated with cell differentiation     | <b>-0.0080</b>   | 0.1172            | -0.3643          | -0.3679           | 0.2875        | 674 ± 78   | 607 ± 98    | 470 ± 38    | 482 ± 111  |
| 211758_x_at | APACD   | ATP binding protein associated with cell differentiation     | <b>-0.0271</b>   | <b>0.0094</b>     | -0.3485          | 0.1203            | <b>0.0110</b> | 945 ± 98   | 781 ± 108   | 660 ± 60    | 513 ± 38   |
| 209871_s_at | APBA2   | amyloid beta precursor protein-binding, family A, member 2   | <b>-0.0111</b>   | <b>0.0003</b>     | -0.1928          | <b>0.0461</b>     | <b>0.0308</b> | 4088 ± 350 | 3329 ± 423  | 2735 ± 284  | 2915 ± 277 |
| 203527_s_at | APC     | adenomatous polyposis coli                                   | <b>-0.0070</b>   | <b>0.0077</b>     | -0.4214          | -0.3631           | <b>0.0021</b> | 637 ± 20   | 511 ± 73    | 472 ± 57    | 241 ± 95   |
| 210027_s_at | APEX    | APEX nuclease                                                | <b>-0.0207</b>   | <b>0.0185</b>     | -0.2345          | 0.4053            | <b>0.0246</b> | 1413 ± 86  | 1505 ± 114  | 1246 ± 79   | 1100 ± 53  |
| 205543_at   | APG-1   | heat shock protein                                           | <b>-0.0062</b>   | <b>0.0126</b>     | -0.0603          | 0.3192            | <b>0.0155</b> | 285 ± 25   | 223 ± 27    | 207 ± 21    | 164 ± 19   |
| 214875_x_at | APLP2   | amyloid beta precursor-like protein 2                        | <b>-0.0508</b>   | <b>0.0339</b>     | 0.4931           | 0.2839            | 0.0861        | 436 ± 51   | 390 ± 53    | 275 ± 43    | 320 ± 38   |
| 208703_s_at | APLP2   | amyloid beta precursor-like protein 2                        | <b>-0.0511</b>   | <b>0.0390</b>     | -0.2066          | -0.2359           | 0.0661        | 2060 ± 288 | 1965 ± 317  | 1960 ± 155  | 1076 ± 311 |
| 208704_x_at | APLP2   | amyloid beta precursor-like protein 2                        | <b>-0.0322</b>   | <b>0.0414</b>     | -0.2457          | -0.3323           | <b>0.0334</b> | 4958 ± 387 | 4375 ± 267  | 4473 ± 260  | 3468 ± 387 |
| 208248_x_at | APLP2   | amyloid beta precursor-like protein 2                        | <b>-0.0075</b>   | <b>0.0020</b>     | <b>-0.0526</b>   | 0.0889            | <b>0.0111</b> | 5472 ± 321 | 5486 ± 288  | 5755 ± 212  | 4263 ± 377 |
| 214953_s_at | APP     | amyloid beta precursor protein                               | <b>-0.0484</b>   | 0.5727            | -0.1783          | 0.4867            | 0.2791        | 4578 ± 289 | 4597 ± 499  | 5130 ± 577  | 3717 ± 578 |
| 202268_s_at | APPBP1  | amyloid beta precursor protein binding protein 1, 59kDa      | <b>-0.0159</b>   | 0.5330            | -0.1010          | -0.4897           | 0.6402        | 937 ± 46   | 840 ± 69    | 875 ± 58    | 816 ± 113  |
| 201176_s_at | ARCN1   | archain 1                                                    | <b>-0.0338</b>   | 0.0587            | <b>-0.0229</b>   | -0.4217           | 0.1365        | 1095 ± 51  | 1044 ± 110  | 948 ± 44    | 814 ± 130  |
| 200065_s_at | ARF1    | ADP-ribosylation factor 1                                    | <b>-0.0030</b>   | <b>0.0003</b>     | -0.3908          | <b>0.0486</b>     | <b>0.0080</b> | 5134 ± 329 | 4211 ± 323  | 4202 ± 316  | 3330 ± 377 |
| 200734_s_at | ARF3    | ADP-ribosylation factor 3                                    | <b>-0.0363</b>   | <b>0.0379</b>     | -0.2526          | 0.2591            | <b>0.0072</b> | 6169 ± 535 | 5151 ± 427  | 4503 ± 419  | 3636 ± 524 |
| 200011_s_at | ARF3    | ADP-ribosylation factor 3                                    | <b>-0.0040</b>   | <b>0.0032</b>     | -0.3809          | 0.4246            | 0.2742        | 4470 ± 387 | 4035 ± 478  | 3904 ± 387  | 3305 ± 405 |
| 201097_s_at | ARF4    | ADP-ribosylation factor 4                                    | <b>-0.0249</b>   | 0.0967            | 0.4321           | -0.3210           | 0.1529        | 2597 ± 175 | 2907 ± 90   | 2232 ± 76   | 2277 ± 361 |
| 201526_at   | ARF5    | ADP-ribosylation factor 5                                    | -0.1202          | <b>0.0013</b>     | 0.3219           | 0.2452            | <b>0.0238</b> | 1067 ± 97  | 1088 ± 100  | 965 ± 92    | 675 ± 90   |
| 218098_at   | ARFGEF2 | ADP-ribosylation factor guanine nucleotide-exchange factor 2 | <b>-0.0464</b>   | <b>0.0005</b>     | -0.3888          | 0.3052            | <b>0.0224</b> | 1113 ± 71  | 1204 ± 65   | 991 ± 77    | 808 ± 109  |

| Probe set   | Name     | Description                                                               | NFT <sub>0</sub> | MMSE <sub>0</sub> | NFT <sub>1</sub> | MMSE <sub>1</sub> | ANOVA         | Control     | Incipient   | Moderate    | Severe     |
|-------------|----------|---------------------------------------------------------------------------|------------------|-------------------|------------------|-------------------|---------------|-------------|-------------|-------------|------------|
| 204288_s_at | ARGBP2   | Arg/Abl-interacting protein ArgBP2                                        | <b>-0.0372</b>   | <b>0.0460</b>     | 0.4211           | 0.2355            | <b>0.0037</b> | 666 ± 64    | 588 ± 45    | 607 ± 72    | 330 ± 41   |
| 218501_at   | ARHGEF3  | Rho guanine nucleotide exchange factor 3                                  | <b>-0.0087</b>   | <b>0.0047</b>     | -0.2544          | 0.0844            | 0.1657        | 1997 ± 266  | 1700 ± 177  | 1353 ± 184  | 1370 ± 275 |
| 211891_s_at | ARHGEF4  | Rho guanine nucleotide exchange factor 4                                  | -0.2452          | <b>0.0486</b>     | 0.3604           | <b>0.0476</b>     | 0.5472        | 461 ± 58    | 421 ± 40    | 406 ± 45    | 364 ± 33   |
| 203264_s_at | ARHGEF9  | Cdc42 guanine nucleotide exchange factor 9                                | <b>-0.0080</b>   | <b>0.0398</b>     | -0.0682          | 0.1120            | 0.0903        | 2514 ± 265  | 2053 ± 361  | 1782 ± 211  | 1483 ± 325 |
| 215506_s_at | ARHI     | ras homolog gene family, member I                                         | -0.0710          | <b>0.0287</b>     | -0.0997          | 0.4589            | 0.1225        | 154 ± 18    | 132 ± 8     | 115 ± 21    | 102 ± 10   |
| 201228_s_at | ARIH2    | ariadne homolog 2                                                         | <b>-0.0154</b>   | 0.1633            | 0.1764           | -0.3651           | 0.0896        | 166 ± 13    | 196 ± 23    | 135 ± 8     | 144 ± 20   |
| 201659_s_at | ARL1     | ADP-ribosylation factor-like 1                                            | <b>-0.0294</b>   | <b>0.0387</b>     | -0.2117          | 0.2681            | <b>0.0280</b> | 361 ± 21    | 309 ± 31    | 251 ± 19    | 278 ± 31   |
| 202206_at   | ARL7     | ADP-ribosylation factor-like 7                                            | <b>-0.0232</b>   | <b>0.0060</b>     | 0.4689           | 0.2053            | 0.0985        | 451 ± 60    | 365 ± 53    | 291 ± 41    | 305 ± 33   |
| 202986_at   | ARNT2    | aryl-hydrocarbon receptor nuclear translocator 2                          | <b>-0.0216</b>   | <b>0.0180</b>     | 0.1596           | -0.4914           | <b>0.0023</b> | 2960 ± 138  | 2340 ± 220  | 2708 ± 198  | 1963 ± 93  |
| 218868_at   | ARP3BETA | actin-related protein 3-beta                                              | -0.1288          | <b>0.0209</b>     | 0.3049           | 0.1522            | 0.0718        | 782 ± 141   | 520 ± 69    | 466 ± 47    | 452 ± 80   |
| 200950_at   | ARPC1A   | actin related protein 2/3 complex, subunit 1A, 41kDa                      | <b>-0.0223</b>   | 0.0982            | 0.4727           | 0.2339            | 0.3586        | 1375 ± 147  | 1270 ± 182  | 992 ± 69    | 1047 ± 279 |
| 208679_s_at | ARPC2    | actin related protein 2/3 complex, subunit 2, 34kDa                       | <b>-0.0318</b>   | 0.0553            | -0.4284          | 0.3142            | 0.2933        | 1696 ± 185  | 1625 ± 267  | 1311 ± 101  | 1220 ± 236 |
| 213513_x_at | ARPC2    | actin related protein 2/3 complex, subunit 2, 34kDa                       | <b>-0.0425</b>   | <b>0.0321</b>     | 0.3714           | -0.2868           | 0.0922        | 3327 ± 350  | 3014 ± 187  | 2846 ± 138  | 2398 ± 213 |
| 208736_at   | ARPC3    | actin related protein 2/3 complex, subunit 3, 21kDa                       | <b>-0.0400</b>   | <b>0.0210</b>     | -0.4489          | 0.4450            | 0.1092        | 1115 ± 100  | 1082 ± 137  | 920 ± 73    | 760 ± 124  |
| 211963_s_at | ARPC5    | actin related protein 2/3 complex, subunit 5, 16kDa                       | <b>-0.0202</b>   | 0.6260            | 0.1618           | 0.2179            | 0.7378        | 1601 ± 65   | 1695 ± 82   | 1526 ± 141  | 1562 ± 129 |
| 221482_s_at | ARPP-19  | cyclic AMP phosphoprotein, 19 kD                                          | -0.0612          | <b>0.0090</b>     | -0.4479          | 0.4854            | <b>0.0512</b> | 2398 ± 315  | 2248 ± 244  | 2087 ± 163  | 1459 ± 110 |
| 217776_at   | ARSDR1   | androgen-regulated short-chain dehydrogenase/reductase 1                  | <b>-0.0167</b>   | 0.0941            | 0.4113           | -0.4799           | 0.3016        | 1893 ± 177  | 1817 ± 207  | 1558 ± 136  | 1426 ± 256 |
| 204742_s_at | AS3      | androgen-induced prostate proliferative shutoff associated                | <b>-0.0354</b>   | <b>0.0134</b>     | 0.3775           | -0.3333           | 0.1775        | 694 ± 91    | 643 ± 112   | 531 ± 48    | 444 ± 74   |
| 213902_at   | ASAH1    | N-acylsphingosine amidohydrolase 1                                        | -0.0909          | <b>0.0061</b>     | 0.2001           | 0.1464            | <b>0.0434</b> | 1133 ± 135  | 919 ± 40    | 818 ± 73    | 703 ± 120  |
| 209517_s_at | ASH2L    | ash2 -like                                                                | <b>-0.0055</b>   | 0.0721            | 0.3679           | 0.4077            | 0.0913        | 1287 ± 88   | 1330 ± 58   | 1041 ± 96   | 1141 ± 91  |
| 36554_at    | ASMTL    | acetylserotonin O-methyltransferase-like                                  | <b>-0.0021</b>   | <b>0.0017</b>     | <b>-0.0265</b>   | 0.2221            | <b>0.0458</b> | 275 ± 22    | 276 ± 36    | 249 ± 25    | 172 ± 17   |
| 202024_at   | ASNA1    | arsA arsenite transporter, ATP-binding, homolog 1                         | <b>-0.0422</b>   | 0.0578            | -0.2595          | -0.1976           | 0.1275        | 638 ± 64    | 674 ± 83    | 628 ± 45    | 445 ± 82   |
| 209135_at   | ASPH     | aspartate beta-hydroxylase                                                | <b>-0.0213</b>   | 0.2701            | -0.3514          | -0.1039           | 0.3476        | 929 ± 80    | 938 ± 80    | 966 ± 103   | 747 ± 92   |
| 210896_s_at | ASPH     | aspartate beta-hydroxylase                                                | <b>-0.0027</b>   | <b>0.0014</b>     | -0.3201          | 0.3528            | <b>0.0005</b> | 561 ± 45    | 350 ± 40    | 374 ± 51    | 246 ± 20   |
| 213197_at   | ASTN     | astrotactin                                                               | <b>-0.0197</b>   | <b>0.0488</b>     | <b>-0.0069</b>   | 0.1614            | <b>0.0133</b> | 1692 ± 157  | 1448 ± 203  | 1238 ± 168  | 888 ± 118  |
| 208758_at   | ATIC     | IMP cyclohydrolase                                                        | <b>-0.0177</b>   | 0.2268            | <b>-0.0028</b>   | 0.1027            | <b>0.0220</b> | 1080 ± 27   | 987 ± 65    | 748 ± 99    | 981 ± 87   |
| 203295_s_at | ATP1A2   | ATPase, Na <sup>+</sup> /K <sup>+</sup> transporting, alpha 2 polypeptide | -0.4108          | <b>0.0472</b>     | <b>0.0293</b>    | -0.0678           | 0.0707        | 3247 ± 179  | 3350 ± 295  | 3451 ± 224  | 2494 ± 274 |
| 201243_s_at | ATP1B1   | ATPase, Na <sup>+</sup> /K <sup>+</sup> transporting, beta 1 polypeptide  | <b>-0.0223</b>   | 0.2349            | -0.2176          | -0.2624           | 0.4412        | 10569 ± 551 | 9972 ± 1011 | 10155 ± 496 | 8878 ± 930 |
| 209186_at   | ATP2A2   | ATPase, Ca <sup>++</sup> transporting, cardiac muscle, slow twitch 2      | <b>-0.0086</b>   | <b>0.0040</b>     | 0.3046           | 0.4770            | <b>0.0508</b> | 3230 ± 62   | 2685 ± 287  | 2553 ± 162  | 2404 ± 294 |
| 215716_s_at | ATP2B1   | ATPase, Ca <sup>++</sup> transporting, plasma membrane 1                  | <b>-0.0241</b>   | <b>0.0005</b>     | 0.2534           | 0.2047            | <b>0.0342</b> | 1788 ± 270  | 1625 ± 233  | 1154 ± 91   | 893 ± 232  |
| 216120_s_at | ATP2B2   | ATPase, Ca <sup>++</sup> transporting, plasma membrane 2                  | -0.1357          | <b>0.0147</b>     | -0.3664          | -0.3966           | <b>0.0083</b> | 268 ± 25    | 231 ± 25    | 267 ± 20    | 159 ± 21   |
| 204685_s_at | ATP2B2   | ATPase, Ca <sup>++</sup> transporting, plasma membrane 2                  | <b>-0.0066</b>   | <b>0.0022</b>     | -0.3724          | 0.4763            | <b>0.0151</b> | 2397 ± 264  | 2403 ± 254  | 2013 ± 304  | 1201 ± 48  |
| 211137_s_at | ATP2C1   | ATPase, Ca <sup>++</sup> transporting, type 2C, member 1                  | <b>-0.0489</b>   | 0.2059            | <b>0.0257</b>    | -0.1215           | 0.2042        | 655 ± 48    | 733 ± 41    | 629 ± 32    | 576 ± 69   |
| 213738_s_at | ATP5A1   | ATP synthase, mitochondrial F1 alpha 1                                    | <b>-0.0098</b>   | <b>0.0276</b>     | -0.2752          | 0.3967            | <b>0.0135</b> | 4827 ± 452  | 4315 ± 520  | 3405 ± 479  | 2586 ± 329 |
| 201322_at   | ATP5B    | ATP synthase, mitochondrial F1 beta                                       | <b>-0.0012</b>   | <b>0.0016</b>     | 0.4908           | 0.3063            | 0.0944        | 3478 ± 372  | 3040 ± 478  | 2251 ± 281  | 2151 ± 572 |
| 213366_x_at | ATP5C1   | ATP synthase, mitochondrial F1 gamma 1                                    | <b>-0.0009</b>   | <b>0.0018</b>     | -0.3409          | 0.2362            | <b>0.0109</b> | 3990 ± 407  | 3464 ± 431  | 2580 ± 224  | 2253 ± 431 |
| 205711_x_at | ATP5C1   | ATP synthase, mitochondrial F1 gamma 1                                    | <b>-0.0018</b>   | <b>0.0071</b>     | 0.3667           | 0.3274            | <b>0.0066</b> | 3292 ± 302  | 2777 ± 293  | 2034 ± 171  | 1969 ± 369 |
| 208870_x_at | ATP5C1   | ATP synthase, mitochondrial F1 gamma 1                                    | <b>-0.0235</b>   | <b>0.0145</b>     | 0.2506           | -0.2572           | <b>0.0284</b> | 4060 ± 484  | 3868 ± 438  | 2572 ± 192  | 2741 ± 450 |
| 217801_at   | ATP5E    | ATP synthase, mitochondrial F1 epsilon                                    | <b>-0.0084</b>   | <b>0.0391</b>     | -0.4077          | 0.1998            | <b>0.0327</b> | 5191 ± 250  | 4834 ± 452  | 4800 ± 274  | 3806 ± 307 |

| Probe set   | Name     | Description                                               | NFT <sub>0</sub> | MMSE <sub>0</sub> | NFT <sub>1</sub> | MMSE <sub>1</sub> | ANOVA         | Control     | Incipient   | Moderate    | Severe     |
|-------------|----------|-----------------------------------------------------------|------------------|-------------------|------------------|-------------------|---------------|-------------|-------------|-------------|------------|
| 211755_s_at | ATP5F1   | ATP synthase, mitochondrial F0 b 1                        | <b>-0.0175</b>   | <b>0.0355</b>     | 0.1719           | -0.4570           | 0.0996        | 3548 ± 347  | 2974 ± 389  | 2407 ± 251  | 2435 ± 482 |
| 207507_s_at | ATP5G3   | ATP synthase, mitochondrial F0 c 3                        | <b>-0.0236</b>   | 0.0938            | -0.2152          | -0.4837           | 0.2957        | 1998 ± 237  | 1706 ± 304  | 1337 ± 216  | 1335 ± 376 |
| 207508_at   | ATP5G3   | ATP synthase, mitochondrial F0 c 3                        | <b>-0.0133</b>   | <b>0.0201</b>     | -0.4996          | 0.2836            | 0.0730        | 2559 ± 328  | 2249 ± 262  | 1626 ± 211  | 1695 ± 306 |
| 210149_s_at | ATP5H    | ATP synthase, mitochondrial F0 d                          | <b>-0.0097</b>   | <b>0.0254</b>     | -0.1686          | 0.2712            | 0.0551        | 4108 ± 577  | 3508 ± 548  | 2431 ± 258  | 2522 ± 487 |
| 202325_s_at | ATP5J    | ATP synthase, mitochondrial F0 F6                         | <b>-0.0131</b>   | <b>0.0098</b>     | -0.2612          | 0.3466            | 0.0874        | 2953 ± 210  | 2575 ± 296  | 2501 ± 93   | 1970 ± 389 |
| 202961_s_at | ATP5J2   | ATP synthase, mitochondrial F0 f 2                        | <b>-0.0035</b>   | <b>0.0049</b>     | -0.3091          | -0.4530           | 0.0980        | 2930 ± 213  | 2729 ± 380  | 2246 ± 277  | 1895 ± 382 |
| 210453_x_at | ATP5L    | ATP synthase, mitochondrial F0 g                          | <b>-0.0291</b>   | <b>0.0504</b>     | -0.4626          | 0.2114            | 0.1852        | 2666 ± 259  | 2430 ± 290  | 1864 ± 239  | 1946 ± 417 |
| 208746_x_at | ATP5L    | ATP synthase, mitochondrial F0 g                          | <b>-0.0443</b>   | 0.0778            | -0.3199          | 0.1824            | 0.1672        | 2449 ± 251  | 2149 ± 323  | 1618 ± 157  | 1817 ± 386 |
| 208745_at   | ATP5L    | ATP synthase, mitochondrial F0 g                          | <b>-0.0183</b>   | <b>0.0054</b>     | -0.2001          | 0.3686            | <b>0.0379</b> | 1204 ± 87   | 1193 ± 157  | 903 ± 128   | 743 ± 132  |
| 207573_x_at | ATP5L    | ATP synthase, mitochondrial F0 g                          | <b>-0.0049</b>   | <b>0.0097</b>     | -0.3982          | 0.3684            | <b>0.0470</b> | 1768 ± 123  | 1686 ± 274  | 1364 ± 140  | 1045 ± 152 |
| 200818_at   | ATP5O    | ATP synthase, mitochondrial F1 O                          | <b>-0.0224</b>   | <b>0.0239</b>     | 0.4487           | 0.1979            | 0.0717        | 3259 ± 265  | 2919 ± 281  | 2509 ± 230  | 2123 ± 448 |
| 207809_s_at | ATP6IP1  | ATPase, H+ transporting, lysosomal interacting protein 1  | <b>-0.0538</b>   | <b>0.0238</b>     | -0.2033          | 0.0852            | 0.0640        | 2289 ± 324  | 1795 ± 272  | 1395 ± 177  | 1469 ± 126 |
| 201443_s_at | ATP6IP2  | ATPase, H+ transporting, lysosomal interacting protein 2  | <b>-0.0097</b>   | 0.0843            | -0.4499          | 0.3486            | 0.2785        | 3605 ± 404  | 3098 ± 467  | 2734 ± 269  | 2553 ± 497 |
| 201444_s_at | ATP6IP2  | ATPase, H+ transporting, lysosomal interacting protein 2  | <b>-0.0044</b>   | <b>0.0025</b>     | -0.1328          | 0.1932            | 0.0732        | 1106 ± 231  | 873 ± 154   | 545 ± 80    | 556 ± 161  |
| 36994_at    | ATP6V0C  | ATPase, H+ transporting, lysosomal 16kDa, V0 subunit c    | <b>-0.0333</b>   | 0.1039            | -0.2408          | 0.4923            | 0.2577        | 6835 ± 564  | 6391 ± 715  | 5204 ± 323  | 5395 ± 965 |
| 201971_s_at | ATP6V1A1 | ATPase, lysosomal V1 A 1                                  | <b>-0.0446</b>   | 0.0933            | -0.2416          | -0.4302           | 0.1629        | 168 ± 38    | 162 ± 43    | 73 ± 14     | 113 ± 33   |
| 202872_at   | ATP6V1C1 | ATPase, lysosomal V1 C 1                                  | -0.1005          | <b>0.0013</b>     | -0.3820          | -0.3411           | <b>0.0143</b> | 850 ± 66    | 858 ± 20    | 712 ± 43    | 595 ± 80   |
| 208898_at   | ATP6V1D  | ATPase, H+ transporting, lysosomal 34kDa, V1 subunit D    | <b>-0.0167</b>   | <b>0.0052</b>     | -0.1532          | 0.0754            | <b>0.0036</b> | 3577 ± 314  | 2604 ± 363  | 2232 ± 250  | 1974 ± 279 |
| 208899_x_at | ATP6V1D  | ATPase, H+ transporting, lysosomal 34kDa, V1 subunit D    | <b>-0.0056</b>   | <b>0.0016</b>     | -0.4344          | 0.1406            | <b>0.0094</b> | 1449 ± 142  | 1160 ± 177  | 813 ± 81    | 920 ± 133  |
| 208678_at   | ATP6V1E1 | ATPase, lysosomal V1 E 1                                  | <b>-0.0392</b>   | <b>0.0232</b>     | -0.1981          | -0.2157           | <b>0.0220</b> | 3167 ± 409  | 2667 ± 438  | 2000 ± 163  | 1677 ± 307 |
| 201527_at   | ATP6V1F  | ATPase, H+ transporting, lysosomal 14kDa, V1 subunit F    | <b>-0.0079</b>   | <b>0.0009</b>     | 0.4995           | 0.2629            | 0.0629        | 2988 ± 209  | 3036 ± 347  | 2711 ± 260  | 2007 ± 314 |
| 214762_at   | ATP6V1G2 | ATPase, lysosomal V1 G 2                                  | <b>-0.0067</b>   | <b>0.0020</b>     | -0.4839          | 0.2505            | <b>0.0068</b> | 3258 ± 540  | 2582 ± 468  | 1551 ± 245  | 1192 ± 219 |
| 221504_s_at | ATP6V1H  | ATPase, H+ transporting, lysosomal 50/57kDa, V1 subunit H | <b>-0.0002</b>   | <b>0.0003</b>     | -0.0948          | 0.1710            | <b>0.0289</b> | 2552 ± 336  | 2233 ± 475  | 1589 ± 185  | 1170 ± 305 |
| 219659_at   | ATP8A2   | ATPase, aminophospholipid transporter-like, I 8A 2        | -0.0779          | <b>0.0336</b>     | 0.4087           | -0.3513           | 0.1941        | 842 ± 106   | 768 ± 108   | 641 ± 74    | 571 ± 73   |
| 209903_s_at | ATR      | ataxia telangiectasia and Rad3 related                    | <b>-0.0244</b>   | 0.0957            | -0.2102          | 0.3627            | 0.1287        | 917 ± 77    | 786 ± 99    | 700 ± 28    | 701 ± 68   |
| 212517_at   | ATRN     | atractin                                                  | <b>-0.0373</b>   | <b>0.0235</b>     | -0.1717          | 0.1017            | <b>0.0024</b> | 1123 ± 41   | 1052 ± 69   | 901 ± 46    | 764 ± 93   |
| 208861_s_at | ATRX     | alpha thalassemia/mental retardation syndrome X-linked    | <b>-0.0206</b>   | 0.1848            | -0.3421          | -0.1373           | 0.4447        | 3094 ± 118  | 2988 ± 217  | 2946 ± 139  | 2681 ± 240 |
| 205052_at   | AUH      | AU RNA binding protein/enoyl-Coenzyme A hydratase         | <b>-0.0069</b>   | 0.0843            | -0.4071          | 0.3211            | 0.3314        | 858 ± 95    | 795 ± 72    | 733 ± 66    | 657 ± 70   |
| 202686_s_at | AXL      | AXL receptor tyrosine kinase                              | <b>-0.0344</b>   | 0.6565            | -0.1005          | -0.2097           | 0.7703        | 697 ± 68    | 735 ± 40    | 685 ± 76    | 630 ± 75   |
| 216231_s_at | B2M      | beta-2-microglobulin                                      | <b>-0.0485</b>   | 0.2655            | -0.1112          | -0.3310           | 0.4688        | 7997 ± 1038 | 5813 ± 1385 | 3780 ± 1676 | 5051 ± 961 |
| 217452_s_at | B3GALT2  | UDP-Gal:betaGlcNAc beta 1,3-galactosyltransferase 2       | -0.1651          | <b>0.0332</b>     | -0.4916          | -0.1578           | <b>0.0209</b> | 378 ± 48    | 395 ± 69    | 415 ± 39    | 189 ± 26   |
| 206233_at   | B4GALT6  | UDP-Gal:betaGlcNAc beta 1,4- galactosyltransferase 6      | -0.0624          | <b>0.0076</b>     | -0.2410          | 0.4600            | <b>0.0452</b> | 428 ± 60    | 342 ± 80    | 347 ± 45    | 181 ± 42   |
| 215728_s_at | BACH     | brain acyl-CoA hydrolase                                  | <b>-0.0326</b>   | 0.3261            | -0.4015          | -0.3714           | 0.1547        | 223 ± 32    | 212 ± 38    | 129 ± 18    | 173 ± 36   |
| 202985_s_at | BAG5     | BCL2-associated athanogene 5                              | <b>-0.0406</b>   | <b>0.0034</b>     | 0.4526           | <b>0.0301</b>     | 0.1562        | 1489 ± 81   | 1355 ± 86   | 1379 ± 26   | 1250 ± 75  |
| 204966_at   | BAI2     | brain-specific angiogenesis inhibitor 2                   | <b>-0.0156</b>   | <b>0.0024</b>     | 0.3747           | 0.2132            | <b>0.0029</b> | 2809 ± 219  | 2051 ± 120  | 2491 ± 244  | 1672 ± 149 |
| 205638_at   | BAI3     | brain-specific angiogenesis inhibitor 3                   | <b>-0.0339</b>   | <b>0.0293</b>     | -0.1654          | 0.4614            | <b>0.0291</b> | 2137 ± 289  | 1773 ± 187  | 1474 ± 173  | 1199 ± 145 |
| 205084_at   | BAP29    | B-cell receptor-associated protein BAP29                  | -0.5328          | <b>0.0442</b>     | -0.4716          | -0.3510           | 0.0891        | 148 ± 19    | 137 ± 20    | 146 ± 10    | 87 ± 19    |
| 213318_s_at | BAT3     | HLA-B associated transcript 3                             | -0.0874          | <b>0.0288</b>     | -0.4008          | -0.2591           | <b>0.0357</b> | 1678 ± 137  | 1814 ± 88   | 1683 ± 102  | 1302 ± 116 |
| 211703_s_at | BBP      | beta-amyloid binding protein precursor                    | <b>-0.0158</b>   | 0.1296            | -0.3977          | -0.2633           | 0.1250        | 388 ± 35    | 440 ± 24    | 283 ± 47    | 320 ± 66   |

| Probe set   | Name     | Description                                          | NFT <sub>0</sub> | MMSE <sub>0</sub> | NFT <sub>1</sub> | MMSE <sub>1</sub> | ANOVA         | Control    | Incipient  | Moderate   | Severe     |
|-------------|----------|------------------------------------------------------|------------------|-------------------|------------------|-------------------|---------------|------------|------------|------------|------------|
| 202121_s_at | BC-2     | putative breast adenocarcinoma marker                | -0.1174          | <b>0.0225</b>     | 0.2527           | -0.1914           | 0.0719        | 955 ± 74   | 945 ± 119  | 871 ± 93   | 620 ± 55   |
| 219107_at   | BCAN     | chondroitin sulfate proteoglycan BEHAB/brevican      | <b>-0.0120</b>   | <b>0.0013</b>     | 0.2249           | 0.1422            | 0.0932        | 615 ± 106  | 640 ± 32   | 457 ± 78   | 337 ± 96   |
| 203053_at   | BCAS2    | breast carcinoma amplified sequence 2                | -0.1778          | <b>0.0458</b>     | -0.4704          | 0.3028            | 0.0751        | 778 ± 106  | 703 ± 80   | 461 ± 32   | 570 ± 100  |
| 219497_s_at | BCL11A   | B-cell CLL/lymphoma 11A                              | <b>-0.0336</b>   | <b>0.0150</b>     | -0.3391          | 0.1646            | <b>0.0178</b> | 718 ± 94   | 570 ± 58   | 512 ± 95   | 328 ± 46   |
| 219528_s_at | BCL11B   | B-cell CLL/lymphoma 11B                              | <b>-0.0127</b>   | <b>0.0281</b>     | 0.1457           | 0.4365            | 0.0807        | 1046 ± 138 | 786 ± 122  | 767 ± 119  | 581 ± 97   |
| 202518_at   | BCL7B    | B-cell CLL/lymphoma 7B                               | -0.2025          | <b>0.0406</b>     | 0.2065           | 0.3203            | 0.2600        | 823 ± 86   | 795 ± 82   | 676 ± 83   | 613 ± 77   |
| 208946_s_at | BECN1    | beclin 1                                             | <b>-0.0084</b>   | <b>0.0030</b>     | -0.2274          | 0.1509            | 0.0975        | 546 ± 40   | 581 ± 43   | 531 ± 42   | 415 ± 46   |
| 202710_at   | BET1     | BET1 homolog                                         | -0.0824          | <b>0.0328</b>     | 0.2249           | 0.0656            | 0.2736        | 661 ± 40   | 608 ± 32   | 584 ± 67   | 520 ± 55   |
| 218332_at   | BEX1     | brain expressed, X-linked 1                          | <b>-0.0023</b>   | <b>0.0202</b>     | -0.2446          | 0.2807            | 0.0574        | 7804 ± 510 | 7299 ± 721 | 5861 ± 599 | 5633 ± 699 |
| 201170_s_at | BHLHB2   | basic helix-loop-helix domain containing, class B, 2 | <b>-0.0048</b>   | <b>0.0136</b>     | -0.2592          | 0.4721            | 0.0723        | 2077 ± 211 | 2024 ± 245 | 1613 ± 131 | 1365 ± 239 |
| 221702_s_at | BLP2     | BBP-like protein 2                                   | <b>-0.0031</b>   | <b>0.0008</b>     | -0.2221          | 0.1544            | 0.0623        | 3015 ± 303 | 2599 ± 328 | 2211 ± 129 | 1969 ± 330 |
| 203840_at   | BLZF1    | basic leucine zipper nuclear factor 1                | <b>-0.0341</b>   | 0.1739            | -0.4715          | <b>-0.0096</b>    | 0.1845        | 165 ± 14   | 147 ± 30   | 131 ± 18   | 99 ± 21    |
| 32088_at    | BLZF1    | basic leucine zipper nuclear factor 1                | <b>-0.0120</b>   | <b>0.0099</b>     | 0.4173           | 0.4551            | <b>0.0038</b> | 85 ± 9     | 67 ± 6     | 63 ± 8     | 40 ± 8     |
| 201849_at   | BNIP3    | BCL2/adenovirus E1B 19kDa interacting protein 3      | <b>-0.0221</b>   | <b>0.0241</b>     | 0.4302           | 0.0848            | <b>0.0326</b> | 4048 ± 394 | 3440 ± 384 | 3065 ± 119 | 2666 ± 268 |
| 221478_at   | BNIP3L   | BCL2/adenovirus E1B 19kDa interacting protein 3-like | <b>-0.0455</b>   | 0.0866            | 0.3862           | -0.1853           | <b>0.0537</b> | 2755 ± 131 | 3236 ± 153 | 2674 ± 284 | 2335 ± 126 |
| 205550_s_at | BRE      | brain and reproductive organ-expressed               | <b>-0.0138</b>   | <b>0.0120</b>     | -0.3178          | -0.4768           | 0.2589        | 845 ± 54   | 808 ± 80   | 697 ± 47   | 725 ± 60   |
| 208906_at   | BSCL2    | Bernardinelli-Seip congenital lipodystrophy 2        | <b>-0.0312</b>   | <b>0.0461</b>     | -0.2136          | 0.3797            | 0.0772        | 2986 ± 347 | 2493 ± 611 | 2097 ± 389 | 1370 ± 366 |
| 208677_s_at | BSG      | basigin                                              | -0.0571          | <b>0.0295</b>     | -0.1860          | 0.3601            | 0.1526        | 789 ± 108  | 782 ± 105  | 716 ± 69   | 484 ± 112  |
| 204586_at   | BSN      | bassoon                                              | <b>-0.0234</b>   | <b>0.0005</b>     | 0.3272           | 0.2580            | 0.1293        | 990 ± 141  | 729 ± 114  | 708 ± 98   | 593 ± 113  |
| 203944_x_at | BTN2A1   | butyrophilin, subfamily 2, member A1                 | <b>-0.0240</b>   | 0.6333            | -0.1731          | 0.2806            | 0.5435        | 500 ± 26   | 489 ± 30   | 437 ± 19   | 479 ± 54   |
| 218048_at   | BUP      | BUP protein                                          | <b>-0.0261</b>   | 0.1184            | -0.4689          | -0.2383           | 0.2276        | 861 ± 54   | 930 ± 72   | 775 ± 27   | 769 ± 76   |
| 215241_at   | C11orf25 | chromosome 11 open reading frame 25                  | <b>-0.0145</b>   | <b>0.0149</b>     | 0.0598           | <b>-0.0039</b>    | <b>0.0095</b> | 1945 ± 278 | 1857 ± 312 | 1471 ± 258 | 599 ± 120  |
| 219099_at   | C12orf5  | chromosome 12 open reading frame 5                   | <b>-0.0068</b>   | <b>0.0031</b>     | -0.3120          | 0.1009            | <b>0.0381</b> | 234 ± 11   | 250 ± 15   | 229 ± 19   | 175 ± 23   |
| 202279_at   | C14orf2  | chromosome 14 open reading frame 2                   | <b>-0.0058</b>   | <b>0.0044</b>     | -0.4460          | 0.1046            | <b>0.0128</b> | 3699 ± 375 | 2787 ± 349 | 2540 ± 211 | 2207 ± 282 |
| 210532_s_at | C14orf2  | chromosome 14 open reading frame 2                   | <b>-0.0109</b>   | <b>0.0036</b>     | 0.4404           | 0.1401            | <b>0.0353</b> | 6081 ± 629 | 5182 ± 647 | 4197 ± 390 | 3708 ± 671 |
| 201491_at   | C14orf3  | chromosome 14 open reading frame 3                   | <b>-0.0027</b>   | 0.0614            | <b>-0.0040</b>   | 0.2347            | <b>0.0385</b> | 1439 ± 66  | 1180 ± 124 | 1136 ± 74  | 1008 ± 124 |
| 209755_at   | C1orf15  | chromosome 1 open reading frame 15                   | <b>-0.0208</b>   | <b>0.0251</b>     | -0.4381          | -0.4971           | <b>0.0140</b> | 1460 ± 221 | 1155 ± 161 | 741 ± 76   | 772 ± 136  |
| 221272_s_at | C1orf21  | chromosome 1 open reading frame 21                   | <b>-0.0126</b>   | <b>0.0054</b>     | 0.2226           | -0.3614           | 0.1142        | 769 ± 28   | 781 ± 66   | 731 ± 45   | 607 ± 57   |
| 219443_at   | C20orf13 | chromosome 20 open reading frame 13                  | -0.1798          | <b>0.0281</b>     | 0.3201           | -0.4428           | 0.0706        | 258 ± 30   | 217 ± 32   | 172 ± 7    | 172 ± 25   |
| 217935_s_at | C20orf44 | chromosome 20 open reading frame 44                  | -0.1049          | <b>0.0092</b>     | 0.3013           | 0.2834            | 0.0892        | 951 ± 90   | 919 ± 56   | 793 ± 42   | 717 ± 46   |
| 218359_at   | C20orf98 | chromosome 20 open reading frame 98                  | -0.5784          | <b>0.0478</b>     | 0.3913           | 0.4624            | 0.0705        | 992 ± 131  | 1088 ± 169 | 1142 ± 135 | 590 ± 166  |
| 206436_at   | C22orf1  | chromosome 22 open reading frame 1                   | -0.2720          | <b>0.0362</b>     | 0.0949           | 0.4410            | 0.1990        | 637 ± 43   | 710 ± 98   | 621 ± 62   | 489 ± 73   |
| 209418_s_at | C22orf19 | chromosome 22 open reading frame 19                  | <b>-0.0034</b>   | 0.3665            | 0.3584           | 0.0707            | 0.5568        | 252 ± 17   | 228 ± 8    | 213 ± 25   | 211 ± 36   |
| 202614_at   | C4orf1   | chromosome 4 open reading frame 1                    | <b>-0.0050</b>   | <b>0.0017</b>     | 0.2290           | -0.3963           | <b>0.0230</b> | 1240 ± 143 | 1158 ± 144 | 1021 ± 92  | 663 ± 65   |
| 209829_at   | C6orf32  | chromosome 6 open reading frame 32                   | <b>-0.0356</b>   | <b>0.0495</b>     | 0.4126           | -0.4550           | <b>0.0125</b> | 646 ± 49   | 639 ± 88   | 530 ± 57   | 357 ± 53   |
| 202241_at   | C8FW     | phosphoprotein regulated by mitogenic pathways       | <b>-0.0085</b>   | <b>0.0369</b>     | 0.1424           | <b>0.0373</b>     | 0.1839        | 552 ± 48   | 489 ± 38   | 462 ± 39   | 426 ± 18   |
| 204480_s_at | C9orf16  | chromosome 9 open reading frame 16                   | <b>-0.0422</b>   | 0.0659            | 0.2070           | <b>0.0500</b>     | 0.4089        | 3883 ± 324 | 4271 ± 733 | 3433 ± 509 | 3056 ± 441 |
| 222165_x_at | C9orf16  | chromosome 9 open reading frame 16                   | <b>-0.0444</b>   | <b>0.0110</b>     | 0.1698           | 0.3104            | 0.3484        | 1259 ± 123 | 1250 ± 136 | 1089 ± 162 | 914 ± 176  |
| 209726_at   | CA11     | carbonic anhydrase XI                                | <b>-0.0369</b>   | <b>0.0053</b>     | -0.3455          | 0.4228            | <b>0.0003</b> | 2445 ± 151 | 2410 ± 219 | 2809 ± 227 | 1500 ± 106 |

| Probe set   | Name     | Description                                                 | NFT <sub>0</sub> | MMSE <sub>0</sub> | NFT <sub>1</sub> | MMSE <sub>1</sub> | ANOVA         | Control    | Incipient  | Moderate   | Severe      |
|-------------|----------|-------------------------------------------------------------|------------------|-------------------|------------------|-------------------|---------------|------------|------------|------------|-------------|
| 208321_s_at | CABP1    | calcium binding protein 1                                   | <b>-0.0527</b>   | <b>0.0163</b>     | -0.2668          | 0.4356            | 0.1159        | 1148 ± 167 | 891 ± 104  | 838 ± 183  | 575 ± 132   |
| 210181_s_at | CABP1    | calcium binding protein 1                                   | <b>-0.0232</b>   | <b>0.0251</b>     | -0.2262          | 0.3577            | <b>0.0435</b> | 539 ± 130  | 478 ± 110  | 274 ± 59   | 149 ± 28    |
| 207776_s_at | CACNB2   | calcium channel, voltage-dependent, beta 2 subunit          | <b>-0.0469</b>   | <b>0.0500</b>     | -0.4754          | 0.3215            | 0.0952        | 342 ± 40   | 283 ± 50   | 235 ± 25   | 227 ± 18    |
| 213714_at   | CACNB2   | calcium channel, voltage-dependent, beta 2 subunit          | <b>-0.0011</b>   | <b>0.0002</b>     | -0.3438          | 0.4533            | 0.0965        | 699 ± 135  | 447 ± 98   | 373 ± 75   | 375 ± 87    |
| 206384_at   | CACNG3   | calcium channel, voltage-dependent, gamma subunit 3         | <b>-0.0065</b>   | <b>0.0008</b>     | 0.0601           | -0.4690           | <b>0.0009</b> | 1378 ± 179 | 1050 ± 144 | 889 ± 134  | 396 ± 91    |
| 204814_at   | CADPS    | Ca <sup>2+</sup> -dependent activator protein for secretion | <b>-0.0307</b>   | <b>0.0525</b>     | <b>0.0209</b>    | <b>-0.0307</b>    | <b>0.0009</b> | 465 ± 16   | 625 ± 43   | 405 ± 49   | 419 ± 16    |
| 209563_x_at | CALM1    | calmodulin 1                                                | -0.0799          | <b>0.0328</b>     | -0.3477          | 0.4814            | <b>0.0483</b> | 9478 ± 582 | 8506 ± 417 | 6800 ± 613 | 7797 ± 1024 |
| 200622_x_at | CALM3    | calmodulin 3                                                | <b>-0.0071</b>   | <b>0.0003</b>     | -0.4056          | 0.1882            | <b>0.0068</b> | 1472 ± 147 | 1607 ± 210 | 1149 ± 54  | 905 ± 93    |
| 212952_at   | CALR     | calreticulin                                                | <b>-0.0412</b>   | 0.2092            | -0.3119          | -0.2369           | 0.4102        | 780 ± 96   | 748 ± 65   | 676 ± 44   | 612 ± 68    |
| 217128_s_at | CAMK1G   | calcium/calmodulin-dependent protein kinase IG              | <b>-0.0193</b>   | 0.0825            | 0.3546           | -0.2861           | 0.0804        | 343 ± 50   | 486 ± 98   | 314 ± 46   | 251 ± 31    |
| 215161_at   | CAMK1G   | calcium/calmodulin-dependent protein kinase IG              | <b>-0.0081</b>   | <b>0.0127</b>     | -0.2239          | 0.1883            | <b>0.0030</b> | 527 ± 98   | 367 ± 88   | 255 ± 65   | 49 ± 11     |
| 213108_at   | CAMK2A   | calcium/calmodulin-dependent protein kinase II alpha        | <b>-0.0149</b>   | <b>0.0028</b>     | 0.4553           | <b>0.0438</b>     | 0.0930        | 5507 ± 582 | 4530 ± 733 | 4188 ± 944 | 2766 ± 316  |
| 212252_at   | CAMKK2   | calcium/calmodulin-dependent protein kinase kinase 2, beta  | <b>-0.0041</b>   | <b>0.0200</b>     | -0.2774          | 0.3730            | 0.0569        | 889 ± 47   | 825 ± 31   | 778 ± 96   | 626 ± 56    |
| 200625_s_at | CAP      | adenylyl cyclase-associated protein                         | <b>-0.0379</b>   | <b>0.0089</b>     | 0.3239           | 0.2932            | <b>0.0193</b> | 3145 ± 172 | 2707 ± 149 | 2605 ± 77  | 2415 ± 221  |
| 212551_at   | CAP2     | adenylyl cyclase-associated protein 2                       | -0.1058          | <b>0.0282</b>     | 0.2603           | 0.2038            | 0.1583        | 1894 ± 362 | 1588 ± 321 | 1106 ± 121 | 1173 ± 202  |
| 212554_at   | CAP2     | adenylyl cyclase-associated protein 2                       | <b>-0.0037</b>   | <b>0.0146</b>     | 0.2367           | 0.4717            | 0.0881        | 3701 ± 716 | 2980 ± 526 | 2384 ± 170 | 1740 ± 470  |
| 200001_at   | CAPNS1   | calpain, small subunit 1                                    | <b>-0.0042</b>   | <b>0.0058</b>     | -0.3994          | 0.2378            | 0.0954        | 3062 ± 173 | 3120 ± 252 | 2919 ± 222 | 2278 ± 340  |
| 215153_at   | CAPON    | C-terminal PDZ domain ligand of neuronal NO synthase        | -0.2234          | <b>0.0056</b>     | 0.4427           | <b>0.0549</b>     | 0.0951        | 793 ± 97   | 710 ± 115  | 704 ± 160  | 370 ± 72    |
| 208534_s_at | CAPRI    | Ca <sup>2+</sup> -promoted Ras inactivator                  | -0.6048          | <b>0.0484</b>     | -0.4573          | -0.3170           | 0.0602        | 281 ± 27   | 332 ± 24   | 285 ± 26   | 214 ± 27    |
| 219342_at   | CAS1     | O-acetyltransferase                                         | <b>-0.0318</b>   | <b>0.0019</b>     | -0.1775          | -0.4263           | 0.0552        | 1152 ± 130 | 1043 ± 129 | 880 ± 57   | 721 ± 110   |
| 222201_s_at | CASP8AP2 | CASP8 associated protein 2                                  | <b>-0.0193</b>   | <b>0.0233</b>     | 0.2591           | -0.3218           | <b>0.0001</b> | 510 ± 37   | 483 ± 41   | 518 ± 21   | 272 ± 20    |
| 216903_s_at | CBARA1   | calcium binding atopy-related autoantigen 1                 | <b>-0.0085</b>   | <b>0.0210</b>     | -0.1862          | 0.2157            | 0.0914        | 1141 ± 26  | 1193 ± 44  | 1081 ± 43  | 1048 ± 50   |
| 205528_s_at | CBFA2T1  | core-binding factor, runt domain, alpha subunit 2           | -0.3651          | <b>0.0316</b>     | 0.1555           | -0.2604           | 0.0870        | 189 ± 24   | 180 ± 8    | 122 ± 14   | 138 ± 25    |
| 205827_at   | CCK      | cholecystokinin                                             | <b>-0.0036</b>   | <b>0.0149</b>     | 0.4920           | -0.2213           | <b>0.0385</b> | 2013 ± 305 | 1517 ± 459 | 815 ± 147  | 1078 ± 252  |
| 205899_at   | CCNA1    | cyclin A1                                                   | <b>-0.0452</b>   | 0.1029            | -0.2604          | 0.0793            | 0.0834        | 383 ± 41   | 296 ± 38   | 251 ± 20   | 288 ± 46    |
| 200953_s_at | CCND2    | cyclin D2                                                   | <b>-0.0066</b>   | <b>0.0166</b>     | -0.3090          | 0.1804            | <b>0.0351</b> | 1669 ± 104 | 1683 ± 156 | 1318 ± 139 | 1178 ± 161  |
| 211559_s_at | CCNG2    | cyclin G2                                                   | <b>-0.0017</b>   | <b>0.0205</b>     | -0.2864          | 0.3676            | <b>0.0191</b> | 303 ± 33   | 247 ± 15   | 233 ± 24   | 175 ± 28    |
| 204093_at   | CCNH     | cyclin H                                                    | <b>-0.0087</b>   | <b>0.0396</b>     | <b>-0.0258</b>   | 0.2629            | 0.0891        | 977 ± 90   | 907 ± 144  | 692 ± 68   | 645 ± 120   |
| 201947_s_at | CCT2     | chaperonin containing TCP1, subunit 2                       | -0.1040          | <b>0.0442</b>     | -0.1558          | <b>0.0115</b>     | 0.1182        | 1961 ± 144 | 1737 ± 60  | 1436 ± 110 | 1562 ± 265  |
| 200910_at   | CCT3     | chaperonin containing TCP1, subunit 3                       | <b>-0.0068</b>   | 0.1135            | <b>-0.0039</b>   | 0.2583            | 0.1063        | 1682 ± 105 | 1396 ± 100 | 1491 ± 67  | 1288 ± 162  |
| 200877_at   | CCT4     | chaperonin containing TCP1, subunit 4                       | <b>-0.0136</b>   | 0.0565            | -0.2119          | <b>0.0384</b>     | 0.1370        | 2441 ± 400 | 1690 ± 221 | 1675 ± 194 | 1460 ± 323  |
| 208696_at   | CCT5     | chaperonin containing TCP1, subunit 5                       | <b>-0.0357</b>   | 0.4168            | <b>-0.0205</b>   | 0.1860            | 0.1592        | 1481 ± 115 | 1170 ± 176 | 967 ± 43   | 1225 ± 251  |
| 200985_s_at | CD59     | CD59 antigen p18-20                                         | <b>-0.0140</b>   | 0.1447            | -0.1724          | 0.2436            | 0.2818        | 2247 ± 184 | 1909 ± 202 | 1786 ± 167 | 1696 ± 299  |
| 200983_x_at | CD59     | CD59 antigen p18-20                                         | <b>-0.0232</b>   | <b>0.0060</b>     | <b>-0.0030</b>   | 0.1676            | 0.1173        | 1412 ± 273 | 1082 ± 143 | 1137 ± 172 | 663 ± 88    |
| 217881_s_at | CDC27    | cell division cycle 27                                      | <b>-0.0092</b>   | <b>0.0005</b>     | 0.4716           | 0.2351            | <b>0.0080</b> | 148 ± 15   | 110 ± 17   | 120 ± 18   | 58 ± 11     |
| 214230_at   | CDC42    | cell division cycle 42                                      | -0.0724          | <b>0.0236</b>     | -0.4514          | 0.4286            | 0.0905        | 822 ± 128  | 654 ± 102  | 466 ± 80   | 499 ± 113   |
| 210232_at   | CDC42    | cell division cycle 42                                      | <b>-0.0403</b>   | <b>0.0029</b>     | 0.4667           | 0.1006            | <b>0.0034</b> | 542 ± 63   | 523 ± 52   | 317 ± 36   | 321 ± 33    |
| 209056_s_at | CDC5L    | CDC5 cell division cycle 5-like                             | <b>-0.0165</b>   | <b>0.0004</b>     | -0.3898          | 0.1676            | <b>0.0145</b> | 676 ± 37   | 624 ± 48   | 578 ± 26   | 492 ± 41    |
| 220115_s_at | CDH10    | cadherin 10, type 2                                         | <b>-0.0143</b>   | <b>0.0106</b>     | -0.4841          | 0.4099            | <b>0.0006</b> | 1441 ± 129 | 1128 ± 93  | 903 ± 74   | 830 ± 60    |

| Probe set   | Name     | Description                                          | NFT <sub>0</sub> | MMSE <sub>0</sub> | NFT <sub>1</sub> | MMSE <sub>1</sub> | ANOVA  | Control     | Incipient   | Moderate    | Severe      |
|-------------|----------|------------------------------------------------------|------------------|-------------------|------------------|-------------------|--------|-------------|-------------|-------------|-------------|
| 207172_s_at | CDH11    | cadherin 11, type 2, OB-cadherin                     | -0.0038          | 0.0303            | 0.0208           | -0.4522           | 0.0659 | 248 ± 23    | 218 ± 44    | 164 ± 11    | 153 ± 26    |
| 207173_x_at | CDH11    | cadherin 11, type 2, OB-cadherin                     | -0.0493          | 0.0075            | -0.1495          | 0.1995            | 0.0991 | 892 ± 65    | 835 ± 64    | 721 ± 72    | 668 ± 69    |
| 204726_at   | CDH13    | cadherin 13, H-cadherin                              | -0.0062          | 0.0005            | 0.3355           | 0.3721            | 0.0665 | 136 ± 20    | 107 ± 25    | 75 ± 19     | 61 ± 10     |
| 206280_at   | CDH18    | cadherin 18, type 2                                  | -0.2637          | 0.0094            | 0.2671           | 0.2251            | 0.1480 | 650 ± 70    | 638 ± 112   | 575 ± 97    | 385 ± 56    |
| 217574_at   | CDH8     | cadherin 8, type 2                                   | -0.0110          | 0.7485            | 0.3316           | -0.4476           | 0.2528 | 123 ± 11    | 123 ± 19    | 80 ± 12     | 121 ± 28    |
| 204247_s_at | CDK5     | cyclin-dependent kinase 5                            | -0.0323          | 0.0150            | -0.4969          | -0.2199           | 0.0131 | 1026 ± 97   | 935 ± 76    | 781 ± 66    | 573 ± 118   |
| 204995_at   | CDK5R1   | cyclin-dependent kinase 5, regulatory subunit 1      | -0.0163          | 0.0021            | -0.0137          | 0.0265            | 0.1154 | 2690 ± 232  | 2480 ± 274  | 2387 ± 227  | 1808 ± 286  |
| 211297_s_at | CDK7     | cyclin-dependent kinase 7                            | -0.0063          | 0.0161            | -0.2259          | 0.3587            | 0.0118 | 219 ± 12    | 186 ± 9     | 169 ± 32    | 105 ± 24    |
| 210240_s_at | CDKN2D   | cyclin-dependent kinase inhibitor 2D                 | -0.0150          | 0.4288            | -0.0701          | 0.3124            | 0.2412 | 298 ± 27    | 216 ± 31    | 204 ± 28    | 232 ± 53    |
| 204154_at   | CDO1     | cysteine dioxygenase, type I                         | -0.0050          | 0.0016            | 0.0131           | 0.2700            | 0.0331 | 1251 ± 133  | 1046 ± 147  | 742 ± 76    | 829 ± 133   |
| 212864_at   | CDS2     | CDP-diacylglycerol synthase 2                        | -0.0128          | 0.5775            | 0.2281           | 0.0688            | 0.0878 | 830 ± 22    | 852 ± 27    | 731 ± 27    | 831 ± 59    |
| 215080_s_at | CENTG1   | centaurin, gamma 1                                   | -0.0185          | 0.0128            | -0.0028          | -0.4291           | 0.0065 | 161 ± 25    | 133 ± 16    | 86 ± 18     | 58 ± 13     |
| 219375_at   | CEPT1    | choline/ethanolaminephosphotransferase               | -0.0270          | 0.0252            | -0.2786          | 0.4410            | 0.0060 | 636 ± 68    | 500 ± 83    | 568 ± 34    | 294 ± 31    |
| 205651_x_at | CGEF2    | cAMP-regulated guanine nucleotide exchange factor II | -0.0226          | 0.0665            | -0.1317          | -0.1712           | 0.0794 | 1436 ± 127  | 1375 ± 125  | 1386 ± 189  | 918 ± 47    |
| 217783_s_at | CGI-127  | yippee protein                                       | -0.0040          | 0.0331            | -0.2083          | 0.1157            | 0.1751 | 2867 ± 234  | 2640 ± 289  | 2266 ± 224  | 2124 ± 301  |
| 209526_s_at | CGI-142  | hepatoma-derived growth factor 2                     | -0.0189          | 0.0558            | -0.1429          | -0.4209           | 0.1904 | 1273 ± 161  | 1152 ± 152  | 977 ± 118   | 868 ± 91    |
| 216693_x_at | CGI-142  | hepatoma-derived growth factor 2                     | -0.0239          | 0.0352            | 0.4068           | -0.1320           | 0.0738 | 1144 ± 111  | 998 ± 86    | 818 ± 73    | 872 ± 91    |
| 209524_at   | CGI-142  | hepatoma-derived growth factor 2                     | -0.0183          | 0.0099            | 0.1093           | 0.1474            | 0.0948 | 1729 ± 173  | 1629 ± 161  | 1518 ± 117  | 1206 ± 102  |
| 201570_at   | CGI-51   | CGI-51 protein                                       | -0.0857          | 0.0497            | -0.4275          | -0.3504           | 0.1967 | 511 ± 44    | 546 ± 65    | 468 ± 35    | 395 ± 50    |
| 201569_s_at | CGI-51   | CGI-51 protein                                       | -0.0099          | 0.0054            | -0.4190          | 0.4325            | 0.0657 | 249 ± 25    | 249 ± 14    | 205 ± 23    | 173 ± 14    |
| 204697_s_at | CHGA     | chromogranin A                                       | -0.0921          | 0.0243            | -0.3461          | 0.2845            | 0.1283 | 1633 ± 242  | 1343 ± 329  | 960 ± 186   | 972 ± 118   |
| 204591_at   | CHL1     | cell adhesion molecule with homology to L1CAM        | -0.0507          | 0.0103            | 0.4956           | -0.2069           | 0.0491 | 1953 ± 265  | 1870 ± 314  | 1710 ± 211  | 970 ± 202   |
| 212624_s_at | CHN1     | chimerin 1                                           | -0.0129          | 0.0385            | -0.0672          | 0.4678            | 0.0413 | 3955 ± 1705 | 1533 ± 1498 | 1088 ± 1397 | 7492 ± 1820 |
| 214665_s_at | CHP      | calcium binding protein P22                          | -0.0504          | 0.0411            | 0.3693           | 0.3649            | 0.1622 | 1473 ± 178  | 1461 ± 209  | 1035 ± 124  | 1062 ± 201  |
| 200884_at   | CKB      | creatine kinase, brain                               | -0.1076          | 0.0380            | 0.0523           | 0.4316            | 0.3358 | 4370 ± 295  | 4522 ± 248  | 4302 ± 434  | 3598 ± 438  |
| 202712_s_at | CKMT1    | creatine kinase, mitochondrial 1                     | -0.1097          | 0.0103            | -0.4046          | 0.4797            | 0.1204 | 1283 ± 145  | 1158 ± 166  | 1060 ± 187  | 749 ± 93    |
| 204170_s_at | CKS2     | CDC28 protein kinase 2                               | -0.0239          | 0.2937            | -0.0140          | 0.1114            | 0.1372 | 225 ± 36    | 139 ± 12    | 191 ± 10    | 154 ± 31    |
| 212308_at   | CLASP2   | cytoplasmic linker associated protein 2              | -0.1006          | 0.0364            | 0.0528           | -0.1170           | 0.0391 | 1088 ± 119  | 1226 ± 103  | 1096 ± 80   | 796 ± 57    |
| 212306_at   | CLASP2   | cytoplasmic linker associated protein 2              | -0.0008          | 0.0006            | -0.0275          | 0.0899            | 0.0371 | 2139 ± 97   | 1732 ± 218  | 1741 ± 177  | 1385 ± 178  |
| 205328_at   | CLDN10   | claudin 10                                           | -0.0275          | 0.0082            | -0.3097          | 0.0867            | 0.0059 | 1243 ± 103  | 975 ± 50    | 847 ± 137   | 666 ± 105   |
| 213415_at   | CLIC2    | chloride intracellular channel 2                     | -0.0493          | 0.0763            | -0.0229          | 0.1437            | 0.0401 | 105 ± 30    | 30 ± 8      | 55 ± 15     | 24 ± 5      |
| 212358_at   | CLIPR-59 | CLIP-170-related protein                             | -0.2073          | 0.0011            | -0.0029          | 0.2576            | 0.0076 | 4117 ± 165  | 3717 ± 244  | 3897 ± 334  | 2845 ± 187  |
| 200614_at   | CLTC     | clathrin, heavy polypeptide                          | -0.0037          | 0.0005            | -0.4060          | -0.2603           | 0.0410 | 7243 ± 670  | 6486 ± 304  | 5105 ± 392  | 5126 ± 842  |
| 206731_at   | CNK2     | connector enhancer of KSR2                           | -0.1118          | 0.0353            | 0.2282           | 0.2341            | 0.1553 | 862 ± 201   | 683 ± 164   | 411 ± 88    | 483 ± 108   |
| 220166_at   | CNNM1    | cyclin M1                                            | -0.0196          | 0.0047            | -0.4636          | 0.4948            | 0.0024 | 616 ± 35    | 621 ± 78    | 523 ± 66    | 302 ± 20    |
| 218250_s_at | CNOT7    | CCR4-NOT transcription complex, subunit 7            | -0.0004          | 0.0007            | -0.1001          | 0.1061            | 0.0237 | 1628 ± 56   | 1649 ± 58   | 1422 ± 65   | 1344 ± 117  |
| 213436_at   | CNR1     | cannabinoid receptor 1                               | -0.0111          | 0.0357            | -0.0599          | 0.0418            | 0.0005 | 1329 ± 131  | 910 ± 166   | 520 ± 65    | 578 ± 149   |
| 219301_s_at | CNTNAP2  | contactin associated protein-like 2                  | -0.0096          | 0.0561            | -0.2951          | 0.2199            | 0.0670 | 629 ± 91    | 485 ± 73    | 339 ± 32    | 408 ± 89    |
| 211980_at   | COL4A1   | collagen, type IV, alpha 1                           | 0.0000           | 0.0006            | -0.0327          | 0.0227            | 0.0339 | 689 ± 86    | 447 ± 65    | 423 ± 66    | 381 ± 79    |

| Probe set   | Name    | Description                                            | NFT <sub>0</sub> | MMSE <sub>0</sub> | NFT <sub>1</sub> | MMSE <sub>1</sub> | ANOVA         | Control     | Incipient   | Moderate    | Severe     |
|-------------|---------|--------------------------------------------------------|------------------|-------------------|------------------|-------------------|---------------|-------------|-------------|-------------|------------|
| 221729_at   | COL5A2  | collagen, type V, alpha 2                              | <b>0.0000</b>    | <b>0.0007</b>     | <b>-0.0116</b>   | <b>0.0176</b>     | <b>0.0000</b> | 4206 ± 290  | 1922 ± 298  | 766 ± 124   | 1310 ± 522 |
| 221730_at   | COL5A2  | collagen, type V, alpha 2                              | <b>-0.0096</b>   | <b>0.0051</b>     | -0.0944          | 0.1228            | <b>0.0000</b> | 1659 ± 134  | 724 ± 123   | 195 ± 45    | 456 ± 222  |
| 202143_s_at | COP9    | COP9 homolog                                           | <b>-0.0456</b>   | <b>0.0086</b>     | 0.3430           | 0.1456            | <b>0.0303</b> | 415 ± 52    | 304 ± 50    | 251 ± 29    | 211 ± 61   |
| 202141_s_at | COP9    | COP9 homolog                                           | <b>-0.0315</b>   | <b>0.0162</b>     | -0.2004          | 0.1845            | <b>0.0427</b> | 3053 ± 330  | 2455 ± 262  | 2320 ± 136  | 1995 ± 226 |
| 202142_at   | COP9    | COP9 homolog                                           | <b>-0.0366</b>   | <b>0.0154</b>     | -0.1159          | -0.2309           | <b>0.0287</b> | 1267 ± 78   | 1187 ± 102  | 930 ± 80    | 1000 ± 75  |
| 208684_at   | COPA    | coatamer protein complex, subunit alpha                | <b>-0.0473</b>   | 0.3604            | -0.4467          | -0.1221           | 0.6131        | 1527 ± 68   | 1631 ± 56   | 1440 ± 142  | 1457 ± 109 |
| 218042_at   | COPS4   | COP9 constitutive photomorphogenic homolog subunit 4   | <b>-0.0414</b>   | <b>0.0530</b>     | 0.4664           | 0.1270            | 0.1017        | 1411 ± 162  | 1218 ± 149  | 929 ± 87    | 1040 ± 166 |
| 201652_at   | COPS5   | COP9 constitutive photomorphogenic homolog subunit 5   | <b>-0.0029</b>   | 0.1119            | <b>-0.0347</b>   | 0.4678            | 0.2415        | 1170 ± 60   | 1079 ± 167  | 885 ± 84    | 916 ± 127  |
| 209029_at   | COPS7A  | COP9 constitutive photomorphogenic homolog subunit 7A  | <b>-0.0187</b>   | <b>0.0086</b>     | 0.4964           | -0.4636           | 0.0642        | 1094 ± 75   | 1102 ± 102  | 1009 ± 74   | 797 ± 87   |
| 211727_s_at | COX11   | COX11 homolog, cytochrome c oxidase assembly protein   | <b>-0.0002</b>   | <b>0.0008</b>     | -0.0663          | 0.4055            | <b>0.0520</b> | 627 ± 86    | 578 ± 87    | 492 ± 48    | 330 ± 42   |
| 202698_x_at | COX4I1  | cytochrome c oxidase subunit IV isoform 1              | <b>-0.0062</b>   | <b>0.0061</b>     | -0.4319          | 0.2970            | <b>0.0040</b> | 9240 ± 396  | 8813 ± 577  | 7597 ± 578  | 6651 ± 418 |
| 200086_s_at | COX4I1  | cytochrome c oxidase subunit IV isoform 1              | <b>-0.0001</b>   | <b>0.0005</b>     | -0.1103          | 0.3323            | <b>0.0099</b> | 4745 ± 303  | 4355 ± 244  | 4522 ± 295  | 3153 ± 438 |
| 203663_s_at | COX5A   | cytochrome c oxidase subunit Va                        | <b>-0.0477</b>   | 0.3337            | -0.4746          | -0.2231           | 0.3107        | 2564 ± 323  | 2615 ± 373  | 1815 ± 166  | 2233 ± 435 |
| 211025_x_at | COX5B   | cytochrome c oxidase subunit Vb                        | <b>-0.0171</b>   | 0.0881            | -0.2443          | -0.3922           | 0.2782        | 3810 ± 296  | 3875 ± 584  | 3088 ± 274  | 2881 ± 526 |
| 200925_at   | COX6A1  | cytochrome c oxidase subunit VIa polypeptide 1         | <b>-0.0087</b>   | <b>0.0019</b>     | -0.1796          | 0.1680            | <b>0.0020</b> | 12723 ± 648 | 1497 ± 1254 | 10636 ± 698 | 7477 ± 934 |
| 201441_at   | COX6B   | cytochrome c oxidase subunit VIb                       | <b>-0.0011</b>   | <b>0.0045</b>     | -0.4819          | 0.4836            | <b>0.0084</b> | 3088 ± 164  | 2698 ± 207  | 2729 ± 175  | 2067 ± 236 |
| 201754_at   | COX6C   | cytochrome c oxidase subunit VIc                       | <b>-0.0365</b>   | <b>0.0106</b>     | 0.2968           | <b>0.0477</b>     | <b>0.0241</b> | 7154 ± 660  | 6528 ± 778  | 4910 ± 480  | 4418 ± 813 |
| 201597_at   | COX7A2  | cytochrome c oxidase subunit VIIa polypeptide 2        | <b>-0.0016</b>   | <b>0.0510</b>     | -0.4257          | -0.1955           | <b>0.0486</b> | 5682 ± 223  | 5448 ± 435  | 5574 ± 386  | 4261 ± 465 |
| 201256_at   | COX7A2L | cytochrome c oxidase subunit VIIa polypeptide 2 like   | <b>-0.0042</b>   | <b>0.0011</b>     | -0.4572          | -0.4843           | <b>0.0134</b> | 2624 ± 221  | 2158 ± 70   | 1833 ± 81   | 1970 ± 221 |
| 202110_at   | COX7B   | cytochrome c oxidase subunit VIIb                      | <b>-0.0033</b>   | <b>0.0009</b>     | -0.2401          | <b>0.0316</b>     | <b>0.0081</b> | 3112 ± 202  | 2907 ± 267  | 2298 ± 200  | 1876 ± 366 |
| 213846_at   | COX7C   | cytochrome c oxidase subunit VIIc                      | <b>-0.0075</b>   | <b>0.0219</b>     | -0.4041          | 0.3766            | <b>0.0021</b> | 1180 ± 99   | 916 ± 81    | 841 ± 31    | 748 ± 66   |
| 201134_x_at | COX7C   | cytochrome c oxidase subunit VIIc                      | <b>-0.0285</b>   | <b>0.0352</b>     | 0.0873           | -0.0800           | 0.1328        | 4528 ± 388  | 4138 ± 386  | 3705 ± 372  | 3135 ± 494 |
| 201119_s_at | COX8    | cytochrome c oxidase subunit VIII                      | <b>-0.0387</b>   | 0.0862            | -0.4139          | 0.2828            | 0.2939        | 2745 ± 212  | 2695 ± 174  | 2211 ± 241  | 2146 ± 419 |
| 210408_s_at | CPNE6   | copine VI                                              | -0.0711          | <b>0.0434</b>     | 0.2474           | 0.2488            | 0.2977        | 805 ± 117   | 738 ± 161   | 631 ± 87    | 490 ± 74   |
| 202469_s_at | CPSF6   | cleavage and polyadenylation specific factor 6, 68kDa  | <b>-0.0235</b>   | <b>0.0378</b>     | 0.2689           | <b>0.0300</b>     | <b>0.0032</b> | 445 ± 21    | 475 ± 20    | 482 ± 10    | 348 ± 36   |
| 205630_at   | CRH     | corticotropin releasing hormone                        | <b>-0.0206</b>   | <b>0.0113</b>     | -0.3332          | -0.3983           | 0.0581        | 247 ± 48    | 186 ± 39    | 108 ± 10    | 154 ± 21   |
| 211698_at   | CRI1    | CREBBP/EP300 inhibitory protein 1                      | -0.1183          | <b>0.0156</b>     | 0.1867           | -0.1807           | <b>0.0117</b> | 1411 ± 183  | 1546 ± 64   | 1405 ± 132  | 790 ± 105  |
| 208669_s_at | CRI1    | CREBBP/EP300 inhibitory protein 1                      | <b>-0.0489</b>   | <b>0.0212</b>     | 0.4501           | 0.1914            | <b>0.0455</b> | 1687 ± 244  | 1599 ± 311  | 1072 ± 114  | 835 ± 143  |
| 202551_s_at | CRIM1   | cysteine-rich motor neuron 1                           | <b>-0.0068</b>   | 0.0796            | -0.1490          | <b>-0.0470</b>    | 0.0951        | 701 ± 55    | 659 ± 55    | 650 ± 64    | 494 ± 56   |
| 202517_at   | CRMP1   | collapsin response mediator protein 1                  | <b>-0.0033</b>   | <b>0.0014</b>     | -0.1276          | 0.1445            | 0.2375        | 1857 ± 55   | 1938 ± 205  | 1651 ± 187  | 1501 ± 153 |
| 219913_s_at | CRNKL1  | Crn, crooked neck-like 1                               | <b>-0.0108</b>   | <b>0.0004</b>     | -0.1169          | 0.3803            | <b>0.0197</b> | 631 ± 27    | 605 ± 56    | 546 ± 25    | 456 ± 34   |
| 221517_s_at | CRSP6   | cofactor required for Sp1 transcriptional activation 6 | -0.1315          | <b>0.0491</b>     | <b>-0.0479</b>   | -0.4372           | 0.0973        | 315 ± 24    | 267 ± 28    | 228 ± 17    | 201 ± 54   |
| 205489_at   | CRYM    | crystallin, mu                                         | -0.1000          | <b>0.0105</b>     | 0.2397           | 0.2176            | 0.0930        | 2634 ± 628  | 2301 ± 413  | 2238 ± 440  | 944 ± 114  |
| 202950_at   | CRYZ    | crystallin, zeta                                       | <b>-0.0306</b>   | <b>0.0259</b>     | 0.3843           | -0.0611           | <b>0.0128</b> | 538 ± 53    | 502 ± 70    | 399 ± 49    | 268 ± 34   |
| 208660_at   | CS      | citrate synthase                                       | -0.1882          | <b>0.0473</b>     | -0.1043          | 0.3386            | 0.3413        | 2407 ± 105  | 2485 ± 164  | 2251 ± 147  | 2168 ± 97  |
| 201112_s_at | CSE1L   | CSE1 chromosome segregation 1-like                     | <b>-0.0247</b>   | <b>0.0095</b>     | <b>-0.0112</b>   | <b>0.0262</b>     | <b>0.0255</b> | 1033 ± 76   | 1145 ± 116  | 881 ± 60    | 779 ± 46   |
| 220768_s_at | CSNK1G3 | casein kinase 1, gamma 3                               | <b>-0.0100</b>   | <b>0.0104</b>     | <b>-0.0453</b>   | 0.2267            | <b>0.0277</b> | 368 ± 22    | 297 ± 25    | 303 ± 13    | 271 ± 30   |
| 212072_s_at | CSNK2A1 | casein kinase 2, alpha 1 polypeptide                   | -0.0859          | <b>0.0012</b>     | 0.2070           | -0.2860           | <b>0.0128</b> | 780 ± 53    | 794 ± 56    | 682 ± 37    | 550 ± 64   |
| 206075_s_at | CSNK2A1 | casein kinase 2, alpha 1 polypeptide                   | <b>-0.0231</b>   | <b>0.0028</b>     | -0.3590          | -0.2245           | <b>0.0423</b> | 431 ± 17    | 386 ± 20    | 359 ± 40    | 289 ± 47   |

| Probe set   | Name          | Description                                                   | NFT <sub>0</sub> | MMSE <sub>0</sub> | NFT <sub>1</sub> | MMSE <sub>1</sub> | ANOVA         | Control    | Incipient  | Moderate   | Severe     |
|-------------|---------------|---------------------------------------------------------------|------------------|-------------------|------------------|-------------------|---------------|------------|------------|------------|------------|
| 205143_at   | CSPG3         | chondroitin sulfate proteoglycan 3                            | -0.1035          | <b>0.0019</b>     | 0.0768           | -0.3863           | <b>0.0046</b> | 3646 ± 284 | 4419 ± 467 | 3632 ± 352 | 2396 ± 230 |
| 39966_at    | CSPG5         | chondroitin sulfate proteoglycan 5                            | <b>-0.0179</b>   | <b>0.0012</b>     | -0.2967          | <b>0.0206</b>     | <b>0.0009</b> | 4013 ± 159 | 4238 ± 394 | 4309 ± 330 | 2498 ± 302 |
| 205373_at   | CTNNA2        | catenin , alpha 2                                             | -0.0821          | <b>0.0434</b>     | 0.2489           | -0.3519           | 0.1447        | 1375 ± 150 | 1337 ± 202 | 1309 ± 249 | 772 ± 182  |
| 207614_s_at | CUL1          | cullin 1                                                      | -0.0760          | <b>0.0394</b>     | -0.0723          | 0.1441            | <b>0.0406</b> | 749 ± 47   | 605 ± 54   | 547 ± 30   | 557 ± 84   |
| 203078_at   | CUL2          | cullin 2                                                      | -0.1008          | <b>0.0283</b>     | <b>0.0280</b>    | 0.1258            | 0.2557        | 134 ± 20   | 158 ± 25   | 101 ± 20   | 101 ± 26   |
| 203079_s_at | CUL2          | cullin 2                                                      | <b>-0.0181</b>   | <b>0.0129</b>     | -0.3447          | 0.0778            | <b>0.0190</b> | 431 ± 28   | 382 ± 40   | 331 ± 17   | 304 ± 29   |
| 218002_s_at | CXCL14        | chemokine ligand 14                                           | <b>-0.0304</b>   | <b>0.0177</b>     | -0.2114          | <b>0.0005</b>     | 0.0835        | 1243 ± 171 | 1009 ± 147 | 827 ± 167  | 634 ± 145  |
| 201828_x_at | CXX1          | CAAX box 1                                                    | <b>-0.0429</b>   | 0.0994            | 0.3519           | 0.0817            | 0.3273        | 6288 ± 695 | 6106 ± 505 | 4886 ± 517 | 5410 ± 580 |
| 201066_at   | CYC1          | cytochrome c-1                                                | <b>-0.0331</b>   | 0.2562            | -0.4541          | -0.4342           | 0.2587        | 1110 ± 98  | 1027 ± 71  | 858 ± 65   | 975 ± 116  |
| 204716_at   | D10S170       | DNA segment on chromosome 10 170                              | <b>-0.0329</b>   | 0.0615            | 0.2104           | 0.2419            | 0.2427        | 434 ± 16   | 415 ± 32   | 417 ± 31   | 347 ± 45   |
| 208872_s_at | D5S346        | DNA segment, single copy probe LNS-CAI/LNS-CAII               | <b>-0.0067</b>   | <b>0.0407</b>     | -0.1455          | 0.4736            | 0.1083        | 681 ± 58   | 591 ± 54   | 524 ± 46   | 495 ± 68   |
| 208873_s_at | D5S346        | DNA segment, single copy probe LNS-CAI/LNS-CAII               | <b>-0.0002</b>   | <b>0.0003</b>     | -0.1752          | 0.2336            | 0.1670        | 4398 ± 307 | 3919 ± 387 | 3731 ± 291 | 3318 ± 379 |
| 209763_at   | dA141H5.1     | similar to neuralin 1                                         | <b>-0.0130</b>   | <b>0.0018</b>     | -0.2837          | 0.2859            | <b>0.0029</b> | 576 ± 33   | 505 ± 54   | 436 ± 44   | 335 ± 38   |
| 201624_at   | DARS          | aspartyl-tRNA synthetase                                      | <b>-0.0207</b>   | 0.1639            | -0.4876          | -0.1835           | 0.3841        | 760 ± 63   | 748 ± 104  | 660 ± 71   | 573 ± 98   |
| 205818_at   | DBCCR1        | deleted in bladder cancer chromosome region candidate 1       | <b>-0.0512</b>   | <b>0.0406</b>     | 0.4569           | 0.2781            | 0.2044        | 1115 ± 137 | 957 ± 154  | 780 ± 112  | 791 ± 96   |
| 218482_at   | DC6           | DC6 protein                                                   | <b>-0.0211</b>   | <b>0.0050</b>     | -0.3244          | 0.4498            | <b>0.0158</b> | 579 ± 55   | 545 ± 64   | 470 ± 33   | 335 ± 55   |
| 201894_s_at | DCN           | decorin                                                       | <b>-0.0235</b>   | 0.4632            | 0.3054           | <b>-0.0087</b>    | 0.2726        | 552 ± 36   | 649 ± 58   | 554 ± 72   | 484 ± 51   |
| 200932_s_at | DCTN2         | dynactin 2                                                    | <b>-0.0167</b>   | <b>0.0102</b>     | -0.4887          | -0.2150           | <b>0.0238</b> | 1164 ± 85  | 1134 ± 92  | 994 ± 61   | 814 ± 62   |
| 208675_s_at | DDOST         | dolichyl-diphosphooligosaccharide-protein glycosyltransferase | <b>-0.0015</b>   | <b>0.0043</b>     | -0.0671          | 0.4050            | <b>0.0313</b> | 835 ± 61   | 858 ± 98   | 730 ± 48   | 567 ± 44   |
| 202929_s_at | DDT           | D-dopachrome tautomerase                                      | <b>-0.0197</b>   | 0.1039            | 0.3307           | -0.2800           | 0.1649        | 351 ± 26   | 390 ± 42   | 301 ± 22   | 241 ± 79   |
| 201241_at   | DDX1          | DEAD/H box polypeptide 1                                      | <b>-0.0266</b>   | <b>0.0002</b>     | 0.4827           | -0.2906           | <b>0.0171</b> | 1351 ± 68  | 1201 ± 145 | 980 ± 73   | 936 ± 112  |
| 200033_at   | DDX5          | DEAD/H box polypeptide 5                                      | <b>-0.0471</b>   | 0.5049            | <b>-0.0209</b>   | 0.3871            | 0.6756        | 4816 ± 211 | 4787 ± 203 | 4361 ± 380 | 4314 ± 594 |
| 209407_s_at | DEAF1         | deformed epidermal autoregulatory factor 1                    | <b>-0.0458</b>   | 0.0854            | <b>-0.0015</b>   | <b>0.0319</b>     | 0.1909        | 1447 ± 115 | 1121 ± 108 | 1175 ± 121 | 1145 ± 139 |
| 207431_s_at | DEGS          | degenerative spermatocyte homolog, lipid desaturase           | <b>-0.0142</b>   | 0.1882            | -0.4856          | -0.1448           | 0.2535        | 343 ± 28   | 413 ± 54   | 333 ± 42   | 278 ± 53   |
| 220482_s_at | DELGEF        | deafness locus associated putative guanine nucleotide exch.   | <b>-0.0037</b>   | 0.1192            | 0.1919           | -0.4365           | <b>0.0541</b> | 161 ± 12   | 154 ± 20   | 168 ± 18   | 101 ± 20   |
| 216307_at   | DGKB          | diacylglycerol kinase, beta 90kDa                             | -0.3368          | <b>0.0304</b>     | -0.3492          | 0.1441            | 0.2894        | 191 ± 11   | 202 ± 31   | 188 ± 23   | 142 ± 10   |
| 203816_at   | DGUOK         | deoxyguanosine kinase                                         | <b>-0.0023</b>   | <b>0.0053</b>     | 0.3178           | 0.2036            | <b>0.0005</b> | 196 ± 21   | 228 ± 14   | 162 ± 22   | 72 ± 28    |
| 201790_s_at | DHCR7         | 7-dehydrocholesterol reductase                                | <b>-0.0050</b>   | 0.1341            | -0.1588          | 0.4425            | 0.2613        | 676 ± 80   | 723 ± 98   | 565 ± 26   | 513 ± 92   |
| 203700_s_at | DIO2          | deiodinase, iodothyronine, type II                            | <b>-0.0174</b>   | <b>0.0025</b>     | 0.3598           | -0.4399           | <b>0.0202</b> | 533 ± 50   | 497 ± 39   | 404 ± 46   | 332 ± 40   |
| 219619_at   | Di-Ras2       | Di-Ras2                                                       | <b>-0.0150</b>   | <b>0.0403</b>     | 0.2672           | -0.3548           | <b>0.0373</b> | 4346 ± 475 | 4114 ± 441 | 3577 ± 370 | 2499 ± 486 |
| 214193_s_at | DJ434O14.5    | novel putative prot. similar to YIL091C                       | <b>-0.0193</b>   | <b>0.0030</b>     | -0.2614          | 0.1317            | 0.1003        | 211 ± 13   | 202 ± 14   | 184 ± 14   | 163 ± 14   |
| 203427_at   | DKFZP547E2110 | DKFZP547E2110 protein                                         | <b>-0.0279</b>   | 0.2871            | -0.0684          | -0.3776           | 0.3995        | 650 ± 23   | 661 ± 59   | 667 ± 42   | 559 ± 67   |
| 203428_s_at | DKFZP547E2110 | DKFZP547E2110 protein                                         | -0.2265          | <b>0.0100</b>     | 0.4096           | <b>0.0338</b>     | 0.1291        | 273 ± 22   | 269 ± 28   | 220 ± 19   | 214 ± 9    |
| 217948_at   | DKFZP564B147  | DKFZP564B147 protein                                          | <b>-0.0104</b>   | 0.1534            | -0.0639          | 0.1180            | <b>0.0206</b> | 351 ± 31   | 253 ± 16   | 249 ± 14   | 278 ± 25   |
| 209708_at   | DKFZP564G202  | DKFZP564G202 protein                                          | <b>-0.0376</b>   | 0.1774            | -0.4433          | 0.4103            | 0.1341        | 493 ± 50   | 432 ± 57   | 342 ± 33   | 385 ± 36   |
| 221896_s_at | DKFZP564K247  | DKFZP564K247 protein                                          | <b>-0.0207</b>   | <b>0.0055</b>     | -0.2442          | 0.2262            | <b>0.0216</b> | 2539 ± 308 | 2101 ± 247 | 1687 ± 128 | 1533 ± 124 |
| 210006_at   | DKFZP564O243  | DKFZP564O243 protein                                          | <b>-0.0371</b>   | 0.0731            | -0.4892          | 0.3331            | 0.2586        | 1022 ± 110 | 863 ± 47   | 804 ± 85   | 791 ± 102  |
| 209300_s_at | DKFZP566B183  | DKFZP566B183 protein                                          | <b>-0.0013</b>   | <b>0.0408</b>     | 0.4924           | -0.2372           | <b>0.0223</b> | 1208 ± 178 | 1003 ± 205 | 645 ± 66   | 601 ± 82   |
| 216338_s_at | DKFZP566C243  | DKFZP566C243 protein                                          | -0.1978          | <b>0.0176</b>     | -0.1042          | <b>0.0320</b>     | <b>0.0400</b> | 426 ± 21   | 314 ± 40   | 332 ± 31   | 285 ± 44   |



| Probe set   | Name          | Description                                           | NFT <sub>0</sub> | MMSE <sub>0</sub> | NFT <sub>1</sub> | MMSE <sub>1</sub> | ANOVA         | Control    | Incipient  | Moderate   | Severe     |
|-------------|---------------|-------------------------------------------------------|------------------|-------------------|------------------|-------------------|---------------|------------|------------|------------|------------|
| 209001_s_at | DKFZP566D193  | DKFZP566D193 protein                                  | <b>-0.0071</b>   | <b>0.0001</b>     | 0.4896           | 0.0832            | <b>0.0249</b> | 3677 ± 100 | 3677 ± 218 | 3001 ± 205 | 3240 ± 192 |
| 207170_s_at | DKFZP586A011  | cervical cancer 1 protooncogene                       | <b>-0.0064</b>   | <b>0.0354</b>     | -0.3168          | 0.1824            | <b>0.0042</b> | 1107 ± 57  | 1080 ± 82  | 919 ± 76   | 747 ± 36   |
| 212453_at   | DKFZP586B0923 | DKFZP586B0923 protein                                 | <b>-0.0487</b>   | <b>0.0263</b>     | -0.2710          | 0.2155            | 0.0693        | 1145 ± 108 | 1006 ± 120 | 769 ± 76   | 822 ± 133  |
| 213617_s_at | DKFZP586M1523 | DKFZP586M1523 protein                                 | <b>-0.0217</b>   | <b>0.0181</b>     | 0.4689           | 0.2180            | 0.2533        | 434 ± 33   | 405 ± 43   | 353 ± 58   | 323 ± 26   |
| 201863_at   | DKFZP586O0120 | DKFZP586O0120 protein                                 | -0.0914          | <b>0.0064</b>     | 0.2499           | 0.4905            | <b>0.0453</b> | 910 ± 21   | 955 ± 53   | 829 ± 48   | 805 ± 14   |
| 213149_at   | DLAT          | dihydrolipoamide S-acetyltransferase                  | -0.3097          | <b>0.0266</b>     | 0.4711           | -0.4529           | 0.2396        | 465 ± 44   | 418 ± 69   | 438 ± 16   | 316 ± 68   |
| 209095_at   | DLD           | dihydrolipoamide dehydrogenase                        | <b>-0.0206</b>   | <b>0.0009</b>     | <b>-0.0275</b>   | 0.2242            | 0.1371        | 1235 ± 225 | 1096 ± 130 | 916 ± 101  | 690 ± 143  |
| 206253_at   | DLG2          | discs, large homolog 2, chapsyn-110                   | -0.0954          | <b>0.0038</b>     | -0.1550          | 0.4551            | <b>0.0449</b> | 195 ± 21   | 191 ± 11   | 139 ± 17   | 134 ± 20   |
| 206489_s_at | DLGAP1        | discs, large homolog-associated protein 1             | -0.0651          | <b>0.0174</b>     | -0.4121          | 0.2295            | <b>0.0324</b> | 125 ± 21   | 99 ± 14    | 61 ± 14    | 71 ± 6     |
| 210227_at   | DLGAP2        | discs, large homolog-associated protein 2             | <b>-0.0190</b>   | <b>0.0036</b>     | -0.3302          | 0.3555            | <b>0.0238</b> | 1305 ± 73  | 1150 ± 147 | 1015 ± 128 | 789 ± 76   |
| 203881_s_at | DMD           | dystrophin                                            | <b>-0.0066</b>   | <b>0.0055</b>     | -0.3755          | 0.1129            | <b>0.0112</b> | 1080 ± 110 | 932 ± 42   | 765 ± 63   | 701 ± 69   |
| 200881_s_at | DNAJA1        | DnaJ homolog, subfamily A, member 1                   | <b>-0.0115</b>   | 0.0951            | <b>-0.0059</b>   | 0.4265            | 0.0987        | 1620 ± 249 | 1215 ± 132 | 1296 ± 172 | 903 ± 68   |
| 200880_at   | DNAJA1        | DnaJ homolog, subfamily A, member 1                   | <b>-0.0185</b>   | 0.3614            | -0.1832          | -0.3597           | 0.4671        | 2897 ± 185 | 2620 ± 261 | 2488 ± 195 | 2487 ± 219 |
| 202842_s_at | DNAJB9        | DnaJ homolog, subfamily B, member 9                   | <b>-0.0185</b>   | <b>0.0009</b>     | 0.3331           | 0.1874            | <b>0.0114</b> | 1925 ± 161 | 1839 ± 66  | 1375 ± 95  | 1469 ± 139 |
| 204720_s_at | DNAJC6        | DnaJ homolog, subfamily C, member 6                   | <b>-0.0200</b>   | 0.0663            | -0.1231          | -0.2312           | 0.1939        | 5519 ± 319 | 5305 ± 691 | 5030 ± 218 | 4098 ± 632 |
| 212490_at   | DNAJC8        | DnaJ homolog, subfamily C, member 8                   | -0.2041          | <b>0.0406</b>     | 0.2941           | <b>0.0026</b>     | <b>0.0437</b> | 276 ± 20   | 215 ± 16   | 261 ± 22   | 200 ± 22   |
| 211928_at   | DNCH1         | dynein, cytoplasmic, heavy polypeptide 1              | -0.2795          | <b>0.0277</b>     | -0.1075          | 0.3555            | 0.0799        | 3656 ± 126 | 3325 ± 273 | 3588 ± 248 | 2797 ± 306 |
| 205348_s_at | DNCI1         | dynein, cytoplasmic, intermediate polypeptide 1       | <b>-0.0206</b>   | <b>0.0459</b>     | -0.3530          | 0.3640            | <b>0.0100</b> | 2489 ± 291 | 2366 ± 267 | 1631 ± 112 | 1493 ± 153 |
| 211684_s_at | DNCI2         | dynein, cytoplasmic, intermediate polypeptide 2       | <b>-0.0399</b>   | 0.3712            | -0.1479          | -0.1333           | 0.2865        | 2985 ± 92  | 2999 ± 331 | 3062 ± 257 | 2484 ± 172 |
| 217976_s_at | DNCL11        | dynein, cytoplasmic, light intermediate polypeptide 1 | <b>-0.0059</b>   | <b>0.0020</b>     | -0.0611          | 0.2493            | 0.1058        | 545 ± 67   | 465 ± 58   | 352 ± 48   | 347 ± 86   |
| 217918_at   | DNL2A         | dynein light chain 2A                                 | -0.2113          | <b>0.0387</b>     | -0.1272          | -0.4797           | 0.1685        | 5575 ± 232 | 5027 ± 711 | 4537 ± 355 | 4209 ± 500 |
| 203105_s_at | DNM1L         | dynamamin 1-like                                      | <b>-0.0152</b>   | <b>0.0028</b>     | -0.1914          | 0.3169            | <b>0.0031</b> | 403 ± 27   | 351 ± 24   | 292 ± 10   | 272 ± 35   |
| 213482_at   | DOCK3         | dedicator of cyto-kinesis 3                           | <b>-0.0156</b>   | <b>0.0137</b>     | <b>-0.0392</b>   | -0.4163           | <b>0.0241</b> | 521 ± 80   | 421 ± 74   | 350 ± 43   | 202 ± 74   |
| 203258_at   | DRAP1         | DR1-associated protein 1                              | <b>-0.0342</b>   | <b>0.0142</b>     | 0.1622           | 0.1439            | <b>0.0287</b> | 762 ± 50   | 617 ± 106  | 573 ± 57   | 419 ± 82   |
| 204751_x_at | DSC2          | desmocollin 2                                         | <b>-0.0377</b>   | -0.8438           | -0.2203          | 0.0944            | 0.7515        | 100 ± 11   | 94 ± 10    | 84 ± 7     | 101 ± 20   |
| 203498_at   | DSCR1L1       | Down syndrome critical region gene 1-like 1           | -0.1169          | <b>0.0130</b>     | -0.4289          | 0.2339            | 0.0768        | 1848 ± 291 | 1701 ± 249 | 1650 ± 226 | 971 ± 95   |
| 203405_at   | DSCR2         | Down syndrome critical region gene 2                  | <b>-0.0060</b>   | 0.1123            | 0.3201           | 0.2474            | 0.2319        | 427 ± 28   | 423 ± 26   | 349 ± 26   | 381 ± 42   |
| 221689_s_at | DSCR5         | Down syndrome critical region gene 5                  | <b>-0.0023</b>   | 0.1583            | -0.4931          | -0.3598           | 0.0686        | 828 ± 44   | 892 ± 57   | 701 ± 42   | 772 ± 56   |
| 202276_at   | DSS1          | Deleted in split-hand/split-foot 1 region             | <b>-0.0445</b>   | 0.3622            | 0.1571           | -0.3598           | 0.6194        | 524 ± 33   | 524 ± 14   | 456 ± 21   | 486 ± 72   |
| 209457_at   | DUSP5         | dual specificity phosphatase 5                        | <b>-0.0034</b>   | 0.2196            | -0.0655          | 0.1422            | <b>0.0493</b> | 291 ± 32   | 245 ± 27   | 153 ± 30   | 229 ± 47   |
| 208892_s_at | DUSP6         | dual specificity phosphatase 6                        | <b>-0.0421</b>   | 0.0795            | -0.4189          | 0.3208            | 0.1768        | 640 ± 74   | 541 ± 36   | 539 ± 75   | 425 ± 56   |
| 208891_at   | DUSP6         | dual specificity phosphatase 6                        | <b>-0.0327</b>   | <b>0.0259</b>     | -0.1200          | -0.3969           | <b>0.0438</b> | 1130 ± 189 | 832 ± 37   | 752 ± 113  | 564 ± 118  |
| 202348_s_at | DYT1          | dystonia 1, torsion                                   | -0.1608          | <b>0.0200</b>     | 0.4272           | 0.2288            | 0.1102        | 366 ± 32   | 362 ± 31   | 277 ± 23   | 298 ± 34   |
| 204557_s_at | DZIP1         | zinc-finger protein DZIP1                             | <b>-0.0003</b>   | <b>0.0027</b>     | -0.2519          | 0.3703            | <b>0.0327</b> | 625 ± 28   | 538 ± 83   | 593 ± 62   | 389 ± 39   |
| 220942_x_at | E2IG5         | hypothetical protein, estradiol-induced               | <b>-0.0028</b>   | <b>0.0199</b>     | -0.1262          | 0.1473            | <b>0.0098</b> | 1915 ± 143 | 1728 ± 181 | 1292 ± 104 | 1290 ± 172 |
| 208833_s_at | E46L          | like mouse brain protein E46                          | <b>-0.0203</b>   | <b>0.0074</b>     | -0.3761          | -0.4133           | <b>0.0077</b> | 3421 ± 300 | 2758 ± 228 | 2011 ± 182 | 2483 ± 358 |
| 202735_at   | EBP           | emopamil binding protein                              | -0.4425          | <b>0.0342</b>     | <b>0.0171</b>    | -0.1000           | 0.1573        | 185 ± 17   | 188 ± 15   | 179 ± 13   | 136 ± 22   |
| 200789_at   | ECH1          | enoyl Coenzyme A hydratase 1, peroxisomal             | <b>-0.0045</b>   | 0.0751            | <b>-0.0010</b>   | 0.1452            | 0.2163        | 795 ± 40   | 728 ± 41   | 688 ± 26   | 651 ± 85   |
| 219787_s_at | ECT2          | epithelial cell transforming sequence 2 oncogene      | <b>-0.0435</b>   | 0.6363            | 0.2693           | -0.2427           | 0.4048        | 155 ± 20   | 155 ± 12   | 118 ± 20   | 147 ± 15   |

| Probe set   | Name   | Description                                           | NFT <sub>0</sub> | MMSE <sub>0</sub> | NFT <sub>1</sub> | MMSE <sub>1</sub> | ANOVA         | Control     | Incipient   | Moderate    | Severe      |
|-------------|--------|-------------------------------------------------------|------------------|-------------------|------------------|-------------------|---------------|-------------|-------------|-------------|-------------|
| 204642_at   | EDG1   | endothelial differentiation, sphingolipid GPCR 1      | -0.1163          | <b>0.0444</b>     | 0.3601           | -0.3498           | <b>0.0494</b> | 975 ± 67    | 1023 ± 124  | 979 ± 87    | 687 ± 60    |
| 208399_s_at | EDN3   | endothelin 3                                          | -0.0572          | <b>0.0134</b>     | 0.0593           | -0.4652           | 0.0590        | 144 ± 36    | 162 ± 23    | 74 ± 19     | 71 ± 24     |
| 204905_s_at | EEF1E1 | eukaryotic translation elongation factor 1 epsilon 1  | <b>-0.0243</b>   | 0.1460            | -0.4260          | 0.4063            | 0.3245        | 515 ± 45    | 440 ± 62    | 392 ± 45    | 393 ± 71    |
| 203354_s_at | EFA6R  | ADP-ribosylation factor guanine nucleotide factor 6   | <b>-0.0024</b>   | <b>0.0004</b>     | -0.1873          | 0.1572            | 0.0574        | 595 ± 43    | 624 ± 138   | 507 ± 62    | 303 ± 39    |
| 202668_at   | EFNB2  | ephrin-B2                                             | <b>-0.0017</b>   | <b>0.0221</b>     | <b>-0.0174</b>   | 0.2218            | <b>0.0004</b> | 1863 ± 123  | 1516 ± 91   | 1329 ± 68   | 1216 ± 99   |
| 201632_at   | EIF2B1 | eukaryotic translation initiation factor 2B1 alpha    | <b>-0.0165</b>   | 0.1292            | <b>-0.0242</b>   | 0.1385            | 0.1055        | 1099 ± 39   | 994 ± 24    | 897 ± 73    | 920 ± 85    |
| 218488_at   | EIF2B3 | eukaryotic translation initiation factor 2B, 3 gamma  | <b>-0.0392</b>   | <b>0.0341</b>     | 0.3706           | 0.3375            | <b>0.0271</b> | 443 ± 41    | 406 ± 23    | 303 ± 13    | 328 ± 50    |
| 201142_at   | EIF2S1 | eukaryotic translation initiation factor 2 1 alpha    | <b>-0.0213</b>   | <b>0.0428</b>     | -0.1048          | 0.1164            | 0.2022        | 661 ± 68    | 623 ± 74    | 527 ± 59    | 476 ± 49    |
| 200005_at   | EIF3S7 | eukaryotic translation initiation factor 3, 7 zeta    | <b>-0.0430</b>   | 0.1540            | -0.4749          | -0.3078           | 0.1272        | 1140 ± 47   | 1175 ± 66   | 1128 ± 51   | 978 ± 55    |
| 208290_s_at | EIF5   | eukaryotic translation initiation factor 5            | <b>-0.0247</b>   | <b>0.0418</b>     | 0.1212           | <b>-0.0157</b>    | 0.1245        | 492 ± 82    | 355 ± 52    | 329 ± 40    | 294 ± 44    |
| 206051_at   | ELAVL4 | ELAV-like 4                                           | -0.0733          | <b>0.0090</b>     | -0.3688          | 0.2806            | 0.0864        | 2362 ± 351  | 1887 ± 327  | 1753 ± 292  | 1205 ± 197  |
| 204513_s_at | ELMO1  | engulfment and cell motility 1                        | <b>-0.0472</b>   | 0.3646            | -0.4274          | -0.3889           | 0.5308        | 2231 ± 168  | 2110 ± 298  | 1841 ± 177  | 1803 ± 341  |
| 221528_s_at | ELMO2  | engulfment and cell motility 2                        | -0.2807          | <b>0.0498</b>     | -0.3200          | <b>0.0314</b>     | 0.3301        | 828 ± 36    | 772 ± 70    | 732 ± 67    | 662 ± 86    |
| 213712_at   | ELOVL2 | elongation of very long chain fatty acids -like 2     | <b>-0.0071</b>   | <b>0.0102</b>     | -0.2900          | 0.2102            | 0.0564        | 415 ± 14    | 449 ± 74    | 395 ± 60    | 244 ± 46    |
| 219532_at   | ELOVL4 | elongation of very long chain fatty acids -like 4     | -0.0607          | <b>0.0470</b>     | 0.4544           | -0.1750           | 0.3105        | 566 ± 64    | 563 ± 75    | 512 ± 81    | 369 ± 99    |
| 201341_at   | ENC1   | ectodermal-neural cortex                              | <b>-0.0277</b>   | <b>0.0251</b>     | -0.3999          | -0.2935           | 0.1253        | 9931 ± 1082 | 8003 ± 1360 | 5446 ± 1365 | 5447 ± 1794 |
| 201313_at   | ENO2   | enolase 2,                                            | <b>-0.0079</b>   | <b>0.0003</b>     | 0.1580           | 0.2694            | 0.0973        | 3317 ± 330  | 3654 ± 583  | 2571 ± 323  | 2190 ± 436  |
| 202596_at   | ENSA   | endosulfine alpha                                     | <b>-0.0045</b>   | <b>0.0020</b>     | -0.1906          | 0.0977            | <b>0.0021</b> | 1892 ± 235  | 1930 ± 187  | 1667 ± 152  | 821 ± 87    |
| 206191_at   | ENTPD3 | ectonucleoside triphosphate diphosphohydrolase 3      | <b>-0.0028</b>   | <b>0.0209</b>     | 0.4758           | -0.3541           | <b>0.0071</b> | 782 ± 78    | 642 ± 89    | 465 ± 31    | 476 ± 54    |
| 204505_s_at | EPB49  | erythrocyte membrane protein band 4.9                 | -0.0769          | <b>0.0035</b>     | -0.2731          | 0.3281            | <b>0.0213</b> | 1621 ± 180  | 1485 ± 155  | 1519 ± 132  | 965 ± 71    |
| 206114_at   | EPHA4  | EphA4                                                 | -0.0806          | <b>0.0436</b>     | -0.3691          | -0.2538           | 0.2281        | 579 ± 63    | 498 ± 82    | 382 ± 39    | 399 ± 117   |
| 206852_at   | EPHA7  | EphA7                                                 | -0.0910          | <b>0.0373</b>     | 0.2443           | -0.3807           | <b>0.0280</b> | 66 ± 7      | 76 ± 21     | 31 ± 3      | 37 ± 9      |
| 209589_s_at | EPHB2  | EphB2                                                 | -0.0852          | <b>0.0341</b>     | 0.3128           | 0.0661            | 0.2759        | 176 ± 17    | 185 ± 29    | 172 ± 25    | 123 ± 10    |
| 217886_at   | EPS15  | epidermal growth factor receptor pathway substrate 15 | <b>-0.0406</b>   | 0.0624            | 0.4171           | 0.4492            | <b>0.0368</b> | 2459 ± 163  | 2233 ± 129  | 1809 ± 102  | 2056 ± 221  |
| 209009_at   | ESD    | esterase D/formylglutathione hydrolase                | <b>-0.0060</b>   | 0.0958            | -0.3487          | -0.1029           | 0.1337        | 2421 ± 100  | 2433 ± 275  | 2068 ± 72   | 1935 ± 210  |
| 201931_at   | ETFA   | electron-transfer-flavoprotein, alpha polypeptide     | <b>-0.0019</b>   | <b>0.0017</b>     | -0.3895          | 0.2345            | <b>0.0249</b> | 581 ± 34    | 579 ± 19    | 481 ± 30    | 459 ± 42    |
| 201329_s_at | ETS2   | v-ets erythroblastosis virus E26 oncogene homolog 2   | -0.0614          | <b>0.0132</b>     | 0.4498           | -0.2522           | <b>0.0077</b> | 276 ± 10    | 312 ± 27    | 290 ± 20    | 208 ± 11    |
| 205756_s_at | F8     | coagulation factor VIII, procoagulant component       | <b>-0.0057</b>   | <b>0.0081</b>     | -0.3027          | 0.1887            | <b>0.0388</b> | 750 ± 29    | 728 ± 47    | 687 ± 44    | 576 ± 47    |
| 203274_at   | F8A    | coagulation factor VIII-associated                    | <b>-0.0104</b>   | <b>0.0071</b>     | -0.1157          | 0.1640            | <b>0.0371</b> | 1569 ± 149  | 1331 ± 153  | 1151 ± 71   | 1014 ± 136  |
| 205738_s_at | FABP3  | fatty acid binding protein 3, muscle and heart        | -0.3339          | <b>0.0366</b>     | <b>0.0435</b>    | -0.4552           | 0.3537        | 322 ± 37    | 323 ± 39    | 272 ± 19    | 250 ± 36    |
| 205030_at   | FABP7  | fatty acid binding protein 7, brain                   | <b>-0.0052</b>   | <b>0.0103</b>     | -0.4668          | -0.4013           | <b>0.0237</b> | 3122 ± 423  | 2424 ± 336  | 2602 ± 474  | 1232 ± 104  |
| 205029_s_at | FABP7  | fatty acid binding protein 7, brain                   | <b>-0.0053</b>   | <b>0.0094</b>     | -0.3508          | 0.4110            | <b>0.0517</b> | 689 ± 100   | 643 ± 110   | 534 ± 99    | 286 ± 101   |
| 201660_at   | FACL3  | fatty-acid-Coenzyme A ligase, long-chain 3            | <b>-0.0220</b>   | 0.0749            | 0.1956           | 0.4906            | 0.2314        | 2717 ± 258  | 2589 ± 54   | 2240 ± 163  | 2228 ± 212  |
| 201662_s_at | FACL3  | fatty-acid-Coenzyme A ligase, long-chain 3            | <b>-0.0057</b>   | <b>0.0164</b>     | -0.4662          | -0.2358           | <b>0.0429</b> | 973 ± 113   | 876 ± 95    | 747 ± 86    | 569 ± 90    |
| 204283_at   | FARS1  | phenylalanine-tRNA synthetase                         | <b>-0.0108</b>   | 0.1441            | 0.4891           | 0.3153            | 0.3641        | 202 ± 18    | 187 ± 14    | 159 ± 21    | 162 ± 25    |
| 214436_at   | FBXL2  | F-box and leucine-rich repeat protein 2               | -0.0577          | <b>0.0035</b>     | -0.3235          | -0.4576           | <b>0.0286</b> | 883 ± 55    | 796 ± 63    | 737 ± 66    | 625 ± 44    |
| 212231_at   | FBXO21 | F-box only protein 21                                 | <b>-0.0429</b>   | 0.0590            | -0.4226          | 0.4384            | 0.3762        | 1295 ± 70   | 1346 ± 151  | 1174 ± 130  | 1057 ± 127  |
| 212229_s_at | FBXO21 | F-box only protein 21                                 | <b>-0.0478</b>   | 0.2087            | 0.4360           | -0.3589           | 0.5363        | 1872 ± 110  | 1832 ± 216  | 1614 ± 78   | 1612 ± 220  |
| 218432_at   | FBXO3  | F-box only protein 3                                  | <b>-0.0224</b>   | <b>0.0394</b>     | -0.4570          | 0.4527            | <b>0.0373</b> | 864 ± 74    | 786 ± 110   | 652 ± 59    | 544 ± 70    |

| Probe set   | Name     | Description                                                | NFT <sub>0</sub> | MMSE <sub>0</sub> | NFT <sub>1</sub> | MMSE <sub>1</sub> | ANOVA         | Control    | Incipient  | Moderate   | Severe     |
|-------------|----------|------------------------------------------------------------|------------------|-------------------|------------------|-------------------|---------------|------------|------------|------------|------------|
| 218751_s_at | FBXW7    | F-box and WD-40 domain protein 7                           | -0.1629          | <b>0.0077</b>     | 0.4004           | -0.4998           | <b>0.0474</b> | 1404 ± 220 | 1282 ± 188 | 1257 ± 193 | 613 ± 50   |
| 204232_at   | FCER1G   | Fc fragment of IgE, high affinity I                        | <b>-0.0190</b>   | 0.1445            | <b>-0.0266</b>   | 0.3763            | 0.1576        | 1292 ± 193 | 1037 ± 91  | 944 ± 58   | 921 ± 83   |
| 216950_s_at | FCGR1A   | Fc fragment of IgG, high affinity Ia, receptor for         | <b>-0.0493</b>   | 0.1039            | -0.1366          | -0.2976           | 0.3182        | 391 ± 75   | 380 ± 42   | 274 ± 43   | 264 ± 53   |
| 203116_s_at | FECH     | ferrochelatase                                             | <b>-0.0071</b>   | <b>0.0121</b>     | -0.4317          | 0.3058            | 0.1240        | 626 ± 34   | 652 ± 30   | 557 ± 29   | 550 ± 43   |
| 205110_s_at | FGF13    | fibroblast growth factor 13                                | <b>-0.0085</b>   | <b>0.0057</b>     | 0.3789           | 0.2858            | 0.0930        | 3707 ± 518 | 3219 ± 728 | 2269 ± 252 | 1974 ± 584 |
| 204380_s_at | FGFR3    | fibroblast growth factor receptor 3                        | <b>-0.0448</b>   | <b>0.0032</b>     | 0.3180           | 0.1246            | 0.0747        | 149 ± 23   | 142 ± 21   | 114 ± 25   | 68 ± 17    |
| 214170_x_at | FH       | fumarate hydratase                                         | <b>-0.0431</b>   | 0.2927            | 0.2571           | 0.2846            | 0.5091        | 936 ± 135  | 839 ± 83   | 729 ± 50   | 789 ± 106  |
| 203033_x_at | FH       | fumarate hydratase                                         | -0.1500          | <b>0.0499</b>     | 0.2010           | 0.2412            | 0.0923        | 651 ± 49   | 647 ± 46   | 497 ± 55   | 547 ± 47   |
| 206492_at   | FHIT     | fragile histidine triad gene                               | <b>-0.0156</b>   | 0.3462            | -0.4097          | -0.3905           | 0.4292        | 318 ± 18   | 323 ± 21   | 268 ± 24   | 277 ± 49   |
| 214505_s_at | FHL1     | four and a half LIM domains 1                              | -0.2094          | <b>0.0486</b>     | 0.3758           | <b>0.0415</b>     | 0.2475        | 526 ± 76   | 515 ± 94   | 329 ± 38   | 387 ± 96   |
| 202041_s_at | FIBP     | fibroblast growth factor intracellular binding protein     | <b>-0.0074</b>   | <b>0.0218</b>     | 0.2725           | <b>0.0184</b>     | <b>0.0441</b> | 1083 ± 84  | 1009 ± 58  | 952 ± 54   | 791 ± 51   |
| 209931_s_at | FKBP1B   | FK506 binding protein 1B, 12.6 kDa                         | -0.1172          | <b>0.0244</b>     | 0.1758           | -0.2405           | 0.1069        | 253 ± 38   | 263 ± 46   | 169 ± 21   | 161 ± 33   |
| 206857_s_at | FKBP1B   | FK506 binding protein 1B, 12.6 kDa                         | <b>-0.0499</b>   | <b>0.0081</b>     | -0.3837          | -0.4594           | 0.0794        | 2493 ± 299 | 2116 ± 186 | 1592 ± 196 | 1751 ± 286 |
| 218003_s_at | FKBP3    | FK506 binding protein 3, 25kDa                             | <b>-0.0397</b>   | <b>0.0035</b>     | 0.2565           | 0.1299            | <b>0.0349</b> | 1565 ± 83  | 1395 ± 113 | 1388 ± 74  | 1160 ± 99  |
| 219499_at   | FLJ10578 | Sec61 alpha form 2                                         | -0.0565          | <b>0.0499</b>     | 0.4279           | 0.3337            | 0.0856        | 463 ± 44   | 475 ± 48   | 354 ± 17   | 374 ± 30   |
| 220925_at   | FLJ21613 | hypothetical protein FLJ21613                              | -0.0668          | <b>0.0464</b>     | <b>0.0316</b>    | 0.3920            | 0.1755        | 339 ± 23   | 341 ± 18   | 294 ± 7    | 300 ± 20   |
| 218175_at   | FLJ22471 | limkain beta 2                                             | -0.1001          | <b>0.0187</b>     | 0.1973           | 0.1228            | 0.2449        | 7621 ± 380 | 8391 ± 909 | 7113 ± 632 | 6512 ± 599 |
| 204359_at   | FLRT2    | fibronectin leucine rich transmembrane protein 2           | -0.2159          | <b>0.0206</b>     | 0.4729           | 0.3440            | 0.0658        | 1599 ± 190 | 1325 ± 109 | 1140 ± 111 | 1063 ± 147 |
| 216442_x_at | FN1      | fibronectin 1                                              | -0.0914          | <b>0.0087</b>     | 0.3020           | 0.0574            | <b>0.0140</b> | 1830 ± 216 | 1506 ± 178 | 1684 ± 126 | 1005 ± 119 |
| 211719_x_at | FN1      | fibronectin 1                                              | -0.4478          | <b>0.0312</b>     | 0.1474           | 0.2829            | <b>0.0085</b> | 1456 ± 135 | 1400 ± 131 | 1617 ± 139 | 910 ± 64   |
| 212464_s_at | FN1      | fibronectin 1                                              | -0.0664          | <b>0.0478</b>     | 0.2867           | 0.2583            | <b>0.0145</b> | 1253 ± 164 | 1113 ± 99  | 1362 ± 150 | 672 ± 121  |
| 210495_x_at | FN1      | fibronectin 1                                              | <b>-0.0149</b>   | <b>0.0274</b>     | 0.3979           | 0.2650            | <b>0.0073</b> | 1804 ± 201 | 1582 ± 146 | 1640 ± 107 | 983 ± 132  |
| 206018_at   | FOXG1B   | forkhead box G1B                                           | <b>-0.0423</b>   | 0.0667            | -0.2474          | 0.4724            | 0.2127        | 3556 ± 390 | 3137 ± 432 | 2699 ± 248 | 2537 ± 398 |
| 215160_x_at | FRG1     | FSDH region gene 1                                         | <b>-0.0003</b>   | <b>0.0012</b>     | 0.4544           | 0.3929            | <b>0.0525</b> | 314 ± 13   | 326 ± 21   | 254 ± 31   | 260 ± 6    |
| 219170_at   | FSD1     | fibronectin type 3 and SPRY domain-containing protein      | -0.3995          | <b>0.0208</b>     | <b>-0.0207</b>   | 0.1889            | 0.1650        | 1016 ± 65  | 848 ± 121  | 823 ± 106  | 703 ± 101  |
| 208310_s_at | FSTL1    | follistatin-like 1                                         | <b>-0.0432</b>   | <b>0.0221</b>     | 0.3415           | 0.2117            | <b>0.0057</b> | 356 ± 28   | 350 ± 22   | 269 ± 25   | 234 ± 28   |
| 218373_at   | FTS      | fused toes homolog                                         | <b>-0.0200</b>   | <b>0.0172</b>     | -0.2737          | 0.3411            | 0.1226        | 1474 ± 182 | 1319 ± 135 | 1136 ± 123 | 937 ± 182  |
| 202838_at   | FUCA1    | fucosidase, alpha-L- 1, tissue                             | <b>-0.0248</b>   | 0.1201            | 0.0782           | -0.3119           | 0.2657        | 472 ± 33   | 505 ± 49   | 450 ± 44   | 368 ± 65   |
| 217897_at   | FXYD6    | FXYD domain containing ion transport regulator 6           | <b>-0.0485</b>   | <b>0.0032</b>     | 0.4744           | 0.3027            | <b>0.0432</b> | 3867 ± 465 | 2976 ± 473 | 2667 ± 450 | 2124 ± 184 |
| 220131_at   | FXYD7    | FXYD domain containing ion transport regulator 7           | <b>-0.0141</b>   | <b>0.0406</b>     | -0.4220          | 0.3561            | 0.0621        | 867 ± 103  | 991 ± 135  | 762 ± 108  | 544 ± 83   |
| 208841_s_at | G3BP2    | Ras-GTPase activating protein SH3 domain-binding protein 2 | <b>-0.0172</b>   | <b>0.0150</b>     | 0.1570           | 0.4393            | 0.1857        | 2239 ± 241 | 2019 ± 275 | 1669 ± 144 | 1563 ± 300 |
| 202812_at   | GAA      | glucosidase, alpha; acid                                   | <b>-0.0382</b>   | <b>0.0016</b>     | 0.1947           | 0.3817            | 0.1572        | 655 ± 18   | 655 ± 48   | 578 ± 37   | 551 ± 48   |
| 203146_s_at | GABBR1   | gamma-aminobutyric acid B receptor, 1                      | <b>-0.0057</b>   | <b>0.0160</b>     | -0.0682          | 0.0892            | <b>0.0075</b> | 4399 ± 399 | 5093 ± 551 | 4248 ± 492 | 2697 ± 208 |
| 207014_at   | GABRA2   | gamma-aminobutyric acid A receptor, alpha 2                | -0.0578          | <b>0.0232</b>     | 0.2467           | -0.3925           | 0.1946        | 528 ± 60   | 505 ± 113  | 402 ± 69   | 301 ± 78   |
| 205850_s_at | GABRB3   | gamma-aminobutyric acid A receptor, beta 3                 | <b>-0.0089</b>   | <b>0.0515</b>     | -0.3541          | <b>0.0264</b>     | 0.3529        | 157 ± 17   | 138 ± 24   | 111 ± 15   | 118 ± 26   |
| 205278_at   | GAD1     | glutamate decarboxylase 1                                  | <b>-0.0365</b>   | <b>0.0336</b>     | -0.1256          | 0.1361            | <b>0.0413</b> | 2633 ± 303 | 1633 ± 340 | 1469 ± 285 | 1401 ± 437 |
| 206780_at   | GAD2     | glutamate decarboxylase 2                                  | <b>-0.0456</b>   | <b>0.0014</b>     | 0.3795           | <b>0.0130</b>     | <b>0.0114</b> | 1015 ± 92  | 657 ± 96   | 458 ± 101  | 641 ± 156  |
| 204417_at   | GALC     | galactosylceramidase                                       | <b>-0.0243</b>   | 0.2171            | -0.4908          | -0.2056           | 0.3357        | 1253 ± 48  | 1293 ± 140 | 1110 ± 59  | 1123 ± 67  |
| 206435_at   | GALGT    | UDP-N-acetyl-alpha-D-galactosamine                         | <b>-0.0098</b>   | <b>0.0037</b>     | -0.2652          | 0.1629            | <b>0.0116</b> | 647 ± 76   | 501 ± 61   | 407 ± 47   | 388 ± 21   |

| Probe set   | Name      | Description                                             | NFT <sub>0</sub> | MMSE <sub>0</sub> | NFT <sub>1</sub> | MMSE <sub>1</sub> | ANOVA         | Control     | Incipient   | Moderate    | Severe      |
|-------------|-----------|---------------------------------------------------------|------------------|-------------------|------------------|-------------------|---------------|-------------|-------------|-------------|-------------|
| 204471_at   | GAP43     | growth associated protein 43                            | <b>-0.0463</b>   | <b>0.0129</b>     | -0.1279          | 0.3797            | <b>0.0320</b> | 2527 ± 419  | 1819 ± 315  | 1326 ± 238  | 1093 ± 388  |
| 217398_x_at | GAPD      | glyceraldehyde-3-phosphate dehydrogenase                | -0.1171          | <b>0.0443</b>     | -0.0564          | 0.4857            | <b>0.0218</b> | 7816 ± 1199 | 7119 ± 1731 | 3773 ± 1102 | 2382 ± 1718 |
| 213453_x_at | GAPD      | glyceraldehyde-3-phosphate dehydrogenase                | <b>-0.0047</b>   | <b>0.0148</b>     | 0.2472           | -0.3722           | <b>0.0306</b> | 14914 ± 757 | 4494 ± 1121 | 14695 ± 766 | 0854 ± 1435 |
| 201816_s_at | GBAS      | glioblastoma amplified sequence                         | <b>-0.0188</b>   | <b>0.0193</b>     | 0.3339           | -0.4120           | 0.0577        | 1429 ± 184  | 1376 ± 175  | 1034 ± 62   | 879 ± 154   |
| 201738_at   | GC20      | translation factor sui1 homolog                         | -0.0831          | <b>0.0334</b>     | -0.2666          | 0.1112            | 0.2023        | 2748 ± 223  | 2633 ± 124  | 2225 ± 100  | 2088 ± 421  |
| 204224_s_at | GCH1      | GTP cyclohydrolase 1                                    | <b>-0.0093</b>   | 0.1634            | -0.1284          | 0.4031            | 0.1779        | 230 ± 11    | 187 ± 13    | 202 ± 11    | 176 ± 30    |
| 214005_at   | GGCX      | gamma-glutamyl carboxylase                              | -0.0827          | <b>0.0157</b>     | <b>0.0169</b>    | 0.3015            | 0.0605        | 216 ± 16    | 242 ± 35    | 215 ± 21    | 145 ± 7     |
| 209248_at   | GHITM     | growth hormone inducible transmembrane protein          | <b>-0.0187</b>   | <b>0.0324</b>     | -0.1177          | 0.3383            | 0.0615        | 3766 ± 500  | 3188 ± 361  | 2607 ± 259  | 2286 ± 391  |
| 209249_s_at | GHITM     | growth hormone inducible transmembrane protein          | <b>-0.0316</b>   | <b>0.0299</b>     | -0.4064          | 0.2521            | 0.0758        | 2140 ± 265  | 1815 ± 264  | 1352 ± 127  | 1365 ± 297  |
| 219137_s_at | GL004     | GL004 protein                                           | -0.0894          | <b>0.0360</b>     | -0.1503          | 0.0771            | 0.1230        | 1403 ± 91   | 1335 ± 46   | 1106 ± 99   | 1114 ± 156  |
| 200681_at   | GLO1      | glyoxalase I                                            | <b>-0.0240</b>   | 0.0961            | -0.3395          | 0.3674            | 0.2520        | 2702 ± 217  | 2459 ± 274  | 2065 ± 198  | 2124 ± 346  |
| 205279_s_at | GLRB      | glycine receptor, beta                                  | -0.0745          | <b>0.0183</b>     | -0.4049          | 0.1353            | <b>0.0516</b> | 515 ± 104   | 386 ± 61    | 245 ± 38    | 288 ± 48    |
| 205280_at   | GLRB      | glycine receptor, beta                                  | <b>-0.0252</b>   | <b>0.0020</b>     | -0.1477          | 0.1717            | 0.0916        | 778 ± 142   | 545 ± 112   | 421 ± 88    | 393 ± 112   |
| 206662_at   | GLRX      | glutaredoxin                                            | -0.0728          | <b>0.0340</b>     | -0.4513          | <b>0.0457</b>     | <b>0.0196</b> | 1484 ± 231  | 829 ± 69    | 846 ± 76    | 829 ± 166   |
| 203158_s_at | GLS       | glutaminase                                             | <b>-0.0238</b>   | <b>0.0149</b>     | -0.2128          | 0.3964            | <b>0.0057</b> | 369 ± 40    | 282 ± 19    | 238 ± 15    | 223 ± 31    |
| 203159_at   | GLS       | glutaminase                                             | <b>-0.0018</b>   | <b>0.0029</b>     | 0.4161           | 0.0655            | 0.0992        | 4277 ± 509  | 3496 ± 587  | 2869 ± 391  | 2548 ± 575  |
| 200947_s_at | GLUD1     | glutamate dehydrogenase 1                               | <b>-0.0132</b>   | <b>0.0043</b>     | -0.2764          | 0.1425            | <b>0.0154</b> | 3533 ± 227  | 3447 ± 269  | 3268 ± 157  | 2427 ± 314  |
| 200946_x_at | GLUD1     | glutamate dehydrogenase 1                               | <b>-0.0138</b>   | <b>0.0113</b>     | -0.4296          | 0.3589            | <b>0.0293</b> | 2361 ± 224  | 2204 ± 226  | 2169 ± 231  | 1452 ± 124  |
| 215794_x_at | GLUD2     | Glutamate dehydrogenase-2                               | <b>-0.0324</b>   | <b>0.0321</b>     | <b>-0.0247</b>   | 0.4324            | <b>0.0429</b> | 773 ± 90    | 686 ± 96    | 530 ± 31    | 495 ± 10    |
| 200648_s_at | GLUL      | glutamate-ammonia ligase                                | <b>-0.0268</b>   | <b>0.0005</b>     | -0.1397          | -0.1009           | 0.0844        | 2336 ± 499  | 1694 ± 273  | 1658 ± 161  | 978 ± 281   |
| 220108_at   | GNA14     | guanine nucleotide binding protein , alpha 14           | <b>-0.0085</b>   | <b>0.0126</b>     | 0.1015           | 0.3239            | <b>0.0000</b> | 324 ± 22    | 346 ± 18    | 330 ± 26    | 139 ± 32    |
| 206355_at   | GNAL      | guanine nucleotide binding protein , alpha activating   | <b>-0.0046</b>   | <b>0.0088</b>     | -0.2666          | -0.4524           | 0.0962        | 373 ± 43    | 369 ± 41    | 325 ± 25    | 242 ± 40    |
| 204762_s_at | GNAO1     | guanine nucleotide binding protein , alpha activating O | <b>-0.0011</b>   | <b>0.0023</b>     | <b>-0.0079</b>   | 0.1545            | <b>0.0233</b> | 1172 ± 122  | 1272 ± 160  | 738 ± 49    | 819 ± 163   |
| 200780_x_at | GNAS      | GNAS complex locus                                      | <b>-0.0186</b>   | 0.0570            | <b>-0.0278</b>   | 0.1798            | 0.1125        | 15851 ± 558 | 14022 ± 958 | 15087 ± 805 | 2419 ± 1638 |
| 200981_x_at | GNAS      | GNAS complex locus                                      | <b>-0.0305</b>   | <b>0.0024</b>     | <b>-0.0022</b>   | <b>0.0457</b>     | <b>0.0103</b> | 15590 ± 672 | 3173 ± 1079 | 13330 ± 573 | 0715 ± 1378 |
| 212273_x_at | GNAS      | GNAS complex locus                                      | <b>-0.0219</b>   | <b>0.0040</b>     | -0.4654          | 0.1431            | <b>0.0151</b> | 15346 ± 513 | 12684 ± 969 | 13037 ± 942 | 0407 ± 1560 |
| 214157_at   | GNAS      | GNAS complex locus                                      | <b>-0.0060</b>   | <b>0.0054</b>     | <b>-0.0275</b>   | 0.2411            | <b>0.0355</b> | 1042 ± 146  | 815 ± 44    | 752 ± 77    | 610 ± 57    |
| 211858_x_at | GNAS      | GNAS complex locus                                      | <b>-0.0035</b>   | <b>0.0316</b>     | <b>-0.0004</b>   | 0.1307            | <b>0.0152</b> | 11748 ± 890 | 9345 ± 1392 | 7661 ± 752  | 6971 ± 1309 |
| 214548_x_at | GNAS      | GNAS complex locus                                      | <b>-0.0375</b>   | <b>0.0242</b>     | -0.2501          | 0.1925            | 0.0904        | 16408 ± 419 | 3885 ± 1321 | 13321 ± 650 | 2347 ± 1837 |
| 200744_s_at | GNB1      | guanine nucleotide binding protein , beta polypeptide 1 | <b>-0.0362</b>   | 0.2471            | <b>-0.0395</b>   | 0.1740            | 0.1601        | 662 ± 73    | 474 ± 52    | 538 ± 58    | 482 ± 70    |
| 200745_s_at | GNB1      | guanine nucleotide binding protein , beta polypeptide 1 | <b>-0.0438</b>   | <b>0.0026</b>     | 0.3629           | 0.4306            | 0.1644        | 3025 ± 216  | 2635 ± 201  | 2490 ± 136  | 2385 ± 290  |
| 222005_s_at | GNG3      | guanine nucleotide binding protein , gamma 3            | <b>0.0000</b>    | <b>0.0012</b>     | -0.2590          | 0.4586            | <b>0.0265</b> | 1904 ± 212  | 1866 ± 278  | 1615 ± 235  | 908 ± 115   |
| 210425_x_at | GOLGIN-67 | golgin-67                                               | <b>-0.0029</b>   | <b>0.0176</b>     | -0.1951          | -0.2947           | <b>0.0045</b> | 1183 ± 100  | 960 ± 107   | 735 ± 120   | 581 ± 132   |
| 208798_x_at | GOLGIN-67 | golgin-67                                               | <b>-0.0213</b>   | <b>0.0129</b>     | -0.3284          | 0.2218            | 0.0616        | 1634 ± 134  | 1319 ± 108  | 1349 ± 188  | 978 ± 206   |
| 208843_s_at | GORASP2   | golgi reassembly stacking protein 2, 55kDa              | <b>-0.0307</b>   | 0.2282            | <b>0.0177</b>    | <b>-0.0397</b>    | 0.2384        | 1527 ± 62   | 1706 ± 66   | 1525 ± 55   | 1460 ± 136  |
| 207812_s_at | GORASP2   | golgi reassembly stacking protein 2, 55kDa              | <b>-0.0325</b>   | 0.0642            | 0.2441           | -0.1270           | 0.0905        | 1314 ± 49   | 1373 ± 90   | 1258 ± 63   | 1096 ± 99   |
| 208813_at   | GOT1      | glutamic-oxaloacetic transaminase 1, soluble            | <b>-0.0001</b>   | <b>0.0276</b>     | -0.4403          | -0.1149           | 0.0628        | 1289 ± 242  | 987 ± 207   | 671 ± 139   | 546 ± 206   |
| 200708_at   | GOT2      | glutamic-oxaloacetic transaminase 2, mitochondrial      | <b>-0.0218</b>   | <b>0.0169</b>     | 0.0578           | 0.3800            | <b>0.0222</b> | 2442 ± 80   | 2450 ± 260  | 1863 ± 149  | 1913 ± 147  |
| 211060_x_at | GPAA1     | GPAA1P anchor attachment protein 1 homolog              | <b>-0.0332</b>   | 0.0627            | 0.2325           | 0.4906            | 0.2260        | 823 ± 51    | 843 ± 100   | 751 ± 70    | 639 ± 41    |

| Probe set   | Name     | Description                                             | NFT <sub>0</sub> | MMSE <sub>0</sub> | NFT <sub>1</sub> | MMSE <sub>1</sub> | ANOVA         | Control     | Incipient   | Moderate   | Severe      |
|-------------|----------|---------------------------------------------------------|------------------|-------------------|------------------|-------------------|---------------|-------------|-------------|------------|-------------|
| 207174_at   | GPC5     | glypican 5                                              | <b>-0.0112</b>   | <b>0.0051</b>     | 0.4731           | -0.3603           | <b>0.0406</b> | 282 ± 19    | 325 ± 57    | 299 ± 23   | 186 ± 23    |
| 208308_s_at | GPI      | glucose phosphate isomerase                             | -0.0830          | <b>0.0070</b>     | -0.0721          | 0.3316            | 0.0886        | 3211 ± 320  | 2880 ± 412  | 2543 ± 252 | 1965 ± 388  |
| 209469_at   | GPM6A    | glycoprotein M6A                                        | -0.0599          | <b>0.0113</b>     | -0.3806          | -0.3004           | 0.0619        | 8482 ± 449  | 8256 ± 723  | 8168 ± 941 | 5772 ± 770  |
| 209470_s_at | GPM6A    | glycoprotein M6A                                        | <b>-0.0178</b>   | <b>0.0038</b>     | -0.2145          | 0.3256            | <b>0.0334</b> | 8036 ± 601  | 7569 ± 1000 | 6653 ± 847 | 4586 ± 876  |
| 221288_at   | GPR22    | G protein-coupled receptor 22                           | -0.0612          | <b>0.0004</b>     | -0.2999          | <b>0.0149</b>     | <b>0.0054</b> | 335 ± 43    | 240 ± 40    | 141 ± 30   | 152 ± 48    |
| 209991_x_at | GPR51    | G protein-coupled receptor 51                           | -0.1557          | <b>0.0310</b>     | -0.4349          | -0.3161           | 0.1829        | 931 ± 85    | 1053 ± 219  | 883 ± 141  | 571 ± 141   |
| 209990_s_at | GPR51    | G protein-coupled receptor 51                           | <b>-0.0048</b>   | <b>0.0018</b>     | -0.4705          | 0.1291            | <b>0.0470</b> | 5017 ± 552  | 4018 ± 595  | 3662 ± 651 | 2590 ± 496  |
| 211520_s_at | GRIA1    | glutamate receptor, ionotropic, AMPA 1                  | -0.1427          | <b>0.0179</b>     | 0.2507           | 0.1108            | 0.1953        | 259 ± 44    | 215 ± 38    | 173 ± 18   | 162 ± 29    |
| 209793_at   | GRIA1    | glutamate receptor, ionotropic, AMPA 1                  | <b>-0.0082</b>   | <b>0.0078</b>     | -0.4700          | -0.0656           | <b>0.0099</b> | 2199 ± 276  | 1690 ± 389  | 993 ± 98   | 1055 ± 232  |
| 205358_at   | GRIA2    | glutamate receptor, ionotropic, AMPA 2                  | -0.3308          | <b>0.0212</b>     | -0.4981          | 0.1884            | 0.1726        | 7425 ± 317  | 7290 ± 456  | 7576 ± 717 | 5752 ± 860  |
| 206730_at   | GRIA3    | glutamate receptor, ionotrophic, AMPA 3                 | <b>-0.0076</b>   | <b>0.0200</b>     | -0.4489          | -0.1211           | <b>0.0056</b> | 418 ± 23    | 513 ± 60    | 330 ± 34   | 297 ± 43    |
| 206534_at   | GRIN2A   | glutamate receptor, ionotropic, N-methyl D-aspartate 2A | <b>-0.0037</b>   | <b>0.0104</b>     | -0.2958          | 0.3293            | <b>0.0454</b> | 224 ± 30    | 262 ± 50    | 154 ± 34   | 112 ± 26    |
| 205541_s_at | GSPT2    | G1 to S phase transition 2                              | -0.0554          | <b>0.0482</b>     | -0.2396          | 0.1623            | 0.0653        | 688 ± 62    | 493 ± 77    | 483 ± 36   | 471 ± 85    |
| 202967_at   | GSTA4    | glutathione S-transferase A4                            | <b>-0.0039</b>   | <b>0.0238</b>     | -0.2333          | 0.3244            | <b>0.0393</b> | 1906 ± 167  | 1579 ± 177  | 1373 ± 177 | 1230 ± 146  |
| 202554_s_at | GSTM3    | glutathione S-transferase M3                            | <b>-0.0494</b>   | 0.5239            | 0.3724           | -0.1898           | 0.5830        | 1344 ± 137  | 1484 ± 233  | 1133 ± 190 | 1206 ± 170  |
| 201470_at   | GSTTLp28 | glutathione-S-transferase like                          | <b>-0.0192</b>   | <b>0.0057</b>     | -0.4297          | 0.2103            | 0.1335        | 2576 ± 113  | 2481 ± 163  | 2180 ± 147 | 2180 ± 172  |
| 202678_at   | GTF2A2   | general transcription factor IIA, 2, 12kDa              | <b>-0.0174</b>   | 0.1775            | -0.0760          | <b>0.0448</b>     | 0.1555        | 825 ± 39    | 670 ± 49    | 635 ± 64   | 683 ± 89    |
| 203817_at   | GUCY1B3  | guanylate cyclase 1, soluble, beta 3                    | <b>-0.0070</b>   | <b>0.0084</b>     | 0.2298           | 0.0799            | <b>0.0305</b> | 2116 ± 325  | 1694 ± 248  | 1201 ± 176 | 1128 ± 205  |
| 200075_s_at | GUK1     | guanylate kinase 1                                      | <b>-0.0218</b>   | <b>0.0216</b>     | -0.2739          | 0.2388            | 0.0972        | 2769 ± 282  | 2417 ± 185  | 2167 ± 104 | 1947 ± 285  |
| 217717_s_at | GW128    | GW128 protein                                           | <b>-0.0375</b>   | 0.0797            | -0.3434          | -0.4699           | 0.2079        | 1948 ± 186  | 1734 ± 385  | 1256 ± 116 | 1349 ± 343  |
| 217718_s_at | GW128    | GW128 protein                                           | <b>-0.0360</b>   | <b>0.0099</b>     | -0.4800          | 0.2452            | 0.2347        | 11085 ± 706 | 10473 ± 927 | 9320 ± 633 | 8682 ± 1220 |
| 207168_s_at | H2AFY    | H2A histone family, member Y                            | -0.1291          | <b>0.0403</b>     | 0.4183           | -0.3448           | 0.1239        | 2313 ± 103  | 2354 ± 77   | 2015 ± 99  | 1983 ± 224  |
| 212206_s_at | H2AV     | histone H2A.F/Z variant                                 | <b>-0.0090</b>   | 0.0697            | -0.1319          | -0.4535           | 0.1102        | 1000 ± 59   | 924 ± 60    | 831 ± 57   | 834 ± 33    |
| 201036_s_at | HADHSC   | L-3-hydroxyacyl-Coenzyme A dehydrogenase, short chain   | <b>-0.0441</b>   | 0.3749            | 0.4509           | <b>-0.0162</b>    | 0.2154        | 760 ± 40    | 785 ± 78    | 792 ± 51   | 617 ± 82    |
| 211569_s_at | HADHSC   | L-3-hydroxyacyl-Coenzyme A dehydrogenase, short chain   | -0.2232          | <b>0.0493</b>     | <b>-0.0326</b>   | 0.4335            | 0.2136        | 323 ± 24    | 333 ± 17    | 286 ± 24   | 272 ± 17    |
| 205635_at   | HAPIP    | huntingtin-associated protein interacting protein       | <b>-0.0209</b>   | <b>0.0174</b>     | -0.4418          | 0.1694            | 0.0648        | 1278 ± 131  | 1066 ± 130  | 923 ± 98   | 855 ± 96    |
| 222230_s_at | HARP11   | uncharacterized hypothalamus protein HARP11             | <b>-0.0452</b>   | <b>0.0330</b>     | -0.3547          | 0.3908            | 0.0877        | 2093 ± 351  | 1677 ± 307  | 1216 ± 142 | 1178 ± 275  |
| 204018_x_at | HBA1     | hemoglobin, alpha 1                                     | -0.1249          | <b>0.0122</b>     | 0.0574           | -0.2787           | <b>0.0051</b> | 4439 ± 1068 | 7014 ± 1153 | 4733 ± 561 | 1422 ± 269  |
| 209458_x_at | HBA1     | hemoglobin, alpha 1                                     | -0.1122          | <b>0.0231</b>     | 0.1172           | -0.3316           | <b>0.0324</b> | 4638 ± 1110 | 5385 ± 1043 | 4326 ± 633 | 2051 ± 621  |
| 211699_x_at | HBA1     | hemoglobin, alpha 1                                     | -0.2131          | <b>0.0305</b>     | 0.1510           | -0.4571           | <b>0.0498</b> | 3245 ± 717  | 4454 ± 686  | 3322 ± 416 | 1756 ± 481  |
| 211745_x_at | HBA2     | hemoglobin, alpha 2                                     | -0.1882          | <b>0.0257</b>     | 0.0684           | -0.2924           | <b>0.0165</b> | 4677 ± 1127 | 7230 ± 1226 | 5047 ± 702 | 2120 ± 625  |
| 211696_x_at | HBB      | hemoglobin, beta                                        | -0.0567          | <b>0.0299</b>     | 0.1455           | -0.1629           | <b>0.0259</b> | 3914 ± 1009 | 5946 ± 1422 | 3800 ± 727 | 1259 ± 161  |
| 209116_x_at | HBB      | hemoglobin, beta                                        | -0.0697          | <b>0.0419</b>     | 0.0576           | -0.1058           | <b>0.0134</b> | 2072 ± 526  | 3804 ± 962  | 2316 ± 538 | 572 ± 78    |
| 202300_at   | HBXIP    | hepatitis B virus x interacting protein                 | <b>-0.0064</b>   | <b>0.0042</b>     | -0.2895          | 0.2019            | 0.0836        | 1516 ± 111  | 1377 ± 152  | 1137 ± 62  | 1147 ± 137  |
| 218467_at   | HCCA3    | hepatocellular carcinoma susceptibility protein         | <b>-0.0231</b>   | <b>0.0106</b>     | -0.2880          | -0.4819           | <b>0.0164</b> | 1907 ± 89   | 1799 ± 104  | 1547 ± 99  | 1462 ± 128  |
| 203745_at   | HCCS     | holocytochrome c synthase                               | <b>-0.0009</b>   | <b>0.0072</b>     | -0.3093          | -0.4453           | 0.0609        | 587 ± 37    | 552 ± 66    | 474 ± 20   | 419 ± 56    |
| 208905_at   | HCS      | cytochrome c                                            | <b>-0.0075</b>   | <b>0.0032</b>     | <b>-0.0511</b>   | -0.2885           | <b>0.0341</b> | 5741 ± 469  | 5213 ± 723  | 4540 ± 314 | 3586 ± 502  |
| 218306_s_at | HERC1    | hect (carboxyl terminus) domain and RCC1-like domain 1  | <b>-0.0202</b>   | <b>0.0071</b>     | 0.3356           | 0.2379            | <b>0.0046</b> | 1929 ± 123  | 1768 ± 140  | 1779 ± 167 | 1217 ± 52   |
| 217902_s_at | HERC2    | hect domain and RLD 2                                   | <b>-0.0264</b>   | 0.1259            | -0.0589          | -0.4307           | 0.4833        | 914 ± 68    | 869 ± 74    | 845 ± 64   | 762 ± 69    |

| Probe set   | Name      | Description                                       | NFT <sub>0</sub> | MMSE <sub>0</sub> | NFT <sub>1</sub> | MMSE <sub>1</sub> | ANOVA         | Control    | Incipient   | Moderate   | Severe     |
|-------------|-----------|---------------------------------------------------|------------------|-------------------|------------------|-------------------|---------------|------------|-------------|------------|------------|
| 201944_at   | HEXB      | hexosaminidase B                                  | <b>-0.0050</b>   | <b>0.0543</b>     | -0.0906          | 0.1638            | 0.2112        | 602 ± 45   | 581 ± 24    | 504 ± 43   | 487 ± 56   |
| 218839_at   | HEY1      | hairy/enhancer-of-split related with YRPW motif 1 | <b>-0.0400</b>   | 0.0615            | 0.3790           | -0.4520           | 0.1372        | 726 ± 55   | 661 ± 94    | 684 ± 55   | 486 ± 92   |
| 200093_s_at | HINT1     | histidine triad nucleotide binding protein 1      | <b>-0.0001</b>   | <b>0.0021</b>     | <b>-0.0204</b>   | 0.2548            | <b>0.0470</b> | 2390 ± 334 | 2006 ± 222  | 1694 ± 160 | 1348 ± 172 |
| 218946_at   | HIRIP5    | HIRA interacting protein 5                        | <b>-0.0280</b>   | 0.0832            | -0.4160          | 0.4486            | 0.3137        | 454 ± 48   | 424 ± 43    | 385 ± 32   | 348 ± 39   |
| 208729_x_at | HLA-B     | major histocompatibility complex, class I, B      | <b>-0.0055</b>   | 0.0931            | -0.0585          | -0.2397           | 0.1480        | 1209 ± 202 | 1093 ± 192  | 949 ± 112  | 649 ± 142  |
| 209140_x_at | HLA-B     | major histocompatibility complex, class I, B      | <b>-0.0074</b>   | 0.4501            | -0.1541          | -0.1751           | 0.4639        | 3521 ± 406 | 3219 ± 488  | 2945 ± 350 | 2575 ± 478 |
| 211529_x_at | HLA-G     | HLA-G histocompatibility antigen, class I, G      | <b>-0.0485</b>   | 0.1848            | <b>-0.0247</b>   | 0.2852            | 0.1475        | 1182 ± 209 | 823 ± 174   | 1040 ± 189 | 580 ± 158  |
| 218152_at   | HMG20A    | high-mobility group 20A                           | <b>-0.0392</b>   | 0.1617            | 0.4775           | -0.1772           | 0.4909        | 623 ± 55   | 614 ± 37    | 595 ± 43   | 520 ± 59   |
| 212434_at   | HMGE      | GrpE-like protein cochaperone                     | <b>-0.0009</b>   | <b>0.0001</b>     | -0.4224          | -0.2795           | <b>0.0095</b> | 548 ± 25   | 486 ± 57    | 400 ± 41   | 333 ± 56   |
| 202579_x_at | HMGN4     | high mobility group nucleosomal binding domain 4  | <b>-0.0404</b>   | <b>0.0126</b>     | 0.1915           | -0.4326           | <b>0.0002</b> | 1078 ± 39  | 1052 ± 68   | 935 ± 35   | 741 ± 29   |
| 212626_x_at | HNRPC     | heterogeneous nuclear ribonucleoprotein C         | <b>-0.0328</b>   | 0.1576            | <b>-0.0548</b>   | -0.2072           | <b>0.0372</b> | 2259 ± 234 | 1908 ± 231  | 2192 ± 149 | 1408 ± 137 |
| 209330_s_at | HNRPD     | heterogeneous nuclear ribonucleoprotein D         | <b>-0.0248</b>   | <b>0.0076</b>     | 0.3495           | -0.3117           | 0.0614        | 540 ± 80   | 528 ± 42    | 411 ± 32   | 332 ± 26   |
| 209067_s_at | HNRPDL    | heterogeneous nuclear ribonucleoprotein D-like    | <b>-0.0418</b>   | <b>0.0476</b>     | 0.1833           | -0.1610           | <b>0.0231</b> | 1361 ± 155 | 1401 ± 193  | 1067 ± 121 | 755 ± 54   |
| 200097_s_at | HNRPK     | heterogeneous nuclear ribonucleoprotein K         | <b>-0.0275</b>   | <b>0.0232</b>     | 0.2932           | 0.0725            | 0.0874        | 1828 ± 167 | 1974 ± 257  | 1650 ± 128 | 1260 ± 160 |
| 208766_s_at | HNRPR     | heterogeneous nuclear ribonucleoprotein R         | <b>-0.0354</b>   | 0.1974            | -0.1714          | 0.3809            | 0.3686        | 2330 ± 131 | 2401 ± 73   | 2127 ± 92  | 2105 ± 202 |
| 205454_at   | HPCA      | hippocalcin                                       | <b>-0.0190</b>   | <b>0.0017</b>     | -0.4129          | 0.2393            | 0.1540        | 5236 ± 932 | 4404 ± 1192 | 2761 ± 479 | 2990 ± 610 |
| 219671_at   | HPCAL4    | hippocalcin like 4                                | <b>-0.0541</b>   | <b>0.0247</b>     | -0.3544          | 0.1130            | <b>0.0315</b> | 1789 ± 211 | 1136 ± 179  | 1463 ± 196 | 994 ± 153  |
| 202854_at   | HPRT1     | hypoxanthine phosphoribosyltransferase 1          | <b>-0.0033</b>   | <b>0.0422</b>     | -0.4344          | -0.0586           | <b>0.0108</b> | 1908 ± 362 | 1344 ± 202  | 1012 ± 156 | 620 ± 101  |
| 217736_s_at | HRI       | heme-regulated initiation factor 2-alpha kinase   | <b>-0.0371</b>   | <b>0.0462</b>     | -0.1269          | -0.3178           | <b>0.0001</b> | 2116 ± 111 | 2547 ± 55   | 1731 ± 75  | 1969 ± 113 |
| 206445_s_at | HRMT1L2   | HMT1 hnRNP methyltransferase-like 2               | <b>-0.0053</b>   | <b>0.0027</b>     | 0.2747           | 0.1676            | 0.1883        | 1529 ± 115 | 1516 ± 170  | 1273 ± 33  | 1194 ± 159 |
| 219697_at   | HS3ST2    | heparan sulfate 3-O-sulfotransferase 2            | <b>-0.0155</b>   | <b>0.0099</b>     | 0.4324           | 0.1425            | <b>0.0345</b> | 1043 ± 105 | 945 ± 86    | 792 ± 95   | 649 ± 83   |
| 204722_at   | HSA243396 | voltage-gated sodium channel beta-3 subunit       | <b>-0.0315</b>   | <b>0.0123</b>     | 0.3146           | 0.0675            | <b>0.0275</b> | 4699 ± 791 | 3133 ± 355  | 2303 ± 321 | 2462 ± 668 |
| 204723_at   | HSA243396 | voltage-gated sodium channel beta-3 subunit       | <b>-0.0202</b>   | <b>0.0077</b>     | 0.2978           | 0.3616            | <b>0.0337</b> | 3718 ± 631 | 2296 ± 225  | 2073 ± 276 | 1984 ± 442 |
| 204405_x_at | HSA9761   | putative dimethyladenosine transferase            | <b>-0.0189</b>   | 0.3875            | -0.4826          | -0.0860           | 0.2417        | 874 ± 39   | 858 ± 50    | 883 ± 29   | 753 ± 70   |
| 218608_at   | HSA9947   | putative ATPase                                   | -0.6319          | <b>0.0398</b>     | 0.3550           | 0.3491            | 0.2830        | 929 ± 85   | 943 ± 109   | 877 ± 113  | 678 ± 99   |
| 217869_at   | HSD17B12  | hydroxysteroid dehydrogenase 12                   | <b>-0.0439</b>   | 0.7493            | -0.3927          | 0.3385            | 0.6994        | 1847 ± 107 | 1619 ± 199  | 1624 ± 116 | 1700 ± 213 |
| 209657_s_at | HSF2      | heat shock transcription factor 2                 | <b>-0.0239</b>   | 0.2089            | 0.4017           | -0.0727           | 0.2622        | 275 ± 11   | 307 ± 42    | 258 ± 14   | 230 ± 33   |
| 212922_s_at | HSKM-B    | HSKM-B protein                                    | <b>-0.0012</b>   | <b>0.0082</b>     | <b>-0.0337</b>   | 0.0777            | <b>0.0489</b> | 829 ± 118  | 860 ± 93    | 665 ± 51   | 501 ± 41   |
| 208744_x_at | HSP105B   | heat shock 105kD                                  | <b>-0.0010</b>   | <b>0.0119</b>     | -0.3269          | 0.2570            | <b>0.0150</b> | 462 ± 55   | 309 ± 77    | 228 ± 37   | 220 ± 38   |
| 206976_s_at | HSP105B   | heat shock 105kD                                  | <b>-0.0018</b>   | <b>0.0149</b>     | <b>-0.0090</b>   | 0.1392            | <b>0.0184</b> | 5310 ± 630 | 3838 ± 557  | 2990 ± 331 | 2767 ± 715 |
| 211936_at   | HSPA5     | heat shock 70kDa protein 5                        | <b>-0.0218</b>   | <b>0.0340</b>     | -0.0645          | 0.1923            | <b>0.0186</b> | 2203 ± 259 | 1540 ± 177  | 1408 ± 167 | 1183 ± 238 |
| 221891_x_at | HSPA8     | heat shock 70kDa protein 8                        | <b>-0.0347</b>   | 0.0939            | -0.3889          | 0.2171            | 0.2543        | 5448 ± 810 | 4206 ± 773  | 4465 ± 691 | 3213 ± 602 |
| 210338_s_at | HSPA8     | heat shock 70kDa protein 8                        | <b>-0.0108</b>   | <b>0.0485</b>     | -0.1140          | 0.1012            | 0.1169        | 3681 ± 862 | 2343 ± 602  | 2288 ± 441 | 1248 ± 553 |
| 208687_x_at | HSPA8     | heat shock 70kDa protein 8                        | <b>-0.0044</b>   | <b>0.0283</b>     | -0.2667          | 0.1426            | 0.1074        | 3821 ± 653 | 2452 ± 466  | 2597 ± 396 | 2005 ± 444 |
| 200691_s_at | HSPA9B    | heat shock 70kDa protein 9B                       | <b>-0.0072</b>   | <b>0.0030</b>     | <b>-0.0466</b>   | 0.2915            | 0.1030        | 1920 ± 102 | 1834 ± 86   | 1657 ± 78  | 1578 ± 141 |
| 218291_at   | HSPC003   | HSPC003 protein                                   | <b>-0.0101</b>   | <b>0.0046</b>     | -0.4183          | 0.2948            | <b>0.0218</b> | 422 ± 16   | 406 ± 48    | 378 ± 35   | 284 ± 21   |
| 218026_at   | HSPC009   | HSPC009 protein                                   | <b>-0.0461</b>   | <b>0.0521</b>     | 0.2627           | -0.3230           | 0.1358        | 2261 ± 60  | 2363 ± 282  | 2200 ± 117 | 1811 ± 151 |
| 218190_s_at | HSPC051   | ubiquinol-cytochrome c reductase complex          | <b>-0.0261</b>   | <b>0.0071</b>     | -0.4421          | -0.4124           | <b>0.0263</b> | 6097 ± 570 | 6171 ± 548  | 4410 ± 394 | 4266 ± 643 |
| 221570_s_at | HSPC133   | HSPC133 protein                                   | <b>-0.0390</b>   | 0.0792            | -0.2256          | 0.4812            | 0.1497        | 874 ± 70   | 782 ± 80    | 636 ± 80   | 671 ± 97   |

| Probe set   | Name        | Description                                                 | NFT <sub>0</sub> | MMSE <sub>0</sub> | NFT <sub>1</sub> | MMSE <sub>1</sub> | ANOVA         | Control    | Incipient  | Moderate   | Severe      |
|-------------|-------------|-------------------------------------------------------------|------------------|-------------------|------------------|-------------------|---------------|------------|------------|------------|-------------|
| 218491_s_at | HSPC144     | HSPC144 protein                                             | <b>-0.0004</b>   | <b>0.0000</b>     | -0.3992          | 0.1759            | <b>0.0413</b> | 989 ± 63   | 1049 ± 44  | 855 ± 54   | 741 ± 117   |
| 221597_s_at | HSPC171     | HSPC171 protein                                             | <b>-0.0009</b>   | <b>0.0018</b>     | <b>-0.0232</b>   | 0.0583            | <b>0.0008</b> | 718 ± 36   | 690 ± 54   | 576 ± 19   | 500 ± 21    |
| 211968_s_at | HSPCA       | heat shock 90kDa protein 1, alpha                           | <b>-0.0382</b>   | 0.1059            | <b>-0.0100</b>   | 0.1738            | 0.1110        | 4154 ± 682 | 2608 ± 460 | 3120 ± 537 | 2216 ± 401  |
| 200064_at   | HSPCB       | heat shock 90kDa protein 1, beta                            | <b>-0.0059</b>   | <b>0.0203</b>     | -0.0723          | 0.2991            | <b>0.0042</b> | 8350 ± 770 | 5982 ± 745 | 5472 ± 549 | 4407 ± 725  |
| 214359_s_at | HSPCB       | heat shock 90kDa protein 1, beta                            | <b>-0.0001</b>   | <b>0.0105</b>     | <b>-0.0529</b>   | -0.4753           | 0.0889        | 2432 ± 468 | 1818 ± 373 | 1593 ± 223 | 942 ± 393   |
| 200806_s_at | HSPD1       | heat shock 60kDa protein 1                                  | <b>-0.0402</b>   | 0.0995            | -0.0793          | -0.3346           | 0.1587        | 852 ± 128  | 675 ± 131  | 701 ± 67   | 475 ± 68    |
| 205133_s_at | HSPE1       | heat shock 10kDa protein 1                                  | <b>-0.0012</b>   | <b>0.0065</b>     | -0.1683          | 0.2496            | <b>0.0188</b> | 887 ± 40   | 834 ± 73   | 708 ± 44   | 631 ± 67    |
| 204521_at   | HSU79274    | protein predicted by clone 23733                            | <b>-0.0397</b>   | <b>0.0532</b>     | -0.3176          | -0.2337           | 0.1279        | 783 ± 67   | 699 ± 80   | 594 ± 32   | 587 ± 67    |
| 221622_s_at | HT007       | uncharacterized hypothalamus protein HT007                  | <b>-0.0187</b>   | 0.2901            | -0.1958          | -0.3127           | 0.2623        | 1619 ± 117 | 1583 ± 184 | 1251 ± 118 | 1417 ± 159  |
| 201595_s_at | HT010       | uncharacterized hypothalamus protein HT010                  | <b>-0.0020</b>   | <b>0.0087</b>     | -0.3344          | -0.2897           | <b>0.0099</b> | 1367 ± 109 | 1118 ± 133 | 973 ± 56   | 842 ± 123   |
| 204565_at   | HT012       | uncharacterized hypothalamus protein HT012                  | <b>-0.0020</b>   | <b>0.0010</b>     | -0.2409          | 0.1205            | <b>0.0114</b> | 685 ± 40   | 744 ± 51   | 524 ± 53   | 543 ± 59    |
| 219288_at   | HT021       | HT021                                                       | <b>-0.0346</b>   | <b>0.0483</b>     | -0.3616          | -0.1653           | <b>0.0053</b> | 1391 ± 111 | 1120 ± 96  | 1007 ± 62  | 903 ± 93    |
| 207404_s_at | HTR1E       | 5-hydroxytryptamine receptor 1E                             | <b>-0.0485</b>   | <b>0.0083</b>     | 0.4628           | 0.0563            | <b>0.0346</b> | 159 ± 31   | 165 ± 29   | 80 ± 10    | 85 ± 18     |
| 207135_at   | HTR2A       | 5-hydroxytryptamine receptor 2A                             | -0.0763          | <b>0.0076</b>     | 0.2894           | 0.4294            | 0.0662        | 955 ± 188  | 869 ± 142  | 633 ± 44   | 464 ± 66    |
| 200825_s_at | HYOU1       | hypoxia up-regulated 1                                      | <b>-0.0057</b>   | <b>0.0135</b>     | 0.4911           | 0.3321            | 0.1428        | 3543 ± 82  | 3708 ± 359 | 3273 ± 264 | 2947 ± 126  |
| 204744_s_at | IARS        | isoleucine-tRNA synthetase                                  | <b>-0.0267</b>   | <b>0.0046</b>     | 0.0880           | 0.0946            | <b>0.0499</b> | 2385 ± 217 | 2026 ± 159 | 1940 ± 159 | 1570 ± 229  |
| 203336_s_at | ICAP-1A     | integrin cytoplasmic domain-associated protein 1            | -0.1459          | <b>0.0425</b>     | 0.3127           | 0.2854            | 0.1714        | 619 ± 92   | 658 ± 52   | 593 ± 60   | 422 ± 75    |
| 210418_s_at | IDH3B       | isocitrate dehydrogenase 3 beta                             | <b>-0.0194</b>   | <b>0.0505</b>     | -0.3092          | -0.1913           | 0.1327        | 678 ± 69   | 744 ± 128  | 574 ± 53   | 461 ± 55    |
| 210014_x_at | IDH3B       | isocitrate dehydrogenase 3 beta                             | -0.0667          | <b>0.0284</b>     | 0.3542           | -0.1530           | <b>0.0413</b> | 1156 ± 85  | 1236 ± 91  | 1027 ± 47  | 915 ± 58    |
| 206342_x_at | IDS         | iduronate 2-sulfatase                                       | <b>-0.0071</b>   | <b>0.0243</b>     | -0.1804          | 0.1371            | 0.0975        | 771 ± 86   | 757 ± 103  | 670 ± 47   | 510 ± 55    |
| 202439_s_at | IDS         | iduronate 2-sulfatase                                       | <b>-0.0021</b>   | <b>0.0006</b>     | -0.2939          | 0.0865            | 0.3498        | 999 ± 53   | 989 ± 162  | 878 ± 91   | 765 ± 75    |
| 203153_at   | IFIT1       | interferon-induced protein with tetratricopeptide repeats 1 | -0.1041          | <b>0.0315</b>     | -0.1982          | -0.4728           | <b>0.0451</b> | 630 ± 73   | 636 ± 36   | 476 ± 68   | 352 ± 95    |
| 201642_at   | IFNGR2      | interferon gamma receptor 2                                 | <b>-0.0005</b>   | <b>0.0040</b>     | -0.0768          | 0.2327            | <b>0.0124</b> | 1607 ± 83  | 1491 ± 26  | 1404 ± 66  | 1291 ± 42   |
| 202147_s_at | IFRD1       | interferon-related developmental regulator 1                | <b>-0.0121</b>   | <b>0.0056</b>     | 0.2550           | 0.1383            | <b>0.0093</b> | 271 ± 31   | 235 ± 25   | 216 ± 28   | 116 ± 27    |
| 209541_at   | IGF1        | insulin-like growth factor 1                                | <b>-0.0322</b>   | <b>0.0104</b>     | -0.3300          | -0.2736           | 0.1265        | 191 ± 16   | 186 ± 16   | 152 ± 14   | 140 ± 23    |
| 217805_at   | ILF3        | interleukin enhancer binding factor 3, 90kDa                | <b>-0.0173</b>   | <b>0.0027</b>     | -0.3045          | 0.4752            | <b>0.0016</b> | 500 ± 38   | 502 ± 28   | 510 ± 18   | 340 ± 20    |
| 200084_at   | IMAGE145052 | small acidic protein                                        | <b>-0.0305</b>   | 0.0878            | 0.4675           | -0.3261           | 0.2146        | 2933 ± 219 | 2958 ± 284 | 2738 ± 245 | 2230 ± 302  |
| 204465_s_at | INA         | internexin neuronal intermediate filament protein, alpha    | <b>-0.0144</b>   | <b>0.0006</b>     | 0.1510           | 0.4609            | <b>0.0086</b> | 2274 ± 293 | 2067 ± 333 | 1214 ± 134 | 1265 ± 119  |
| 214787_at   | IRLB        | c-myc promoter-binding protein                              | -0.0709          | <b>0.0048</b>     | <b>-0.0217</b>   | 0.1709            | <b>0.0004</b> | 214 ± 13   | 177 ± 9    | 207 ± 7    | 134 ± 15    |
| 210213_s_at | ITGB4BP     | integrin beta 4 binding protein                             | <b>-0.0357</b>   | 0.1221            | -0.1010          | -0.3136           | 0.1684        | 498 ± 19   | 480 ± 61   | 469 ± 36   | 372 ± 30    |
| 217732_s_at | ITM2B       | integral membrane protein 2B                                | <b>-0.0143</b>   | 0.1480            | -0.3062          | -0.3015           | 0.3425        | 7753 ± 278 | 8144 ± 340 | 6804 ± 759 | 6473 ± 1132 |
| 205874_at   | ITPKA       | inositol 1,4,5-trisphosphate 3-kinase A                     | -0.2895          | <b>0.0031</b>     | 0.2679           | 0.2537            | 0.0842        | 363 ± 43   | 339 ± 46   | 290 ± 41   | 208 ± 41    |
| 203710_at   | ITPR1       | inositol 1,4,5-triphosphate receptor, type 1                | <b>-0.0267</b>   | <b>0.0144</b>     | 0.3065           | -0.4208           | <b>0.0054</b> | 1591 ± 180 | 1503 ± 153 | 1287 ± 124 | 810 ± 107   |
| 216944_s_at | ITPR1       | inositol 1,4,5-triphosphate receptor, type 1                | <b>-0.0231</b>   | <b>0.0260</b>     | -0.4587          | 0.4591            | 0.0691        | 405 ± 70   | 325 ± 56   | 264 ± 44   | 188 ± 47    |
| 211323_s_at | ITPR1       | inositol 1,4,5-triphosphate receptor, type 1                | <b>-0.0098</b>   | <b>0.0472</b>     | -0.1619          | -0.2128           | 0.1661        | 187 ± 37   | 203 ± 50   | 114 ± 18   | 100 ± 39    |
| 209898_x_at | ITSN2       | intersectin 2                                               | -0.0950          | <b>0.0147</b>     | -0.4033          | -0.2382           | <b>0.0492</b> | 1119 ± 96  | 1021 ± 84  | 1008 ± 59  | 797 ± 46    |
| 205842_s_at | JAK2        | Janus kinase 2                                              | -0.4365          | <b>0.0469</b>     | 0.4782           | -0.4874           | 0.1167        | 108 ± 10   | 123 ± 11   | 121 ± 12   | 83 ± 15     |
| 218976_at   | JDP1        | J domain containing protein 1                               | <b>-0.0270</b>   | <b>0.0459</b>     | -0.2447          | 0.3642            | 0.2171        | 1613 ± 64  | 1600 ± 285 | 1316 ± 126 | 1154 ± 190  |
| 203456_at   | JM4         | JM4 protein                                                 | <b>-0.0127</b>   | 0.1020            | -0.1452          | 0.1227            | 0.2817        | 840 ± 50   | 776 ± 80   | 668 ± 40   | 712 ± 91    |

| Probe set   | Name      | Description                                                 | NFT <sub>0</sub> | MMSE <sub>0</sub> | NFT <sub>1</sub> | MMSE <sub>1</sub> | ANOVA         | Control    | Incipient  | Moderate   | Severe     |
|-------------|-----------|-------------------------------------------------------------|------------------|-------------------|------------------|-------------------|---------------|------------|------------|------------|------------|
| 220188_at   | JPH3      | junctophilin 3                                              | <b>-0.0210</b>   | <b>0.0080</b>     | -0.3868          | 0.1673            | 0.0710        | 243 ± 32   | 184 ± 43   | 138 ± 25   | 116 ± 35   |
| 205206_at   | KAL1      | Kallmann syndrome 1 sequence                                | <b>-0.0107</b>   | <b>0.0035</b>     | -0.3143          | 0.1739            | 0.0768        | 1764 ± 205 | 1563 ± 117 | 1447 ± 179 | 1100 ± 150 |
| 203162_s_at | KATNB1    | katanin p80 subunit B 1                                     | -0.0638          | <b>0.0477</b>     | 0.2589           | <b>0.0540</b>     | 0.4090        | 1834 ± 283 | 1631 ± 225 | 1405 ± 107 | 1363 ± 220 |
| 203163_at   | KATNB1    | katanin p80 subunit B 1                                     | <b>-0.0045</b>   | <b>0.0072</b>     | 0.2291           | 0.3477            | <b>0.0546</b> | 245 ± 28   | 229 ± 39   | 189 ± 27   | 125 ± 31   |
| 210078_s_at | KCNAB1    | K+ VGC, shaker-related beta 1                               | <b>-0.0350</b>   | <b>0.0088</b>     | 0.2890           | 0.1088            | <b>0.0519</b> | 1426 ± 219 | 1429 ± 270 | 894 ± 104  | 752 ± 188  |
| 210471_s_at | KCNAB1    | K+ VGC, shaker-related beta 1                               | <b>-0.0120</b>   | <b>0.0015</b>     | 0.4633           | 0.2535            | <b>0.0206</b> | 1031 ± 256 | 612 ± 125  | 315 ± 19   | 332 ± 63   |
| 203402_at   | KCNAB2    | K+ VGC, shaker-related beta 2                               | -0.1121          | <b>0.0059</b>     | -0.4954          | 0.0568            | <b>0.0206</b> | 1702 ± 110 | 1719 ± 263 | 1793 ± 187 | 1061 ± 65  |
| 207103_at   | KCND2     | K+ VGC, Shal-related 2                                      | <b>-0.0303</b>   | <b>0.0362</b>     | -0.2481          | <b>0.0262</b>     | <b>0.0063</b> | 599 ± 77   | 477 ± 67   | 334 ± 41   | 301 ± 50   |
| 210263_at   | KCNF1     | potassium voltage-gated channel, subfamily F, member 1      | -0.2113          | <b>0.0157</b>     | 0.1906           | 0.2435            | 0.1031        | 302 ± 39   | 284 ± 37   | 273 ± 47   | 165 ± 33   |
| 221307_at   | KCNIP1    | Kv channel interacting protein 1                            | <b>-0.0206</b>   | <b>0.0139</b>     | 0.1317           | 0.1823            | 0.1303        | 255 ± 18   | 209 ± 25   | 201 ± 15   | 174 ± 38   |
| 207142_at   | KCNJ3     | K+ VGC inwardly-rectifying J 3                              | <b>-0.0253</b>   | <b>0.0061</b>     | 0.2089           | 0.3596            | 0.0989        | 137 ± 26   | 136 ± 20   | 91 ± 13    | 72 ± 18    |
| 204679_at   | KCNK1     | potassium channel, subfamily K, member 1                    | -0.0952          | <b>0.0487</b>     | -0.4763          | 0.3852            | 0.4129        | 1263 ± 134 | 1316 ± 50  | 1146 ± 108 | 1007 ± 178 |
| 220116_at   | KCNN2     | K+ intermediate/small g Ca2+ activated channel N2           | <b>-0.0196</b>   | <b>0.0176</b>     | 0.1590           | 0.3121            | <b>0.0323</b> | 1195 ± 198 | 1025 ± 117 | 702 ± 60   | 658 ± 102  |
| 205737_at   | KCNQ2     | K+ VGC, KQT-like 2                                          | -0.0579          | <b>0.0165</b>     | -0.3753          | 0.0906            | 0.1774        | 3002 ± 309 | 2645 ± 404 | 2203 ± 305 | 2083 ± 214 |
| 200698_at   | KDEL2     | KDEL endoplasmic reticulum protein retention receptor 2     | <b>-0.0349</b>   | 0.1439            | -0.1632          | 0.3752            | 0.2144        | 573 ± 46   | 557 ± 34   | 553 ± 93   | 395 ± 37   |
| 200040_at   | KHDRBS1   | KH domain containing, RNA binding, signal transd. assoc. 1  | <b>-0.0081</b>   | <b>0.0028</b>     | 0.4395           | <b>0.0182</b>     | 0.0563        | 1524 ± 161 | 1641 ± 190 | 1178 ± 120 | 1093 ± 50  |
| 202753_at   | KIAA0107  | 26S proteasome non-ATPase regulatory subunit                | <b>-0.0121</b>   | 0.0856            | -0.2772          | 0.2780            | 0.0835        | 1356 ± 110 | 1281 ± 137 | 961 ± 82   | 1106 ± 136 |
| 212215_at   | KIAA0436  | putative L-type neutral amino acid transporter              | -0.0731          | <b>0.0432</b>     | -0.2785          | -0.3937           | <b>0.0468</b> | 4121 ± 362 | 3701 ± 464 | 4198 ± 214 | 2676 ± 481 |
| 214788_x_at | KIAA0749  | KIAA0749 protein/ Dendrin                                   | <b>-0.0008</b>   | <b>0.0080</b>     | <b>-0.0137</b>   | -0.2660           | 0.0565        | 3347 ± 309 | 3178 ± 591 | 2570 ± 333 | 1852 ± 351 |
| 210616_s_at | KIAA0905  | yeast Sec31p homolog                                        | -0.4756          | <b>0.0264</b>     | -0.1846          | -0.2220           | 0.1029        | 1265 ± 62  | 1270 ± 46  | 1267 ± 51  | 1101 ± 43  |
| 200945_s_at | KIAA0905  | yeast Sec31p homolog                                        | <b>-0.0132</b>   | <b>0.0047</b>     | -0.3342          | -0.2212           | <b>0.0108</b> | 2166 ± 81  | 1972 ± 97  | 1952 ± 102 | 1608 ± 156 |
| 215518_at   | KIAA1006  | tomosyn-like                                                | <b>-0.0015</b>   | <b>0.0020</b>     | <b>-0.0208</b>   | 0.0694            | <b>0.0480</b> | 605 ± 42   | 628 ± 57   | 525 ± 44   | 446 ± 44   |
| 212163_at   | KIDINS220 | likely homolog of rat kinase D-interacting substance        | <b>-0.0261</b>   | <b>0.0233</b>     | 0.4004           | 0.3889            | <b>0.0088</b> | 2276 ± 58  | 2107 ± 68  | 1908 ± 62  | 1641 ± 238 |
| 209234_at   | KIF1B     | kinesin family member 1B                                    | <b>-0.0038</b>   | 0.1867            | <b>-0.0227</b>   | 0.2863            | 0.4746        | 5189 ± 229 | 4970 ± 315 | 4743 ± 209 | 4688 ± 277 |
| 203087_s_at | KIF2      | kinesin heavy chain member 2                                | -0.0631          | <b>0.0365</b>     | 0.4930           | -0.2882           | 0.0784        | 710 ± 34   | 698 ± 73   | 600 ± 22   | 538 ± 62   |
| 203389_at   | KIF3C     | kinesin family member 3C                                    | <b>-0.0286</b>   | <b>0.0237</b>     | -0.4724          | 0.1346            | <b>0.0436</b> | 2242 ± 292 | 1719 ± 177 | 1508 ± 161 | 1426 ± 151 |
| 203129_s_at | KIF5C     | kinesin family member 5C                                    | <b>-0.0269</b>   | 0.0934            | -0.3165          | -0.2285           | 0.3600        | 1174 ± 84  | 1206 ± 109 | 989 ± 104  | 1013 ± 115 |
| 203130_s_at | KIF5C     | kinesin family member 5C                                    | <b>-0.0446</b>   | 0.1471            | <b>-0.0291</b>   | 0.4904            | 0.4423        | 9415 ± 336 | 8693 ± 827 | 8447 ± 608 | 8112 ± 467 |
| 203333_at   | KIFAP3    | kinesin-associated protein 3                                | <b>-0.0155</b>   | <b>0.0191</b>     | -0.4195          | 0.1154            | 0.1020        | 1100 ± 182 | 856 ± 128  | 669 ± 68   | 637 ± 162  |
| 205051_s_at | KIT       | v-kit Hardy-Zuckerman 4 feline sarcoma viral oncog. homolog | <b>-0.0041</b>   | <b>0.0027</b>     | 0.2804           | 0.3225            | <b>0.0200</b> | 1882 ± 310 | 1350 ± 286 | 778 ± 44   | 1034 ± 200 |
| 205978_at   | KL        | klotho                                                      | <b>-0.0003</b>   | <b>0.0033</b>     | 0.3164           | -0.4851           | <b>0.0238</b> | 435 ± 84   | 390 ± 87   | 267 ± 41   | 143 ± 32   |
| 212877_at   | KNS2      | kinesin 2 60/70kDa                                          | -0.0828          | <b>0.0204</b>     | -0.3794          | 0.1587            | 0.1179        | 2289 ± 394 | 1697 ± 330 | 1382 ± 231 | 1219 ± 328 |
| 212878_s_at | KNS2      | kinesin 2 60/70kDa                                          | -0.1316          | <b>0.0477</b>     | -0.3089          | 0.1352            | 0.2105        | 1692 ± 311 | 1254 ± 208 | 1092 ± 142 | 1020 ± 263 |
| 201088_at   | KPNA2     | karyopherin alpha 2                                         | <b>-0.0066</b>   | <b>0.0081</b>     | -0.1845          | -0.4971           | <b>0.0015</b> | 2522 ± 177 | 2083 ± 197 | 1668 ± 155 | 1585 ± 143 |
| 211762_s_at | KPNA2     | karyopherin alpha 2                                         | <b>-0.0060</b>   | <b>0.0057</b>     | -0.2107          | 0.3263            | <b>0.0223</b> | 828 ± 61   | 695 ± 98   | 529 ± 35   | 522 ± 93   |
| 221502_at   | KPNA3     | karyopherin alpha 3                                         | <b>-0.0138</b>   | <b>0.0084</b>     | 0.0589           | -0.1254           | <b>0.0502</b> | 2414 ± 124 | 2197 ± 205 | 2077 ± 141 | 1716 ± 219 |
| 208975_s_at | KPNB1     | karyopherin beta 1                                          | <b>-0.0132</b>   | <b>0.0031</b>     | -0.4496          | 0.3078            | <b>0.0362</b> | 506 ± 21   | 527 ± 69   | 404 ± 16   | 365 ± 40   |
| 211952_at   | KPNB3     | karyopherin beta 3                                          | <b>-0.0139</b>   | 0.1522            | -0.1459          | 0.2778            | 0.1613        | 520 ± 25   | 428 ± 29   | 467 ± 50   | 395 ± 52   |
| 204584_at   | L1CAM     | L1 cell adhesion molecule syndrome, spastic paraplegia 1)   | <b>-0.0373</b>   | <b>0.0373</b>     | -0.3482          | 0.2040            | <b>0.0145</b> | 1150 ± 186 | 1054 ± 148 | 613 ± 53   | 597 ± 40   |



| Probe set   | Name      | Description                                           | NFT <sub>0</sub> | MMSE <sub>0</sub> | NFT <sub>1</sub> | MMSE <sub>1</sub> | ANOVA         | Control    | Incipient  | Moderate   | Severe     |
|-------------|-----------|-------------------------------------------------------|------------------|-------------------|------------------|-------------------|---------------|------------|------------|------------|------------|
| 211597_s_at | LAGY      | lung cancer-associated Y protein                      | <b>-0.0129</b>   | <b>0.0060</b>     | 0.2778           | 0.1769            | 0.1144        | 2302 ± 194 | 1797 ± 154 | 1639 ± 221 | 1573 ± 332 |
| 202020_s_at | LANCL1    | LanC lantibiotic synthetase component C-like 1        | <b>-0.0101</b>   | 0.1851            | -0.3821          | 0.4683            | 0.5044        | 4720 ± 276 | 4653 ± 622 | 4430 ± 364 | 3857 ± 465 |
| 215543_s_at | LARGE     | like-glycosyltransferase                              | <b>-0.0087</b>   | <b>0.0010</b>     | -0.3993          | 0.1717            | 0.0571        | 1140 ± 101 | 1081 ± 158 | 834 ± 66   | 770 ± 87   |
| 214039_s_at | LC27      | putative integral membrane transporter                | <b>-0.0154</b>   | 0.4047            | 0.2847           | -0.1397           | 0.5371        | 2458 ± 147 | 2600 ± 299 | 2326 ± 93  | 2187 ± 221 |
| 206481_s_at | LDB2      | LIM domain binding 2                                  | <b>-0.0002</b>   | <b>0.0015</b>     | -0.0827          | -0.3715           | <b>0.0074</b> | 1740 ± 347 | 1243 ± 204 | 796 ± 104  | 560 ± 95   |
| 200650_s_at | LDHA      | lactate dehydrogenase A                               | <b>-0.0092</b>   | <b>0.0320</b>     | -0.4322          | 0.3628            | <b>0.0054</b> | 5673 ± 285 | 4997 ± 758 | 4079 ± 292 | 3184 ± 540 |
| 204454_at   | LDOC1     | leucine zipper, down-regulated in cancer 1            | <b>-0.0214</b>   | 0.0792            | -0.3766          | 0.3726            | 0.1781        | 2494 ± 326 | 2308 ± 440 | 1660 ± 111 | 1850 ± 203 |
| 209867_s_at | LEC3      | KIAA0768 protein                                      | <b>-0.0021</b>   | <b>0.0067</b>     | <b>-0.0271</b>   | -0.4897           | 0.0902        | 719 ± 65   | 633 ± 76   | 647 ± 98   | 425 ± 80   |
| 203619_s_at | LFG       | lifeguard                                             | <b>0.0000</b>    | <b>0.0033</b>     | <b>-0.0256</b>   | -0.3466           | <b>0.0416</b> | 2634 ± 203 | 2468 ± 295 | 2140 ± 163 | 1807 ± 135 |
| 208936_x_at | LGALS8    | lectin, galactoside-binding, soluble, 8               | <b>-0.0056</b>   | <b>0.0037</b>     | -0.4613          | 0.1241            | <b>0.0073</b> | 532 ± 12   | 528 ± 40   | 388 ± 35   | 379 ± 57   |
| 208934_s_at | LGALS8    | lectin, galactoside-binding, soluble, 8               | <b>-0.0102</b>   | <b>0.0088</b>     | 0.4526           | 0.1155            | <b>0.0242</b> | 354 ± 37   | 301 ± 36   | 222 ± 27   | 201 ± 49   |
| 211219_s_at | LHX2      | LIM homeobox protein 2                                | <b>-0.0293</b>   | 0.0822            | 0.4641           | 0.2976            | 0.3964        | 464 ± 31   | 451 ± 23   | 369 ± 59   | 373 ± 66   |
| 209205_s_at | LMO4      | LIM domain only 4                                     | <b>-0.0432</b>   | <b>0.0057</b>     | 0.3782           | -0.1588           | <b>0.0324</b> | 3592 ± 560 | 2627 ± 498 | 1970 ± 239 | 1845 ± 387 |
| 213510_x_at | LOC220594 | TL132 protein                                         | <b>-0.0384</b>   | 0.5947            | 0.2075           | <b>-0.0214</b>    | 0.6152        | 2490 ± 121 | 2565 ± 153 | 2429 ± 226 | 2220 ± 211 |
| 219363_s_at | LOC51001  | CGI-12 protein                                        | <b>-0.0019</b>   | <b>0.0013</b>     | 0.4726           | -0.4585           | <b>0.0060</b> | 416 ± 17   | 431 ± 12   | 384 ± 25   | 318 ± 26   |
| 218628_at   | LOC51019  | CGI-116 protein                                       | <b>-0.0326</b>   | 0.5029            | -0.2642          | -0.0944           | 0.5482        | 408 ± 25   | 434 ± 72   | 436 ± 27   | 338 ± 73   |
| 218193_s_at | LOC51026  | CGI-141 protein                                       | -0.0662          | <b>0.0287</b>     | -0.3640          | 0.4606            | 0.0793        | 254 ± 17   | 239 ± 21   | 214 ± 22   | 169 ± 31   |
| 209092_s_at | LOC51031  | CGI-150 protein                                       | <b>-0.0073</b>   | <b>0.0070</b>     | 0.1319           | 0.2019            | <b>0.0026</b> | 738 ± 55   | 652 ± 72   | 571 ± 64   | 369 ± 42   |
| 219065_s_at | LOC51072  | C21orf19-like protein                                 | <b>-0.0034</b>   | 0.7906            | -0.1375          | -0.3174           | 0.7946        | 708 ± 20   | 670 ± 53   | 657 ± 27   | 652 ± 67   |
| 217748_at   | LOC51094  | CGI-45 protein                                        | <b>-0.0424</b>   | <b>0.0340</b>     | 0.4373           | -0.0725           | <b>0.0130</b> | 1141 ± 45  | 1214 ± 78  | 994 ± 28   | 985 ± 51   |
| 203721_s_at | LOC51096  | CGI-48 protein                                        | <b>-0.0007</b>   | 0.1188            | -0.1623          | <b>0.0444</b>     | 0.1178        | 783 ± 50   | 697 ± 16   | 621 ± 19   | 667 ± 83   |
| 201825_s_at | LOC51097  | CGI-49 protein                                        | <b>-0.0471</b>   | 0.2683            | -0.3802          | -0.2278           | <b>0.0524</b> | 488 ± 40   | 484 ± 53   | 320 ± 31   | 417 ± 64   |
| 218664_at   | LOC51102  | CGI-63 protein                                        | <b>-0.0135</b>   | <b>0.0156</b>     | 0.4146           | 0.4646            | <b>0.0255</b> | 237 ± 18   | 283 ± 17   | 244 ± 20   | 146 ± 49   |
| 218059_at   | LOC51123  | HSPC038 protein                                       | <b>-0.0401</b>   | 0.4048            | <b>0.0097</b>    | <b>-0.0067</b>    | <b>0.0004</b> | 1544 ± 49  | 1855 ± 57  | 1203 ± 79  | 1552 ± 126 |
| 217720_at   | LOC51142  | 16.7Kd protein                                        | <b>-0.0265</b>   | 0.0969            | -0.4313          | 0.1931            | 0.1023        | 5411 ± 491 | 4552 ± 626 | 3525 ± 209 | 4180 ± 696 |
| 219212_at   | LOC51182  | likely ortholog of mouse heat shock protein, 70 kDa 4 | <b>-0.0317</b>   | <b>0.0224</b>     | -0.0907          | 0.2725            | 0.1240        | 294 ± 42   | 260 ± 45   | 185 ± 31   | 168 ± 50   |
| 218671_s_at | LOC51189  | ATPase inhibitor precursor                            | <b>-0.0214</b>   | 0.0607            | 0.4905           | -0.2050           | 0.3419        | 903 ± 86   | 923 ± 113  | 798 ± 79   | 682 ± 121  |
| 218657_at   | LOC51195  | Link guanine nucleotide exchange factor II            | -0.1778          | <b>0.0184</b>     | <b>-0.0451</b>   | <b>0.0488</b>     | <b>0.0305</b> | 760 ± 53   | 459 ± 72   | 633 ± 128  | 377 ± 110  |
| 220890_s_at | LOC51202  | hqp0256 protein                                       | <b>-0.0156</b>   | <b>0.0362</b>     | -0.2420          | -0.2503           | 0.0973        | 917 ± 34   | 821 ± 77   | 812 ± 45   | 720 ± 60   |
| 221069_s_at | LOC51204  | clone HQ0477 PRO0477p                                 | -0.5506          | <b>0.0201</b>     | -0.4025          | 0.1120            | 0.2245        | 362 ± 30   | 334 ± 11   | 311 ± 25   | 290 ± 26   |
| 218915_at   | LOC51219  | clone FLB5214                                         | <b>-0.0481</b>   | 0.0815            | -0.1092          | 0.1043            | 0.3074        | 1333 ± 145 | 1144 ± 122 | 1190 ± 31  | 1036 ± 86  |
| 218135_at   | LOC51290  | CDA14                                                 | <b>-0.0061</b>   | <b>0.0187</b>     | 0.3293           | -0.1997           | 0.0999        | 548 ± 29   | 510 ± 46   | 484 ± 20   | 420 ± 47   |
| 217990_at   | LOC51292  | GMPR2 for guanosine monophosphate reductase isolog    | -0.0575          | <b>0.0338</b>     | 0.0754           | -0.0959           | 0.0894        | 640 ± 20   | 636 ± 60   | 584 ± 21   | 487 ± 67   |
| 205331_s_at | LOC51308  | SGC32445 protein                                      | -0.1475          | <b>0.0292</b>     | 0.4047           | 0.2224            | 0.1718        | 721 ± 52   | 796 ± 91   | 743 ± 76   | 573 ± 49   |
| 219872_at   | LOC51313  | AD021 protein                                         | -0.4511          | <b>0.0442</b>     | 0.1116           | 0.1389            | 0.2708        | 93 ± 14    | 85 ± 15    | 80 ± 19    | 49 ± 16    |
| 221488_s_at | LOC51596  | divalent cation tolerant protein CUTA                 | <b>-0.0174</b>   | 0.1974            | 0.3259           | 0.3374            | 0.2527        | 3518 ± 253 | 3562 ± 235 | 2957 ± 75  | 3196 ± 292 |
| 201973_s_at | LOC51622  | CGI-43 protein                                        | <b>-0.0414</b>   | <b>0.0150</b>     | -0.2863          | 0.0971            | <b>0.0446</b> | 2750 ± 146 | 2793 ± 181 | 2536 ± 108 | 2178 ± 188 |
| 203763_at   | LOC51626  | CGI-60 protein                                        | -0.1172          | <b>0.0009</b>     | 0.0572           | -0.3188           | <b>0.0179</b> | 437 ± 36   | 462 ± 43   | 377 ± 41   | 280 ± 35   |
| 203762_s_at | LOC51626  | CGI-60 protein                                        | -0.0721          | <b>0.0086</b>     | 0.3567           | 0.3152            | 0.0763        | 300 ± 49   | 235 ± 28   | 204 ± 44   | 144 ± 33   |

| Probe set   | Name      | Description                                              | NFT <sub>0</sub> | MMSE <sub>0</sub> | NFT <sub>1</sub> | MMSE <sub>1</sub> | ANOVA         | Control     | Incipient   | Moderate    | Severe     |
|-------------|-----------|----------------------------------------------------------|------------------|-------------------|------------------|-------------------|---------------|-------------|-------------|-------------|------------|
| 218732_at   | LOC51651  | CGI-147 protein                                          | <b>-0.0060</b>   | 0.1236            | 0.0673           | -0.3140           | 0.0950        | 419 ± 27    | 458 ± 6     | 340 ± 32    | 343 ± 60   |
| 215691_x_at | LOC51668  | HSPCO34 protein                                          | -0.1426          | <b>0.0099</b>     | 0.4755           | 0.1328            | <b>0.0148</b> | 1060 ± 77   | 878 ± 36    | 916 ± 40    | 782 ± 30   |
| 203960_s_at | LOC51668  | HSPCO34 protein                                          | -0.0671          | <b>0.0149</b>     | -0.4219          | 0.2746            | 0.1197        | 166 ± 21    | 155 ± 18    | 125 ± 26    | 89 ± 28    |
| 217811_at   | LOC51714  | selenoprotein T                                          | <b>-0.0356</b>   | <b>0.0094</b>     | -0.2472          | -0.4963           | 0.0779        | 1080 ± 125  | 956 ± 95    | 736 ± 96    | 694 ± 142  |
| 220046_s_at | LOC57018  | cyclin L ania-6a                                         | <b>-0.0176</b>   | 0.5403            | <b>-0.0028</b>   | 0.4446            | 0.1491        | 851 ± 54    | 707 ± 32    | 702 ± 33    | 755 ± 78   |
| 221679_s_at | LOC57406  | lipase protein                                           | -0.1809          | <b>0.0211</b>     | -0.1301          | 0.2143            | 0.1288        | 154 ± 32    | 157 ± 31    | 139 ± 16    | 71 ± 25    |
| 45288_at    | LOC57406  | lipase protein                                           | <b>-0.0287</b>   | <b>0.0117</b>     | 0.1829           | 0.1629            | <b>0.0178</b> | 1012 ± 41   | 915 ± 40    | 867 ± 37    | 805 ± 55   |
| 221020_s_at | LOC81034  | folate transporter/carrier                               | <b>-0.0162</b>   | <b>0.0047</b>     | -0.4168          | 0.2421            | 0.0596        | 450 ± 62    | 369 ± 17    | 342 ± 9     | 276 ± 44   |
| 206953_s_at | LPHH1     | latrophilin 1                                            | <b>-0.0127</b>   | <b>0.0020</b>     | 0.0665           | -0.3828           | <b>0.0322</b> | 387 ± 42    | 327 ± 44    | 306 ± 21    | 213 ± 42   |
| 219643_at   | LRP1B     | low density lipoprotein-related protein 1B               | <b>-0.0047</b>   | <b>0.0216</b>     | 0.2200           | -0.3432           | <b>0.0119</b> | 685 ± 73    | 705 ± 54    | 628 ± 62    | 404 ± 53   |
| 205282_at   | LRP8      | low density lipoprotein receptor-related protein 8       | <b>-0.0340</b>   | <b>0.0214</b>     | -0.4762          | 0.2861            | 0.0920        | 476 ± 41    | 481 ± 48    | 421 ± 28    | 342 ± 48   |
| 211971_s_at | LRPPRC    | leucine-rich PPR-motif containing                        | -0.0824          | <b>0.0091</b>     | 0.4138           | 0.3324            | 0.0602        | 982 ± 112   | 1016 ± 109  | 845 ± 21    | 669 ± 54   |
| 209840_s_at | LRRN3     | leucine-rich repeat protein, neuronal 3                  | -0.0560          | <b>0.0405</b>     | 0.3458           | -0.0574           | 0.0842        | 461 ± 37    | 507 ± 57    | 461 ± 33    | 343 ± 46   |
| 202209_at   | LSM3      | Lsm3 protein                                             | <b>-0.0355</b>   | <b>0.0075</b>     | 0.3358           | 0.2455            | 0.1840        | 710 ± 49    | 696 ± 76    | 584 ± 46    | 545 ± 81   |
| 202736_s_at | LSM4      | U6 snRNA-associated Sm-like protein                      | <b>-0.0249</b>   | 0.1251            | -0.4933          | -0.4034           | 0.2614        | 415 ± 35    | 469 ± 21    | 382 ± 27    | 344 ± 75   |
| 211747_s_at | LSM5      | U6 snRNA-associated Sm-like protein                      | <b>-0.0108</b>   | 0.0794            | 0.4092           | -0.2786           | 0.2686        | 460 ± 26    | 480 ± 33    | 391 ± 14    | 388 ± 69   |
| 202904_s_at | LSM5      | U6 snRNA-associated Sm-like protein                      | <b>-0.0187</b>   | <b>0.0002</b>     | -0.2231          | 0.1074            | <b>0.0151</b> | 92 ± 9      | 95 ± 9      | 93 ± 7      | 55 ± 6     |
| 218729_at   | LXN       | latexin protein                                          | <b>-0.0155</b>   | 0.1529            | -0.4764          | 0.3223            | 0.1136        | 139 ± 20    | 111 ± 15    | 65 ± 16     | 94 ± 33    |
| 219042_at   | LZTS1     | leucine zipper, putative tumor suppressor 1              | <b>-0.0492</b>   | <b>0.0008</b>     | -0.4643          | 0.0945            | <b>0.0024</b> | 350 ± 44    | 266 ± 29    | 253 ± 46    | 118 ± 22   |
| 47550_at    | LZTS1     | leucine zipper, putative tumor suppressor 1              | <b>-0.0046</b>   | <b>0.0021</b>     | 0.2507           | -0.4562           | <b>0.0242</b> | 558 ± 38    | 504 ± 56    | 462 ± 47    | 359 ± 30   |
| 212716_s_at | M9        | muscle specific gene                                     | <b>-0.0036</b>   | <b>0.0046</b>     | -0.4584          | 0.3427            | <b>0.0120</b> | 1812 ± 153  | 1708 ± 148  | 1434 ± 93   | 1186 ± 79  |
| 210501_x_at | M9        | muscle specific gene                                     | <b>-0.0051</b>   | <b>0.0091</b>     | -0.3337          | 0.1736            | <b>0.0154</b> | 1979 ± 170  | 1775 ± 185  | 1597 ± 92   | 1251 ± 79  |
| 221494_x_at | M9        | muscle specific gene                                     | <b>-0.0160</b>   | <b>0.0095</b>     | 0.2801           | 0.3368            | <b>0.0501</b> | 2060 ± 141  | 1816 ± 197  | 1684 ± 138  | 1446 ± 56  |
| 209704_at   | M96       | likely ortholog of m. metal resp. element binding t.f. 2 | -0.0781          | <b>0.0340</b>     | <b>0.0307</b>    | -0.2700           | 0.0634        | 100 ± 9     | 122 ± 12    | 103 ± 11    | 74 ± 14    |
| 209014_at   | MAGED1    | melanoma antigen, family D, 1                            | <b>-0.0033</b>   | <b>0.0015</b>     | 0.2771           | 0.4525            | <b>0.0369</b> | 3178 ± 433  | 2993 ± 317  | 2108 ± 176  | 2053 ± 181 |
| 219894_at   | MAGEL2    | MAGE-like 2                                              | -0.1227          | <b>0.0232</b>     | 0.4401           | 0.0626            | 0.3472        | 260 ± 29    | 219 ± 17    | 203 ± 36    | 186 ± 32   |
| 221760_at   | MAN1A1    | mannosidase, alpha, class 1A, member 1                   | <b>-0.0251</b>   | <b>0.0034</b>     | <b>-0.0281</b>   | <b>0.0459</b>     | <b>0.0099</b> | 1111 ± 134  | 1039 ± 197  | 703 ± 68    | 531 ± 73   |
| 212741_at   | MAOA      | monoamine oxidase A                                      | <b>-0.0452</b>   | <b>0.0185</b>     | -0.4700          | 0.1163            | <b>0.0208</b> | 1373 ± 102  | 1190 ± 59   | 1159 ± 76   | 993 ± 58   |
| 212508_at   | MAP-1     | modulator of apoptosis 1                                 | <b>-0.0403</b>   | <b>0.0202</b>     | <b>-0.0292</b>   | 0.1064            | <b>0.0272</b> | 3675 ± 630  | 2771 ± 366  | 1647 ± 146  | 2163 ± 459 |
| 203151_at   | MAP1A     | microtubule-associated protein 1A                        | -0.2343          | <b>0.0081</b>     | -0.3772          | 0.1957            | 0.0963        | 11713 ± 600 | 1413 ± 1101 | 1388 ± 1115 | 8799 ± 488 |
| 202670_at   | MAP2K1    | mitogen-activated protein kinase kinase 1                | -0.0653          | <b>0.0425</b>     | 0.4379           | 0.0944            | 0.1021        | 2563 ± 551  | 1749 ± 385  | 1204 ± 88   | 1449 ± 403 |
| 217971_at   | MAP2K1IP1 | mitogen-activated protein kinase kinase 1 interacting 1  | -0.1034          | <b>0.0370</b>     | -0.2423          | 0.3544            | 0.1706        | 586 ± 30    | 599 ± 25    | 518 ± 32    | 484 ± 63   |
| 203266_s_at | MAP2K4    | mitogen-activated protein kinase kinase 4                | <b>-0.0172</b>   | <b>0.0071</b>     | -0.4511          | -0.4046           | <b>0.0378</b> | 1519 ± 123  | 1249 ± 198  | 936 ± 93    | 1072 ± 171 |
| 218311_at   | MAP4K3    | mitogen-activated protein kinase kinase kinase 3         | <b>-0.0286</b>   | 0.1537            | 0.2173           | -0.4260           | 0.3954        | 587 ± 58    | 562 ± 64    | 479 ± 38    | 479 ± 62   |
| 212271_at   | MAPK1     | mitogen-activated protein kinase 1                       | <b>-0.0209</b>   | 0.0785            | -0.2387          | 0.1111            | 0.3031        | 2107 ± 208  | 1703 ± 270  | 1471 ± 231  | 1562 ± 348 |
| 204813_at   | MAPK10    | mitogen-activated protein kinase 10                      | <b>-0.0432</b>   | 0.1331            | 0.2602           | 0.4829            | 0.3283        | 2161 ± 145  | 2139 ± 175  | 1800 ± 144  | 1930 ± 184 |
| 202530_at   | MAPK14    | mitogen-activated protein kinase 14                      | -0.1179          | <b>0.0099</b>     | 0.4739           | 0.1149            | 0.1209        | 508 ± 23    | 480 ± 42    | 468 ± 29    | 401 ± 17   |
| 213014_at   | MAPK8IP1  | mitogen-activated protein kinase 8 interacting protein 1 | <b>-0.0340</b>   | 0.2862            | 0.2459           | 0.0680            | 0.4696        | 217 ± 31    | 189 ± 16    | 158 ± 12    | 187 ± 34   |
| 203218_at   | MAPK9     | mitogen-activated protein kinase 9                       | <b>-0.0439</b>   | <b>0.0247</b>     | -0.3259          | 0.2509            | 0.0858        | 805 ± 82    | 747 ± 87    | 645 ± 44    | 536 ± 82   |

| Probe set   | Name     | Description                                                 | NFT <sub>0</sub> | MMSE <sub>0</sub> | NFT <sub>1</sub> | MMSE <sub>1</sub> | ANOVA         | Control     | Incipient   | Moderate   | Severe      |
|-------------|----------|-------------------------------------------------------------|------------------|-------------------|------------------|-------------------|---------------|-------------|-------------|------------|-------------|
| 214270_s_at | MAPRE3   | microtubule-associated protein, RP/EB family, member 3      | <b>-0.0472</b>   | 0.0614            | -0.4599          | 0.3210            | 0.2952        | 357 ± 56    | 316 ± 50    | 295 ± 36   | 216 ± 60    |
| 203841_x_at | MAPRE3   | microtubule-associated protein, RP/EB family, member 3      | <b>0.0000</b>    | <b>0.0001</b>     | <b>-0.0004</b>   | 0.1363            | 0.0948        | 269 ± 50    | 205 ± 61    | 132 ± 29   | 117 ± 44    |
| 213672_at   | MARS     | methionine-tRNA synthetase                                  | <b>-0.0226</b>   | 0.3944            | -0.1594          | 0.4726            | 0.6085        | 318 ± 38    | 341 ± 50    | 272 ± 43   | 268 ± 46    |
| 201475_x_at | MARS     | methionine-tRNA synthetase                                  | <b>-0.0446</b>   | <b>0.0036</b>     | 0.3505           | 0.2150            | <b>0.0000</b> | 1803 ± 60   | 1457 ± 118  | 1293 ± 46  | 1100 ± 71   |
| 217956_s_at | MASA     | E-1 enzyme                                                  | <b>-0.0234</b>   | <b>0.0007</b>     | 0.0920           | 0.3833            | <b>0.0204</b> | 1996 ± 152  | 2047 ± 77   | 1881 ± 36  | 1455 ± 177  |
| 206267_s_at | MATK     | megakaryocyte-associated tyrosine kinase                    | <b>-0.0206</b>   | 0.1345            | -0.3783          | -0.2390           | 0.2885        | 272 ± 30    | 307 ± 49    | 284 ± 41   | 195 ± 42    |
| 200626_s_at | MATR3    | matrin 3                                                    | -0.0676          | <b>0.0097</b>     | -0.2578          | 0.2684            | 0.0855        | 4287 ± 485  | 4195 ± 251  | 3500 ± 364 | 2701 ± 604  |
| 218440_at   | MCCC1    | methylcrotonoyl-Coenzyme A carboxylase 1                    | <b>-0.0475</b>   | 0.2399            | 0.2557           | -0.3499           | 0.2535        | 569 ± 36    | 614 ± 34    | 565 ± 47   | 499 ± 26    |
| 209623_at   | MCCC2    | methylcrotonoyl-Coenzyme A carboxylase 2                    | <b>-0.0180</b>   | 0.1887            | 0.3108           | 0.3034            | 0.3790        | 912 ± 55    | 895 ± 27    | 754 ± 53   | 812 ± 129   |
| 222036_s_at | MCM4     | MCM4 minichromosome maintenance deficient 4                 | <b>-0.0130</b>   | <b>0.0129</b>     | 0.4999           | 0.2440            | <b>0.0106</b> | 222 ± 24    | 248 ± 14    | 186 ± 15   | 151 ± 20    |
| 218163_at   | MCT-1    | MCT-1 protein                                               | <b>-0.0418</b>   | 0.0853            | -0.4930          | 0.3843            | 0.1596        | 567 ± 87    | 495 ± 97    | 338 ± 38   | 378 ± 84    |
| 200978_at   | MDH1     | malate dehydrogenase 1, NAD                                 | <b>-0.0225</b>   | <b>0.0067</b>     | -0.4993          | 0.2123            | 0.0694        | 6822 ± 1292 | 5583 ± 1159 | 3397 ± 658 | 3337 ± 1012 |
| 213333_at   | MDH2     | malate dehydrogenase 2, NAD                                 | <b>-0.0290</b>   | 0.0646            | -0.2571          | 0.1177            | <b>0.0172</b> | 841 ± 51    | 728 ± 28    | 654 ± 34   | 718 ± 22    |
| 209036_s_at | MDH2     | malate dehydrogenase 2, NAD                                 | <b>-0.0333</b>   | <b>0.0106</b>     | 0.3196           | 0.3564            | <b>0.0251</b> | 1706 ± 193  | 1448 ± 138  | 1135 ± 72  | 1085 ± 178  |
| 218877_s_at | MDS024   | MDS024 protein                                              | <b>-0.0061</b>   | 0.0959            | 0.3106           | 0.4829            | 0.3173        | 410 ± 43    | 399 ± 48    | 339 ± 33   | 304 ± 56    |
| 218597_s_at | MDS029   | uncharacterized hematopoietic stem/progenitor cells MDS029  | -0.0895          | <b>0.0429</b>     | -0.4335          | 0.1578            | 0.1530        | 1009 ± 189  | 709 ± 144   | 639 ± 66   | 585 ± 118   |
| 221706_s_at | MDS032   | uncharacterized hematopoietic stem/progenitor cells MDS032  | -0.1350          | <b>0.0151</b>     | 0.0706           | 0.2262            | 0.0562        | 263 ± 15    | 290 ± 41    | 256 ± 8    | 190 ± 23    |
| 204059_s_at | ME1      | malic enzyme 1, NADP-dependent, cytosolic                   | -0.2868          | <b>0.0186</b>     | 0.3213           | 0.2996            | 0.2666        | 699 ± 32    | 692 ± 20    | 671 ± 50   | 585 ± 61    |
| 204663_at   | ME3      | malic enzyme 3, NADP-dependent, mitochondrial               | -0.1852          | <b>0.0115</b>     | 0.1769           | 0.2631            | 0.1509        | 510 ± 77    | 522 ± 56    | 417 ± 42   | 342 ± 12    |
| 207079_s_at | MED6     | RNA polymerase II transcriptional regulation mediator       | <b>-0.0332</b>   | 0.5551            | -0.3561          | -0.2726           | 0.7401        | 269 ± 15    | 266 ± 32    | 253 ± 26   | 227 ± 43    |
| 212535_at   | MEF2A    | MADS box transcription enhancer factor 2, polypeptide A     | <b>-0.0192</b>   | 0.6612            | <b>-0.0416</b>   | -0.2256           | 0.4413        | 1536 ± 46   | 1513 ± 128  | 1675 ± 133 | 1375 ± 181  |
| 209199_s_at | MEF2C    | MADS box transcription enhancer factor 2, polypeptide C     | <b>-0.0450</b>   | 0.2145            | -0.2858          | <b>-0.0316</b>    | 0.2992        | 668 ± 59    | 749 ± 83    | 625 ± 62   | 562 ± 58    |
| 212732_at   | MEG3     | maternally expressed 3                                      | -0.1756          | <b>0.0205</b>     | -0.3999          | 0.3011            | 0.2164        | 1063 ± 73   | 1062 ± 123  | 1031 ± 128 | 781 ± 83    |
| 203510_at   | MET      | met proto-oncogene                                          | <b>-0.0023</b>   | <b>0.0158</b>     | <b>-0.0349</b>   | -0.2853           | <b>0.0457</b> | 731 ± 191   | 652 ± 190   | 275 ± 45   | 240 ± 72    |
| 212673_at   | METAP1   | methionyl aminopeptidase 1                                  | <b>-0.0418</b>   | 0.1857            | 0.2926           | 0.2774            | 0.3786        | 946 ± 66    | 877 ± 51    | 822 ± 41   | 828 ± 66    |
| 217043_s_at | MFN1     | mitofusin 1                                                 | <b>-0.0095</b>   | 0.2386            | <b>-0.0507</b>   | -0.1041           | 0.2106        | 327 ± 27    | 324 ± 25    | 303 ± 22   | 244 ± 43    |
| 207098_s_at | MFN1     | mitofusin 1                                                 | <b>-0.0095</b>   | <b>0.0143</b>     | <b>-0.0216</b>   | 0.4838            | <b>0.0226</b> | 247 ± 13    | 248 ± 20    | 238 ± 17   | 175 ± 20    |
| 212945_s_at | MGA      | MAX dimerization protein 5                                  | <b>-0.0120</b>   | <b>0.0423</b>     | 0.4682           | -0.3527           | <b>0.0362</b> | 254 ± 36    | 219 ± 15    | 225 ± 36   | 111 ± 27    |
| 217800_s_at | MGC10924 | hypothetical protein MGC10924                               | <b>-0.0276</b>   | <b>0.0013</b>     | 0.4876           | <b>0.0005</b>     | 0.1601        | 3223 ± 379  | 3042 ± 423  | 2440 ± 218 | 2133 ± 455  |
| 212411_at   | MGC19606 | similar to HYPOTHETICAL 34.0 KDA PROTEIN ZK795.3            | <b>-0.0051</b>   | <b>0.0004</b>     | <b>-0.0014</b>   | <b>0.0302</b>     | <b>0.0063</b> | 911 ± 42    | 761 ± 36    | 763 ± 53   | 673 ± 42    |
| 203545_at   | MGC2840  | hypothetical protein MGC2840                                | <b>-0.0177</b>   | <b>0.0033</b>     | -0.1921          | <b>0.0069</b>     | <b>0.0000</b> | 701 ± 15    | 636 ± 19    | 517 ± 19   | 569 ± 18    |
| 220966_x_at | MGC3038  | hypothetical protein similar to actin related protein 2/3 5 | <b>-0.0506</b>   | <b>0.0283</b>     | -0.4716          | 0.4071            | 0.1756        | 1548 ± 158  | 1445 ± 107  | 1260 ± 81  | 1202 ± 102  |
| 200899_s_at | MGEA5    | meningioma expressed antigen 5                              | <b>-0.0275</b>   | 0.7519            | -0.2568          | 0.1994            | 0.8733        | 2114 ± 128  | 1937 ± 176  | 1989 ± 173 | 1954 ± 187  |
| 211026_s_at | MGLL     | monoglyceride lipase                                        | <b>-0.0015</b>   | <b>0.0080</b>     | -0.3895          | 0.4265            | 0.0667        | 2671 ± 109  | 2619 ± 222  | 2221 ± 173 | 2142 ± 133  |
| 201403_s_at | MGST3    | microsomal glutathione S-transferase 3                      | <b>-0.0137</b>   | <b>0.0019</b>     | <b>-0.0088</b>   | <b>0.0224</b>     | <b>0.0493</b> | 4095 ± 297  | 3818 ± 369  | 3422 ± 281 | 2804 ± 353  |
| 209209_s_at | MIG2     | mitogen inducible 2                                         | <b>-0.0057</b>   | 0.0745            | -0.3279          | -0.3744           | 0.1408        | 304 ± 38    | 266 ± 59    | 190 ± 25   | 190 ± 29    |
| 218138_at   | MKKS     | McKusick-Kaufman syndrome                                   | <b>-0.0008</b>   | <b>0.0034</b>     | 0.2264           | 0.3450            | <b>0.0006</b> | 850 ± 26    | 662 ± 68    | 568 ± 29   | 589 ± 52    |
| 201318_s_at | MLCB     | myosin, light polypeptide, regulatory, non-sarcomeric       | <b>-0.0026</b>   | <b>0.0101</b>     | 0.4656           | 0.3700            | <b>0.0274</b> | 1451 ± 65   | 1399 ± 151  | 1156 ± 131 | 916 ± 172   |
| 221474_at   | MLC-B    | myosin regulatory light chain                               | <b>-0.0223</b>   | <b>0.0152</b>     | 0.1860           | 0.2933            | 0.1091        | 4248 ± 449  | 4205 ± 714  | 3291 ± 379 | 2589 ± 574  |

| Probe set   | Name    | Description                                         | NFT <sub>0</sub> | MMSE <sub>0</sub> | NFT <sub>1</sub> | MMSE <sub>1</sub> | ANOVA         | Control    | Incipient   | Moderate   | Severe     |
|-------------|---------|-----------------------------------------------------|------------------|-------------------|------------------|-------------------|---------------|------------|-------------|------------|------------|
| 200948_at   | MLF2    | myeloid leukemia factor 2                           | <b>-0.0239</b>   | 0.0678            | -0.2245          | -0.1881           | 0.2238        | 2621 ± 195 | 2764 ± 300  | 2411 ± 169 | 2102 ± 229 |
| 203414_at   | MMD     | monocyte to macrophage differentiation-associated   | <b>-0.0466</b>   | <b>0.0279</b>     | -0.4554          | 0.2713            | 0.0775        | 4073 ± 602 | 3966 ± 1019 | 2254 ± 250 | 2240 ± 430 |
| 204959_at   | MNDA    | myeloid cell nuclear differentiation antigen        | <b>-0.0468</b>   | 0.3856            | <b>0.0000</b>    | <b>-0.0024</b>    | 0.0823        | 90 ± 7     | 140 ± 19    | 104 ± 27   | 69 ± 15    |
| 217873_at   | MO25    | MO25 protein                                        | <b>-0.0105</b>   | <b>0.0013</b>     | -0.2833          | 0.2293            | 0.0849        | 1409 ± 149 | 1172 ± 151  | 985 ± 73   | 978 ± 150  |
| 218212_s_at | MOCS2   | molybdenum cofactor synthesis 2                     | <b>-0.0526</b>   | <b>0.0175</b>     | -0.2544          | 0.3474            | 0.1032        | 691 ± 51   | 620 ± 84    | 582 ± 42   | 443 ± 99   |
| 209582_s_at | MOX2    | antigen identified by monoclonal antibody MRC OX-2  | <b>-0.0077</b>   | <b>0.0053</b>     | -0.2712          | 0.2555            | <b>0.0115</b> | 309 ± 42   | 260 ± 25    | 204 ± 13   | 174 ± 18   |
| 209583_s_at | MOX2    | antigen identified by monoclonal antibody MRC OX-2  | <b>-0.0089</b>   | <b>0.0063</b>     | -0.0604          | 0.2531            | <b>0.0284</b> | 1448 ± 162 | 1191 ± 134  | 1053 ± 109 | 874 ± 85   |
| 205273_s_at | MP1     | metalloprotease 1                                   | <b>-0.0035</b>   | <b>0.0023</b>     | -0.1599          | -0.4753           | 0.0917        | 891 ± 69   | 873 ± 72    | 724 ± 68   | 660 ± 84   |
| 202974_at   | MPP1    | membrane protein, palmitoylated 1, 55kDa            | <b>-0.0365</b>   | <b>0.0486</b>     | 0.2817           | -0.2191           | <b>0.0250</b> | 916 ± 68   | 890 ± 63    | 764 ± 38   | 623 ± 96   |
| 214071_at   | MPPE1   | metallo phosphoesterase                             | <b>-0.0229</b>   | <b>0.0117</b>     | <b>-0.0429</b>   | 0.3221            | 0.1863        | 314 ± 21   | 346 ± 44    | 296 ± 24   | 226 ± 56   |
| 203466_at   | MPV17   | MpV17 transgene, murine homolog, glomerulosclerosis | <b>-0.0019</b>   | <b>0.0002</b>     | <b>-0.0220</b>   | <b>0.0269</b>     | 0.0767        | 315 ± 46   | 286 ± 69    | 181 ± 51   | 136 ± 47   |
| 204386_s_at | MRP63   | mitochondrial ribosomal protein 63                  | <b>-0.0483</b>   | 0.3436            | -0.4124          | 0.4109            | 0.3709        | 2267 ± 164 | 2117 ± 110  | 1886 ± 111 | 2071 ± 206 |
| 218049_s_at | MRPL13  | mitochondrial ribosomal protein L13                 | <b>-0.0183</b>   | 0.0815            | 0.3909           | 0.1454            | 0.4149        | 237 ± 15   | 216 ± 20    | 198 ± 15   | 181 ± 43   |
| 218027_at   | MRPL15  | mitochondrial ribosomal protein L15                 | <b>-0.0022</b>   | <b>0.0004</b>     | 0.3348           | 0.1211            | <b>0.0001</b> | 692 ± 42   | 522 ± 42    | 394 ± 49   | 399 ± 32   |
| 217980_s_at | MRPL16  | mitochondrial ribosomal protein L16                 | <b>-0.0428</b>   | <b>0.0046</b>     | 0.2555           | 0.4913            | <b>0.0046</b> | 627 ± 42   | 555 ± 12    | 485 ± 55   | 402 ± 9    |
| 217907_at   | MRPL18  | mitochondrial ribosomal protein L18                 | <b>-0.0397</b>   | 0.1117            | 0.4519           | -0.4517           | <b>0.0485</b> | 1080 ± 49  | 1025 ± 68   | 850 ± 29   | 927 ± 89   |
| 203465_at   | MRPL19  | mitochondrial ribosomal protein L19                 | -0.2313          | <b>0.0268</b>     | -0.3700          | 0.2463            | 0.0643        | 172 ± 16   | 178 ± 24    | 188 ± 32   | 100 ± 18   |
| 220526_s_at | MRPL20  | mitochondrial ribosomal protein L20                 | <b>-0.0023</b>   | <b>0.0030</b>     | -0.2427          | 0.2419            | <b>0.0349</b> | 1511 ± 153 | 1513 ± 43   | 1209 ± 109 | 1043 ± 127 |
| 218339_at   | MRPL22  | mitochondrial ribosomal protein L22                 | <b>-0.0332</b>   | 0.8265            | -0.0710          | -0.2524           | 0.8795        | 375 ± 23   | 361 ± 38    | 361 ± 14   | 340 ± 44   |
| 208787_at   | MRPL3   | mitochondrial ribosomal protein L3                  | <b>-0.0023</b>   | <b>0.0002</b>     | 0.0934           | 0.0856            | <b>0.0275</b> | 1304 ± 99  | 1199 ± 125  | 1024 ± 55  | 880 ± 114  |
| 218106_s_at | MRPS10  | mitochondrial ribosomal protein S10                 | -0.0944          | <b>0.0169</b>     | <b>0.0258</b>    | -0.4331           | 0.0617        | 709 ± 47   | 825 ± 50    | 681 ± 24   | 625 ± 67   |
| 221437_s_at | MRPS15  | mitochondrial ribosomal protein S15                 | -0.3056          | <b>0.0267</b>     | -0.2717          | 0.2956            | 0.0923        | 206 ± 25   | 163 ± 30    | 120 ± 18   | 119 ± 38   |
| 219819_s_at | MRPS28  | mitochondrial ribosomal protein S28                 | <b>-0.0275</b>   | 0.1570            | 0.3632           | -0.1572           | 0.3578        | 389 ± 32   | 374 ± 62    | 302 ± 28   | 285 ± 64   |
| 209421_at   | MSH2    | mutS homolog 2, colon cancer, nonpolyposis type 1   | -0.2981          | <b>0.0487</b>     | -0.4509          | -0.4918           | 0.1766        | 255 ± 25   | 208 ± 29    | 197 ± 21   | 176 ± 29   |
| 217772_s_at | MTCH2   | mitochondrial carrier homolog 2                     | <b>-0.0203</b>   | 0.6855            | 0.2472           | 0.4905            | 0.8003        | 592 ± 27   | 599 ± 53    | 536 ± 56   | 586 ± 63   |
| 202309_at   | MTHFD1  | methylenetetrahydrofolate dehydrogenase             | <b>-0.0054</b>   | <b>0.0126</b>     | -0.1471          | 0.2275            | <b>0.0026</b> | 911 ± 76   | 868 ± 86    | 722 ± 34   | 554 ± 44   |
| 216095_x_at | MTMR1   | myotubularin related protein 1                      | <b>-0.0096</b>   | 0.1270            | -0.2918          | 0.3099            | 0.3767        | 1334 ± 78  | 1252 ± 56   | 1249 ± 39  | 1151 ± 95  |
| 212277_at   | MTMR4   | myotubularin related protein 4                      | <b>-0.0251</b>   | 0.4555            | -0.1919          | 0.3735            | 0.3577        | 893 ± 39   | 854 ± 43    | 759 ± 55   | 796 ± 91   |
| 213278_at   | MTMR9   | myotubularin related protein 9                      | -0.0762          | <b>0.0041</b>     | -0.4788          | 0.2304            | <b>0.0424</b> | 1222 ± 67  | 1093 ± 54   | 979 ± 74   | 969 ± 78   |
| 203517_at   | MTX2    | metaxin 2                                           | <b>-0.0250</b>   | <b>0.0019</b>     | -0.3111          | 0.3382            | <b>0.0269</b> | 651 ± 65   | 488 ± 78    | 438 ± 54   | 375 ± 58   |
| 211276_at   | my048   | my048 protein                                       | <b>-0.0012</b>   | <b>0.0006</b>     | -0.1518          | 0.1210            | <b>0.0200</b> | 4285 ± 328 | 3738 ± 337  | 3392 ± 309 | 2771 ± 318 |
| 210016_at   | MYT1L   | myelin transcription factor 1-like                  | <b>-0.0200</b>   | <b>0.0138</b>     | -0.2545          | 0.4071            | <b>0.0097</b> | 4307 ± 343 | 3359 ± 488  | 2698 ± 385 | 2224 ± 531 |
| 219368_at   | NAP1L2  | nucleosome assembly protein 1-like 2                | <b>-0.0071</b>   | <b>0.0274</b>     | -0.2094          | -0.4379           | <b>0.0370</b> | 2608 ± 419 | 1948 ± 373  | 1304 ± 172 | 1302 ± 348 |
| 200027_at   | NARS    | asparaginyl-tRNA synthetase                         | <b>-0.0088</b>   | <b>0.0024</b>     | -0.4416          | 0.2773            | <b>0.0324</b> | 5969 ± 298 | 5177 ± 478  | 5037 ± 112 | 4550 ± 340 |
| 201521_s_at | NCBP2   | nuclear cap binding protein subunit 2, 20kDa        | -0.4544          | <b>0.0299</b>     | -0.2954          | 0.3438            | 0.3870        | 186 ± 15   | 177 ± 22    | 165 ± 27   | 131 ± 26   |
| 209159_s_at | NDRG4   | NDRG family member 4                                | <b>-0.0050</b>   | <b>0.0006</b>     | -0.0851          | 0.0636            | <b>0.0369</b> | 4100 ± 455 | 3612 ± 619  | 2957 ± 380 | 2038 ± 470 |
| 217860_at   | NDUFA10 | NADH dehydrogenase 1 alpha subcomplex, 10, 42kDa    | <b>-0.0434</b>   | <b>0.0368</b>     | 0.3786           | -0.1656           | <b>0.0057</b> | 2018 ± 143 | 1727 ± 104  | 1598 ± 74  | 1384 ± 129 |
| 209224_s_at | NDUFA2  | NADH dehydrogenase 1 alpha subcomplex, 2, 8kDa      | <b>-0.0036</b>   | <b>0.0006</b>     | 0.3884           | 0.2012            | 0.0767        | 1716 ± 111 | 1767 ± 170  | 1625 ± 99  | 1297 ± 134 |
| 218563_at   | NDUFA3  | NADH dehydrogenase 1 alpha subcomplex, 3, 9kDa      | <b>-0.0545</b>   | <b>0.0039</b>     | -0.4208          | 0.0993            | <b>0.0447</b> | 3350 ± 308 | 2820 ± 142  | 2831 ± 265 | 2282 ± 170 |

| Probe set   | Name     | Description                                           | NFT <sub>0</sub> | MMSE <sub>0</sub> | NFT <sub>1</sub> | MMSE <sub>1</sub> | ANOVA         | Control     | Incipient   | Moderate    | Severe      |
|-------------|----------|-------------------------------------------------------|------------------|-------------------|------------------|-------------------|---------------|-------------|-------------|-------------|-------------|
| 217773_s_at | NDUFA4   | NADH dehydrogenase 1 alpha subcomplex, 4, 9kDa        | <b>-0.0144</b>   | <b>0.0013</b>     | 0.4001           | 0.4492            | <b>0.0071</b> | 6163 ± 670  | 5522 ± 595  | 4688 ± 346  | 3212 ± 376  |
| 201304_at   | NDUFA5   | NADH dehydrogenase 1 alpha subcomplex, 5, 13kDa       | <b>-0.0071</b>   | <b>0.0002</b>     | 0.3567           | 0.1482            | <b>0.0095</b> | 2449 ± 361  | 2224 ± 321  | 1732 ± 161  | 988 ± 155   |
| 202785_at   | NDUFA7   | NADH dehydrogenase 1 alpha subcomplex, 7, 14.5kDa     | -0.2010          | <b>0.0456</b>     | -0.3884          | 0.2929            | 0.1759        | 249 ± 37    | 207 ± 66    | 219 ± 38    | 105 ± 40    |
| 218160_at   | NDUFA8   | NADH dehydrogenase 1 alpha subcomplex, 8, 19kDa       | <b>-0.0060</b>   | <b>0.0107</b>     | 0.4807           | -0.3705           | <b>0.0043</b> | 1703 ± 159  | 1552 ± 98   | 1284 ± 79   | 1073 ± 99   |
| 202077_at   | NDUFAB1  | NADH dehydrogenase 1, alpha/beta subcomplex, 1, 8kDa  | <b>-0.0410</b>   | 0.1346            | -0.2825          | -0.4230           | 0.2644        | 2399 ± 265  | 2293 ± 364  | 1626 ± 260  | 1837 ± 366  |
| 206790_s_at | NDUFB1   | NADH dehydrogenase 1 beta subcomplex, 1, 7kDa         | <b>-0.0081</b>   | <b>0.0173</b>     | -0.2001          | 0.1919            | 0.0554        | 3317 ± 277  | 3188 ± 328  | 2827 ± 65   | 2319 ± 282  |
| 218201_at   | NDUFB2   | NADH dehydrogenase 1 beta subcomplex, 2, 8kDa         | <b>-0.0063</b>   | 0.1520            | 0.4852           | -0.4253           | 0.2779        | 1311 ± 73   | 1229 ± 86   | 1132 ± 93   | 1058 ± 135  |
| 218200_s_at | NDUFB2   | NADH dehydrogenase 1 beta subcomplex, 2, 8kDa         | <b>-0.0237</b>   | <b>0.0393</b>     | -0.1550          | 0.4898            | 0.0642        | 3210 ± 265  | 2755 ± 243  | 2524 ± 198  | 2284 ± 261  |
| 203371_s_at | NDUFB3   | NADH dehydrogenase 1 beta subcomplex, 3, 12kDa        | -0.1416          | <b>0.0104</b>     | <b>-0.0468</b>   | <b>0.0024</b>     | <b>0.0302</b> | 1218 ± 95   | 961 ± 31    | 1007 ± 66   | 877 ± 92    |
| 218226_s_at | NDUFB4   | NADH dehydrogenase 1 beta subcomplex, 4, 15kDa        | <b>-0.0197</b>   | <b>0.0142</b>     | -0.4017          | 0.4832            | 0.0593        | 3537 ± 236  | 3153 ± 440  | 2255 ± 156  | 2471 ± 541  |
| 203621_at   | NDUFB5   | NADH dehydrogenase 1 beta subcomplex, 5, 16kDa        | <b>-0.0026</b>   | <b>0.0001</b>     | <b>-0.0405</b>   | 0.1912            | 0.1054        | 1380 ± 145  | 1304 ± 128  | 1092 ± 137  | 909 ± 137   |
| 201227_s_at | NDUFB8   | NADH dehydrogenase 1 beta subcomplex, 8, 19kDa        | -0.1365          | <b>0.0281</b>     | -0.3266          | -0.4453           | <b>0.0533</b> | 4664 ± 273  | 4595 ± 281  | 4721 ± 222  | 3774 ± 221  |
| 201226_at   | NDUFB8   | NADH dehydrogenase 1 beta subcomplex, 8, 19kDa        | <b>-0.0379</b>   | <b>0.0221</b>     | -0.1945          | 0.0709            | <b>0.0007</b> | 2559 ± 119  | 2383 ± 192  | 2165 ± 199  | 1444 ± 95   |
| 218101_s_at | NDUFC2   | NADH dehydrogenase 1, subcomplex unknown, 2, 14.5kDa  | <b>-0.0241</b>   | 0.0889            | 0.4872           | 0.4107            | 0.2271        | 3256 ± 364  | 2834 ± 422  | 2387 ± 244  | 2325 ± 404  |
| 201966_at   | NDUFS2   | NADH dehydrogenase Fe-S protein 2, 49kDa              | <b>-0.0469</b>   | <b>0.0066</b>     | 0.2873           | 0.3658            | 0.1620        | 1533 ± 101  | 1437 ± 125  | 1245 ± 63   | 1249 ± 138  |
| 201740_at   | NDUFS3   | NADH dehydrogenase Fe-S protein 3, 30kDa              | <b>-0.0299</b>   | <b>0.0107</b>     | 0.4564           | 0.1919            | 0.0721        | 1888 ± 202  | 1832 ± 172  | 1513 ± 128  | 1282 ± 174  |
| 209303_at   | NDUFS4   | NADH dehydrogenase Fe-S protein 4, 18kDa              | <b>-0.0010</b>   | <b>0.0002</b>     | 0.4638           | 0.3367            | <b>0.0113</b> | 870 ± 127   | 679 ± 76    | 454 ± 25    | 502 ± 58    |
| 202941_at   | NDUFV2   | NADH dehydrogenase flavoprotein 2, 24kDa              | <b>-0.0189</b>   | <b>0.0007</b>     | 0.3506           | 0.1201            | <b>0.0012</b> | 1319 ± 117  | 1252 ± 97   | 970 ± 63    | 753 ± 66    |
| 201840_at   | NEDD8    | neural precursor cell expressed, develop. down-reg. 8 | <b>-0.0509</b>   | <b>0.0349</b>     | <b>-0.0109</b>   | 0.2999            | 0.0880        | 1296 ± 78   | 1003 ± 166  | 1033 ± 79   | 817 ± 193   |
| 205113_at   | NEF3     | neurofilament 3                                       | <b>-0.0257</b>   | <b>0.0041</b>     | 0.4448           | 0.1919            | <b>0.0111</b> | 4061 ± 648  | 3177 ± 430  | 2827 ± 587  | 1320 ± 203  |
| 33767_at    | NEFH     | neurofilament, heavy polypeptide 200kDa               | -0.1762          | <b>0.0214</b>     | -0.4405          | 0.0567            | 0.0786        | 2478 ± 444  | 1742 ± 392  | 2283 ± 617  | 817 ± 213   |
| 204412_s_at | NEFH     | neurofilament, heavy polypeptide 200kDa               | -0.1085          | <b>0.0260</b>     | -0.3640          | -0.4297           | 0.1779        | 780 ± 113   | 873 ± 164   | 582 ± 181   | 422 ± 125   |
| 221805_at   | NEFL     | neurofilament, light polypeptide 68kDa                | <b>-0.0234</b>   | <b>0.0352</b>     | 0.4124           | 0.2082            | <b>0.0383</b> | 4381 ± 1058 | 3055 ± 656  | 2244 ± 574  | 1184 ± 340  |
| 206089_at   | NELL1    | NEL-like 1                                            | -0.0574          | <b>0.0067</b>     | -0.2908          | <b>0.0448</b>     | <b>0.0042</b> | 285 ± 72    | 88 ± 20     | 72 ± 13     | 50 ± 10     |
| 203413_at   | NELL2    | NEL-like 2                                            | <b>-0.0190</b>   | <b>0.0033</b>     | -0.2954          | 0.2036            | 0.1661        | 4911 ± 740  | 4055 ± 797  | 2973 ± 346  | 3149 ± 780  |
| 206949_s_at | NESCA    | nesca protein                                         | -0.1969          | <b>0.0457</b>     | -0.2894          | 0.3162            | <b>0.0259</b> | 1761 ± 77   | 1782 ± 215  | 1217 ± 80   | 1556 ± 148  |
| 217979_at   | NET-6    | transmembrane 4 superfamily member tetraspan NET-6    | <b>-0.0016</b>   | <b>0.0002</b>     | -0.3553          | 0.0663            | <b>0.0359</b> | 3470 ± 405  | 2691 ± 451  | 2277 ± 298  | 1814 ± 427  |
| 218888_s_at | NETO2    | neuropilin and tolloid-like 2                         | <b>-0.0017</b>   | <b>0.0020</b>     | -0.1374          | 0.1561            | <b>0.0046</b> | 617 ± 68    | 501 ± 87    | 367 ± 35    | 273 ± 64    |
| 206282_at   | NEUROD1  | neurogenic differentiation 1                          | <b>-0.0024</b>   | <b>0.0087</b>     | -0.3558          | 0.0902            | <b>0.0017</b> | 681 ± 46    | 546 ± 94    | 334 ± 47    | 351 ± 71    |
| 220045_at   | NEUROD6  | neurogenic differentiation 6                          | <b>-0.0058</b>   | <b>0.0007</b>     | -0.1649          | 0.4237            | <b>0.0141</b> | 1251 ± 143  | 1088 ± 203  | 552 ± 40    | 781 ± 176   |
| 202216_x_at | NFYC     | nuclear transcription factor Y, gamma                 | <b>-0.0018</b>   | <b>0.0080</b>     | -0.2709          | 0.3458            | <b>0.0039</b> | 327 ± 28    | 343 ± 13    | 304 ± 17    | 215 ± 19    |
| 217963_s_at | NGFRAP1  | nerve growth factor receptor associated protein 1     | <b>-0.0051</b>   | <b>0.0000</b>     | -0.0980          | <b>0.0174</b>     | <b>0.0515</b> | 4275 ± 1218 | 2004 ± 1573 | 1560 ± 1114 | 8777 ± 1681 |
| 201077_s_at | NHP2L1   | NHP2 non-histone chromosome protein 2-like 1          | <b>-0.0095</b>   | <b>0.0417</b>     | -0.1985          | -0.3776           | <b>0.0001</b> | 1996 ± 74   | 1860 ± 49   | 1599 ± 43   | 1487 ± 108  |
| 218133_s_at | NIF3L1   | NIF3 NGG1 interacting factor 3-like 1                 | <b>-0.0289</b>   | 0.1257            | -0.4701          | -0.2797           | 0.3518        | 413 ± 40    | 418 ± 61    | 301 ± 47    | 305 ± 95    |
| 202475_at   | NIFIE14  | seven transmembrane domain protein                    | <b>-0.0038</b>   | 0.1706            | <b>-0.0091</b>   | 0.1416            | 0.1809        | 1663 ± 77   | 1554 ± 159  | 1268 ± 99   | 1392 ± 193  |
| 209075_s_at | NIFU     | nitrogen fixation cluster-like                        | <b>-0.0278</b>   | 0.0597            | -0.4466          | 0.1517            | <b>0.0328</b> | 4324 ± 578  | 3463 ± 363  | 2433 ± 141  | 3145 ± 409  |
| 201709_s_at | NIPSNAP1 | nipsnap homolog 1                                     | -0.2214          | <b>0.0386</b>     | 0.2985           | -0.4741           | 0.2267        | 1968 ± 141  | 1988 ± 146  | 1730 ± 237  | 1517 ± 148  |
| 218557_at   | NIT2     | Nit protein 2                                         | -0.1438          | <b>0.0447</b>     | 0.1931           | 0.3439            | 0.2335        | 346 ± 38    | 410 ± 36    | 326 ± 32    | 293 ± 46    |
| 203830_at   | NJMU-R1  | protein kinase Njmu-R1                                | <b>-0.0108</b>   | <b>0.0074</b>     | -0.3828          | -0.1864           | 0.0931        | 58 ± 6      | 59 ± 10     | 34 ± 10     | 37 ± 9      |

| Probe set   | Name   | Description                                                | NFT <sub>0</sub> | MMSE <sub>0</sub> | NFT <sub>1</sub> | MMSE <sub>1</sub> | ANOVA         | Control     | Incipient   | Moderate    | Severe     |
|-------------|--------|------------------------------------------------------------|------------------|-------------------|------------------|-------------------|---------------|-------------|-------------|-------------|------------|
| 201577_at   | NME1   | non-metastatic cells 1, protein expressed in               | <b>-0.0002</b>   | <b>0.0132</b>     | -0.0693          | 0.0805            | <b>0.0177</b> | 1677 ± 98   | 2013 ± 333  | 1526 ± 93   | 996 ± 222  |
| 201268_at   | NME2   | non-metastatic cells 2, protein expressed in               | <b>-0.0145</b>   | <b>0.0032</b>     | -0.2512          | 0.3514            | <b>0.0064</b> | 1952 ± 82   | 1698 ± 146  | 1798 ± 89   | 1366 ± 127 |
| 203103_s_at | NMP200 | nuclear matrix protein NMP200                              | <b>-0.0341</b>   | <b>0.0024</b>     | <b>0.0429</b>    | 0.3751            | <b>0.0176</b> | 1385 ± 113  | 1182 ± 120  | 1138 ± 89   | 879 ± 87   |
| 204239_s_at | NNAT   | neuronatin                                                 | <b>-0.0396</b>   | 0.1151            | 0.0817           | -0.3799           | 0.1211        | 1299 ± 171  | 1763 ± 335  | 1005 ± 133  | 1085 ± 222 |
| 202783_at   | NNT    | nicotinamide nucleotide transhydrogenase                   | <b>-0.0029</b>   | <b>0.0114</b>     | -0.1005          | 0.1905            | <b>0.0063</b> | 341 ± 38    | 362 ± 27    | 314 ± 38    | 174 ± 21   |
| 202784_s_at | NNT    | nicotinamide nucleotide transhydrogenase                   | <b>-0.0013</b>   | <b>0.0122</b>     | -0.1247          | 0.4157            | <b>0.0449</b> | 198 ± 31    | 156 ± 19    | 134 ± 16    | 103 ± 11   |
| 211951_at   | NOLC1  | nucleolar and coiled-body phosphoprotein 1                 | <b>-0.0409</b>   | <b>0.0022</b>     | -0.3290          | 0.3990            | <b>0.0121</b> | 1501 ± 60   | 1406 ± 72   | 1202 ± 68   | 1241 ± 78  |
| 214321_at   | NOV    | nephroblastoma overexpressed gene                          | -0.1281          | <b>0.0404</b>     | 0.2049           | 0.1919            | 0.2718        | 1006 ± 317  | 910 ± 184   | 678 ± 104   | 443 ± 104  |
| 204743_at   | NP25   | neuronal protein                                           | <b>-0.0241</b>   | <b>0.0106</b>     | 0.4970           | 0.4269            | <b>0.0145</b> | 2850 ± 382  | 2492 ± 307  | 2221 ± 204  | 1447 ± 56  |
| 39548_at    | NPAS2  | neuronal PAS domain protein 2                              | -0.5133          | <b>0.0117</b>     | <b>0.0311</b>    | 0.4752            | 0.0715        | 177 ± 11    | 187 ± 20    | 172 ± 9     | 137 ± 4    |
| 39549_at    | NPAS2  | neuronal PAS domain protein 2                              | <b>-0.0119</b>   | <b>0.0014</b>     | -0.2237          | 0.2086            | <b>0.0114</b> | 522 ± 41    | 458 ± 64    | 499 ± 29    | 309 ± 42   |
| 209460_at   | NPD009 | NPD009 protein                                             | -0.1446          | <b>0.0279</b>     | -0.1857          | 0.1349            | <b>0.0510</b> | 2303 ± 212  | 1766 ± 64   | 2044 ± 227  | 1564 ± 55  |
| 201455_s_at | NPEPPS | aminopeptidase puromycin sensitive                         | -0.0614          | <b>0.0161</b>     | -0.1344          | 0.1045            | 0.1133        | 926 ± 91    | 891 ± 58    | 690 ± 86    | 625 ± 142  |
| 206001_at   | NPY    | neuropeptide Y                                             | <b>-0.0072</b>   | <b>0.0138</b>     | -0.3774          | 0.2133            | <b>0.0025</b> | 1142 ± 89   | 1099 ± 195  | 535 ± 42    | 672 ± 126  |
| 210519_s_at | NQO1   | NADH dehydrogenase, quinone 1                              | <b>-0.0358</b>   | 0.2118            | -0.1587          | 0.2682            | 0.3495        | 642 ± 66    | 552 ± 39    | 532 ± 43    | 522 ± 42   |
| 204791_at   | NR2C1  | nuclear receptor subfamily 2, group C, member 1            | <b>-0.0041</b>   | 0.1308            | -0.4607          | -0.3655           | 0.2050        | 472 ± 19    | 454 ± 23    | 431 ± 13    | 402 ± 36   |
| 204081_at   | NRGN   | neurogranin                                                | -0.1228          | <b>0.0144</b>     | 0.4557           | 0.4226            | 0.1521        | 7959 ± 1379 | 7205 ± 1175 | 3415 ± 1423 | 3975 ± 469 |
| 202599_s_at | NRIP1  | nuclear receptor interacting protein 1                     | <b>-0.0056</b>   | <b>0.0128</b>     | -0.4870          | 0.1262            | <b>0.0152</b> | 1262 ± 102  | 1025 ± 115  | 1138 ± 41   | 818 ± 96   |
| 218625_at   | NRN1   | neuritin 1                                                 | <b>-0.0024</b>   | <b>0.0003</b>     | -0.2290          | 0.2579            | <b>0.0422</b> | 3559 ± 427  | 2601 ± 201  | 2165 ± 159  | 2177 ± 540 |
| 209915_s_at | NRXN1  | neurexin 1                                                 | <b>-0.0079</b>   | <b>0.0137</b>     | -0.1905          | -0.3132           | <b>0.0018</b> | 579 ± 84    | 426 ± 80    | 276 ± 46    | 185 ± 48   |
| 209914_s_at | NRXN1  | neurexin 1                                                 | <b>-0.0029</b>   | <b>0.0383</b>     | <b>-0.0535</b>   | 0.1016            | 0.0756        | 560 ± 66    | 470 ± 78    | 368 ± 45    | 327 ± 72   |
| 216096_s_at | NRXN1  | neurexin 1                                                 | <b>-0.0097</b>   | <b>0.0029</b>     | 0.1970           | -0.2620           | <b>0.0116</b> | 283 ± 34    | 184 ± 19    | 191 ± 8     | 176 ± 21   |
| 209025_s_at | NSAP1  | NS1-associated protein 1                                   | <b>-0.0216</b>   | <b>0.0264</b>     | <b>0.0432</b>    | -0.0668           | <b>0.0043</b> | 421 ± 21    | 441 ± 42    | 415 ± 40    | 255 ± 20   |
| 203939_at   | NT5E   | 5'-nucleotidase, ecto                                      | <b>-0.0245</b>   | <b>0.0286</b>     | -0.2781          | 0.1989            | <b>0.0176</b> | 201 ± 9     | 220 ± 22    | 193 ± 30    | 116 ± 22   |
| 208093_s_at | NUDEL  | LIS1-interacting protein NUDEL; endooligopeptidase A       | -0.1093          | <b>0.0245</b>     | -0.0876          | 0.4134            | 0.1349        | 1368 ± 79   | 1202 ± 169  | 1170 ± 142  | 954 ± 76   |
| 219855_at   | NUDT11 | nudix -type motif 11                                       | <b>-0.0020</b>   | <b>0.0004</b>     | -0.1390          | 0.4005            | 0.1961        | 822 ± 117   | 698 ± 107   | 530 ± 129   | 530 ± 81   |
| 205136_s_at | NUFIP1 | nuclear fragile X mental retardation protein interacting 1 | <b>-0.0020</b>   | <b>0.0369</b>     | -0.2454          | -0.1031           | <b>0.0055</b> | 524 ± 17    | 536 ± 22    | 481 ± 19    | 437 ± 10   |
| 209073_s_at | NUMB   | numb homolog                                               | -0.0627          | <b>0.0119</b>     | -0.0953          | -0.4586           | <b>0.0273</b> | 404 ± 19    | 394 ± 17    | 388 ± 19    | 314 ± 30   |
| 202097_at   | NUP153 | nucleoporin 153kDa                                         | <b>-0.0134</b>   | <b>0.0004</b>     | -0.2728          | 0.2734            | 0.0851        | 831 ± 37    | 871 ± 83    | 777 ± 38    | 662 ± 53   |
| 201599_at   | OAT    | ornithine aminotransferase                                 | <b>-0.0105</b>   | <b>0.0067</b>     | 0.4922           | <b>0.0457</b>     | <b>0.0057</b> | 3989 ± 367  | 3826 ± 163  | 3166 ± 292  | 2391 ± 306 |
| 201364_s_at | OAZ2   | ornithine decarboxylase antizyme 2                         | -0.1004          | <b>0.0379</b>     | -0.0793          | 0.3236            | 0.2038        | 1194 ± 102  | 1069 ± 117  | 1035 ± 83   | 847 ± 150  |
| 212461_at   | OAZIN  | ornithine decarboxylase antizyme inhibitor                 | <b>-0.0493</b>   | 0.0727            | 0.3947           | 0.3702            | 0.1639        | 1273 ± 105  | 1195 ± 142  | 978 ± 74    | 997 ± 87   |
| 205728_at   | ODZ1   | odz, odd Oz/ten-m homolog 1                                | <b>-0.0164</b>   | <b>0.0062</b>     | -0.0712          | 0.3985            | <b>0.0306</b> | 386 ± 51    | 257 ± 15    | 252 ± 40    | 215 ± 33   |
| 207564_x_at | OGT    | O-linked N-acetylglucosamine transferase                   | <b>-0.0084</b>   | <b>0.0004</b>     | -0.4563          | 0.3596            | <b>0.0238</b> | 555 ± 75    | 450 ± 73    | 458 ± 50    | 243 ± 39   |
| 205591_at   | OLFM1  | olfactomedin 1                                             | <b>-0.0251</b>   | 0.0739            | -0.4644          | 0.0994            | 0.3852        | 6279 ± 762  | 5627 ± 798  | 5286 ± 494  | 4436 ± 725 |
| 207093_s_at | OMG    | oligodendrocyte myelin glycoprotein                        | <b>-0.0155</b>   | 0.2818            | -0.3327          | -0.2008           | 0.5925        | 2977 ± 180  | 3050 ± 321  | 2794 ± 229  | 2606 ± 241 |
| 214306_at   | OPA1   | optic atrophy 1                                            | -0.2031          | <b>0.0313</b>     | -0.3732          | <b>0.0246</b>     | 0.1938        | 883 ± 65    | 859 ± 76    | 909 ± 91    | 677 ± 49   |
| 212214_at   | OPA1   | optic atrophy 1                                            | <b>-0.0093</b>   | <b>0.0040</b>     | 0.3319           | 0.1592            | <b>0.0053</b> | 1264 ± 89   | 1152 ± 77   | 988 ± 66    | 857 ± 74   |
| 212213_x_at | OPA1   | optic atrophy 1                                            | <b>-0.0418</b>   | <b>0.0255</b>     | -0.3638          | 0.0986            | <b>0.0276</b> | 1940 ± 198  | 1709 ± 69   | 1346 ± 122  | 1362 ± 141 |

| Probe set   | Name      | Description                                                 | NFT <sub>0</sub> | MMSE <sub>0</sub> | NFT <sub>1</sub> | MMSE <sub>1</sub> | ANOVA         | Control    | Incipient  | Moderate   | Severe     |
|-------------|-----------|-------------------------------------------------------------|------------------|-------------------|------------------|-------------------|---------------|------------|------------|------------|------------|
| 210028_s_at | ORC3L     | origin recognition complex, subunit 3-like                  | <b>-0.0078</b>   | <b>0.0054</b>     | -0.4835          | 0.0662            | <b>0.0397</b> | 441 ± 40   | 384 ± 36   | 428 ± 38   | 268 ± 58   |
| 204957_at   | ORC5L     | origin recognition complex, subunit 5-like                  | <b>-0.0425</b>   | 0.0823            | <b>-0.0323</b>   | 0.3690            | 0.4154        | 562 ± 18   | 506 ± 62   | 497 ± 34   | 462 ± 48   |
| 219073_s_at | OSBPL10   | oxysterol binding protein-like 10                           | -0.0608          | <b>0.0010</b>     | -0.3575          | 0.4733            | <b>0.0007</b> | 324 ± 34   | 288 ± 50   | 325 ± 28   | 122 ± 14   |
| 202780_at   | OXCT      | 3-oxoacid CoA transferase                                   | <b>-0.0106</b>   | <b>0.0157</b>     | 0.3498           | 0.4755            | <b>0.0185</b> | 1429 ± 195 | 1041 ± 43  | 883 ± 85   | 849 ± 127  |
| 218197_s_at | OXR1      | oxidation resistance 1                                      | <b>-0.0311</b>   | <b>0.0019</b>     | <b>0.0539</b>    | -0.4047           | 0.0559        | 406 ± 72   | 326 ± 53   | 244 ± 37   | 202 ± 38   |
| 201832_s_at | P115      | vesicle docking protein p115                                | <b>-0.0128</b>   | 0.0672            | -0.3007          | 0.4243            | 0.1143        | 978 ± 96   | 858 ± 150  | 654 ± 41   | 653 ± 131  |
| 209175_at   | P125      | Sec23-interacting protein p125                              | <b>-0.0101</b>   | <b>0.0456</b>     | -0.3456          | 0.2038            | <b>0.0041</b> | 343 ± 16   | 369 ± 23   | 308 ± 13   | 275 ± 10   |
| 218320_s_at | P17.3     | neuronal protein 17.3                                       | <b>-0.0130</b>   | <b>0.0255</b>     | 0.4359           | 0.1730            | 0.2742        | 1269 ± 108 | 1360 ± 88  | 1223 ± 60  | 1086 ± 87  |
| 200627_at   | P23       | inactive progesterone receptor, 23 kD                       | <b>-0.0356</b>   | 0.3229            | -0.0748          | -0.3196           | 0.5814        | 3914 ± 362 | 3739 ± 501 | 3559 ± 288 | 3082 ± 473 |
| 201310_s_at | P311      | P311 protein                                                | <b>-0.0241</b>   | <b>0.0082</b>     | -0.2780          | -0.2836           | <b>0.0451</b> | 2591 ± 247 | 2064 ± 73  | 2288 ± 222 | 1723 ± 190 |
| 219825_at   | P450RAI-2 | cytochrome P450 retinoid metabolizing protein               | <b>-0.0156</b>   | <b>0.0352</b>     | <b>-0.0474</b>   | 0.1346            | <b>0.0113</b> | 381 ± 68   | 348 ± 78   | 356 ± 59   | 89 ± 32    |
| 217831_s_at | p47       | p47                                                         | -0.2827          | <b>0.0279</b>     | <b>-0.0362</b>   | 0.2512            | 0.2037        | 381 ± 39   | 345 ± 46   | 331 ± 24   | 270 ± 32   |
| 207543_s_at | P4HA1     | procollagen-proline, 2-oxoglutarate 4-dioxygenase , alpha I | <b>-0.0110</b>   | 0.0648            | -0.0619          | -0.3645           | 0.1284        | 784 ± 116  | 721 ± 66   | 660 ± 45   | 478 ± 72   |
| 208639_x_at | P5        | protein disulfide isomerase-related protein                 | <b>-0.0129</b>   | 0.2781            | <b>-0.0052</b>   | 0.3345            | 0.0898        | 961 ± 72   | 781 ± 73   | 932 ± 97   | 691 ± 47   |
| 207668_x_at | P5        | protein disulfide isomerase-related protein                 | <b>-0.0257</b>   | 0.1825            | <b>-0.0037</b>   | 0.2605            | 0.1631        | 884 ± 84   | 743 ± 92   | 855 ± 87   | 622 ± 45   |
| 200813_s_at | PAFAH1B1  | platelet-activating factor acetylhydrolase, Ib alpha        | <b>-0.0129</b>   | <b>0.0117</b>     | -0.4800          | 0.4024            | 0.0989        | 1369 ± 154 | 1104 ± 121 | 1125 ± 90  | 890 ± 137  |
| 208051_s_at | PAIP1     | polyadenylate binding protein-interacting protein 1         | <b>-0.0267</b>   | <b>0.0141</b>     | -0.4156          | 0.4076            | 0.2375        | 1268 ± 93  | 1295 ± 128 | 1127 ± 119 | 919 ± 198  |
| 209064_x_at | PAIP1     | polyadenylate binding protein-interacting protein 1         | <b>-0.0474</b>   | <b>0.0005</b>     | -0.4297          | <b>0.0191</b>     | 0.1220        | 2361 ± 246 | 1952 ± 195 | 2073 ± 83  | 1464 ± 407 |
| 210076_x_at | PAI-RBP1  | PAI-1 mRNA-binding protein                                  | -0.0715          | <b>0.0091</b>     | -0.0828          | <b>0.0437</b>     | <b>0.0003</b> | 760 ± 53   | 507 ± 44   | 562 ± 22   | 509 ± 26   |
| 214607_at   | PAK3      | p21 -activated kinase 3                                     | <b>-0.0213</b>   | <b>0.0125</b>     | -0.4008          | 0.3293            | <b>0.0403</b> | 3105 ± 117 | 2810 ± 340 | 2598 ± 311 | 2016 ± 192 |
| 219461_at   | PAK6      | p21-activated kinase 6                                      | -0.1484          | <b>0.0085</b>     | 0.1117           | 0.1009            | 0.1197        | 538 ± 46   | 472 ± 46   | 483 ± 60   | 363 ± 41   |
| 202336_s_at | PAM       | peptidylglycine alpha-amidating monooxygenase               | -0.0618          | <b>0.0160</b>     | 0.4777           | 0.2203            | 0.0995        | 3470 ± 502 | 2627 ± 424 | 2615 ± 303 | 1932 ± 393 |
| 212958_x_at | PAM       | peptidylglycine alpha-amidating monooxygenase               | <b>-0.0002</b>   | <b>0.0016</b>     | -0.2800          | 0.2760            | 0.0704        | 2255 ± 227 | 1815 ± 329 | 1599 ± 204 | 1329 ± 226 |
| 218771_at   | PANK4     | pantothenate kinase 4                                       | -0.4683          | <b>0.0294</b>     | -0.3618          | -0.3598           | 0.1265        | 363 ± 31   | 373 ± 34   | 327 ± 25   | 274 ± 19   |
| 204715_at   | PANX1     | pannexin 1                                                  | <b>-0.0343</b>   | 0.0906            | <b>-0.0089</b>   | 0.2841            | 0.0762        | 164 ± 17   | 120 ± 22   | 111 ± 6    | 102 ± 22   |
| 209043_at   | PAPSS1    | 3'-phosphoadenosine 5'-phosphosulfate synthase 1            | <b>-0.0039</b>   | <b>0.0071</b>     | 0.4994           | 0.3565            | <b>0.0100</b> | 2555 ± 140 | 2424 ± 222 | 2112 ± 97  | 1703 ± 237 |
| 217908_s_at | PC326     | PC326 protein                                               | <b>-0.0158</b>   | <b>0.0027</b>     | 0.4009           | 0.2370            | <b>0.0513</b> | 603 ± 82   | 530 ± 53   | 451 ± 43   | 362 ± 40   |
| 221727_at   | PC4       | activated RNA polymerase II transcription cofactor 4        | <b>-0.0078</b>   | <b>0.0122</b>     | -0.3851          | 0.1149            | <b>0.0283</b> | 2553 ± 473 | 2166 ± 448 | 1397 ± 195 | 967 ± 197  |
| 214512_s_at | PC4       | activated RNA polymerase II transcription cofactor 4        | <b>-0.0068</b>   | <b>0.0163</b>     | -0.1728          | 0.4287            | <b>0.0185</b> | 789 ± 101  | 588 ± 96   | 434 ± 43   | 447 ± 90   |
| 212857_x_at | PC4       | activated RNA polymerase II transcription cofactor 4        | <b>-0.0015</b>   | <b>0.0283</b>     | 0.3702           | -0.3935           | <b>0.0489</b> | 4244 ± 257 | 3621 ± 495 | 3166 ± 296 | 2818 ± 434 |
| 203860_at   | PCCA      | propionyl Coenzyme A carboxylase, alpha polypeptide         | <b>-0.0499</b>   | 0.1059            | -0.1605          | 0.1538            | 0.1963        | 297 ± 18   | 247 ± 22   | 226 ± 21   | 243 ± 39   |
| 212694_s_at | PCCB      | propionyl Coenzyme A carboxylase, beta polypeptide          | <b>-0.0049</b>   | <b>0.0251</b>     | -0.0580          | -0.3601           | 0.0763        | 356 ± 28   | 358 ± 47   | 271 ± 23   | 256 ± 37   |
| 210292_s_at | PCDH11X   | protocadherin 11 X-linked                                   | <b>-0.0497</b>   | <b>0.0120</b>     | -0.3257          | -0.2192           | <b>0.0146</b> | 311 ± 36   | 217 ± 51   | 164 ± 25   | 143 ± 26   |
| 210273_at   | PCDH7     | BH-protocadherin                                            | -0.1650          | <b>0.0388</b>     | 0.1026           | 0.3394            | 0.2562        | 873 ± 62   | 941 ± 114  | 771 ± 105  | 699 ± 54   |
| 210674_s_at | PCDHA12   | protocadherin alpha 12                                      | <b>-0.0492</b>   | 0.0954            | -0.4893          | -0.4816           | 0.2197        | 828 ± 93   | 707 ± 97   | 692 ± 62   | 589 ± 47   |
| 213558_at   | PCLO      | piccolo                                                     | -0.1420          | <b>0.0107</b>     | -0.3489          | 0.1684            | 0.1069        | 2361 ± 276 | 2045 ± 296 | 2102 ± 266 | 1348 ± 186 |
| 205202_at   | PCMT1     | protein-L-isoaspartate O-methyltransferase                  | <b>-0.0375</b>   | 0.1014            | 0.4182           | 0.3935            | 0.3436        | 3286 ± 405 | 2972 ± 433 | 2490 ± 231 | 2460 ± 425 |
| 201202_at   | PCNA      | proliferating cell nuclear antigen                          | <b>-0.0342</b>   | 0.3086            | -0.2987          | -0.0732           | 0.4688        | 565 ± 54   | 534 ± 75   | 517 ± 65   | 409 ± 95   |
| 203660_s_at | PCNT2     | pericentrin 2                                               | <b>-0.0063</b>   | 0.1465            | <b>-0.0208</b>   | -0.4415           | 0.2669        | 1071 ± 43  | 995 ± 130  | 880 ± 55   | 890 ± 75   |

| Probe set   | Name    | Description                                      | NFT <sub>0</sub> | MMSE <sub>0</sub> | NFT <sub>1</sub> | MMSE <sub>1</sub> | ANOVA         | Control     | Incipient   | Moderate   | Severe      |
|-------------|---------|--------------------------------------------------|------------------|-------------------|------------------|-------------------|---------------|-------------|-------------|------------|-------------|
| 205549_at   | PCP4    | Purkinje cell protein 4                          | -0.0731          | <b>0.0132</b>     | -0.3427          | <b>0.0067</b>     | <b>0.0098</b> | 2632 ± 442  | 1385 ± 316  | 2131 ± 138 | 1094 ± 196  |
| 205825_at   | PCSK1   | proprotein convertase subtilisin/kexin type 1    | -0.0760          | <b>0.0201</b>     | 0.3026           | 0.3018            | 0.1015        | 359 ± 117   | 225 ± 62    | 185 ± 45   | 70 ± 20     |
| 204870_s_at | PCSK2   | proprotein convertase subtilisin/kexin type 2    | <b>-0.0450</b>   | <b>0.0133</b>     | 0.2045           | -0.4055           | 0.0735        | 625 ± 85    | 600 ± 172   | 438 ± 72   | 265 ± 38    |
| 204869_at   | PCSK2   | proprotein convertase subtilisin/kexin type 2    | <b>-0.0332</b>   | <b>0.0098</b>     | 0.4376           | 0.0683            | 0.0737        | 1857 ± 373  | 1579 ± 349  | 1418 ± 240 | 714 ± 96    |
| 207239_s_at | PCK1    | PCTAIRE protein kinase 1                         | -0.1262          | <b>0.0343</b>     | -0.1361          | 0.1521            | 0.2667        | 547 ± 58    | 510 ± 70    | 507 ± 38   | 394 ± 17    |
| 221918_at   | PCK2    | PCTAIRE protein kinase 2                         | <b>-0.0434</b>   | 0.2272            | -0.3523          | 0.3467            | 0.5912        | 2675 ± 247  | 2497 ± 329  | 2336 ± 155 | 2201 ± 264  |
| 213581_at   | PDCD2   | programmed cell death 2                          | <b>-0.0162</b>   | <b>0.0467</b>     | -0.2544          | -0.2499           | 0.2017        | 407 ± 33    | 385 ± 25    | 339 ± 16   | 321 ± 43    |
| 219275_at   | PDCD5   | programmed cell death 5                          | <b>-0.0043</b>   | <b>0.0001</b>     | <b>-0.0098</b>   | 0.2160            | 0.1481        | 221 ± 13    | 199 ± 20    | 208 ± 18   | 156 ± 27    |
| 204134_at   | PDE2A   | phosphodiesterase 2A, cGMP-stimulated            | -0.1847          | <b>0.0032</b>     | 0.2138           | 0.2123            | <b>0.0489</b> | 2889 ± 141  | 3178 ± 355  | 2889 ± 331 | 2049 ± 212  |
| 203708_at   | PDE4B   | phosphodiesterase 4B, cAMP-specific              | <b>-0.0326</b>   | 0.3534            | -0.1073          | -0.4451           | 0.4626        | 1664 ± 158  | 1521 ± 211  | 1541 ± 204 | 1219 ± 233  |
| 204491_at   | PDE4D   | phosphodiesterase 4D, cAMP-specific              | -0.2492          | <b>0.0324</b>     | -0.4339          | -0.4607           | 0.1627        | 461 ± 36    | 439 ± 37    | 400 ± 17   | 358 ± 37    |
| 214130_s_at | PDE4DIP | phosphodiesterase 4D interacting protein         | <b>-0.0469</b>   | 0.6333            | -0.1268          | <b>-0.0530</b>    | 0.6667        | 73 ± 19     | 68 ± 19     | 65 ± 14    | 42 ± 17     |
| 200980_s_at | PDHA1   | pyruvate dehydrogenase alpha 1                   | <b>0.0000</b>    | <b>0.0012</b>     | 0.4392           | -0.3941           | <b>0.0016</b> | 1331 ± 26   | 1249 ± 64   | 1146 ± 59  | 1028 ± 43   |
| 208911_s_at | PDHB    | pyruvate dehydrogenase beta                      | <b>-0.0269</b>   | 0.5494            | -0.3129          | -0.3853           | 0.7384        | 343 ± 41    | 340 ± 52    | 281 ± 46   | 303 ± 46    |
| 211023_at   | PDHB    | pyruvate dehydrogenase beta                      | <b>-0.0050</b>   | <b>0.0044</b>     | 0.4320           | -0.2444           | <b>0.0021</b> | 3184 ± 249  | 3117 ± 327  | 2159 ± 209 | 1913 ± 242  |
| 203067_at   | PDX1    | Pyruvate dehydrog. complex, lipoyl-cont. comp. X | -0.1471          | <b>0.0135</b>     | -0.4208          | <b>0.0339</b>     | 0.1166        | 893 ± 86    | 775 ± 67    | 773 ± 53   | 630 ± 78    |
| 212094_at   | PEG10   | paternally expressed 10                          | <b>-0.0231</b>   | <b>0.0035</b>     | -0.2648          | 0.2707            | <b>0.0103</b> | 2795 ± 318  | 3278 ± 614  | 1807 ± 154 | 1498 ± 305  |
| 209242_at   | PEG3    | paternally expressed 3                           | -0.0608          | <b>0.0314</b>     | -0.2267          | -0.3472           | 0.1349        | 6585 ± 539  | 5817 ± 759  | 5968 ± 512 | 4532 ± 618  |
| 213791_at   | PENK    | proenkephalin                                    | <b>-0.0085</b>   | 0.3223            | -0.0637          | 0.1760            | 0.1527        | 288 ± 19    | 252 ± 28    | 183 ± 30   | 264 ± 55    |
| 215023_s_at | PEX1    | peroxisome biogenesis factor 1                   | <b>-0.0210</b>   | <b>0.0114</b>     | 0.4575           | -0.2887           | <b>0.0214</b> | 132 ± 17    | 142 ± 26    | 96 ± 24    | 43 ± 14     |
| 202658_at   | PEX11B  | peroxisomal biogenesis factor 11B                | <b>-0.0459</b>   | <b>0.0450</b>     | 0.0908           | 0.4108            | <b>0.0122</b> | 1041 ± 88   | 1127 ± 110  | 740 ± 73   | 799 ± 78    |
| 203972_s_at | PEX3    | peroxisomal biogenesis factor 3                  | <b>-0.0160</b>   | <b>0.0037</b>     | -0.4727          | -0.2367           | <b>0.0399</b> | 288 ± 24    | 314 ± 16    | 215 ± 20   | 245 ± 35    |
| 205420_at   | PEX7    | peroxisomal biogenesis factor 7                  | <b>-0.0283</b>   | 0.3050            | 0.2090           | -0.4465           | 0.1660        | 123 ± 14    | 174 ± 21    | 105 ± 17   | 112 ± 35    |
| 201507_at   | PFDN1   | prefoldin 1                                      | -0.1288          | <b>0.0469</b>     | 0.4326           | 0.4238            | 0.1706        | 795 ± 47    | 832 ± 63    | 792 ± 58   | 669 ± 24    |
| 218336_at   | PFDN2   | prefoldin 2                                      | -0.0804          | <b>0.0083</b>     | <b>-0.0340</b>   | 0.3985            | <b>0.0337</b> | 1546 ± 105  | 1423 ± 134  | 1446 ± 118 | 1053 ± 107  |
| 205361_s_at | PFDN4   | prefoldin 4                                      | <b>-0.0030</b>   | <b>0.0021</b>     | -0.2792          | 0.2061            | <b>0.0154</b> | 466 ± 53    | 452 ± 70    | 383 ± 42   | 221 ± 20    |
| 210976_s_at | PFKM    | phosphofructokinase, muscle                      | <b>-0.0063</b>   | <b>0.0173</b>     | -0.4324          | 0.3557            | <b>0.0159</b> | 3250 ± 260  | 2841 ± 286  | 2238 ± 289 | 2084 ± 244  |
| 204992_s_at | PFN2    | profilin 2                                       | <b>-0.0062</b>   | <b>0.0008</b>     | 0.4195           | 0.2011            | 0.0682        | 10014 ± 859 | 8675 ± 1185 | 7037 ± 748 | 6590 ± 1195 |
| 204604_at   | PFTK1   | PFTAIRE protein kinase 1                         | <b>-0.0082</b>   | <b>0.0079</b>     | 0.4874           | 0.0678            | <b>0.0263</b> | 2379 ± 154  | 2415 ± 218  | 2107 ± 182 | 1635 ± 192  |
| 200886_s_at | PGAM1   | phosphoglycerate mutase 1                        | <b>-0.0209</b>   | <b>0.0344</b>     | -0.3238          | 0.1918            | <b>0.0493</b> | 6674 ± 616  | 5443 ± 351  | 5129 ± 395 | 4757 ± 510  |
| 200738_s_at | PGK1    | phosphoglycerate kinase 1                        | <b>-0.0116</b>   | <b>0.0043</b>     | -0.3625          | 0.1837            | 0.0812        | 3233 ± 352  | 2505 ± 356  | 2002 ± 222 | 2079 ± 536  |
| 201968_s_at | PGM1    | phosphoglucomutase 1                             | <b>-0.0012</b>   | 0.0599            | -0.1703          | 0.4710            | 0.2213        | 1613 ± 64   | 1554 ± 102  | 1436 ± 151 | 1305 ± 103  |
| 201121_s_at | PGRMC1  | progesterone receptor membrane component 1       | <b>-0.0344</b>   | 0.2342            | -0.3081          | 0.2832            | 0.6955        | 3884 ± 251  | 3788 ± 569  | 3419 ± 222 | 3362 ± 464  |
| 219394_at   | PGS1    | phosphatidylglycerophosphate synthase            | <b>-0.0119</b>   | 0.0730            | <b>-0.0015</b>   | <b>0.0068</b>     | 0.1517        | 380 ± 20    | 315 ± 21    | 302 ± 39   | 259 ± 55    |
| 222125_s_at | PH-4    | putative proline 4-hydroxylase                   | <b>-0.0156</b>   | <b>0.0312</b>     | -0.1491          | -0.4629           | <b>0.0173</b> | 2289 ± 154  | 2043 ± 127  | 1689 ± 70  | 1770 ± 168  |
| 210191_s_at | PHTF1   | putative homeodomain transcription factor 1      | <b>-0.0012</b>   | 0.0927            | -0.0597          | 0.3532            | 0.4203        | 321 ± 13    | 300 ± 25    | 274 ± 23   | 272 ± 34    |
| 217862_at   | PIAS1   | protein inhibitor of activated STAT, 1           | <b>-0.0438</b>   | 0.9802            | 0.3200           | -0.2490           | 0.2407        | 645 ± 37    | 644 ± 39    | 535 ± 40   | 662 ± 75    |
| 214152_at   | PIGB    | phosphatidylinositol glycan, class B             | <b>-0.0091</b>   | <b>0.0388</b>     | -0.4914          | 0.1408            | <b>0.0261</b> | 818 ± 64    | 713 ± 54    | 795 ± 85   | 527 ± 22    |
| 209707_at   | PIGK    | phosphatidylinositol glycan, class K             | <b>-0.0265</b>   | 0.4780            | -0.2272          | -0.4830           | 0.6416        | 483 ± 30    | 502 ± 70    | 422 ± 64   | 428 ± 40    |



| Probe set   | Name     | Description                                                 | NFT <sub>0</sub> | MMSE <sub>0</sub> | NFT <sub>1</sub> | MMSE <sub>1</sub> | ANOVA         | Control     | Incipient   | Moderate    | Severe      |
|-------------|----------|-------------------------------------------------------------|------------------|-------------------|------------------|-------------------|---------------|-------------|-------------|-------------|-------------|
| 212740_at   | PIK3R4   | phosphoinositide-3-kinase, regulatory subunit 4, p150       | <b>-0.0226</b>   | <b>0.0073</b>     | -0.4351          | 0.2147            | 0.2305        | 579 ± 38    | 577 ± 28    | 526 ± 41    | 475 ± 46    |
| 207081_s_at | PIK4CA   | phosphatidylinositol 4-kinase, catalytic, alpha polypeptide | <b>-0.0149</b>   | <b>0.0411</b>     | -0.1314          | -0.2358           | <b>0.0169</b> | 1741 ± 224  | 1294 ± 76   | 1108 ± 121  | 1053 ± 119  |
| 200703_at   | PIN      | dynein, cytoplasmic, light polypeptide 1                    | <b>-0.0047</b>   | <b>0.0048</b>     | -0.3047          | 0.2102            | 0.1285        | 10172 ± 672 | 9066 ± 1571 | 8219 ± 1035 | 6224 ± 1413 |
| 209018_s_at | PINK1    | PTEN induced putative kinase 1                              | -0.0835          | <b>0.0070</b>     | -0.4977          | 0.1649            | 0.1454        | 1321 ± 101  | 1254 ± 65   | 1192 ± 52   | 1067 ± 66   |
| 205632_s_at | PIP5K1B  | phosphatidylinositol-4-phosphate 5-kinase, type I, beta     | <b>-0.0484</b>   | <b>0.0185</b>     | -0.4943          | <b>0.0280</b>     | <b>0.0040</b> | 795 ± 62    | 784 ± 94    | 499 ± 25    | 566 ± 38    |
| 212518_at   | PIP5K1C  | phosphatidylinositol-4-phosphate 5-kinase, type I, gamma    | <b>-0.0351</b>   | <b>0.0209</b>     | -0.3586          | 0.2206            | 0.1774        | 2340 ± 126  | 2152 ± 147  | 2124 ± 169  | 1847 ± 173  |
| 201192_s_at | PITPN    | phosphotidylinositol transfer protein                       | <b>-0.0448</b>   | 0.1686            | 0.2374           | 0.0707            | 0.2133        | 457 ± 48    | 414 ± 19    | 343 ± 12    | 390 ± 57    |
| 201191_at   | PITPN    | phosphotidylinositol transfer protein                       | <b>-0.0255</b>   | <b>0.0044</b>     | 0.4938           | 0.4076            | 0.1057        | 499 ± 53    | 419 ± 68    | 419 ± 38    | 289 ± 74    |
| 202522_at   | PITPNB   | phosphotidylinositol transfer protein, beta                 | <b>-0.0081</b>   | <b>0.0383</b>     | -0.3010          | 0.2193            | <b>0.0115</b> | 2399 ± 134  | 2343 ± 122  | 1950 ± 105  | 1958 ± 33   |
| 218667_at   | PJA1     | praja 1                                                     | <b>-0.0004</b>   | <b>0.0001</b>     | -0.1957          | 0.2023            | 0.0772        | 1719 ± 111  | 1664 ± 117  | 1259 ± 98   | 1443 ± 210  |
| 222171_s_at | PKNOX2   | PBX/knotted 1 homeobox 2                                    | -0.0738          | <b>0.0180</b>     | -0.2567          | 0.4167            | <b>0.0097</b> | 246 ± 17    | 219 ± 32    | 253 ± 26    | 129 ± 19    |
| 219046_s_at | PKNOX2   | PBX/knotted 1 homeobox 2                                    | -0.0740          | <b>0.0203</b>     | -0.3309          | -0.4078           | <b>0.0159</b> | 398 ± 18    | 436 ± 41    | 299 ± 23    | 346 ± 29    |
| 213222_at   | PLCB1    | phospholipase C, beta 1                                     | <b>-0.0091</b>   | <b>0.0147</b>     | -0.4156          | 0.2477            | <b>0.0011</b> | 5460 ± 376  | 4232 ± 431  | 3604 ± 419  | 2688 ± 564  |
| 213309_at   | PLCL2    | phospholipase C-like 2                                      | <b>-0.0238</b>   | <b>0.0199</b>     | -0.0635          | 0.1993            | <b>0.0540</b> | 412 ± 55    | 327 ± 76    | 232 ± 39    | 213 ± 49    |
| 212891_s_at | PLINP-1  | papillomavirus L2 interacting nuclear protein 1             | <b>-0.0472</b>   | <b>0.0036</b>     | -0.2520          | 0.1091            | 0.0831        | 249 ± 28    | 192 ± 39    | 179 ± 26    | 138 ± 24    |
| 214781_at   | PLXNA1   | plexin A1                                                   | <b>-0.0217</b>   | <b>0.0420</b>     | -0.1991          | 0.3972            | <b>0.0064</b> | 396 ± 34    | 281 ± 28    | 306 ± 27    | 228 ± 34    |
| 201682_at   | PMPCB    | peptidase beta                                              | <b>-0.0375</b>   | 0.5359            | -0.0911          | -0.3878           | 0.5202        | 1241 ± 63   | 1205 ± 125  | 1055 ± 84   | 1130 ± 110  |
| 209598_at   | PNMA2    | paraneoplastic antigen MA2                                  | <b>-0.0029</b>   | <b>0.0101</b>     | 0.3527           | -0.2843           | 0.2358        | 5459 ± 569  | 4556 ± 780  | 4025 ± 669  | 3556 ± 747  |
| 212036_s_at | PNN      | pinin, desmosome associated protein                         | -0.3193          | <b>0.0376</b>     | -0.3043          | 0.2412            | 0.1625        | 600 ± 32    | 564 ± 25    | 580 ± 39    | 488 ± 44    |
| 212296_at   | POH1     | 26S proteasome-associated pad1 homolog                      | <b>-0.0428</b>   | <b>0.0314</b>     | -0.2466          | -0.4642           | 0.0667        | 2288 ± 146  | 2228 ± 157  | 1924 ± 125  | 1752 ± 190  |
| 201803_at   | POLR2B   | polymerase II polypeptide B, 140kDa                         | <b>-0.0146</b>   | <b>0.0129</b>     | -0.4616          | -0.0801           | 0.1129        | 1187 ± 85   | 1058 ± 131  | 945 ± 48    | 887 ± 97    |
| 202306_at   | POLR2G   | polymerase II polypeptide G                                 | <b>-0.0254</b>   | 0.0847            | -0.2151          | 0.0849            | <b>0.0410</b> | 1643 ± 137  | 1460 ± 111  | 1187 ± 44   | 1378 ± 84   |
| 216242_x_at | POLR2J2  | DNA directed RNA polymerase II polypeptide J-related gene   | <b>-0.0261</b>   | <b>0.0024</b>     | 0.0954           | -0.3703           | <b>0.0083</b> | 685 ± 82    | 869 ± 123   | 579 ± 24    | 439 ± 47    |
| 202634_at   | POLR2K   | polymerase II polypeptide K, 7.0kDa                         | <b>-0.0026</b>   | <b>0.0004</b>     | -0.1484          | -0.4865           | <b>0.0185</b> | 850 ± 66    | 837 ± 57    | 789 ± 35    | 590 ± 69    |
| 210830_s_at | PON2     | paraoxonase 2                                               | <b>-0.0143</b>   | 0.0971            | -0.2201          | -0.4042           | 0.2561        | 1418 ± 179  | 1234 ± 278  | 1158 ± 153  | 843 ± 179   |
| 217848_s_at | PP       | pyrophosphatase                                             | <b>-0.0039</b>   | 0.0898            | <b>-0.0177</b>   | 0.2296            | 0.1549        | 4022 ± 416  | 3457 ± 163  | 2915 ± 234  | 3072 ± 483  |
| 211765_x_at | PPIA     | peptidylprolyl isomerase A                                  | <b>-0.0099</b>   | <b>0.0111</b>     | -0.1443          | 0.4468            | <b>0.0019</b> | 12957 ± 664 | 1961 ± 1290 | 10820 ± 656 | 7802 ± 521  |
| 201293_x_at | PPIA     | peptidylprolyl isomerase A                                  | <b>-0.0031</b>   | <b>0.0032</b>     | -0.0556          | 0.1031            | 0.0596        | 13811 ± 850 | 2487 ± 1497 | 1851 ± 732  | 9640 ± 1095 |
| 204186_s_at | PPID     | peptidylprolyl isomerase D                                  | <b>-0.0162</b>   | <b>0.0393</b>     | 0.2221           | 0.0565            | <b>0.0046</b> | 331 ± 26    | 269 ± 33    | 218 ± 7     | 206 ± 23    |
| 201500_s_at | PPP1R11  | protein phosphatase 1, regulatory subunit 11                | <b>-0.0014</b>   | <b>0.0037</b>     | -0.4545          | 0.4563            | 0.2642        | 2295 ± 90   | 2259 ± 46   | 2200 ± 76   | 2059 ± 109  |
| 201604_s_at | PPP1R12A | protein phosphatase 1, regulatory subunit 12A               | <b>-0.0386</b>   | <b>0.0340</b>     | 0.3262           | 0.4527            | <b>0.0050</b> | 327 ± 24    | 276 ± 47    | 267 ± 28    | 137 ± 28    |
| 201603_at   | PPP1R12A | protein phosphatase 1, regulatory subunit 12A               | <b>-0.0152</b>   | <b>0.0003</b>     | 0.2750           | 0.1201            | 0.1917        | 626 ± 80    | 592 ± 71    | 511 ± 33    | 437 ± 38    |
| 202166_s_at | PPP1R2   | protein phosphatase 1, regulatory subunit 2                 | <b>-0.0145</b>   | 0.0976            | -0.3351          | -0.2773           | 0.1276        | 472 ± 47    | 455 ± 63    | 332 ± 30    | 362 ± 41    |
| 202165_at   | PPP1R2   | protein phosphatase 1, regulatory subunit 2                 | <b>-0.0052</b>   | <b>0.0001</b>     | -0.2934          | <b>0.0502</b>     | <b>0.0155</b> | 444 ± 69    | 438 ± 54    | 333 ± 19    | 205 ± 24    |
| 213465_s_at | PPP1R7   | protein phosphatase 1, regulatory subunit 7                 | -0.1161          | <b>0.0246</b>     | 0.2748           | -0.4794           | 0.1228        | 782 ± 63    | 795 ± 100   | 677 ± 60    | 572 ± 50    |
| 208652_at   | PPP2CA   | protein phosphatase 2, catalytic subunit, alpha isoform     | <b>-0.0338</b>   | <b>0.0017</b>     | 0.3552           | 0.3446            | <b>0.0028</b> | 3155 ± 299  | 2770 ± 112  | 2256 ± 130  | 1841 ± 279  |
| 213849_s_at | PPP2R2B  | protein phosphatase 2, regulatory subunit B, beta isoform   | <b>-0.0271</b>   | <b>0.0457</b>     | -0.4563          | 0.3413            | <b>0.0079</b> | 2047 ± 202  | 1733 ± 163  | 1729 ± 118  | 1173 ± 40   |
| 201877_s_at | PPP2R5C  | protein phosphatase 2, regulatory subunit B, gamma isoform  | <b>-0.0039</b>   | <b>0.0069</b>     | -0.2833          | 0.4574            | 0.2200        | 1900 ± 182  | 1677 ± 196  | 1504 ± 103  | 1420 ± 204  |
| 203338_at   | PPP2R5E  | protein phosphatase 2, regulatory B epsilon                 | <b>-0.0006</b>   | <b>0.0001</b>     | -0.0580          | <b>0.0480</b>     | 0.1080        | 707 ± 26    | 717 ± 22    | 655 ± 27    | 576 ± 73    |

| Probe set   | Name    | Description                                               | NFT <sub>0</sub> | MMSE <sub>0</sub> | NFT <sub>1</sub> | MMSE <sub>1</sub> | ANOVA         | Control     | Incipient   | Moderate   | Severe      |
|-------------|---------|-----------------------------------------------------------|------------------|-------------------|------------------|-------------------|---------------|-------------|-------------|------------|-------------|
| 202457_s_at | PPP3CA  | protein phosphatase 3 , catalytic subunit, alpha isoform  | <b>-0.0080</b>   | <b>0.0031</b>     | -0.4595          | 0.1890            | <b>0.0048</b> | 8074 ± 589  | 6655 ± 800  | 5487 ± 477 | 4384 ± 825  |
| 202429_s_at | PPP3CA  | protein phosphatase 3 , catalytic subunit, alpha isoform  | <b>-0.0086</b>   | <b>0.0017</b>     | 0.4935           | <b>0.0485</b>     | <b>0.0199</b> | 7798 ± 1142 | 5194 ± 1355 | 3797 ± 412 | 3682 ± 1035 |
| 202432_at   | PPP3CB  | protein phosphatase 3 , catalytic subunit, beta isoform   | -0.0576          | <b>0.0170</b>     | -0.4889          | 0.4507            | 0.1383        | 4986 ± 606  | 4343 ± 765  | 3769 ± 498 | 2951 ± 582  |
| 204507_s_at | PPP3R1  | protein phosphatase 3 , regulatory B alpha                | <b>-0.0057</b>   | <b>0.0049</b>     | -0.2169          | 0.1539            | <b>0.0136</b> | 405 ± 62    | 300 ± 50    | 227 ± 13   | 191 ± 39    |
| 204506_at   | PPP3R1  | protein phosphatase 3 , regulatory B alpha                | <b>-0.0070</b>   | <b>0.0049</b>     | -0.4510          | -0.3620           | <b>0.0015</b> | 1234 ± 109  | 837 ± 95    | 799 ± 55   | 765 ± 55    |
| 200975_at   | PPT1    | palmitoyl-protein thioesterase 1                          | <b>-0.0440</b>   | <b>0.0009</b>     | 0.2981           | <b>0.0304</b>     | <b>0.0099</b> | 3582 ± 178  | 3607 ± 118  | 3458 ± 197 | 2708 ± 232  |
| 205839_s_at | PRAX-1  | peripheral benzodiazepine receptor-associated protein 1   | <b>-0.0031</b>   | <b>0.0108</b>     | -0.2184          | 0.4381            | <b>0.0006</b> | 844 ± 41    | 664 ± 54    | 584 ± 28   | 595 ± 51    |
| 39729_at    | PRDX2   | peroxiredoxin 2                                           | -0.0596          | <b>0.0292</b>     | 0.4614           | 0.2679            | 0.2009        | 3131 ± 291  | 2805 ± 242  | 2711 ± 227 | 2333 ± 241  |
| 201619_at   | PRDX3   | peroxiredoxin 3                                           | <b>-0.0177</b>   | <b>0.0517</b>     | -0.2494          | -0.4916           | 0.2653        | 1362 ± 178  | 1294 ± 186  | 1051 ± 125 | 927 ± 196   |
| 201923_at   | PRDX4   | peroxiredoxin 4                                           | <b>-0.0476</b>   | 0.5869            | -0.2450          | -0.2642           | 0.5751        | 540 ± 48    | 557 ± 58    | 458 ± 49   | 503 ± 61    |
| 202918_s_at | PREI3   | preimplantation protein 3                                 | <b>-0.0317</b>   | <b>0.0096</b>     | -0.4853          | 0.3906            | <b>0.0266</b> | 544 ± 45    | 456 ± 51    | 424 ± 15   | 356 ± 37    |
| 37950_at    | PREP    | prolyl endopeptidase                                      | <b>-0.0217</b>   | 0.2065            | 0.3111           | -0.2782           | 0.2606        | 137 ± 11    | 143 ± 11    | 130 ± 9    | 111 ± 14    |
| 200603_at   | PRKAR1A | protein kinase, cAMP-dependent, regulatory, type I, alpha | <b>-0.0159</b>   | 0.1531            | -0.1772          | -0.4546           | 0.3804        | 4001 ± 272  | 3682 ± 469  | 3765 ± 326 | 3105 ± 417  |
| 200605_s_at | PRKAR1A | protein kinase, cAMP-dependent, regulatory, type I, alpha | <b>-0.0412</b>   | <b>0.0066</b>     | -0.3807          | 0.3783            | 0.0619        | 2457 ± 401  | 2172 ± 408  | 1710 ± 255 | 1113 ± 134  |
| 212559_at   | PRKAR1B | protein kinase, cAMP-dependent, regulatory, type I, beta  | <b>-0.0013</b>   | <b>0.0006</b>     | -0.3936          | 0.2274            | <b>0.0372</b> | 1397 ± 165  | 1280 ± 222  | 910 ± 122  | 778 ± 113   |
| 203680_at   | PRKAR2B | protein kinase, cAMP-dependent, regulatory, type II, beta | <b>-0.0086</b>   | <b>0.0013</b>     | 0.3263           | 0.2240            | <b>0.0030</b> | 1838 ± 216  | 1414 ± 188  | 1137 ± 59  | 873 ± 145   |
| 207957_s_at | PRKCB1  | protein kinase C, beta 1                                  | <b>-0.0164</b>   | <b>0.0020</b>     | 0.3583           | 0.0780            | <b>0.0057</b> | 2455 ± 495  | 1584 ± 186  | 1158 ± 160 | 773 ± 138   |
| 209685_s_at | PRKCB1  | protein kinase C, beta 1                                  | <b>-0.0329</b>   | <b>0.0238</b>     | 0.1049           | -0.0685           | <b>0.0382</b> | 5398 ± 393  | 4710 ± 227  | 4601 ± 476 | 3284 ± 683  |
| 209678_s_at | PRKCI   | protein kinase C, iota                                    | <b>-0.0092</b>   | <b>0.0119</b>     | -0.4112          | 0.0685            | <b>0.0150</b> | 1222 ± 122  | 1455 ± 156  | 1036 ± 72  | 900 ± 26    |
| 203376_at   | PRP17   | pre-mRNA splicing factor 17                               | <b>-0.0032</b>   | <b>0.0198</b>     | 0.3166           | -0.2424           | <b>0.0114</b> | 1291 ± 84   | 1174 ± 92   | 914 ± 73   | 1034 ± 68   |
| 209440_at   | PRPS1   | phosphoribosyl pyrophosphate synthetase 1                 | <b>-0.0164</b>   | <b>0.0146</b>     | -0.4113          | <b>0.0533</b>     | <b>0.0369</b> | 1058 ± 64   | 1066 ± 113  | 833 ± 62   | 826 ± 50    |
| 203089_s_at | PRSS25  | protease, serine, 25                                      | <b>-0.0097</b>   | <b>0.0028</b>     | 0.3243           | 0.3347            | 0.0702        | 470 ± 47    | 403 ± 29    | 344 ± 22   | 318 ± 59    |
| 220892_s_at | PSA     | phosphoserine aminotransferase                            | <b>-0.0491</b>   | 0.0753            | -0.1058          | -0.3851           | 0.2611        | 841 ± 138   | 796 ± 164   | 673 ± 145  | 444 ± 84    |
| 211746_x_at | PSMA1   | proteasome subunit, alpha type, 1                         | <b>-0.0220</b>   | 0.0867            | 0.4527           | 0.1546            | 0.2335        | 2250 ± 231  | 2026 ± 189  | 1667 ± 156 | 1734 ± 311  |
| 201676_x_at | PSMA1   | proteasome subunit, alpha type, 1                         | <b>-0.0012</b>   | <b>0.0311</b>     | 0.4155           | 0.4945            | <b>0.0166</b> | 1522 ± 193  | 1403 ± 166  | 1027 ± 83  | 856 ± 95    |
| 210759_s_at | PSMA1   | proteasome subunit, alpha type, 1                         | <b>-0.0135</b>   | <b>0.0318</b>     | -0.1441          | 0.1051            | <b>0.0453</b> | 1422 ± 104  | 1402 ± 135  | 983 ± 83   | 1037 ± 209  |
| 201274_at   | PSMA5   | proteasome subunit, alpha type, 5                         | <b>-0.0010</b>   | <b>0.0070</b>     | -0.0947          | 0.4506            | 0.0734        | 654 ± 50    | 536 ± 69    | 470 ± 29   | 482 ± 69    |
| 216088_s_at | PSMA7   | proteasome subunit, alpha type, 7                         | <b>-0.0364</b>   | 0.3534            | -0.4082          | -0.4917           | 0.3533        | 328 ± 26    | 269 ± 31    | 268 ± 26   | 263 ± 39    |
| 200039_s_at | PSMB2   | proteasome subunit, beta type, 2                          | <b>-0.0061</b>   | <b>0.0082</b>     | -0.3801          | -0.3101           | <b>0.0264</b> | 1705 ± 102  | 1643 ± 163  | 1393 ± 92  | 1210 ± 127  |
| 201400_at   | PSMB3   | proteasome subunit, beta type, 3                          | <b>-0.0338</b>   | <b>0.0077</b>     | -0.4886          | 0.3569            | <b>0.0157</b> | 1653 ± 67   | 1735 ± 213  | 1418 ± 50  | 1133 ± 107  |
| 202243_s_at | PSMB4   | proteasome subunit, beta type, 4                          | <b>-0.0233</b>   | 0.0990            | -0.2697          | 0.1900            | 0.2296        | 1272 ± 123  | 1040 ± 129  | 959 ± 97   | 937 ± 168   |
| 202244_at   | PSMB4   | proteasome subunit, beta type, 4                          | <b>-0.0235</b>   | 0.0762            | -0.1313          | 0.1674            | 0.2781        | 2345 ± 170  | 2055 ± 204  | 1982 ± 150 | 1896 ± 171  |
| 208799_at   | PSMB5   | proteasome subunit, beta type, 5                          | <b>-0.0208</b>   | 0.0767            | -0.2765          | 0.1780            | 0.2478        | 1790 ± 120  | 1741 ± 233  | 1375 ± 72  | 1451 ± 255  |
| 208827_at   | PSMB6   | proteasome subunit, beta type, 6                          | <b>-0.0144</b>   | 0.1035            | -0.3002          | -0.4680           | 0.2908        | 884 ± 55    | 876 ± 54    | 847 ± 50   | 742 ± 61    |
| 201068_s_at | PSMC2   | proteasome 26S subunit, ATPase, 2                         | <b>-0.0129</b>   | 0.1136            | <b>-0.0444</b>   | 0.1440            | 0.2789        | 1438 ± 71   | 1274 ± 133  | 1140 ± 94  | 1142 ± 183  |
| 201699_at   | PSMC6   | proteasome 26S subunit, ATPase, 6                         | <b>-0.0152</b>   | <b>0.0113</b>     | -0.3002          | -0.4475           | <b>0.0520</b> | 568 ± 51    | 521 ± 76    | 432 ± 43   | 347 ± 45    |
| 201198_s_at | PSMD1   | proteasome 26S subunit, non-ATPase, 1                     | <b>-0.0011</b>   | <b>0.0029</b>     | -0.3606          | 0.3787            | 0.1306        | 1027 ± 50   | 1004 ± 89   | 929 ± 45   | 790 ± 102   |
| 219485_s_at | PSMD10  | proteasome 26S subunit, non-ATPase, 10                    | <b>-0.0011</b>   | <b>0.0283</b>     | -0.3907          | 0.4622            | <b>0.0140</b> | 1407 ± 136  | 1358 ± 121  | 1079 ± 55  | 894 ± 88    |
| 208776_at   | PSMD11  | proteasome 26S subunit, non-ATPase, 11                    | <b>-0.0151</b>   | 0.2360            | 0.4594           | -0.4007           | 0.1905        | 609 ± 92    | 492 ± 92    | 359 ± 55   | 447 ± 89    |

| Probe set   | Name    | Description                                                  | NFT <sub>0</sub> | MMSE <sub>0</sub> | NFT <sub>1</sub> | MMSE <sub>1</sub> | ANOVA         | Control    | Incipient  | Moderate   | Severe     |
|-------------|---------|--------------------------------------------------------------|------------------|-------------------|------------------|-------------------|---------------|------------|------------|------------|------------|
| 202353_s_at | PSMD12  | proteasome 26S subunit, non-ATPase, 12                       | <b>-0.0073</b>   | <b>0.0113</b>     | -0.3918          | -0.1008           | 0.1301        | 1128 ± 91  | 1048 ± 100 | 890 ± 58   | 850 ± 119  |
| 209853_s_at | PSME3   | proteasome activator subunit 3                               | -0.0553          | <b>0.0017</b>     | 0.2877           | 0.1113            | <b>0.0124</b> | 297 ± 30   | 275 ± 37   | 234 ± 24   | 129 ± 49   |
| 209852_x_at | PSME3   | proteasome activator subunit 3                               | <b>-0.0081</b>   | <b>0.0354</b>     | -0.0945          | 0.1344            | <b>0.0214</b> | 1029 ± 35  | 1063 ± 71  | 982 ± 28   | 851 ± 45   |
| 218371_s_at | PSP1    | paraspeckle protein 1                                        | <b>-0.0227</b>   | 0.2295            | -0.1960          | -0.3731           | 0.3266        | 549 ± 28   | 514 ± 43   | 473 ± 34   | 483 ± 24   |
| 218477_at   | PTD011  | PTD011 protein                                               | <b>-0.0284</b>   | 0.0700            | -0.2274          | -0.4150           | 0.1845        | 1798 ± 249 | 1474 ± 278 | 1369 ± 195 | 1097 ± 124 |
| 201433_s_at | PTDSS1  | phosphatidylserine synthase 1                                | <b>-0.0302</b>   | 0.1749            | -0.3827          | -0.4934           | 0.4870        | 1860 ± 40  | 1859 ± 149 | 1665 ± 77  | 1721 ± 151 |
| 211711_s_at | PTEN    | phosphatase and tensin homolog                               | <b>-0.0122</b>   | <b>0.0023</b>     | -0.4138          | 0.0631            | <b>0.0260</b> | 190 ± 8    | 162 ± 9    | 150 ± 11   | 143 ± 14   |
| 204897_at   | PTGER4  | prostaglandin E receptor 4                                   | <b>-0.0468</b>   | 0.4669            | -0.2958          | -0.4613           | 0.3667        | 127 ± 10   | 104 ± 19   | 83 ± 16    | 97 ± 26    |
| 218083_at   | PTGES2  | prostaglandin E synthase 2                                   | <b>-0.0253</b>   | <b>0.0204</b>     | 0.4371           | 0.4251            | <b>0.0389</b> | 340 ± 39   | 335 ± 25   | 258 ± 33   | 195 ± 50   |
| 206772_at   | PTHHR2  | parathyroid hormone receptor 2                               | <b>-0.0455</b>   | -0.7974           | -0.2897          | 0.2555            | 0.5778        | 223 ± 24   | 173 ± 30   | 195 ± 17   | 215 ± 37   |
| 203110_at   | PTK2B   | protein tyrosine kinase 2 beta                               | <b>-0.0123</b>   | <b>0.0018</b>     | 0.4156           | 0.1991            | 0.2382        | 1756 ± 172 | 1795 ± 196 | 1617 ± 131 | 1321 ± 180 |
| 211737_x_at | PTN     | pleiotrophin                                                 | -0.1183          | <b>0.0101</b>     | 0.1067           | -0.4360           | <b>0.0046</b> | 2175 ± 112 | 2594 ± 239 | 2397 ± 161 | 1574 ± 212 |
| 209466_x_at | PTN     | pleiotrophin                                                 | <b>-0.0116</b>   | <b>0.0092</b>     | 0.2051           | 0.4984            | <b>0.0347</b> | 1811 ± 127 | 1879 ± 143 | 1467 ± 182 | 1329 ± 98  |
| 221840_at   | PTPRE   | protein tyrosine phosphatase, receptor type, E               | <b>-0.0421</b>   | 0.0803            | -0.4168          | 0.4167            | 0.1692        | 1402 ± 155 | 1219 ± 85  | 1045 ± 48  | 1086 ± 144 |
| 203029_s_at | PTPRN2  | protein tyrosine phosphatase, receptor type, N polypeptide 2 | <b>-0.0017</b>   | <b>0.0159</b>     | 0.3653           | -0.4912           | 0.1272        | 2407 ± 350 | 2392 ± 270 | 1937 ± 215 | 1481 ± 318 |
| 210675_s_at | PTPRR   | protein tyrosine phosphatase, receptor type, R               | -0.5414          | <b>0.0276</b>     | <b>-0.0436</b>   | 0.0865            | 0.0904        | 325 ± 22   | 242 ± 31   | 262 ± 36   | 205 ± 38   |
| 206084_at   | PTPRR   | protein tyrosine phosphatase, receptor type, R               | -0.6541          | <b>0.0328</b>     | 0.2960           | 0.2296            | 0.3611        | 232 ± 25   | 236 ± 46   | 220 ± 27   | 161 ± 10   |
| 205948_at   | PTPRT   | protein tyrosine phosphatase, receptor type, T               | -0.1792          | <b>0.0374</b>     | -0.2485          | -0.1760           | 0.0830        | 472 ± 37   | 575 ± 149  | 370 ± 48   | 250 ± 76   |
| 209694_at   | PTS     | 6-pyruvoyltetrahydropterin synthase                          | <b>-0.0377</b>   | 0.3707            | -0.2676          | 0.3147            | 0.3071        | 1000 ± 84  | 912 ± 105  | 767 ± 64   | 912 ± 106  |
| 206157_at   | PTX3    | pentaxin-related gene, rapidly induced by IL-1 beta          | -0.4309          | <b>0.0154</b>     | 0.0565           | 0.3271            | 0.1006        | 90 ± 12    | 90 ± 12    | 52 ± 10    | 61 ± 17    |
| 216221_s_at | PUM2    | pumilio homolog 2                                            | <b>-0.0019</b>   | 0.1107            | -0.1846          | 0.3783            | 0.3095        | 2907 ± 93  | 2774 ± 186 | 2738 ± 125 | 2508 ± 196 |
| 201706_s_at | PXF     | peroxisomal farnesylated protein                             | <b>-0.0344</b>   | 0.0633            | -0.4288          | -0.4344           | 0.2202        | 524 ± 44   | 530 ± 76   | 454 ± 42   | 355 ± 92   |
| 201568_at   | QP-C    | low molecular mass ubiquinone-binding protein                | <b>-0.0363</b>   | <b>0.0020</b>     | 0.3897           | 0.0943            | 0.0604        | 3863 ± 229 | 3684 ± 223 | 3173 ± 248 | 2838 ± 390 |
| 205174_s_at | QPCT    | glutaminy-peptide cyclotransferase                           | <b>-0.0249</b>   | <b>0.0036</b>     | 0.3491           | 0.4578            | <b>0.0085</b> | 217 ± 29   | 163 ± 22   | 117 ± 15   | 115 ± 19   |
| 202754_at   | R3HDM   | R3H domain containing                                        | -0.0918          | <b>0.0047</b>     | -0.2158          | -0.3046           | <b>0.0186</b> | 2101 ± 182 | 1776 ± 205 | 1855 ± 182 | 1246 ± 135 |
| 215548_s_at | RA410   | vesicle transport-related protein                            | <b>-0.0111</b>   | <b>0.0033</b>     | 0.2647           | -0.4215           | <b>0.0027</b> | 617 ± 46   | 622 ± 30   | 614 ± 28   | 427 ± 37   |
| 200863_s_at | RAB11A  | RAB11A, member RAS oncogene family                           | <b>-0.0118</b>   | <b>0.0546</b>     | -0.3706          | -0.1627           | 0.1194        | 2222 ± 119 | 2025 ± 236 | 1824 ± 135 | 1635 ± 221 |
| 208734_x_at | RAB2    | RAB2, member RAS oncogene family                             | -0.3161          | <b>0.0293</b>     | 0.0814           | 0.2726            | 0.1268        | 598 ± 64   | 645 ± 48   | 468 ± 17   | 521 ± 62   |
| 208732_at   | RAB2    | RAB2, member RAS oncogene family                             | <b>-0.0192</b>   | <b>0.0185</b>     | 0.4736           | 0.2287            | <b>0.0239</b> | 1327 ± 117 | 1367 ± 115 | 1157 ± 100 | 873 ± 80   |
| 208731_at   | RAB2    | RAB2, member RAS oncogene family                             | <b>-0.0145</b>   | <b>0.0010</b>     | -0.4806          | 0.3808            | 0.1065        | 3283 ± 379 | 2706 ± 326 | 2660 ± 252 | 2029 ± 397 |
| 204974_at   | RAB3A   | RAB3A, member RAS oncogene family                            | -0.1214          | <b>0.0215</b>     | 0.1592           | 0.2433            | 0.2369        | 2346 ± 403 | 2236 ± 215 | 1790 ± 263 | 1548 ± 217 |
| 210406_s_at | RAB6A   | RAB6A, member RAS oncogene family                            | <b>-0.0090</b>   | <b>0.0055</b>     | 0.4432           | 0.2787            | <b>0.0051</b> | 2944 ± 286 | 2568 ± 395 | 2005 ± 160 | 1470 ± 141 |
| 201047_x_at | RAB6A   | RAB6A, member RAS oncogene family                            | <b>-0.0090</b>   | <b>0.0281</b>     | -0.4386          | 0.2434            | 0.0552        | 3497 ± 310 | 3334 ± 381 | 2684 ± 230 | 2350 ± 353 |
| 211960_s_at | RAB7    | RAB7, member RAS oncogene family                             | <b>-0.0011</b>   | <b>0.0018</b>     | -0.1173          | <b>0.0339</b>     | <b>0.0294</b> | 628 ± 52   | 566 ± 47   | 433 ± 60   | 435 ± 44   |
| 203150_at   | RAB9P40 | Rab9 effector p40                                            | -0.1689          | <b>0.0439</b>     | <b>0.0169</b>    | 0.4948            | <b>0.0472</b> | 512 ± 48   | 657 ± 95   | 483 ± 21   | 425 ± 21   |
| 201223_s_at | RAD23B  | RAD23 homolog B                                              | <b>-0.0139</b>   | 0.0691            | -0.1518          | -0.4530           | 0.1062        | 972 ± 52   | 853 ± 117  | 736 ± 55   | 747 ± 73   |
| 209849_s_at | RAD51C  | RAD51 homolog C                                              | <b>-0.0121</b>   | <b>0.0382</b>     | 0.0662           | -0.4592           | <b>0.0009</b> | 481 ± 35   | 400 ± 15   | 289 ± 22   | 318 ± 48   |
| 206066_s_at | RAD51C  | RAD51 homolog C                                              | <b>-0.0113</b>   | <b>0.0382</b>     | -0.4333          | 0.3324            | 0.1583        | 186 ± 30   | 211 ± 8    | 144 ± 25   | 128 ± 28   |
| 201628_s_at | RAGA    | Ras-related GTP-binding protein                              | <b>-0.0065</b>   | <b>0.0124</b>     | -0.0669          | -0.3912           | 0.0814        | 2592 ± 327 | 2187 ± 360 | 1542 ± 196 | 1702 ± 352 |

| Probe set   | Name     | Description                                       | NFT <sub>0</sub> | MMSE <sub>0</sub> | NFT <sub>1</sub> | MMSE <sub>1</sub> | ANOVA         | Control    | Incipient  | Moderate   | Severe     |
|-------------|----------|---------------------------------------------------|------------------|-------------------|------------------|-------------------|---------------|------------|------------|------------|------------|
| 202100_at   | RALB     | v-rat simian leukemia viral oncogene homolog B    | -0.2560          | <b>0.0070</b>     | 0.1221           | -0.4137           | <b>0.0408</b> | 1048 ± 73  | 1144 ± 91  | 875 ± 60   | 857 ± 78   |
| 212166_at   | RANBP16  | RAN binding protein 16                            | <b>-0.0195</b>   | <b>0.0016</b>     | <b>-0.0119</b>   | 0.1367            | <b>0.0472</b> | 761 ± 75   | 752 ± 89   | 590 ± 57   | 457 ± 107  |
| 201713_s_at | RANBP2   | RAN binding protein 2                             | <b>-0.0019</b>   | <b>0.0007</b>     | <b>-0.0068</b>   | 0.1707            | <b>0.0027</b> | 939 ± 70   | 807 ± 36   | 833 ± 61   | 550 ± 65   |
| 200992_at   | RANBP7   | RAN binding protein 7                             | <b>-0.0221</b>   | <b>0.0277</b>     | -0.0931          | 0.4008            | <b>0.0034</b> | 1226 ± 50  | 1083 ± 44  | 1061 ± 54  | 922 ± 37   |
| 202583_s_at | RANBP9   | RAN binding protein 9                             | <b>-0.0213</b>   | <b>0.0406</b>     | -0.1058          | -0.4213           | 0.0888        | 590 ± 41   | 531 ± 42   | 504 ± 46   | 420 ± 48   |
| 202582_s_at | RANBP9   | RAN binding protein 9                             | <b>-0.0016</b>   | <b>0.0021</b>     | <b>-0.0057</b>   | 0.4574            | 0.0615        | 2742 ± 173 | 2489 ± 268 | 2730 ± 80  | 1967 ± 291 |
| 201174_s_at | RAP1     | TRF2-interacting telomeric RAP1 protein           | -0.1245          | <b>0.0243</b>     | -0.3511          | 0.1460            | 0.0926        | 4273 ± 411 | 3538 ± 262 | 3286 ± 315 | 3120 ± 311 |
| 209444_at   | RAP1GDS1 | RAP1, GTP-GDP dissociation stimulator 1           | <b>-0.0218</b>   | 0.2779            | -0.1054          | -0.3284           | 0.4242        | 1873 ± 104 | 1726 ± 188 | 1576 ± 78  | 1608 ± 177 |
| 219752_at   | RASAL1   | RAS protein activator like 1                      | <b>-0.0425</b>   | 0.0580            | 0.1507           | 0.1512            | 0.4003        | 754 ± 72   | 780 ± 94   | 662 ± 91   | 591 ± 45   |
| 202033_s_at | RB1CC1   | RB1-inducible coiled-coil 1                       | <b>-0.0075</b>   | <b>0.0143</b>     | -0.3792          | 0.4869            | <b>0.0026</b> | 1687 ± 137 | 1333 ± 149 | 1271 ± 136 | 903 ± 84   |
| 202034_x_at | RB1CC1   | RB1-inducible coiled-coil 1                       | <b>-0.0166</b>   | <b>0.0044</b>     | 0.0712           | -0.2828           | <b>0.0203</b> | 732 ± 69   | 605 ± 23   | 530 ± 32   | 523 ± 54   |
| 201092_at   | RBBP7    | retinoblastoma binding protein 7                  | <b>-0.0011</b>   | 0.5733            | 0.0803           | <b>-0.0502</b>    | 0.5745        | 1637 ± 59  | 1700 ± 153 | 1564 ± 72  | 1503 ± 118 |
| 213762_x_at | RBMX     | RNA binding motif protein, X chromosome           | <b>-0.0310</b>   | <b>0.0156</b>     | -0.1546          | -0.1673           | <b>0.0007</b> | 994 ± 74   | 1198 ± 83  | 816 ± 47   | 772 ± 13   |
| 218117_at   | RBX1     | ring-box 1                                        | <b>-0.0101</b>   | <b>0.0143</b>     | 0.4879           | -0.4419           | <b>0.0169</b> | 1113 ± 48  | 1088 ± 139 | 1073 ± 58  | 744 ± 50   |
| 212820_at   | RC3      | rabconnectin-3                                    | <b>-0.0025</b>   | <b>0.0239</b>     | 0.3852           | -0.4732           | 0.0887        | 1364 ± 169 | 1180 ± 148 | 1004 ± 130 | 809 ± 160  |
| 201485_s_at | RCN2     | reticulocalbin 2, EF-hand calcium binding domain  | <b>-0.0494</b>   | 0.1507            | -0.4626          | 0.2110            | 0.3914        | 847 ± 150  | 659 ± 144  | 550 ± 98   | 591 ± 139  |
| 212612_at   | RCOR     | REST corepressor                                  | <b>-0.0082</b>   | <b>0.0050</b>     | 0.3048           | -0.2285           | 0.0800        | 342 ± 20   | 326 ± 37   | 271 ± 24   | 254 ± 28   |
| 221532_s_at | REC14    | recombination protein REC14                       | <b>-0.0030</b>   | <b>0.0048</b>     | -0.4217          | 0.2010            | <b>0.0052</b> | 806 ± 72   | 987 ± 50   | 741 ± 84   | 519 ± 72   |
| 205091_x_at | RECQL    | RecQ protein-like                                 | <b>-0.0363</b>   | 0.2159            | -0.3520          | 0.2599            | 0.2323        | 108 ± 9    | 96 ± 14    | 105 ± 14   | 71 ± 16    |
| 219370_at   | REPRIMO  | candidate mediator of the p53-dependent G2 arrest | -0.5890          | <b>0.0171</b>     | -0.4041          | 0.3631            | 0.0584        | 610 ± 74   | 586 ± 100  | 612 ± 86   | 307 ± 85   |
| 203209_at   | RFC5     | replication factor C 5, 36.5kDa                   | -0.1559          | <b>0.0312</b>     | 0.0806           | 0.1896            | <b>0.0191</b> | 310 ± 22   | 283 ± 18   | 219 ± 11   | 243 ± 27   |
| 214120_at   | RFPL1S   | ret finger protein-like 1 antisense               | <b>-0.0056</b>   | <b>0.0484</b>     | -0.2988          | <b>0.0201</b>     | <b>0.0099</b> | 1810 ± 258 | 1262 ± 206 | 874 ± 71   | 925 ± 233  |
| 214408_s_at | RFPL3S   | ret finger protein-like 3 antisense               | <b>-0.0118</b>   | 0.4082            | -0.0807          | -0.1593           | 0.6198        | 157 ± 12   | 153 ± 18   | 131 ± 18   | 135 ± 21   |
| 202963_at   | RFX5     | regulatory factor X, 5                            | <b>-0.0280</b>   | 0.0640            | 0.4011           | <b>0.0520</b>     | 0.3412        | 320 ± 25   | 315 ± 31   | 291 ± 13   | 243 ± 53   |
| 38290_at    | RGS14    | regulator of G-protein signalling 14              | <b>-0.0259</b>   | <b>0.0456</b>     | -0.4349          | <b>0.0178</b>     | 0.0819        | 496 ± 50   | 410 ± 73   | 295 ± 29   | 362 ± 69   |
| 202388_at   | RGS2     | regulator of G-protein signalling 2, 24kDa        | <b>-0.0462</b>   | 0.3204            | -0.2343          | 0.0834            | <b>0.0360</b> | 1581 ± 225 | 886 ± 39   | 944 ± 75   | 1141 ± 242 |
| 210138_at   | RGS20    | regulator of G-protein signalling 20              | <b>-0.0360</b>   | <b>0.0074</b>     | -0.2926          | 0.4766            | 0.1560        | 700 ± 58   | 579 ± 48   | 604 ± 54   | 525 ± 54   |
| 204339_s_at | RGS4     | regulator of G-protein signalling 4               | -0.2501          | <b>0.0047</b>     | 0.4753           | <b>0.0108</b>     | 0.0627        | 710 ± 97   | 548 ± 40   | 577 ± 65   | 419 ± 40   |
| 204337_at   | RGS4     | regulator of G-protein signalling 4               | <b>-0.0070</b>   | <b>0.0002</b>     | -0.4824          | 0.0579            | <b>0.0481</b> | 3414 ± 635 | 2857 ± 869 | 2061 ± 340 | 1082 ± 207 |
| 206290_s_at | RGS7     | regulator of G-protein signalling 7               | <b>-0.0039</b>   | <b>0.0005</b>     | <b>-0.0362</b>   | 0.0617            | <b>0.0063</b> | 3660 ± 319 | 2949 ± 350 | 2458 ± 409 | 1779 ± 331 |
| 201453_x_at | RHEB2    | Ras homolog enriched in brain 2                   | <b>-0.0132</b>   | 0.3169            | -0.0716          | 0.3759            | <b>0.0493</b> | 3709 ± 199 | 3189 ± 261 | 2561 ± 170 | 3197 ± 447 |
| 206137_at   | RIMS2    | regulating synaptic membrane exocytosis 2         | <b>-0.0032</b>   | <b>0.0022</b>     | 0.3984           | -0.3914           | <b>0.0014</b> | 733 ± 45   | 580 ± 26   | 547 ± 79   | 341 ± 67   |
| 206984_s_at | RIT2     | Ras-like without CAAX 2                           | -0.1110          | <b>0.0333</b>     | -0.4794          | 0.3233            | 0.1997        | 346 ± 59   | 261 ± 45   | 279 ± 56   | 176 ± 43   |
| 217983_s_at | RNASE6PL | ribonuclease 6 precursor                          | <b>-0.0441</b>   | 0.3043            | 0.3740           | 0.4924            | <b>0.0074</b> | 1946 ± 172 | 2391 ± 165 | 1381 ± 90  | 1997 ± 250 |
| 208924_at   | RNF11    | ring finger protein 11                            | <b>-0.0106</b>   | <b>0.0378</b>     | -0.2098          | 0.2334            | <b>0.0087</b> | 3692 ± 286 | 3342 ± 291 | 3132 ± 201 | 2377 ± 201 |
| 201824_at   | RNF14    | ring finger protein 14                            | <b>-0.0227</b>   | <b>0.0067</b>     | 0.3640           | 0.3373            | 0.2201        | 650 ± 41   | 605 ± 66   | 595 ± 35   | 508 ± 29   |
| 218528_s_at | RNF38    | ring finger protein 38                            | -0.1884          | <b>0.0467</b>     | -0.2510          | -0.1167           | <b>0.0269</b> | 1236 ± 53  | 1323 ± 46  | 1007 ± 41  | 1061 ± 126 |
| 209111_at   | RNF5     | ring finger protein 5                             | -0.0580          | <b>0.0416</b>     | -0.4001          | 0.3892            | 0.0834        | 753 ± 51   | 790 ± 41   | 726 ± 32   | 533 ± 125  |
| 203403_s_at | RNF6     | ring finger protein 6                             | <b>-0.0250</b>   | <b>0.0035</b>     | 0.3032           | 0.2629            | <b>0.0500</b> | 1619 ± 155 | 1603 ± 67  | 1251 ± 110 | 1112 ± 196 |

| Probe set   | Name   | Description                                              | NFT <sub>0</sub> | MMSE <sub>0</sub> | NFT <sub>1</sub> | MMSE <sub>1</sub> | ANOVA         | Control     | Incipient   | Moderate    | Severe      |
|-------------|--------|----------------------------------------------------------|------------------|-------------------|------------------|-------------------|---------------|-------------|-------------|-------------|-------------|
| 202683_s_at | RNMT   | RNA methyltransferase                                    | <b>-0.0229</b>   | <b>0.0273</b>     | <b>-0.0276</b>   | 0.2454            | <b>0.0350</b> | 1008 ± 65   | 1073 ± 77   | 978 ± 45    | 804 ± 45    |
| 204426_at   | RNP24  | coated vesicle membrane protein                          | -0.0658          | <b>0.0373</b>     | -0.2685          | 0.0970            | 0.1209        | 170 ± 24    | 144 ± 26    | 165 ± 23    | 93 ± 21     |
| 213194_at   | ROBO1  | roundabout, axon guidance receptor, homolog 1            | <b>-0.0190</b>   | <b>0.0339</b>     | -0.4821          | <b>0.0486</b>     | 0.0965        | 984 ± 82    | 859 ± 86    | 870 ± 61    | 676 ± 103   |
| 202762_at   | ROCK2  | Rho-associated, coiled-coil containing protein kinase 2  | <b>-0.0228</b>   | <b>0.0031</b>     | -0.1453          | <b>0.0405</b>     | 0.2037        | 1227 ± 85   | 1081 ± 67   | 1081 ± 74   | 966 ± 109   |
| 221770_at   | RPE    | ribulose-5-phosphate-3-epimerase                         | <b>-0.0387</b>   | <b>0.0374</b>     | -0.4633          | 0.0552            | <b>0.0123</b> | 179 ± 24    | 155 ± 18    | 87 ± 15     | 99 ± 27     |
| 206196_s_at | RPIP8  | RaP2 interacting protein 8                               | <b>-0.0217</b>   | <b>0.0004</b>     | -0.2493          | <b>0.0482</b>     | 0.2763        | 5670 ± 362  | 5352 ± 569  | 4939 ± 628  | 4245 ± 543  |
| 200074_s_at | RPL14  | ribosomal protein L14                                    | <b>-0.0052</b>   | <b>0.0196</b>     | 0.3355           | 0.4248            | <b>0.0005</b> | 2098 ± 88   | 2117 ± 133  | 2057 ± 86   | 1450 ± 105  |
| 221476_s_at | RPL15  | ribosomal protein L15                                    | <b>-0.0292</b>   | 0.1512            | 0.4066           | 0.3810            | 0.4572        | 9984 ± 466  | 9872 ± 444  | 9211 ± 408  | 9104 ± 585  |
| 200963_x_at | RPL31  | ribosomal protein L31                                    | <b>-0.0067</b>   | <b>0.0345</b>     | -0.4742          | -0.2562           | <b>0.0520</b> | 13482 ± 533 | 13363 ± 650 | 1059 ± 1174 | 10731 ± 833 |
| 213687_s_at | RPL35A | ribosomal protein L35a                                   | -0.0619          | <b>0.0386</b>     | -0.2630          | 0.3339            | 0.2020        | 3892 ± 155  | 3654 ± 208  | 3485 ± 320  | 3167 ± 251  |
| 202029_x_at | RPL38  | ribosomal protein L38                                    | -0.1238          | <b>0.0136</b>     | <b>-0.0222</b>   | -0.4213           | <b>0.0234</b> | 12727 ± 476 | 12211 ± 521 | 12152 ± 629 | 10199 ± 636 |
| 213689_x_at | RPL5   | ribosomal protein L5                                     | <b>-0.0137</b>   | 0.1197            | <b>-0.0144</b>   | 0.2009            | 0.1555        | 2350 ± 106  | 2050 ± 227  | 1983 ± 71   | 1911 ± 169  |
| 216044_x_at | RPL5   | ribosomal protein L5                                     | <b>-0.0033</b>   | <b>0.0230</b>     | <b>-0.0440</b>   | -0.3552           | 0.0602        | 1544 ± 83   | 1545 ± 151  | 1264 ± 139  | 1145 ± 106  |
| 200034_s_at | RPL6   | ribosomal protein L6                                     | <b>-0.0061</b>   | <b>0.0021</b>     | -0.3376          | 0.2732            | <b>0.0290</b> | 5621 ± 278  | 4976 ± 478  | 5064 ± 363  | 3918 ± 311  |
| 208689_s_at | RPN2   | ribophorin II                                            | <b>-0.0299</b>   | 0.3807            | <b>-0.0149</b>   | 0.4547            | 0.5514        | 1178 ± 115  | 1022 ± 100  | 992 ± 91    | 995 ± 127   |
| 209482_at   | RPP20  | POP7 homolog                                             | <b>-0.0405</b>   | 0.1971            | -0.4286          | 0.3070            | <b>0.0432</b> | 621 ± 52    | 564 ± 48    | 436 ± 6     | 537 ± 47    |
| 203436_at   | RPP30  | ribonuclease P                                           | <b>-0.0199</b>   | 0.1517            | -0.0989          | 0.0653            | 0.4253        | 511 ± 33    | 503 ± 35    | 450 ± 38    | 448 ± 30    |
| 200834_s_at | RPS21  | ribosomal protein S21                                    | <b>-0.0218</b>   | 0.0785            | -0.0662          | 0.4424            | 0.1528        | 7013 ± 172  | 6143 ± 780  | 5753 ± 580  | 5211 ± 561  |
| 217753_s_at | RPS26  | ribosomal protein S26                                    | <b>-0.0237</b>   | 0.5177            | 0.3376           | -0.2461           | 0.2265        | 3324 ± 215  | 3747 ± 252  | 3794 ± 440  | 2763 ± 521  |
| 201975_at   | RSN    | restin                                                   | -0.1203          | <b>0.0322</b>     | 0.1531           | -0.0649           | <b>0.0286</b> | 1621 ± 129  | 1694 ± 183  | 1670 ± 122  | 1092 ± 159  |
| 201980_s_at | RSU1   | Ras suppressor protein 1                                 | -0.0709          | <b>0.0021</b>     | <b>-0.0167</b>   | 0.2310            | <b>0.0132</b> | 451 ± 29    | 417 ± 11    | 343 ± 29    | 345 ± 23    |
| 203485_at   | RTN1   | reticulum 1                                              | -0.2571          | <b>0.0474</b>     | 0.3866           | -0.2933           | 0.1433        | 8674 ± 664  | 8959 ± 762  | 9070 ± 804  | 6869 ± 531  |
| 210222_s_at | RTN1   | reticulum 1                                              | <b>-0.0274</b>   | <b>0.0350</b>     | -0.3646          | -0.3413           | <b>0.0198</b> | 4900 ± 755  | 4110 ± 829  | 2660 ± 465  | 2077 ± 507  |
| 204217_s_at | RTN2   | reticulum 2                                              | <b>-0.0471</b>   | 0.1056            | -0.2461          | 0.3288            | 0.1788        | 380 ± 28    | 354 ± 46    | 382 ± 39    | 277 ± 33    |
| 219549_s_at | RTN3   | reticulum 3                                              | <b>-0.0005</b>   | <b>0.0017</b>     | -0.2428          | 0.4707            | 0.1198        | 9500 ± 771  | 8770 ± 1125 | 7539 ± 384  | 6425 ± 1285 |
| 211509_s_at | RTN4   | reticulum 4                                              | <b>-0.0035</b>   | 0.0758            | -0.1239          | -0.3497           | 0.1659        | 12171 ± 355 | 12167 ± 350 | 1415 ± 534  | 10560 ± 855 |
| 212438_at   | RY1    | putative nucleic acid binding protein RY-1               | <b>-0.0145</b>   | 0.1005            | -0.1391          | <b>0.0015</b>     | <b>0.0074</b> | 600 ± 51    | 452 ± 21    | 410 ± 32    | 478 ± 25    |
| 212440_at   | RY1    | putative nucleic acid binding protein RY-1               | <b>-0.0161</b>   | <b>0.0029</b>     | -0.3721          | -0.3424           | <b>0.0075</b> | 1292 ± 90   | 1307 ± 103  | 1090 ± 100  | 817 ± 83    |
| 213262_at   | SACS   | spastic ataxia of Charlevoix-Saguenay                    | <b>-0.0127</b>   | <b>0.0479</b>     | -0.1433          | 0.0913            | <b>0.0066</b> | 1103 ± 93   | 1018 ± 94   | 1022 ± 53   | 700 ± 54    |
| 208742_s_at | SAP18  | sin3-associated polypeptide, 18kDa                       | -0.0582          | <b>0.0179</b>     | -0.4237          | 0.2564            | 0.0747        | 1663 ± 153  | 1465 ± 205  | 1176 ± 93   | 1051 ± 229  |
| 210592_s_at | SAT    | spermidine/spermine N1-acetyltransferase                 | <b>-0.0037</b>   | 0.3238            | <b>-0.0208</b>   | 0.4136            | 0.3122        | 5993 ± 501  | 5236 ± 280  | 4845 ± 324  | 4789 ± 827  |
| 211423_s_at | SC5DL  | sterol-C5-desaturase -like                               | <b>-0.0282</b>   | 0.2729            | -0.4559          | 0.3318            | 0.5457        | 1344 ± 119  | 1279 ± 120  | 1121 ± 118  | 1147 ± 156  |
| 203231_s_at | SCA1   | spinocerebellar ataxia 1                                 | -0.0856          | <b>0.0133</b>     | 0.2071           | 0.3996            | <b>0.0007</b> | 558 ± 96    | 727 ± 98    | 183 ± 16    | 366 ± 95    |
| 212416_at   | SCAMP1 | secretory carrier membrane protein 1                     | <b>-0.0195</b>   | 0.1123            | -0.1057          | -0.3004           | 0.1636        | 3165 ± 134  | 2921 ± 221  | 3105 ± 132  | 2567 ± 296  |
| 206668_s_at | SCAMP1 | secretory carrier membrane protein 1                     | <b>-0.0488</b>   | <b>0.0290</b>     | 0.2270           | -0.2586           | 0.2039        | 126 ± 19    | 102 ± 16    | 78 ± 8      | 82 ± 23     |
| 204362_at   | SCAP2  | src family associated phosphoprotein 2                   | <b>-0.0078</b>   | <b>0.0063</b>     | -0.2109          | 0.1617            | 0.1435        | 369 ± 31    | 365 ± 34    | 305 ± 23    | 281 ± 34    |
| 219196_at   | SCG3   | secretogranin III                                        | <b>-0.0476</b>   | <b>0.0119</b>     | -0.2714          | -0.3141           | <b>0.0411</b> | 477 ± 64    | 352 ± 62    | 301 ± 59    | 220 ± 61    |
| 204030_s_at | SCHIP1 | schwannomin interacting protein 1                        | <b>-0.0223</b>   | 0.3671            | 0.4623           | 0.2794            | 0.2567        | 3214 ± 223  | 3205 ± 161  | 2592 ± 226  | 2927 ± 341  |
| 210383_at   | SCN1A  | sodium channel, voltage-gated, type I, alpha polypeptide | <b>-0.0438</b>   | <b>0.0207</b>     | 0.2869           | -0.0713           | 0.0931        | 684 ± 46    | 640 ± 141   | 531 ± 42    | 392 ± 75    |

| Probe set   | Name     | Description                                                   | NFT <sub>0</sub> | MMSE <sub>0</sub> | NFT <sub>1</sub> | MMSE <sub>1</sub> | ANOVA         | Control    | Incipient   | Moderate   | Severe      |
|-------------|----------|---------------------------------------------------------------|------------------|-------------------|------------------|-------------------|---------------|------------|-------------|------------|-------------|
| 206381_at   | SCN2A2   | sodium channel, voltage-gated, type II, alpha 2 polypeptide   | <b>-0.0154</b>   | <b>0.0222</b>     | <b>-0.0122</b>   | 0.1496            | 0.0865        | 372 ± 43   | 390 ± 64    | 279 ± 27   | 235 ± 51    |
| 210432_s_at | SCN3A    | sodium channel, voltage-gated, type III, alpha polypeptide    | <b>-0.0104</b>   | <b>0.0127</b>     | -0.4237          | -0.3692           | 0.0948        | 1177 ± 57  | 951 ± 143   | 1090 ± 179 | 673 ± 160   |
| 201339_s_at | SCP2     | sterol carrier protein 2                                      | <b>-0.0225</b>   | 0.0592            | -0.3626          | -0.4427           | 0.1686        | 810 ± 64   | 780 ± 119   | 612 ± 64   | 570 ± 105   |
| 205475_at   | SCRG1    | scrapie responsive protein 1                                  | <b>-0.0080</b>   | 0.0694            | -0.3106          | 0.3400            | 0.2099        | 3178 ± 354 | 2698 ± 308  | 2399 ± 387 | 2241 ± 220  |
| 202228_s_at | SDFR1    | stromal cell derived factor receptor 1                        | <b>-0.0024</b>   | <b>0.0112</b>     | 0.4220           | 0.2245            | 0.1066        | 8341 ± 809 | 7819 ± 1144 | 6616 ± 680 | 5052 ± 1179 |
| 201093_x_at | SDHA     | succinate dehydrogenase complex, subunit A, flavoprotein      | <b>-0.0350</b>   | 0.0601            | <b>-0.0064</b>   | 0.2115            | <b>0.0214</b> | 797 ± 39   | 635 ± 87    | 501 ± 13   | 574 ± 92    |
| 202675_at   | SDHB     | succinate dehydrogenase complex, subunit B, iron sulfur       | <b>-0.0209</b>   | <b>0.0456</b>     | -0.0635          | 0.2201            | 0.0899        | 342 ± 25   | 352 ± 28    | 295 ± 26   | 229 ± 59    |
| 202026_at   | SDHD     | succinate dehydrogenase complex D                             | <b>-0.0016</b>   | <b>0.0009</b>     | -0.2028          | 0.2856            | <b>0.0464</b> | 638 ± 65   | 520 ± 67    | 408 ± 34   | 443 ± 72    |
| 207707_s_at | SEC13L1  | SEC13-like 1                                                  | <b>-0.0209</b>   | 0.3417            | -0.1791          | 0.4572            | 0.4523        | 800 ± 38   | 771 ± 77    | 678 ± 23   | 754 ± 81    |
| 201583_s_at | SEC23B   | Sec23 homolog B                                               | -0.1008          | <b>0.0249</b>     | -0.0902          | <b>0.0112</b>     | <b>0.0198</b> | 477 ± 37   | 371 ± 28    | 355 ± 20   | 372 ± 24    |
| 222127_s_at | SEC3     | Sec3-like                                                     | <b>-0.0085</b>   | 0.1891            | 0.3149           | -0.2923           | 0.3365        | 1597 ± 61  | 1554 ± 128  | 1483 ± 112 | 1315 ± 140  |
| 205352_at   | SERPINI1 | serine proteinase inhibitor, clade I , member 1               | <b>-0.0017</b>   | <b>0.0287</b>     | 0.1193           | 0.4948            | <b>0.0022</b> | 3672 ± 534 | 2816 ± 496  | 1752 ± 119 | 1388 ± 284  |
| 213609_s_at | SEZ6L    | seizure related 6 homolog -like                               | -0.0849          | <b>0.0390</b>     | 0.1896           | 0.1873            | 0.3119        | 1291 ± 245 | 1220 ± 164  | 896 ± 58   | 898 ± 208   |
| 211894_x_at | SEZ6L    | seizure related 6 homolog -like                               | <b>-0.0360</b>   | <b>0.0347</b>     | 0.0935           | <b>-0.0057</b>    | <b>0.0127</b> | 522 ± 37   | 589 ± 60    | 375 ± 32   | 419 ± 57    |
| 201586_s_at | SFPQ     | splicing factor proline/glutamine rich                        | -0.1449          | <b>0.0385</b>     | 0.4017           | -0.4022           | 0.1683        | 665 ± 38   | 664 ± 108   | 550 ± 68   | 417 ± 108   |
| 200754_x_at | SFRS2    | splicing factor, arginine/serine-rich 2                       | <b>-0.0090</b>   | 0.3495            | -0.1754          | -0.2958           | 0.4427        | 1753 ± 72  | 1710 ± 151  | 1426 ± 117 | 1540 ± 267  |
| 214882_s_at | SFRS2    | splicing factor, arginine/serine-rich 2                       | <b>-0.0175</b>   | 0.1984            | -0.3325          | 0.4400            | 0.1506        | 807 ± 66   | 784 ± 44    | 601 ± 28   | 710 ± 100   |
| 208673_s_at | SFRS3    | splicing factor, arginine/serine-rich 3                       | <b>-0.0366</b>   | <b>0.0188</b>     | -0.1667          | 0.3371            | <b>0.0067</b> | 572 ± 40   | 699 ± 94    | 582 ± 32   | 360 ± 44    |
| 212266_s_at | SFRS5    | splicing factor, arginine/serine-rich 5                       | <b>-0.0087</b>   | 0.1147            | -0.0891          | 0.0979            | 0.2947        | 3618 ± 287 | 3463 ± 268  | 3024 ± 153 | 3199 ± 204  |
| 210077_s_at | SFRS5    | splicing factor, arginine/serine-rich 5                       | <b>-0.0321</b>   | <b>0.0105</b>     | -0.4921          | 0.1795            | <b>0.0230</b> | 173 ± 33   | 140 ± 17    | 154 ± 19   | 60 ± 13     |
| 203889_at   | SGNE1    | secretory granule, neuroendocrine protein 1                   | <b>-0.0266</b>   | <b>0.0374</b>     | -0.2030          | -0.4626           | <b>0.0527</b> | 4541 ± 661 | 3594 ± 522  | 2643 ± 367 | 2566 ± 613  |
| 201312_s_at | SH3BGR1  | SH3 domain binding glutamic acid-rich protein like            | <b>-0.0051</b>   | 0.1004            | -0.4690          | -0.1642           | 0.1710        | 3263 ± 211 | 3215 ± 450  | 2635 ± 204 | 2465 ± 307  |
| 201311_s_at | SH3BGR1  | SH3 domain binding glutamic acid-rich protein like            | <b>-0.0441</b>   | 0.0571            | -0.3366          | 0.2349            | 0.1859        | 673 ± 71   | 569 ± 104   | 499 ± 50   | 451 ± 65    |
| 218813_s_at | SH3GLB2  | SH3-domain GRB2-like endophilin B2                            | <b>-0.0508</b>   | <b>0.0307</b>     | -0.4020          | 0.4245            | 0.0711        | 547 ± 41   | 600 ± 36    | 562 ± 30   | 426 ± 62    |
| 204019_s_at | SH3YL1   | likely ortholog of mouse Sh3 domain YSC-like 1                | <b>-0.0010</b>   | <b>0.0004</b>     | -0.2355          | 0.3404            | 0.0761        | 1622 ± 47  | 1566 ± 129  | 1560 ± 104 | 1283 ± 92   |
| 213308_at   | SHANK2   | SH3 and multiple ankyrin repeat domains 2                     | <b>-0.0229</b>   | <b>0.0109</b>     | 0.2876           | 0.1151            | <b>0.0111</b> | 995 ± 60   | 943 ± 114   | 840 ± 71   | 600 ± 83    |
| 206330_s_at | SHC3     | neuronal Shc                                                  | -0.3411          | <b>0.0492</b>     | -0.2830          | -0.4775           | 0.1666        | 377 ± 82   | 386 ± 75    | 394 ± 107  | 138 ± 37    |
| 220979_s_at | SIAT7E   | likely orth. m. sialyltransferase 7 E                         | <b>-0.0042</b>   | <b>0.0044</b>     | -0.1175          | <b>0.0358</b>     | <b>0.0339</b> | 1914 ± 439 | 1296 ± 304  | 750 ± 68   | 697 ± 135   |
| 201381_x_at | SIP      | Siah-interacting protein                                      | <b>-0.0120</b>   | <b>0.0257</b>     | -0.1617          | 0.1517            | 0.0727        | 2353 ± 238 | 2264 ± 116  | 1901 ± 161 | 1598 ± 237  |
| 210691_s_at | SIP      | Siah-interacting protein                                      | <b>-0.0066</b>   | <b>0.0462</b>     | -0.2290          | 0.1790            | 0.0961        | 339 ± 47   | 268 ± 39    | 223 ± 16   | 207 ± 45    |
| 211761_s_at | SIP      | Siah-interacting protein                                      | <b>-0.0413</b>   | <b>0.0253</b>     | -0.4400          | -0.2261           | 0.1357        | 3044 ± 308 | 2671 ± 295  | 2194 ± 185 | 2334 ± 283  |
| 217761_at   | SIPL     | SIPL protein                                                  | <b>-0.0337</b>   | 0.3120            | 0.1095           | <b>-0.0294</b>    | 0.2446        | 1109 ± 72  | 1187 ± 113  | 994 ± 56   | 981 ± 53    |
| 221562_s_at | SIRT3    | sirtuin silent mating type information regulation 2 homolog 3 | <b>-0.0237</b>   | <b>0.0048</b>     | -0.4712          | 0.4585            | <b>0.0463</b> | 312 ± 22   | 281 ± 42    | 296 ± 29   | 192 ± 29    |
| 210040_at   | SLC12A5  | solute carrier family 12, member 5                            | <b>-0.0060</b>   | <b>0.0024</b>     | -0.4417          | 0.1041            | <b>0.0310</b> | 4065 ± 592 | 3201 ± 518  | 2646 ± 410 | 1941 ± 338  |
| 213664_at   | SLC1A1   | solute carrier family 1, member 1                             | <b>-0.0351</b>   | <b>0.0154</b>     | 0.2701           | -0.1302           | <b>0.0197</b> | 1294 ± 135 | 1000 ± 111  | 894 ± 86   | 749 ± 136   |
| 209610_s_at | SLC1A4   | solute carrier family 1, member 4                             | -0.0626          | <b>0.0145</b>     | 0.1458           | 0.2202            | 0.0557        | 1176 ± 82  | 1415 ± 179  | 1147 ± 143 | 862 ± 101   |
| 220460_at   | SLC21A14 | solute carrier family 21, member 14                           | <b>-0.0291</b>   | <b>0.0275</b>     | -0.3200          | 0.3830            | <b>0.0478</b> | 1341 ± 118 | 1405 ± 217  | 1155 ± 173 | 796 ± 68    |
| 207088_s_at | SLC25A11 | solute carrier family 25, member 11                           | <b>-0.0002</b>   | <b>0.0001</b>     | -0.2924          | 0.1494            | 0.1177        | 599 ± 27   | 580 ± 48    | 464 ± 35   | 462 ± 82    |
| 203340_s_at | SLC25A12 | solute carrier family 25, member 12                           | <b>-0.0207</b>   | <b>0.0246</b>     | -0.3285          | 0.2534            | <b>0.0006</b> | 663 ± 59   | 551 ± 57    | 434 ± 36   | 335 ± 40    |

| Probe set   | Name     | Description                                                   | NFT <sub>0</sub> | MMSE <sub>0</sub> | NFT <sub>1</sub> | MMSE <sub>1</sub> | ANOVA         | Control     | Incipient   | Moderate   | Severe      |
|-------------|----------|---------------------------------------------------------------|------------------|-------------------|------------------|-------------------|---------------|-------------|-------------|------------|-------------|
| 203339_at   | SLC25A12 | solute carrier family 25 , member 12                          | <b>-0.0199</b>   | <b>0.0192</b>     | -0.3401          | 0.0667            | <b>0.0243</b> | 664 ± 104   | 492 ± 72    | 333 ± 27   | 410 ± 48    |
| 211855_s_at | SLC25A14 | solute carrier family 25 , member 14                          | <b>-0.0500</b>   | <b>0.0498</b>     | -0.3848          | 0.4708            | 0.2494        | 144 ± 19    | 137 ± 36    | 114 ± 15   | 80 ± 25     |
| 204587_at   | SLC25A14 | solute carrier family 25 , member 14                          | <b>-0.0349</b>   | <b>0.0459</b>     | -0.4448          | 0.0818            | <b>0.0372</b> | 692 ± 84    | 559 ± 62    | 421 ± 61   | 487 ± 39    |
| 200030_s_at | SLC25A3  | solute carrier family 25 , member 3                           | <b>-0.0159</b>   | <b>0.0195</b>     | -0.1365          | <b>0.0032</b>     | 0.1455        | 4444 ± 593  | 3704 ± 313  | 3094 ± 195 | 3191 ± 555  |
| 200657_at   | SLC25A5  | solute carrier family 25 , member 5                           | -0.0624          | <b>0.0302</b>     | -0.3340          | 0.1666            | 0.1062        | 2119 ± 332  | 1733 ± 233  | 1314 ± 146 | 1357 ± 256  |
| 212826_s_at | SLC25A6  | solute carrier family 25 , member 6                           | <b>-0.0007</b>   | <b>0.0011</b>     | 0.2718           | -0.1912           | <b>0.0121</b> | 2006 ± 86   | 1710 ± 103  | 1907 ± 107 | 1518 ± 121  |
| 203306_s_at | SLC35A1  | solute carrier family 35 , member 1                           | <b>-0.0492</b>   | 0.0717            | 0.2752           | -0.3195           | <b>0.0287</b> | 1087 ± 70   | 1001 ± 94   | 1121 ± 82  | 792 ± 60    |
| 205918_at   | SLC4A3   | solute carrier family 4, anion exchanger, member 3            | -0.0918          | <b>0.0090</b>     | -0.3207          | 0.2133            | <b>0.0432</b> | 603 ± 62    | 481 ± 67    | 552 ± 101  | 300 ± 53    |
| 205152_at   | SLC6A1   | solute carrier family 6 , member 1                            | <b>-0.0074</b>   | <b>0.0049</b>     | -0.1558          | 0.2176            | <b>0.0012</b> | 2529 ± 135  | 2837 ± 101  | 2305 ± 188 | 1605 ± 272  |
| 203909_at   | SLC9A6   | solute carrier family 9 , isoform 6                           | <b>-0.0040</b>   | <b>0.0023</b>     | -0.3805          | 0.3573            | <b>0.0472</b> | 3789 ± 290  | 3130 ± 379  | 2868 ± 278 | 2415 ± 420  |
| 209897_s_at | SLIT2    | slit homolog 2                                                | <b>-0.0028</b>   | <b>0.0013</b>     | -0.2865          | 0.2191            | <b>0.0245</b> | 681 ± 44    | 667 ± 72    | 572 ± 52   | 436 ± 60    |
| 218137_s_at | SMAP1    | stromal membrane-associated protein                           | <b>-0.0024</b>   | <b>0.0019</b>     | 0.4125           | 0.3581            | <b>0.0050</b> | 1008 ± 122  | 829 ± 134   | 551 ± 54   | 513 ± 52    |
| 206542_s_at | SMARCA2  | SWI/SNF rel., matrix assoc., actin dep. reg. of chromatin, a2 | <b>-0.0007</b>   | <b>0.0031</b>     | 0.0674           | 0.4664            | <b>0.0075</b> | 1238 ± 120  | 1069 ± 111  | 912 ± 75   | 685 ± 68    |
| 202983_at   | SMARCA3  | SWI/SNF rel., matrix assoc., actin dep. reg. of chromatin, a3 | <b>-0.0345</b>   | <b>0.0420</b>     | -0.4942          | -0.4088           | <b>0.0168</b> | 1260 ± 105  | 1220 ± 75   | 1044 ± 85  | 860 ± 78    |
| 217766_s_at | SMP1     | small membrane protein 1                                      | <b>-0.0423</b>   | 0.3222            | -0.0968          | 0.3462            | 0.5485        | 1146 ± 34   | 1158 ± 58   | 1178 ± 55  | 1005 ± 167  |
| 208739_x_at | SMT3H2   | SMT3 suppressor of mif two 3 homolog 2                        | <b>-0.0161</b>   | <b>0.0028</b>     | -0.2627          | 0.2009            | 0.1111        | 1364 ± 153  | 1335 ± 208  | 927 ± 79   | 940 ± 178   |
| 202507_s_at | SNAP25   | synaptosomal-associated protein, 25kDa                        | <b>-0.0365</b>   | <b>0.0166</b>     | -0.4790          | -0.1824           | <b>0.0246</b> | 4545 ± 1074 | 3372 ± 874  | 1789 ± 394 | 1157 ± 298  |
| 202508_s_at | SNAP25   | synaptosomal-associated protein, 25kDa                        | <b>-0.0109</b>   | <b>0.0105</b>     | -0.1152          | 0.2436            | 0.0643        | 11531 ± 866 | 1351 ± 1590 | 1315 ± 748 | 7036 ± 1824 |
| 213203_at   | SNAPC5   | small nuclear RNA activating complex, polypeptide 5, 19kDa    | <b>-0.0223</b>   | <b>0.0067</b>     | -0.2161          | 0.4951            | <b>0.0072</b> | 1090 ± 95   | 923 ± 95    | 698 ± 46   | 767 ± 37    |
| 211546_x_at | SNCA     | synuclein, alpha                                              | -0.1254          | <b>0.0248</b>     | -0.4029          | <b>0.0518</b>     | <b>0.0294</b> | 421 ± 53    | 362 ± 35    | 252 ± 16   | 322 ± 39    |
| 209877_at   | SNCG     | synuclein, gamma                                              | <b>-0.0099</b>   | <b>0.0014</b>     | 0.3211           | 0.2990            | <b>0.0170</b> | 500 ± 93    | 499 ± 100   | 472 ± 103  | 91 ± 12     |
| 201939_at   | SNK      | serum-inducible kinase                                        | <b>-0.0402</b>   | <b>0.0188</b>     | 0.2252           | 0.0980            | <b>0.0166</b> | 1700 ± 296  | 1462 ± 327  | 996 ± 190  | 523 ± 161   |
| 218033_s_at | SNN      | stannin                                                       | <b>-0.0060</b>   | <b>0.0059</b>     | -0.4204          | 0.3482            | 0.1365        | 410 ± 40    | 344 ± 35    | 341 ± 23   | 299 ± 26    |
| 209481_at   | SNRK     | SNF-1 related kinase                                          | <b>-0.0458</b>   | <b>0.0478</b>     | 0.2770           | -0.2004           | <b>0.0199</b> | 1464 ± 134  | 1252 ± 164  | 1046 ± 63  | 931 ± 106   |
| 206055_s_at | SNRPA1   | small nuclear ribonucleoprotein polypeptide A'                | <b>-0.0468</b>   | <b>0.0217</b>     | 0.3973           | 0.4243            | 0.0722        | 843 ± 113   | 942 ± 129   | 724 ± 53   | 542 ± 66    |
| 200826_at   | SNRPD2   | small nuclear ribonucleoprotein D2 polypeptide 16.5kDa        | <b>-0.0074</b>   | <b>0.0012</b>     | -0.4747          | 0.2642            | <b>0.0252</b> | 2611 ± 94   | 2699 ± 194  | 2648 ± 107 | 2013 ± 251  |
| 201522_x_at | SNRPN    | small nuclear ribonucleoprotein polypeptide N                 | -0.1142          | <b>0.0481</b>     | -0.4424          | 0.2609            | 0.2432        | 9644 ± 694  | 8567 ± 690  | 8324 ± 448 | 7725 ± 848  |
| 220405_at   | SNTG1    | syntrophin, gamma 1                                           | -0.1008          | <b>0.0247</b>     | -0.4125          | 0.4880            | 0.0867        | 485 ± 39    | 404 ± 45    | 354 ± 45   | 358 ± 31    |
| 218404_at   | SNX10    | sorting nexin 10                                              | <b>-0.0106</b>   | <b>0.0007</b>     | -0.3802          | 0.1610            | <b>0.0152</b> | 1338 ± 207  | 1134 ± 222  | 751 ± 106  | 571 ± 109   |
| 210648_x_at | SNX3     | sorting nexin 3                                               | -0.3846          | <b>0.0327</b>     | -0.0870          | <b>0.0529</b>     | 0.2758        | 7787 ± 562  | 7691 ± 425  | 6730 ± 392 | 6211 ± 1031 |
| 212652_s_at | SNX4     | sorting nexin 4                                               | <b>-0.0242</b>   | 0.3432            | 0.4619           | -0.2176           | 0.4826        | 1024 ± 54   | 1076 ± 36   | 939 ± 51   | 948 ± 103   |
| 214988_s_at | SON      | SON DNA binding protein                                       | <b>-0.0221</b>   | 0.6481            | 0.2869           | -0.2735           | 0.6258        | 3173 ± 143  | 3018 ± 195  | 2882 ± 202 | 2875 ± 224  |
| 215522_at   | SORCS3   | VPS10 domain receptor protein SORCS 3                         | <b>-0.0007</b>   | <b>0.0001</b>     | 0.2821           | 0.1608            | <b>0.0060</b> | 318 ± 33    | 260 ± 38    | 257 ± 39   | 126 ± 11    |
| 217927_at   | SPC12    | signal peptidase 12kDa                                        | <b>-0.0437</b>   | <b>0.0277</b>     | -0.3702          | 0.3880            | <b>0.0013</b> | 2739 ± 273  | 2480 ± 219  | 1800 ± 131 | 1458 ± 138  |
| 210715_s_at | SPINT2   | serine protease inhibitor, Kunitz type, 2                     | <b>-0.0203</b>   | <b>0.0416</b>     | -0.2731          | -0.4742           | 0.2150        | 830 ± 102   | 717 ± 95    | 707 ± 80   | 529 ± 113   |
| 204675_at   | SRD5A1   | steroid-5-alpha-reductase, alpha polypeptide 1                | <b>-0.0534</b>   | <b>0.0239</b>     | 0.2887           | 0.1791            | 0.0834        | 736 ± 146   | 514 ± 75    | 459 ± 58   | 379 ± 63    |
| 205335_s_at | SRP19    | signal recognition particle 19kDa                             | <b>-0.0395</b>   | 0.1380            | -0.1919          | 0.2972            | 0.5435        | 857 ± 38    | 852 ± 50    | 781 ± 49   | 766 ± 78    |
| 203605_at   | SRP54    | signal recognition particle 54kDa                             | <b>-0.0493</b>   | -0.8298           | 0.4281           | <b>-0.0091</b>    | 0.7820        | 562 ± 19    | 594 ± 30    | 541 ± 36   | 564 ± 55    |
| 208801_at   | SRP72    | signal recognition particle 72kDa                             | <b>-0.0268</b>   | 0.1835            | 0.4588           | 0.1944            | 0.5970        | 1397 ± 105  | 1357 ± 96   | 1239 ± 97  | 1223 ± 136  |

| Probe set   | Name    | Description                                               | NFT <sub>0</sub> | MMSE <sub>0</sub> | NFT <sub>1</sub> | MMSE <sub>1</sub> | ANOVA         | Control     | Incipient   | Moderate    | Severe      |
|-------------|---------|-----------------------------------------------------------|------------------|-------------------|------------------|-------------------|---------------|-------------|-------------|-------------|-------------|
| 208802_at   | SRP72   | signal recognition particle 72kDa                         | <b>-0.0282</b>   | <b>0.0004</b>     | -0.3699          | 0.1928            | 0.1923        | 417 ± 24    | 400 ± 35    | 401 ± 36    | 317 ± 41    |
| 203182_s_at | SRPK2   | SFRS protein kinase 2                                     | -0.4388          | <b>0.0328</b>     | -0.1588          | 0.2489            | 0.2437        | 2148 ± 168  | 2067 ± 81   | 1953 ± 82   | 1711 ± 224  |
| 200918_s_at | SRPR    | signal recognition particle receptor                      | -0.4038          | <b>0.0146</b>     | -0.1895          | 0.3093            | 0.1589        | 1232 ± 71   | 1283 ± 77   | 1129 ± 93   | 1033 ± 56   |
| 201138_s_at | SSB     | Sjogren syndrome antigen B                                | <b>-0.0046</b>   | 0.1185            | -0.1328          | 0.2347            | 0.1943        | 491 ± 24    | 443 ± 24    | 387 ± 26    | 412 ± 59    |
| 202591_s_at | SSBP1   | single-stranded DNA binding protein                       | <b>-0.0182</b>   | <b>0.0005</b>     | -0.1698          | <b>0.0036</b>     | <b>0.0031</b> | 785 ± 56    | 819 ± 60    | 631 ± 63    | 452 ± 72    |
| 213921_at   | SST     | somatostatin                                              | <b>-0.0082</b>   | <b>0.0213</b>     | 0.3244           | 0.4693            | <b>0.0006</b> | 1010 ± 123  | 551 ± 89    | 478 ± 88    | 401 ± 52    |
| 219631_at   | ST7     | suppression of tumorigenicity                             | <b>-0.0266</b>   | <b>0.0008</b>     | <b>-0.0283</b>   | <b>0.0213</b>     | 0.0858        | 336 ± 37    | 317 ± 44    | 233 ± 21    | 241 ± 30    |
| 201837_s_at | STAF65  | SPTF-associated factor 65 gamma                           | <b>-0.0062</b>   | <b>0.0220</b>     | -0.1010          | 0.1500            | <b>0.0027</b> | 773 ± 35    | 684 ± 51    | 689 ± 17    | 545 ± 44    |
| 203544_s_at | STAM    | signal transducing adaptor molecule 1                     | <b>-0.0108</b>   | <b>0.0064</b>     | -0.4431          | 0.2823            | 0.1048        | 987 ± 40    | 935 ± 46    | 806 ± 50    | 780 ± 110   |
| 200887_s_at | STAT1   | signal transducer and activator of transcription 1, 91kDa | <b>-0.0238</b>   | 0.1728            | -0.4670          | -0.3556           | 0.3253        | 1692 ± 167  | 1569 ± 215  | 1454 ± 106  | 1250 ± 151  |
| 203372_s_at | STATI2  | STAT induced STAT inhibitor-2                             | -0.4851          | <b>0.0220</b>     | 0.3330           | -0.3020           | 0.2228        | 91 ± 11     | 96 ± 4      | 71 ± 11     | 65 ± 17     |
| 202557_at   | STCH    | stress 70 protein chaperone, microsomal-associated, 60kDa | <b>-0.0340</b>   | 0.0895            | -0.4335          | 0.2295            | 0.2793        | 2473 ± 393  | 1964 ± 360  | 1800 ± 80   | 1648 ± 325  |
| 208855_s_at | STK24   | serine/threonine kinase 24                                | <b>-0.0370</b>   | 0.2495            | -0.2624          | 0.0798            | 0.6884        | 3878 ± 100  | 3850 ± 249  | 3545 ± 216  | 3690 ± 330  |
| 208854_s_at | STK24   | serine/threonine kinase 24                                | <b>-0.0227</b>   | <b>0.0065</b>     | -0.1862          | 0.2980            | 0.0627        | 587 ± 35    | 585 ± 54    | 514 ± 27    | 440 ± 51    |
| 203001_s_at | STMN2   | stathmin-like 2                                           | <b>-0.0542</b>   | <b>0.0090</b>     | -0.4918          | 0.2976            | 0.0902        | 3875 ± 683  | 3084 ± 568  | 2525 ± 541  | 1727 ± 482  |
| 218207_s_at | STMN3   | stathmin-like 3                                           | -0.0950          | <b>0.0154</b>     | 0.0698           | 0.0613            | 0.2851        | 107 ± 14    | 110 ± 25    | 104 ± 8     | 66 ± 20     |
| 204701_s_at | STOML1  | stomatol-like 1                                           | -0.1453          | <b>0.0049</b>     | 0.3473           | 0.2730            | 0.0936        | 636 ± 65    | 550 ± 45    | 523 ± 50    | 407 ± 80    |
| 203767_s_at | STS     | steroid sulfatase, arylsulfatase C, isozyme S             | <b>-0.0473</b>   | 0.2639            | 0.1749           | 0.2293            | 0.3079        | 316 ± 48    | 305 ± 41    | 211 ± 24    | 276 ± 53    |
| 204729_s_at | STX1A   | syntaxin 1A                                               | -0.0713          | <b>0.0138</b>     | -0.2916          | 0.0646            | <b>0.0123</b> | 1284 ± 103  | 982 ± 111   | 828 ± 88    | 938 ± 84    |
| 202260_s_at | STXBP1  | syntaxin binding protein 1                                | <b>-0.0118</b>   | <b>0.0389</b>     | -0.2668          | -0.4423           | 0.0843        | 7424 ± 848  | 6370 ± 1152 | 5270 ± 910  | 4162 ± 640  |
| 202930_s_at | SUCLA2  | succinate-CoA ligase, ADP-forming, beta subunit           | <b>-0.0486</b>   | <b>0.0101</b>     | -0.1502          | -0.3065           | 0.1587        | 857 ± 99    | 842 ± 115   | 608 ± 72    | 578 ± 140   |
| 219425_at   | SULT4A1 | sulfotransferase family 4A, member 1                      | <b>-0.0511</b>   | <b>0.0355</b>     | 0.4968           | 0.2988            | 0.3413        | 1675 ± 215  | 1653 ± 288  | 1370 ± 186  | 1177 ± 169  |
| 201484_at   | SUPT4H1 | suppressor of Ty 4 homolog 1                              | <b>-0.0258</b>   | <b>0.0037</b>     | -0.3931          | 0.4284            | <b>0.0407</b> | 660 ± 23    | 603 ± 58    | 549 ± 24    | 519 ± 36    |
| 203069_at   | SV2     | synaptic vesicle glycoprotein 2                           | <b>-0.0128</b>   | <b>0.0008</b>     | -0.4907          | 0.3543            | <b>0.0212</b> | 3382 ± 509  | 2742 ± 431  | 1937 ± 302  | 1670 ± 207  |
| 205551_at   | SV2B    | synaptic vesicle protein 2B homolog                       | <b>-0.0430</b>   | <b>0.0131</b>     | -0.3641          | 0.2338            | <b>0.0132</b> | 4014 ± 470  | 3405 ± 373  | 2712 ± 439  | 1959 ± 380  |
| 202829_s_at | SYBL1   | synaptobrevin-like 1                                      | <b>-0.0280</b>   | 0.1421            | 0.0626           | <b>-0.0182</b>    | 0.0859        | 1176 ± 44   | 1317 ± 76   | 1141 ± 82   | 1056 ± 61   |
| 221914_at   | SYN1    | synapsin I                                                | <b>-0.0121</b>   | <b>0.0009</b>     | -0.2686          | 0.2340            | 0.2311        | 3781 ± 463  | 3337 ± 475  | 2951 ± 484  | 2442 ± 412  |
| 210315_at   | SYN2    | synapsin II                                               | -0.0642          | <b>0.0119</b>     | -0.1093          | 0.1424            | 0.0898        | 145 ± 20    | 115 ± 22    | 94 ± 19     | 67 ± 23     |
| 204287_at   | SYNGR1  | synaptogyrin 1                                            | -0.2070          | <b>0.0343</b>     | 0.3140           | 0.4147            | 0.2651        | 2304 ± 257  | 2213 ± 292  | 1878 ± 233  | 1703 ± 106  |
| 205691_at   | SYNGR3  | synaptogyrin 3                                            | <b>-0.0357</b>   | <b>0.0081</b>     | 0.3796           | 0.2987            | <b>0.0101</b> | 2816 ± 360  | 2173 ± 386  | 1765 ± 304  | 1160 ± 214  |
| 212990_at   | SYNJ1   | synaptojanin 1                                            | <b>-0.0145</b>   | <b>0.0179</b>     | -0.4354          | 0.1763            | 0.0558        | 2350 ± 384  | 1836 ± 246  | 1507 ± 188  | 1240 ± 241  |
| 207594_s_at | SYNJ1   | synaptojanin 1                                            | <b>-0.0051</b>   | <b>0.0031</b>     | -0.3540          | 0.3912            | <b>0.0230</b> | 192 ± 20    | 152 ± 17    | 125 ± 15    | 130 ± 6     |
| 203999_at   | SYT1    | synaptotagmin I                                           | <b>-0.0196</b>   | <b>0.0046</b>     | -0.4110          | 0.3414            | <b>0.0329</b> | 3782 ± 1887 | 1079 ± 1556 | 3367 ± 1588 | 6527 ± 1869 |
| 203998_s_at | SYT1    | synaptotagmin I                                           | <b>-0.0073</b>   | <b>0.0015</b>     | -0.2139          | <b>0.0132</b>     | <b>0.0260</b> | 471 ± 111   | 412 ± 131   | 127 ± 30    | 113 ± 42    |
| 206162_x_at | SYT5    | synaptotagmin V                                           | -0.0687          | <b>0.0497</b>     | 0.2373           | 0.3148            | 0.2357        | 507 ± 140   | 385 ± 61    | 278 ± 67    | 249 ± 69    |
| 206552_s_at | TAC1    | tachykinin, precursor 1                                   | <b>-0.0117</b>   | <b>0.0442</b>     | -0.4349          | 0.4177            | <b>0.0006</b> | 1079 ± 171  | 432 ± 97    | 373 ± 80    | 305 ± 84    |
| 211382_s_at | TACC2   | transforming, acidic coiled-coil containing protein 2     | <b>-0.0027</b>   | <b>0.0248</b>     | 0.1141           | -0.0949           | 0.2703        | 352 ± 21    | 371 ± 28    | 323 ± 31    | 273 ± 52    |
| 201839_s_at | TACSTD1 | tumor-associated calcium signal transducer 1              | -0.3997          | <b>0.0362</b>     | 0.1962           | 0.2095            | 0.2111        | 245 ± 60    | 199 ± 32    | 140 ± 18    | 143 ± 28    |
| 202168_at   | TAF9    | TAF9 RNA polymerase II, TATA box BP associated factor     | <b>-0.0464</b>   | <b>0.0125</b>     | 0.3732           | 0.1445            | 0.0726        | 1035 ± 72   | 1131 ± 93   | 1013 ± 85   | 765 ± 124   |



| Probe set   | Name           | Description                                                 | NFT <sub>0</sub> | MMSE <sub>0</sub> | NFT <sub>1</sub> | MMSE <sub>1</sub> | ANOVA         | Control     | Incipient   | Moderate   | Severe     |
|-------------|----------------|-------------------------------------------------------------|------------------|-------------------|------------------|-------------------|---------------|-------------|-------------|------------|------------|
| 212978_at   | TA-LRRP        | T-cell activation leucine repeat-rich protein               | <b>-0.0121</b>   | <b>0.0502</b>     | 0.4617           | 0.3335            | 0.2215        | 986 ± 92    | 887 ± 114   | 774 ± 43   | 741 ± 109  |
| 212976_at   | TA-LRRP        | T-cell activation leucine repeat-rich protein               | <b>-0.0024</b>   | <b>0.0026</b>     | 0.2675           | 0.0968            | <b>0.0260</b> | 610 ± 94    | 427 ± 59    | 493 ± 50   | 293 ± 36   |
| 202813_at   | TARBP1         | TAR RNA binding protein 1                                   | <b>-0.0361</b>   | <b>0.0021</b>     | <b>0.0402</b>    | -0.2729           | <b>0.0230</b> | 777 ± 102   | 638 ± 49    | 567 ± 62   | 415 ± 72   |
| 203667_at   | TBCA           | tubulin-specific chaperone a                                | <b>-0.0001</b>   | <b>0.0011</b>     | <b>-0.0542</b>   | 0.1725            | <b>0.0055</b> | 1991 ± 145  | 2086 ± 150  | 1714 ± 59  | 1423 ± 65  |
| 218520_at   | TBK1           | TANK-binding kinase 1                                       | <b>-0.0194</b>   | 0.0646            | -0.1486          | -0.4559           | 0.1405        | 933 ± 60    | 871 ± 85    | 838 ± 44   | 717 ± 68   |
| 208398_s_at | TBPL1          | TBP-like 1                                                  | <b>-0.0193</b>   | <b>0.0248</b>     | -0.3780          | -0.4171           | <b>0.0018</b> | 1556 ± 77   | 1228 ± 78   | 1154 ± 118 | 977 ± 96   |
| 204045_at   | TCEAL1         | transcription elongation factor A -like 1                   | <b>-0.0035</b>   | <b>0.0061</b>     | -0.4342          | 0.2097            | 0.0658        | 1302 ± 114  | 1181 ± 111  | 1004 ± 87  | 887 ± 140  |
| 202396_at   | TCERG1         | transcription elongation regulator 1                        | <b>-0.0046</b>   | <b>0.0537</b>     | -0.1867          | 0.3522            | 0.1322        | 1072 ± 67   | 951 ± 100   | 951 ± 51   | 809 ± 87   |
| 203303_at   | TCTE1L         | t-complex-associated-testis-expressed 1-like                | <b>-0.0021</b>   | <b>0.0025</b>     | -0.2920          | 0.2183            | <b>0.0488</b> | 3263 ± 293  | 2829 ± 248  | 2601 ± 152 | 2249 ± 268 |
| 221471_at   | TDE1           | tumor differentially expressed 1                            | <b>-0.0034</b>   | <b>0.0204</b>     | 0.1882           | -0.2165           | <b>0.0171</b> | 1894 ± 138  | 1665 ± 190  | 1438 ± 98  | 1198 ± 175 |
| 200803_s_at | TEGT           | testis enhanced gene transcript                             | <b>-0.0362</b>   | 0.1443            | -0.0987          | -0.4645           | 0.3182        | 1384 ± 176  | 1239 ± 142  | 1117 ± 132 | 1006 ± 64  |
| 212330_at   | TFDP1          | transcription factor Dp-1                                   | <b>-0.0150</b>   | 0.1940            | <b>-0.0179</b>   | 0.4048            | 0.3835        | 464 ± 13    | 404 ± 34    | 395 ± 37   | 392 ± 44   |
| 207332_s_at | TFRC           | transferrin receptor                                        | <b>-0.0219</b>   | <b>0.0179</b>     | -0.4813          | 0.3791            | <b>0.0469</b> | 832 ± 50    | 949 ± 58    | 770 ± 70   | 653 ± 90   |
| 213869_x_at | THY1           | Thy-1 cell surface antigen                                  | -0.2079          | <b>0.0058</b>     | 0.3711           | 0.1148            | 0.1085        | 2286 ± 119  | 2493 ± 284  | 2287 ± 229 | 1749 ± 161 |
| 215171_s_at | TIMM17A        | translocase of inner mitochondrial membrane 17 homolog A    | <b>-0.0084</b>   | <b>0.0039</b>     | -0.3795          | -0.3761           | 0.1154        | 1688 ± 153  | 1444 ± 146  | 1360 ± 113 | 1189 ± 158 |
| 218118_s_at | TIMM23         | translocase of inner mitochondrial membrane 23 homolog      | <b>-0.0026</b>   | <b>0.0310</b>     | 0.4872           | 0.4634            | <b>0.0144</b> | 411 ± 41    | 399 ± 84    | 326 ± 34   | 159 ± 35   |
| 208838_at   | TIP120A        | TBP-interacting protein                                     | <b>-0.0431</b>   | 0.1078            | -0.1124          | 0.3585            | 0.1451        | 808 ± 63    | 680 ± 80    | 663 ± 40   | 643 ± 13   |
| 202606_s_at | TLK1           | tousled-like kinase 1                                       | <b>-0.0070</b>   | <b>0.0041</b>     | -0.3843          | -0.4396           | <b>0.0530</b> | 1258 ± 109  | 1102 ± 121  | 920 ± 83   | 853 ± 126  |
| 202242_at   | TM4SF2         | transmembrane 4 superfamily member 2                        | <b>-0.0122</b>   | <b>0.0089</b>     | 0.3596           | 0.3278            | <b>0.0470</b> | 4879 ± 455  | 4802 ± 706  | 3690 ± 528 | 2830 ± 552 |
| 219892_at   | TM6SF1         | transmembrane 6 superfamily member 1                        | <b>-0.0109</b>   | 0.3514            | 0.3206           | <b>-0.0518</b>    | 0.3221        | 385 ± 21    | 350 ± 53    | 297 ± 29   | 315 ± 40   |
| 205123_s_at | TMEFF1         | TM protein with EGF-like and two follistatin-like domains 1 | <b>-0.0237</b>   | 0.2855            | 0.4337           | -0.3300           | 0.0646        | 296 ± 28    | 289 ± 37    | 191 ± 29   | 261 ± 18   |
| 202857_at   | TMEM4          | transmembrane protein 4                                     | <b>-0.0225</b>   | <b>0.0138</b>     | -0.0604          | <b>0.0329</b>     | <b>0.0252</b> | 1088 ± 71   | 1006 ± 37   | 961 ± 45   | 792 ± 88   |
| 204807_at   | TMEM5          | transmembrane protein 5                                     | <b>-0.0456</b>   | 0.9518            | <b>0.0098</b>    | -0.2105           | 0.0987        | 162 ± 12    | 187 ± 10    | 136 ± 6    | 172 ± 22   |
| 203661_s_at | TMOD           | tropomodulin                                                | <b>-0.0043</b>   | <b>0.0005</b>     | -0.2794          | -0.3898           | 0.0833        | 569 ± 30    | 480 ± 35    | 488 ± 35   | 436 ± 45   |
| 217733_s_at | TMSB10         | thymosin, beta 10                                           | <b>-0.0025</b>   | <b>0.0188</b>     | -0.2874          | -0.2106           | <b>0.0009</b> | 11347 ± 750 | 1152 ± 1103 | 9556 ± 345 | 6674 ± 407 |
| 214581_x_at | TNFRSF21       | tumor necrosis factor receptor superfamily, member 21       | <b>-0.0376</b>   | <b>0.0426</b>     | 0.4443           | 0.1595            | <b>0.0246</b> | 191 ± 17    | 186 ± 36    | 127 ± 20   | 93 ± 26    |
| 218856_at   | TNFRSF21       | tumor necrosis factor receptor superfamily, member 21       | <b>-0.0060</b>   | <b>0.0004</b>     | -0.2306          | <b>0.0133</b>     | 0.0902        | 1112 ± 81   | 1234 ± 128  | 916 ± 55   | 938 ± 99   |
| 215108_x_at | TNRC9          | trinucleotide repeat containing 9                           | <b>-0.0057</b>   | <b>0.0018</b>     | -0.0905          | 0.1515            | <b>0.0004</b> | 298 ± 27    | 201 ± 22    | 216 ± 27   | 117 ± 14   |
| 214774_x_at | TNRC9          | trinucleotide repeat containing 9                           | <b>-0.0045</b>   | <b>0.0040</b>     | <b>-0.0542</b>   | 0.0688            | <b>0.0017</b> | 523 ± 41    | 385 ± 56    | 383 ± 36   | 262 ± 33   |
| 216623_x_at | TNRC9          | trinucleotide repeat containing 9                           | <b>-0.0082</b>   | <b>0.0073</b>     | <b>-0.0003</b>   | 0.0978            | <b>0.0080</b> | 320 ± 20    | 265 ± 23    | 222 ± 16   | 203 ± 34   |
| 200662_s_at | TOMM20-PENDING | translocase of outer mitochondrial membrane 20 homolog      | -0.0556          | <b>0.0054</b>     | 0.4855           | 0.4525            | <b>0.0455</b> | 4203 ± 626  | 3592 ± 668  | 3005 ± 357 | 1943 ± 207 |
| 201519_at   | TOMM70A        | translocase of outer mitochondrial membrane 70 homolog A    | <b>-0.0349</b>   | 0.2320            | -0.4574          | 0.2939            | 0.4065        | 2502 ± 166  | 2452 ± 153  | 2104 ± 114 | 2350 ± 264 |
| 208901_s_at | TOP1           | topoisomerase I                                             | <b>-0.0078</b>   | <b>0.0061</b>     | -0.3674          | 0.1257            | <b>0.0020</b> | 997 ± 66    | 809 ± 63    | 932 ± 50   | 641 ± 45   |
| 204529_s_at | TOX            | thymus high mobility group box protein TOX                  | -0.2258          | <b>0.0222</b>     | -0.4966          | -0.4931           | 0.1277        | 350 ± 61    | 338 ± 78    | 287 ± 32   | 175 ± 21   |
| 203476_at   | TPBG           | trophoblast glycoprotein                                    | <b>-0.0277</b>   | 0.1219            | -0.2377          | 0.4886            | 0.1317        | 306 ± 34    | 277 ± 44    | 201 ± 22   | 236 ± 18   |
| 210372_s_at | TPD52L1        | tumor protein D52-like 1                                    | <b>-0.0341</b>   | 0.0569            | <b>-0.0407</b>   | -0.4850           | 0.1524        | 572 ± 63    | 493 ± 38    | 454 ± 27   | 428 ± 25   |
| 213011_s_at | TPI1           | triosephosphate isomerase 1                                 | <b>-0.0040</b>   | <b>0.0071</b>     | 0.4451           | 0.4236            | <b>0.0201</b> | 5085 ± 324  | 4056 ± 207  | 4120 ± 421 | 3434 ± 384 |
| 200822_x_at | TPI1           | triosephosphate isomerase 1                                 | <b>-0.0152</b>   | <b>0.0012</b>     | 0.3494           | 0.2671            | <b>0.0367</b> | 7114 ± 407  | 6712 ± 410  | 5459 ± 371 | 5381 ± 716 |
| 203846_at   | TRIM32         | tripartite motif-containing 32                              | <b>-0.0148</b>   | 0.1458            | -0.4238          | 0.1861            | <b>0.0109</b> | 544 ± 32    | 511 ± 35    | 361 ± 14   | 490 ± 58   |

| Probe set   | Name    | Description                                            | NFT <sub>0</sub> | MMSE <sub>0</sub> | NFT <sub>1</sub> | MMSE <sub>1</sub> | ANOVA         | Control     | Incipient   | Moderate    | Severe      |
|-------------|---------|--------------------------------------------------------|------------------|-------------------|------------------|-------------------|---------------|-------------|-------------|-------------|-------------|
| 219736_at   | TRIM36  | tripartite motif-containing 36                         | <b>-0.0065</b>   | <b>0.0128</b>     | -0.2024          | 0.4147            | <b>0.0053</b> | 993 ± 201   | 688 ± 153   | 403 ± 78    | 271 ± 34    |
| 213009_s_at | TRIM37  | tripartite motif-containing 37                         | <b>-0.0033</b>   | <b>0.0105</b>     | -0.1883          | 0.4345            | 0.0752        | 4165 ± 413  | 3528 ± 455  | 3064 ± 339  | 2753 ± 340  |
| 212544_at   | TRIP3   | thyroid hormone receptor interactor 3                  | <b>-0.0180</b>   | <b>0.0043</b>     | 0.0631           | -0.1050           | <b>0.0310</b> | 900 ± 45    | 847 ± 54    | 821 ± 24    | 687 ± 60    |
| 211700_s_at | TRO     | trophinin                                              | <b>-0.0280</b>   | 0.0977            | <b>-0.0230</b>   | -0.2825           | 0.1240        | 279 ± 17    | 262 ± 32    | 263 ± 28    | 189 ± 31    |
| 205803_s_at | TRPC1   | transient receptor potential cation channel, C1        | <b>-0.0098</b>   | <b>0.0034</b>     | -0.2895          | -0.1139           | <b>0.0043</b> | 555 ± 56    | 593 ± 68    | 504 ± 41    | 292 ± 26    |
| 214908_s_at | TRRAP   | transformation/transcription domain-associated protein | <b>-0.0019</b>   | <b>0.0220</b>     | 0.3494           | 0.3063            | <b>0.0002</b> | 167 ± 15    | 164 ± 15    | 162 ± 9     | 63 ± 20     |
| 201758_at   | TSG101  | tumor susceptibility gene 101                          | <b>-0.0079</b>   | 0.1476            | -0.2639          | -0.3854           | 0.3445        | 1296 ± 70   | 1317 ± 112  | 1137 ± 52   | 1127 ± 137  |
| 203983_at   | TSNAX   | translin-associated factor X                           | <b>-0.0211</b>   | 0.0629            | 0.2829           | -0.2806           | 0.0904        | 967 ± 94    | 1154 ± 181  | 927 ± 88    | 684 ± 58    |
| 200972_at   | TSPAN-3 | tetraspan 3                                            | <b>-0.0472</b>   | 0.1121            | -0.3408          | -0.2407           | 0.2754        | 4622 ± 145  | 4394 ± 485  | 4124 ± 391  | 3599 ± 417  |
| 200973_s_at | TSPAN-3 | tetraspan 3                                            | <b>-0.0491</b>   | 0.0711            | -0.2721          | 0.3264            | 0.2555        | 1013 ± 146  | 832 ± 203   | 627 ± 88    | 621 ± 188   |
| 221493_at   | TSPYL   | TSPY-like                                              | -0.0808          | <b>0.0179</b>     | -0.4736          | 0.3621            | 0.0903        | 4396 ± 596  | 3623 ± 478  | 3813 ± 339  | 2544 ± 493  |
| 201434_at   | TTC1    | tetratricopeptide repeat domain 1                      | <b>-0.0032</b>   | <b>0.0146</b>     | -0.4034          | 0.1091            | <b>0.0317</b> | 882 ± 55    | 870 ± 30    | 722 ± 38    | 737 ± 53    |
| 208073_x_at | TTC3    | tetratricopeptide repeat domain 3                      | <b>-0.0073</b>   | <b>0.0298</b>     | -0.3931          | <b>0.0351</b>     | 0.0628        | 7305 ± 540  | 6413 ± 444  | 5710 ± 290  | 5751 ± 537  |
| 210645_s_at | TTC3    | tetratricopeptide repeat domain 3                      | <b>-0.0062</b>   | <b>0.0398</b>     | -0.2237          | 0.4764            | 0.1376        | 5465 ± 512  | 4310 ± 409  | 3978 ± 454  | 3936 ± 710  |
| 208661_s_at | TTC3    | tetratricopeptide repeat domain 3                      | <b>-0.0196</b>   | <b>0.0034</b>     | -0.3744          | 0.4543            | 0.3236        | 1102 ± 54   | 1056 ± 113  | 927 ± 51    | 917 ± 112   |
| 209372_x_at | TUBB    | tubulin, beta polypeptide                              | -0.0937          | <b>0.0151</b>     | -0.2977          | 0.1141            | 0.0894        | 643 ± 171   | 416 ± 117   | 384 ± 112   | 122 ± 74    |
| 204141_at   | TUBB    | tubulin, beta polypeptide                              | <b>-0.0254</b>   | <b>0.0031</b>     | -0.1721          | 0.1147            | <b>0.0237</b> | 4264 ± 1764 | 1475 ± 1496 | 1752 ± 1404 | 7064 ± 1549 |
| 208977_x_at | TUBB2   | tubulin, beta, 2                                       | -0.0717          | <b>0.0117</b>     | -0.1275          | 0.1300            | <b>0.0316</b> | 5174 ± 691  | 3430 ± 671  | 3325 ± 440  | 2447 ± 702  |
| 213726_x_at | TUBB2   | tubulin, beta, 2                                       | <b>-0.0454</b>   | <b>0.0071</b>     | -0.2595          | 0.1838            | <b>0.0223</b> | 5931 ± 754  | 4528 ± 795  | 3982 ± 555  | 2703 ± 649  |
| 202154_x_at | TUBB4   | tubulin, beta, 4                                       | <b>-0.0493</b>   | <b>0.0097</b>     | -0.2211          | 0.0852            | <b>0.0502</b> | 4145 ± 593  | 3127 ± 660  | 2791 ± 400  | 1861 ± 539  |
| 213476_x_at | TUBB4   | tubulin, beta, 4                                       | <b>-0.0054</b>   | <b>0.0000</b>     | -0.3823          | <b>0.0107</b>     | 0.0579        | 4953 ± 790  | 3568 ± 750  | 3288 ± 467  | 2154 ± 709  |
| 203894_at   | TUBG2   | tubulin, gamma 2                                       | <b>-0.0004</b>   | <b>0.0000</b>     | 0.4031           | 0.3653            | <b>0.0000</b> | 1044 ± 50   | 819 ± 38    | 788 ± 45    | 630 ± 20    |
| 201113_at   | TUFM    | Tu translation elongation factor, mitochondrial        | -0.0712          | <b>0.0437</b>     | -0.2649          | 0.3000            | 0.2667        | 1379 ± 72   | 1367 ± 206  | 1172 ± 70   | 1068 ± 151  |
| 208864_s_at | TXN     | thioredoxin                                            | <b>-0.0261</b>   | 0.1063            | -0.4860          | 0.2871            | 0.2129        | 1421 ± 136  | 1141 ± 134  | 1107 ± 101  | 1039 ± 179  |
| 209340_at   | UAP1    | UDP-N-acetylglucosamine pyrophosphorylase 1            | -0.0700          | <b>0.0208</b>     | 0.1624           | -0.4355           | <b>0.0015</b> | 631 ± 38    | 644 ± 40    | 694 ± 31    | 450 ± 50    |
| 208980_s_at | UBC     | ubiquitin C                                            | <b>-0.0071</b>   | 0.1540            | <b>-0.0522</b>   | 0.4865            | 0.1939        | 0129 ± 1419 | 7932 ± 1243 | 7778 ± 489  | 6253 ± 1350 |
| 209115_at   | UBE1C   | ubiquitin-activating enzyme E1C                        | <b>-0.0279</b>   | 0.0992            | -0.4097          | <b>-0.0057</b>    | <b>0.0180</b> | 1170 ± 52   | 1242 ± 152  | 1239 ± 127  | 767 ± 47    |
| 201899_s_at | UBE2A   | ubiquitin-conjugating enzyme E2A                       | <b>-0.0369</b>   | 0.1275            | -0.4841          | 0.4540            | 0.2182        | 1501 ± 76   | 1459 ± 59   | 1336 ± 71   | 1300 ± 97   |
| 202333_s_at | UBE2B   | ubiquitin-conjugating enzyme E2B                       | <b>-0.0244</b>   | <b>0.0004</b>     | 0.4360           | 0.3814            | <b>0.0047</b> | 1251 ± 96   | 1220 ± 28   | 1114 ± 67   | 833 ± 58    |
| 200668_s_at | UBE2D3  | ubiquitin-conjugating enzyme E2D 3                     | <b>-0.0123</b>   | 0.1383            | -0.0624          | 0.4014            | 0.3154        | 1701 ± 174  | 1461 ± 166  | 1428 ± 173  | 1237 ± 143  |
| 210024_s_at | UBE2E3  | ubiquitin-conjugating enzyme E2E 3                     | <b>-0.0428</b>   | 0.2272            | 0.3539           | -0.4538           | 0.6664        | 1951 ± 200  | 1924 ± 259  | 1628 ± 187  | 1670 ± 277  |
| 209142_s_at | UBE2G1  | ubiquitin-conjugating enzyme E2G 1                     | <b>-0.0429</b>   | <b>0.0213</b>     | -0.0623          | 0.3811            | 0.0743        | 796 ± 41    | 835 ± 45    | 719 ± 51    | 640 ± 62    |
| 203109_at   | UBE2M   | ubiquitin-conjugating enzyme E2M                       | <b>-0.0220</b>   | 0.0756            | -0.3919          | 0.2547            | 0.2814        | 1107 ± 136  | 924 ± 88    | 920 ± 74    | 799 ± 127   |
| 212751_at   | UBE2N   | ubiquitin-conjugating enzyme E2N                       | <b>-0.0062</b>   | <b>0.0048</b>     | 0.4911           | 0.2554            | <b>0.0496</b> | 1362 ± 182  | 1173 ± 169  | 865 ± 115   | 755 ± 177   |
| 201524_x_at | UBE2N   | ubiquitin-conjugating enzyme E2N                       | <b>-0.0183</b>   | <b>0.0062</b>     | -0.4656          | -0.0682           | <b>0.0070</b> | 1417 ± 62   | 1508 ± 88   | 1309 ± 70   | 1096 ± 89   |
| 201002_s_at | UBE2V1  | ubiquitin-conjugating enzyme E2 variant 1              | <b>-0.0091</b>   | <b>0.0088</b>     | -0.2003          | 0.2026            | <b>0.0155</b> | 1546 ± 90   | 1389 ± 117  | 1095 ± 105  | 1170 ± 111  |
| 211069_s_at | UBL1    | ubiquitin-like 1                                       | -0.0602          | <b>0.0082</b>     | -0.3069          | 0.3080            | <b>0.0521</b> | 1848 ± 93   | 1904 ± 79   | 1798 ± 74   | 1468 ± 170  |
| 201534_s_at | UBL3    | ubiquitin-like 3                                       | <b>-0.0024</b>   | 0.1095            | -0.2144          | 0.3032            | 0.3667        | 866 ± 115   | 808 ± 133   | 641 ± 102   | 601 ± 132   |
| 201535_at   | UBL3    | ubiquitin-like 3                                       | <b>-0.0382</b>   | 0.3014            | -0.4527          | 0.3896            | 0.5000        | 4421 ± 287  | 4207 ± 353  | 3838 ± 222  | 3950 ± 348  |

| Probe set   | Name    | Description                                       | NFT <sub>0</sub> | MMSE <sub>0</sub> | NFT <sub>1</sub> | MMSE <sub>1</sub> | ANOVA         | Control    | Incipient   | Moderate   | Severe      |
|-------------|---------|---------------------------------------------------|------------------|-------------------|------------------|-------------------|---------------|------------|-------------|------------|-------------|
| 218011_at   | UBL5    | ubiquitin-like 5                                  | <b>-0.0312</b>   | <b>0.0229</b>     | 0.2939           | 0.3142            | 0.1035        | 830 ± 81   | 854 ± 35    | 630 ± 52   | 633 ± 109   |
| 218082_s_at | UBP1    | upstream binding protein 1                        | -0.2317          | <b>0.0211</b>     | -0.2324          | <b>0.0337</b>     | <b>0.0186</b> | 1056 ± 65  | 843 ± 74    | 970 ± 44   | 785 ± 62    |
| 212006_at   | UBXD2   | UBX domain containing 2                           | <b>-0.0091</b>   | 0.0800            | 0.4767           | -0.0648           | 0.1506        | 584 ± 33   | 579 ± 47    | 485 ± 19   | 481 ± 58    |
| 201387_s_at | UCHL1   | ubiquitin carboxyl-terminal esterase L1           | -0.0663          | <b>0.0467</b>     | -0.2296          | 0.2168            | 0.1405        | 6962 ± 994 | 5602 ± 1002 | 3932 ± 611 | 4352 ± 1364 |
| 204616_at   | UCHL3   | ubiquitin carboxyl-terminal esterase L3           | <b>-0.0093</b>   | 0.1875            | -0.0760          | -0.3619           | 0.2967        | 411 ± 32   | 338 ± 74    | 326 ± 25   | 271 ± 60    |
| 218801_at   | UGCGL2  | UDP-glucose ceramide glucosyltransferase-like 2   | <b>-0.0004</b>   | <b>0.0002</b>     | -0.4237          | -0.3729           | <b>0.0007</b> | 614 ± 29   | 540 ± 59    | 472 ± 51   | 333 ± 26    |
| 205480_s_at | UGP2    | UDP-glucose pyrophosphorylase 2                   | <b>-0.0388</b>   | <b>0.0076</b>     | -0.3493          | 0.2741            | <b>0.0337</b> | 3115 ± 243 | 2863 ± 250  | 2288 ± 58  | 2135 ± 354  |
| 202433_at   | UGTREL1 | UDP-galactose transporter related                 | <b>-0.0001</b>   | <b>0.0006</b>     | -0.0738          | 0.1137            | <b>0.0016</b> | 537 ± 28   | 470 ± 56    | 387 ± 24   | 324 ± 29    |
| 203790_s_at | UK114   | translational inhibitor protein p14.5             | <b>-0.0031</b>   | <b>0.0082</b>     | -0.1759          | 0.2522            | <b>0.0374</b> | 973 ± 101  | 803 ± 72    | 713 ± 83   | 613 ± 76    |
| 204062_s_at | ULK2    | unc-51-like kinase 2                              | <b>-0.0209</b>   | 0.0989            | -0.2918          | 0.3282            | 0.2445        | 830 ± 58   | 773 ± 69    | 771 ± 50   | 661 ± 54    |
| 202090_s_at | UQCR    | ubiquinol-cytochrome c reductase subunit          | <b>-0.0033</b>   | <b>0.0268</b>     | <b>-0.0514</b>   | 0.1684            | <b>0.0307</b> | 4040 ± 90  | 3663 ± 166  | 3747 ± 264 | 3133 ± 236  |
| 201903_at   | UQCRC1  | ubiquinol-cytochrome c reductase core protein I   | <b>-0.0064</b>   | <b>0.0060</b>     | -0.3529          | 0.3425            | <b>0.0308</b> | 1596 ± 193 | 1347 ± 223  | 1265 ± 146 | 756 ± 189   |
| 212600_s_at | UQCRC2  | ubiquinol-cytochrome c reductase core protein II  | <b>-0.0057</b>   | <b>0.0159</b>     | -0.3826          | 0.2901            | 0.0695        | 2346 ± 219 | 2055 ± 195  | 1747 ± 157 | 1608 ± 247  |
| 200883_at   | UQCRC2  | ubiquinol-cytochrome c reductase core protein II  | <b>-0.0457</b>   | <b>0.0280</b>     | -0.4999          | 0.3653            | 0.1309        | 635 ± 103  | 564 ± 87    | 412 ± 43   | 370 ± 104   |
| 202233_s_at | UQCRH   | ubiquinol-cytochrome c reductase hinge protein    | <b>-0.0044</b>   | <b>0.0074</b>     | -0.3256          | 0.4173            | <b>0.0263</b> | 2950 ± 274 | 2536 ± 328  | 2079 ± 190 | 1747 ± 331  |
| 203031_s_at | UROS    | uroporphyrinogen III synthase                     | -0.1470          | <b>0.0183</b>     | 0.2132           | <b>0.0104</b>     | <b>0.0280</b> | 1484 ± 131 | 1086 ± 68   | 1181 ± 86  | 1068 ± 75   |
| 209137_s_at | USP10   | ubiquitin specific protease 10                    | -0.0971          | <b>0.0031</b>     | -0.1373          | -0.4759           | <b>0.0250</b> | 389 ± 28   | 335 ± 49    | 281 ± 32   | 215 ± 50    |
| 201672_s_at | USP14   | ubiquitin specific protease 14                    | <b>-0.0401</b>   | <b>0.0345</b>     | -0.2163          | 0.1085            | 0.1164        | 1839 ± 106 | 1657 ± 98   | 1554 ± 42  | 1558 ± 106  |
| 209475_at   | USP15   | ubiquitin specific protease 15                    | <b>-0.0013</b>   | <b>0.0097</b>     | <b>-0.0193</b>   | -0.4392           | <b>0.0509</b> | 850 ± 38   | 799 ± 80    | 734 ± 61   | 623 ± 20    |
| 220419_s_at | USP25   | ubiquitin specific protease 25                    | <b>-0.0060</b>   | <b>0.0005</b>     | -0.3662          | 0.2669            | <b>0.0018</b> | 1310 ± 68  | 1243 ± 77   | 1073 ± 27  | 979 ± 53    |
| 206405_x_at | USP6    | ubiquitin specific protease 6                     | <b>-0.0096</b>   | 0.5816            | <b>-0.0089</b>   | -0.3005           | 0.8362        | 2521 ± 189 | 2491 ± 258  | 2398 ± 266 | 2244 ± 196  |
| 201099_at   | USP9X   | ubiquitin specific protease 9, X chromosome       | <b>-0.0355</b>   | 0.3307            | 0.4552           | 0.2730            | 0.7737        | 1032 ± 69  | 1004 ± 62   | 947 ± 48   | 950 ± 98    |
| 206624_at   | USP9Y   | ubiquitin specific protease 9, Y chromosome       | <b>-0.0539</b>   | <b>0.0298</b>     | 0.4829           | -0.3926           | <b>0.0380</b> | 141 ± 31   | 83 ± 42     | 51 ± 21    | 25 ± 5      |
| 219675_s_at | UXS1    | UDP-glucuronate decarboxylase 1                   | <b>-0.0131</b>   | 0.2276            | -0.4129          | -0.4291           | 0.4580        | 634 ± 26   | 557 ± 51    | 587 ± 38   | 523 ± 78    |
| 207100_s_at | VAMP1   | vesicle-associated membrane protein 1             | <b>-0.0274</b>   | <b>0.0178</b>     | <b>-0.0465</b>   | 0.3950            | 0.0562        | 335 ± 51   | 285 ± 70    | 272 ± 21   | 138 ± 15    |
| 214792_x_at | VAMP2   | vesicle-associated membrane protein 2             | -0.1776          | <b>0.0237</b>     | -0.2574          | -0.4668           | <b>0.0487</b> | 1936 ± 135 | 1999 ± 219  | 2052 ± 226 | 1309 ± 185  |
| 201557_at   | VAMP2   | vesicle-associated membrane protein 2             | -0.1559          | <b>0.0449</b>     | 0.3258           | 0.2743            | 0.2215        | 2689 ± 238 | 2436 ± 101  | 2539 ± 264 | 2013 ± 230  |
| 201797_s_at | VAR52   | valyl-tRNA synthetase 2                           | -0.4150          | <b>0.0022</b>     | 0.3993           | 0.0710            | <b>0.0377</b> | 220 ± 14   | 231 ± 20    | 204 ± 18   | 158 ± 17    |
| 201472_at   | VBP1    | von Hippel-Lindau binding protein 1               | <b>-0.0195</b>   | 0.0892            | -0.4450          | 0.4495            | 0.2022        | 2796 ± 165 | 2523 ± 285  | 2324 ± 164 | 2174 ± 256  |
| 208649_s_at | VCP     | valosin-containing protein                        | <b>-0.0483</b>   | <b>0.0323</b>     | -0.3824          | 0.4511            | 0.1692        | 757 ± 79   | 713 ± 65    | 635 ± 43   | 553 ± 69    |
| 212038_s_at | VDAC1   | voltage-dependent anion channel 1                 | <b>-0.0163</b>   | <b>0.0041</b>     | -0.3186          | 0.3990            | <b>0.0238</b> | 1726 ± 263 | 1504 ± 287  | 1056 ± 109 | 726 ± 176   |
| 208846_s_at | VDAC3   | voltage-dependent anion channel 3                 | <b>-0.0044</b>   | 0.1040            | -0.1491          | -0.4768           | 0.2434        | 719 ± 77   | 682 ± 66    | 533 ± 50   | 542 ± 118   |
| 212513_s_at | VDU1    | pVHL-interacting deubiquitinating enzyme 1        | <b>-0.0216</b>   | 0.0729            | 0.4101           | -0.4185           | 0.1997        | 2189 ± 235 | 2038 ± 196  | 1773 ± 53  | 1646 ± 201  |
| 212171_x_at | VEGF    | vascular endothelial growth factor                | <b>-0.0468</b>   | 0.1701            | -0.3508          | -0.4864           | <b>0.0506</b> | 510 ± 47   | 483 ± 51    | 324 ± 31   | 425 ± 57    |
| 210512_s_at | VEGF    | vascular endothelial growth factor                | -0.0901          | <b>0.0356</b>     | 0.4581           | -0.3666           | 0.0853        | 1107 ± 238 | 1151 ± 221  | 602 ± 107  | 600 ± 122   |
| 206577_at   | VIP     | vasoactive intestinal peptide                     | <b>-0.0265</b>   | 0.0594            | 0.0878           | 0.4526            | 0.1772        | 175 ± 15   | 187 ± 23    | 172 ± 38   | 103 ± 27    |
| 209822_s_at | VLDLR   | very low density lipoprotein receptor             | <b>-0.0016</b>   | <b>0.0124</b>     | 0.0791           | 0.3557            | <b>0.0063</b> | 377 ± 24   | 439 ± 33    | 306 ± 14   | 323 ± 26    |
| 220990_s_at | VMP1    | likely ortholog of rat vacuole membrane protein 1 | <b>-0.0025</b>   | <b>0.0175</b>     | 0.4602           | -0.2128           | <b>0.0332</b> | 922 ± 66   | 919 ± 80    | 759 ± 71   | 652 ± 43    |
| 44111_at    | VPS33B  | vacuolar protein sorting 33B                      | -0.3396          | <b>0.0054</b>     | 0.0640           | 0.2743            | 0.1035        | 843 ± 60   | 855 ± 100   | 769 ± 85   | 589 ± 33    |

| Probe set   | Name   | Description                                           | NFT <sub>0</sub> | MMSE <sub>0</sub> | NFT <sub>1</sub> | MMSE <sub>1</sub> | ANOVA  | Control     | Incipient   | Moderate   | Severe     |
|-------------|--------|-------------------------------------------------------|------------------|-------------------|------------------|-------------------|--------|-------------|-------------|------------|------------|
| 210849_s_at | VPS41  | vacuolar protein sorting 41                           | -0.0065          | 0.0297            | -0.1044          | 0.2867            | 0.0305 | 1264 ± 31   | 1059 ± 80   | 997 ± 72   | 1023 ± 77  |
| 203797_at   | VSNL1  | visinin-like 1                                        | -0.0075          | 0.0013            | -0.3812          | -0.4878           | 0.0099 | 9648 ± 1630 | 8391 ± 1803 | 5029 ± 797 | 3272 ± 584 |
| 203798_s_at | VSNL1  | visinin-like 1                                        | -0.0390          | 0.0026            | 0.4303           | 0.1385            | 0.0460 | 816 ± 229   | 661 ± 144   | 347 ± 64   | 213 ± 81   |
| 202112_at   | VWF    | von Willebrand factor                                 | -0.0140          | 0.0076            | 0.4462           | -0.4464           | 0.0183 | 1310 ± 130  | 1518 ± 180  | 1201 ± 119 | 789 ± 167  |
| 204165_at   | WASF1  | WAS protein family, member 1                          | -0.0045          | 0.0033            | -0.3634          | 0.3330            | 0.0220 | 5692 ± 502  | 4718 ± 836  | 3492 ± 491 | 3152 ± 651 |
| 217822_at   | WBP11  | WW domain binding protein 11                          | -0.1465          | 0.0495            | 0.1003           | 0.2961            | 0.2847 | 775 ± 85    | 765 ± 68    | 679 ± 27   | 611 ± 20   |
| 203599_s_at | WBP4   | WW domain binding protein 4                           | -0.0153          | 0.0877            | -0.3956          | 0.0905            | 0.1322 | 734 ± 55    | 704 ± 38    | 562 ± 56   | 620 ± 68   |
| 218512_at   | WDR12  | WD repeat domain 12                                   | -0.0710          | 0.0075            | -0.2317          | 0.1773            | 0.1246 | 627 ± 32    | 606 ± 46    | 576 ± 18   | 521 ± 24   |
| 212880_at   | WDR7   | WD repeat domain 7                                    | -0.0039          | 0.0039            | -0.2904          | 0.3777            | 0.0297 | 3046 ± 313  | 2624 ± 395  | 2044 ± 258 | 1752 ± 290 |
| 219478_at   | WFDC1  | WAP four-disulfide core domain 1                      | -0.0005          | 0.0002            | -0.1372          | 0.0313            | 0.0023 | 780 ± 59    | 623 ± 63    | 535 ± 29   | 469 ± 65   |
| 204712_at   | WIF1   | WNT inhibitory factor 1                               | -0.0048          | 0.0041            | -0.3439          | 0.1647            | 0.0116 | 1138 ± 243  | 813 ± 235   | 280 ± 33   | 379 ± 128  |
| 219628_at   | WIG1   | p53 target zinc finger protein                        | -0.0247          | 0.0197            | -0.0161          | 0.4984            | 0.1305 | 794 ± 76    | 740 ± 108   | 725 ± 62   | 533 ± 61   |
| 202749_at   | WRB    | tryptophan rich basic protein                         | -0.0034          | 0.0007            | -0.2827          | 0.0453            | 0.0028 | 3422 ± 298  | 3044 ± 155  | 2309 ± 141 | 2181 ± 295 |
| 203261_at   | WS-3   | novel RGD-containing protein                          | -0.0125          | 0.0313            | -0.3433          | 0.1594            | 0.1371 | 1138 ± 119  | 1075 ± 160  | 799 ± 40   | 844 ± 120  |
| 221787_at   | XAP135 | PHD zinc finger protein XAP135                        | -0.0096          | 0.2054            | 0.1140           | -0.4259           | 0.4842 | 353 ± 24    | 383 ± 26    | 302 ± 27   | 303 ± 77   |
| 206698_at   | XK     | Kell blood group precursor                            | -0.0947          | 0.0364            | -0.4577          | 0.4347            | 0.0197 | 472 ± 51    | 422 ± 64    | 270 ± 9    | 354 ± 24   |
| 201352_at   | YME1L1 | YME1-like 1                                           | -0.0113          | 0.0839            | 0.2457           | -0.2831           | 0.1478 | 2050 ± 167  | 2119 ± 173  | 1659 ± 119 | 1756 ± 175 |
| 213655_at   | YWHAE  | tyrosine 3-/tryptophan 5-monooxygenase activ. epsilon | -0.0093          | 0.0606            | -0.4302          | -0.4287           | 0.2109 | 4052 ± 259  | 3746 ± 534  | 3401 ± 456 | 2899 ± 283 |
| 201020_at   | YWHAH  | tyrosine 3-/tryptophan 5-monooxygenase activ. eta     | -0.0183          | 0.0059            | -0.3574          | 0.2383            | 0.0436 | 3114 ± 602  | 2412 ± 540  | 1630 ± 246 | 1236 ± 284 |
| 200640_at   | YWHAZ  | tyrosine 3-/tryptophan 5-monooxygenase activ. zeta    | -0.0353          | 0.0518            | -0.4406          | -0.3858           | 0.1973 | 4558 ± 489  | 4866 ± 985  | 3934 ± 520 | 2849 ± 632 |
| 200638_s_at | YWHAZ  | tyrosine 3-/tryptophan 5-monooxygenase activ. zeta    | -0.0053          | 0.0009            | -0.4344          | 0.3967            | 0.0074 | 4107 ± 486  | 3585 ± 809  | 2781 ± 347 | 1280 ± 316 |
| 200639_s_at | YWHAZ  | tyrosine 3-/tryptophan 5-monooxygenase activ. zeta    | -0.0291          | 0.0034            | 0.3839           | 0.4706            | 0.0087 | 5410 ± 650  | 5158 ± 1020 | 5353 ± 534 | 2461 ± 193 |
| 200641_s_at | YWHAZ  | tyrosine 3-/tryptophan 5-monooxygenase activ. zeta    | -0.0381          | 0.0047            | -0.2785          | 0.2296            | 0.0440 | 1473 ± 231  | 1282 ± 286  | 831 ± 52   | 715 ± 90   |
| 202982_s_at | ZAP128 | peroxisomal long-chain acyl-coA thioesterase          | -0.3188          | 0.0470            | 0.3975           | 0.0968            | 0.3398 | 414 ± 48    | 366 ± 17    | 328 ± 37   | 310 ± 56   |
| 201856_s_at | ZFR    | zinc finger RNA binding protein                       | -0.0286          | 0.0984            | -0.0272          | 0.4674            | 0.1207 | 626 ± 51    | 574 ± 74    | 469 ± 29   | 513 ± 19   |
| 209243_s_at | ZIM2   | zinc finger, imprinted 2                              | -0.0802          | 0.0421            | -0.4885          | -0.1995           | 0.2032 | 282 ± 44    | 262 ± 45    | 224 ± 25   | 174 ± 26   |
| 204474_at   | ZNF142 | zinc finger protein 142                               | -0.0161          | 0.0092            | -0.1410          | 0.0818            | 0.0847 | 537 ± 20    | 499 ± 48    | 415 ± 52   | 378 ± 60   |
| 213452_at   | ZNF184 | zinc finger protein 184                               | -0.0280          | 0.0523            | 0.3838           | 0.3711            | 0.1273 | 384 ± 57    | 325 ± 69    | 251 ± 21   | 226 ± 46   |
| 214823_at   | ZNF204 | zinc finger protein 204                               | -0.0489          | 0.0430            | -0.3563          | 0.4082            | 0.2061 | 460 ± 64    | 394 ± 49    | 355 ± 47   | 299 ± 43   |
| 200828_s_at | ZNF207 | zinc finger protein 207                               | -0.0402          | 0.5566            | -0.0106          | 0.0439            | 0.2521 | 1262 ± 82   | 1123 ± 44   | 1074 ± 42  | 1195 ± 96  |
| 202051_s_at | ZNF262 | zinc finger protein 262                               | -0.0242          | 0.0081            | -0.3984          | 0.1513            | 0.1808 | 1099 ± 59   | 1042 ± 60   | 993 ± 64   | 897 ± 76   |
| 209741_x_at | ZNF291 | zinc finger protein 291                               | -0.0696          | 0.0231            | 0.1863           | 0.2275            | 0.2204 | 815 ± 76    | 752 ± 78    | 685 ± 59   | 618 ± 50   |
| 215596_s_at | ZNF294 | zinc finger protein 294                               | -0.0327          | 0.0262            | -0.3439          | -0.2542           | 0.0799 | 1070 ± 82   | 1032 ± 124  | 983 ± 76   | 732 ± 96   |
| 212749_s_at | ZNF363 | zinc finger protein 363                               | -0.0138          | 0.0743            | -0.1381          | 0.2829            | 0.0410 | 485 ± 31    | 384 ± 32    | 426 ± 41   | 334 ± 35   |
| 214813_at   | ZNF75  | zinc finger protein 75                                | -0.0471          | 0.3263            | 0.4446           | 0.1048            | 0.7372 | 158 ± 15    | 166 ± 21    | 140 ± 15   | 143 ± 23   |
| 204812_at   | ZW10   | ZW10 homolog, centromere/kinetochore protein          | -0.0153          | 0.0935            | -0.0017          | 0.1761            | 0.1609 | 548 ± 22    | 514 ± 26    | 447 ± 36   | 490 ± 40   |
